# Supplementary material
Source: publisher figshare collection journal article supplement (https://karger.figshare.com/articles/dataset/_/5120452)

## Supplementary Information

### Legend for Supplementary Figures 2.1-2.X

Maps of individual horse chromosomes showing the integration of the second generation radiation hybrid map (RH II; middle) with the two recent whole genome meiotic maps (viz., the IHRFP linkage map - Penedo et al. 2005, to the *left* and the AHT linkage map - Swinburne et al. 2006, to the *right*). The vertical rounded bar(s) represent RH or the meiotic linkage groups. CentiRay (cR) or centiMorgan (cM) distances are shown beside markers of either map. On the RH map (middle), the MLE-consensus markers are depicted in bold-italics while placed markers are in normal font. Binned markers are shown on the side of the RH or linkage maps and are assigned to a map region indicated by thin vertical lines. Markers shared between RH II and the meiotic maps are connected with lines. Markers in blue shaded boxes are binned on at least one of the three maps.

## ECA1

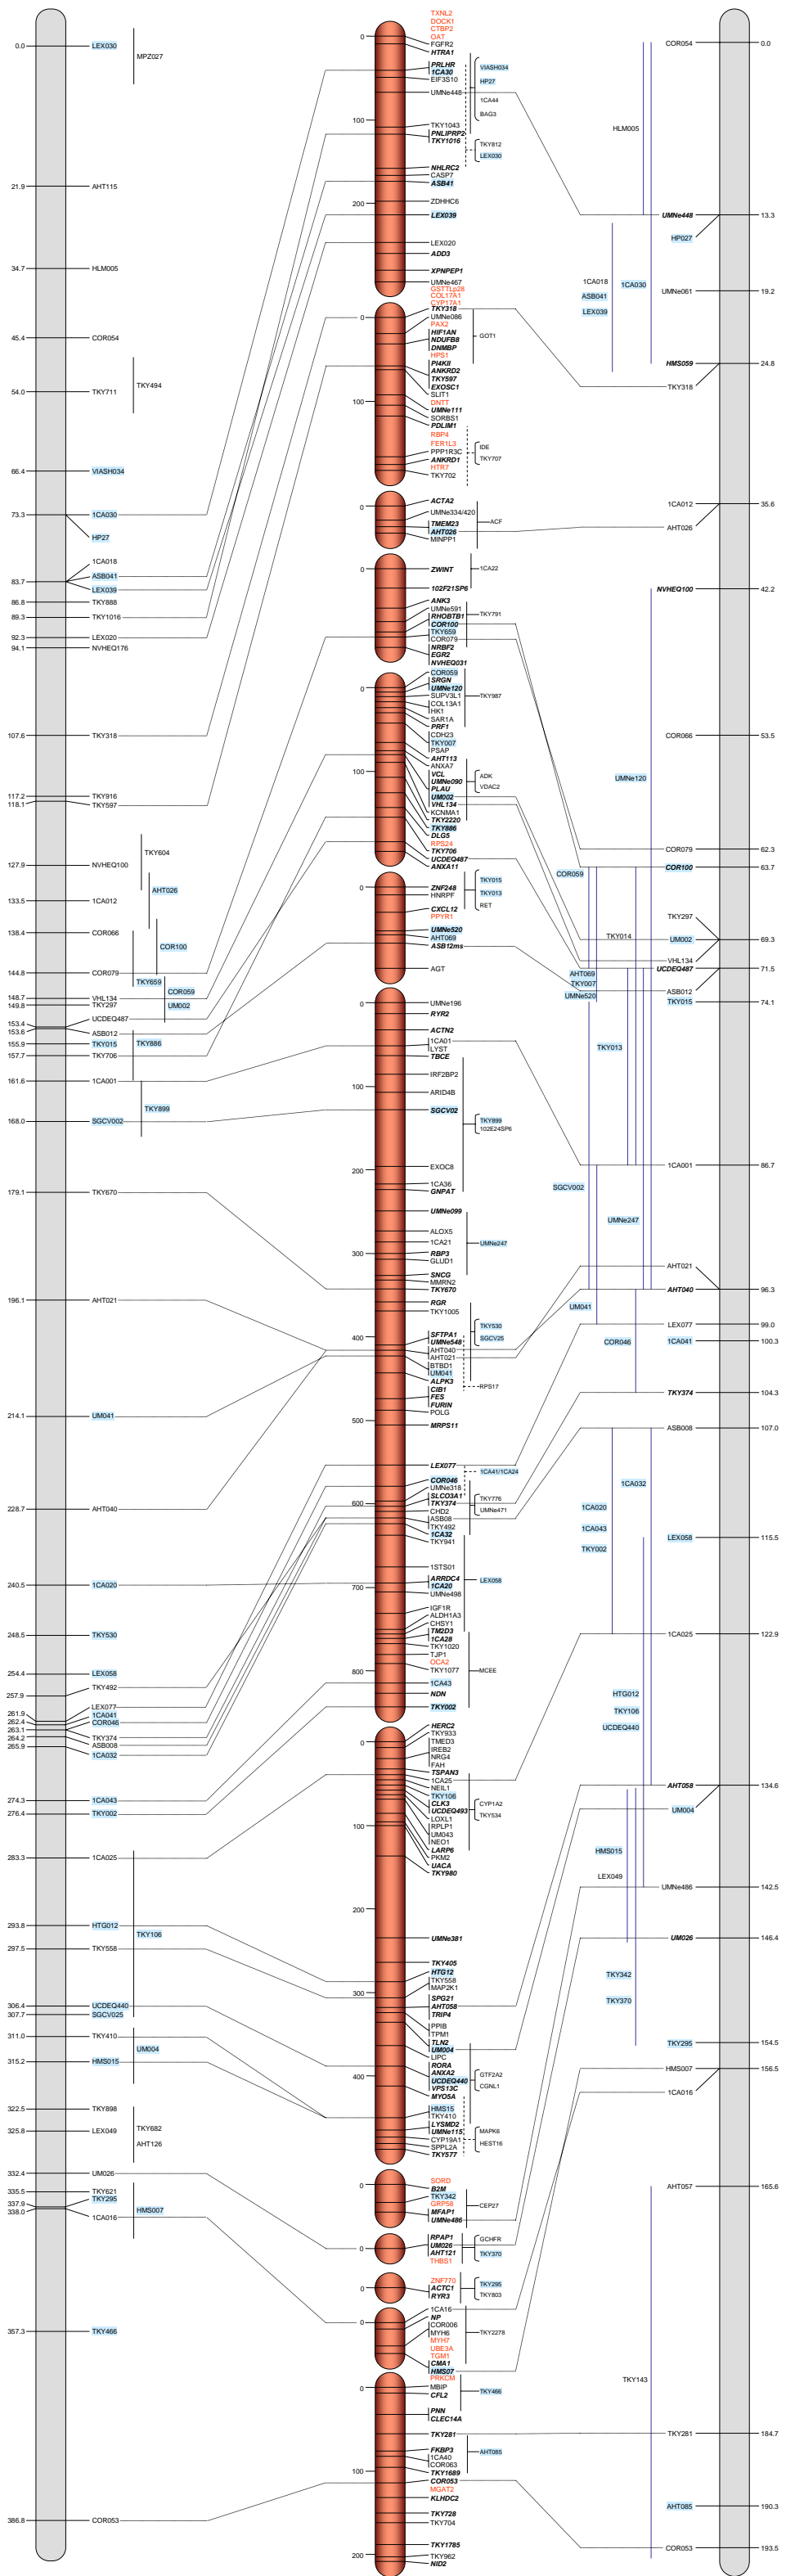

ECA 2

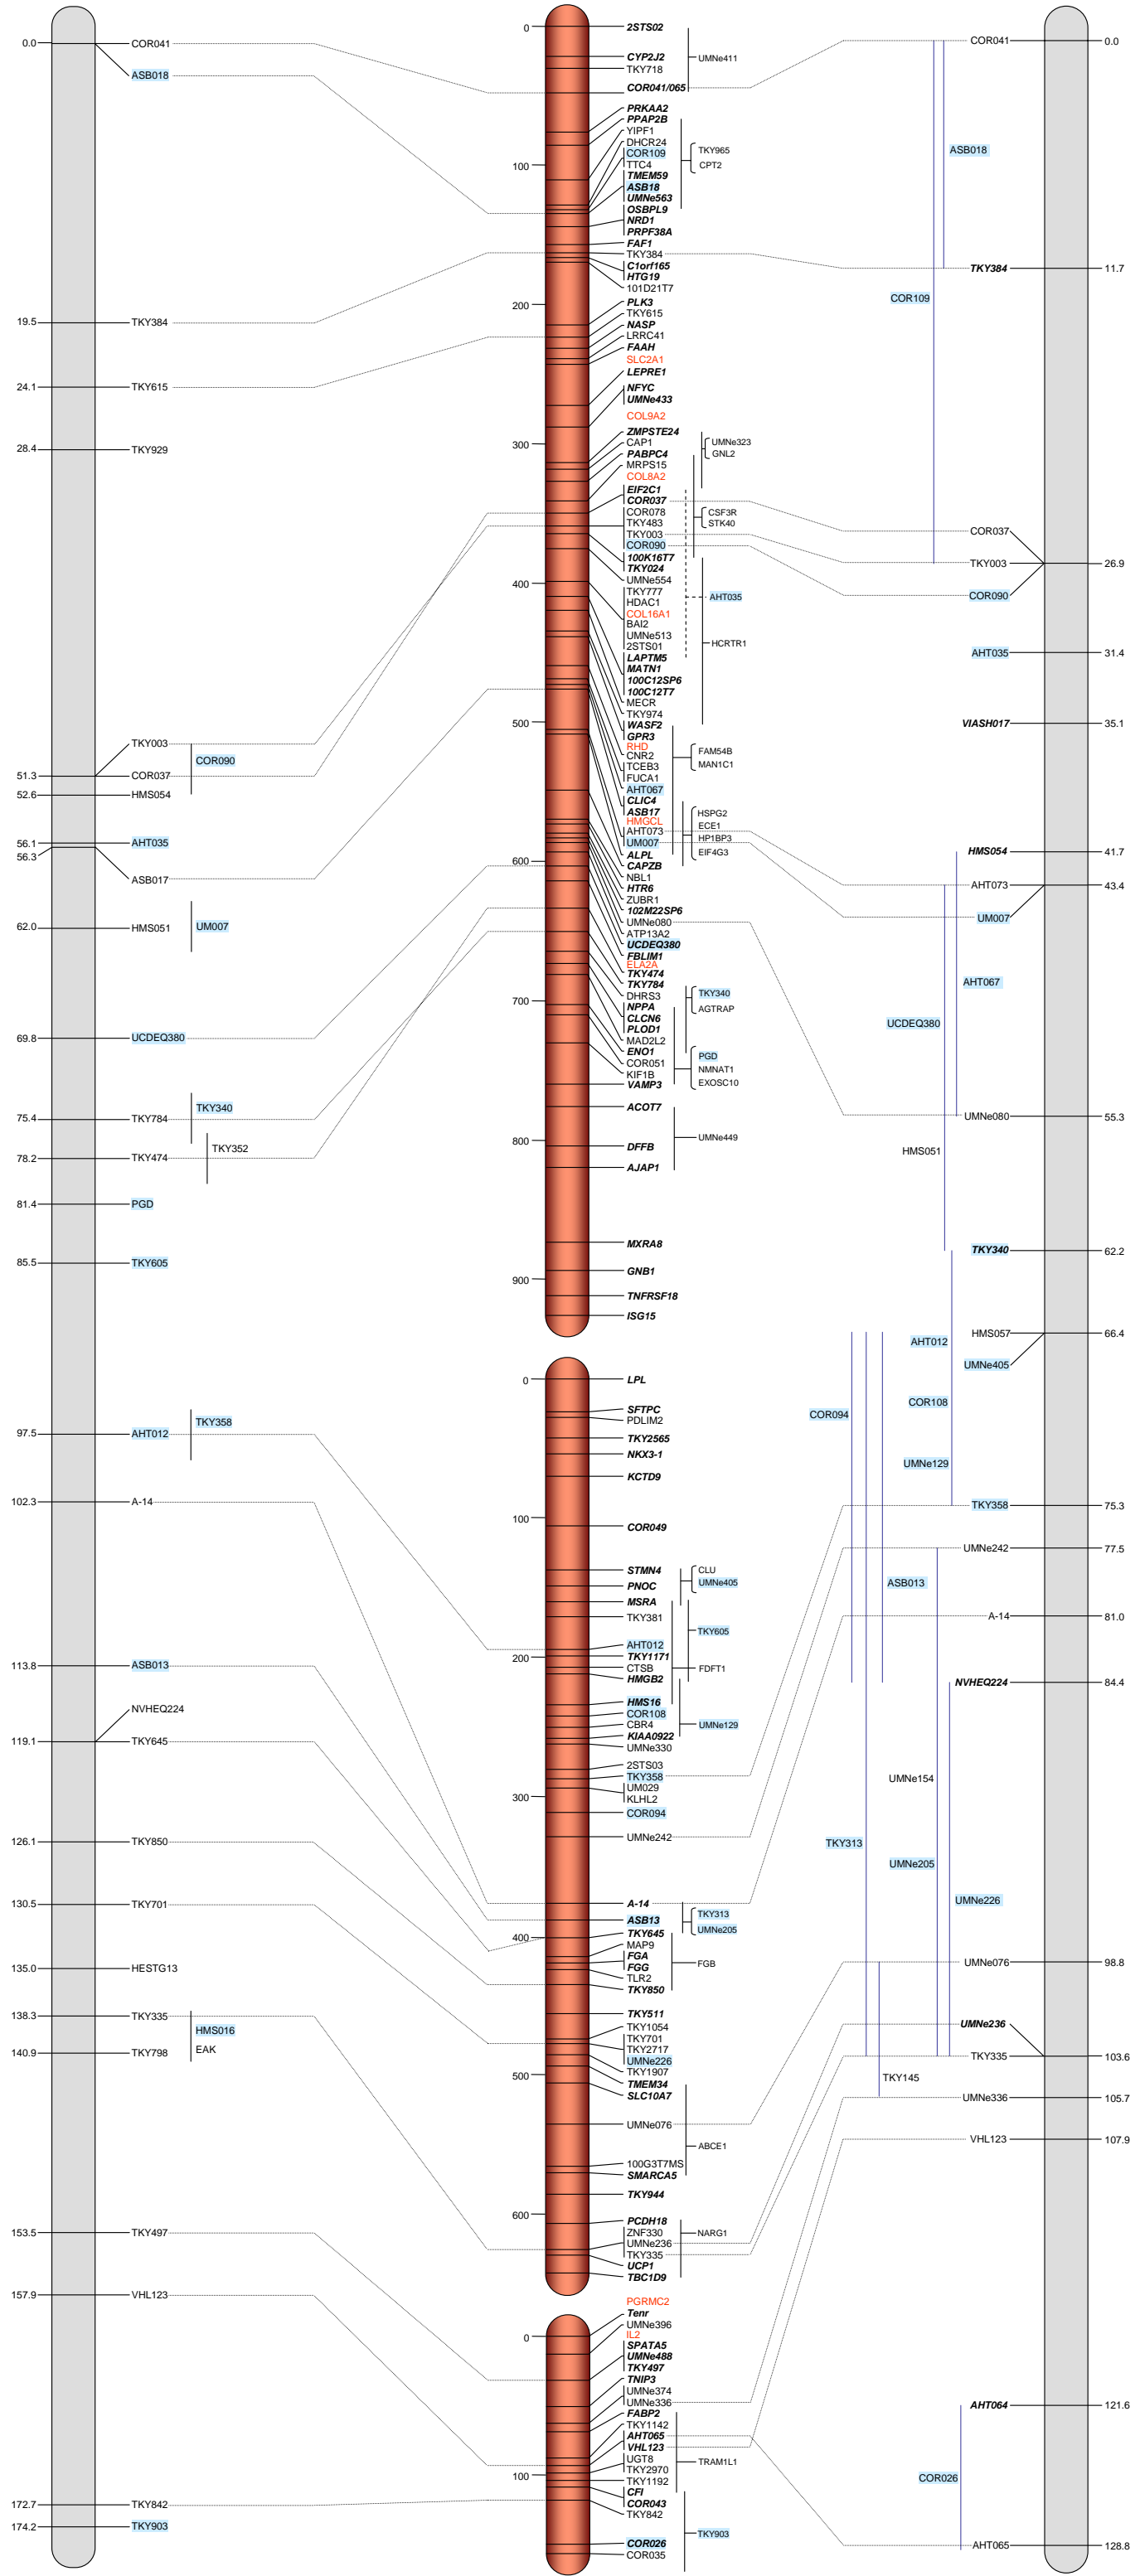

ECA3

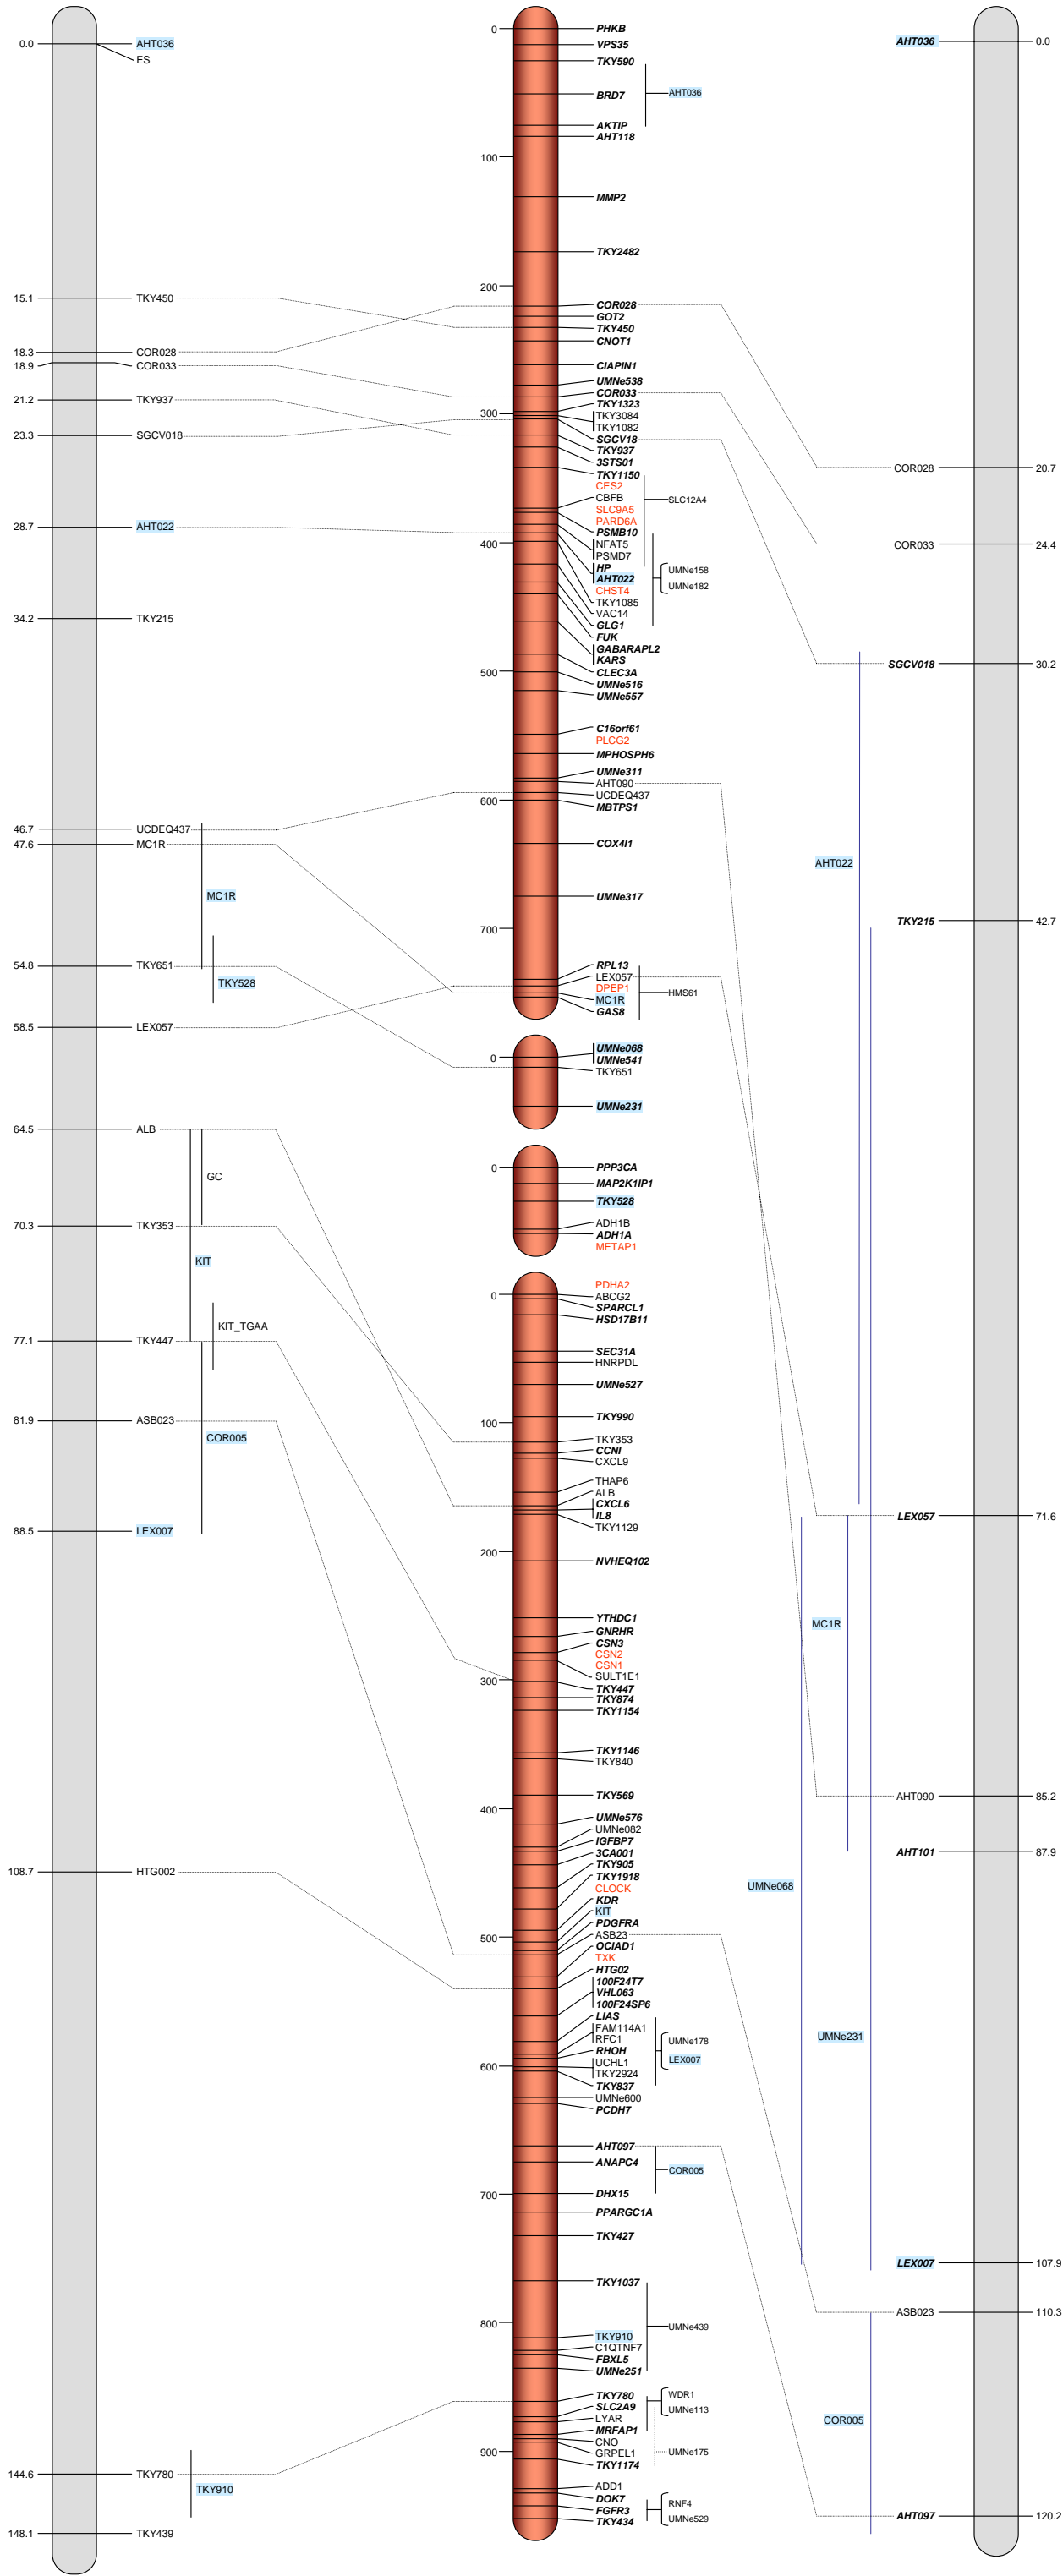

ECA4

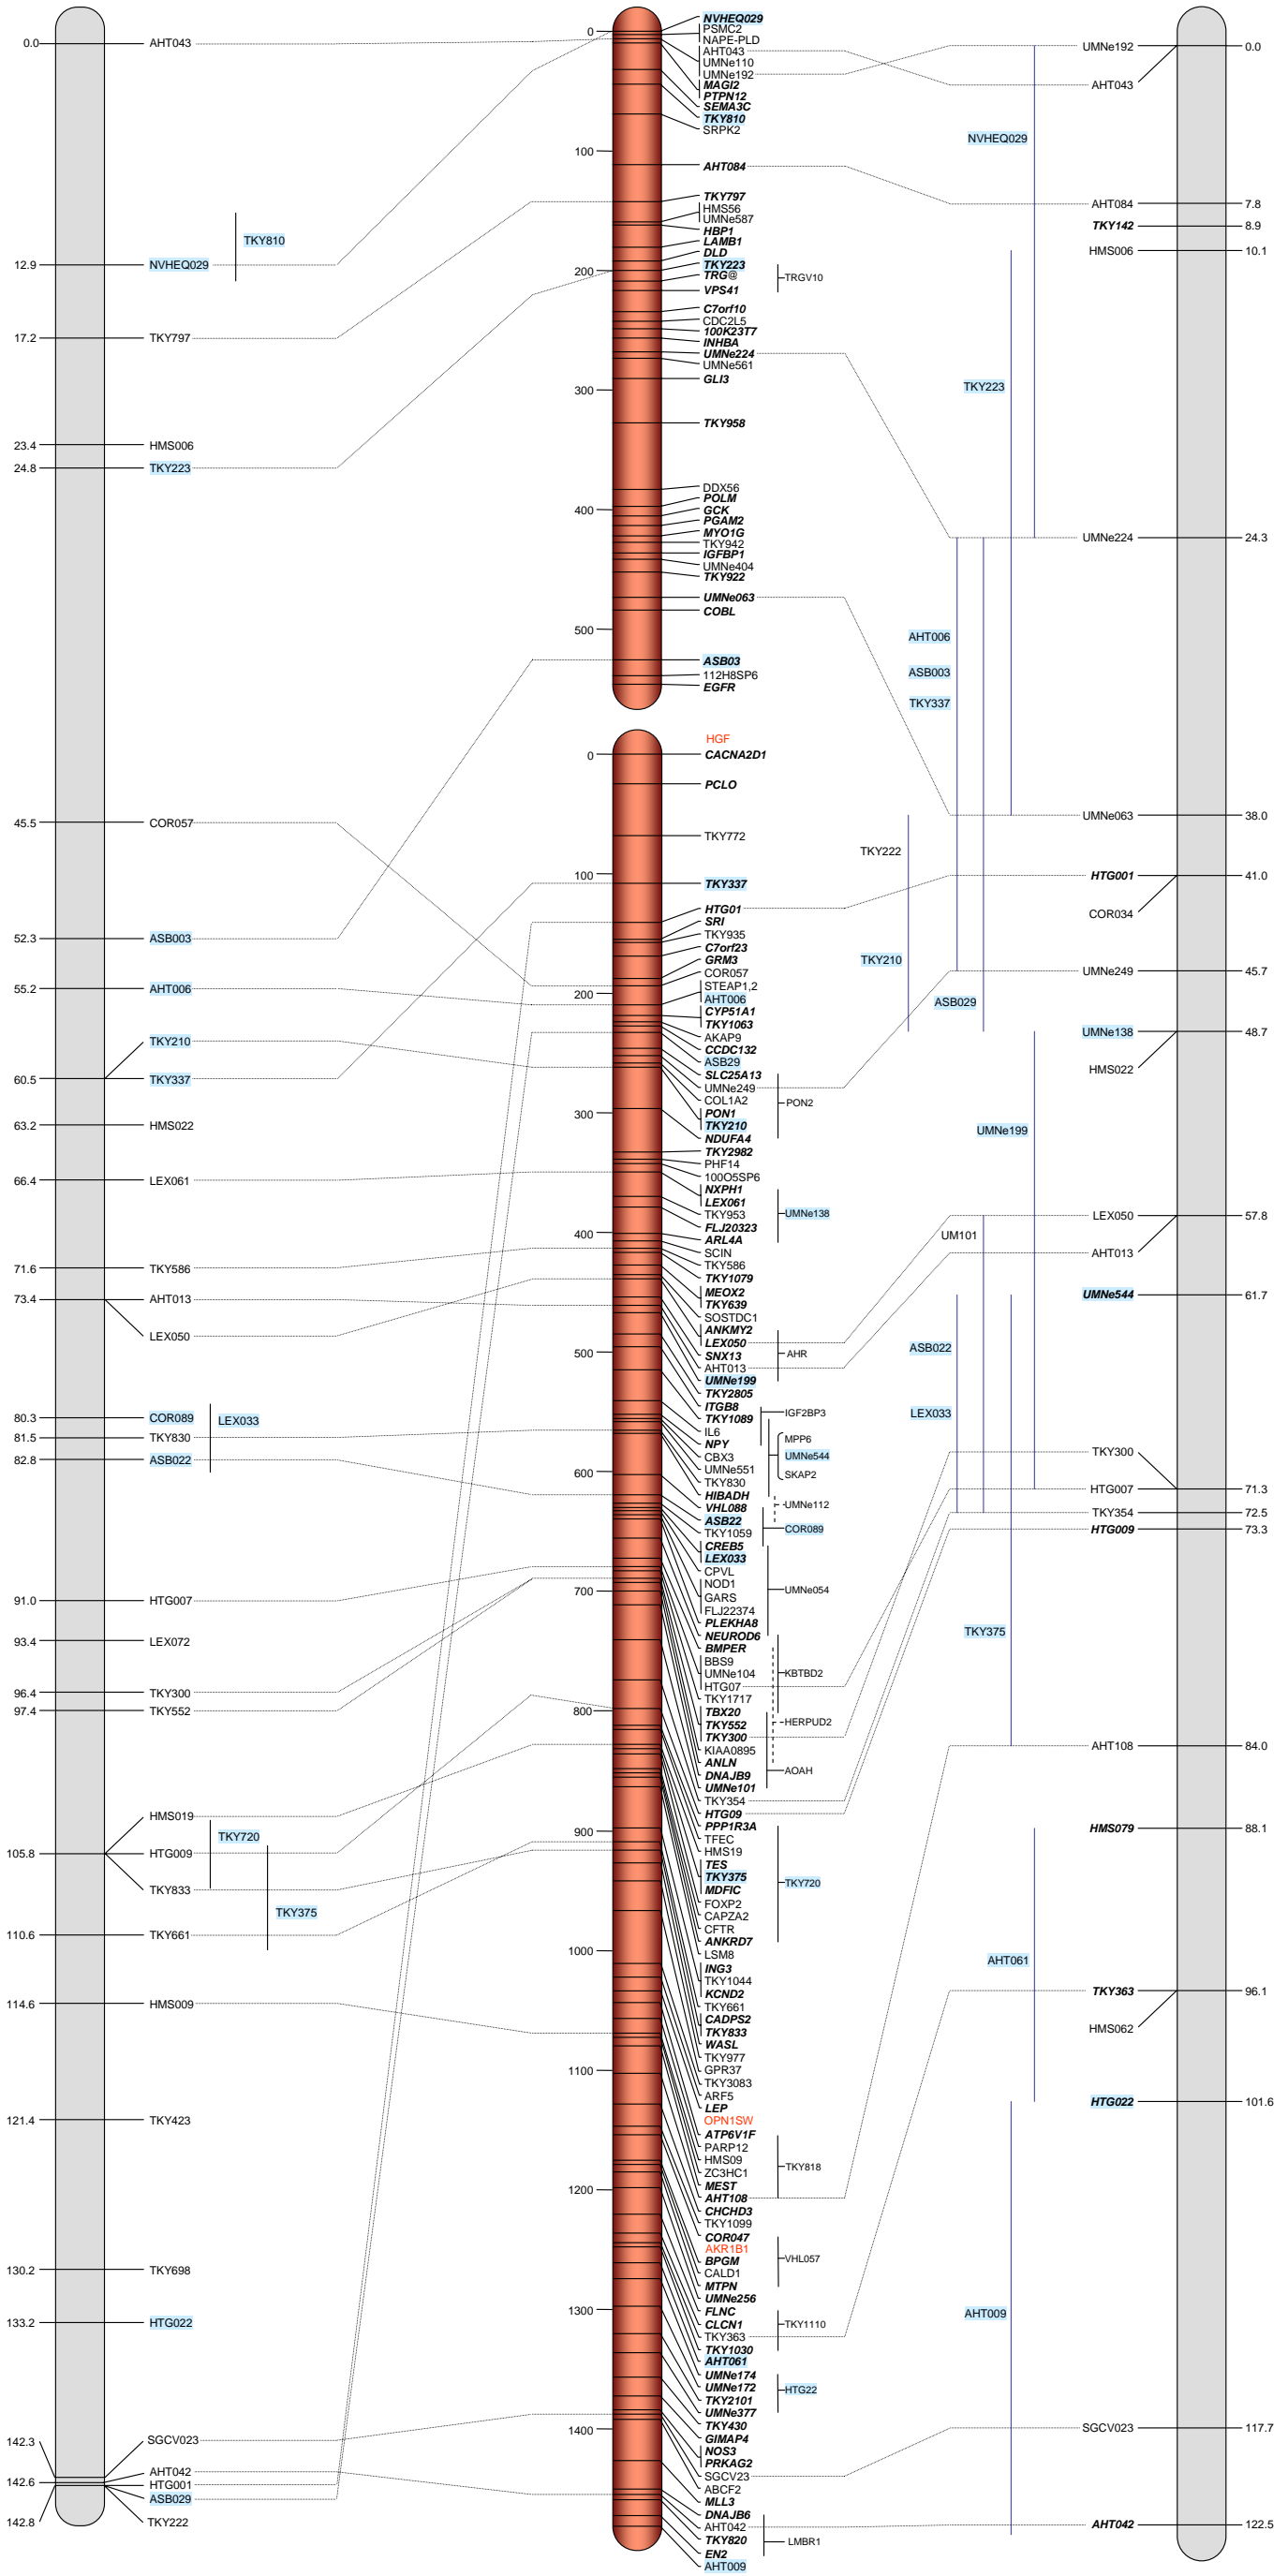

ECA 5

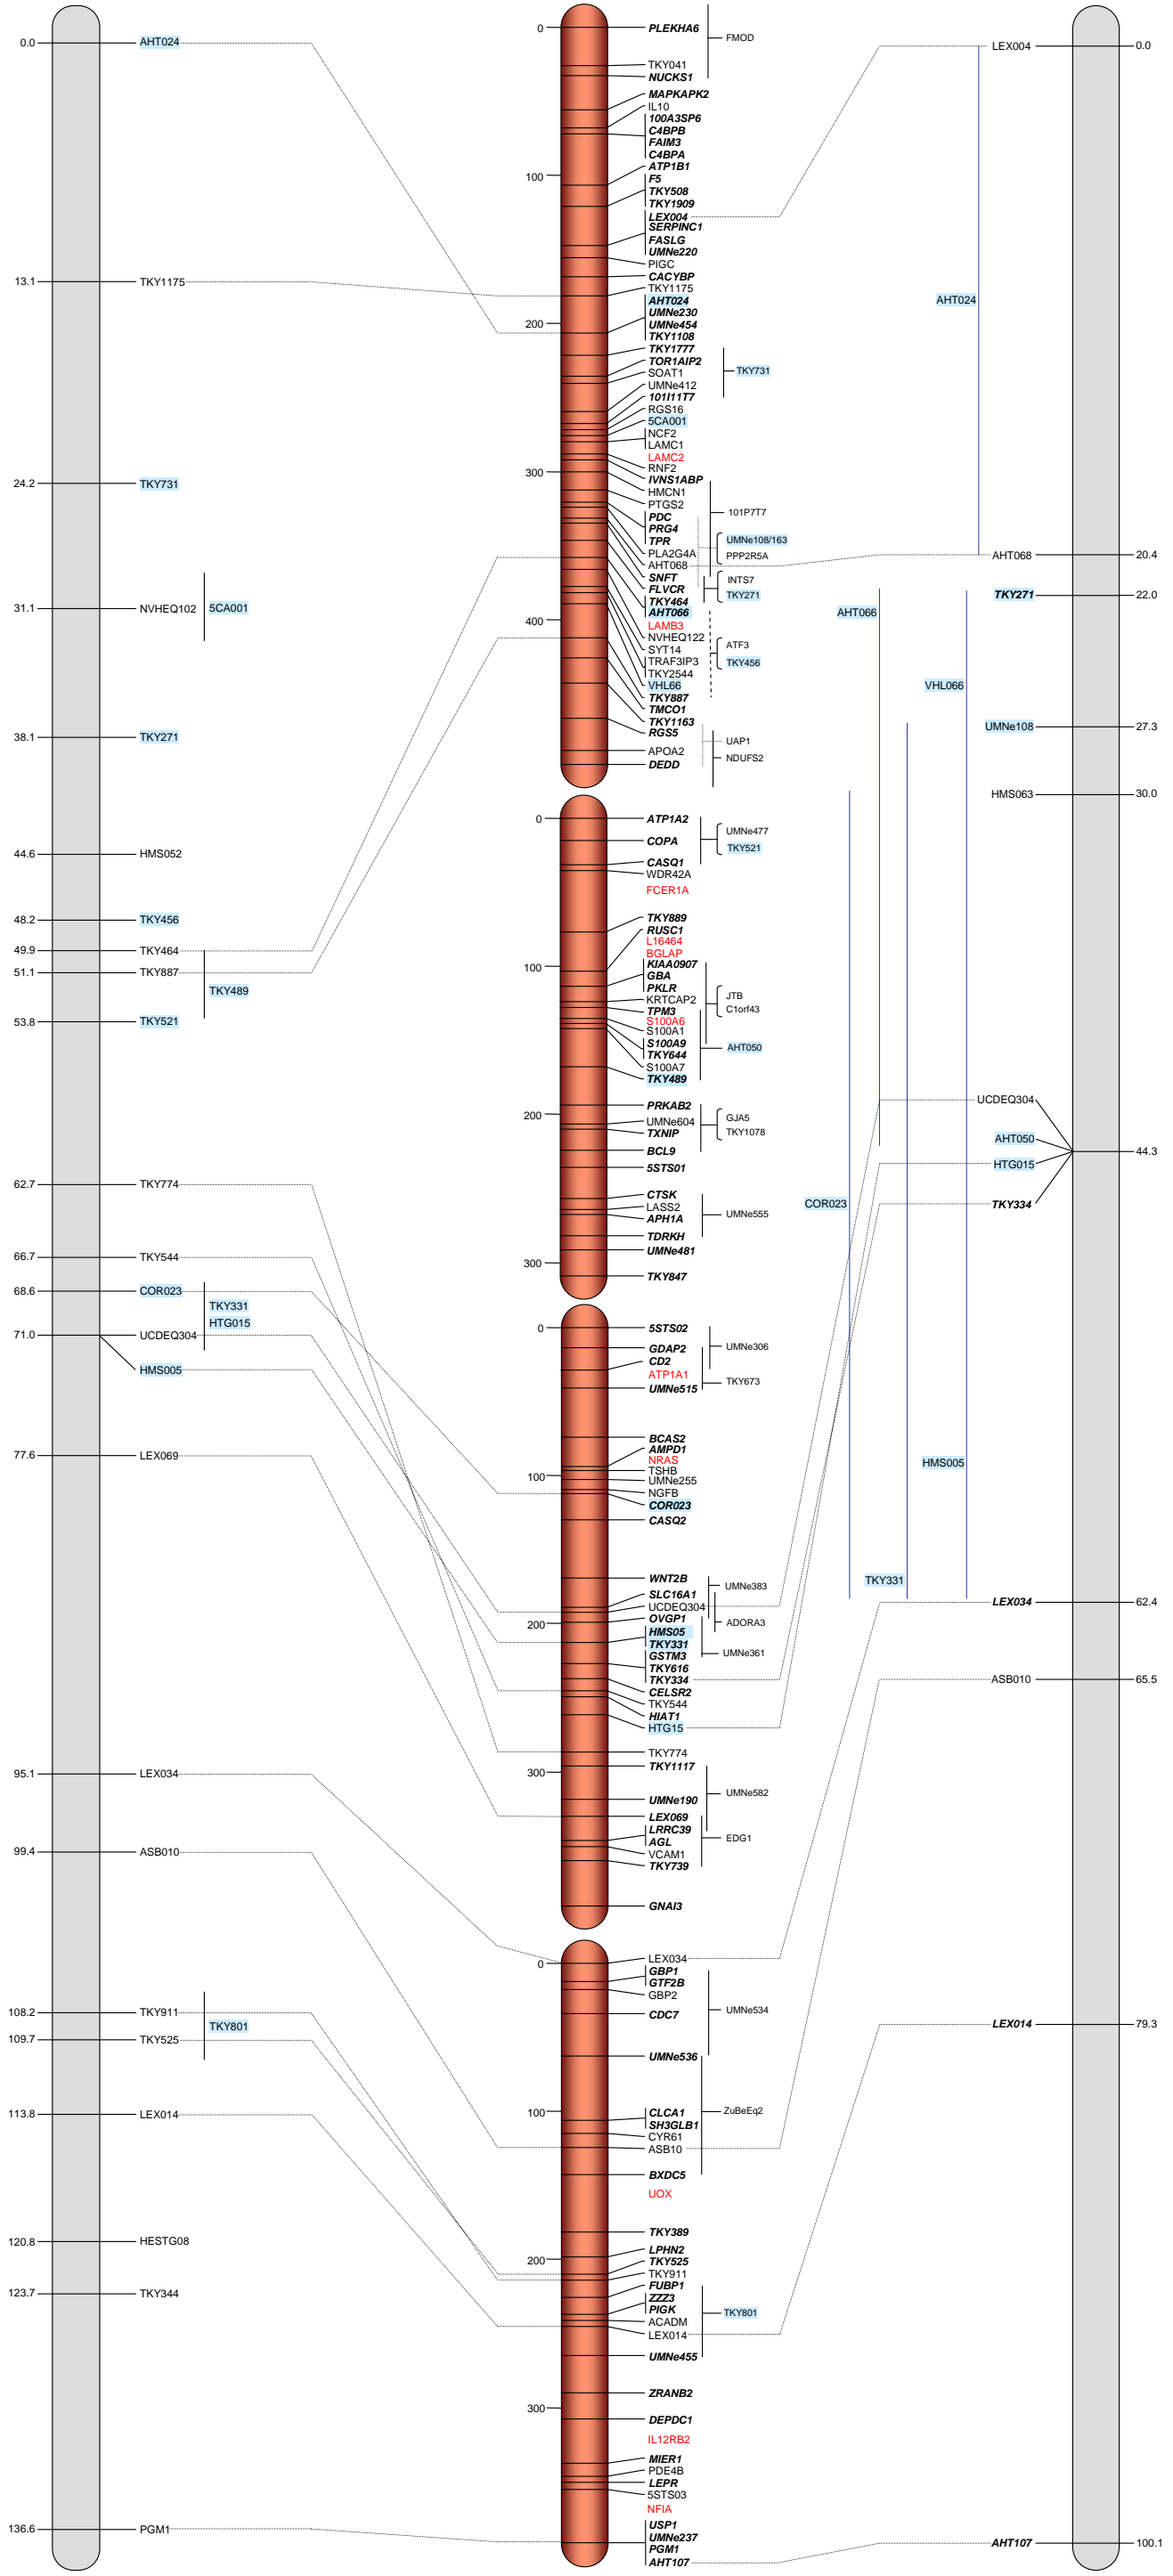

ECA6

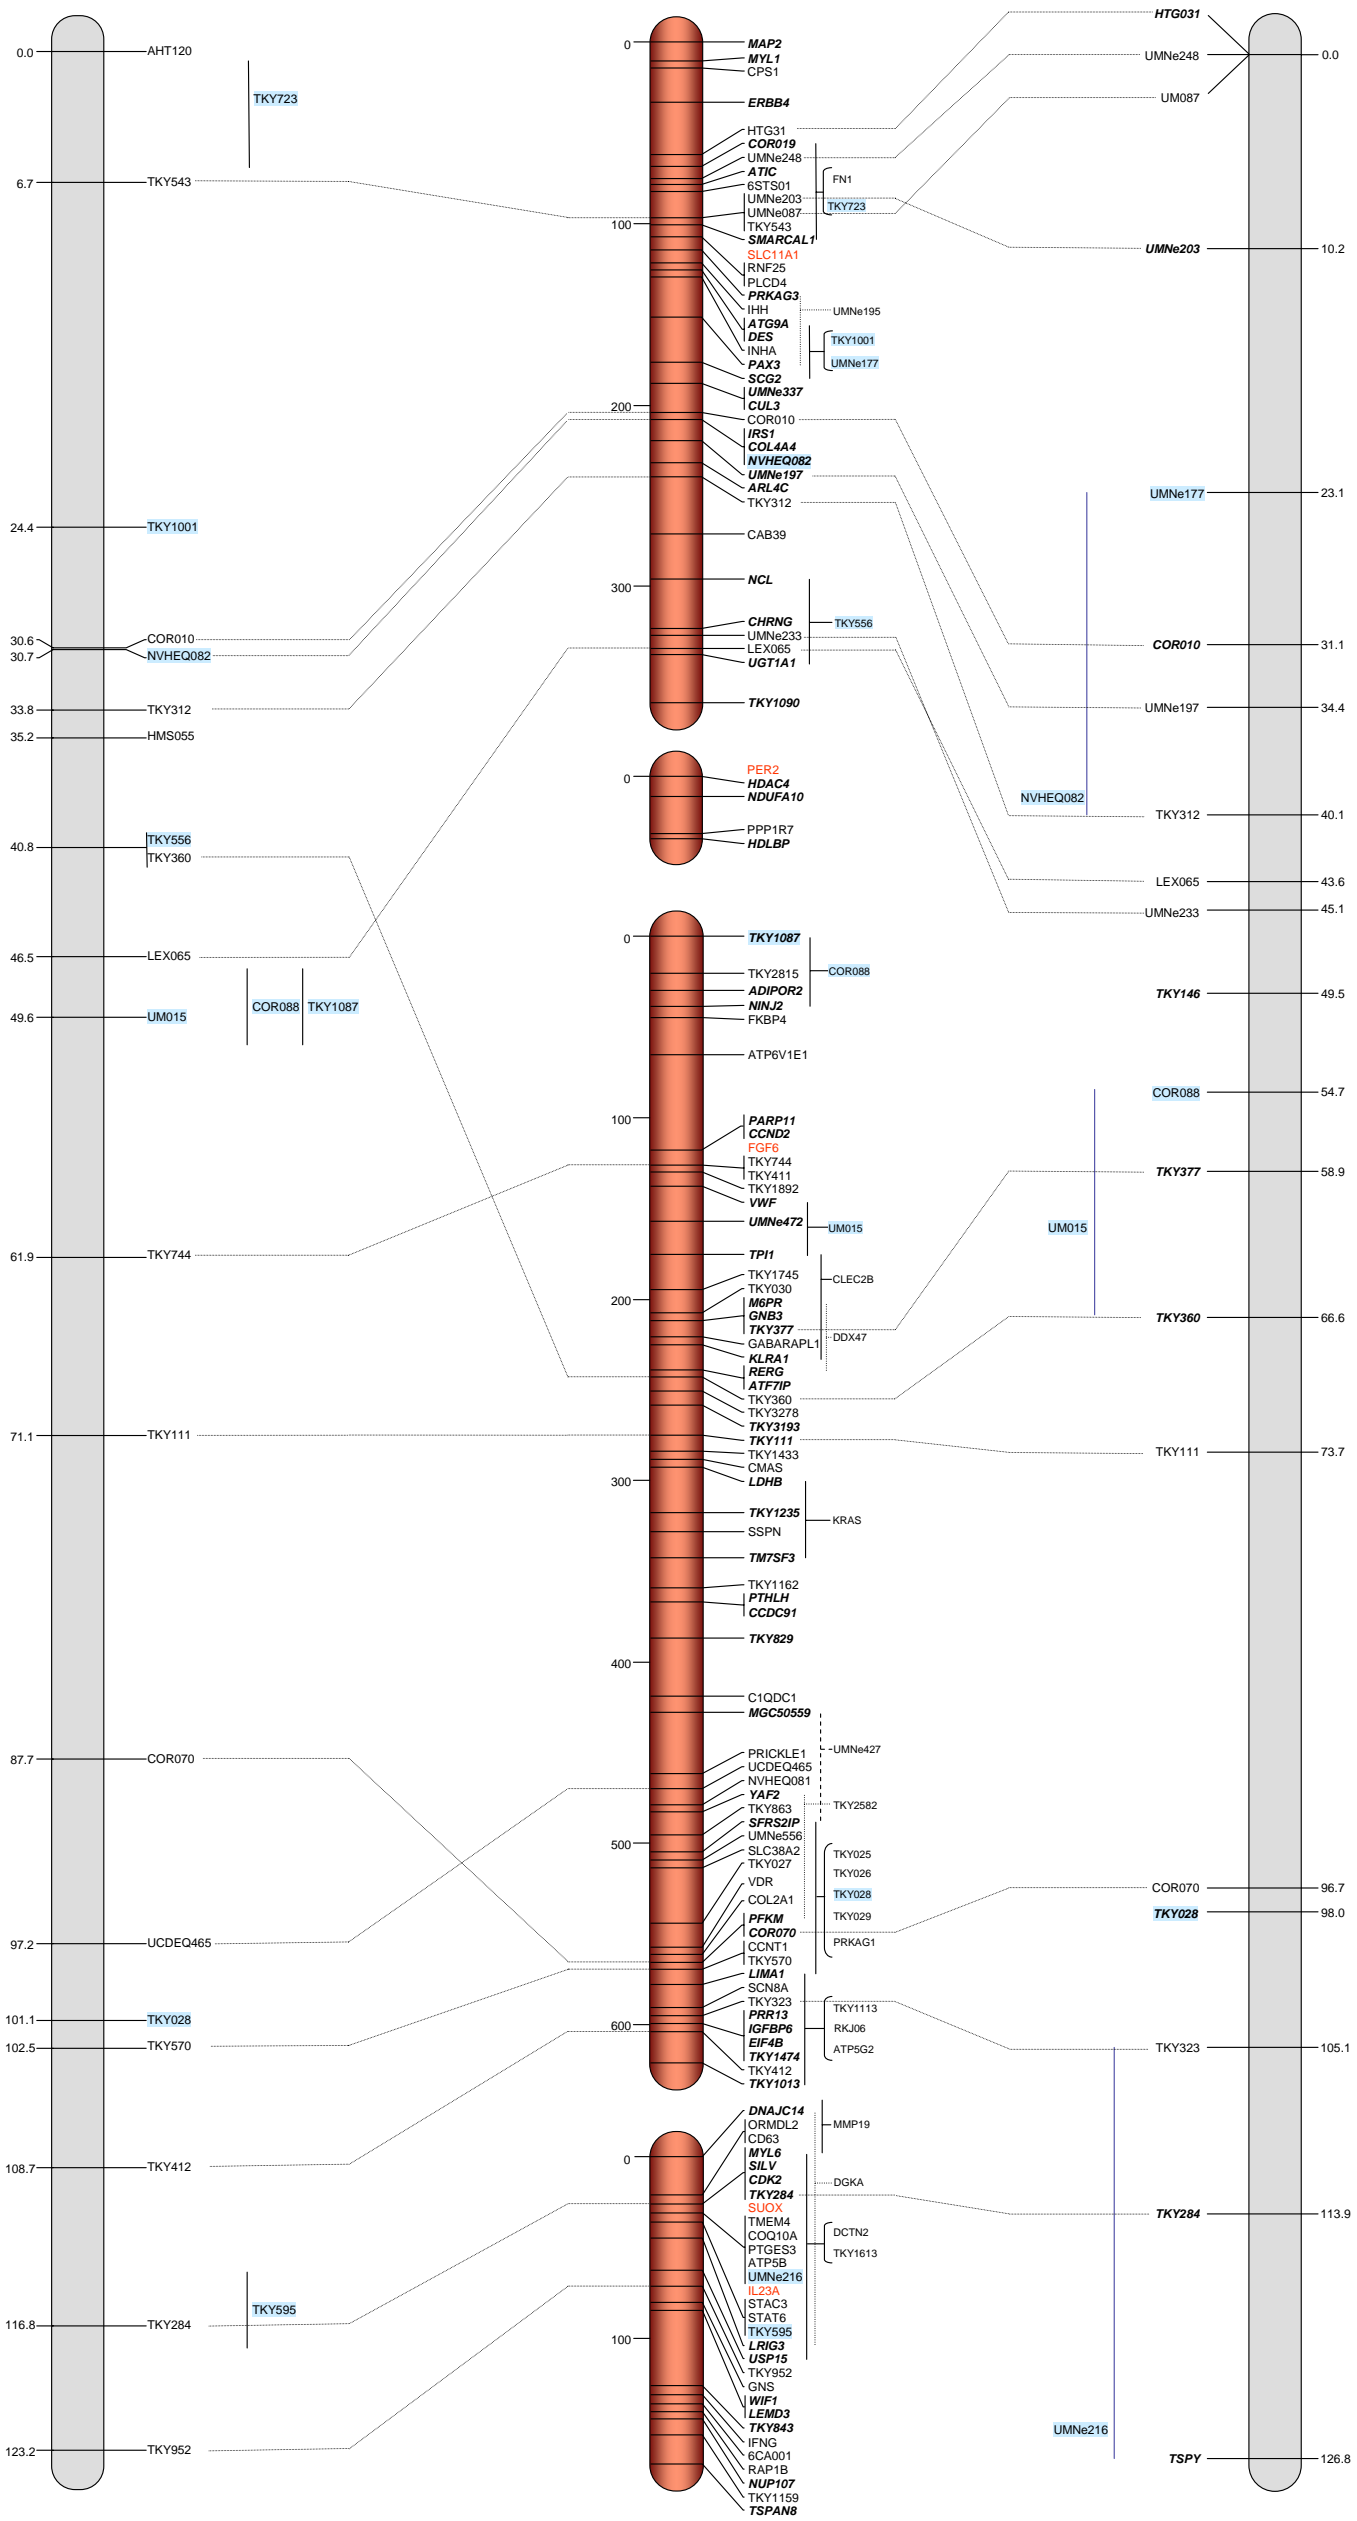



ECA7

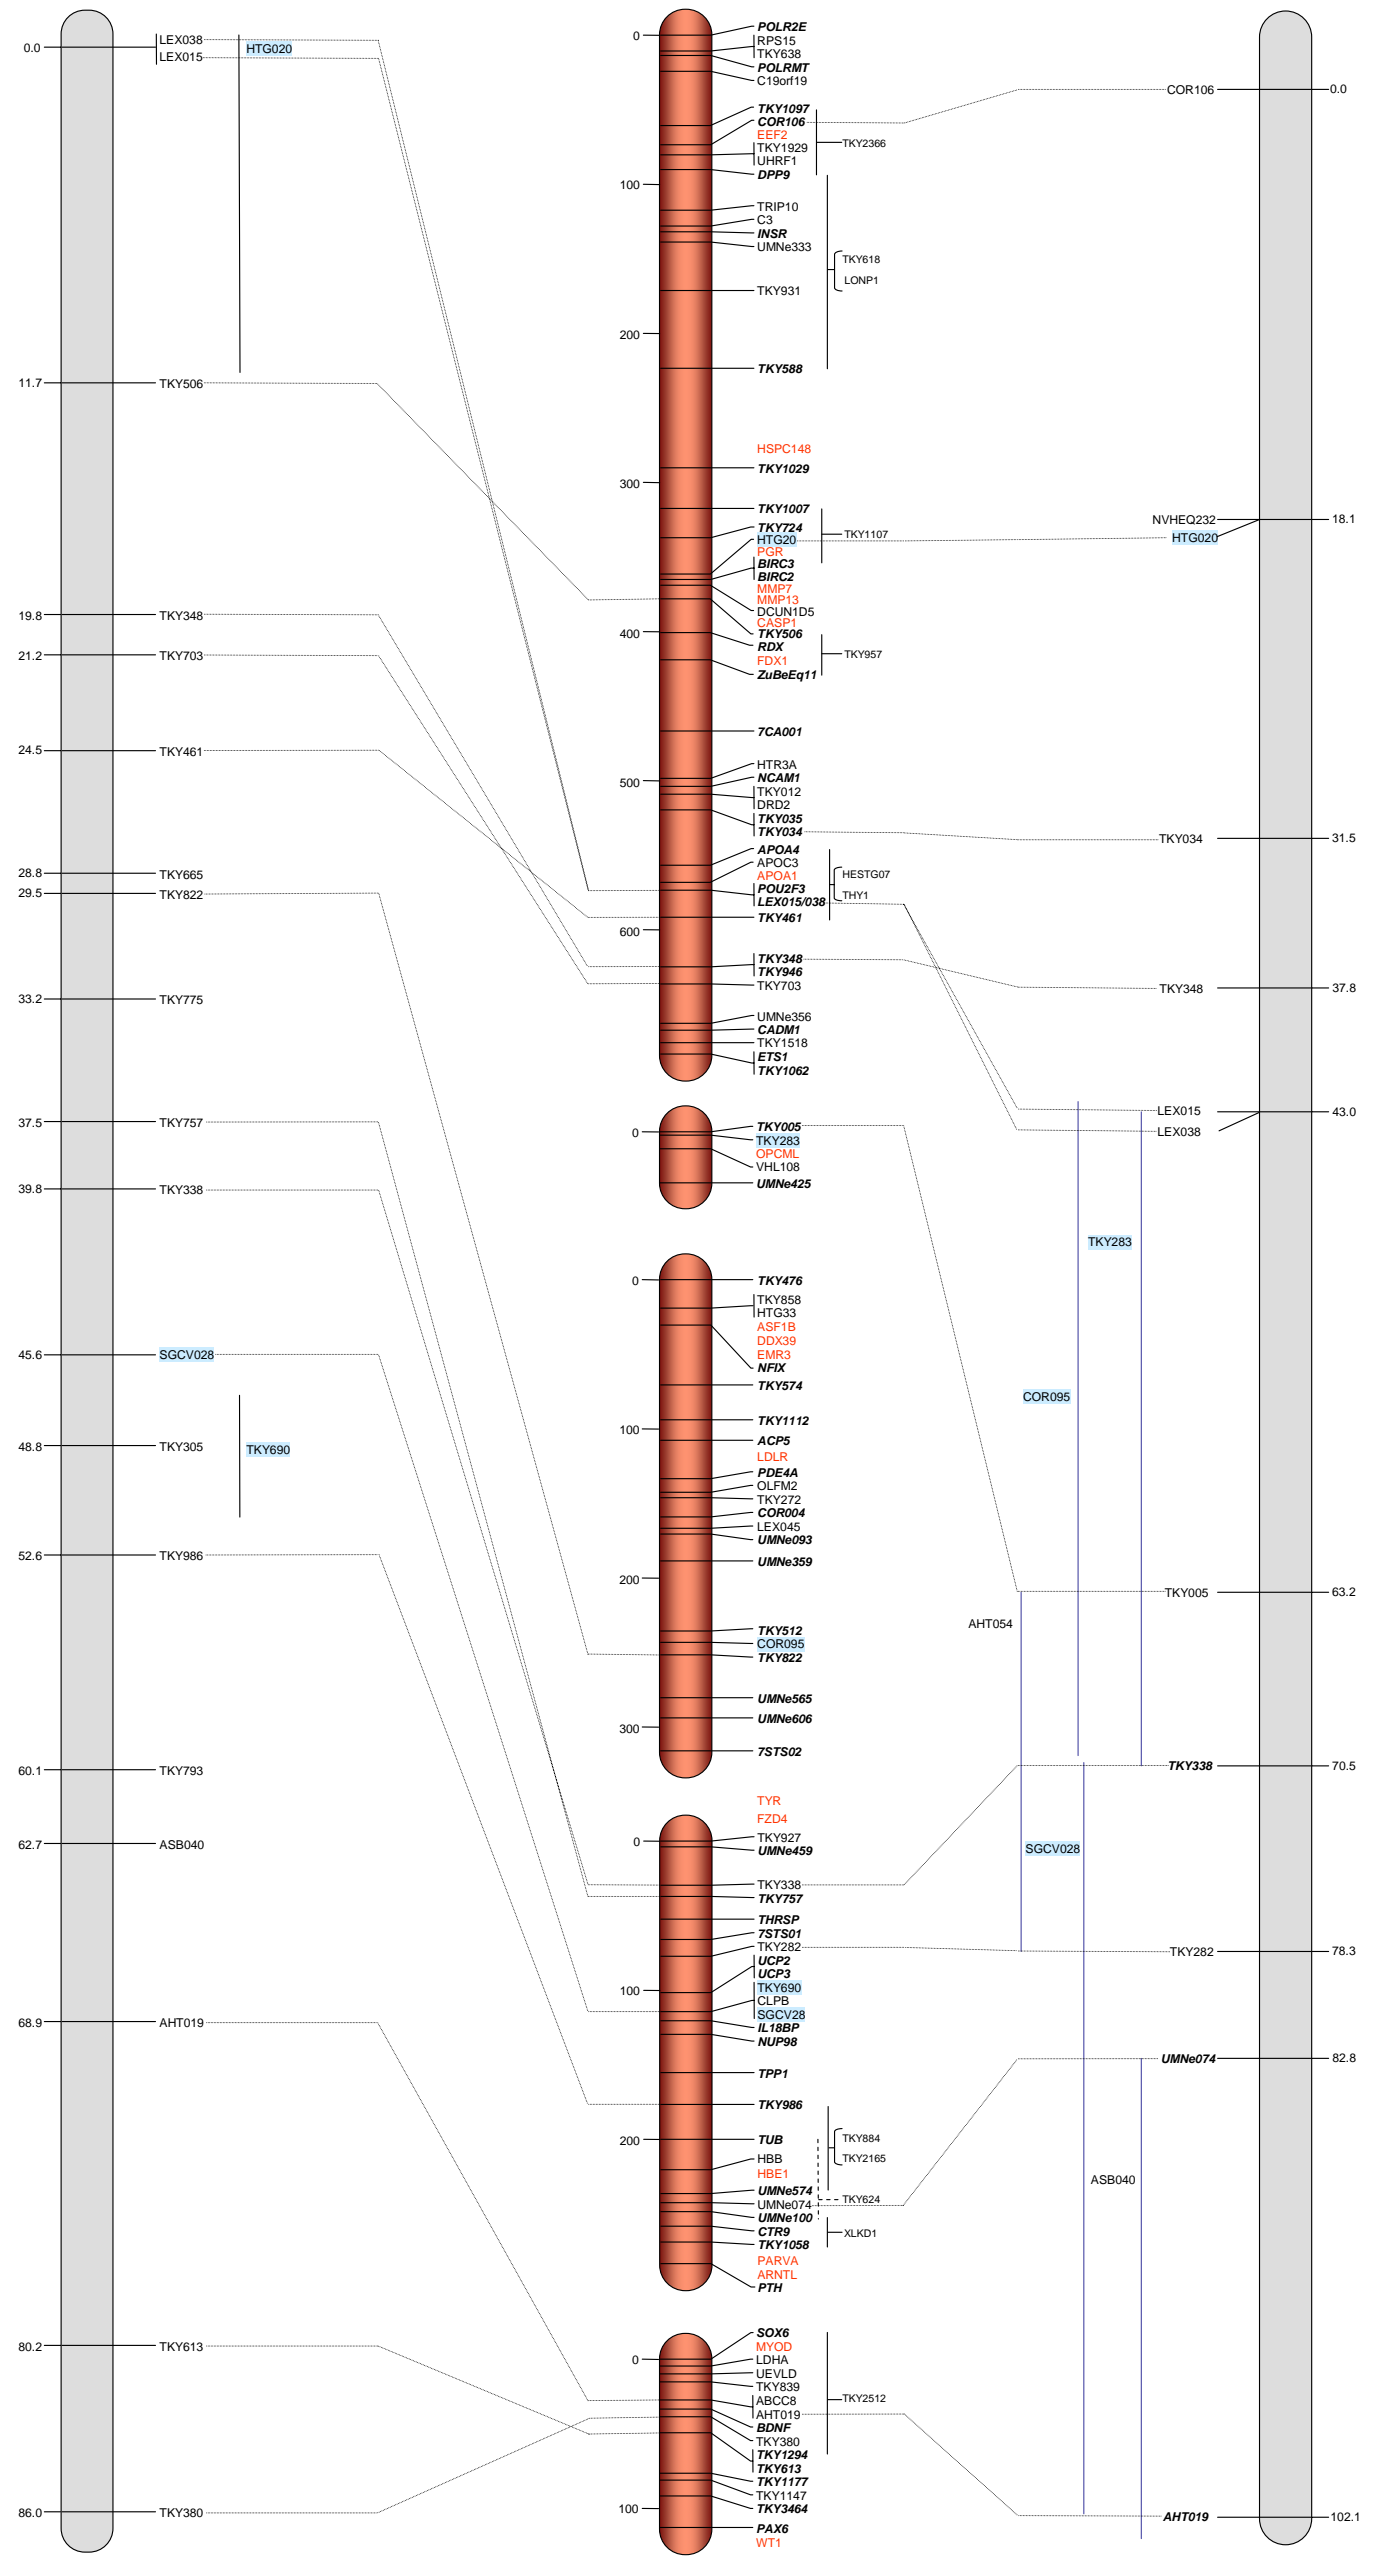



ECA8

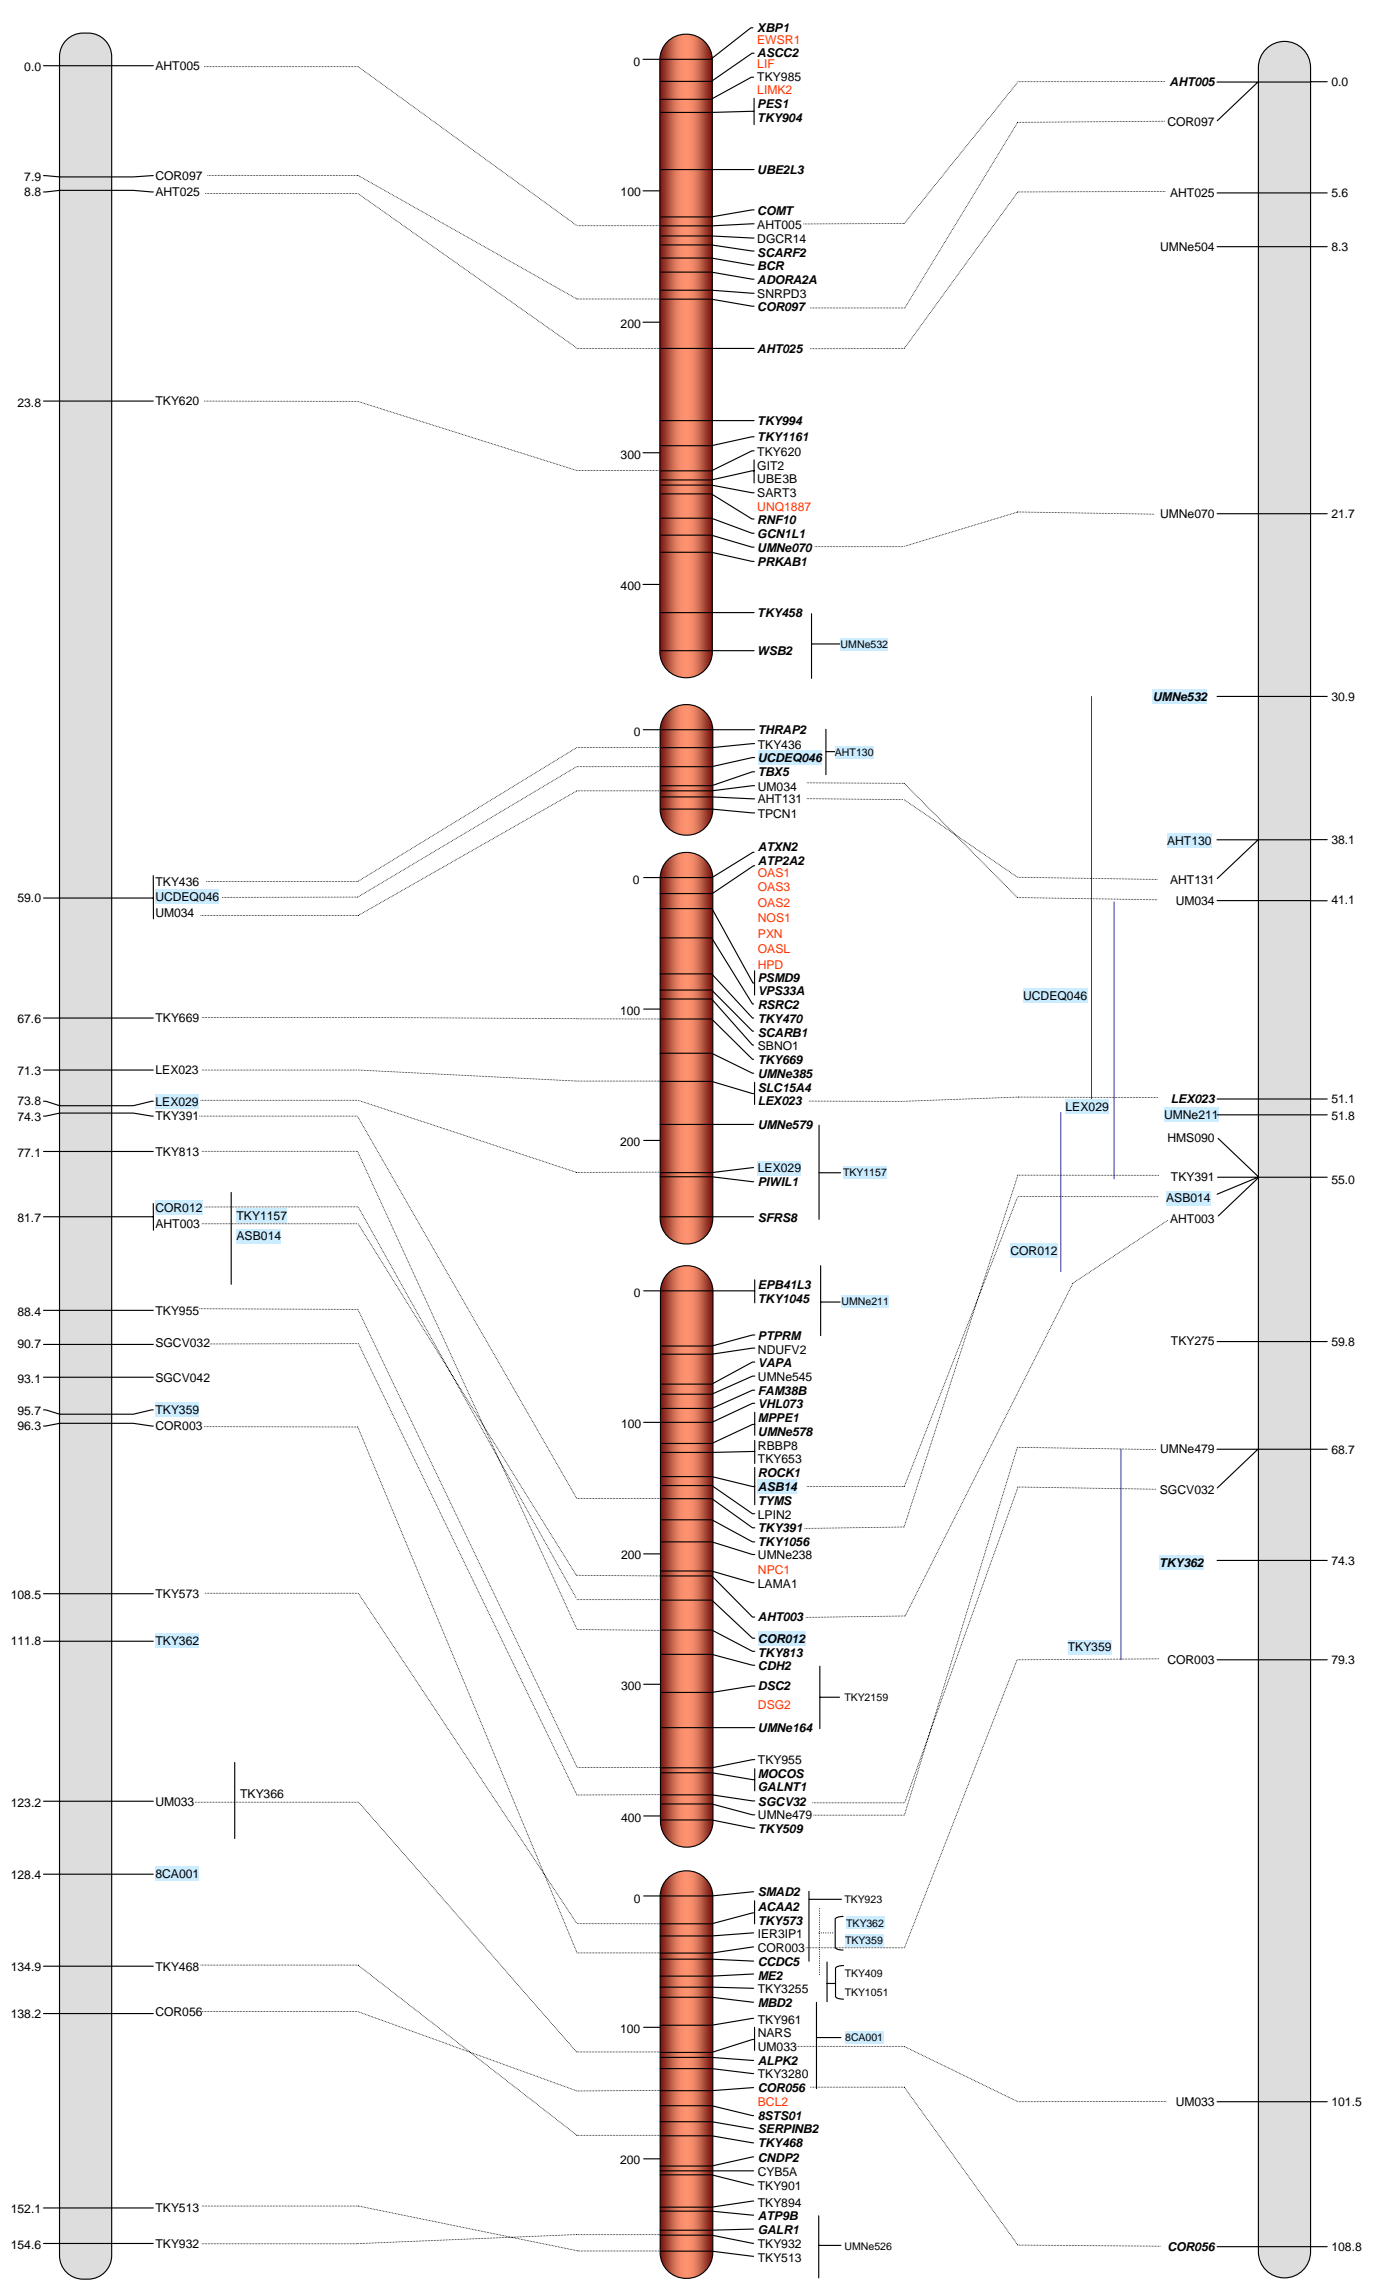

ECA9

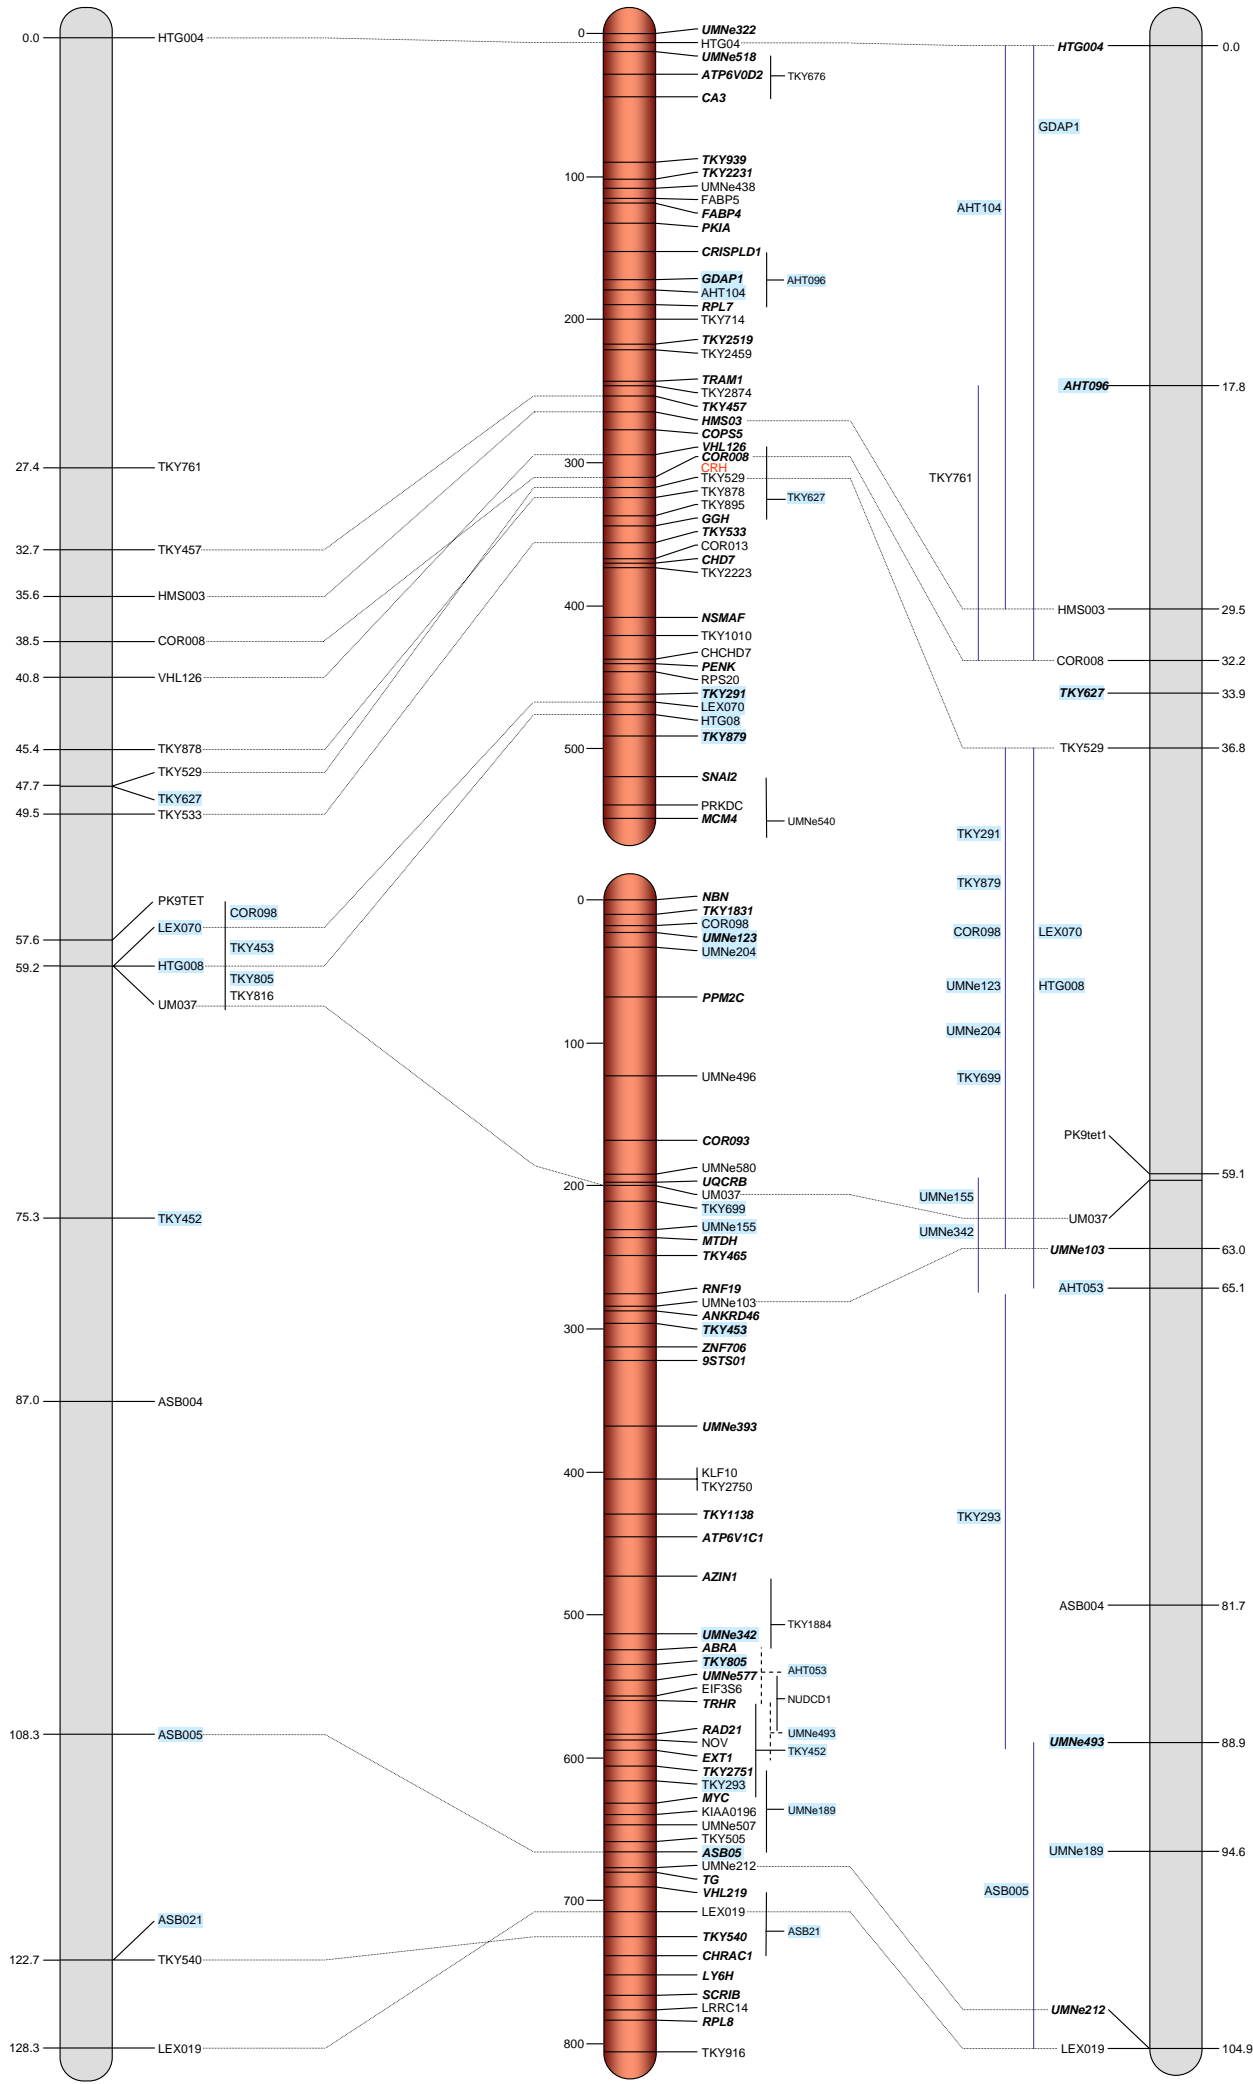

ECA10

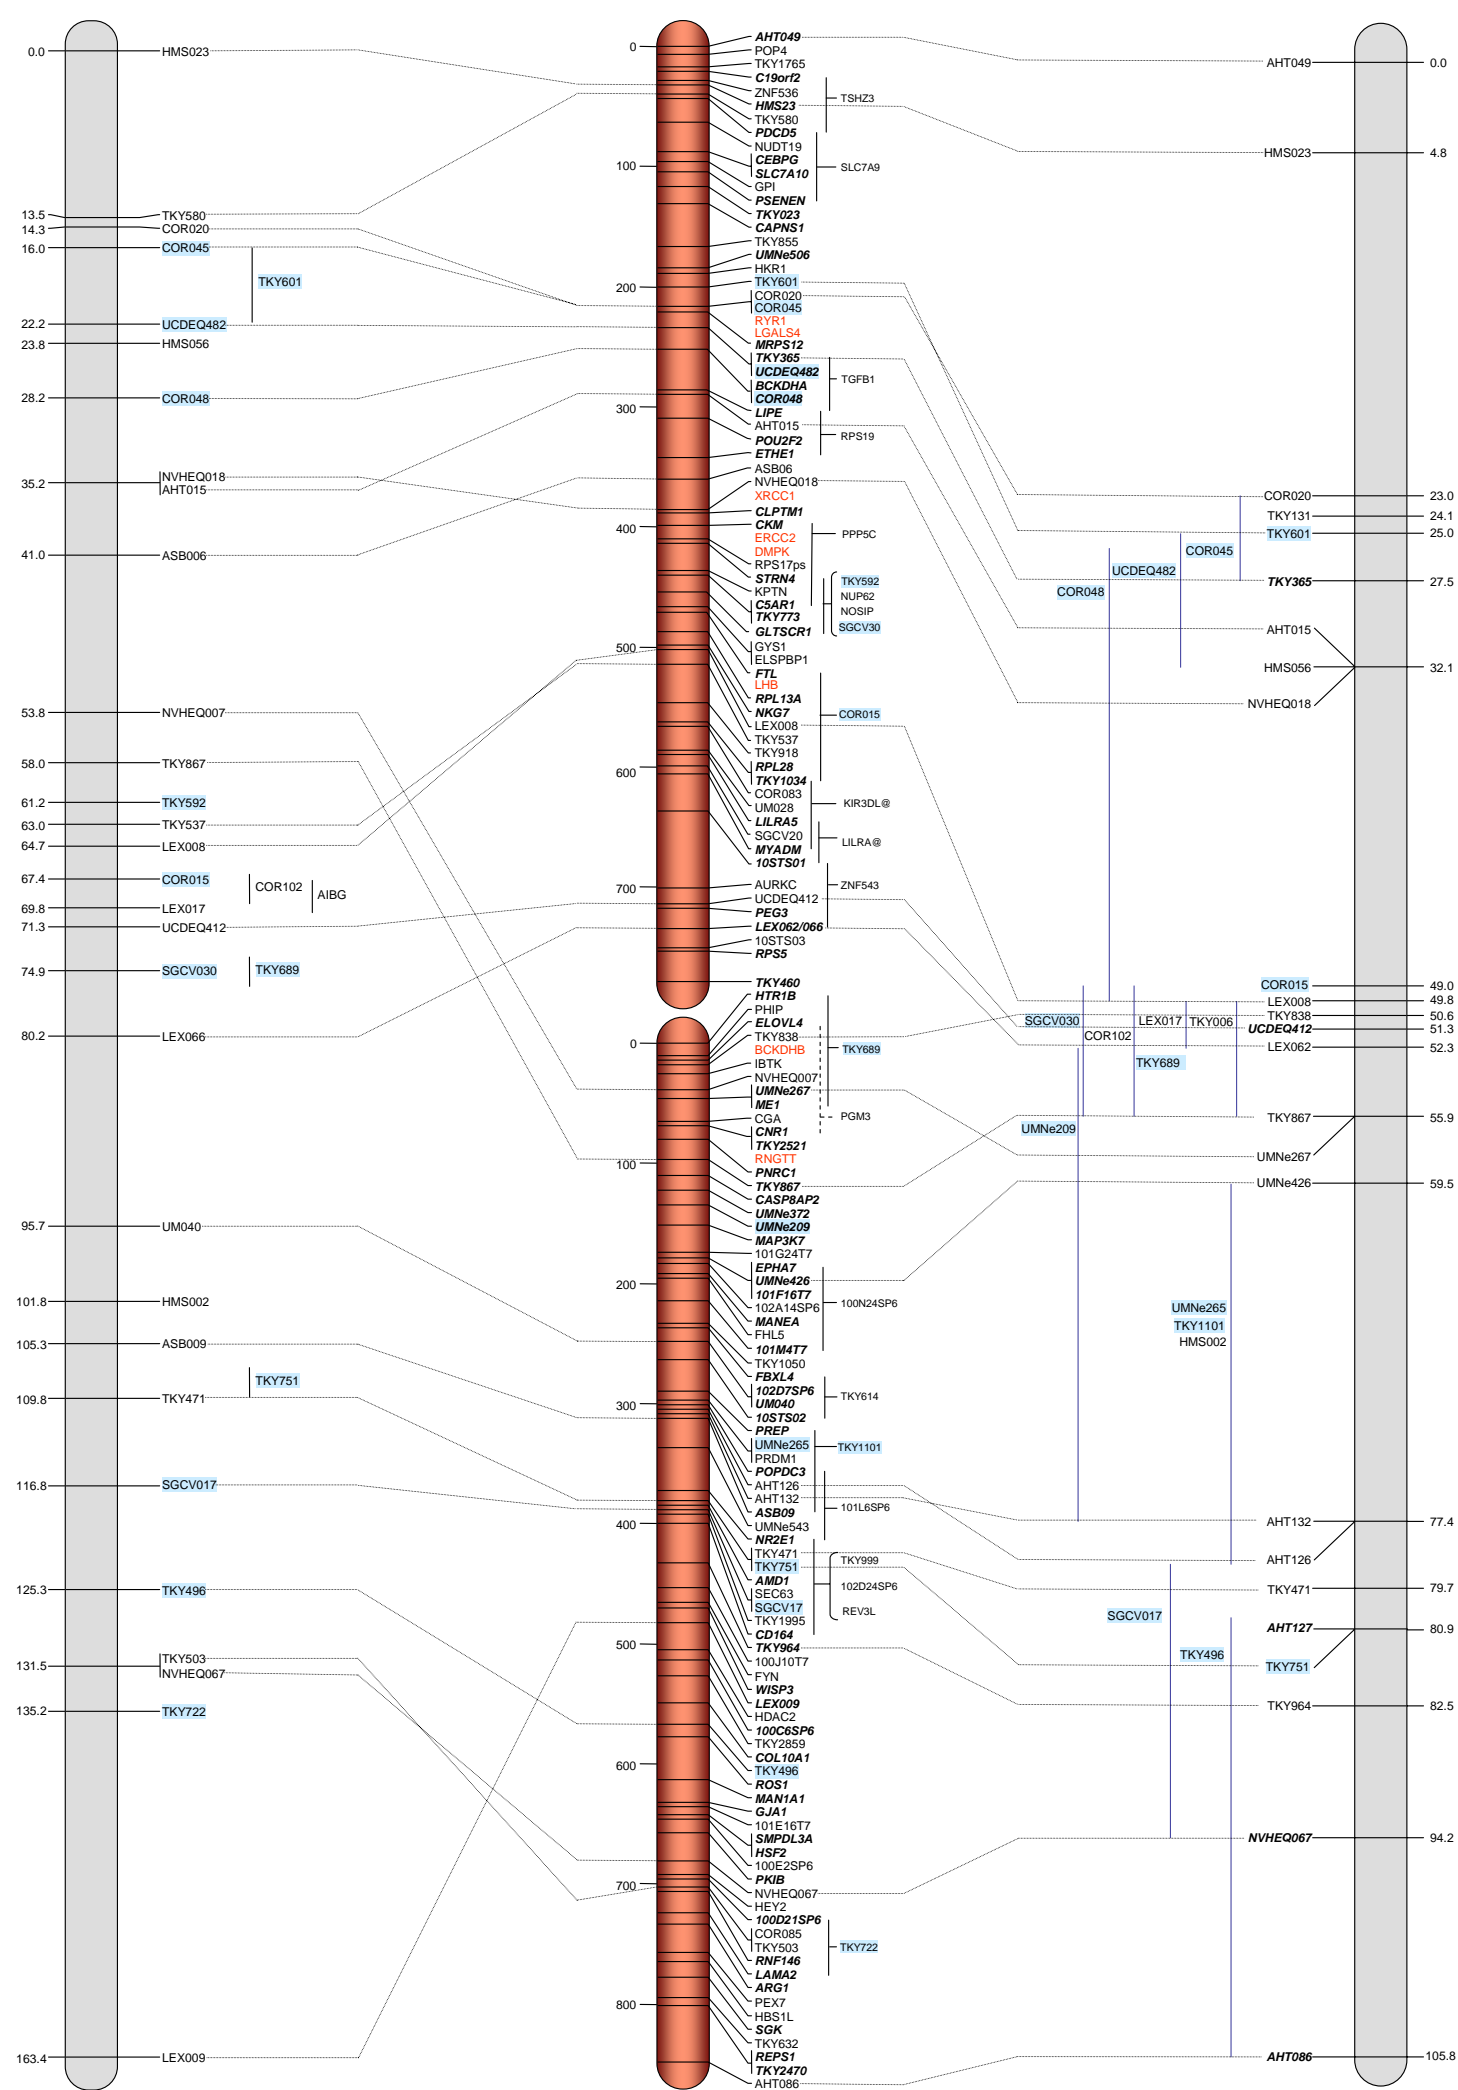

ECA11

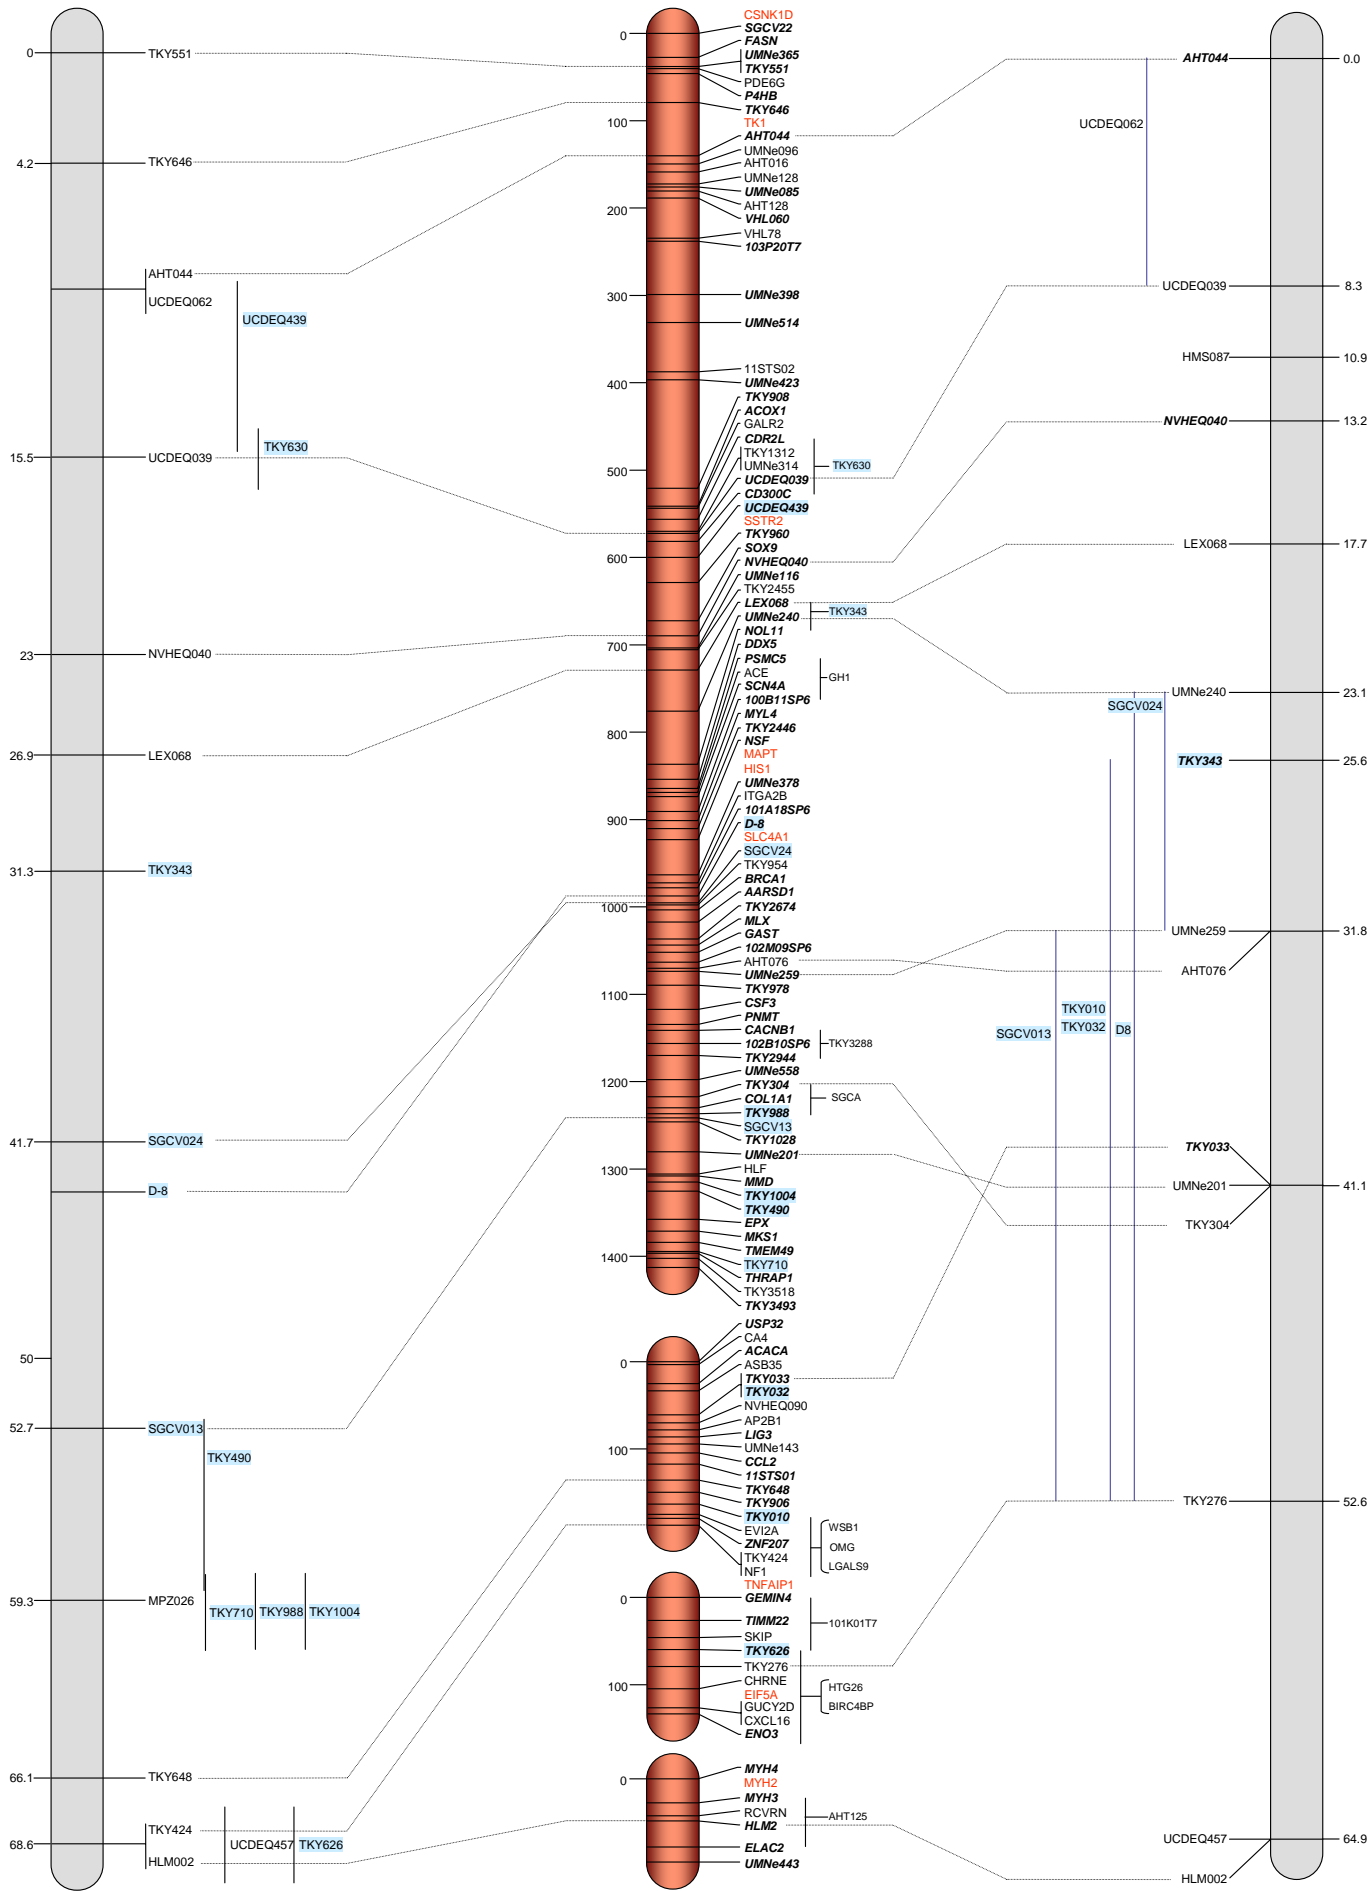

ECA12

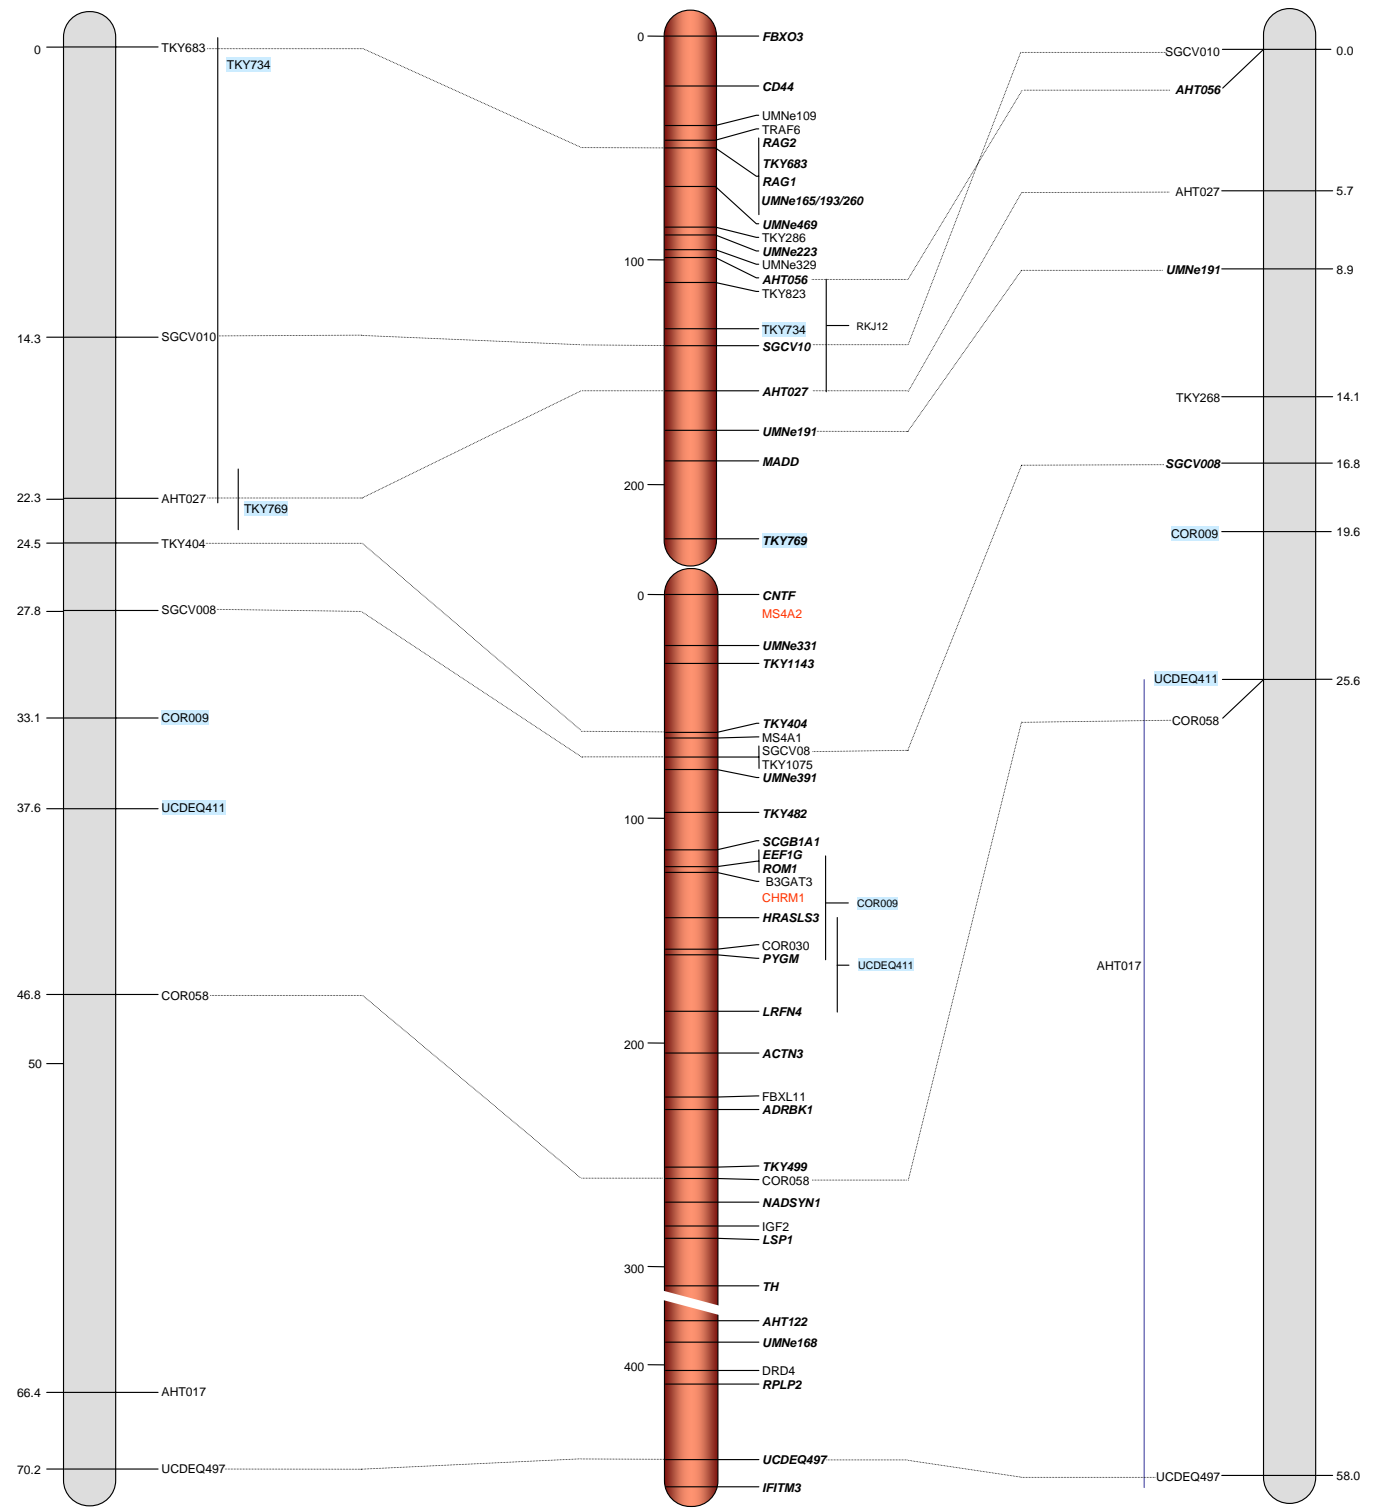

ECA13

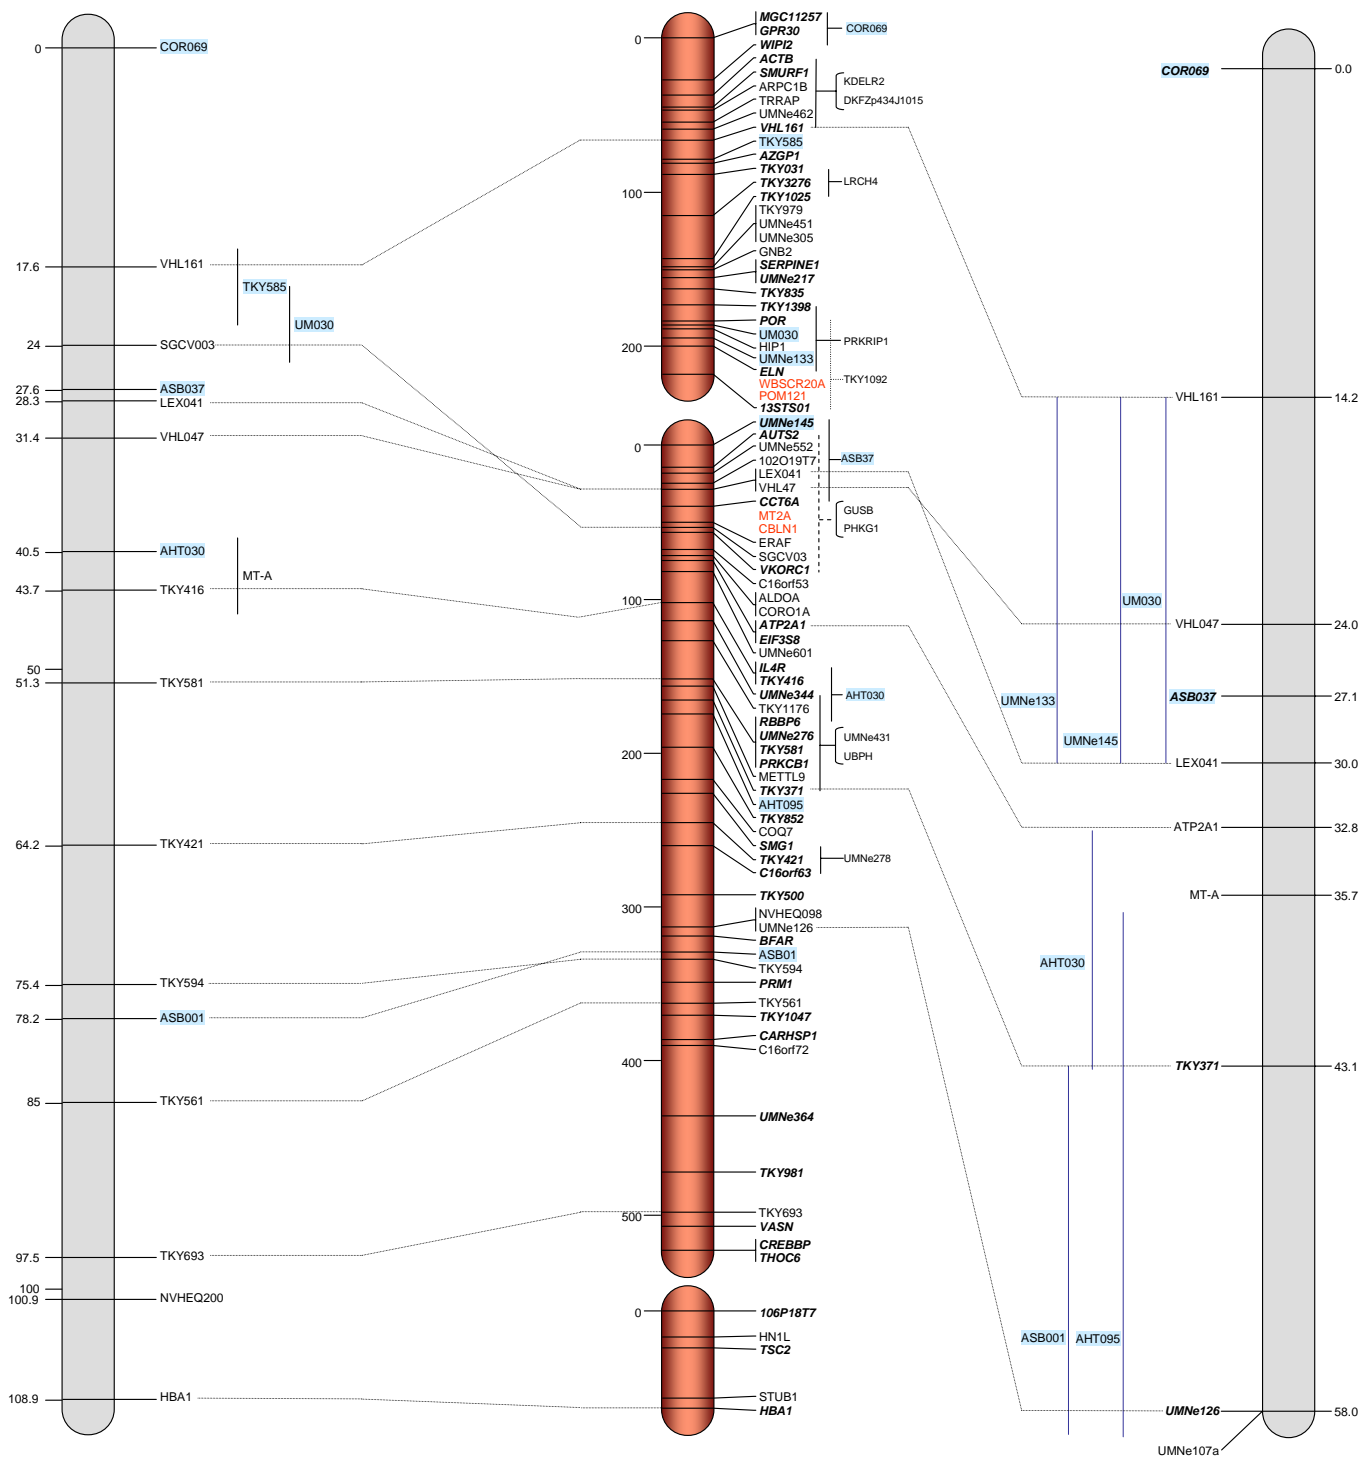

ECA14

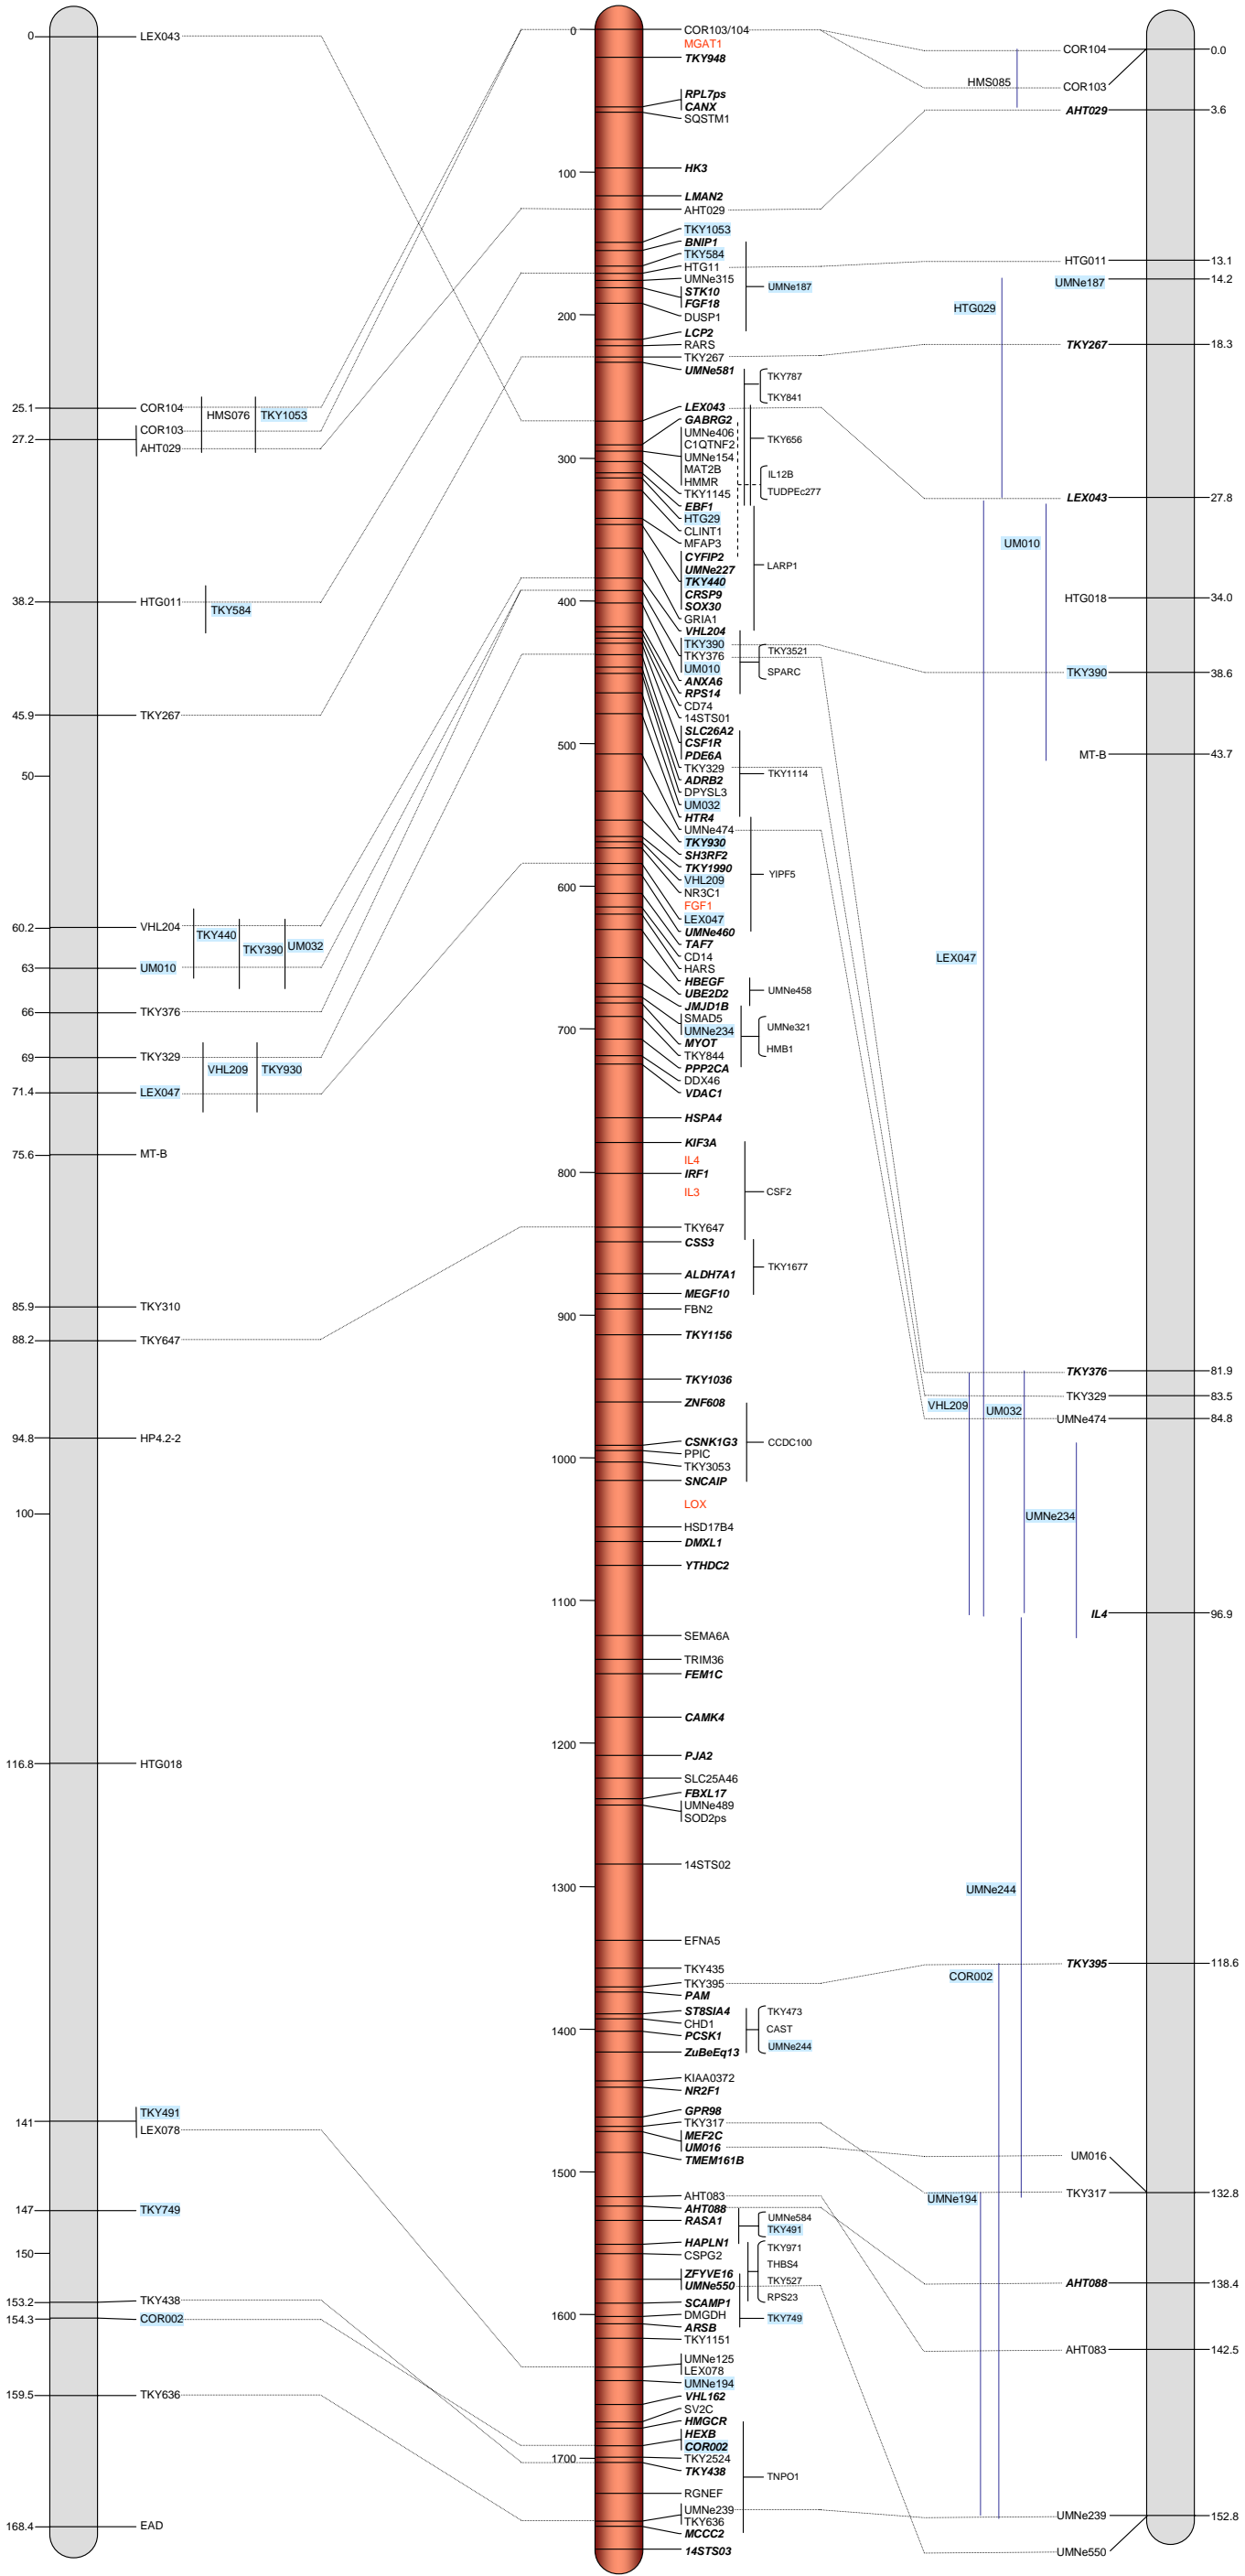



ECA15

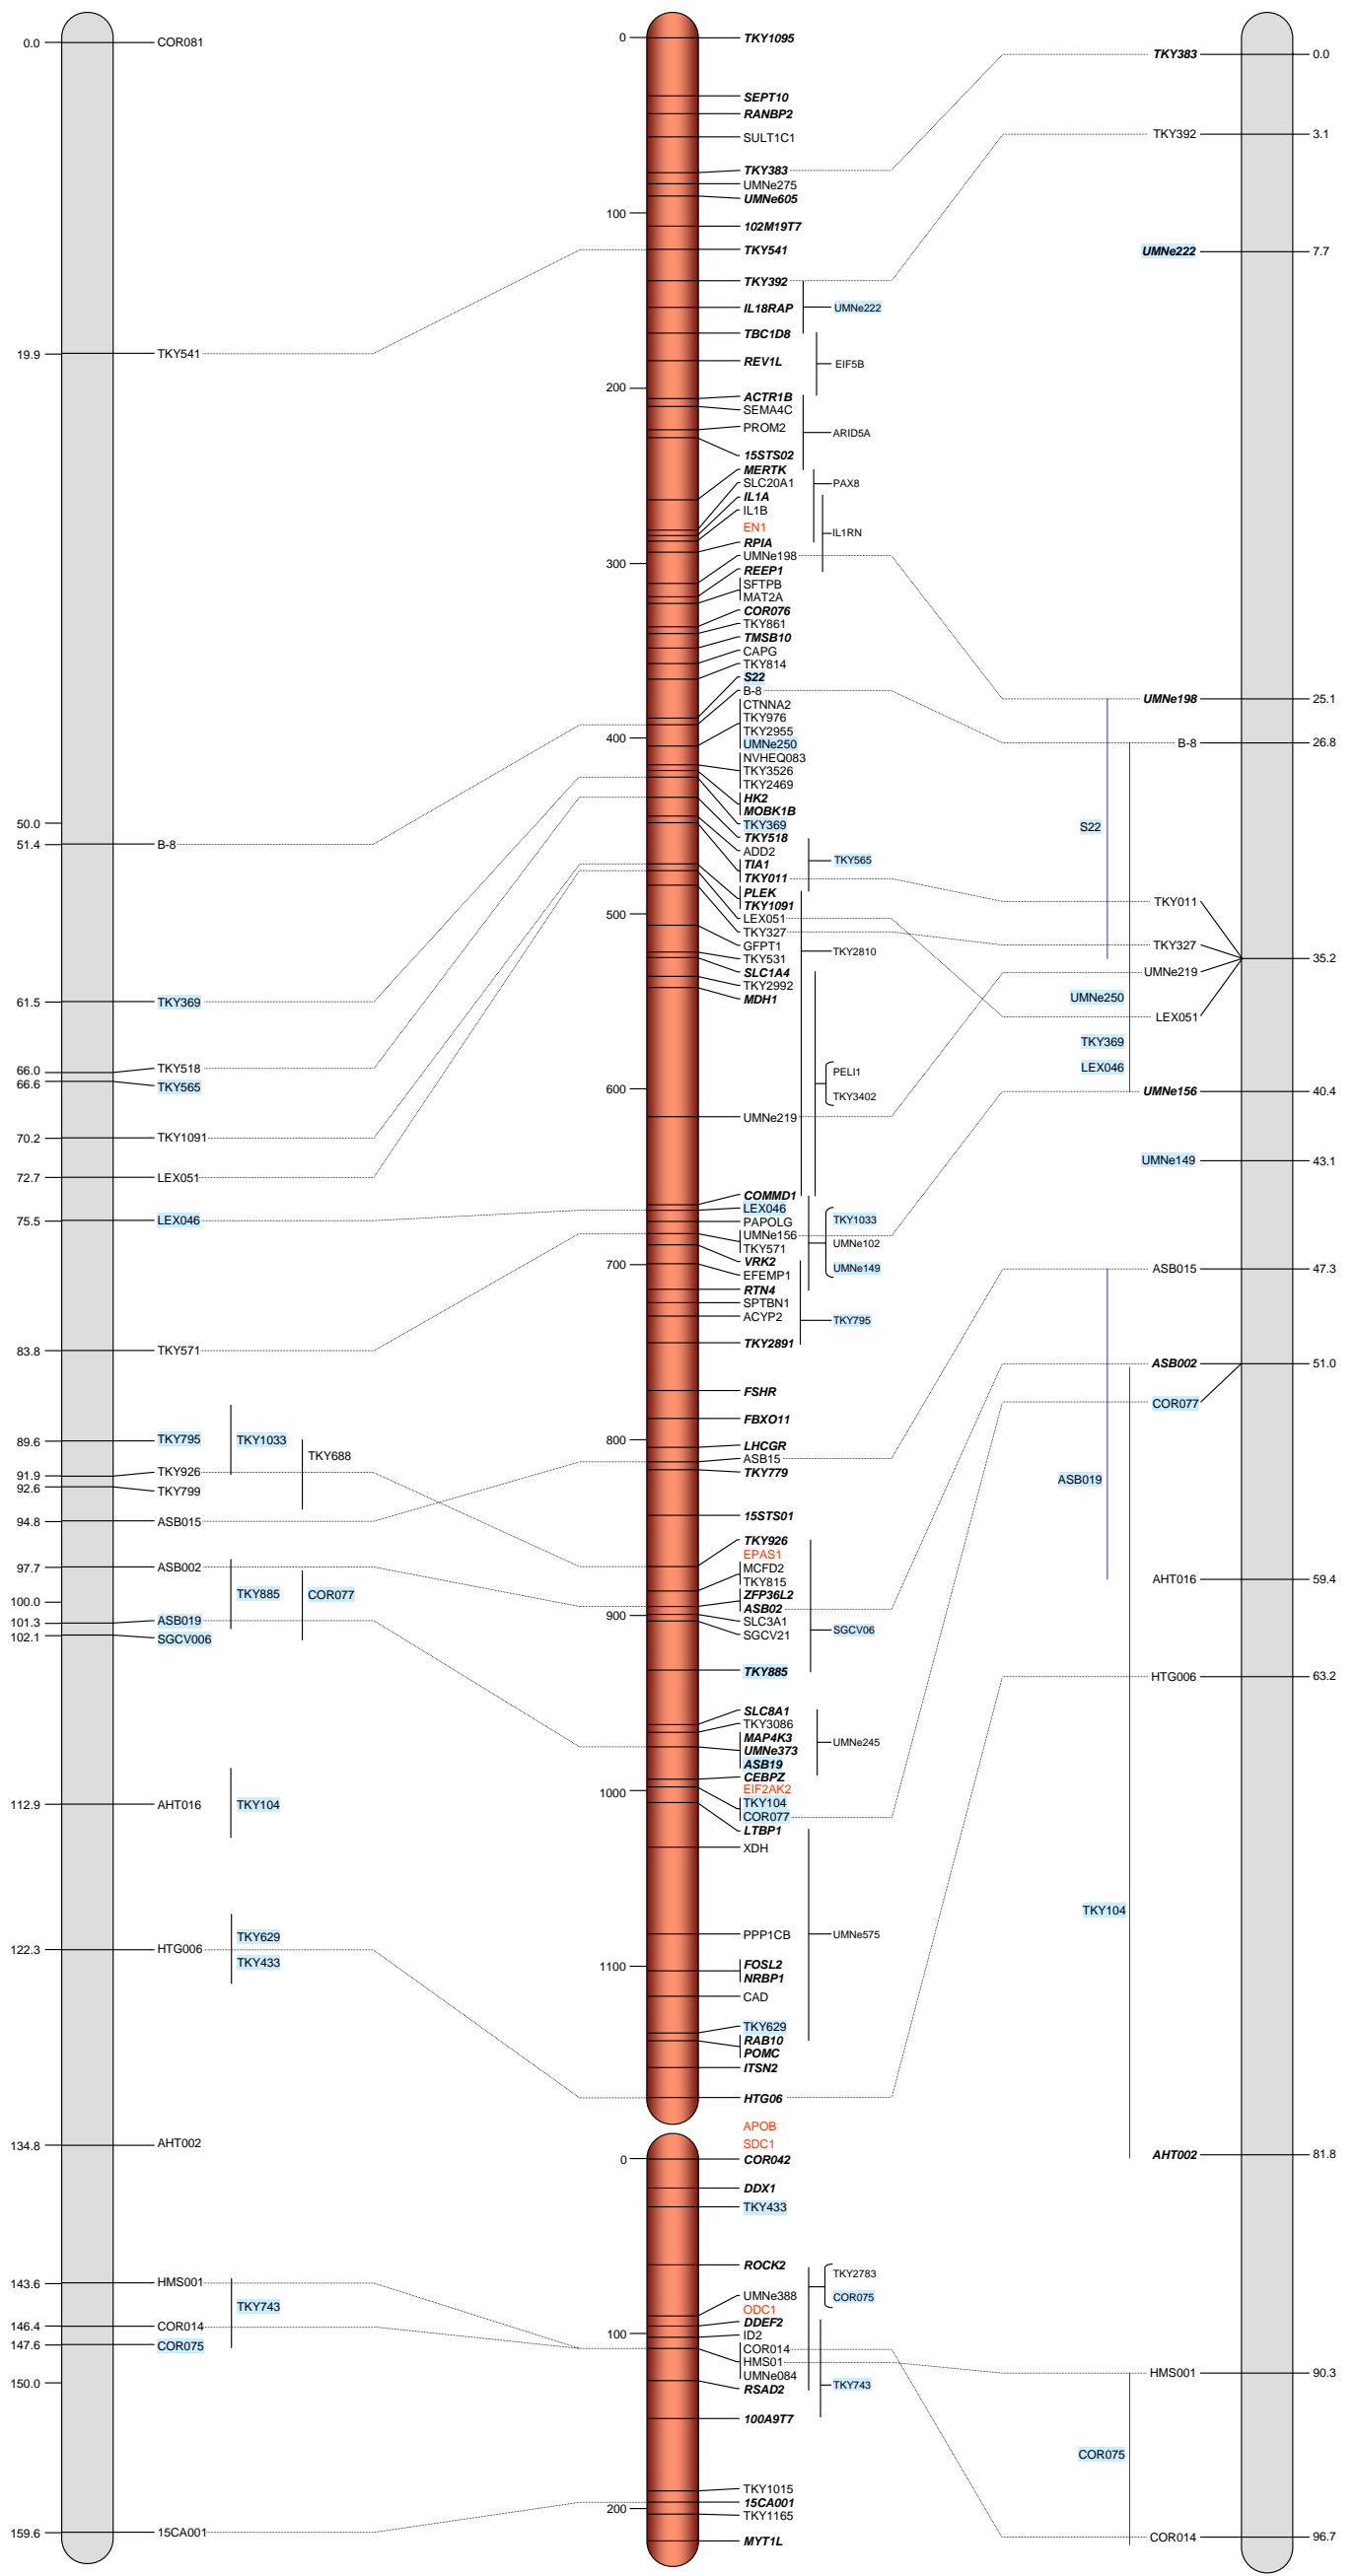

ECA16

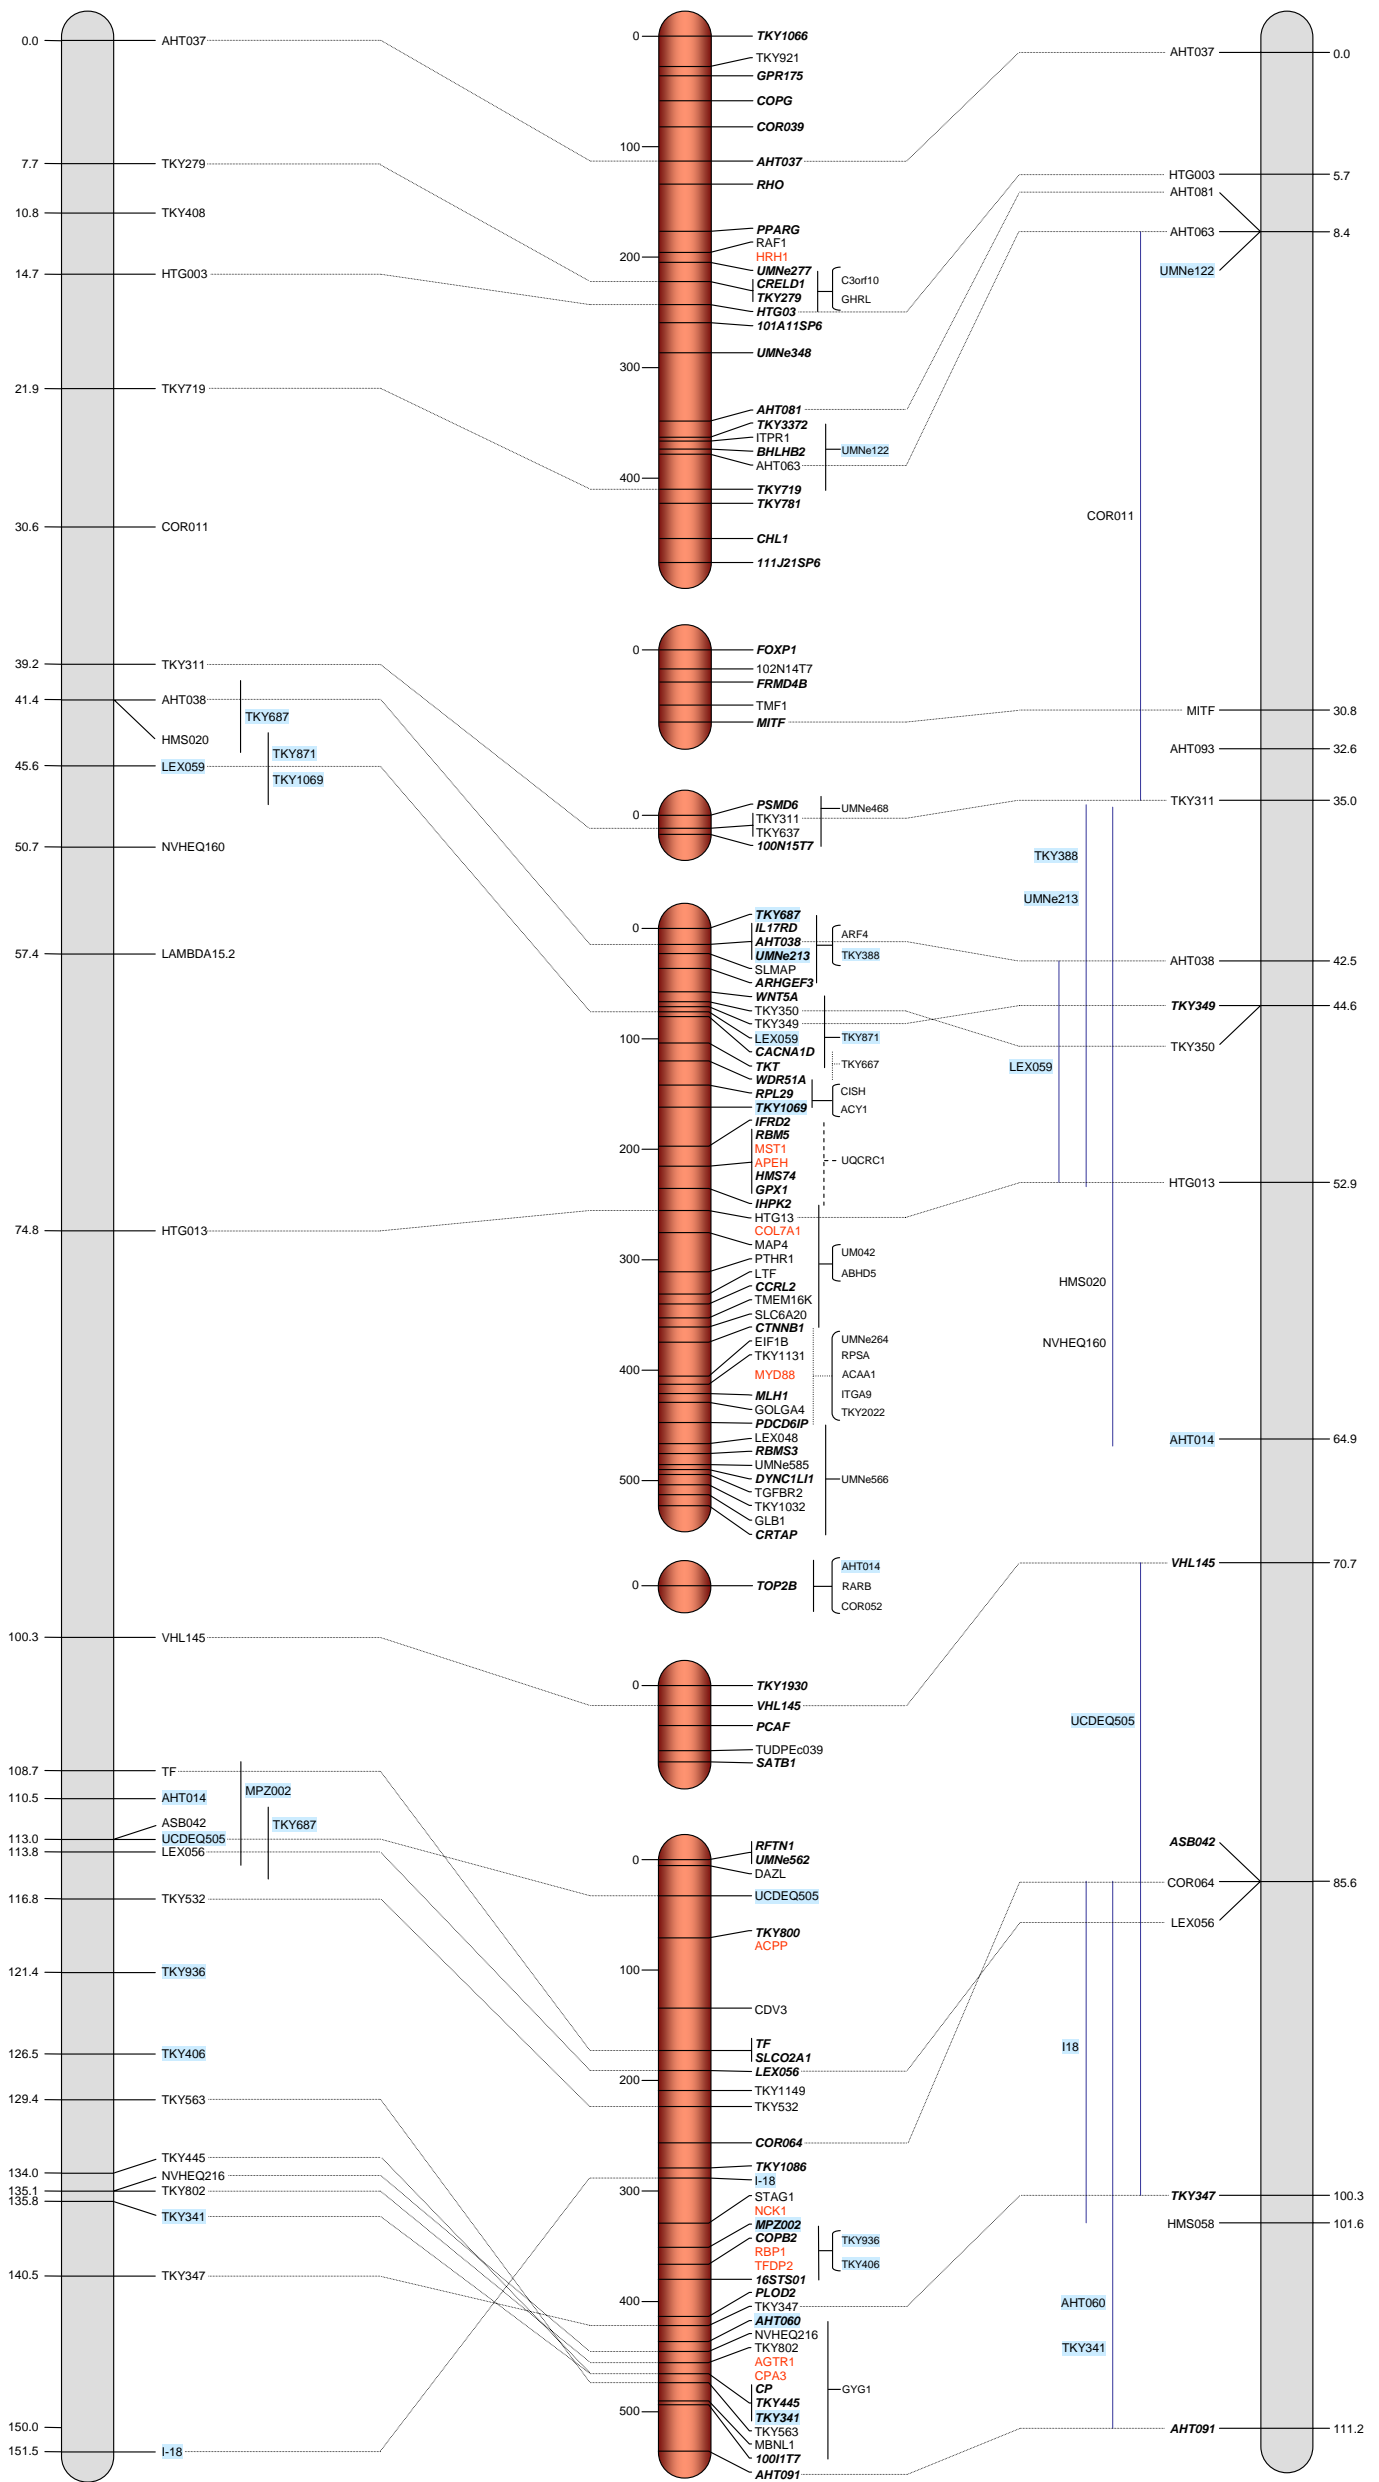

ECA17

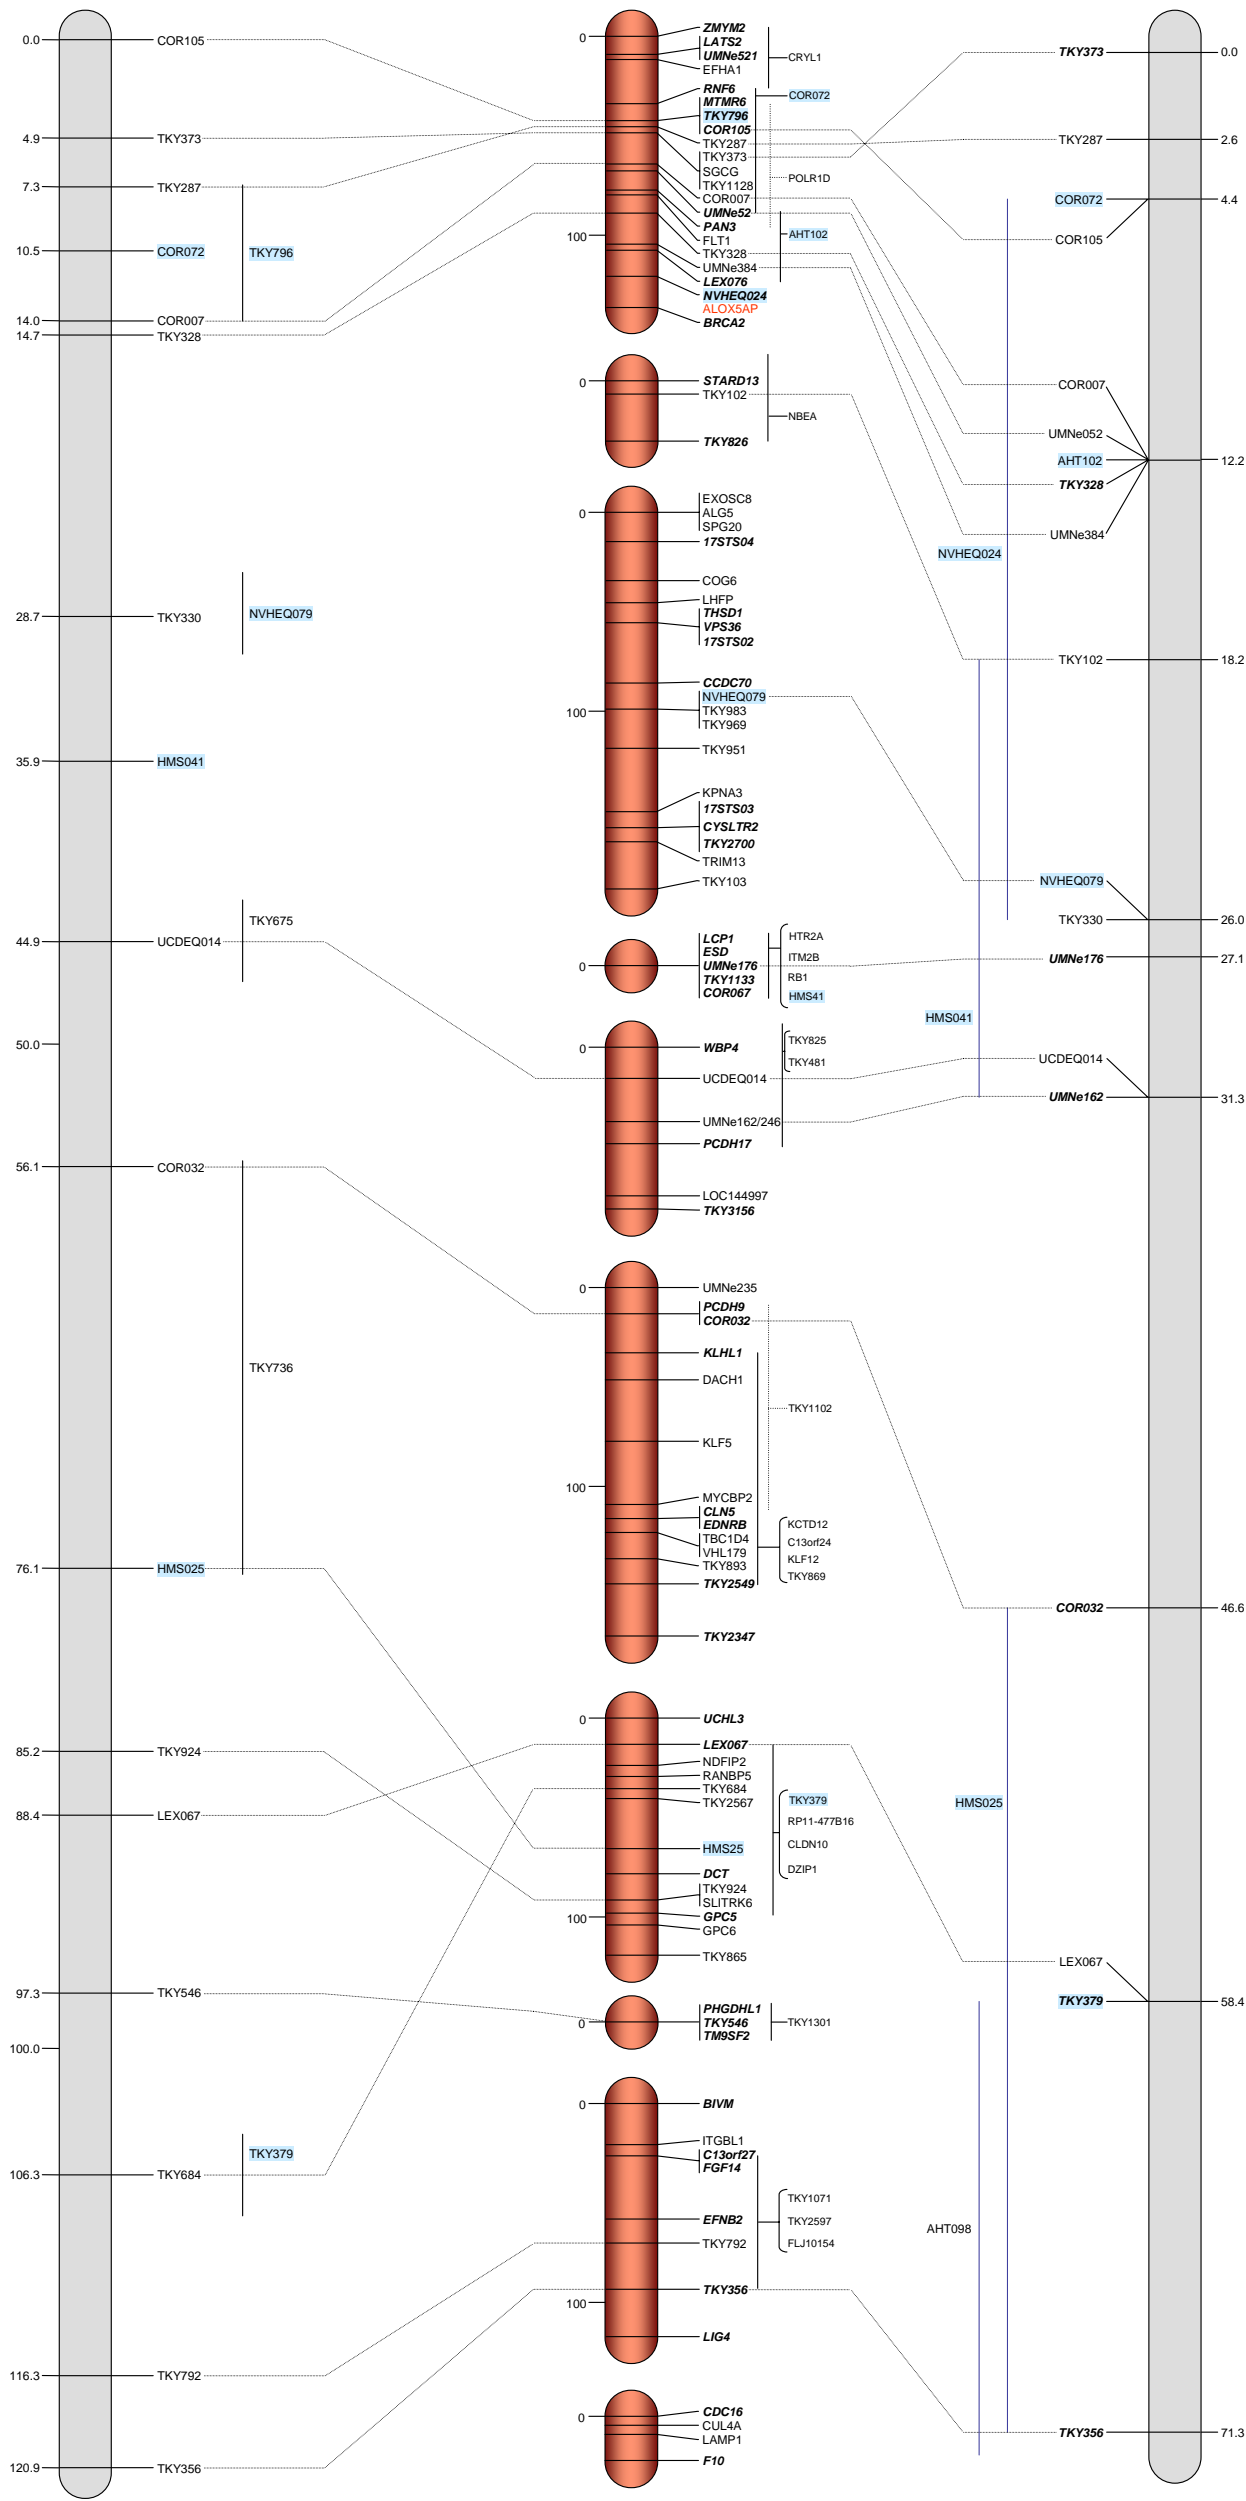

ECA18

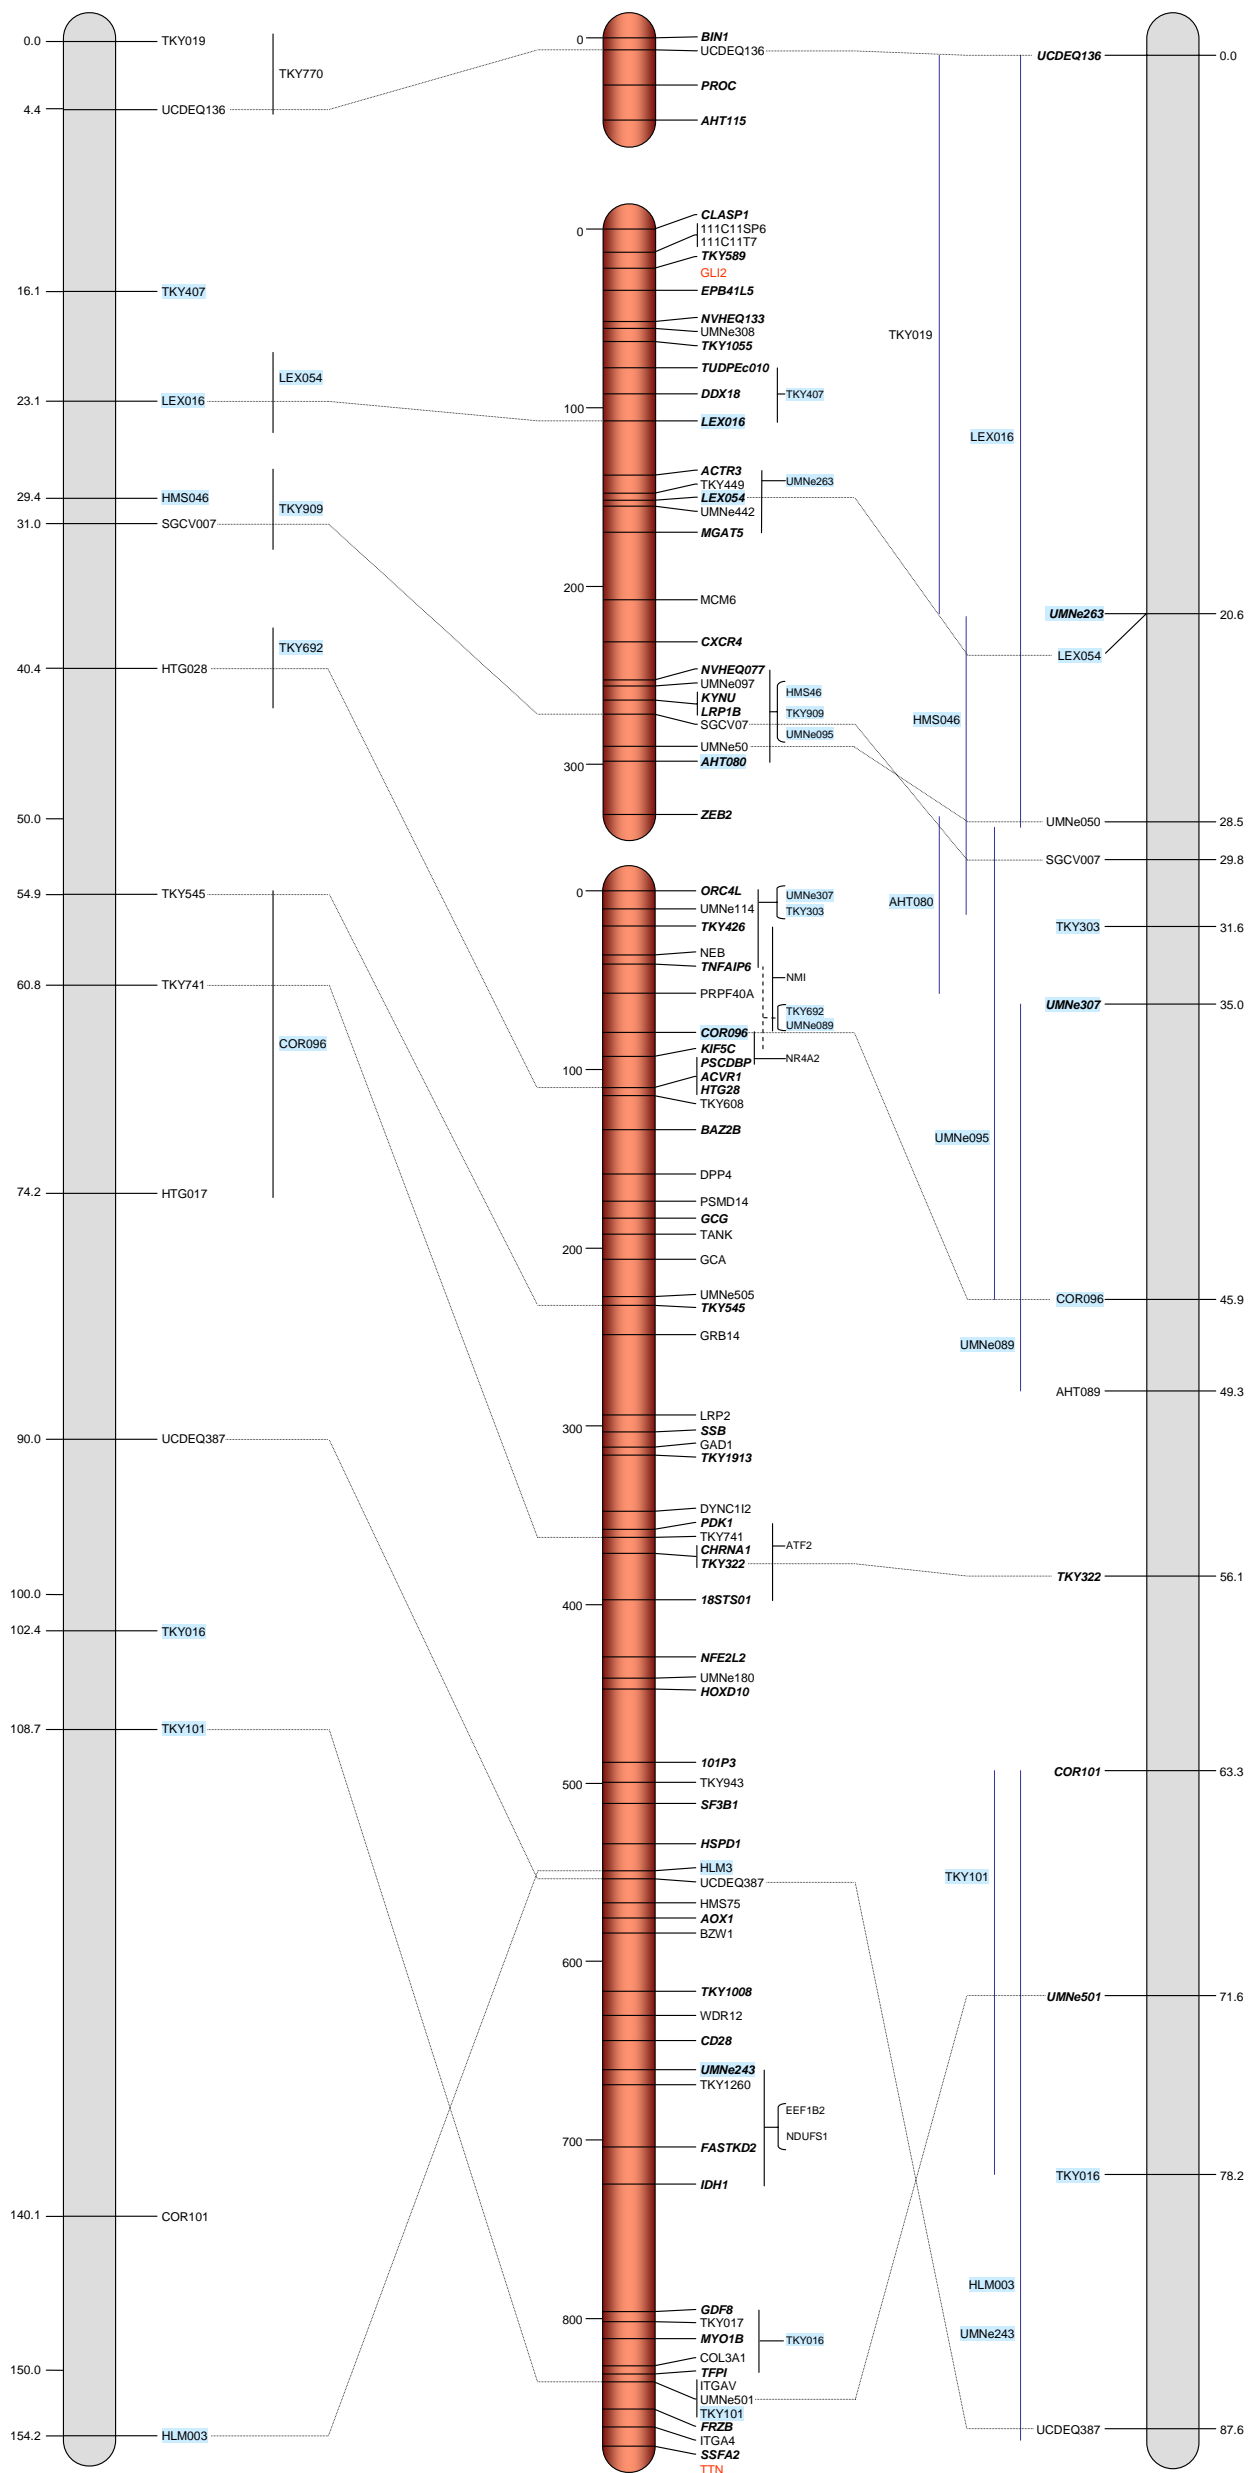

## ECA19

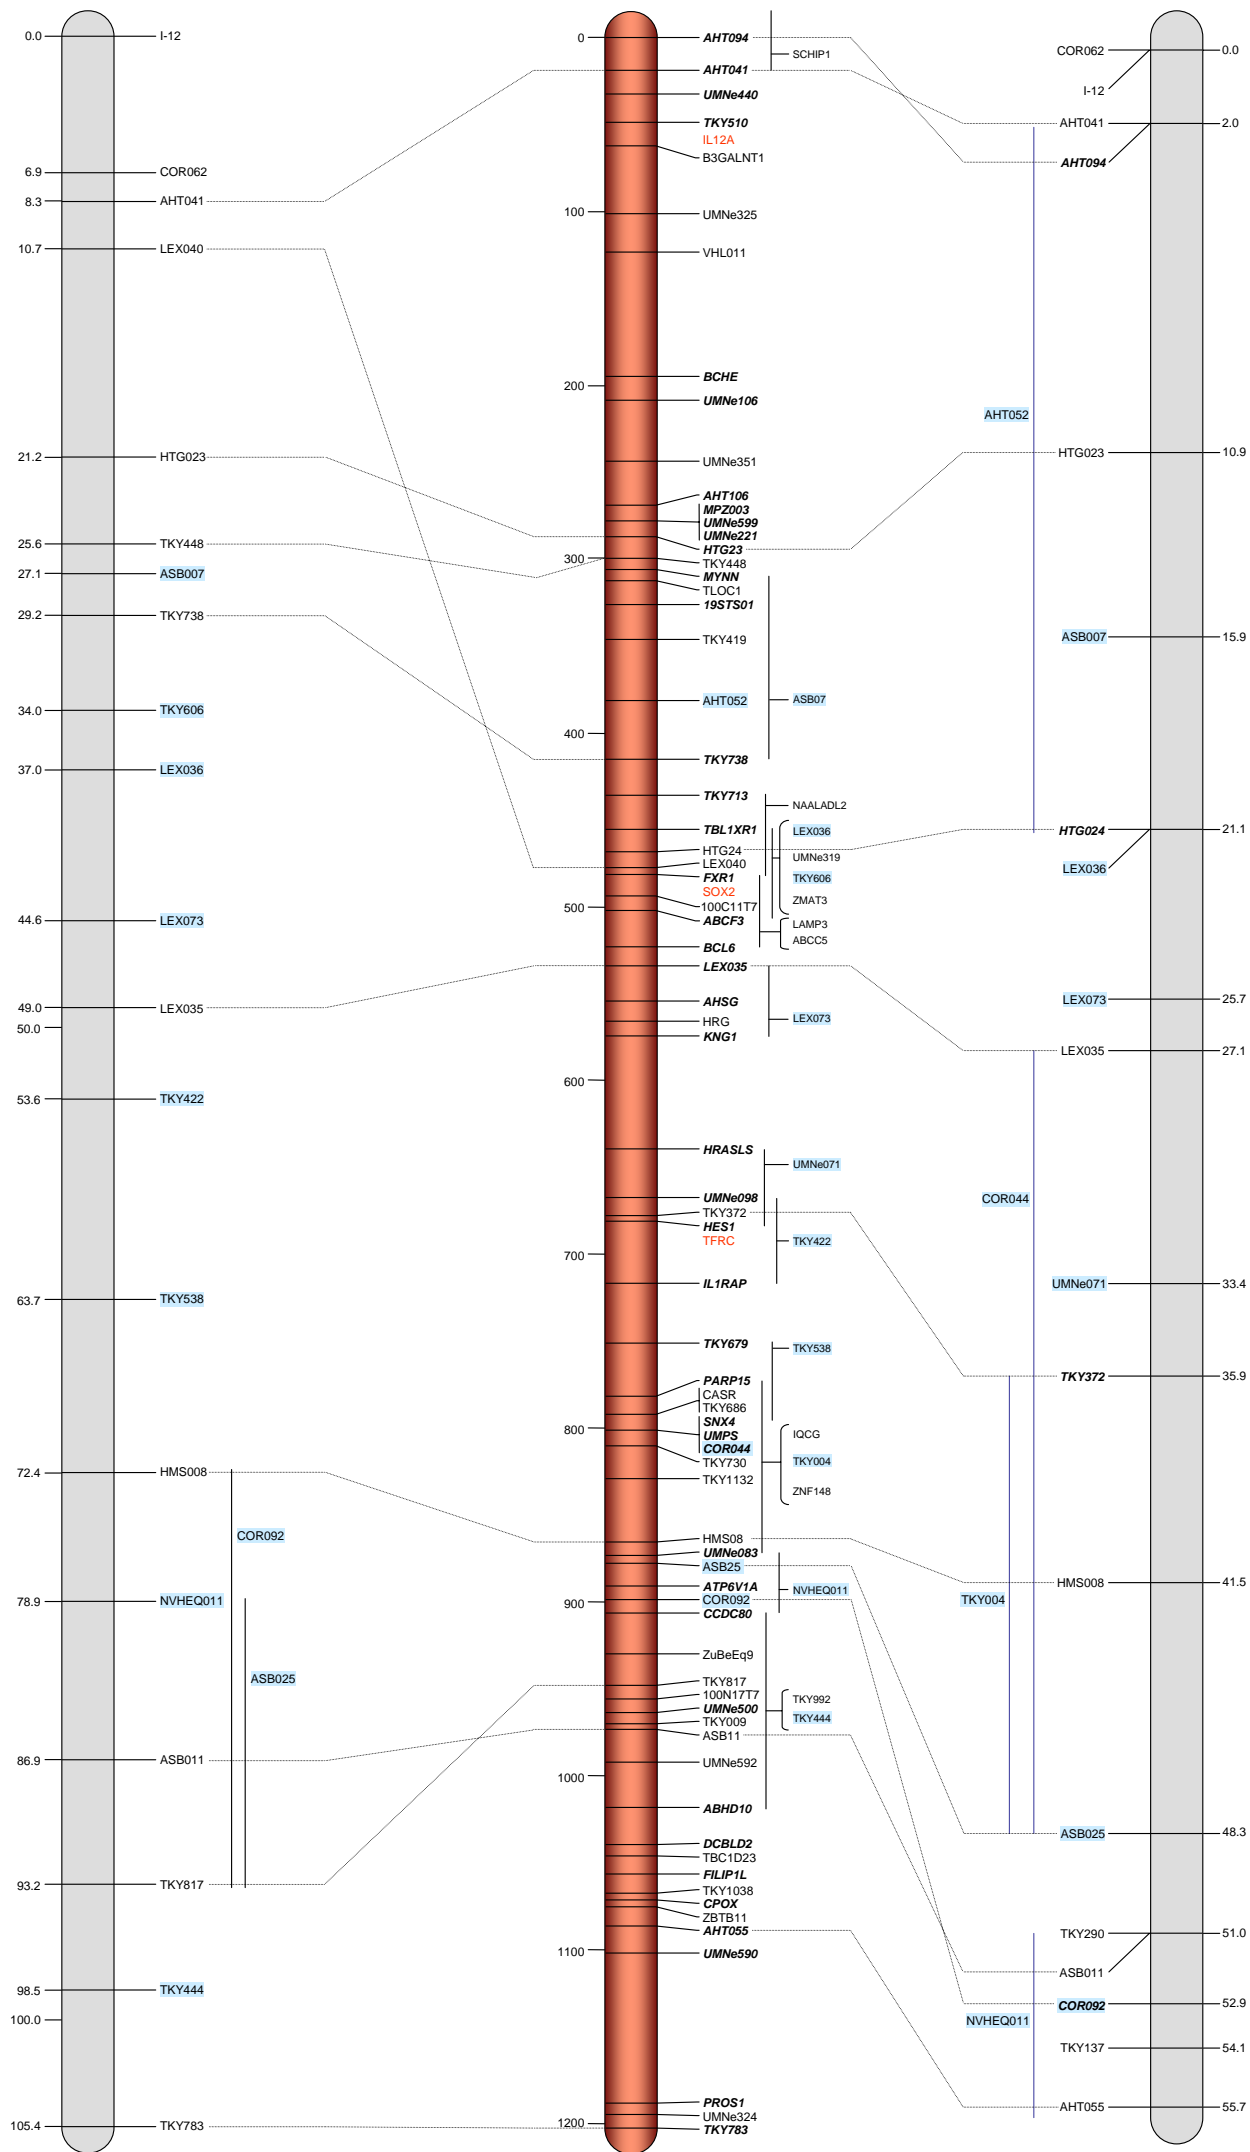

ECA20

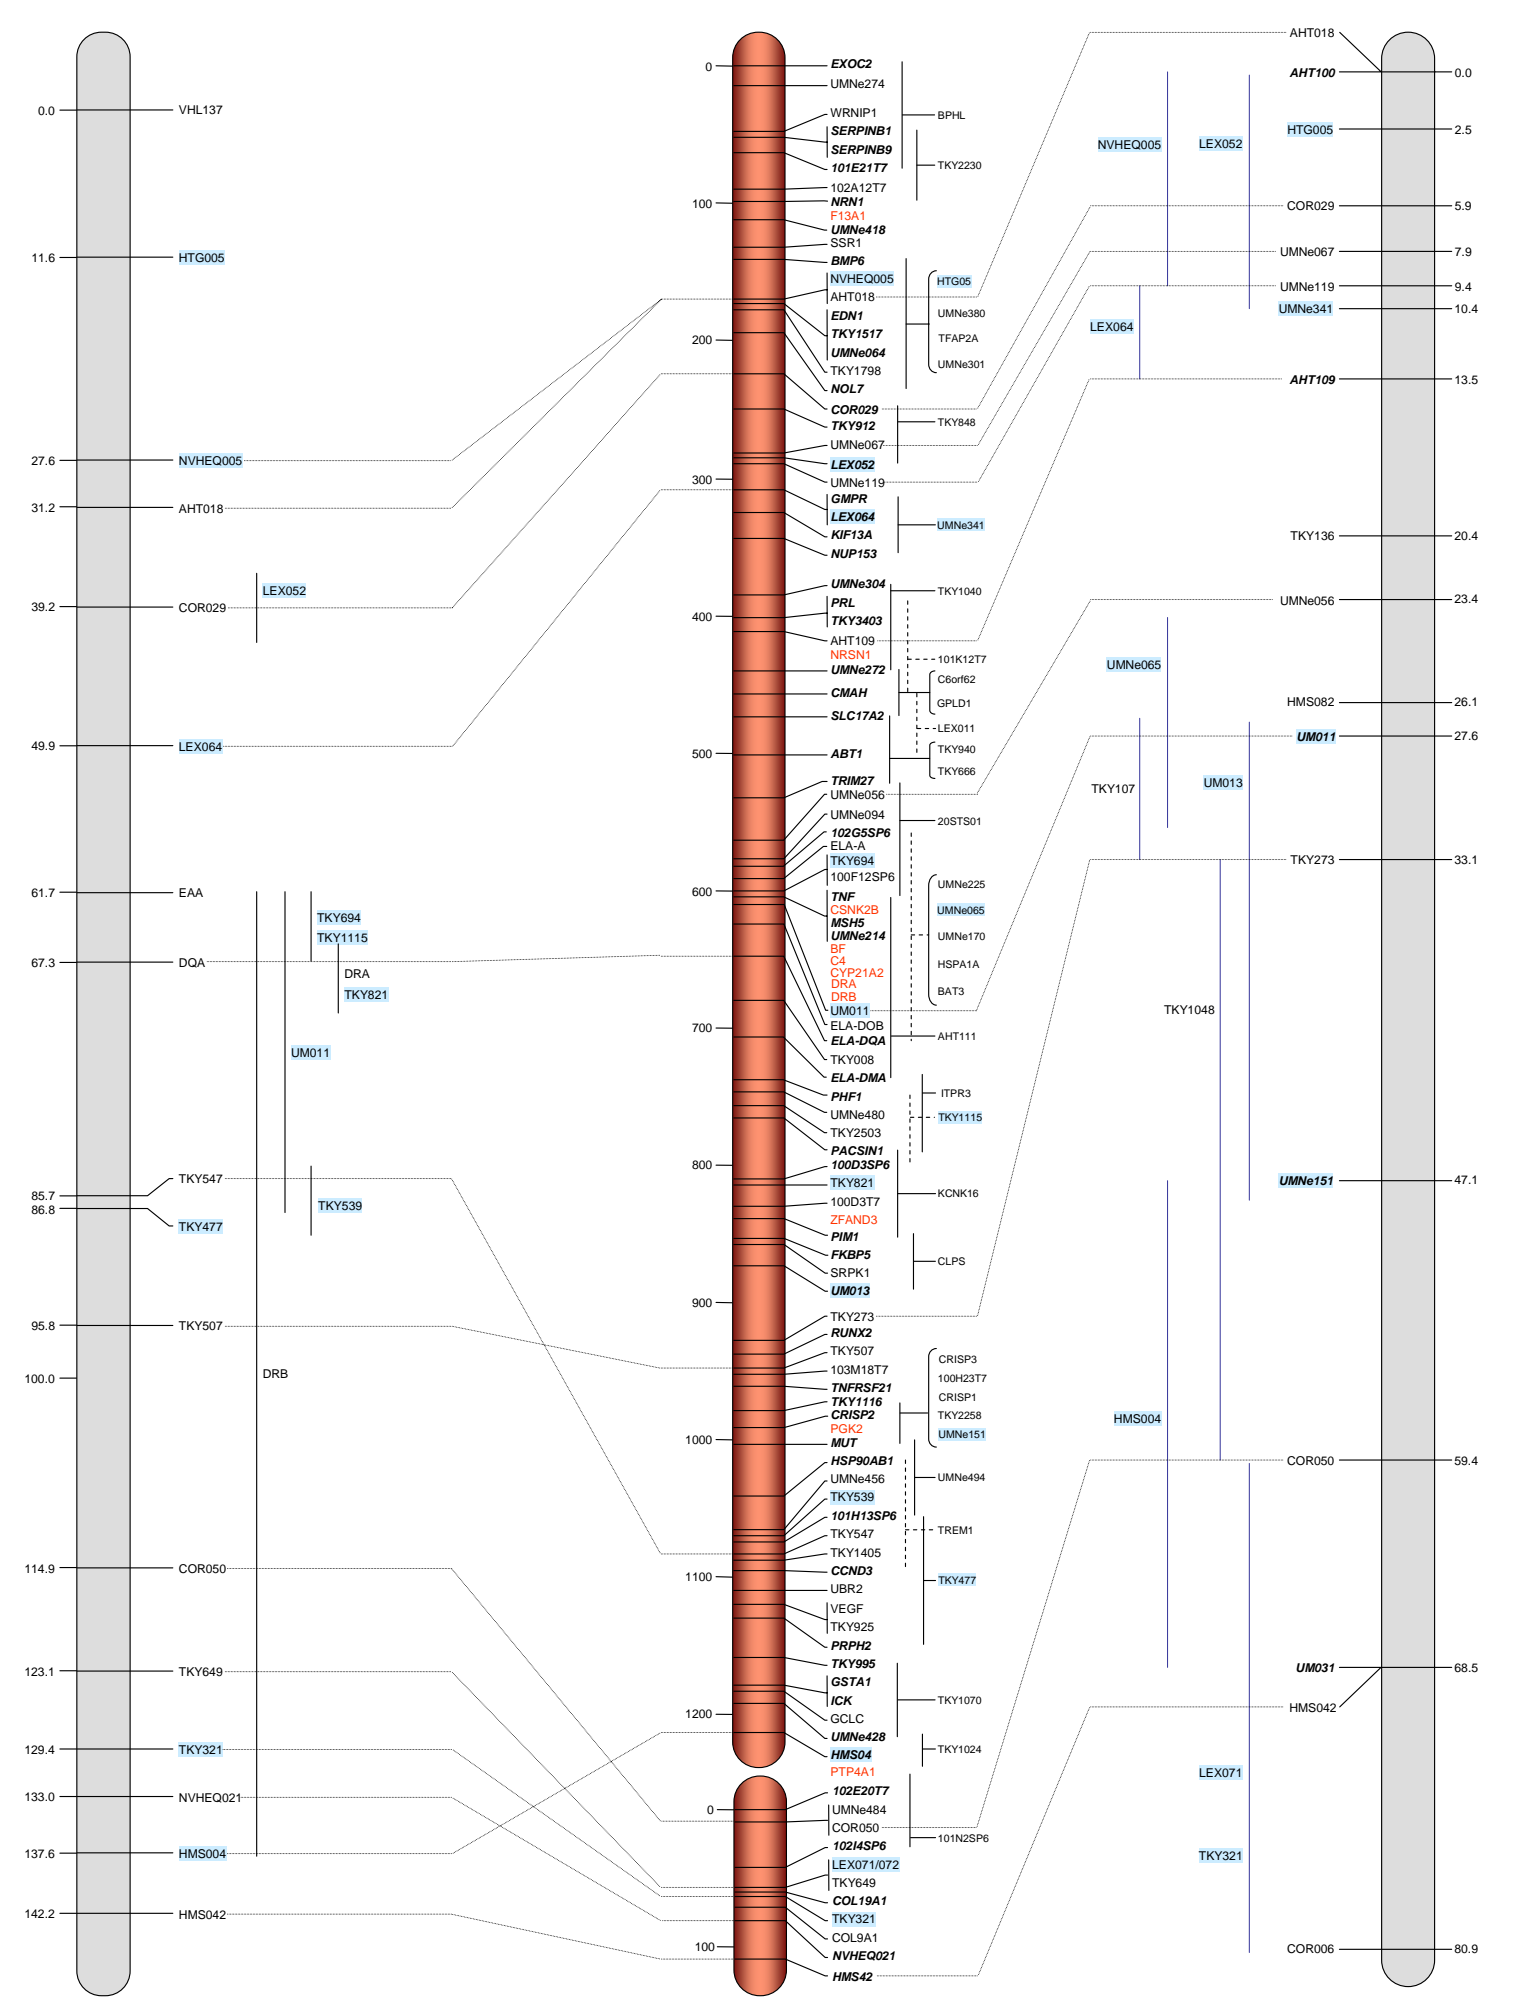

ECA 21

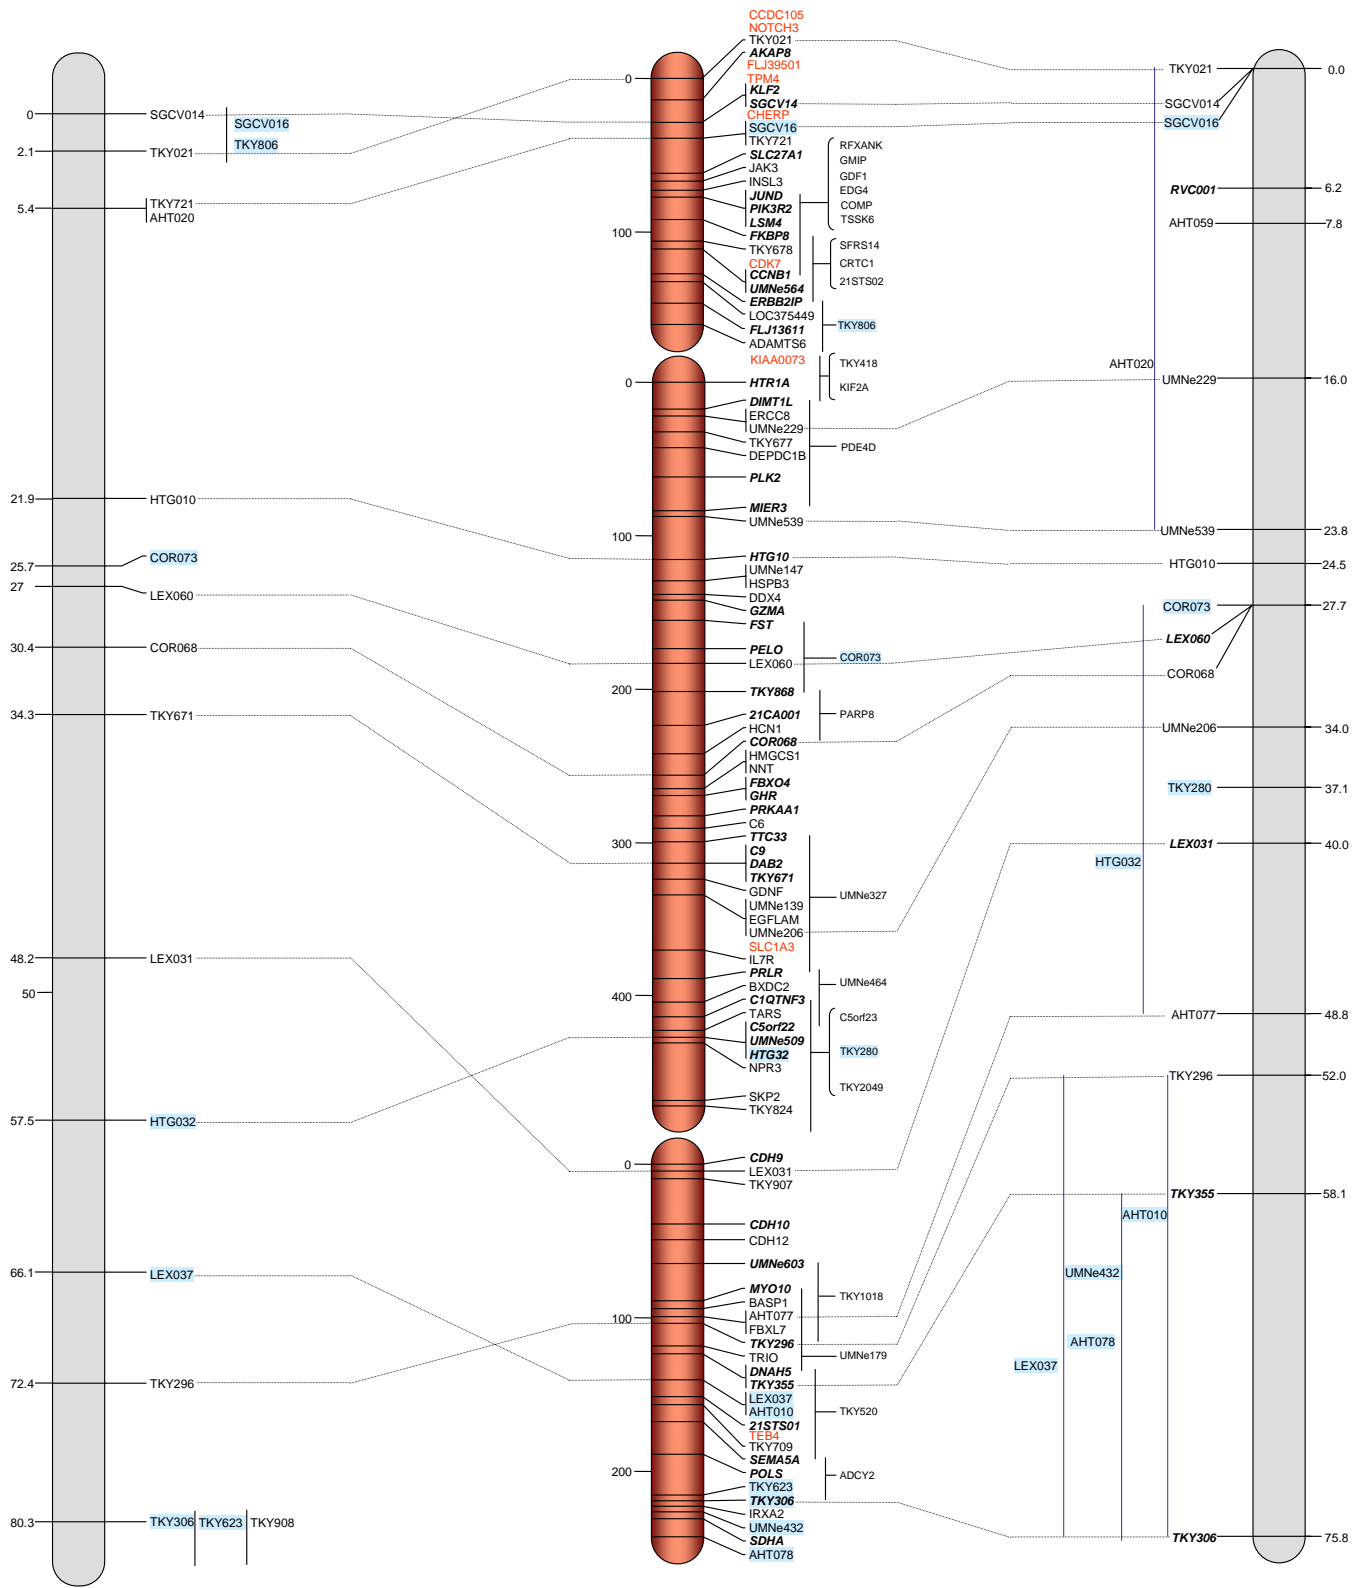



# ECA22

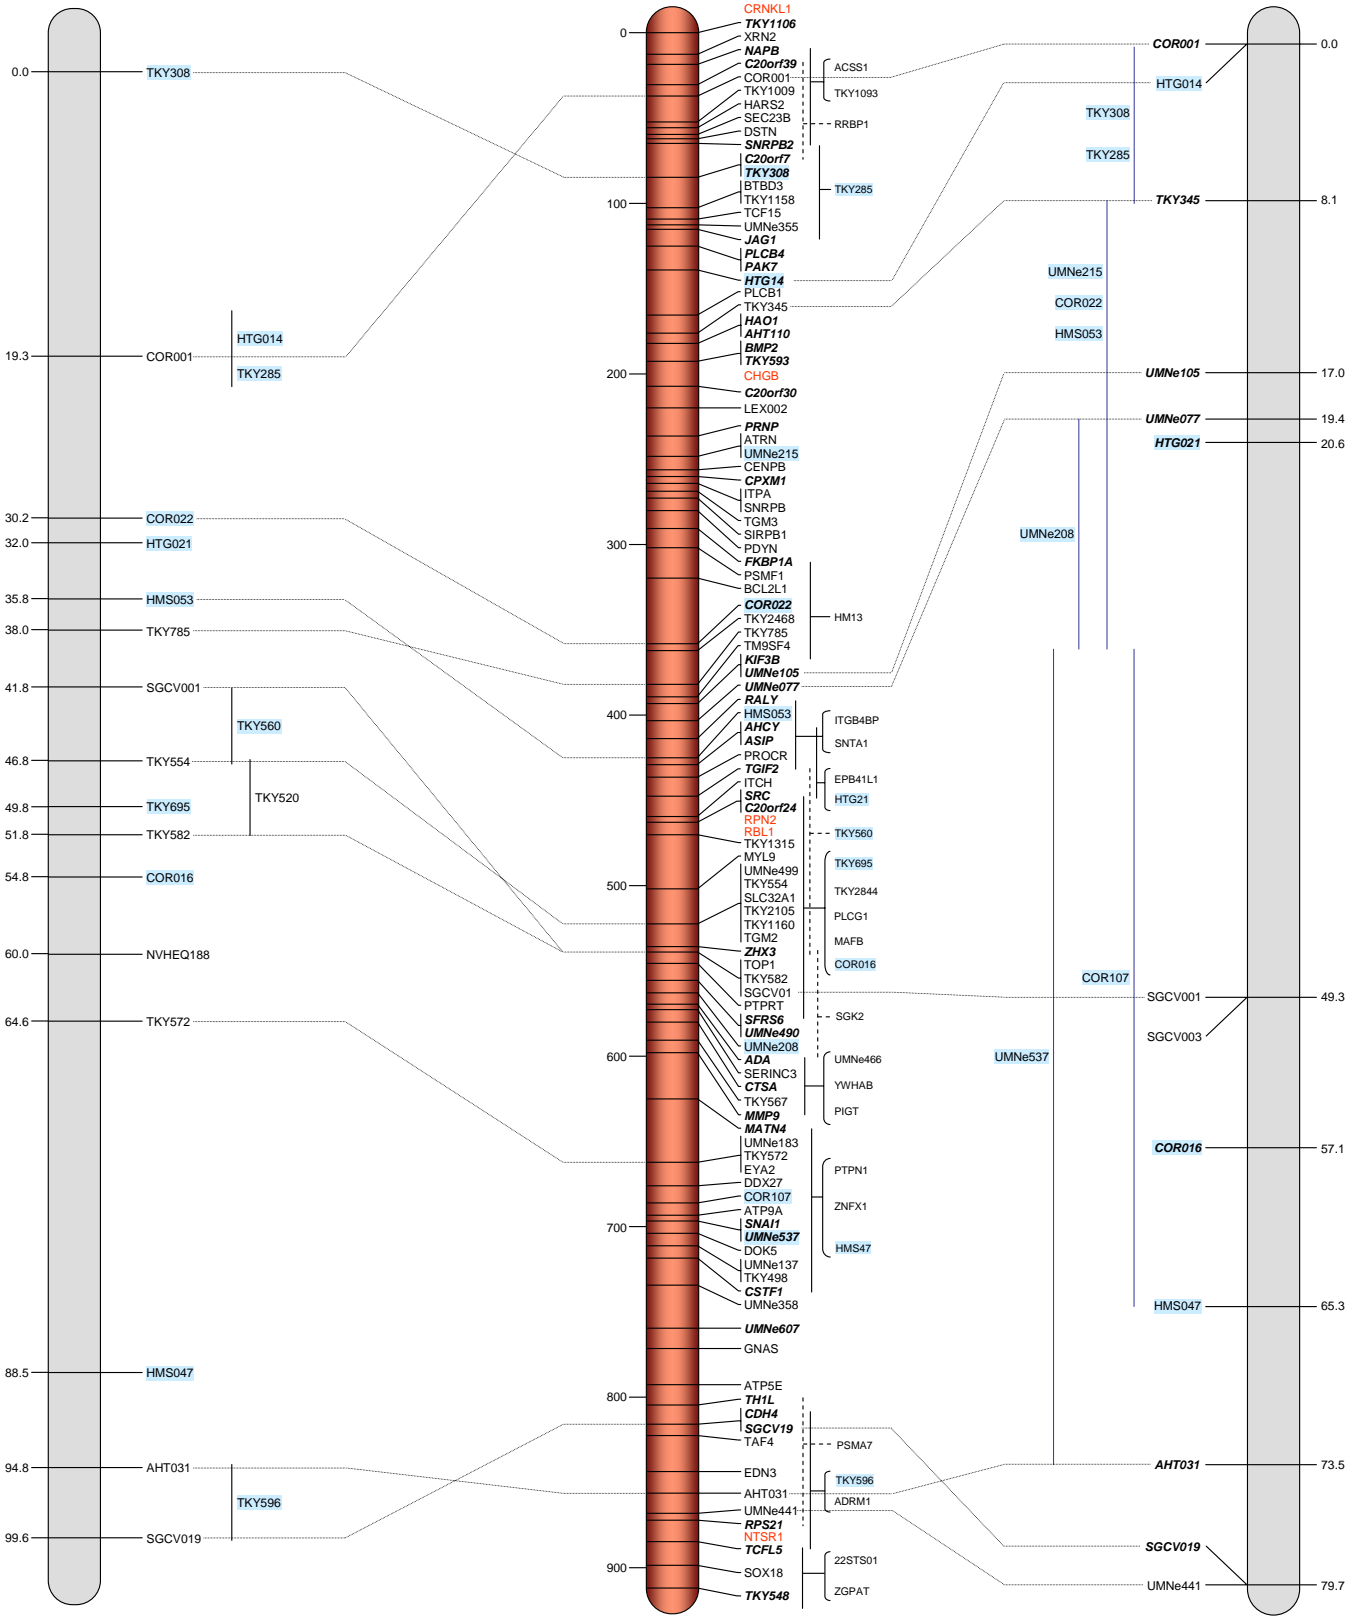

ECA23

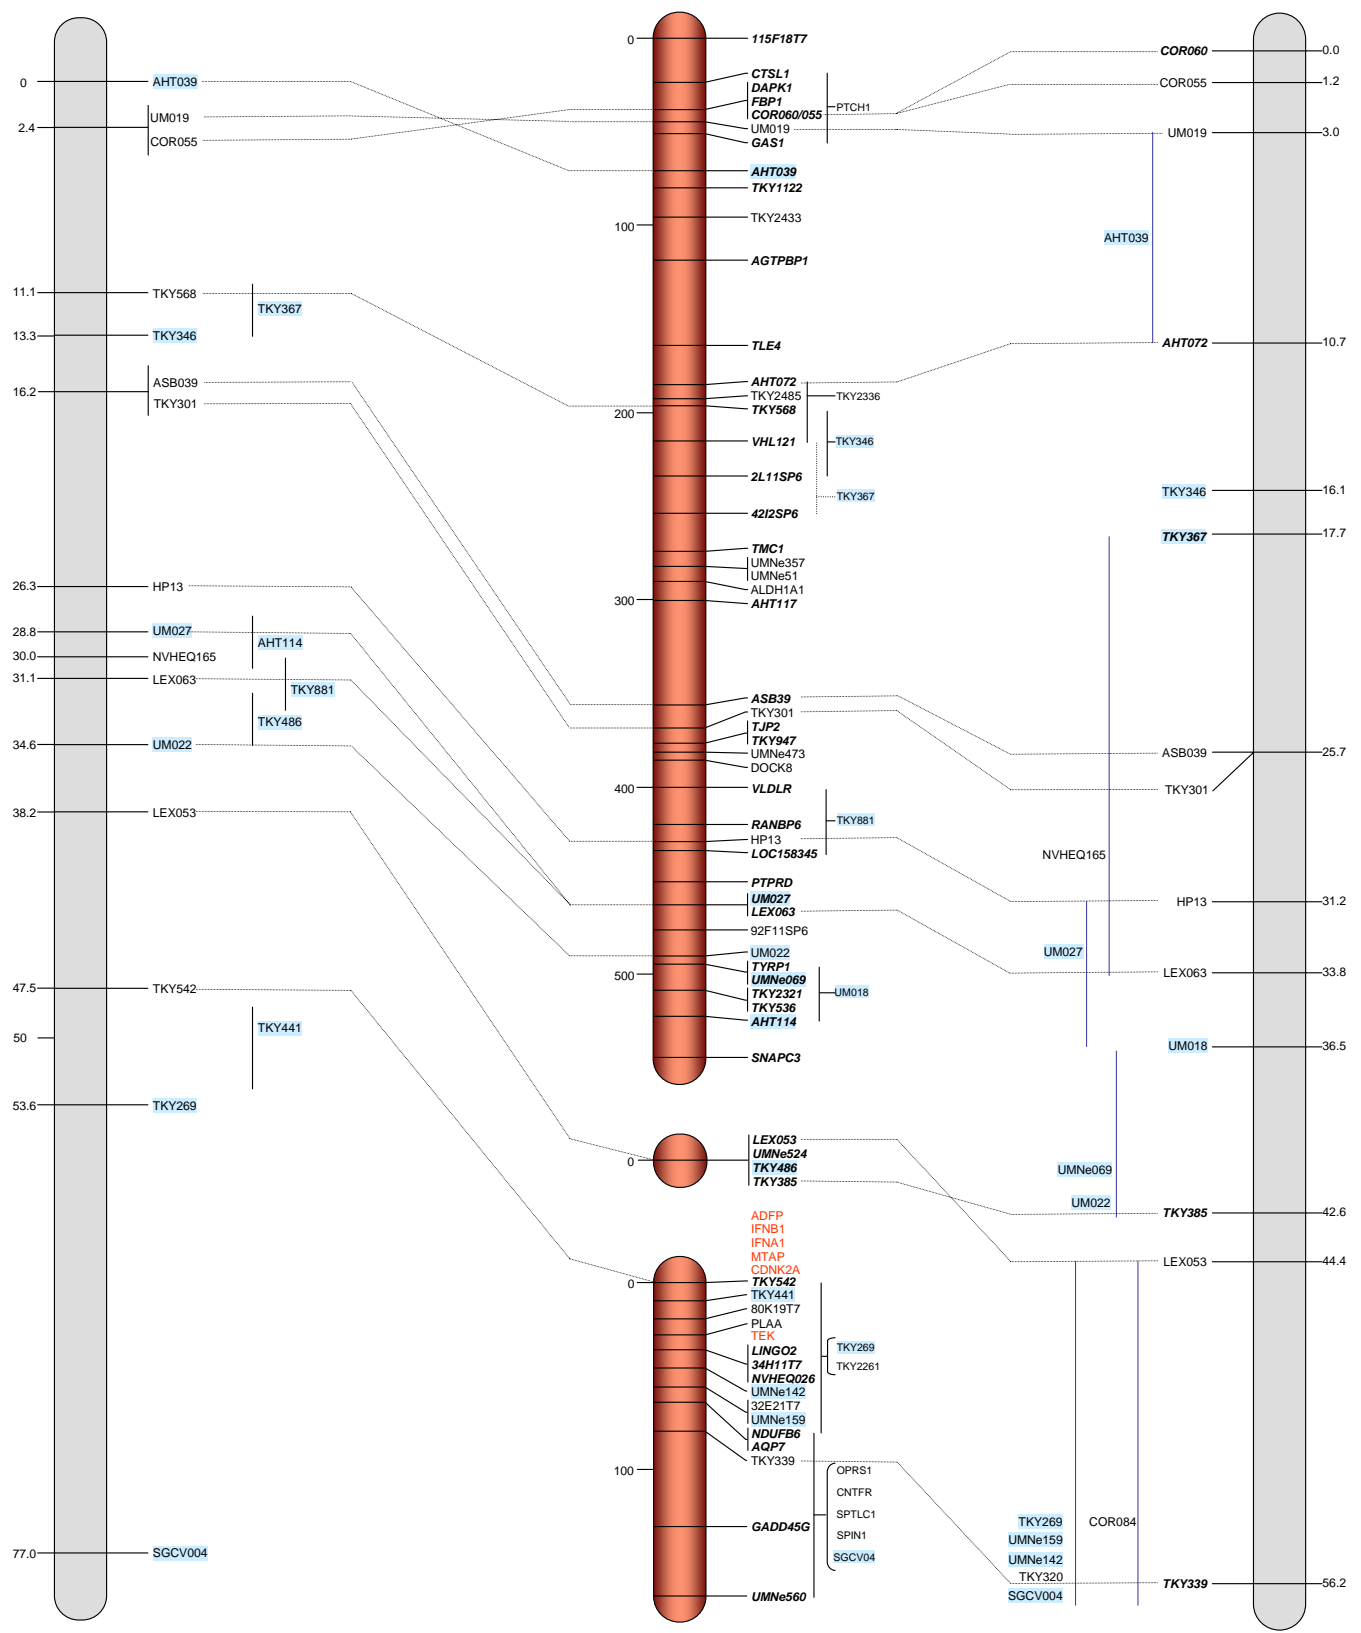

ECA24

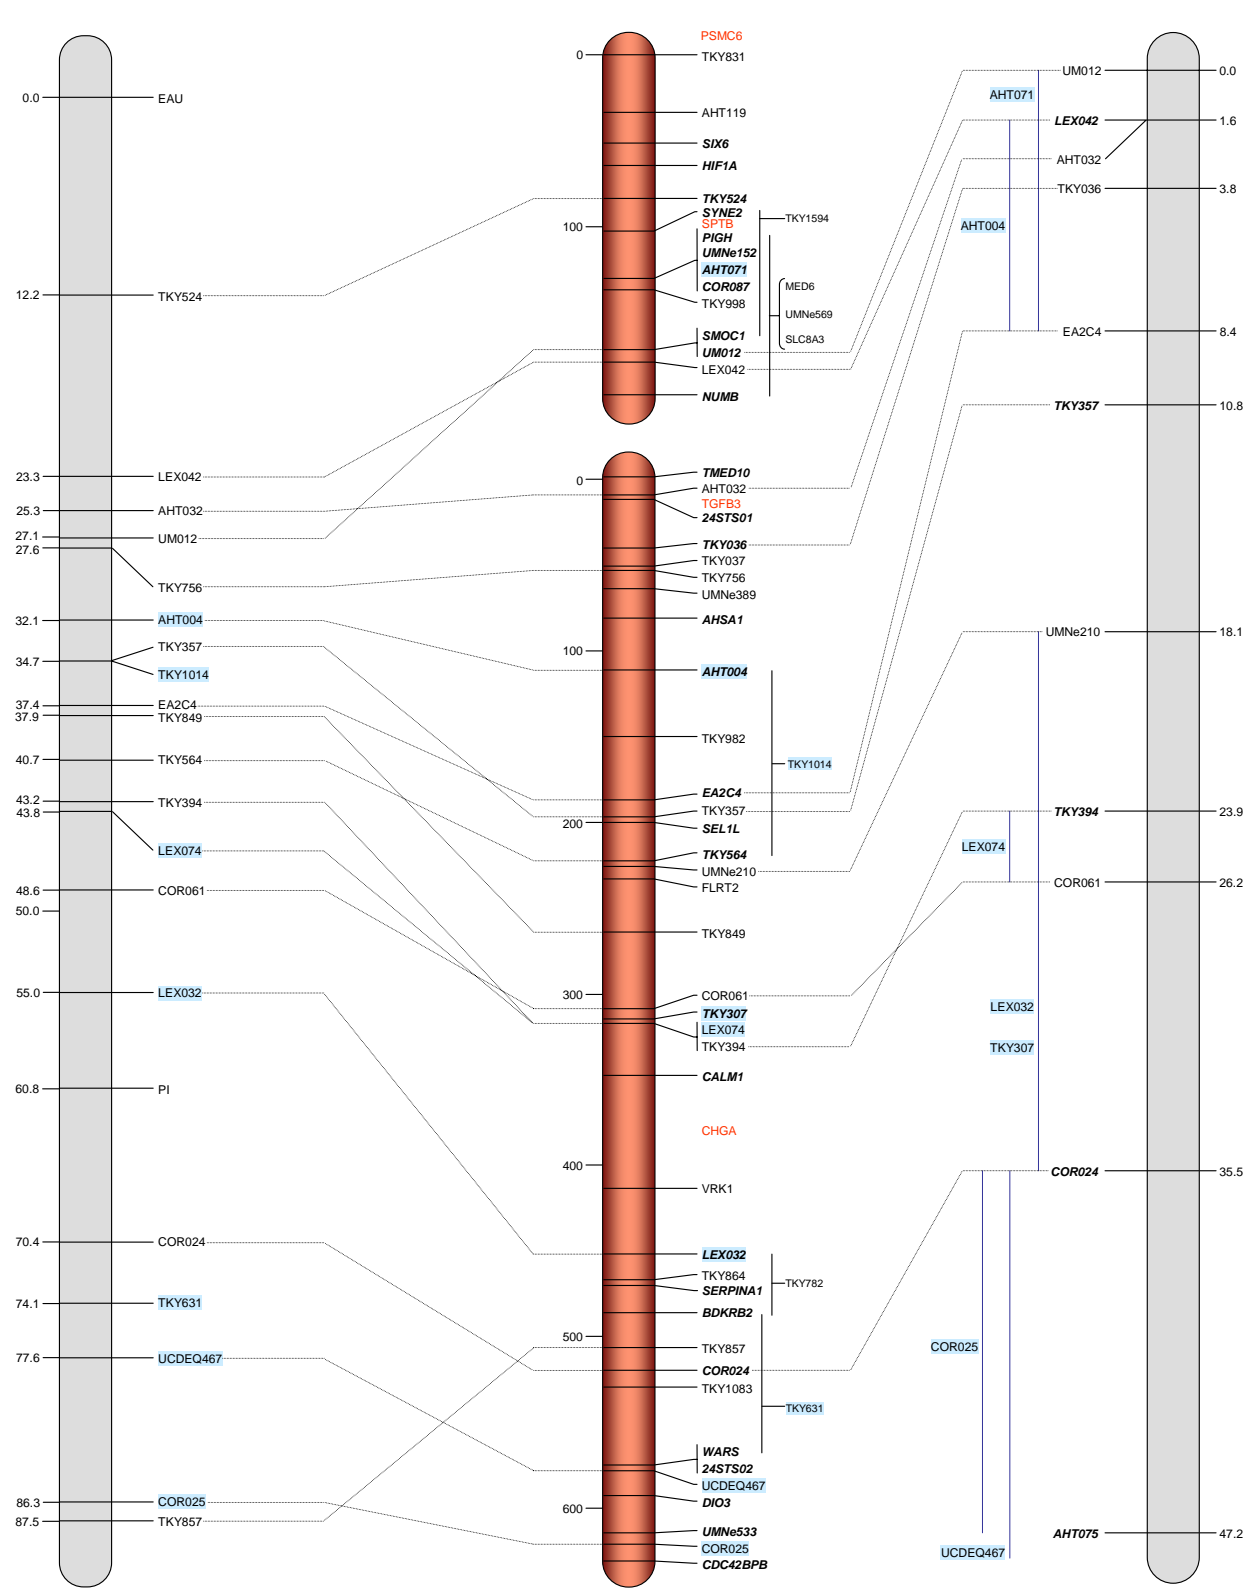

ECA25

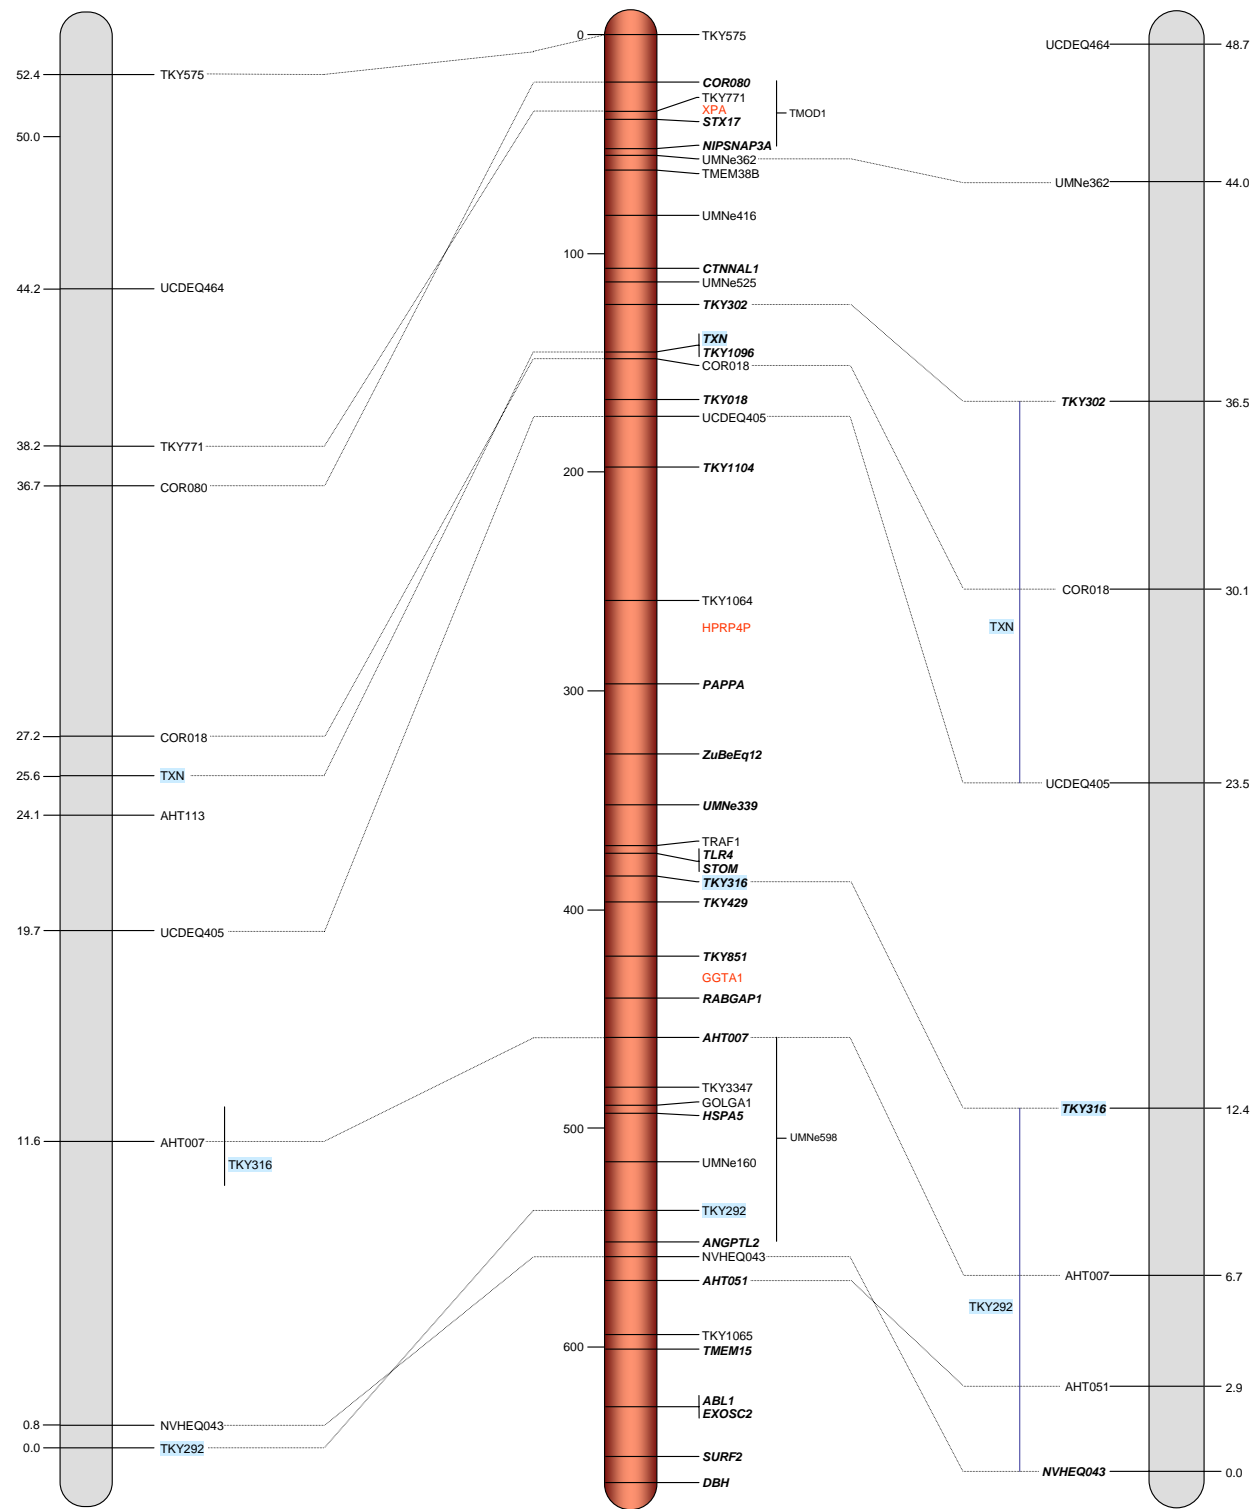

## ECA26

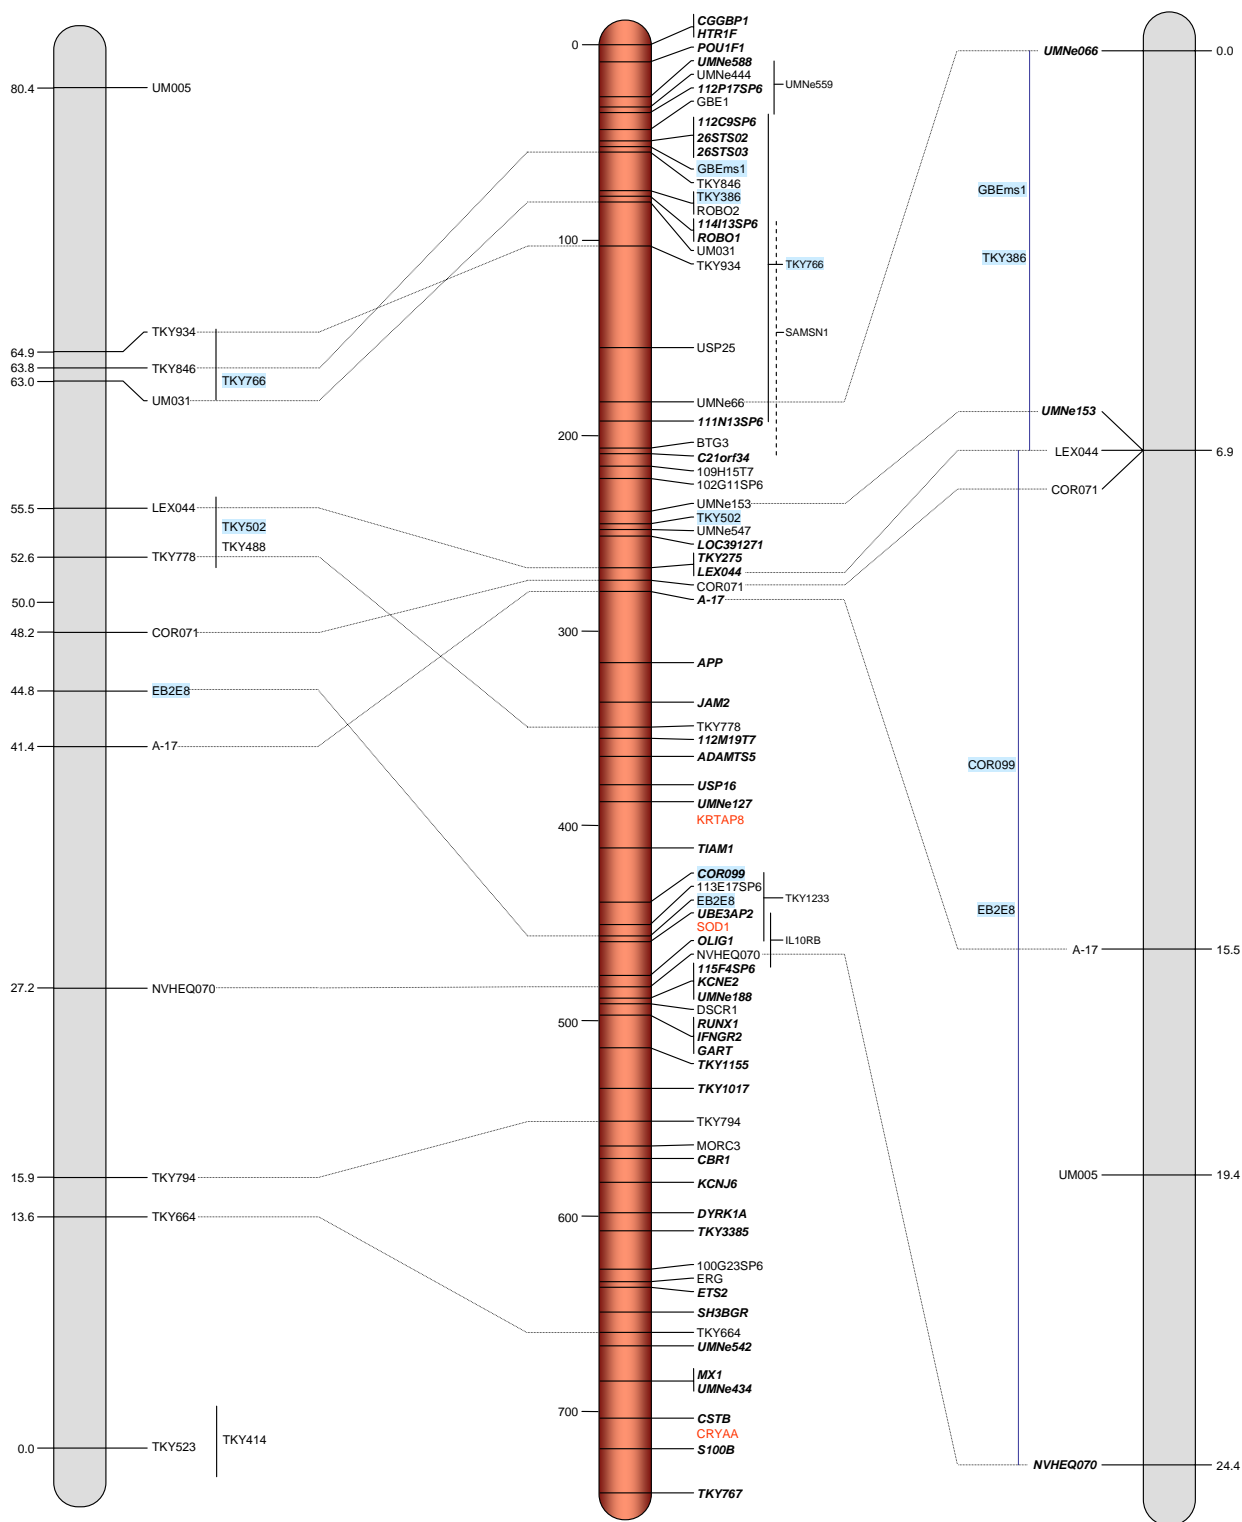

ECA27

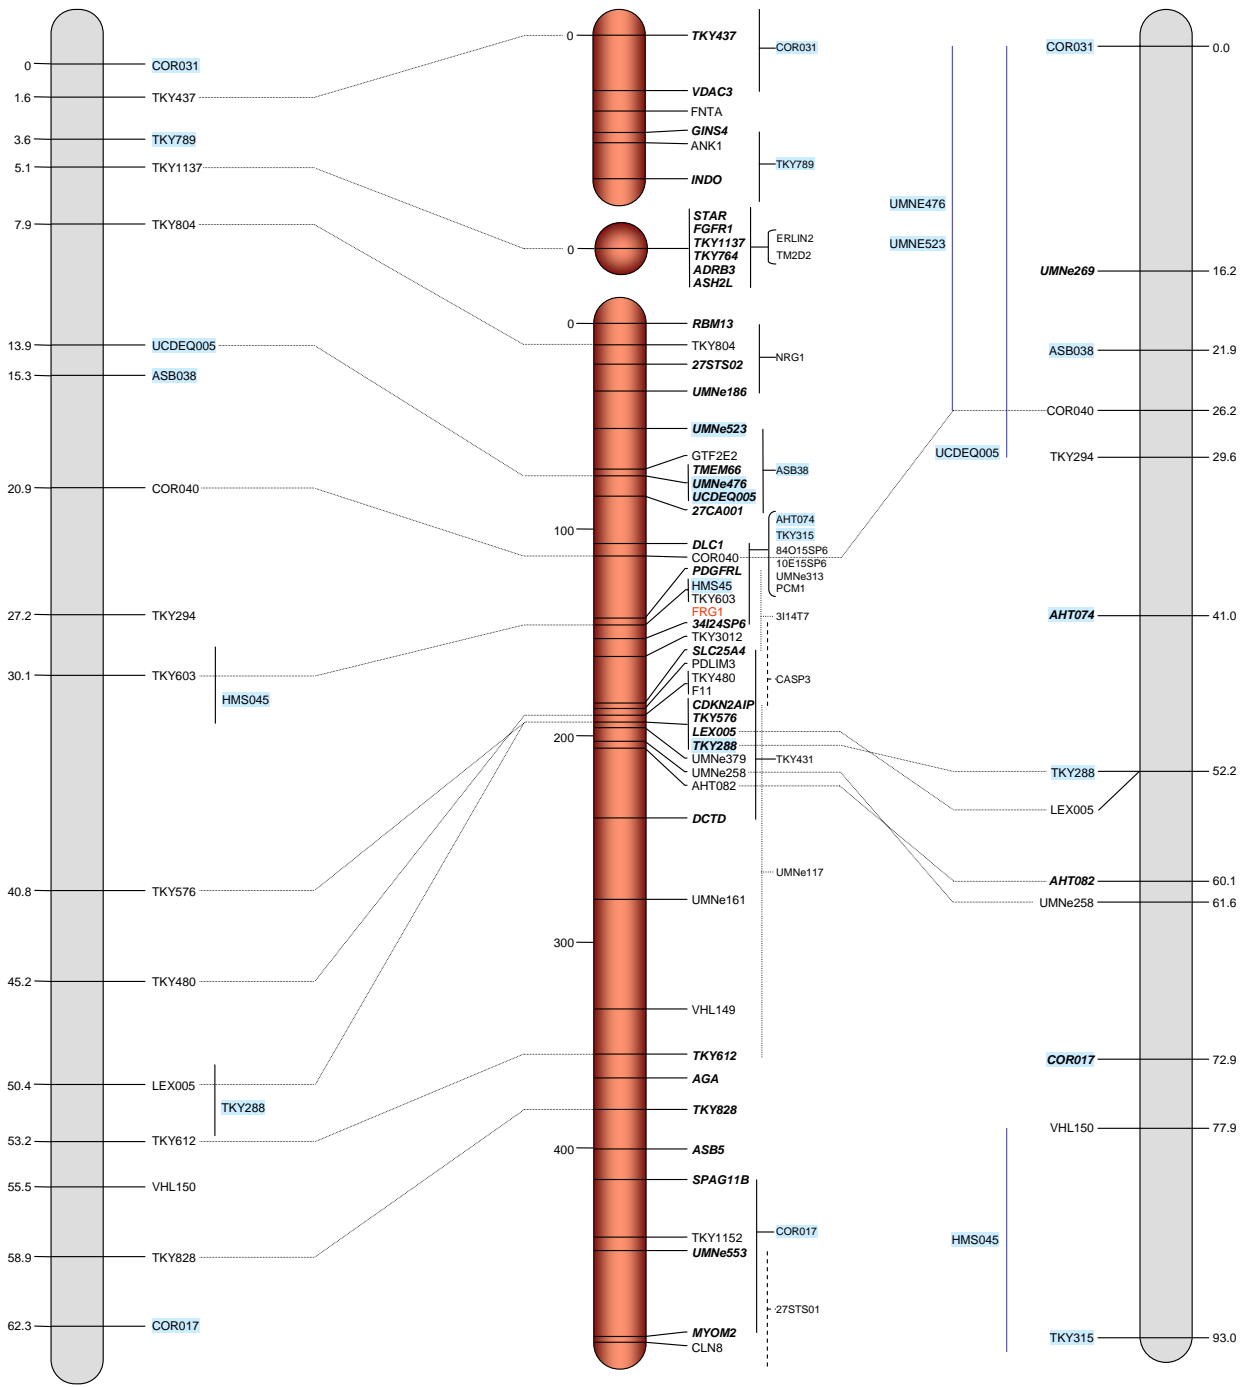

ECA28

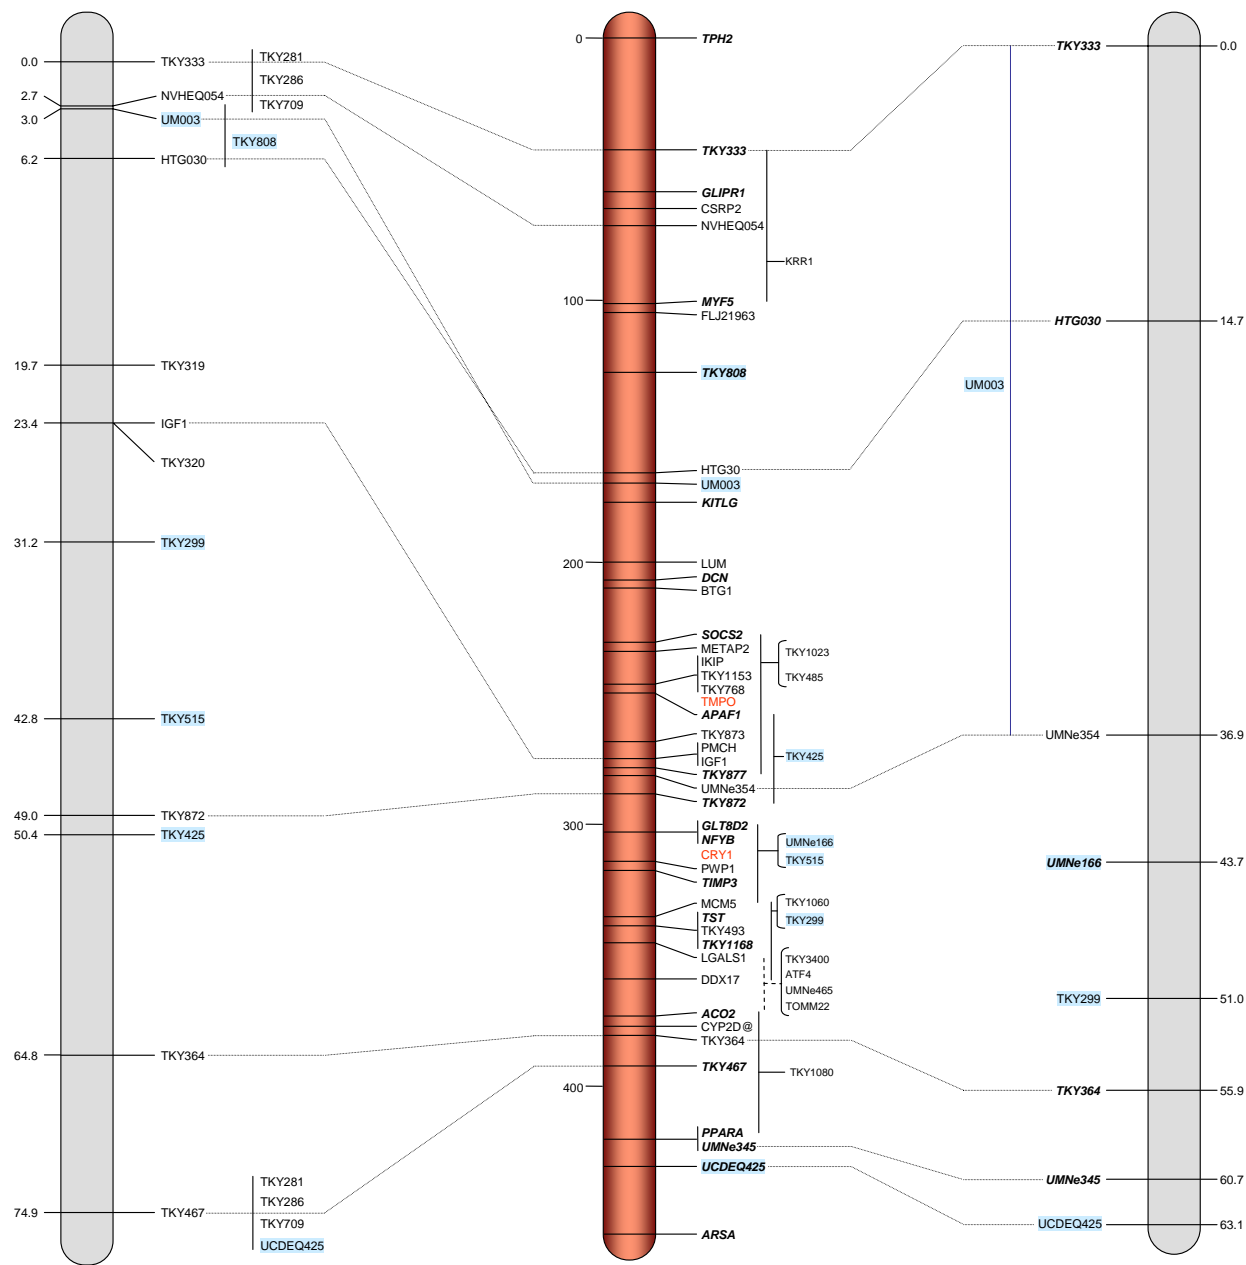



ECA29

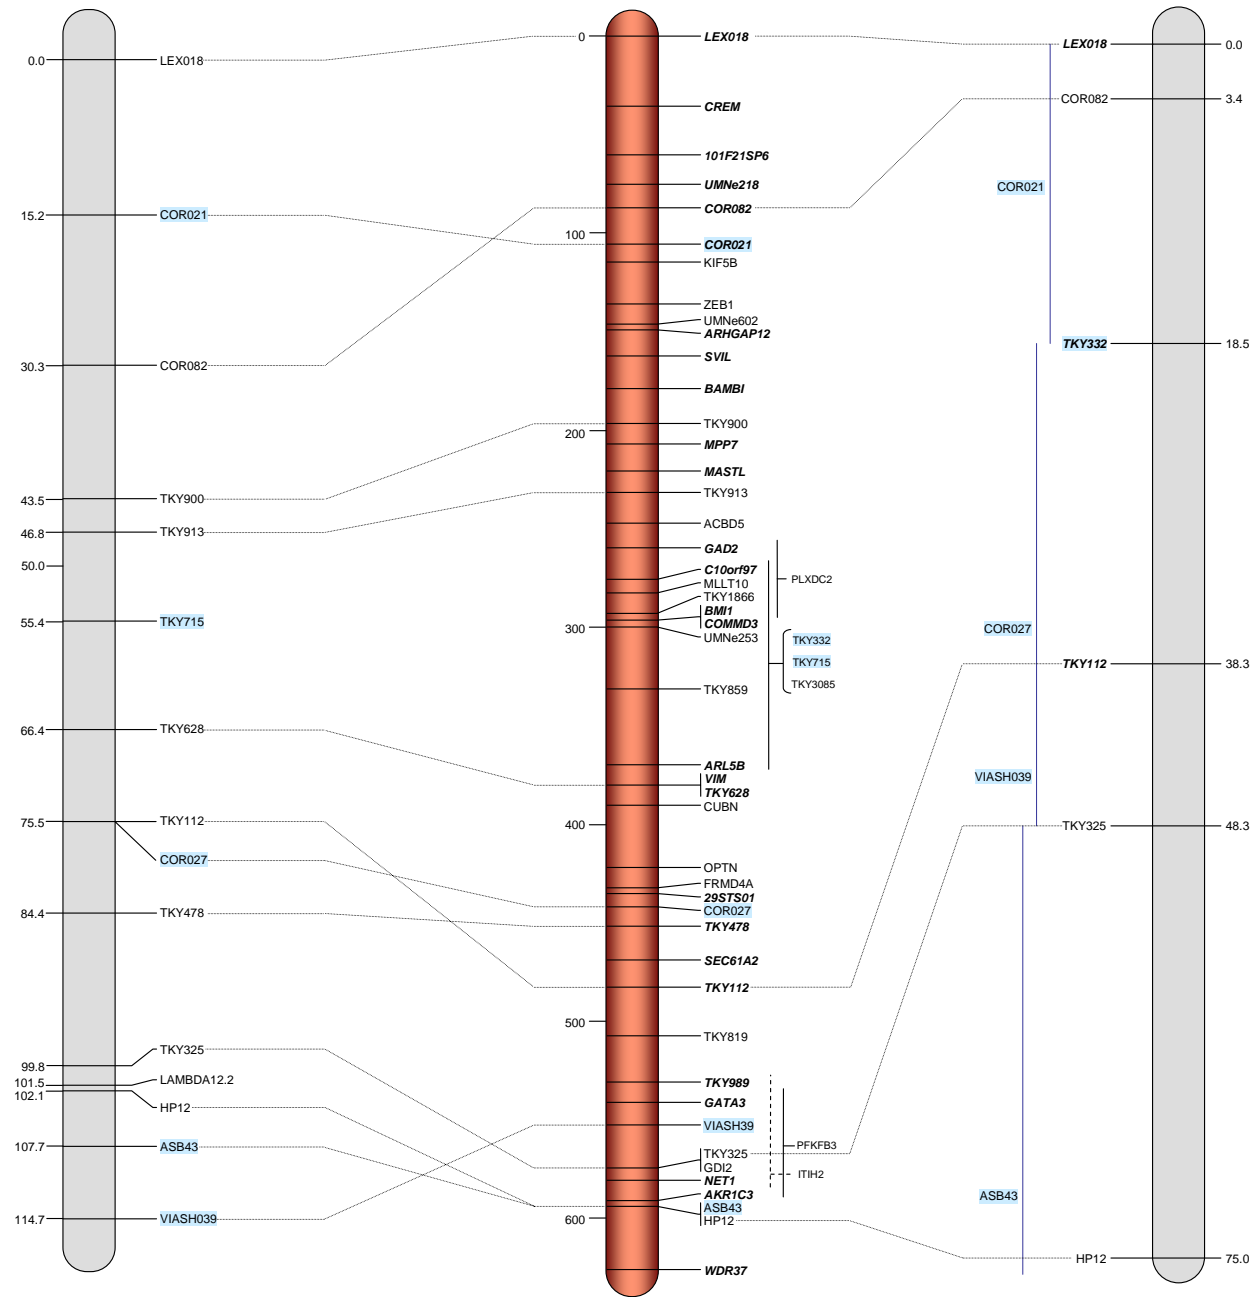

ECA30

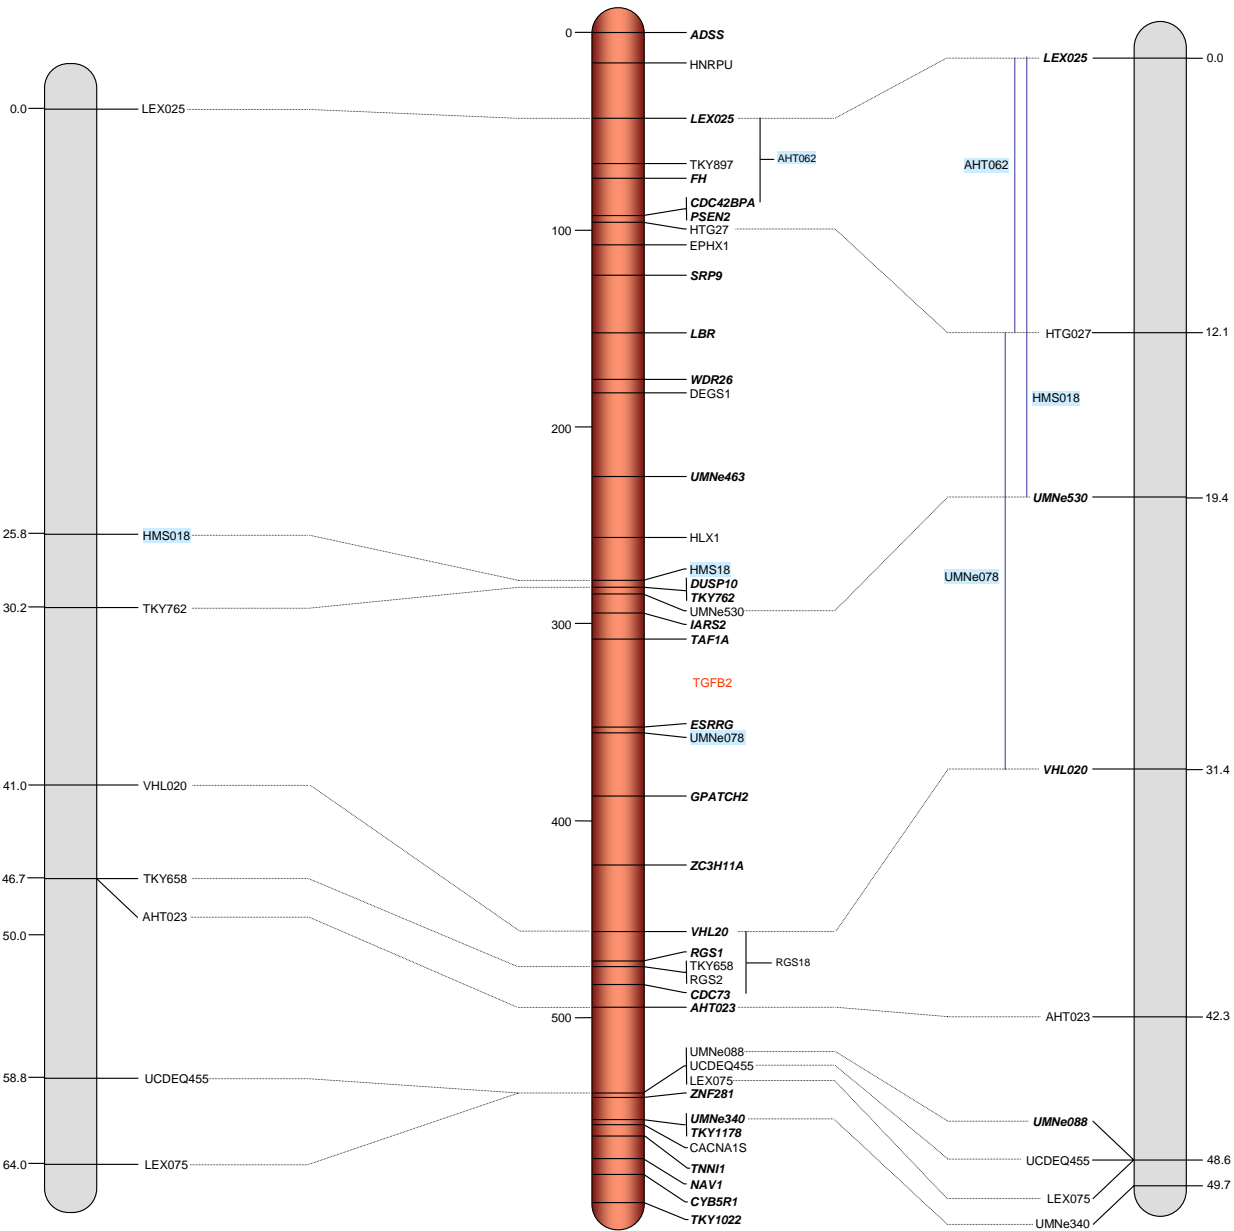

ECA31

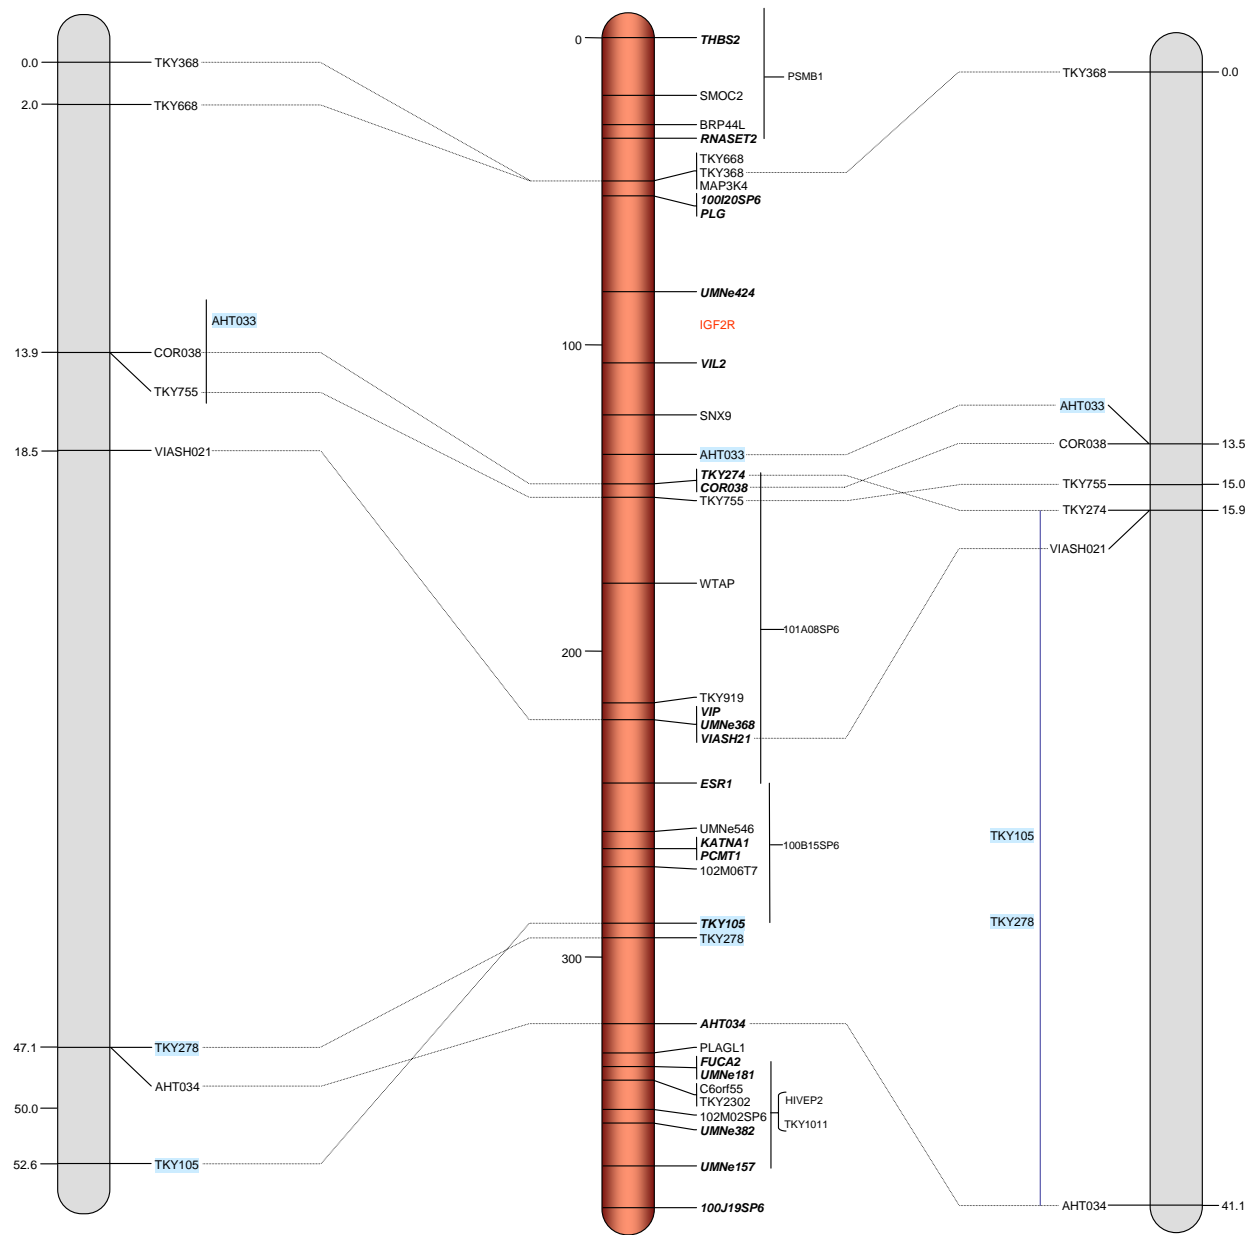

ECAX

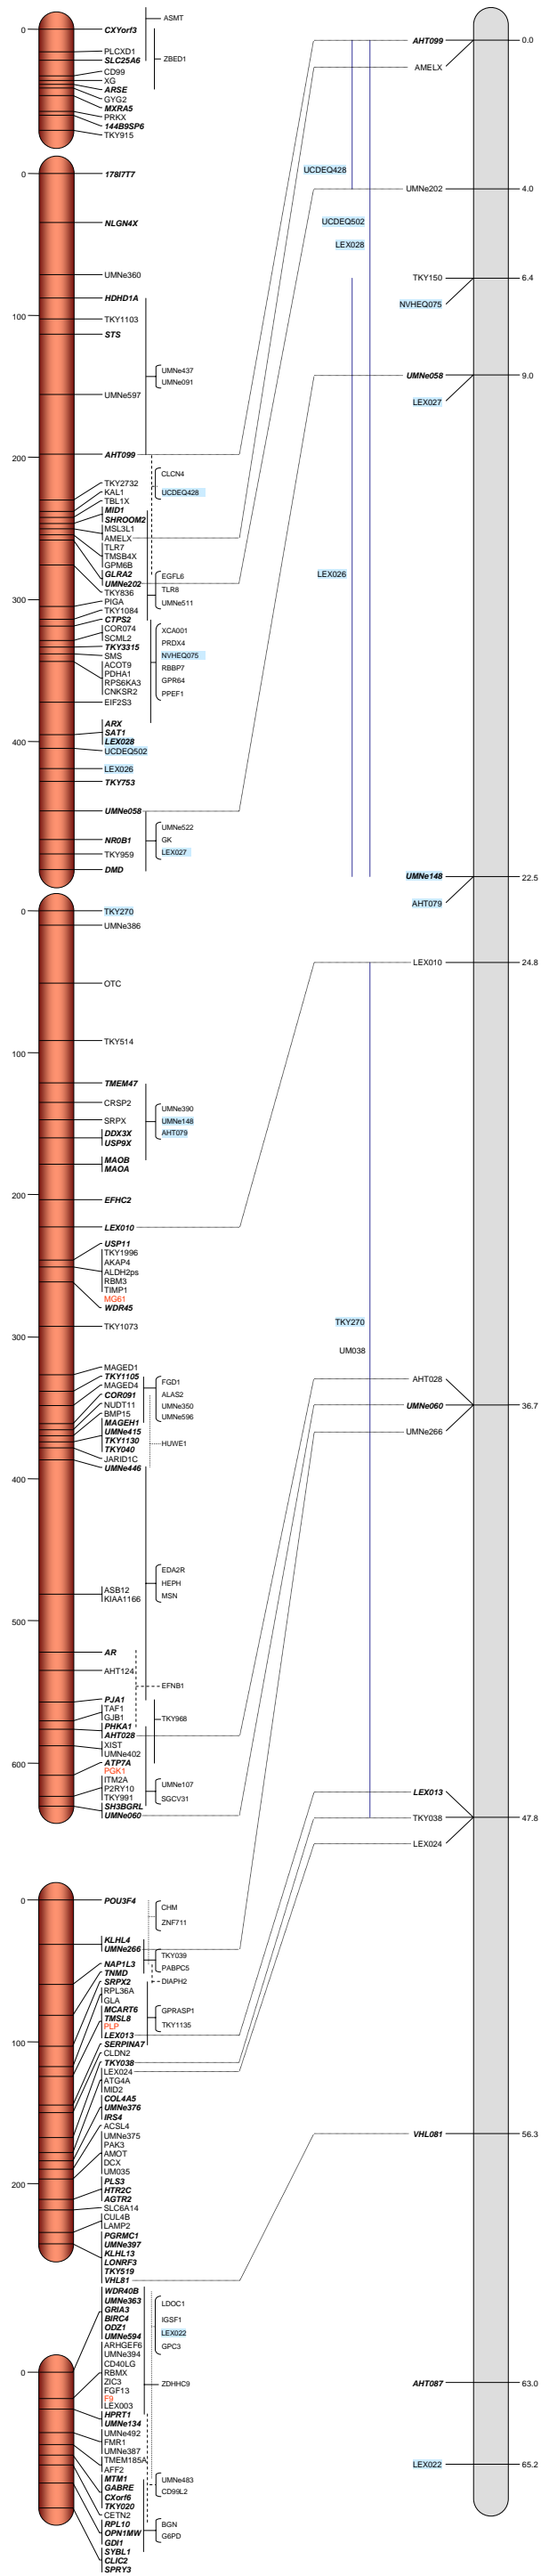

Supplement: Supplementary file 3 [file 1]
