# Supplementary material
Source: publisher figshare collection journal article supplement (https://karger.figshare.com/articles/dataset/_/5120452)
Supplement: Supplementary file 1 [file 1]

**Supplementary Table 3.** Positions of telomeres and centromeres on human, chimp, dog, cattle, mouse, rat, opossum and chicken chromosomes and corresponding chromosomes in horse.

| Human Chr.        | Size, Mb | p-arm CEN marker | Mb    | Horse Chr. | q-arm CEN marker | Mb    | Horse chr. | p-arm TEL marker | Mb   | Horse chr. | q-arm TEL marker | Mb    | Horse chr. |
|-------------------|----------|------------------|-------|------------|------------------|-------|------------|------------------|------|------------|------------------|-------|------------|
| HSA1              | 247      | GDAP2            | 118.2 | ECA5       | UMNe481          | 149.4 | ECA5       | IGS15            | 0.9  | ECA2       | HNRPU            | 243   | ECA30      |
| HSA2              | 242      | RPIA             | 88.7  | ECA15      | PROM2            | 95.3  | ECA15      | MYT1L            | 1.7  | ECA15      | HDLBP            | 241.8 | ECA6       |
| HSA3              | 199      | 111J21SP6        | 74    | ECA16      | PROS1            | 95    | ECA19      | DDX11            | 0.2  | ECA16      | TFRC             | 197.2 | ECA19      |
| HSA4              | 191      | OCIAD1           | 48.5  | ECA3       | ASB23            | 53.5  | ECA3       | TKY434           | 0.6  | ECA3       | FRG1             | 191.1 | ECA27      |
| HSA5              | 180      | HCN1             | 45.3  | ECA21      | TKY868           | 50.7  | ECA21      | SDHA             | 0.2  | ECA21      | MGAT1            | 180.1 | ECA14      |
| HSA6              | 170      | CH241-102E20_T7  | 58.6  | ECA20      | PTP4A1           | 64.3  | ECA20      | EXOC2            | 0.4  | ECA20      | THBS2            | 169.3 | ECA31      |
| HSA7              | 158      | CCT6A            | 56    | ECA13      | AUTS2            | 68.7  | ECA13      | GPR30            | 1.0  | ECA13      | DNAJB6           | 156.8 | ECA4       |
| HSA8              | 146      | VDAC3            | 42.3  | ECA27      | MCM4             | 49    | ECA9       | CLN8             | 1.7  | ECA27      | RPL8             | 145.9 | ECA9       |
| HSA9              | 140      | CH241-115F18_T7  | 41.5  | ECA23      | UMNe473          | 69.1  | ECA23      | DOCK8            | 0.2  | ECA23      | DBH              | 135.4 | ECA25      |
| HSA10             | 135      | ZNF248           | 38.1  | ECA1       | HNRPF            | 43.2  | ECA1       | WDR37            | 1.0  | ECA29      | TXNL2            | 131.8 | ECA1       |
| HSA11             | 134      | MADD             | 47.2  | ECA12      | CNTF             | 58.1  | ECA12      | IFITM3           | 0.3  | ECA12      | OPCML            | 131.7 | ECA7       |
| HSA12             | 132      | MGC50559         | 31.7  | ECA6       | PRICKLE1         | 41.1  | ECA6       | NINJ2            | 0.5  | ECA6       | SFRS8            | 130.7 | ECA8       |
| HSA13             | 114      |                  |       |            | ZMYM2            | 19.4  | ECA17      |                  |      |            | CDC16            | 114   | ECA17      |
| HSA14             | 106      |                  |       |            | NP               | 20    | ECA1       |                  |      |            | CDC42BPB         | 102.4 | ECA24      |
| HSA15             | 100      |                  |       |            | NDN              | 21.4  | ECA1       |                  |      |            | TM2D3            | 100   | ECA1       |
| HSA16             | 89       | ERAF             | 31.4  | ECA13      | PHKB             | 46    | ECA3       | HBA1             |      | ECA13      | GAS8             | 88.6  | ECA3       |
| HSA17             | 79       | UMNe443          | 11.2  | ECA11      | TNFAIP1          | 23.6  | ECA11      | GEMIN4           | 0.5  | ECA11      | CSNK1D           | 77.8  | ECA11      |
| HSA18             | 76       | TKY653           | 18.6  | ECA8       | NPC1             | 19.3  | ECA8       | ROCK1            | 0.09 | ECA8       | TKY932           |       | ECA8       |
| HSA19             | 64       | FKBP8            | 18.5  | ECA21      | AHT049           | 33.3  | ECA10      | C19orf19         | 0.4  | ECA7       | RPS5             | 63.5  | ECA10      |
| HSA20             | 62       | CRNKL1           | 19.9  | ECA22      | BCL2L1           | 29.7  | ECA22      | TCF15            | 0.5  | ECA22      | SOX18            | 62.1  | ECA22      |
| HSA21             | 46       |                  |       |            | USP25            | 16    | ECA26      |                  |      |            | S100B            | 46.8  | ECA26      |
| HSA22             | 49       |                  |       |            | DGCR14           | 17.5  | ECA8       |                  |      |            | ARSA             | 49.4  | ECA28      |
| HSAX              | 154      | UMNe446          | 52.9  | ECAX       | ASB12            | 63.3  | ECAX       | PLCXD1           | 0.1  | ECAX       | SYBL1            | 154.7 | ECAX       |
| <b>Chimp Chr.</b> |          |                  |       |            |                  |       |            |                  |      |            |                  |       |            |
| PTR1              | 247      | GDAP2            | 119.6 | ECA5       | TDRKH            | 130.8 | ECA5       | IGS15            | 0.9  | ECA2       | HNRPU            | 225.8 | ECA30      |
| PTR2a             | 114      | n/a              |       |            | MYT1L            | 1.7   | ECA15      | n/a              |      |            | IL1B             | 113.7 | ECA15      |
| PTR2b             | 248      | n/a              |       |            | ACTR3            | 1.7   | ECA18      | n/a              |      |            | HDLBP            | 247.6 | ECA6       |
| PTR3              | 199      | FOXP1            | 72.8  | ECA16      | PROS1            | 97.6  | ECA19      | DDX11            | 0.2  | ECA16      | TFRC             | 201.6 | ECA19      |
| PTR4              | 191      | inversion        |       | ECA3       | inversion        |       | ECA3       | FGFR3            | 1.8  | ECA3       | F11              | 190.9 | ECA27      |
| PTR5              | 180      | inversion        |       | ECA21      | inversion        |       | ECA21      | SDHA             | 0.3  | ECA21      | MGAT1            | 183.3 | ECA14      |
| PTR6              | 170      | n/a              |       | ECA20      | n/a              |       | ECA20      | EXOC2            | 0.4  | ECA20      | THBS2            | 172.3 | ECA31      |

|                 |     |           |      |       |          |      |       |          |      |       |          |       |       |
|-----------------|-----|-----------|------|-------|----------|------|-------|----------|------|-------|----------|-------|-------|
| PTR7            | 158 | CCT6A     | 57.0 | ECA13 | AUTS2    | 69.3 | ECA13 | GPR30    | 0.9  | ECA13 | DNAJB6   | 158.2 | ECA4  |
| PTR8            | 146 | VDAC3     | 39.1 | ECA27 | MCM4     | 45.9 | ECA9  | CLN8     | 1.7  | ECA27 | RPL8     | 144.8 | ECA9  |
| PTR9            | 140 | n/a       |      | ECA23 | TJP2     | 67.8 | ECA23 | DOCK8    | 0.2  | ECA23 | DBH      | 133.7 | ECA25 |
| PTR10           | 135 | ZNF248    | 38.6 | ECA1  | HNRPF    | 43.5 | ECA1  | WDR37    | 1.1  | ECA29 | TXNL2    | 131.2 | ECA1  |
| PTR11           | 134 | MADD      | 47.8 | ECA12 | MS4A2    | 58.3 | ECA12 | IFITM3   | 0.3  | ECA12 | OPCML    | 131.5 | ECA7  |
| PTR12           | 132 | PRICKLE1  | 47.2 | ECA6  | MGC50559 | 57.2 | ECA6  | NINJ2    | 0.5  | ECA6  | SFRS8    | 133.7 | ECA8  |
| PTR13           | 114 |           |      |       | ZMYM2    | 19.4 | ECA17 |          |      |       | LAMP1    | 114.7 | ECA17 |
| PTR14           | 106 |           |      |       | NP       | 19.4 | ECA1  |          |      |       | CDC42BPB | 103.3 | ECA24 |
| PTR15           | 100 |           |      |       | NDN      | 21.1 | ECA1  |          |      |       | TM2D3    | 99.70 | ECA1  |
| PTR16           | 89  | ERAF      | 31.9 | ECA13 | PHKB     | 46.6 | ECA3  | HBA1     | 0.1  | ECA13 | GAS8     | 90.4  | ECA3  |
| PTR17           | 79  | inversion |      | ECA11 | TNFAIP1  | 29.0 | ECA11 | GEMIN4   | 0.6  | ECA11 | CSNK1D   | 82.4  | ECA11 |
| PTR18           | 76  | RBBP8     | 18.7 | ECA8  | NPC1     | 19.3 | ECA8  | MPPE1    | 4.6  | ECA8  | GALR1    | 74.1  | ECA8  |
| PTR19           | 64  | FKBP8     | 18.9 | ECA21 | POP4     | 34.9 | ECA10 | C19orf19 | 0.3  | ECA7  | RPS5     | 64.2  | ECA10 |
| PTR20           | 62  | CRNKL1    | 20.2 | ECA22 | BCL2L1   | 28.5 | ECA22 | TCF15    | 0.5  | ECA22 | SOX18    | 62.0  | ECA22 |
| PTR21           | 46  |           |      |       | USP25    | 15.8 | ECA26 |          |      |       | S100B    | 46.2  | ECA26 |
| PTR22           | 49  |           |      |       | DGCR14   | 17.5 | ECA8  |          |      |       | ARSA     | 49.9  | ECA28 |
| PTRX            | 154 | JARID1C   | 53.6 | ECAX  | ASB12    | 63.4 | ECAX  | PLCXD1   | 0.07 | ECAX  | SPRY3    | 155.1 | ECAX  |
| <b>Dog Chr.</b> |     |           |      |       |          |      |       |          |      |       |          |       |       |
| CFA1            | 125 |           |      |       | GALR1    | 5.7  | ECA8  |          |      |       | POP4     | 124.7 | ECA10 |
| CFA2            | 88  |           |      |       | CREM     | 4.7  | ECA29 |          |      |       | MAD2L2   | 87.4  | ECA2  |
| CFA3            | 94  |           |      |       | CAMK4    | 4.0  | ECA14 |          |      |       | PPARGC1A | 89.0  | ECA3  |
| CFA4            | 91  |           |      |       | ZNF248   | 3.1  | ECA1  |          |      |       | FBXL7    | 90.5  | ECA21 |
| CFA5            | 91  |           |      |       | OPCML    | 5.7  | ECA7  |          |      |       | CBFB     | 85.3  | ECA3  |
| CFA6            | 80  |           |      |       | CCT6A    | 3.5  | ECA13 |          |      |       | DEPDC1   | 79.9  | ECA5  |
| CFA7            | 83  |           |      |       | CYB5R1   | 3.2  | ECA30 |          |      |       | MPPE1    | 80.5  | ECA8  |
| CFA8            | 77  |           |      |       | CHGA     | 4.9  | ECA24 |          |      |       | CDC42BPB | 73.8  | ECA24 |
| CFA9            | 64  |           |      |       | CSNK1D   | 3    | ECA11 |          |      |       | GGTA1    | 64.3  | ECA25 |
| CFA10           | 72  |           |      |       | CD63     | 3.1  | ECA6  |          |      |       | ADD2     | 72.20 | ECA15 |
| CFA11           | 77  |           |      |       | MGAT1    | 3.1  | ECA14 |          |      |       | STOM     | 77.   | ECA25 |
| CFA12           | 75  |           |      |       | ELA-A    | 4.0  | ECA20 |          |      |       | COL10A1  | 74.8  | ECA10 |
| CFA13           | 66  |           |      |       | RNF19    | 5.1  | ECA9  |          |      |       | CXCL6    | 65.4  | ECA3  |
| CFA14           | 63  |           |      |       | AKR1B1   | 5.9  | ECA4  |          |      |       | CADPS2   | 63.0  | ECA4  |
| CFA15           | 67  |           |      |       | SLC2A1   | 3.4  | ECA2  |          |      |       | KLHL2    | 64.2  | ECA2  |
| CFA16           | 62  |           |      |       | CLCN1    | 9.3  | ECA4  |          |      |       | SPAG11B  | 61.9  | ECA27 |
| CFA17           | 67  |           |      |       | MYT1L    | 3.8  | ECA15 |          |      |       | OVGP1    | 67.0  | ECA5  |
| CFA18           | 58  |           |      |       | COBL     | 5.1  | ECA4  |          |      |       | SCGB1A1  | 57.2  | ECA12 |
| CFA19           | 56  |           |      |       | ZNF330   | 4.7  | ECA2  |          |      |       | PRPF40A  | 56.8  | ECA18 |
| CFA20           | 61  |           |      |       | GPR175   | 4.6  | ECA16 |          |      |       | C19orf19 | 61.1  | ECA7  |
| CFA21           | 54  |           |      |       | PGR      | 3.4  | ECA7  |          |      |       | MS4A1    | 53.9  | ECA12 |
| CFA22           | 64  |           |      |       | CCDC70   | 3.2  | ECA17 |          |      |       | CDC16    | 64.1  | ECA17 |

|                    |     |         |      |      |         |      |       |        |     |      |          |       |       |
|--------------------|-----|---------|------|------|---------|------|-------|--------|-----|------|----------|-------|-------|
| CFA23              | 55  |         |      |      | TMEM16K | 5.6  | ECA16 |        |     |      | MBNL1    | 49.8  | ECA16 |
| CFA24              | 50  |         |      |      | NAPB    | 3.2  | ECA22 |        |     |      | SOX18    | 50.5  | ECA22 |
| CFA25              | 54  |         |      |      | VPS36   | 3.1  | ECA17 |        |     |      | HDLBP    | 54.1  | ECA6  |
| CFA26              | 42  |         |      |      | SFRS8   | 4.0  | ECA8  |        |     |      | ACTA2    | 41.7  | ECA1  |
| CFA27              | 48  |         |      |      | PRR13   | 4.7  | ECA6  |        |     |      | ATP6V1E1 | 48.2  | ECA6  |
| CFA28              | 44  |         |      |      | ALOX5   | 5.1  | ECA1  |        |     |      | TXNL2    | 41.7  | ECA1  |
| CFA29              | 44  |         |      |      | PRKDC   | 3.0  | ECA9  |        |     |      | MTDH     | 44.6  | ECA9  |
| CFA30              | 43  |         |      |      | RYR3    | 4.1  | ECA1  |        |     |      | TSPAN3   | 42.2  | ECA1  |
| CFA31              | 42  |         |      |      | CGGBP1  | 3.2  | ECA26 |        |     |      | S100B    | 32.2  | ECA26 |
| CFA32              | 41  |         |      |      | THAP6   | 3.0  | ECA3  |        |     |      | FABP2    | 43.5  | ECA2  |
| CFA33              | 34  |         |      |      | PROS1   | 4.6  | ECA19 |        |     |      | TFRC     | 32.2  | ECA19 |
| CFA34              | 45  |         |      |      | TRIO    | 3.2  | ECA21 |        |     |      | TBL1XR1  | 43.5  | ECA19 |
| CFA35              | 29  |         |      |      | EXOC2   | 3.8  | ECA20 |        |     |      | TRIM27   | 28.9  | ECA20 |
| CFA36              | 33  |         |      |      | PSCDBP  | 6.4  | ECA18 |        |     |      | COL3A1   | 33.6  | ECA18 |
| CFA37              | 33  |         |      |      | GDF8    | 3.7  | ECA18 |        |     |      | CLN8     | 33.8  | ECA27 |
| CFA38              | 26  |         |      |      | ZC3H11A | 3.4  | ECA30 |        |     |      | DUSP10   | 26.3  | ECA30 |
| CFAX               | 126 | JARID1C | 44.9 | ECAX | ASB12   | 52.3 | ECAX  | PLCXD1 | 0.1 | ECAX | SYBL1    | 126.7 | ECAX  |
| <b>Cattle Chr.</b> |     |         |      |      |         |      |       |        |     |      |          |       |       |
| BTA1               | 146 |         |      |      | DSCR1   | 0.3  | ECA26 |        |     |      | PCAF     | 160.8 | ECA16 |
| BTA2               | 125 |         |      |      | PROC    | 5.2  | ECA18 |        |     |      | ATP13A2  | 140.2 | ECA2  |
| BTA3               | 116 |         |      |      | TMCO1   | 3.8  | ECA5  |        |     |      | GPR175   | 127.9 | ECA16 |
| BTA4               | 110 |         |      |      | COBL    | 4.6  | ECA4  |        |     |      | DNAJB6   | 122.9 | ECA4  |
| BTA5               | 118 |         |      |      | TSPAN8  | 0.8  | ECA6  |        |     |      | PPARA    | 123.3 | ECA28 |
| BTA6               | 111 |         |      |      | FABP2   | 6.8  | ECA2  |        |     |      | GRPEL1   | 121.6 | ECA3  |
| BTA7               | 100 |         |      |      | SQSTM1  | 1.4  | ECA14 |        |     |      | SLC25A46 | 111.8 | ECA14 |
| BTA8               | 103 |         |      |      | CBR4    | 0.8  | ECA2  |        |     |      | STOM     | 116.3 | ECA25 |
| BTA9               | 95  |         |      |      | COL19A1 | 8.2  | ECA20 |        |     |      | THBS2    | 107.1 | ECA31 |
| BTA10              | 95  |         |      |      | YTHDC2  | 1.9  | ECA14 |        |     |      | B2M      | 106.1 | ECA1  |
| BTA11              | 101 |         |      |      | MERTK   | 0.4  | ECA15 |        |     |      | DBH      | 108.4 | ECA25 |
| BTA12              | 77  |         |      |      | PCDH17  | 3.6  | ECA17 |        |     |      | CDC16    | 85.2  | ECA17 |
| BTA13              | 83  |         |      |      | PLCB1   | 0.8  | ECA22 |        |     |      | DOK5     | 83.1  | ECA22 |
| BTA14              | 82  |         |      |      | RPL8    | 0.1  | ECA09 |        |     |      | CA3      | 75.9  | ECA9  |
| BTA15              | 75  |         |      |      | CASP1   | 2.1  | ECA07 |        |     |      | MS4A2    | 84.2  | ECA12 |
| BTA16              | 72  |         |      |      | ZC3H11A | 0.6  | ECA30 |        |     |      | CYB5R1   | 77.9  | ECA30 |
| BTA17              | 70  |         |      |      | KLHL2   | 0.3  | ECA2  |        |     |      | COMT     | 76.2  | ECA8  |
| BTA18              | 62  |         |      |      | VAC14   | 0.8  | ECA3  |        |     |      | RPS5     | 65.9  | ECA10 |
| BTA19              | 63  |         |      |      | HLF     | 4.6  | ECA11 |        |     |      | SOX9     | 60.8  | ECA11 |
| BTA20              | 68  |         |      |      | LCP2    | 1.0  | ECA14 |        |     |      | POLS     | 70.3  | ECA21 |
| BTA21              | 63  |         |      |      | UBE3A   | 0.3  | ECA1  |        |     |      | CDC42BPB | 67.7  | ECA24 |
| BTA22              | 59  |         |      |      | PGAM2   | 0.1  | ECA4  |        |     |      | COPG     | 60.9  | ECA16 |

|                   |     |  |  |  |          |      |       |  |  |  |          |        |       |
|-------------------|-----|--|--|--|----------|------|-------|--|--|--|----------|--------|-------|
| BTA23             | 48  |  |  |  | GCLC     | 7.2  | ECA20 |  |  |  | EXOC2    | 53     | ECA20 |
| BTA24             | 60  |  |  |  | ATP9B    | 0.6  | ECA8  |  |  |  | BCL2     | 64     | ECA8  |
| BTA25             | 42  |  |  |  | HBA1     | 0.6  | ECA13 |  |  |  | GPR30    | 43.6   | ECA13 |
| BTA26             | 47  |  |  |  | ZWINT    | 2.4  | ECA1  |  |  |  | TXNL2    | 50.1   | ECA1  |
| BTA27             | 43  |  |  |  | CLN8     | 1.1  | ECA27 |  |  |  | TOP2B    | 48.3   | ECA16 |
| BTA28             | 40  |  |  |  | IRF2BP2  | 5.8  | ECA1  |  |  |  | AGT      | 46     | ECA1  |
| BTA29             | 45  |  |  |  | TYR      | 6.4  | ECA7  |  |  |  | IGF2     | 51.3   | ECA12 |
| BTAX              | 99  |  |  |  | LAMP2    | 0.4  | ECAX  |  |  |  | PRKX     | 87.8   | ECAX  |
| <b>Mouse Chr.</b> |     |  |  |  |          |      |       |  |  |  |          |        |       |
| MMU1              | 197 |  |  |  | COPS5    | 10.0 | ECA9  |  |  |  | LAMB3    | 195.0  | ECA5  |
| MMU2              | 181 |  |  |  | FRMD4A   | 4.3  | ECA29 |  |  |  | SOX18    | 181.5  | ECA22 |
| MMU3              | 159 |  |  |  | PKIA     | 7.3  | ECA9  |  |  |  | DEPDC1   | 159.4  | ECA5  |
| MMU4              | 155 |  |  |  | RPS20    | 3.7  | ECA9  |  |  |  | TNFRSF18 | 154.8  | ECA2  |
| MMU5              | 152 |  |  |  | AKAP9    | 3.9  | ECA4  |  |  |  | STARD13  | 151.3  | ECA17 |
| MMU6              | 149 |  |  |  | CCDC132  | 3.4  | ECA4  |  |  |  | MGC50559 | 149.1  | ECA6  |
| MMU7              | 152 |  |  |  | LILRA5   | 3.3  | ECA10 |  |  |  | NADSYN1  | 143.6  | ECA12 |
| MMU8              | 131 |  |  |  | INSR     | 3.1  | ECA7  |  |  |  | IRF2BP2  | 143.6  | ECA1  |
| MMU9              | 124 |  |  |  | CASP1    | 5.2  | ECA7  |  |  |  | SLC6A20  | 123.4  | ECA16 |
| MMU10             | 129 |  |  |  | VIP      | 4.6  | ECA31 |  |  |  | CD63     | 128.3  | ECA6  |
| MMU11             | 121 |  |  |  | LIMK2    | 3.2  | ECA8  |  |  |  | CSNK1D   | 120.7  | ECA11 |
| MMU12             | 121 |  |  |  | RAB10    | 3.2  | ECA15 |  |  |  | ITGB8    | 119.6  | ECA4  |
| MMU13             | 120 |  |  |  | GDI2     | 3.5  | ECA29 |  |  |  | NNT      | 120.4  | ECA21 |
| MMU14             | 125 |  |  |  | PSMD6    | 12.9 | ECA16 |  |  |  | FGF14    | 123.1  | ECA17 |
| MMU15             | 103 |  |  |  | GHR      | 3.2  | ECA21 |  |  |  | PRR13    | 102.20 | ECA6  |
| MMU16             | 98  |  |  |  | CREBBP   | 3.9  | ECA13 |  |  |  | MX1      | 97.5   | ECA26 |
| MMU17             | 95  |  |  |  | SNX9     | 5.7  | ECA31 |  |  |  | PJA2     | 93.0   | ECA14 |
| MMU18             | 90  |  |  |  | CREM     | 3.2  | ECA29 |  |  |  | CNDP2    | 84.8   | ECA8  |
| MMU19             | 61  |  |  |  | ADRBK1   | 4.2  | ECA12 |  |  |  | EIF3S10  | 60.8   | ECA1  |
| MMUX              | 166 |  |  |  | NUDT11   | 5.2  | ECAX  |  |  |  | MID1     | 165.2  | ECAX  |
| <b>Rat Chr.</b>   |     |  |  |  |          |      |       |  |  |  |          |        |       |
| RNO1              | 267 |  |  |  | PCMT1    | 2.2  | ECA31 |  |  |  | EIF3S10  | 267.3  | ECA1  |
| RNO2              | 258 |  |  |  | PCSK1    | 1.9  | ECA14 |  |  |  | DEPDC1   | 257.7  | ECA5  |
| RNO3              | 171 |  |  |  | SURF2    | 5.8  | ECA25 |  |  |  | SOX18    | 170.8  | ECA22 |
| RNO4              | 187 |  |  |  | IL6      | 0.4  | ECA4  |  |  |  | MGC50559 | 186.5  | ECA6  |
| RNO5              | 173 |  |  |  | CRISPLD1 | 0.3  | ECA9  |  |  |  | ISG15    | 173.0  | ECA2  |
| RNO6              | 147 |  |  |  | EIF2AK2  | 0.09 | ECA15 |  |  |  | ITGB8    | 146.4  | ECA4  |
| RNO7              | 143 |  |  |  | PTGES3   | 1.3  | ECA6  |  |  |  | PRR13    | 141.20 | ECA6  |
| RNO8              | 129 |  |  |  | CASP1    | 2.0  | ECA7  |  |  |  | SLC6A20  | 128.4  | ECA16 |
| RNO9              | 113 |  |  |  | PCAF     | 0.8  | ECA16 |  |  |  | TYMS     | 112.6  | ECA8  |
| RNO10             | 110 |  |  |  | BFAR     | 0.01 | ECA13 |  |  |  | CSNK1D   | 110.1  | ECA11 |

|                     |     |  |  |  |        |      |       |          |      |       |        |        |       |
|---------------------|-----|--|--|--|--------|------|-------|----------|------|-------|--------|--------|-------|
| RNO11               | 87  |  |  |  | CGGBP1 | 2.1  | ECA26 |          |      |       | MCM4   | 87.1   | ECA9  |
| RNO12               | 46  |  |  |  | INSR   | 2.9  | ECA7  |          |      |       | SART3  | 43.9   | ECA8  |
| RNO13               | 111 |  |  |  | n/a    |      | ECA18 |          |      |       | LAMB3  | 109.1  | ECA5  |
| RNO14               | 112 |  |  |  | UBE2D2 | 2.4  | ECA14 |          |      |       | ACYP2  | 111.7  | ECA15 |
| RNO15               | 109 |  |  |  | DLG5   | 0.07 | ECA1  |          |      |       | FGF14  | 109.0  | ECA17 |
| RNO16               | 90  |  |  |  | RPS24  | 0.04 | ECA1  |          |      |       | EFNB2  | 86.10  | ECA17 |
| RNO17               | 97  |  |  |  | POLS   | 3.8  | ECA21 |          |      |       | MASTL  | 96.70  | ECA29 |
| RNO18               | 87  |  |  |  | ROCK1  | 1.3  | ECA8  |          |      |       | CYB5A  | 81.20  | ECA8  |
| RNO19               | 59  |  |  |  | GOT2   | 9.6  | ECA3  |          |      |       | GNPAT  | 55.0   | ECA1  |
| RNO20               | 55  |  |  |  | CLIC2  | 0.07 | ECAX  |          |      |       | PREP   | 49.0   | ECA10 |
| RNOX                | 160 |  |  |  | WDR40B | 0.6  | ECAX  |          |      |       | RPL10  | 160.3  | ECAX  |
| <b>Opossum Chr.</b> |     |  |  |  |        |      |       |          |      |       |        |        |       |
| MDO1                | 748 |  |  |  |        |      |       | TXNL2    | 0.2  | ECA1  | ITSN2  | 746.3  | ECA15 |
| MDO2                | 541 |  |  |  |        |      |       | ACADM    | 1.4  | ECA5  | ABCF3  | 537.8  | ECA19 |
| MDO3                | 527 |  |  |  |        |      |       | CHD1     | 1.3  | ECA14 | PES1   | 525.4  | ECA8  |
| MDO4                | 435 |  |  |  |        |      |       | SH3BGR   | 3.1  | ECA26 | MATN1  | 426.5  | ECA2  |
| MDO5                | 304 |  |  |  |        |      |       | PGRMC2   | 1.5  | ECA2  | ACTN3  | 307.2  | ECA12 |
| MDO6                | 292 |  |  |  |        |      |       | PPIC     | 3.30 | ECA14 | BBS9   | 244.6  | ECA4  |
| MDO7                | 260 |  |  |  |        |      |       | LONRF3   | 0.30 | ECAX  | IL12A  | 260.6  | ECA19 |
| MDO8                | 312 |  |  |  |        |      |       | C1QDC1   | 7.87 | ECA6  | SCIN   | 307.10 | ECA4  |
| MDOX                | 79  |  |  |  |        |      |       | JARID1C  | 3.10 | ECAX  | RPL10  | 60.60  | ECAX  |
| <b>Chicken Chr.</b> |     |  |  |  |        |      |       |          |      |       |        |        |       |
| GGA1                | 200 |  |  |  |        |      |       | ARSA     | 0.11 | ECA28 | UCP3   | 200.50 | ECA7  |
| GGA2                | 154 |  |  |  |        |      |       | ABCF2    | 0.1  | ECA4  | SCRIB  | 154.70 | ECA9  |
| GGA3                | 113 |  |  |  |        |      |       | EFEMP1   | 0.20 | ECA15 | RUNX2  | 112.10 | ECA20 |
| GGA4                | 94  |  |  |  |        |      |       | KIAA1166 | 0.03 | ECAX  | CNO    | 93.20  | ECA3  |
| GGA5                | 62  |  |  |  |        |      |       | IFITM3   | 1.60 | ECA12 | FKBP3  | 61.30  | ECA1  |
| GGA6                | 37  |  |  |  |        |      |       | MMRN2    | 3.00 | ECA1  | GLUD1  | 36.40  | ECA1  |
| GGA7                | 38  |  |  |  |        |      |       | GDF8     | 0.10 | ECA18 | BAZ2B  | 38.10  | ECA18 |
| GGA8                | 30  |  |  |  |        |      |       | ZNF281   | 1.50 | ECA30 | ZRANB2 | 29.90  | ECA5  |
| GGA9                | 25  |  |  |  |        |      |       | STAG1    | 1.70 | ECA16 | CP     | 25.40  | ECA16 |
| GGA10               | 22  |  |  |  |        |      |       | ALPK3    | 0.25 | ECA1  | GRP58  | 22.20  | ECA1  |
| GGAZ                | 74  |  |  |  |        |      |       | NARS     | 0.2  | ECA8  | PPIC   | 73.90  | ECA14 |
