# Supplementary material
Source: publisher figshare collection journal article supplement (https://karger.figshare.com/articles/dataset/_/5120452)
Supplement: Supplementary file 4 [file 1]

**Supplementary Table 2. RH II maps for individual horse chromosomes in tabular form along with comparative information from the human sequence map.**

| <b>Horse Chr.</b> | <b>Marker</b> | <b>Map Position (cR)</b> | <b>Placement LOD</b> | <b>Assignment</b> | <b>Human Chr.</b> | <b>Human Mb (Build 36.1)</b> |
|-------------------|---------------|--------------------------|----------------------|-------------------|-------------------|------------------------------|
| 1                 | FGFR2         | 0                        | 0.56                 | placed            | HSA10             | 123.23                       |
| 1                 | HTRA1         | 9.38                     | 1.51                 | frame             | HSA10             | 124.21                       |
| 1                 | PRLHR         | 40.79                    | 1.51                 | frame             | HSA10             | 120.34                       |
| 1                 | 1CA30         | 40.79                    | 1.51                 | frame_identical   | HSA10             | 120                          |
| 1                 | EIF3S10       | 49.14                    | 2.28                 | placed            | HSA10             | 120.78                       |
| 1                 | UMNe448       | 67.38                    | 0.71                 | placed            |                   |                              |
| 1                 | TKY1043       | 108.88                   | 0.18                 | placed            | HSA10             | 118.8                        |
| 1                 | PNLIPRP2      | 117.23                   | 1.89                 | frame             | HSA10             | 118.37                       |
| 1                 | TKY1016       | 117.23                   | 1.89                 | frame_identical   |                   |                              |
| 1                 | NHLRC2        | 158.41                   | 1.13                 | frame             | HSA10             | 115.60                       |
| 1                 | CASP7         | 166.71                   | 1.39                 | placed            | HSA10             | 115.43                       |
| 1                 | ASB41         | 173.54                   | 1.13                 | frame             | HSA10             | 115.2                        |
| 1                 | ZDHHC6        | 197.77                   | 0.11                 | placed            | HSA10             | 114.18                       |
| 1                 | LEX039        | 214.06                   | 3.09                 | frame             | HSA10             | 113.9                        |
| 1                 | LEX020        | 247.3                    | 0.96                 | placed            | HSA10             | 112.5                        |
| 1                 | ADD3          | 259.77                   | 3.51                 | frame             | HSA10             | 111.76                       |
| 1                 | XPNPEP1       | 280.12                   | 3.51                 | frame             | HSA10             | 111.61                       |
| 1                 | UMNe467       | 293.79                   | 3.13                 | placed            |                   |                              |
| 1                 | VIASH034      | ---                      | [HTRA1 - PNLIPRP2]   | binned            |                   |                              |
| 1                 | HP27          | ---                      | [HTRA1 - PNLIPRP2]   | binned            |                   |                              |
| 1                 | TKY812        | ---                      | [PRLHR - NHLRC2]     | binned            | HSA10             | 118.8                        |
| 1                 | LEX030        | ---                      | [PRLHR - NHLRC2]     | binned            | HSA10             | 118.5                        |
| 1                 | 1CA44         | ---                      | [HTRA1 - PNLIPRP2]   | binned            | HSA10             | 122.5                        |
| 1                 | BAG3          | ---                      | [HTRA1 - PNLIPRP2]   | binned            | HSA10             | 121.40                       |
| 1                 | TKY318        | 0                        | 1.46                 | frame             | HSA10             | 103.4                        |
| 1                 | UMNe086       | 19.54                    | 2.06                 | placed            |                   |                              |
| 1                 | HIF1AN        | 31.67                    | 1.46                 | frame             | HSA10             | 102.29                       |
| 1                 | NDUFB8        | 31.67                    | 1.46                 | frame_identical   | HSA10             | 102.27                       |
| 1                 | DNMBP         | 31.67                    | 1.46                 | frame_identical   | HSA10             | 101.63                       |
| 1                 | PI4KII        | 57.58                    | 5.07                 | frame             | HSA10             | 99.39                        |
| 1                 | ANKRD2        | 57.58                    | 5.07                 | frame_identical   | HSA10             | 99.32                        |
| 1                 | TKY597        | 57.58                    | 5.07                 | frame_identical   | HSA10             | 99.6                         |
| 1                 | EXOSC1        | 57.58                    | 5.07                 | frame_identical   | HSA10             | 99.18                        |
| 1                 | SLIT1         | 62.91                    | 2.02                 | placed            | HSA10             | 98.75                        |
| 1                 | UMNe111       | 92.77                    | 3.2                  | frame             |                   |                              |
| 1                 | SORBS1        | 104.91                   | 2.4                  | placed            | HSA10             | 97.06                        |
| 1                 | PDLIM1        | 118.01                   | 3.2                  | frame             | HSA10             | 96.99                        |
| 1                 | PPP1R3C       | 166.86                   | 0.11                 | placed            | HSA10             | 93.38                        |
| 1                 | ANKRD1        | 175.65                   | 2.41                 | frame             | HSA10             | 92.66                        |

|   |                      |        |                                        |                 |       |        |
|---|----------------------|--------|----------------------------------------|-----------------|-------|--------|
| 1 | TKY702               | 182.83 | 0.4                                    | placed          | HSA10 | 92.4   |
| 1 | GOT1                 | ---    | [PI4KII -<br>TKY318]                   | binned          | HSA10 | 101.15 |
| 1 | IDE                  | ---    | [p-terminal -<br>PDLIM1]               | binned          | HSA10 | 94.20  |
| 1 | TKY707               | ---    | [p-terminal -<br>PDLIM1]               | binned          | HSA10 | 92.8   |
| 1 | ACTA2                | 0      | 0                                      | frame           | HSA10 | 90.68  |
| 1 | UMNe334/420          | 16.72  | 1.26                                   | placed          |       |        |
| 1 | TMEM23               | 24.31  | 0                                      | frame           | HSA10 | 51.74  |
| 1 | AHT026               | 24.31  | 0                                      | frame_identical |       |        |
| 1 | MINPP1               | 32.72  | 1.56                                   | placed          | HSA10 | 89.25  |
| 1 | ACF                  | ---    | [ACTA2 - q-<br>terminal]               | binned          | HSA10 | 52.24  |
| 1 | ZWINT                | 0      | 2.53                                   | frame           | HSA10 | 57.79  |
| 1 | CH241-<br>102F21_SP6 | 23.08  | 3.56                                   | frame           | HSA10 | 59.5   |
| 1 | ANK3                 | 46.82  | 3.84                                   | frame           | HSA10 | 61.46  |
| 1 | UMNe591              | 63.53  | 2.29                                   | placed          | HSA10 | 61.9   |
| 1 | RHOBTB1              | 75.51  | 0.59                                   | frame           | HSA10 | 62.30  |
| 1 | COR100               | 75.51  | 0.59                                   | frame_identical | HSA10 | 62.8   |
| 1 | TKY659               | 81.96  | 0.19                                   | placed          | HSA10 | 63.3   |
| 1 | COR079               | 81.96  | 0.24                                   | placed          | HSA10 | 63.2   |
| 1 | NRBF2                | 93.94  | 0.59                                   | frame           | HSA10 | 64.56  |
| 1 | EGR2                 | 93.94  | 0.59                                   | frame_identical | HSA10 | 64.24  |
| 1 | NVHEQ031             | 93.94  | 0.59                                   | frame_identical | HSA10 | 64     |
| 1 | 1CA22                | ---    | [CH241-<br>102F21_SP6 -<br>q-terminal] | binned          | HSA10 | 59.1   |
| 1 | TKY791               | ---    | [NRBF2 -<br>ANK3]                      | binned          | HSA10 | 63.1   |
| 1 | COR059               | 0      | 0.67                                   | placed          |       |        |
| 1 | SRGN                 | 5.35   | 3.08                                   | frame           | HSA10 | 70.52  |
| 1 | UMNe120              | 5.35   | 3.08                                   | frame_identical |       |        |
| 1 | SUPV3L1              | 11.04  | 0.77                                   | placed          |       |        |
| 1 | COL13A1              | 17.15  | 1.68                                   | placed          | HSA10 | 71.23  |
| 1 | HK1                  | 17.15  | 1.68                                   | placed          | HSA10 | 70.70  |
| 1 | SAR1A                | 23.75  | 2.18                                   | placed          | HSA10 | 71.58  |
| 1 | PRF1                 | 30.35  | 3.08                                   | frame           | HSA10 | 72.03  |
| 1 | CDH23                | 42.53  | 2                                      | placed          | HSA10 | 72.83  |
| 1 | TKY007               | 42.53  | 2                                      | placed          | HSA10 | 73.4   |
| 1 | PSAP                 | 42.53  | 2                                      | placed          | HSA10 | 73.25  |
| 1 | AHT113               | 65.15  | 3.85                                   | frame           |       |        |
| 1 | ANXA7                | 75.2   | 0.31                                   | placed          | HSA10 | 74.81  |
| 1 | VCL                  | 79.97  | 3.85                                   | frame           | HSA10 | 75.43  |
| 1 | UMNe090              | 79.97  | 3.85                                   | frame_identical |       |        |
| 1 | PLAU                 | 79.97  | 3.85                                   | frame_identical | HSA10 | 75.34  |
| 1 | UM002                | 79.97  | 3.85                                   | frame_identical | HSA10 | 76.7   |

|   |          |        |                       |                 |       |        |
|---|----------|--------|-----------------------|-----------------|-------|--------|
| 1 | VHL134   | 79.97  | 3.85                  | frame_identical |       |        |
| 1 | KCNMA1   | 89.48  | 2.19                  | placed          | HSA10 | 78.30  |
| 1 | TKY2220  | 107.52 | 1.7                   | frame           | HSA10 | 78.9   |
| 1 | TKY886   | 125.55 | 1.7                   | frame           |       |        |
| 1 | DLG5     | 143.59 | 2.44                  | frame           | HSA10 | 79.22  |
| 1 | TKY706   | 155.46 | 3.74                  | frame           |       |        |
| 1 | UCDEQ487 | 184.27 | 2.93                  | frame           |       |        |
| 1 | ANXA11   | 195.7  | 2.93                  | frame           | HSA10 | 81.90  |
| 1 | TKY987   | ---    | [p-terminal - PRF1]   | binned          |       |        |
| 1 | ADK      | ---    | [AHT113 - TKY2220]    | binned          | HSA10 | 75.58  |
| 1 | VDAC2    | ---    | [AHT113 - TKY2220]    | binned          | HSA10 | 76.64  |
| 1 | ZNF248   | 0      | 0.62                  | frame           | HSA10 | 38.16  |
| 1 | HNRPF    | 8.92   | 0.71                  | placed          | HSA10 | 43.20  |
| 1 | CXCL12   | 30.16  | 0.62                  | frame           | HSA10 | 44.19  |
| 1 | UMNe520  | 52.39  | 3.87                  | frame           |       |        |
| 1 | AHT069   | 57.08  | 2.38                  | placed          |       |        |
| 1 | ASB12ms  | 67.54  | 2.28                  | frame           | HSA1  | 225.2  |
| 1 | AGT      | 97.2   | 3.13                  | placed          | HSA1  | 228.90 |
| 1 | TKY015   | ---    | [p-terminal - CXCL12] | binned          | HSA10 | 42.7   |
| 1 | TKY013   | ---    | [p-terminal - CXCL12] | binned          |       |        |
| 1 | RET      | ---    | [p-terminal - CXCL12] | binned          | HSA10 | 42.89  |
| 1 | UMNe196  | 0      | 2.19                  | placed          | HSA1  | 234.9  |
| 1 | RYSR2    | 12.87  | 3.29                  | frame           | HSA1  | 235.27 |
| 1 | ACTN2    | 32.09  | 3.29                  | frame           | HSA1  | 234.92 |
| 1 | ICA01    | 51.31  | 1.99                  | placed          | HSA1  | 232.1  |
| 1 | LYST     | 51.31  | 2.37                  | placed          | HSA1  | 233.89 |
| 1 | TBCE     | 63.18  | 3.7                   | frame           | HSA1  | 233.60 |
| 1 | IRF2BP2  | 85.4   | 0.38                  | placed          | HSA1  | 232.81 |
| 1 | ARID4B   | 107.63 | 0.39                  | placed          | HSA1  | 233.40 |
| 1 | SGCV02   | 128.41 | 3.7                   | frame           | HSA1  | 231.3  |
| 1 | EXOC8    | 196.08 | 0.48                  | placed          | HSA1  | 229.54 |
| 1 | ICA36    | 216.96 | 0.37                  | placed          | HSA1  | 227.8  |
| 1 | GNPAT    | 223.99 | 2.84                  | frame           | HSA1  | 229.44 |
| 1 | UMNe099  | 249.5  | 2.84                  | frame           |       |        |
| 1 | ALOX5    | 273.52 | 1.99                  | placed          | HSA10 | 45.19  |
| 1 | ICA21    | 286.6  | 3.91                  | placed          |       |        |
| 1 | RBP3     | 300.59 | 5.38                  | frame           | HSA10 | 48.00  |
| 1 | GLUD1    | 307.06 | 2.05                  | placed          | HSA10 | 88.80  |
| 1 | SNCG     | 326.28 | 4.32                  | frame           | HSA10 | 88.71  |
| 1 | MMRN2    | 331.88 | 0.23                  | placed          | HSA10 | 88.69  |
| 1 | TKY670   | 342.36 | 4.32                  | frame           | HSA10 | 87.5   |
| 1 | RGR      | 358.08 | 5.64                  | frame           | HSA10 | 85.99  |
| 1 | TKY1005  | 369.23 | 1.34                  | placed          |       |        |
| 1 | SFTPA1   | 410.18 | 4.36                  | frame           | HSA10 | 81.36  |
| 1 | UMNe548  | 410.18 | 4.36                  | frame_identical |       |        |
| 1 | AHT040   | 416.18 | 1.08                  | placed          |       |        |

|   |                      |        |                     |                 |       |        |
|---|----------------------|--------|---------------------|-----------------|-------|--------|
| 1 | AHT021               | 416.18 | 1.08                | placed          |       |        |
| 1 | BTBD1                | 422.66 | 2.37                | placed          | HSA15 | 81.48  |
| 1 | UM041                | 422.66 | 2.37                | placed          |       |        |
| 1 | ALPK3                | 443.54 | 3.31                | frame           | HSA15 | 83.16  |
| 1 | CIB1                 | 473.95 | 3.31                | frame           | HSA15 | 88.57  |
| 1 | FES                  | 473.95 | 3.31                | frame_identical | HSA15 | 89.23  |
| 1 | FURIN                | 473.95 | 3.31                | frame_identical | HSA15 | 89.21  |
| 1 | POLG                 | 488.02 | 2.48                | placed          | HSA15 | 87.66  |
| 1 | MRPS11               | 505.93 | 3.37                | frame           | HSA15 | 86.81  |
| 1 | LEX077               | 553.78 | 1.63                | frame           |       |        |
| 1 | COR046               | 579.28 | 1.63                | frame           |       |        |
| 1 | UMNe318              | 597.11 | 2.32                | placed          |       |        |
| 1 | SLCO3A1              | 603.12 | 1.9                 | frame           | HSA15 | 90.20  |
| 1 | TKY374               | 603.12 | 1.9                 | frame_identical | HSA15 | 90     |
| 1 | CHD2                 | 609.59 | 0.9                 | placed          | HSA15 | 91.24  |
| 1 | ASB08                | 616.62 | 0.34                | placed          | HSA15 | 92.3   |
| 1 | TKY492               | 616.62 | 0.34                | placed          | HSA15 | 92.4   |
| 1 | 1CA32                | 623.66 | 1.9                 | frame           | HSA15 | 93     |
| 1 | TKY941               | 637.65 | 2.13                | placed          | HSA15 | 94.1   |
| 1 | 1STS01               | 675.48 | 1.77                | placed          |       |        |
| 1 | ARRDC4               | 694.7  | 3.48                | frame           | HSA15 | 96.30  |
| 1 | 1CA20                | 694.7  | 3.48                | frame_identical | HSA15 | 95.2   |
| 1 | UMNe498              | 705.85 | 1.63                | placed          |       |        |
| 1 | IGF1R                | 731.47 | 0.96                | placed          | HSA15 | 97.01  |
| 1 | ALDH1A3              | 750.55 | 1.84                | placed          | HSA15 | 99.24  |
| 1 | CHSY1                | 755.81 | 1.91                | placed          | HSA15 | 99.53  |
| 1 | TM2D3                | 761.41 | 2.55                | frame           | HSA15 | 100.00 |
| 1 | 1CA28                | 761.41 | 2.55                | frame_identical |       |        |
| 1 | TKY1020              | 767.84 | 1.76                | placed          | HSA15 | 99.7   |
| 1 | TJP1                 | 780.62 | 1.95                | placed          | HSA15 | 27.78  |
| 1 | TKY1077              | 791.1  | 4.56                | placed          |       |        |
| 1 | 1CA43                | 814.77 | 0.53                | placed          |       |        |
| 1 | NDN                  | 826.71 | 0.57                | frame           | HSA15 | 21.48  |
| 1 | TKY002               | 843.36 | 0.57                | frame           |       |        |
| 1 | TKY899               | ---    | [TBCE -<br>GNPAT]   | binned          | HSA1  | 234.1  |
| 1 | CH241-<br>102E24_SP6 | ---    | [TBCE -<br>GNPAT]   | binned          |       |        |
| 1 | UMNe247              | ---    | [UMNe099 -<br>SNCG] | binned          | HSA10 | 49     |
| 1 | TKY530               | ---    | [RGR -<br>ALPK3]    | binned          | HSA15 | 78.4   |
| 1 | SGCV25               | ---    | [RGR -<br>ALPK3]    | binned          |       |        |
| 1 | RPS17                | ---    | [SFTPA1 -<br>CIB1]  | binned          | HSA15 | 80.61  |
| 1 | LEX058               | ---    | [1CA32 -<br>TM2D3]  | binned          | HSA15 | 95.2   |
| 1 | TKY776               | ---    | [COR046 -<br>1CA32] | binned          | HSA15 | 89.7   |
| 1 | UMNe471              | ---    | [COR046 -<br>1CA32] | binned          | HSA15 | 90.1   |

|   |             |        |                       |                 |       |       |
|---|-------------|--------|-----------------------|-----------------|-------|-------|
| 1 | 1CA41/1CA24 | ---    | [LEX077 -<br>SLCO3A1] | binned          | HSA15 | 89.4  |
| 1 | MCEE        | ---    | [TM2D3 -<br>TKY002]   | binned          | HSA2  | 71.19 |
| 1 | HERC2       | 0      | 4.48                  | frame           | HSA15 | 26.03 |
| 1 | TKY933      | 6.99   | 1.38                  | placed          |       |       |
| 1 | TMED3       | 19.81  | 4.08                  | placed          | HSA15 | 77.39 |
| 1 | IREB2       | 19.81  | 4.08                  | placed          | HSA15 | 76.52 |
| 1 | NRG4        | 19.81  | 4.08                  | placed          | HSA15 | 74.02 |
| 1 | FAH         | 19.81  | 4.08                  | placed          | HSA15 | 78.23 |
| 1 | TSPAN3      | 32.62  | 4.48                  | frame           | HSA15 | 75.13 |
| 1 | 1CA25       | 39.06  | 2.06                  | placed          |       |       |
| 1 | NEIL1       | 45.5   | 4.08                  | placed          | HSA15 | 73.43 |
| 1 | TKY106      | 51.94  | 2.09                  | placed          |       |       |
| 1 | CLK3        | 57.91  | 6.01                  | frame           | HSA15 | 72.69 |
| 1 | UCDEQ493    | 57.91  | 6.01                  | frame_identical |       |       |
| 1 | LOXL1       | 63.49  | 2.12                  | placed          | HSA15 | 72.01 |
| 1 | RPLP1       | 69.07  | 4.1                   | placed          | HSA15 | 67.53 |
| 1 | UM043       | 69.07  | 4.1                   | placed          |       |       |
| 1 | NEO1        | 69.07  | 4.1                   | placed          | HSA15 | 71.13 |
| 1 | LARP6       | 85.67  | 1.83                  | frame           | HSA15 | 68.91 |
| 1 | PKM2        | 95.52  | 0.42                  | placed          | HSA15 | 70.28 |
| 1 | UACA        | 100.2  | 1.83                  | frame           | HSA15 | 68.73 |
| 1 | TKY980      | 137.03 | 2.24                  | frame           | HSA15 | 69.2  |
| 1 | UMNe381     | 234.49 | 2.26                  | frame           |       |       |
| 1 | TKY405      | 263.69 | 2.26                  | frame           | HSA15 | 65.2  |
| 1 | HTG12       | 287.26 | 1.73                  | frame           |       |       |
| 1 | TKY558      | 306.39 | 4.43                  | placed          | HSA15 | 64    |
| 1 | MAP2K1      | 306.39 | 4.43                  | placed          | HSA15 | 64.47 |
| 1 | SPG21       | 318.29 | 3.88                  | frame           | HSA15 | 63.04 |
| 1 | AHT058      | 318.29 | 3.88                  | frame_identical | HSA15 | 62.6  |
| 1 | TRIP4       | 318.29 | 3.88                  | frame_identical | HSA15 | 62.47 |
| 1 | PPIB        | 323.86 | 0.26                  | placed          | HSA15 | 62.24 |
| 1 | TPM1        | 323.86 | 0.26                  | placed          | HSA15 | 61.12 |
| 1 | TLN2        | 335.76 | 3.88                  | frame           | HSA15 | 60.73 |
| 1 | UM004       | 335.76 | 3.88                  | frame_identical |       |       |
| 1 | LIPC        | 363.33 | 1.9                   | placed          | HSA15 | 56.51 |
| 1 | RORA        | 388.72 | 5.23                  | frame           | HSA15 | 58.58 |
| 1 | ANXA2       | 388.72 | 5.23                  | frame_identical | HSA15 | 58.43 |
| 1 | UCDEQ440    | 388.72 | 5.23                  | frame_identical |       |       |
| 1 | VPS13C      | 388.72 | 5.23                  | frame_identical | HSA15 | 59.93 |
| 1 | MYO5A       | 412.3  | 5.23                  | frame           | HSA15 | 50.39 |
| 1 | HMS15       | 449.94 | 2.07                  | placed          |       |       |
| 1 | TKY410      | 449.94 | 2.07                  | placed          | HSA15 | 50.8  |
| 1 | LYSMD2      | 465.2  | 2.12                  | frame           | HSA15 | 49.80 |
| 1 | UMNe115     | 465.2  | 2.12                  | frame_identical | HSA15 | 49.6  |
| 1 | CYP19A1     | 472.92 | 1.89                  | placed          | HSA15 | 49.29 |
| 1 | SPPL2A      | 480.63 | 0.85                  | placed          | HSA15 | 48.79 |
| 1 | TKY577      | 487.66 | 2.12                  | frame           |       |       |
| 1 | CYP1A2      | ---    | [TSPAN3 -<br>LARP6]   | binned          | HSA15 | 72.83 |

|   |         |        |                           |                 |       |       |
|---|---------|--------|---------------------------|-----------------|-------|-------|
| 1 | GTF2A2  | ---    | [TLN2 - MYO5A]            | binned          | HSA15 | 57.72 |
| 1 | MAPK6   | ---    | [MYO5A - TKY577]          | binned          | HSA15 | 50.10 |
| 1 | CGNL1   | ---    | [TLN2 - LYSMD2]           | binned          | HSA15 | 55.46 |
| 1 | HEST16  | ---    | [MYO5A - TKY577]          | binned          |       |       |
| 1 | TKY534  | ---    | [TSPAN3 - LARP6]          | binned          |       |       |
| 1 | B2M     | 0      | 0                         | frame           | HSA15 | 42.79 |
| 1 | TKY342  | 21.15  | 2.05                      | placed          |       |       |
| 1 | MFAP1   | 33.31  | 0                         | frame           | HSA15 | 41.88 |
| 1 | UMNe486 | 33.31  | 0                         | frame_identical | HSA15 | 41.5  |
| 1 | CEP27   | ---    | [B2M - q-terminal]        | binned          | HSA15 | 40.63 |
| 1 | RPAP1   | 0      | 0                         | frame           | HSA15 | 39.60 |
| 1 | UM026   | 0      | 0                         | frame_identical |       |       |
| 1 | AHT121  | 0      | 0                         | frame_identical |       |       |
| 1 | GCHFR   | ---    | [p-terminal - q-terminal] | binned          | HSA15 | 38.84 |
| 1 | TKY370  | ---    | [p-terminal - q-terminal] | binned          |       |       |
| 1 | ACTC1   | 0      | 0                         | frame           | HSA15 | 32.87 |
| 1 | RYR3    | 0      | 0                         | frame_identical | HSA15 | 31.39 |
| 1 | TKY295  | ---    | [p-terminal - q-terminal] | binned          |       |       |
| 1 | TKY803  | ---    | [p-terminal - q-terminal] | binned          |       |       |
| 1 | ICA16   | 0      | 0.57                      | placed          |       |       |
| 1 | NP      | 7.84   | 0                         | frame           | HSA14 | 20.01 |
| 1 | COR006  | 27.41  | 0.69                      | placed          | HSA14 | 22.9  |
| 1 | MYH6    | 27.41  | 0.7                       | placed          | HSA14 | 22.92 |
| 1 | CMA1    | 37.28  | 0                         | frame           | HSA14 | 24.04 |
| 1 | HMS07   | 37.28  | 0                         | frame_identical |       |       |
| 1 | TKY2278 | ---    | [p-terminal - CMA1]       | binned          | HSA14 | 21.1  |
| 1 | MBIP    | 0      | 0.66                      | placed          | HSA14 | 35.84 |
| 1 | CFL2    | 7.02   | 0.69                      | frame           | HSA14 | 34.25 |
| 1 | PNN     | 32.46  | 0.69                      | frame           | HSA14 | 38.71 |
| 1 | CLEC14A | 32.46  | 0.69                      | frame_identical | HSA14 | 37.79 |
| 1 | TKY281  | 55.6   | 1.07                      | frame           |       |       |
| 1 | FKBP3   | 76.38  | 1.07                      | frame           | HSA14 | 44.65 |
| 1 | ICA40   | 82.8   | 2.34                      | placed          | HSA14 | 46.4  |
| 1 | COR063  | 82.8   | 2.3                       | placed          | HSA14 | 46.4  |
| 1 | TKY1689 | 95.98  | 2.2                       | frame           | HSA14 | 36.6  |
| 1 | COR053  | 113.88 | 4.23                      | frame           |       |       |
| 1 | KLHDC2  | 131.69 | 5.2                       | frame           | HSA14 | 49.30 |
| 1 | TKY728  | 150.89 | 5.46                      | frame           |       |       |
| 1 | TKY704  | 162.08 | 4.12                      | placed          | HSA14 | 49.6  |
| 1 | TKY1785 | 188.33 | 1.52                      | frame           | HSA14 | 50.9  |
| 1 | TKY962  | 203.23 | 1.67                      | placed          |       |       |

|   |        |        |                        |        |       |       |
|---|--------|--------|------------------------|--------|-------|-------|
| 1 | NID2   | 208.49 | 1.52                   | frame  | HSA14 | 51.54 |
| 1 | AHT085 | ---    | [TKY1689 -<br>TKY281]  | binned | HSA14 | 44.1  |
| 1 | TKY466 | ---    | [PNN - q-<br>terminal] | binned | HSA14 | 32.6  |

| <b>Horse<br/>Chr.</b> | <b>Marker</b>       | <b>Map<br/>Position<br/>(cR)</b> | <b>Placement<br/>LOD</b> | <b>Assignment</b> | <b>Human<br/>Chr.</b> | <b>Human<br/>Mb<br/>(Build<br/>36.1)</b> |
|-----------------------|---------------------|----------------------------------|--------------------------|-------------------|-----------------------|------------------------------------------|
| 2                     | 2STS02              | 0                                | 5.75                     | frame             |                       |                                          |
| 2                     | CYP2J2              | 21.82                            | 5.75                     | frame             | HSA1                  | 60.13                                    |
| 2                     | TKY718              | 30.05                            | 1.74                     | placed            |                       |                                          |
| 2                     | COR041/065          | 47.68                            | 7.14                     | frame             | HSA1                  | 58.4                                     |
| 2                     | PRKAA2              | 76.37                            | 2.4                      | frame             | HSA1                  | 56.88                                    |
| 2                     | PPAP2B              | 85.78                            | 2.4                      | frame             | HSA1                  | 56.73                                    |
| 2                     | YIPF1               | 110.68                           | 0.35                     | placed            | HSA1                  | 54.09                                    |
| 2                     | DHCR24              | 128.27                           | 0.26                     | placed            | HSA1                  | 55.09                                    |
| 2                     | COR109              | 131.58                           | 0.13                     | placed            |                       |                                          |
| 2                     | TTC4                | 131.58                           | 0.13                     | placed            | HSA1                  | 54.95                                    |
| 2                     | TMEM59              | 134.8                            | 2.07                     | frame             | HSA1                  | 54.27                                    |
| 2                     | ASB18               | 134.8                            | 2.07                     | frame_identical   | HSA1                  | 54.4                                     |
| 2                     | UMNe563             | 134.8                            | 2.07                     | frame_identical   | HSA1                  | 53.3                                     |
| 2                     | OSBPL9              | 144.18                           | 2.07                     | frame             | HSA1                  | 51.86                                    |
| 2                     | NRD1                | 144.18                           | 2.07                     | frame_identical   | HSA1                  | 52.03                                    |
| 2                     | PRPF38A             | 144.18                           | 2.07                     | frame_identical   | HSA1                  | 52.64                                    |
| 2                     | FAF1                | 156.72                           | 4.72                     | frame             | HSA1                  | 50.68                                    |
| 2                     | TKY384              | 163.13                           | 2.32                     | placed            |                       |                                          |
| 2                     | C1orf165            | 166.42                           | 5.73                     | frame             | HSA1                  | 48.97                                    |
| 2                     | HTG19               | 166.42                           | 5.73                     | frame_identical   |                       |                                          |
| 2                     | CH241-<br>101D21_T7 | 169.7                            | 0.51                     | placed            | HSA1                  | 48.7                                     |
| 2                     | PLK3                | 214.72                           | 2.17                     | frame             | HSA1                  | 45.04                                    |
| 2                     | TKY615              | 223.24                           | 1.5                      | placed            |                       |                                          |
| 2                     | NASP                | 231.32                           | 2.17                     | frame             | HSA1                  | 45.82                                    |
| 2                     | LRRC41              | 239.09                           | 2.39                     | placed            | HSA1                  | 46.52                                    |
| 2                     | FAAH                | 242.97                           | 2.21                     | frame             | HSA1                  | 46.63                                    |
| 2                     | LEPRE1              | 272.34                           | 5.35                     | frame             | HSA1                  | 42.98                                    |
| 2                     | NFYC                | 287.79                           | 5.35                     | frame             | HSA1                  | 40.93                                    |
| 2                     | UMNe433             | 287.79                           | 5.35                     | frame_identical   | HSA1                  | 41.1                                     |
| 2                     | ZMPSTE24            | 313.64                           | 2.27                     | frame             | HSA1                  | 40.50                                    |
| 2                     | CAP1                | 318.04                           | 0.28                     | placed            | HSA1                  | 40.28                                    |
| 2                     | PABPC4              | 327.28                           | 2.27                     | frame             | HSA1                  | 39.80                                    |
| 2                     | MRPS15              | 341.16                           | 2.07                     | placed            | HSA1                  | 36.69                                    |
| 2                     | EIF2C1              | 349.98                           | 4.46                     | frame             | HSA1                  | 36.12                                    |
| 2                     | COR037              | 349.98                           | 4.46                     | frame_identical   | HSA1                  | 35.8                                     |
| 2                     | COR078              | 359.22                           | 2.56                     | placed            | HSA1                  | 34.8                                     |
| 2                     | TKY483              | 359.22                           | 2.56                     | placed            | HSA1                  | 34.7                                     |
| 2                     | TKY003              | 359.22                           | 2.56                     | placed            |                       |                                          |
| 2                     | COR090              | 359.22                           | 3.78                     | placed            |                       |                                          |
| 2                     | CH241-              | 364.39                           | 6                        | frame             | HSA1                  | 33.3                                     |

|   |                  |        |      |                 |      |       |
|---|------------------|--------|------|-----------------|------|-------|
|   | 100K16_T7        |        |      |                 |      |       |
| 2 | TKY024           | 364.39 | 6    | frame_identical |      |       |
| 2 | UMNe554          | 375.28 | 0.85 | placed          |      |       |
| 2 | TKY777           | 398.89 | 2.02 | placed          |      |       |
| 2 | HDAC1            | 398.89 | 2.02 | placed          | HSA1 | 32.53 |
| 2 | BAI2             | 398.89 | 2.02 | placed          | HSA1 | 31.97 |
| 2 | UMNe513          | 398.89 | 2.02 | placed          | HSA1 | 32.3  |
| 2 | 2STS01           | 398.89 | 2.02 | placed          |      |       |
| 2 | LAPTM5           | 409.83 | 6    | frame           | HSA1 | 30.98 |
| 2 | MATN1            | 409.83 | 6    | frame_identical | HSA1 | 30.96 |
| 2 | CH241-100C12_SP6 | 409.83 | 6    | frame_identical | HSA1 | 30.5  |
| 2 | CH241-100C12_T7  | 409.83 | 6    | frame_identical |      |       |
| 2 | MECR             | 419.56 | 2.26 | placed          | HSA1 | 29.39 |
| 2 | TKY974           | 434.18 | 2.13 | placed          | HSA1 | 27.6  |
| 2 | WASF2            | 438.79 | 5.36 | frame           | HSA1 | 27.60 |
| 2 | GPR3             | 438.79 | 5.36 | frame_identical | HSA1 | 27.59 |
| 2 | CNR2             | 459.38 | 1.95 | placed          | HSA1 | 24.07 |
| 2 | TCEB3            | 468.6  | 0.34 | placed          | HSA1 | 23.94 |
| 2 | FUCA1            | 468.6  | 0.34 | placed          | HSA1 | 24.04 |
| 2 | AHT067           | 472.64 | 0.16 | placed          | HSA1 | 24.1  |
| 2 | CLIC4            | 476.52 | 5.36 | frame           | HSA1 | 24.94 |
| 2 | ASB17            | 476.52 | 5.36 | frame_identical |      |       |
| 2 | AHT073           | 505.03 | 1.78 | placed          |      |       |
| 2 | UM007            | 505.03 | 1.74 | placed          |      |       |
| 2 | ALPL             | 508.54 | 2.1  | frame           | HSA1 | 21.71 |
| 2 | CAPZB            | 548.69 | 0.79 | frame           | HSA1 | 19.54 |
| 2 | NBL1             | 569.83 | 2.42 | placed          | HSA1 | 19.84 |
| 2 | HTR6             | 573.32 | 0.79 | frame           | HSA1 | 19.86 |
| 2 | ZUBR1            | 580.11 | 2.66 | placed          | HSA1 | 19.27 |
| 2 | CH241-102M22_SP6 | 583.39 | 4.3  | frame           | HSA1 | 18.2  |
| 2 | UMNe080          | 586.68 | 0.13 | placed          |      |       |
| 2 | ATP13A2          | 593.27 | 2.64 | placed          | HSA1 | 17.19 |
| 2 | UCDEQ380         | 603.46 | 4.39 | frame           |      |       |
| 2 | FBLIM1           | 614.32 | 4.39 | frame           | HSA1 | 15.96 |
| 2 | TKY474           | 633.83 | 2.02 | frame           | HSA1 | 14.1  |
| 2 | TKY784           | 650.72 | 2.02 | frame           |      |       |
| 2 | DHRS3            | 664.75 | 3.74 | placed          | HSA1 | 12.55 |
| 2 | NPPA             | 673.27 | 5.63 | frame           | HSA1 | 11.83 |
| 2 | CLCN6            | 673.27 | 5.63 | frame_identical | HSA1 | 11.79 |
| 2 | PLOD1            | 673.27 | 5.63 | frame_identical | HSA1 | 11.92 |
| 2 | MAD2L2           | 681.35 | 1.95 | placed          | HSA1 | 11.66 |
| 2 | ENO1             | 702.49 | 6.18 | frame           | HSA1 | 8.84  |
| 2 | COR051           | 710.02 | 2.03 | placed          |      |       |
| 2 | KIF1B            | 730.55 | 0.91 | placed          | HSA1 | 10.19 |
| 2 | VAMP3            | 760.27 | 3.87 | frame           | HSA1 | 7.75  |
| 2 | ACOT7            | 775.85 | 3.87 | frame           | HSA1 | 6.25  |
| 2 | DFFB             | 804.36 | 1.84 | frame           | HSA1 | 3.76  |



|   |          |        |                                   |        |      |       |
|---|----------|--------|-----------------------------------|--------|------|-------|
| 2 | AJAP1    | 819.94 | 1.84                              | frame  | HSA1 | 4.61  |
| 2 | MXRA8    | 873.99 | 4.46                              | frame  | HSA1 | 1.28  |
| 2 | GNB1     | 893.94 | 5.1                               | frame  | HSA1 | 1.71  |
| 2 | TNFRSF18 | 911.99 | 2.29                              | frame  | HSA1 | 1.13  |
| 2 | ISG15    | 925.81 | 2.29                              | frame  | HSA1 | 0.94  |
| 2 | UMNe411  | ---    | [2STS02 -<br>COR041/065]          | binned | HSA1 | 59.9  |
| 2 | TKY965   | ---    | [PPAP2B -<br>OSBPL9]              | binned | HSA1 | 53.4  |
| 2 | CPT2     | ---    | [PPAP2B -<br>OSBPL9]              | binned | HSA1 | 53.43 |
| 2 | UMNe449  | ---    | [ACOT7 - AJAP1]                   | binned |      |       |
| 2 | HCRTR1   | ---    | [CH241-<br>100K16_T7 -<br>WASF2]  | binned | HSA1 | 31.86 |
| 2 | TKY340   | ---    | [TKY784 - ENO1]                   | binned |      |       |
| 2 | AGTRAP   | ---    | [TKY784 - ENO1]                   | binned | HSA1 | 11.72 |
| 2 | PGD      | ---    | [NPPA - VAMP3]                    | binned | HSA1 | 10.38 |
| 2 | NMNAT1   | ---    | [NPPA - VAMP3]                    | binned | HSA1 | 9.93  |
| 2 | EXOSC10  | ---    | [NPPA - VAMP3]                    | binned | HSA1 | 11.05 |
| 2 | HSPG2    | ---    | [CLIC4 - CAPZB]                   | binned | HSA1 | 22.02 |
| 2 | ECE1     | ---    | [CLIC4 - CAPZB]                   | binned | HSA1 | 21.42 |
| 2 | HP1BP3   | ---    | [CLIC4 - CAPZB]                   | binned | HSA1 | 20.94 |
| 2 | EIF4G3   | ---    | [CLIC4 - CAPZB]                   | binned | HSA1 | 21.01 |
| 2 | FAM54B   | ---    | [WASF2 - ALPL]                    | binned | HSA1 | 26.02 |
| 2 | MAN1C1   | ---    | [WASF2 - ALPL]                    | binned | HSA1 | 25.82 |
| 2 | UMNe323  | ---    | [ZMPSTE24 -<br>EIF2C1]            | binned | HSA1 | 38.7  |
| 2 | GNL2     | ---    | [ZMPSTE24 -<br>EIF2C1]            | binned | HSA1 | 37.81 |
| 2 | CSF3R    | ---    | [PABPC4 -<br>CH241-<br>100K16_T7] | binned | HSA1 | 36.70 |
| 2 | STK40    | ---    | [PABPC4 -<br>CH241-<br>100K16_T7] | binned | HSA1 | 36.58 |
| 2 | AHT035   | ---    | [EIF2C1 -<br>LAPTM5]              | binned | HSA1 | 33.8  |
| 2 | LPL      | 0      | 2.97                              | frame  | HSA8 | 19.84 |
| 2 | SFTPC    | 23.74  | 1.94                              | frame  | HSA8 | 22.08 |
| 2 | PDLIM2   | 27.55  | 1.03                              | placed | HSA8 | 22.49 |
| 2 | TKY2565  | 42.75  | 2.05                              | frame  | HSA8 | 21.8  |
| 2 | NKX3-1   | 54.14  | 2.05                              | frame  | HSA8 | 23.59 |
| 2 | KCTD9    | 69.92  | 6.76                              | frame  | HSA8 | 25.34 |
| 2 | COR049   | 106    | 3.6                               | frame  |      |       |
| 2 | STMN4    | 137.53 | 4.45                              | frame  | HSA8 | 27.15 |
| 2 | PNOC     | 148.91 | 2.54                              | frame  | HSA8 | 28.23 |
| 2 | MSRA     | 159.9  | 2.54                              | frame  | HSA8 | 9.95  |
| 2 | TKY381   | 170.89 | 1.82                              | placed | HSA8 | 29.1  |
| 2 | AHT012   | 194.41 | 0.48                              | placed |      |       |
| 2 | TKY1171  | 198.88 | 3.79                              | frame  |      |       |
| 2 | CTSB     | 207.44 | 2.42                              | placed | HSA8 | 11.74 |

|   |                       |        |                       |                 |      |        |
|---|-----------------------|--------|-----------------------|-----------------|------|--------|
| 2 | HMGB2                 | 211.72 | 3.79                  | frame           | HSA4 | 174.49 |
| 2 | HMS16                 | 234.17 | 1.95                  | frame           |      |        |
| 2 | COR108                | 242.37 | 2.6                   | placed          |      |        |
| 2 | CBR4                  | 250.57 | 0.38                  | placed          | HSA4 | 170.15 |
| 2 | KIAA0922              | 258.44 | 1.95                  | frame           | HSA4 | 154.61 |
| 2 | UMNe330               | 262.09 | 1.97                  | placed          | HSA4 | 170    |
| 2 | 2STS03                | 280.46 | 2.48                  | placed          | HSA4 | 164.66 |
| 2 | TKY358                | 287.11 | 2.48                  | placed          |      |        |
| 2 | UM029                 | 293.76 | 1.1                   | placed          |      |        |
| 2 | KLHL2                 | 293.76 | 1.19                  | placed          | HSA4 | 166.35 |
| 2 | COR094                | 311.56 | 1.3                   | placed          |      |        |
| 2 | UMNe242               | 328.78 | 2.48                  | placed          |      |        |
| 2 | A-14                  | 376.52 | 1.99                  | frame           |      |        |
| 2 | ASB13                 | 388.83 | 1.99                  | frame           |      |        |
| 2 | TKY645                | 401.68 | 2.3                   | frame           |      |        |
| 2 | MAP9                  | 415.13 | 2.44                  | placed          | HSA4 | 156.48 |
| 2 | FGA                   | 419.62 | 4.07                  | frame           | HSA4 | 155.72 |
| 2 | FGG                   | 419.62 | 4.07                  | frame_identical | HSA4 | 155.74 |
| 2 | TLR2                  | 424.32 | 2.45                  | placed          | HSA4 | 154.82 |
| 2 | TKY850                | 434.85 | 4.07                  | frame           | HSA4 | 154.8  |
| 2 | TKY511                | 455.92 | 4.19                  | frame           | HSA4 | 154.2  |
| 2 | TKY1054               | 473.97 | 4.48                  | placed          | HSA4 | 152.4  |
| 2 | TKY701                | 477.93 | 2.41                  | placed          | HSA4 | 151    |
| 2 | TKY2717               | 477.93 | 2.41                  | placed          | HSA4 | 151.3  |
| 2 | UMNe226               | 477.93 | 2.41                  | placed          | HSA4 | 151.1  |
| 2 | TKY1907               | 485.81 | 0.43                  | placed          | HSA4 | 150.5  |
| 2 | TMEM34                | 493.68 | 4.07                  | frame           | HSA4 | 148.76 |
| 2 | SLC10A7               | 505.99 | 4.07                  | frame           | HSA4 | 147.58 |
| 2 | UMNe076               | 535.19 | 0.13                  | placed          |      |        |
| 2 | CH241-<br>100G3_T7_MS | 565.66 | 2.6                   | placed          | HSA4 | 147.4  |
| 2 | SMARCA5               | 570.15 | 4.54                  | frame           | HSA4 | 144.65 |
| 2 | TKY944                | 585.88 | 4.15                  | frame           | HSA4 | 143.9  |
| 2 | PCDH18                | 606.89 | 4.15                  | frame           | HSA4 | 138.66 |
| 2 | ZNF330                | 625.71 | 3.43                  | placed          | HSA4 | 142.36 |
| 2 | UMNe236               | 625.71 | 3.38                  | placed          | HSA4 | 139.7  |
| 2 | TKY335                | 625.71 | 2.27                  | placed          | HSA4 | 142.2  |
| 2 | UCP1                  | 629.65 | 2.9                   | frame           | HSA4 | 141.70 |
| 2 | TBC1D9                | 642.5  | 2.9                   | frame           | HSA4 | 141.76 |
| 2 | UMNe129               | ---    | [HMGB2 -<br>KIAA0922] | binned          |      |        |
| 2 | CLU                   | ---    | [STMN4 - MSRA]        | binned          | HSA8 | 27.51  |
| 2 | UMNe405               | ---    | [STMN4 - MSRA]        | binned          | HSA8 | 28.2   |
| 2 | FDFT1                 | ---    | [MSRA - HMS16]        | binned          | HSA8 | 11.70  |
| 2 | TKY605                | ---    | [MSRA -<br>HMGB2]     | binned          |      |        |
| 2 | NARG1                 | ---    | [PCDH18 -<br>TBC1D9]  | binned          | HSA4 | 140.44 |
| 2 | ABCE1                 | ---    | [TMEM34 -<br>SMARCA5] | binned          | HSA4 | 146.24 |
| 2 | FGB                   | ---    | [TKY645 -<br>TKY850]  | binned          | HSA4 | 155.70 |

|   |         |        |                    |                 |      |        |
|---|---------|--------|--------------------|-----------------|------|--------|
| 2 | UMNe205 | ---    | [A-14 - TKY645]    | binned          |      |        |
| 2 | TKY313  | ---    | [A-14 - TKY645]    | binned          |      |        |
| 2 | Tenr    | 0      | 1.57               | frame           | HSA4 | 123.52 |
| 2 | UMNe396 | 12.71  | 0.83               | placed          |      |        |
| 2 | SPATA5  | 31.68  | 1.57               | frame           | HSA4 | 124.06 |
| 2 | UMNe488 | 31.68  | 1.57               | frame_identical |      |        |
| 2 | TKY497  | 31.68  | 1.57               | frame_identical | HSA4 | 124.7  |
| 2 | TNIP3   | 50.66  | 4.14               | frame           | HSA4 | 122.27 |
| 2 | UMNe374 | 62.46  | 0.16               | placed          | HSA4 | 121.7  |
| 2 | UMNe336 | 62.46  | 0.16               | placed          | HSA4 | 121.8  |
| 2 | FABP2   | 68.38  | 4.14               | frame           | HSA4 | 120.46 |
| 2 | TKY1142 | 87.46  | 2.38               | placed          |      |        |
| 2 | AHT065  | 93.02  | 1.87               | frame           |      |        |
| 2 | VHL123  | 93.02  | 1.87               | frame_identical |      |        |
| 2 | UGT8    | 98.23  | 2.46               | placed          | HSA4 | 115.76 |
| 2 | TKY2970 | 98.23  | 2.46               | placed          | HSA4 | 115.9  |
| 2 | TKY1192 | 103.41 | 0.23               | placed          | HSA4 | 111.1  |
| 2 | CFI     | 108.3  | 1.87               | frame           | HSA4 | 110.88 |
| 2 | COR043  | 108.3  | 1.87               | frame_identical |      |        |
| 2 | TKY842  | 118.1  | 2.33               | placed          | HSA4 | 107.9  |
| 2 | COR026  | 149.47 | 2.92               | frame           | HSA4 | 109.5  |
| 2 | COR035  | 155.85 | 1.36               | placed          | HSA4 | 107.9  |
| 2 | TRAM1L1 | ---    | [FABP2 - CFI]      | binned          | HSA4 | 118.22 |
| 2 | TKY903  | ---    | [CFI - q-terminal] | binned          |      |        |

| Horse Chr. | Marker  | Map Position (cR) | Placement LOD | Assignment | Human Chr. | Human Mb (Build 36.1) |
|------------|---------|-------------------|---------------|------------|------------|-----------------------|
| 3          | PHKB    | 0                 | 0.87          | frame      | HSA16      | 46.05                 |
| 3          | VPS35   | 12.93             | 0.87          | frame      | HSA16      | 45.25                 |
| 3          | TKY590  | 25.53             | 3.43          | frame      | HSA16      | 47.7                  |
| 3          | BRD7    | 51.2              | 11.01         | frame      | HSA16      | 48.91                 |
| 3          | AKTIP   | 75.21             | 1.96          | frame      | HSA16      | 52.08                 |
| 3          | AHT118  | 83.87             | 1.96          | frame      |            |                       |
| 3          | MMP2    | 131.16            | 4.45          | frame      | HSA16      | 54.07                 |
| 3          | TKY2482 | 173.93            | 5.25          | frame      | HSA16      | 58.7                  |
| 3          | COR028  | 215.76            | 3.15          | frame      | HSA16      | 57.8                  |
| 3          | GOT2    | 224.26            | 2.39          | frame      | HSA16      | 57.30                 |
| 3          | TKY450  | 232.26            | 1.02          | frame      |            |                       |
| 3          | CNOT1   | 243.16            | 3.93          | frame      | HSA16      | 57.11                 |
| 3          | CIAPIN1 | 261.78            | 4.31          | frame      | HSA16      | 56.02                 |
| 3          | UMNe538 | 277.6             | 1.8           | frame      | HSA16      | 60.3                  |
| 3          | COR033  | 286.38            | 1.8           | frame      |            |                       |
| 3          | TKY1323 | 298.14            | 2.56          | frame      | HSA16      | 63.7                  |
| 3          | TKY3084 | 301.06            | 4.4           | placed     | HSA16      | 64.1                  |
| 3          | TKY1082 | 301.06            | 2.72          | placed     |            |                       |
| 3          | SGCV18  | 304.03            | 4.62          | frame      |            |                       |
| 3          | TKY937  | 316.62            | 6.37          | frame      | HSA16      | 64.6                  |
| 3          | 3STS01  | 325.87            | 5.69          | frame      |            |                       |
| 3          | TKY1150 | 341.73            | 5.69          | frame      |            |                       |

|   |           |        |                          |                 |       |        |
|---|-----------|--------|--------------------------|-----------------|-------|--------|
| 3 | CBFB      | 373.18 | 2.18                     | placed          | HSA16 | 65.62  |
| 3 | PSMB10    | 376.3  | 1.83                     | frame           | HSA16 | 66.53  |
| 3 | NFAT5     | 385.95 | 0.59                     | placed          | HSA16 | 68.16  |
| 3 | PSMD7     | 385.95 | 0.59                     | placed          | HSA16 | 72.89  |
| 3 | HP        | 392.54 | 1.83                     | frame           | HSA16 | 70.65  |
| 3 | AHT022    | 392.54 | 1.83                     | frame_identical |       |        |
| 3 | TKY1085   | 399.17 | 4.62                     | placed          | HSA16 | 69.8   |
| 3 | VAC14     | 416.96 | 2.3                      | placed          | HSA16 | 69.28  |
| 3 | GLG1      | 430.62 | 3.74                     | frame           | HSA16 | 73.04  |
| 3 | FUK       | 439.8  | 3.74                     | frame           | HSA16 | 69.05  |
| 3 | GABARAPL2 | 461.14 | 9.57                     | frame           | HSA16 | 74.16  |
| 3 | KARS      | 461.14 | 9.57                     | frame_identical | HSA16 | 74.22  |
| 3 | CLEC3A    | 486.82 | 5.95                     | frame           | HSA16 | 76.61  |
| 3 | UMNe516   | 500.48 | 5.85                     | frame           |       |        |
| 3 | UMNe557   | 515.02 | 5.64                     | frame           |       |        |
| 3 | C16orf61  | 548.47 | 6.98                     | frame           | HSA16 | 79.57  |
| 3 | MPHOSPH6  | 564.29 | 6.98                     | frame           | HSA16 | 80.74  |
| 3 | UMNe311   | 582.9  | 2.03                     | frame           | HSA16 | 82.9   |
| 3 | AHT090    | 585.75 | 2.18                     | placed          | HSA16 | 82.6   |
| 3 | UCDEQ437  | 594.53 | 2.4                      | placed          |       |        |
| 3 | MBTPS1    | 600.36 | 2.03                     | frame           | HSA16 | 82.64  |
| 3 | COX4I1    | 633.87 | 2.86                     | frame           | HSA16 | 84.39  |
| 3 | UMNe317   | 675.18 | 2.86                     | frame           |       |        |
| 3 | RPL13     | 739.55 | 3.34                     | frame           | HSA16 | 88.15  |
| 3 | LEX057    | 744.95 | 3.44                     | placed          |       |        |
| 3 | MC1R      | 750.57 | 2.57                     | placed          | HSA16 | 88.51  |
| 3 | GAS8      | 753.43 | 3.34                     | frame           | HSA16 | 88.62  |
| 3 | UMNe158   | ---    | [PSMB10 -<br>GLG1]       | binned          | HSA16 | 71.7   |
| 3 | UMNe182   | ---    | [PSMB10 -<br>GLG1]       | binned          | HSA16 | 71.6   |
| 3 | SLC12A4   | ---    | [TKY1150 -<br>HP]        | binned          | HSA16 | 66.54  |
| 3 | AHT036    | ---    | [TKY590 -<br>AKTIP]      | binned          |       |        |
| 3 | HMS61     | ---    | [RPL13 - q-<br>terminal] | binned          |       |        |
| 3 | UMNe068   | 0      | 0                        | frame           | HSA4  | 103.5  |
| 3 | UMNe541   | 0      | 0                        | frame_identical |       |        |
| 3 | TKY651    | 7.94   | 2.18                     | placed          |       |        |
| 3 | UMNe231   | 38.57  | 0                        | frame           | HSA4  | 95.8   |
| 3 | PPP3CA    | 0      | 3.05                     | frame           | HSA4  | 102.16 |
| 3 | MAP2K1IP1 | 12.94  | 2.37                     | frame           | HSA4  | 101.02 |
| 3 | TKY528    | 26.5   | 1.05                     | frame           | HSA4  | 100.8  |
| 3 | ADH1B     | 48.09  | 1.36                     | placed          | HSA4  | 100.45 |

|   |                      |        |      |                 |      |        |
|---|----------------------|--------|------|-----------------|------|--------|
| 3 | ADH1A                | 51.77  | 1.05 | frame           | HSA4 | 100.42 |
| 3 | ABCG2                | 0      | 0.29 | placed          | HSA4 | 89.23  |
| 3 | SPARCL1              | 3.64   | 0.81 | frame           | HSA4 | 88.61  |
| 3 | HSD17B11             | 15.91  | 0.81 | frame           | HSA4 | 88.48  |
| 3 | SEC31A               | 44.45  | 2.81 | frame           | HSA4 | 83.96  |
| 3 | HNRPDL               | 52.97  | 0.9  | placed          | HSA4 | 83.56  |
| 3 | UMNe527              | 70.07  | 2.81 | frame           | HSA4 | 81.5   |
| 3 | TKY990               | 94.87  | 2.27 | frame           | HSA4 | 81.4   |
| 3 | TKY353               | 115.05 | 0.61 | placed          |      |        |
| 3 | CCNI                 | 123.37 | 2.27 | frame           | HSA4 | 78.19  |
| 3 | CXCL9                | 127.28 | 1.87 | placed          | HSA4 | 77.14  |
| 3 | THAP6                | 154.26 | 0.82 | placed          | HSA4 | 76.66  |
| 3 | ALB                  | 164.31 | 1.52 | placed          | HSA4 | 74.49  |
| 3 | CXCL6                | 167.63 | 4.58 | frame           | HSA4 | 74.92  |
| 3 | IL8                  | 167.63 | 4.58 | frame_identical | HSA4 | 74.83  |
| 3 | TKY1129              | 170.85 | 1.54 | placed          |      |        |
| 3 | NVHEQ102             | 207.59 | 3.68 | frame           |      |        |
| 3 | YTHDC1               | 251.89 | 1.16 | frame           | HSA4 | 68.86  |
| 3 | GNRHR                | 266.44 | 1.16 | frame           | HSA4 | 68.29  |
| 3 | CSN3                 | 278.83 | 3.09 | frame           | HSA4 | 71.14  |
| 3 | SULT1E1              | 285.13 | 1.16 | placed          | HSA4 | 70.74  |
| 3 | TKY447               | 301.53 | 2.53 | frame           | HSA4 | 64.9   |
| 3 | TKY874               | 314.19 | 2.53 | frame           | HSA4 | 63.1   |
| 3 | TKY1154              | 323.91 | 3.72 | frame           | HSA4 | 62.8   |
| 3 | TKY1146              | 357.09 | 3.51 | frame           | HSA4 | 59.7   |
| 3 | TKY840               | 361    | 1.8  | placed          | HSA4 | 60.5   |
| 3 | TKY569               | 389.36 | 1.84 | frame           |      |        |
| 3 | UMNe576              | 411.79 | 1.84 | frame           |      |        |
| 3 | UMNe082              | 430.17 | 0.13 | placed          |      |        |
| 3 | IGFBP7               | 433.4  | 2.05 | frame           | HSA4 | 57.59  |
| 3 | 3CA001               | 443.69 | 2.05 | frame           |      |        |
| 3 | TKY905               | 461.47 | 4.39 | frame           |      |        |
| 3 | TKY1918              | 478.26 | 6.19 | frame           | HSA4 | 56.3   |
| 3 | KDR                  | 494.6  | 7.78 | frame           | HSA4 | 55.64  |
| 3 | KIT                  | 504.06 | 4.57 | placed          | HSA4 | 55.22  |
| 3 | PDGFRA               | 510.35 | 5.77 | frame           | HSA4 | 54.79  |
| 3 | ASB23                | 513.58 | 2.22 | placed          | HSA4 | 53.5   |
| 3 | OCIAD1               | 530.82 | 1.76 | frame           | HSA4 | 48.53  |
| 3 | HTG02                | 540.54 | 1.76 | frame           |      |        |
| 3 | CH241-<br>100F24_T7  | 561.3  | 3.08 | frame           |      |        |
| 3 | VHL063               | 561.3  | 3.08 | frame_identical |      |        |
| 3 | CH241-<br>100F24_SP6 | 561.3  | 3.08 | frame_identical | HSA4 | 42.5   |
| 3 | LIAS                 | 581.47 | 2.3  | frame           | HSA4 | 39.14  |
| 3 | FAM114A1             | 590.93 | 2.63 | placed          | HSA4 | 38.55  |
| 3 | RFC1                 | 590.93 | 2.63 | placed          | HSA4 | 38.97  |
| 3 | RHOH                 | 594.16 | 2.3  | frame           | HSA4 | 39.87  |
| 3 | UCHL1                | 601    | 2.45 | placed          | HSA4 | 40.95  |
| 3 | TKY2924              | 601    | 1.96 | placed          | HSA4 | 41.7   |
| 3 | TKY837               | 604.54 | 3.77 | frame           |      |        |

|   |          |        |                        |        |      |       |
|---|----------|--------|------------------------|--------|------|-------|
| 3 | UMNe600  | 625.09 | 0.11                   | placed |      |       |
| 3 | PCDH7    | 629.17 | 5.1                    | frame  | HSA4 | 30.33 |
| 3 | AHT097   | 662.36 | 1.76                   | frame  |      |       |
| 3 | ANAPC4   | 674.63 | 1.76                   | frame  | HSA4 | 24.99 |
| 3 | DHX15    | 699.35 | 3.98                   | frame  | HSA4 | 24.14 |
| 3 | PPARGC1A | 714.02 | 3.98                   | frame  | HSA4 | 23.40 |
| 3 | TKY427   | 732.4  | 4.08                   | frame  |      |       |
| 3 | TKY1037  | 767.77 | 6.34                   | frame  | HSA4 | 18.2  |
| 3 | TKY910   | 811.78 | 0.97                   | placed | HSA4 | 15.1  |
| 3 | C1QTNF7  | 821.77 | 0.46                   | placed | HSA4 | 14.95 |
| 3 | FBXL5    | 824.91 | 4.94                   | frame  | HSA4 | 15.22 |
| 3 | UMNe251  | 835.2  | 4.94                   | frame  |      |       |
| 3 | TKY780   | 861.16 | 1                      | frame  |      |       |
| 3 | SLC2A9   | 873.42 | 1                      | frame  | HSA4 | 9.44  |
| 3 | LYAR     | 876.84 | 2.57                   | placed | HSA4 | 4.32  |
| 3 | MRFAP1   | 886.83 | 8.14                   | frame  | HSA4 | 6.69  |
| 3 | CNO      | 889.97 | 2.32                   | placed | HSA4 | 6.77  |
| 3 | GRPEL1   | 893.12 | 4.65                   | placed | HSA4 | 7.11  |
| 3 | TKY1174  | 905.77 | 7.09                   | frame  |      |       |
| 3 | ADD1     | 929.39 | 2.27                   | placed | HSA4 | 2.82  |
| 3 | DOK7     | 932.61 | 3.5                    | frame  | HSA4 | 3.43  |
| 3 | FGFR3    | 942.6  | 2.84                   | frame  | HSA4 | 1.77  |
| 3 | TKY434   | 952.07 | 2.84                   | frame  | HSA4 | 0.6   |
| 3 | RNF4     | ---    | [DOK7 -<br>TKY434]     | binned | HSA4 | 2.44  |
| 3 | UMNe529  | ---    | [DOK7 -<br>TKY434]     | binned |      |       |
| 3 | WDR1     | ---    | [TKY780 -<br>MRFAP1]   | binned | HSA4 | 9.69  |
| 3 | UMNe113  | ---    | [TKY780 -<br>MRFAP1]   | binned |      |       |
| 3 | UMNe439  | ---    | [TKY1037 -<br>UMNe251] | binned |      |       |
| 3 | UMNe175  | ---    | [SLC2A9 -<br>TKY1174]  | binned |      |       |
| 3 | COR005   | ---    | [AHT097 -<br>DHX15]    | binned |      |       |
| 3 | UMNe178  | ---    | [LIAS -<br>TKY837]     | binned |      |       |
| 3 | LEX007   | ---    | [LIAS -<br>TKY837]     | binned | HSA4 | 40.3  |

| Horse Chr. | Marker   | Map Position (cR) | Placement LOD | Assignment | Human Chr. | Human Mb (Build 36.1) |
|------------|----------|-------------------|---------------|------------|------------|-----------------------|
| 4          | NVHEQ029 | 0                 | 1.55          | frame      |            |                       |
| 4          | PSMC2    | 3.03              | 1.5           | placed     | HSA7       | 102.78                |
| 4          | NAPE-PLD | 3.03              | 2.59          | placed     | HSA7       | 102.53                |
| 4          | AHT043   | 6.19              | 0.29          | placed     | HSA7       | 77.2                  |
| 4          | UMNe110  | 6.19              | 0.29          | placed     | HSA7       | 77                    |
| 4          | UMNe192  | 6.19              | 0.29          | placed     | HSA7       | 77                    |
| 4          | MAGI2    | 9.37              | 1.55          | frame      | HSA7       | 77.48                 |

|   |                     |        |                     |                 |      |        |
|---|---------------------|--------|---------------------|-----------------|------|--------|
| 4 | PTPN12              | 9.37   | 1.55                | frame_identical | HSA7 | 77.00  |
| 4 | SEMA3C              | 32.31  | 2.05                | frame           | HSA7 | 80.21  |
| 4 | TKY810              | 44.63  | 2.05                | frame           |      |        |
| 4 | SRPK2               | 68.88  | 1.69                | placed          | HSA7 | 104.54 |
| 4 | AHT084              | 111.73 | 3.74                | frame           |      |        |
| 4 | TKY797              | 142.35 | 3.74                | frame           | HSA7 | 105.2  |
| 4 | HMS56               | 159.32 | 2.13                | placed          |      |        |
| 4 | UMNe587             | 159.32 | 2.13                | placed          | HSA7 | 106    |
| 4 | HBP1                | 162.01 | 5.98                | frame           | HSA7 | 106.60 |
| 4 | LAMB1               | 180.22 | 2.6                 | frame           | HSA7 | 107.35 |
| 4 | DLD                 | 191.97 | 2.6                 | frame           | HSA7 | 107.32 |
| 4 | TKY223              | 200.41 | 4.98                | frame           |      |        |
| 4 | TRG@                | 208.69 | 2.6                 | frame           | HSA7 | 38.25  |
| 4 | VPS41               | 216.83 | 2.6                 | frame           | HSA7 | 38.73  |
| 4 | C7orf10             | 234.31 | 4.8                 | frame           | HSA7 | 40.14  |
| 4 | CDC2L5              | 242.74 | 0.37                | placed          | HSA7 | 39.96  |
| 4 | CH241-<br>100K23_T7 | 248.23 | 4.8                 | frame           | HSA7 | 40.7   |
| 4 | INHBA               | 256.67 | 6.87                | frame           | HSA7 | 41.70  |
| 4 | UMNe224             | 267.77 | 2.84                | frame           | HSA7 | 42     |
| 4 | UMNe561             | 273    | 2.4                 | placed          |      |        |
| 4 | GLI3                | 289.84 | 2.84                | frame           | HSA7 | 41.97  |
| 4 | TKY958              | 326.93 | 3.92                | frame           |      |        |
| 4 | DDX56               | 383.05 | 1.61                | placed          | HSA7 | 44.57  |
| 4 | POLM                | 396.81 | 2.11                | frame           | HSA7 | 44.08  |
| 4 | GCK                 | 405    | 2.11                | frame           | HSA7 | 44.15  |
| 4 | PGAM2               | 413.34 | 0.95                | frame           | HSA7 | 44.07  |
| 4 | MYO1G               | 421.77 | 4.58                | frame           | HSA7 | 44.97  |
| 4 | TKY942              | 427.5  | 5.17                | placed          |      |        |
| 4 | IGFBP1              | 435.96 | 6.03                | frame           | HSA7 | 45.89  |
| 4 | UMNe404             | 441.23 | 3.48                | placed          |      |        |
| 4 | TKY922              | 452.27 | 6.03                | frame           |      |        |
| 4 | UMNe063             | 473.03 | 3.66                | frame           |      |        |
| 4 | COBL                | 484.03 | 3.66                | frame           | HSA7 | 51.05  |
| 4 | ASB03               | 525.7  | 3.31                | frame           | HSA7 | 53.7   |
| 4 | CH241-<br>112H8_SP6 | 538.39 | 0.29                | placed          | HSA7 | 55     |
| 4 | EGFR                | 545.65 | 3.31                | frame           | HSA7 | 55.05  |
| 4 | TRGV10              | ---    | [TKY223 -<br>VPS41] | binned          | HSA7 | 38.31  |
| 4 | CACNA2D1            | 0      | 2.85                | frame           | HSA7 | 81.42  |
| 4 | PCLO                | 24.51  | 2.85                | frame           | HSA7 | 82.23  |
| 4 | TKY772              | 68.33  | 1.35                | placed          | HSA7 | 83.4   |
| 4 | TKY337              | 107.71 | 5.31                | frame           |      |        |
| 4 | HTG01               | 140.53 | 2.37                | frame           |      |        |
| 4 | SRI                 | 155.02 | 2.37                | frame           | HSA7 | 87.67  |
| 4 | TKY935              | 157.76 | 2.19                | placed          | HSA7 | 86.2   |
| 4 | C7orf23             | 168.98 | 2.73                | frame           | HSA7 | 86.66  |
| 4 | GRM3                | 187.57 | 2.73                | frame           | HSA7 | 86.11  |
| 4 | COR057              | 193.93 | 1.1                 | placed          |      |        |
| 4 | STEAP1,2            | 209.46 | 0.71                | placed          | HSA7 | 89.6   |

|   |                 |        |      |                 |      |       |
|---|-----------------|--------|------|-----------------|------|-------|
| 4 | AHT006          | 209.46 | 0.71 | placed          |      |       |
| 4 | CYP51A1         | 218.27 | 3.98 | frame           | HSA7 | 91.58 |
| 4 | TKY1063         | 218.27 | 3.98 | frame_identical | HSA7 | 90.3  |
| 4 | AKAP9           | 224.16 | 2.56 | placed          | HSA7 | 91.41 |
| 4 | CCDC132         | 227.03 | 3.98 | frame           | HSA7 | 92.70 |
| 4 | ASB29           | 233.01 | 2.36 | placed          | HSA7 | 92.2  |
| 4 | SLC25A13        | 246    | 1.45 | frame           | HSA7 | 95.59 |
| 4 | UMNe249         | 252.32 | 0.21 | placed          | HSA7 | 96.2  |
| 4 | COL1A2          | 258.51 | 1.24 | placed          | HSA7 | 93.86 |
| 4 | PON1            | 261.44 | 1.45 | frame           | HSA7 | 94.76 |
| 4 | TKY210          | 261.44 | 1.45 | frame_identical |      |       |
| 4 | NDUFA4          | 296.41 | 8.24 | frame           | HSA7 | 10.94 |
| 4 | TKY2982         | 332.22 | 5.11 | frame           | HSA7 | 11.5  |
| 4 | PHF14           | 339.07 | 1.58 | placed          | HSA7 | 10.98 |
| 4 | CH241-100O5_SP6 | 342.53 | 2.28 | placed          | HSA7 | 11.1  |
| 4 | NXPH1           | 349.36 | 1.39 | frame           | HSA7 | 8.44  |
| 4 | LEX061          | 349.36 | 1.39 | frame_identical | HSA7 | 8.4   |
| 4 | TKY953          | 370.02 | 1.02 | placed          | HSA7 | 7.7   |
| 4 | FLJ20323        | 378.16 | 1.39 | frame           | HSA7 | 7.57  |
| 4 | ARL4A           | 400.27 | 4.13 | frame           | HSA7 | 12.69 |
| 4 | SCIN            | 406.9  | 1.89 | placed          | HSA7 | 12.60 |
| 4 | TKY586          | 413.54 | 2.78 | placed          |      |       |
| 4 | TKY1079         | 416.76 | 6.37 | frame           |      |       |
| 4 | MEOX2           | 427.36 | 6.81 | frame           | HSA7 | 15.62 |
| 4 | TKY639          | 427.36 | 6.81 | frame_identical |      |       |
| 4 | SOSTDC1         | 434.96 | 1.4  | placed          | HSA7 | 16.47 |
| 4 | ANKMY2          | 438.75 | 6.79 | frame           | HSA7 | 16.61 |
| 4 | LEX050          | 438.75 | 6.79 | frame_identical | HSA7 | 16.7  |
| 4 | SNX13           | 453.58 | 5.31 | frame           | HSA7 | 17.80 |
| 4 | AHT013          | 460.5  | 2.76 | placed          |      |       |
| 4 | UMNe199         | 467.34 | 2.83 | frame           |      |       |
| 4 | TKY2805         | 485.14 | 0.52 | frame           | HSA7 | 20.9  |
| 4 | ITGB8           | 495.48 | 0.52 | frame           | HSA7 | 20.34 |
| 4 | TKY1089         | 514.49 | 1.84 | frame           | HSA7 | 22.4  |
| 4 | IL6             | 540.43 | 0.99 | placed          | HSA7 | 22.73 |
| 4 | NPY             | 551.86 | 1.84 | frame           | HSA7 | 24.29 |
| 4 | CBX3            | 555.17 | 2.28 | placed          | HSA7 | 26.21 |
| 4 | UMNe551         | 558.5  | 2.5  | placed          | HSA7 | 26.6  |
| 4 | TKY830          | 565.18 | 0.3  | placed          | HSA7 | 27.6  |
| 4 | HIBADH          | 568.34 | 5.28 | frame           | HSA7 | 27.53 |
| 4 | VHL088          | 602.06 | 2.18 | frame           |      |       |
| 4 | ASB22           | 619.4  | 2.22 | frame           |      |       |
| 4 | TKY1059         | 625.93 | 0.64 | placed          |      |       |
| 4 | CREB5           | 629.26 | 2.39 | frame           | HSA7 | 28.31 |
| 4 | LEX033          | 629.26 | 2.39 | frame_identical |      |       |
| 4 | CPVL            | 632.67 | 2.76 | placed          | HSA7 | 29.00 |
| 4 | NOD1            | 636.19 | 0.17 | placed          | HSA7 | 30.43 |
| 4 | GARS            | 636.19 | 0.17 | placed          | HSA7 | 30.60 |
| 4 | FLJ22374        | 636.19 | 0.16 | placed          | HSA7 | 30.78 |
| 4 | PLEKHA8         | 639.71 | 2.73 | frame           | HSA7 | 30.03 |



|   |          |         |      |                 |      |        |
|---|----------|---------|------|-----------------|------|--------|
| 4 | NEUROD6  | 655.45  | 4.7  | frame           | HSA7 | 31.34  |
| 4 | BMPER    | 671.83  | 6.38 | frame           | HSA7 | 33.91  |
| 4 | BBS9     | 679.25  | 2.72 | placed          | HSA7 | 33.14  |
| 4 | UMNe104  | 679.25  | 2.59 | placed          |      |        |
| 4 | HTG07    | 679.25  | 2.59 | placed          |      |        |
| 4 | TKY1717  | 682.56  | 2.48 | placed          | HSA7 | 33.7   |
| 4 | TBX20    | 689.2   | 4.67 | frame           | HSA7 | 35.24  |
| 4 | TKY552   | 689.2   | 4.67 | frame_identical | HSA7 | 35.2   |
| 4 | TKY300   | 689.2   | 4.67 | frame_identical |      |        |
| 4 | KIAA0895 | 692.51  | 2.61 | placed          | HSA7 | 36.33  |
| 4 | ANLN     | 699.56  | 4.51 | frame           | HSA7 | 36.40  |
| 4 | DNAJB9   | 711.34  | 4.51 | frame           | HSA7 | 108.00 |
| 4 | UMNe101  | 740.25  | 4.7  | frame           | HSA7 | 108.9  |
| 4 | TKY354   | 773.75  | 0.42 | placed          | HSA7 | 110.4  |
| 4 | HTG09    | 798.04  | 2.22 | frame           |      |        |
| 4 | PPP1R3A  | 812.21  | 2.22 | frame           | HSA7 | 113.30 |
| 4 | TFEC     | 815.87  | 2.59 | placed          | HSA7 | 115.36 |
| 4 | HMS19    | 827.8   | 1.41 | placed          |      |        |
| 4 | TES      | 831.73  | 4.46 | frame           | HSA7 | 115.64 |
| 4 | TKY375   | 831.73  | 4.46 | frame_identical | HSA7 | 114.5  |
| 4 | MDFIC    | 831.73  | 4.46 | frame_identical | HSA7 | 114.35 |
| 4 | FOXP2    | 835.64  | 0.12 | placed          | HSA7 | 113.84 |
| 4 | CAPZA2   | 847.9   | 0.43 | placed          | HSA7 | 116.29 |
| 4 | CFTR     | 851.85  | 0.17 | placed          | HSA7 | 116.91 |
| 4 | ANKRD7   | 855.67  | 4.06 | frame           | HSA7 | 117.65 |
| 4 | LSM8     | 863.5   | 0.31 | placed          | HSA7 | 117.61 |
| 4 | ING3     | 898.08  | 4.25 | frame           | HSA7 | 120.38 |
| 4 | TKY1044  | 898.08  | 4.25 | frame_identical | HSA7 | 120.1  |
| 4 | KCND2    | 898.08  | 4.25 | frame_identical | HSA7 | 119.70 |
| 4 | TKY661   | 909.04  | 4.86 | placed          |      |        |
| 4 | CADPS2   | 916.33  | 5.09 | frame           | HSA7 | 121.75 |
| 4 | TKY833   | 916.33  | 5.09 | frame_identical | HSA7 | 121.4  |
| 4 | WASL     | 927     | 5.09 | frame           | HSA7 | 123.11 |
| 4 | TKY977   | 941.74  | 3.6  | placed          | HSA7 | 124.8  |
| 4 | GPR37    | 966.59  | 1.01 | placed          | HSA7 | 124.17 |
| 4 | TKY3083  | 1011.04 | 2.44 | placed          | HSA7 | 126.2  |
| 4 | ARF5     | 1022.54 | 1.24 | frame           | HSA7 | 127.02 |
| 4 | LEP      | 1033.5  | 2.37 | frame           | HSA7 | 127.67 |
| 4 | ATP6V1F  | 1043.49 | 2.37 | frame           | HSA7 | 128.29 |
| 4 | PARP12   | 1056.55 | 0.39 | placed          | HSA7 | 139.37 |
| 4 | HMS09    | 1069.62 | 2.5  | placed          | HSA7 | 128.9  |
| 4 | ZC3HC1   | 1072.86 | 2.89 | placed          | HSA7 | 129.45 |
| 4 | MEST     | 1079.73 | 2.39 | frame           | HSA7 | 129.91 |
| 4 | AHT108   | 1102.76 | 4.4  | frame           | HSA7 | 130.6  |
| 4 | CHCHD3   | 1128.67 | 2.47 | frame           | HSA7 | 132.12 |
| 4 | TKY1099  | 1147.06 | 1.5  | placed          | HSA7 | 131.9  |
| 4 | COR047   | 1154.35 | 2.47 | frame           |      |        |
| 4 | BPGM     | 1175.74 | 2.23 | frame           | HSA7 | 133.98 |
| 4 | CALD1    | 1178.9  | 0.39 | placed          | HSA7 | 134.11 |
| 4 | MTPN     | 1185.22 | 2.23 | frame           | HSA7 | 135.26 |

|   |         |         |                        |                 |      |        |
|---|---------|---------|------------------------|-----------------|------|--------|
| 4 | UMNe256 | 1198.57 | 2.22                   | frame           | HSA7 | 136.4  |
| 4 | FLNC    | 1220.81 | 5.97                   | frame           | HSA7 | 128.26 |
| 4 | CLCN1   | 1236.17 | 1.11                   | frame           | HSA7 | 142.72 |
| 4 | TKY363  | 1244.05 | 2.66                   | placed          | HSA7 | 142.6  |
| 4 | TKY1030 | 1248.12 | 4.54                   | frame           | HSA7 | 141.5  |
| 4 | AHT061  | 1261.48 | 3.91                   | frame           |      |        |
| 4 | UMNe174 | 1274.25 | 2.67                   | frame           |      |        |
| 4 | UMNe172 | 1297.42 | 0.62                   | frame           | HSA7 | 144.3  |
| 4 | TKY2101 | 1320.47 | 0.62                   | frame           | HSA7 | 144    |
| 4 | UMNe377 | 1336.21 | 3.63                   | frame           | HSA7 | 147.7  |
| 4 | TKY430  | 1356.74 | 2.02                   | frame           |      |        |
| 4 | GIMAP4  | 1372.48 | 2.02                   | frame           | HSA7 | 149.90 |
| 4 | NOS3    | 1383.83 | 6.04                   | frame           | HSA7 | 150.32 |
| 4 | PRKAG2  | 1383.83 | 6.04                   | frame_identical | HSA7 | 150.88 |
| 4 | SGCV23  | 1387.74 | 0.3                    | placed          |      |        |
| 4 | ABCF2   | 1391.8  | 0.5                    | placed          | HSA7 | 150.54 |
| 4 | MLL3    | 1427    | 0.75                   | frame           | HSA7 | 151.46 |
| 4 | DNAJB6  | 1450.68 | 4                      | frame           | HSA7 | 156.82 |
| 4 | AHT042  | 1454.94 | 1.64                   | placed          |      |        |
| 4 | TKY820  | 1459.27 | 1.47                   | frame           | HSA7 | 155.7  |
| 4 | EN2     | 1472.73 | 1.45                   | frame           | HSA7 | 154.94 |
| 4 | AHT009  | 1481.28 | 1.82                   | placed          |      |        |
| 4 | MPP6    | ---     | [TKY1089 -<br>HIBADH]  | binned          | HSA7 | 24.58  |
| 4 | IGF2BP3 | ---     | [ITGB8 -<br>NPY]       | binned          | HSA7 | 23.32  |
| 4 | UMNe544 | ---     | [TKY1089 -<br>HIBADH]  | binned          | HSA7 | 25.7   |
| 4 | SKAP2   | ---     | [TKY1089 -<br>HIBADH]  | binned          | HSA7 | 26.67  |
| 4 | AHR     | ---     | [ANKMY2 -<br>UMNe199]  | binned          | HSA7 | 17.30  |
| 4 | COR089  | ---     | [VHL088 -<br>CREB5]    | binned          | HSA7 | 28.8   |
| 4 | UMNe054 | ---     | [CREB5 -<br>NEUROD6]   | binned          | HSA7 | 29.6   |
| 4 | KBTBD2  | ---     | [NEUROD6 -<br>TBX20]   | binned          | HSA7 | 32.87  |
| 4 | UMNe112 | ---     | [HIBADH -<br>ASB22]    | binned          | HSA7 | 32.2   |
| 4 | HERPUD2 | ---     | [BMPER -<br>ANLN]      | binned          | HSA7 | 35.64  |
| 4 | AOAH    | ---     | [TBX20 -<br>UMNe101]   | binned          | HSA7 | 36.52  |
| 4 | TKY720  | ---     | [PPP1R3A -<br>ANKRD7]  | binned          | HSA7 | 113.3  |
| 4 | VHL057  | ---     | [COR047 -<br>MTPN]     | binned          |      |        |
| 4 | TKY1110 | ---     | [FLNC -<br>TKY1030]    | binned          |      |        |
| 4 | HTG22   | ---     | [UMNe174 -<br>UMNe377] | binned          |      |        |
| 4 | TKY818  | ---     | [ATP6V1F -             | binned          |      |        |

|   |         |     |                              |        |      |        |
|---|---------|-----|------------------------------|--------|------|--------|
| 4 | LMBR1   | --- | AHT108]<br>[DNAJB6 -<br>EN2] | binned | HSA7 | 156.17 |
| 4 | UMNe138 | --- | [NXPH1 -<br>ARL4A]           | binned | HSA7 | 7.6    |
| 4 | PON2    | --- | [SLC25A13 -<br>NDUFA4]       | binned | HSA7 | 94.87  |

| <b>Horse<br/>Chr.</b> | <b>Marker</b>       | <b>Map<br/>Position<br/>(cR)</b> | <b>Placement<br/>LOD</b> | <b>Assignment</b> | <b>Human<br/>Chr.</b> | <b>Human<br/>Mb (Build<br/>36.1)</b> |
|-----------------------|---------------------|----------------------------------|--------------------------|-------------------|-----------------------|--------------------------------------|
| 5                     | PLEKHA6             | 0                                | 3.59                     | frame             | HSA1                  | 202.45                               |
| 5                     | TKY041              | 25.89                            | 1.94                     | placed            |                       |                                      |
| 5                     | NUCKS1              | 32.99                            | 3.59                     | frame             | HSA1                  | 203.95                               |
| 5                     | MAPKAPK2            | 55.93                            | 5.14                     | frame             | HSA1                  | 204.92                               |
| 5                     | IL10                | 67.8                             | 2.16                     | placed            | HSA1                  | 205.01                               |
| 5                     | CH241-<br>100A3_SP6 | 71.92                            | 5.14                     | frame             | HSA1                  | 205.2                                |
| 5                     | C4BPB               | 71.92                            | 5.14                     | frame_identical   | HSA1                  | 205.33                               |
| 5                     | FAIM3               | 71.92                            | 5.14                     | frame_identical   | HSA1                  | 205.14                               |
| 5                     | C4BPA               | 71.92                            | 5.14                     | frame_identical   | HSA1                  | 205.34                               |
| 5                     | ATP1B1              | 106.53                           | 3.51                     | frame             | HSA1                  | 167.34                               |
| 5                     | F5                  | 121.25                           | 3.51                     | frame             | HSA1                  | 167.75                               |
| 5                     | TKY508              | 121.25                           | 3.51                     | frame_identical   | HSA1                  | 166.5                                |
| 5                     | TKY1909             | 121.25                           | 3.51                     | frame_identical   | HSA1                  | 167.5                                |
| 5                     | SERPINC1            | 147.13                           | 3.84                     | frame             | HSA1                  | 172.14                               |
| 5                     | LEX004              | 147.13                           | 3.84                     | frame_identical   |                       |                                      |
| 5                     | FASLG               | 147.13                           | 3.84                     | frame_identical   | HSA1                  | 170.89                               |
| 5                     | UMNe220             | 147.13                           | 3.84                     | frame_identical   |                       |                                      |
| 5                     | PIGC                | 155.73                           | 1.87                     | placed            | HSA1                  | 170.68                               |
| 5                     | CACYBP              | 168.64                           | 3.84                     | frame             | HSA1                  | 173.24                               |
| 5                     | TKY1175             | 181.54                           | 0.15                     | placed            | HSA1                  | 171.3                                |
| 5                     | AHT024              | 206.56                           | 4.29                     | frame             | HSA1                  | 173.7                                |
| 5                     | UMNe230             | 206.56                           | 4.29                     | frame_identical   | HSA1                  | 173.3                                |
| 5                     | UMNe454             | 206.56                           | 4.29                     | frame_identical   | HSA1                  | 173.4                                |
| 5                     | TKY1108             | 206.56                           | 4.29                     | frame_identical   | HSA1                  | 173.4                                |
| 5                     | TKY1777             | 221.56                           | 2.23                     | frame             | HSA1                  | 174.9                                |
| 5                     | TOR1AIP2            | 235.77                           | 2.23                     | frame             | HSA1                  | 178.08                               |
| 5                     | SOAT1               | 240.27                           | 0.2                      | placed            | HSA1                  | 177.53                               |
| 5                     | UMNe412             | 259.23                           | 4.52                     | placed            | HSA1                  | 177.8                                |
| 5                     | CH241-<br>101I11_T7 | 267.46                           | 1.95                     | frame             | HSA1                  | 180.4                                |
| 5                     | RGS16               | 271.42                           | 0.12                     | placed            | HSA1                  | 180.83                               |
| 5                     | 5CA001              | 275.53                           | 2.63                     | placed            | HSA1                  | 179.9                                |
| 5                     | NCF2                | 279.68                           | 2.26                     | placed            | HSA1                  | 181.79                               |
| 5                     | LAMC1               | 279.68                           | 2.27                     | placed            | HSA1                  | 181.26                               |
| 5                     | RNF2                | 287.91                           | 0.12                     | placed            | HSA1                  | 183.28                               |
| 5                     | IVNS1ABP            | 292.03                           | 1.95                     | frame             | HSA1                  | 183.53                               |
| 5                     | HMCN1               | 300.27                           | 2.42                     | placed            | HSA1                  | 183.97                               |
| 5                     | PTGS2               | 312.63                           | 2.25                     | placed            | HSA1                  | 184.91                               |
| 5                     | PDC                 | 320.54                           | 3.82                     | frame             | HSA1                  | 184.68                               |

|   |                |        |                             |                 |      |        |
|---|----------------|--------|-----------------------------|-----------------|------|--------|
| 5 | PRG4           | 320.54 | 3.82                        | frame_identical | HSA1 | 184.53 |
| 5 | TPR            | 320.54 | 3.82                        | frame_identical | HSA1 | 184.55 |
| 5 | PLA2G4A        | 324.21 | 2.36                        | placed          | HSA1 | 185.06 |
| 5 | AHT068         | 331.31 | 2.59                        | placed          | HSA1 | 210.4  |
| 5 | SNFT           | 334.74 | 2.26                        | frame           | HSA1 | 210.93 |
| 5 | FLVCR          | 346.17 | 2.26                        | frame           | HSA1 | 211.10 |
| 5 | AHT066         | 358.04 | 2.3                         | frame           | HSA1 | 206    |
| 5 | TKY464         | 358.04 | 2.3                         | frame_identical | HSA1 | 208    |
| 5 | NVHEQ122       | 365.95 | 0.28                        | placed          |      |        |
| 5 | SYT14          | 377.82 | 0.13                        | placed          | HSA1 | 208.18 |
| 5 | TRAF3IP3       | 381.49 | 0.26                        | placed          | HSA1 | 208.00 |
| 5 | TKY2544        | 381.49 | 0.26                        | placed          | HSA1 | 206.3  |
| 5 | VHL66          | 389.39 | 1.27                        | placed          |      |        |
| 5 | TKY887         | 412.09 | 2.41                        | frame           | HSA1 | 204.4  |
| 5 | TMCO1          | 425.58 | 4.25                        | frame           | HSA1 | 163.96 |
| 5 | TKY1163        | 442.8  | 2.1                         | frame           | HSA1 | 162.2  |
| 5 | RGS5           | 466.51 | 1.95                        | frame           | HSA1 | 161.38 |
| 5 | APOA2          | 487.98 | 2.01                        | placed          | HSA1 | 159.46 |
| 5 | DEDD           | 497.48 | 1.95                        | frame           | HSA1 | 159.36 |
| 5 | NDUFS2         | ---    | [RGS5 - q-terminal]         | binned          | HSA1 | 159.44 |
| 5 | FMOD           | ---    | [p-terminal - NUCKS1]       | binned          | HSA1 | 201.58 |
| 5 | UAP1           | ---    | [TKY1163 - DEDD]            | binned          | HSA1 | 160.80 |
| 5 | TKY731         | ---    | [TKY1777 - CH241-101I11_T7] | binned          | HSA1 | 176.4  |
| 5 | ATF3           | ---    | [FLVCR - TKY887]            | binned          | HSA1 | 210.81 |
| 5 | TKY271         | ---    | [SNFT - AHT066]             | binned          |      |        |
| 5 | UMNe108/163    | ---    | [PDC - FLVCR]               | binned          |      |        |
| 5 | TKY456         | ---    | [FLVCR - TKY887]            | binned          | HSA1 | 205    |
| 5 | INTS7          | ---    | [SNFT - AHT066]             | binned          | HSA1 | 210.18 |
| 5 | PPP2R5A        | ---    | [PDC - FLVCR]               | binned          | HSA1 | 210.53 |
| 5 | CH241-101P7_T7 | ---    | [IVNS1ABP - SNFT]           | binned          | HSA1 | 213.1  |
| 5 | ATP1A2         | 0      | 0.57                        | frame           | HSA1 | 158.35 |
| 5 | COPA           | 15.41  | 0.57                        | frame           | HSA1 | 158.53 |
| 5 | CASQ1          | 31.43  | 3.09                        | frame           | HSA1 | 158.43 |
| 5 | WDR42A         | 35.43  | 1.97                        | placed          | HSA1 | 158.45 |
| 5 | TKY889         | 76.73  | 3.68                        | frame           | HSA1 | 152.8  |
| 5 | RUSC1          | 102.98 | 6.01                        | frame           | HSA1 | 153.56 |
| 5 | KIAA0907       | 113.41 | 6.01                        | frame           | HSA1 | 154.15 |
| 5 | GBA            | 113.41 | 6.01                        | frame_identical | HSA1 | 153.47 |
| 5 | PKLR           | 113.41 | 6.01                        | frame_identical | HSA1 | 153.53 |
| 5 | KRTCAP2        | 123.89 | 2.59                        | placed          | HSA1 | 153.41 |
| 5 | TPM3           | 127.48 | 2.23                        | frame           | HSA1 | 152.40 |

|   |          |        |                     |                 |      |        |
|---|----------|--------|---------------------|-----------------|------|--------|
| 5 | S100A1   | 134.89 | 2.4                 | placed          | HSA1 | 151.87 |
| 5 | S100A9   | 138.46 | 2.23                | frame           | HSA1 | 151.60 |
| 5 | TKY644   | 138.46 | 2.23                | frame_identical |      |        |
| 5 | S100A7   | 142.16 | 1.3                 | placed          | HSA1 | 151.70 |
| 5 | TKY489   | 167.45 | 1.75                | frame           | HSA1 | 155    |
| 5 | PRKAB2   | 193.67 | 3.74                | frame           | HSA1 | 145.09 |
| 5 | UMNe604  | 206.8  | 2.4                 | placed          | HSA1 | 146.6  |
| 5 | TXNIP    | 210.06 | 2.06                | frame           | HSA1 | 144.15 |
| 5 | BCL9     | 224.44 | 2.44                | frame           | HSA1 | 145.48 |
| 5 | 5STS01   | 235.98 | 4.16                | frame           |      |        |
| 5 | CTSK     | 256.88 | 4.35                | frame           | HSA1 | 149.04 |
| 5 | LASS2    | 264.28 | 2.65                | placed          | HSA1 | 149.20 |
| 5 | APH1A    | 267.86 | 4.35                | frame           | HSA1 | 148.50 |
| 5 | TDRKH    | 281.81 | 4.41                | frame           | HSA1 | 150.01 |
| 5 | UMNe481  | 291.37 | 4.41                | frame           | HSA1 | 149.4  |
| 5 | TKY847   | 308.82 | 4.52                | frame           |      |        |
| 5 | UMNe477  | ---    | [ATP1A2 - CASQ1]    | binned          |      |        |
| 5 | TKY521   | ---    | [ATP1A2 - CASQ1]    | binned          |      |        |
| 5 | AHT050   | ---    | [TPM3 - TKY489]     | binned          |      |        |
| 5 | JTB      | ---    | [KIAA0907 - S100A9] | binned          | HSA1 | 152.21 |
| 5 | C1orf43  | ---    | [KIAA0907 - S100A9] | binned          | HSA1 | 152.45 |
| 5 | GJA5     | ---    | [PRKAB2 - BCL9]     | binned          | HSA1 | 145.70 |
| 5 | UMNe555  | ---    | [CTSK - TDRKH]      | binned          |      |        |
| 5 | TKY1078  | ---    | [PRKAB2 - BCL9]     | binned          | HSA1 | 146    |
| 5 | 5STS02   | 0      | 3.72                | frame           |      |        |
| 5 | GDAP2    | 14.03  | 3.72                | frame           | HSA1 | 118.21 |
| 5 | CD2      | 28.93  | 3.78                | frame           | HSA1 | 117.10 |
| 5 | UMNe515  | 41.06  | 3.78                | frame           | HSA1 | 116.4  |
| 5 | BCAS2    | 74.39  | 2.27                | frame           | HSA1 | 114.91 |
| 5 | AMPD1    | 93.57  | 2.27                | frame           | HSA1 | 115.02 |
| 5 | TSHB     | 96.57  | 2.38                | placed          | HSA1 | 115.37 |
| 5 | UMNe255  | 102.73 | 2.46                | placed          |      |        |
| 5 | NGFB     | 109.12 | 0.13                | placed          | HSA1 | 115.63 |
| 5 | COR023   | 112.3  | 4.25                | frame           |      |        |
| 5 | CASQ2    | 129.62 | 4.25                | frame           | HSA1 | 116.04 |
| 5 | WNT2B    | 168.92 | 6.38                | frame           | HSA1 | 112.81 |
| 5 | SLC16A1  | 188.9  | 4.17                | frame           | HSA1 | 113.26 |
| 5 | UCDEQ304 | 192.25 | 2.55                | placed          |      |        |
| 5 | OVGP1    | 198.92 | 4.17                | frame           | HSA1 | 111.76 |
| 5 | HMS05    | 212.73 | 6.76                | frame           | HSA1 | 111.1  |
| 5 | TKY331   | 212.73 | 6.76                | frame_identical | HSA1 | 110.9  |
| 5 | GSTM3    | 226.55 | 6.77                | frame           | HSA1 | 110.08 |
| 5 | TKY616   | 226.55 | 6.77                | frame_identical |      |        |
| 5 | TKY334   | 226.55 | 6.77                | frame_identical | HSA1 | 110.2  |

|   |         |        |                       |                 |      |        |
|---|---------|--------|-----------------------|-----------------|------|--------|
| 5 | CELSR2  | 237.21 | 5.38                  | frame           | HSA1 | 109.59 |
| 5 | TKY544  | 245.1  | 0.39                  | placed          | HSA1 | 108.9  |
| 5 | HIAT1   | 249.06 | 5.38                  | frame           | HSA1 | 100.28 |
| 5 | HTG15   | 261.78 | 0.4                   | placed          | HSA1 | 108.1  |
| 5 | TKY774  | 286.49 | 2.12                  | placed          |      |        |
| 5 | TKY1117 | 295.97 | 4.43                  | frame           |      |        |
| 5 | UMNe190 | 318.56 | 4.18                  | frame           |      |        |
| 5 | LEX069  | 329.98 | 4.18                  | frame           |      |        |
| 5 | LRRC39  | 346.47 | 5.77                  | frame           | HSA1 | 100.39 |
| 5 | AGL     | 346.47 | 5.77                  | frame_identical | HSA1 | 100.09 |
| 5 | VCAM1   | 350.75 | 2.51                  | placed          | HSA1 | 100.96 |
| 5 | TKY739  | 360.18 | 4.94                  | frame           |      |        |
| 5 | GNAI3   | 390.32 | 4.22                  | frame           | HSA1 | 109.89 |
| 5 | UMNe383 | ---    | [WNT2B -<br>OVGP1]    | binned          |      |        |
| 5 | ADORA3  | ---    | [SLC16A1 -<br>HMS05]  | binned          | HSA1 | 111.83 |
| 5 | UMNe361 | ---    | [OVGP1 -<br>GSTM3]    | binned          | HSA1 | 110.9  |
| 5 | TKY673  | ---    | [GDAP2 -<br>UMNe515]  | binned          | HSA1 | 117    |
| 5 | UMNe306 | ---    | [5STS02 -<br>CD2]     | binned          |      |        |
| 5 | EDG1    | ---    | [LEX069 -<br>TKY739]  | binned          | HSA1 | 101.48 |
| 5 | UMNe582 | ---    | [TKY1117 -<br>LRRC39] | binned          |      |        |
| 5 | LEX034  | 0      | 0.34                  | placed          | HSA1 | 88.1   |
| 5 | GBP1    | 12.26  | 4.23                  | frame           | HSA1 | 89.29  |
| 5 | GTF2B   | 12.26  | 4.23                  | frame_identical | HSA1 | 89.09  |
| 5 | GBP2    | 17.65  | 0.36                  | placed          | HSA1 | 89.35  |
| 5 | CDC7    | 33.75  | 4.23                  | frame           | HSA1 | 91.74  |
| 5 | UMNe536 | 62.54  | 4.88                  | frame           |      |        |
| 5 | CLCA1   | 105.91 | 4.33                  | frame           | HSA1 | 86.71  |
| 5 | SH3GLB1 | 105.91 | 4.33                  | frame_identical | HSA1 | 86.94  |
| 5 | CYR61   | 115.04 | 3.51                  | placed          | HSA1 | 85.82  |
| 5 | ASB10   | 124.33 | 3.67                  | placed          | HSA1 | 85.7   |
| 5 | BXDC5   | 142.9  | 4.02                  | frame           | HSA1 | 84.72  |
| 5 | TKY389  | 181.4  | 4.48                  | frame           |      |        |
| 5 | LPHN2   | 198.07 | 4.48                  | frame           | HSA1 | 82.04  |
| 5 | TKY525  | 210.06 | 4.48                  | frame           |      |        |
| 5 | TKY911  | 213.9  | 2.56                  | placed          |      |        |
| 5 | FUBP1   | 225.89 | 1.67                  | frame           | HSA1 | 78.10  |
| 5 | ZZZ3    | 237.43 | 1.67                  | frame           | HSA1 | 77.80  |
| 5 | PIGK    | 237.43 | 1.67                  | frame_identical | HSA1 | 77.33  |
| 5 | ACADM   | 241.13 | 2.46                  | placed          | HSA1 | 75.96  |
| 5 | LEX014  | 244.86 | 2.46                  | placed          | HSA1 | 73.3   |
| 5 | UMNe455 | 264.98 | 4.36                  | frame           |      |        |
| 5 | ZRANB2  | 290.01 | 5.6                   | frame           | HSA1 | 71.30  |
| 5 | DEPDC1  | 307.43 | 6.84                  | frame           | HSA1 | 68.71  |
| 5 | MIER1   | 337.82 | 5.89                  | frame           | HSA1 | 67.16  |
| 5 | PDE4B   | 346.58 | 2.27                  | placed          | HSA1 | 66.03  |

|   |         |        |                      |                 |      |       |
|---|---------|--------|----------------------|-----------------|------|-------|
| 5 | LEPR    | 350.75 | 5.89                 | frame           | HSA1 | 65.66 |
| 5 | 5STS03  | 354.91 | 0.37                 | placed          |      |       |
| 5 | USP1    | 391.52 | 5.94                 | frame           | HSA1 | 62.67 |
| 5 | UMNe237 | 391.52 | 5.94                 | frame_identical |      |       |
| 5 | PGM1    | 391.52 | 5.94                 | frame_identical | HSA1 | 63.83 |
| 5 | AHT107  | 391.52 | 5.94                 | frame_identical |      |       |
| 5 | ZuBeEq2 | ---    | [UMNe536 -<br>BXDC5] | binned          | HSA1 | 86.8  |
| 5 | TKY801  | ---    | [FUBP1 -<br>UMNe455] | binned          | HSA1 | 76.3  |
| 5 | UMNe534 | ---    | [GBP1 -<br>UMNe536]  | binned          |      |       |

| <b>Horse<br/>Chr.</b> | <b>Marker</b> | <b>Map<br/>Position<br/>(cR)</b> | <b>Placement<br/>LOD</b> | <b>Assignment</b> | <b>Human<br/>Chr.</b> | <b>Human<br/>Mb (Build<br/>36.1)</b> |
|-----------------------|---------------|----------------------------------|--------------------------|-------------------|-----------------------|--------------------------------------|
| 6                     | MAP2          | 0                                | 1.49                     | frame             | HSA2                  | 210.15                               |
| 6                     | MYL1          | 10.43                            | 1.49                     | frame             | HSA2                  | 210.86                               |
| 6                     | CPS1          | 14.04                            | 0.14                     | placed            | HSA2                  | 211.13                               |
| 6                     | ERBB4         | 32.89                            | 2.34                     | frame             | HSA2                  | 211.95                               |
| 6                     | HTG31         | 62.04                            | 0.54                     | placed            |                       |                                      |
| 6                     | COR019        | 68.58                            | 1.99                     | frame             | HSA2                  | 214.4                                |
| 6                     | UMNe248       | 75.15                            | 1.46                     | placed            | HSA2                  | 215.2                                |
| 6                     | ATIC          | 78.53                            | 1.99                     | frame             | HSA2                  | 215.89                               |
| 6                     | 6STS01        | 82                               | 2.51                     | placed            |                       |                                      |
| 6                     | UMNe203       | 96.89                            | 2.49                     | placed            |                       |                                      |
| 6                     | UMNe087       | 96.89                            | 2.49                     | placed            | HSA2                  | 218.8                                |
| 6                     | TKY543        | 96.89                            | 1.18                     | placed            | HSA2                  | 216.9                                |
| 6                     | SMARCA1       | 100.36                           | 4.53                     | frame             | HSA2                  | 216.99                               |
| 6                     | RNF25         | 107.3                            | 2.73                     | placed            | HSA2                  | 219.24                               |
| 6                     | PLCD4         | 107.3                            | 2.73                     | placed            | HSA2                  | 219.18                               |
| 6                     | PRKAG3        | 114.46                           | 3.94                     | frame             | HSA2                  | 219.40                               |
| 6                     | IHH           | 121.87                           | 2.42                     | placed            | HSA2                  | 219.63                               |
| 6                     | ATG9A         | 125.71                           | 3.94                     | frame             | HSA2                  | 219.79                               |
| 6                     | DES           | 125.71                           | 3.94                     | frame_identical   | HSA2                  | 219.99                               |
| 6                     | INHA          | 129.7                            | 2.33                     | placed            | HSA2                  | 220.15                               |
| 6                     | PAX3          | 151.56                           | 4.3                      | frame             | HSA2                  | 222.77                               |
| 6                     | SCG2          | 176.71                           | 3.93                     | frame             | HSA2                  | 224.17                               |
| 6                     | UMNe337       | 188.26                           | 3.93                     | frame             |                       |                                      |
| 6                     | CUL3          | 188.26                           | 3.93                     | frame_identical   | HSA2                  | 225.04                               |
| 6                     | COR010        | 204.29                           | 2.44                     | placed            | HSA2                  | 226.9                                |
| 6                     | IRS1          | 207.99                           | 4.19                     | frame             | HSA2                  | 227.31                               |
| 6                     | COL4A4        | 207.99                           | 4.19                     | frame_identical   | HSA2                  | 227.58                               |
| 6                     | NVHEQ082      | 207.99                           | 4.19                     | frame_identical   | HSA2                  | 227.9                                |
| 6                     | UMNe197       | 219.54                           | 3.89                     | frame             | HSA2                  | 228.5                                |
| 6                     | ARL4C         | 231.55                           | 3.89                     | frame             | HSA2                  | 235.07                               |
| 6                     | TKY312        | 239.54                           | 4.48                     | placed            |                       |                                      |
| 6                     | CAB39         | 271.29                           | 2.39                     | placed            | HSA2                  | 231.29                               |
| 6                     | NCL           | 296.33                           | 9.08                     | frame             | HSA2                  | 232.03                               |
| 6                     | CHRNA         | 323.52                           | 5.21                     | frame             | HSA2                  | 233.11                               |

|   |           |        |                     |                 |       |        |
|---|-----------|--------|---------------------|-----------------|-------|--------|
| 6 | UMNe233   | 327.1  | 2.24                | placed          |       |        |
| 6 | LEX065    | 334.26 | 2.28                | placed          |       |        |
| 6 | UGT1A1    | 337.86 | 5.16                | frame           | HSA2  | 234.33 |
| 6 | TKY1090   | 364.3  | 5.16                | frame           |       |        |
| 6 | TKY1001   | ---    | [ATG9A - SCG2]      | binned          | HSA2  | 223.5  |
| 6 | UMNe177   | ---    | [ATG9A - SCG2]      | binned          |       |        |
| 6 | UMNe195   | ---    | [PRKAG3 - PAX3]     | binned          |       |        |
| 6 | TKY723    | ---    | [COR019 - SMARCAL1] | binned          |       |        |
| 6 | FN1       | ---    | [COR019 - SMARCAL1] | binned          | HSA2  | 215.93 |
| 6 | TKY556    | ---    | [NCL - UGT1A1]      | binned          | HSA2  | 233.1  |
| 6 | HDAC4     | 0      | 3.69                | frame           | HSA2  | 239.64 |
| 6 | NDUFA10   | 10.58  | 3.69                | frame           | HSA2  | 240.55 |
| 6 | PPP1R7    | 31.74  | 1.6                 | placed          | HSA2  | 241.74 |
| 6 | HDLBP     | 34.08  | 3.69                | frame           | HSA2  | 241.82 |
| 6 | TKY1087   | 0      | 6.77                | frame           | HSA12 | 2.4    |
| 6 | TKY2815   | 20.2   | 0.22                | placed          | HSA12 | 2.1    |
| 6 | ADIPOR2   | 29.45  | 5.35                | frame           | HSA12 | 1.67   |
| 6 | NINJ2     | 38.71  | 5.35                | frame           | HSA12 | 0.54   |
| 6 | FKBP4     | 44.87  | 4.4                 | placed          | HSA12 | 2.77   |
| 6 | ATP6V1E1  | 65.06  | 0.59                | placed          | HSA22 | 16.45  |
| 6 | PARP11    | 117.58 | 6.9                 | frame           | HSA12 | 3.79   |
| 6 | CCND2     | 117.58 | 6.9                 | frame_identical | HSA12 | 4.25   |
| 6 | TKY744    | 125.84 | 3.96                | placed          | HSA12 | 5.7    |
| 6 | TKY411    | 125.84 | 3.96                | placed          |       |        |
| 6 | TKY1892   | 129.8  | 4.45                | placed          | HSA12 | 5.5    |
| 6 | VWF       | 137.44 | 6.9                 | frame           | HSA12 | 5.93   |
| 6 | UMNe472   | 157.31 | 0.82                | frame           |       |        |
| 6 | TPI1      | 175.37 | 0.82                | frame           | HSA12 | 6.85   |
| 6 | TKY1745   | 194.36 | 1.06                | placed          | HSA12 | 9.1    |
| 6 | TKY030    | 207.31 | 2.32                | placed          |       |        |
| 6 | M6PR      | 211.62 | 3.33                | frame           | HSA12 | 8.98   |
| 6 | GNB3      | 211.62 | 3.33                | frame_identical | HSA12 | 6.82   |
| 6 | TKY377    | 211.62 | 3.33                | frame_identical | HSA12 | 8.9    |
| 6 | GABARAPL1 | 220.67 | 2.63                | placed          | HSA12 | 10.26  |
| 6 | KLRA1     | 225.19 | 4.37                | frame           | HSA12 | 10.63  |
| 6 | RERG      | 238.75 | 6.49                | frame           | HSA12 | 15.15  |
| 6 | ATF7IP    | 238.75 | 6.49                | frame_identical | HSA12 | 14.41  |
| 6 | TKY360    | 242.74 | 1.26                | placed          | HSA12 | 14.7   |
| 6 | TKY3278   | 250.71 | 3.96                | placed          | HSA12 | 15.9   |
| 6 | TKY3193   | 258.63 | 4.39                | frame           | HSA12 | 16.2   |
| 6 | TKY111    | 275.17 | 2.21                | frame           |       |        |
| 6 | TKY1433   | 283.8  | 0.34                | placed          | HSA12 | 18.5   |
| 6 | CMAS      | 288.31 | 0.13                | placed          | HSA12 | 22.09  |
| 6 | LDHB      | 292.62 | 2.18                | frame           | HSA12 | 21.68  |
| 6 | TKY1235   | 317.68 | 1.91                | frame           | HSA12 | 25.5   |
| 6 | SSPN      | 328.23 | 4.23                | placed          | HSA12 | 26.24  |



|   |          |        |                      |                 |       |       |
|---|----------|--------|----------------------|-----------------|-------|-------|
| 6 | TM7SF3   | 342.46 | 1.91                 | frame           | HSA12 | 27.02 |
| 6 | TKY1162  | 359    | 4.29                 | placed          | HSA12 | 27.6  |
| 6 | PTHLH    | 366.94 | 3.99                 | frame           | HSA12 | 28.00 |
| 6 | CCDC91   | 366.94 | 3.99                 | frame_identical | HSA12 | 28.30 |
| 6 | TKY829   | 386.91 | 4.04                 | frame           | HSA12 | 20    |
| 6 | C1QDC1   | 419.22 | 0.75                 | placed          | HSA12 | 30.75 |
| 6 | MGC50559 | 427.9  | 5.33                 | frame           | HSA12 | 31.70 |
| 6 | PRICKLE1 | 461.46 | 3.25                 | placed          | HSA12 | 41.14 |
| 6 | UCDEQ465 | 470.13 | 2.21                 | placed          |       |       |
| 6 | NVHEQ081 | 478.74 | 2.16                 | placed          | HSA12 | 38.7  |
| 6 | YAF2     | 482.71 | 5.05                 | frame           | HSA12 | 40.84 |
| 6 | TKY863   | 495.66 | 1.98                 | placed          |       |       |
| 6 | SFRS2IP  | 504.7  | 5.05                 | frame           | HSA12 | 44.60 |
| 6 | UMNe556  | 509.22 | 0.23                 | placed          | HSA12 | 44.1  |
| 6 | SLC38A2  | 513.74 | 2.38                 | placed          | HSA12 | 45.04 |
| 6 | TKY027   | 543.9  | 0.28                 | placed          |       |       |
| 6 | VDR      | 557.47 | 2.38                 | placed          | HSA12 | 46.52 |
| 6 | COL2A1   | 561.6  | 2.4                  | placed          | HSA12 | 46.65 |
| 6 | PFKM     | 565.56 | 2.05                 | frame           | HSA12 | 46.80 |
| 6 | COR070   | 565.56 | 2.05                 | frame_identical | HSA12 | 46.8  |
| 6 | CCNT1    | 569.52 | 0.28                 | placed          | HSA12 | 47.37 |
| 6 | TKY570   | 569.52 | 0.28                 | placed          | HSA12 | 47.6  |
| 6 | LIMA1    | 577.79 | 2.05                 | frame           | HSA12 | 48.86 |
| 6 | SCN8A    | 590.73 | 4.39                 | placed          | HSA12 | 50.27 |
| 6 | TKY323   | 595.05 | 2.16                 | placed          | HSA12 | 50.7  |
| 6 | PRR13    | 599.57 | 2.97                 | frame           | HSA12 | 52.12 |
| 6 | IGFBP6   | 599.57 | 2.97                 | frame_identical | HSA12 | 51.78 |
| 6 | EIF4B    | 599.57 | 2.97                 | frame_identical | HSA12 | 51.69 |
| 6 | TKY1474  | 599.57 | 2.97                 | frame_identical | HSA12 | 53.6  |
| 6 | TKY412   | 604.09 | 2.16                 | placed          |       |       |
| 6 | TKY1013  | 621.37 | 2.97                 | frame           | HSA12 | 52.7  |
| 6 | COR088   | ---    | [TKY1087 -<br>NINJ2] | binned          |       |       |
| 6 | KRAS     | ---    | [LDHB -<br>TM7SF3]   | binned          | HSA12 | 25.25 |
| 6 | UM015    | ---    | [VWF -<br>TPI1]      | binned          | HSA12 | 7.1   |
| 6 | DDX47    | ---    | [M6PR -<br>RERG]     | binned          | HSA12 | 12.86 |
| 6 | CLEC2B   | ---    | [TPI1 -<br>KLRA1]    | binned          | HSA12 | 9.90  |
| 6 | TKY1113  | ---    | [LIMA1 -<br>TKY1013] | binned          | HSA12 | 51.6  |
| 6 | RKJ06    | ---    | [LIMA1 -<br>TKY1013] | binned          |       |       |
| 6 | ATP5G2   | ---    | [LIMA1 -<br>TKY1013] | binned          | HSA12 | 52.35 |
| 6 | TKY025   | ---    | [SFRS2IP -<br>LIMA1] | binned          |       |       |
| 6 | TKY026   | ---    | [SFRS2IP -<br>LIMA1] | binned          |       |       |
| 6 | TKY028   | ---    | [SFRS2IP -<br>LIMA1] | binned          |       |       |

|   |         |        |                      |                 |       |       |
|---|---------|--------|----------------------|-----------------|-------|-------|
| 6 | TKY029  | ---    | [SFRS2IP - LIMA1]    | binned          |       |       |
| 6 | PRKAG1  | ---    | [SFRS2IP - LIMA1]    | binned          | HSA12 | 47.68 |
| 6 | TKY2582 | ---    | [YAF2 - PFKM]        | binned          | HSA12 | 43.2  |
| 6 | UMNe427 | ---    | [MGC50559 - SFRS2IP] | binned          | HSA12 | 40.3  |
| 6 | DNAJC14 | 0      | 3.76                 | frame           | HSA12 | 54.50 |
| 6 | ORMDL2  | 20.87  | 2.2                  | placed          | HSA12 | 54.55 |
| 6 | CD63    | 20.87  | 2.2                  | placed          | HSA12 | 54.41 |
| 6 | MYL6    | 26.11  | 3.76                 | frame           | HSA12 | 54.84 |
| 6 | SILV    | 26.11  | 3.76                 | frame_identical | HSA12 | 54.63 |
| 6 | CDK2    | 26.11  | 3.76                 | frame_identical | HSA12 | 54.65 |
| 6 | TKY284  | 26.11  | 3.76                 | frame_identical | HSA12 | 54.7  |
| 6 | TMEM4   | 31.06  | 2.25                 | placed          | HSA12 | 54.99 |
| 6 | COQ10A  | 31.06  | 2.25                 | placed          | HSA12 | 54.95 |
| 6 | PTGES3  | 31.06  | 2.25                 | placed          | HSA12 | 55.34 |
| 6 | ATP5B   | 31.06  | 2.25                 | placed          | HSA12 | 55.32 |
| 6 | UMNe216 | 31.06  | 2.25                 | placed          |       |       |
| 6 | STAC3   | 35.76  | 2.59                 | placed          | HSA12 | 55.92 |
| 6 | STAT6   | 35.76  | 2.59                 | placed          | HSA12 | 55.78 |
| 6 | TKY595  | 35.76  | 2.59                 | placed          | HSA12 | 55.8  |
| 6 | LRIG3   | 44.68  | 4.06                 | frame           | HSA12 | 57.55 |
| 6 | USP15   | 62.48  | 4.06                 | frame           | HSA12 | 60.94 |
| 6 | TKY952  | 71     | 2.35                 | placed          |       |       |
| 6 | GNS     | 79.92  | 1.97                 | placed          | HSA12 | 63.39 |
| 6 | WIF1    | 84.61  | 5.26                 | frame           | HSA12 | 63.73 |
| 6 | LEMD3   | 84.61  | 5.26                 | frame_identical | HSA12 | 63.85 |
| 6 | TKY843  | 126.12 | 4.6                  | frame           |       |       |
| 6 | IFNG    | 131.1  | 2.08                 | placed          | HSA12 | 66.83 |
| 6 | 6CA001  | 135.82 | 2.71                 | placed          | HSA12 | 67    |
| 6 | RAP1B   | 140.28 | 2.19                 | placed          | HSA12 | 67.29 |
| 6 | NUP107  | 144.54 | 4.22                 | frame           | HSA12 | 67.37 |
| 6 | TKY1159 | 153.05 | 3.82                 | placed          |       |       |
| 6 | TSPAN8  | 169.34 | 4.22                 | frame           | HSA12 | 69.81 |
| 6 | MMP19   | ---    | [p-terminal - MYL6]  | binned          | HSA12 | 54.52 |
| 6 | DGKA    | ---    | [DNAJC14 - LRIG3]    | binned          | HSA12 | 54.61 |
| 6 | DCTN2   | ---    | [MYL6 - USP15]       | binned          | HSA12 | 56.21 |
| 6 | TKY1613 | ---    | [MYL6 - USP15]       | binned          |       |       |

| Horse Chr. | Marker | Map Position (cR) | Placement LOD | Assignment | Human Chr. | Human Mb (Build 36.1) |
|------------|--------|-------------------|---------------|------------|------------|-----------------------|
| 7          | POLR2E | 0                 | 2.35          | frame      | HSA19      | 1.04                  |
| 7          | RPS15  | 10.69             | 0.29          | placed     | HSA19      | 1.39                  |

|   |            |        |                        |                 |       |        |
|---|------------|--------|------------------------|-----------------|-------|--------|
| 7 | TKY638     | 10.69  | 0.29                   | placed          |       |        |
| 7 | POLRMT     | 14.05  | 2.35                   | frame           | HSA19 | 0.57   |
| 7 | C19orf19   | 24.46  | 0.37                   | placed          | HSA19 | 0.41   |
| 7 | TKY1097    | 60.45  | 4.09                   | frame           |       |        |
| 7 | COR106     | 73.86  | 2.29                   | frame           |       |        |
| 7 | TKY1929    | 80.17  | 0.43                   | placed          | HSA19 | 4.7    |
| 7 | UHRF1      | 80.17  | 0.41                   | placed          | HSA19 | 4.86   |
| 7 | DPP9       | 89.95  | 2.29                   | frame           | HSA19 | 4.63   |
| 7 | TRIP10     | 117.81 | 1.5                    | placed          | HSA19 | 6.69   |
| 7 | C3         | 128.15 | 2.12                   | placed          | HSA19 | 6.63   |
| 7 | INSR       | 131.59 | 5.24                   | frame           | HSA19 | 7.07   |
| 7 | UMNe333    | 138.48 | 0.14                   | placed          |       |        |
| 7 | TKY931     | 170.97 | 1.13                   | placed          |       |        |
| 7 | TKY588     | 223.78 | 5.98                   | frame           | HSA19 | 7.7    |
| 7 | TKY1029    | 290.54 | 2.14                   | frame           | HSA11 | 98.4   |
| 7 | TKY1007    | 317.32 | 2.14                   | frame           |       |        |
| 7 | TKY724     | 337.34 | 2.83                   | frame           |       |        |
| 7 | HTG20      | 361.12 | 0.13                   | placed          |       |        |
| 7 | BIRC3      | 365.08 | 1.88                   | frame           | HSA11 | 101.69 |
| 7 | BIRC2      | 365.08 | 1.88                   | frame_identical | HSA11 | 101.72 |
| 7 | DCUN1D5    | 369.21 | 0.67                   | placed          | HSA11 | 102.44 |
| 7 | TKY506     | 377.84 | 1.88                   | frame           | HSA11 | 106.3  |
| 7 | RDX        | 400.46 | 5.11                   | frame           | HSA11 | 109.61 |
| 7 | ZuBeEq11   | 418.55 | 5.11                   | frame           |       |        |
| 7 | 7CA001     | 466.71 | 2.33                   | frame           |       |        |
| 7 | HTR3A      | 498.68 | 0.18                   | placed          | HSA11 | 113.35 |
| 7 | NCAM1      | 503.99 | 2.33                   | frame           | HSA11 | 112.34 |
| 7 | TKY012     | 509.31 | 2.35                   | placed          | HSA11 | 112.6  |
| 7 | DRD2       | 509.31 | 2.35                   | placed          | HSA11 | 112.79 |
| 7 | TKY035     | 519.94 | 3.57                   | frame           | HSA11 | 113.4  |
| 7 | TKY034     | 519.94 | 3.57                   | frame_identical |       |        |
| 7 | APOA4      | 556.54 | 1.13                   | frame           | HSA11 | 116.20 |
| 7 | APOC3      | 567.87 | 0.85                   | placed          | HSA11 | 116.21 |
| 7 | POU2F3     | 573.54 | 0.94                   | frame           | HSA11 | 119.62 |
| 7 | LEX015/038 | 573.54 | 0.94                   | frame_identical | HSA11 | 120.8  |
| 7 | TKY461     | 591.77 | 0.94                   | frame           |       |        |
| 7 | TKY348     | 624.93 | 2.01                   | frame           | HSA11 | 115.5  |
| 7 | TKY946     | 624.93 | 2.01                   | frame_identical |       |        |
| 7 | TKY703     | 636.28 | 2.44                   | placed          | HSA11 | 114.4  |
| 7 | UMNe356    | 663.06 | 2.12                   | placed          |       |        |
| 7 | CADM1      | 667.37 | 2.55                   | frame           | HSA11 | 114.55 |
| 7 | TKY1518    | 675.63 | 2.67                   | placed          | HSA11 | 126    |
| 7 | ETS1       | 683.56 | 2.55                   | frame           | HSA11 | 127.83 |
| 7 | TKY1062    | 683.56 | 2.55                   | frame_identical |       |        |
| 7 | TKY957     | ---    | [TKY506 -<br>ZuBeEq11] | binned          | HSA11 | 109.6  |
| 7 | TKY1107    | ---    | [TKY1007 -<br>BIRC3]   | binned          | HSA11 | 100.2  |
| 7 | TKY618     | ---    | [DPP9 -<br>TKY588]     | binned          |       |        |
| 7 | TKY2366    | ---    | [TKY1097 -             | binned          | HSA19 | 3.2    |

|   |         |        |          |                 |       |        |
|---|---------|--------|----------|-----------------|-------|--------|
|   |         |        | DPP9]    |                 |       |        |
| 7 | LONP1   | ---    | [DPP9 -  | binned          | HSA19 | 5.64   |
|   |         |        | TKY588]  |                 |       |        |
| 7 | HESTG07 | ---    | [APOA4 - | binned          | HSA11 | 116.5  |
|   |         |        | TKY461]  |                 |       |        |
| 7 | THY1    | ---    | [APOA4 - | binned          | HSA11 | 118.79 |
|   |         |        | TKY461]  |                 |       |        |
| 7 | TKY005  | 0      | 0        | frame           |       |        |
| 7 | TKY283  | 2.73   | 1.07     | placed          |       |        |
| 7 | VHL108  | 11.33  | 1.5      | placed          |       |        |
| 7 | UMNe425 | 34.03  | 0        | frame           |       |        |
| 7 | TKY476  | 0      | 2.49     | frame           |       |        |
| 7 | TKY858  | 18.68  | 2.2      | placed          |       |        |
| 7 | HTG33   | 18.68  | 2.2      | placed          |       |        |
| 7 | NFIX    | 30.27  | 2.53     | frame           | HSA19 | 12.97  |
| 7 | TKY574  | 70.85  | 4.28     | frame           |       |        |
| 7 | TKY1112 | 93.81  | 3.84     | frame           |       |        |
| 7 | ACP5    | 107.58 | 3.84     | frame           | HSA19 | 11.55  |
| 7 | PDE4A   | 133.11 | 5.31     | frame           | HSA19 | 10.42  |
| 7 | OLFM2   | 142.4  | 4.1      | placed          | HSA19 | 9.83   |
| 7 | TKY272  | 146.64 | 4.47     | placed          |       |        |
| 7 | COR004  | 159.2  | 3.8      | frame           |       |        |
| 7 | LEX045  | 166.92 | 0.23     | placed          |       |        |
| 7 | UMNe093 | 170.53 | 1.01     | frame           |       |        |
| 7 | UMNe359 | 188.85 | 1.01     | frame           |       |        |
| 7 | TKY512  | 235.81 | 1.78     | frame           | HSA11 | 92     |
| 7 | COR095  | 243.53 | 1.09     | placed          | HSA11 | 92.1   |
| 7 | TKY822  | 251.56 | 1.78     | frame           | HSA11 | 91.7   |
| 7 | UMNe565 | 280.55 | 3.84     | frame           |       |        |
| 7 | UMNe606 | 294.33 | 3.84     | frame           |       |        |
| 7 | 7STS02  | 316.22 | 4.24     | frame           |       |        |
| 7 | TKY927  | 0      | 1.46     | placed          | HSA11 | 81.9   |
| 7 | UMNe459 | 3.92   | 3.22     | frame           |       |        |
| 7 | TKY338  | 29.75  | 2.26     | placed          | HSA11 | 79.3   |
| 7 | TKY757  | 37.56  | 4.21     | frame           | HSA11 | 78.8   |
| 7 | THRSP   | 52.16  | 6.1      | frame           | HSA11 | 77.45  |
| 7 | 7STS01  | 66.3   | 6.19     | frame           |       |        |
| 7 | TKY282  | 77.62  | 0.12     | placed          |       |        |
| 7 | UCP2    | 101.3  | 6.19     | frame           | HSA11 | 73.36  |
| 7 | UCP3    | 101.3  | 6.19     | frame_identical | HSA11 | 73.39  |
| 7 | TKY690  | 114.62 | 2.34     | placed          | HSA11 | 71.8   |
| 7 | CLPB    | 114.62 | 2.34     | placed          | HSA11 | 71.68  |
| 7 | SGCV28  | 114.62 | 2.34     | placed          | HSA11 | 71.9   |
| 7 | IL18BP  | 120.6  | 3.7      | frame           | HSA11 | 71.39  |
| 7 | NUP98   | 129.59 | 3.7      | frame           | HSA11 | 3.65   |
| 7 | TPP1    | 155.43 | 1.92     | frame           | HSA11 | 6.59   |
| 7 | TKY986  | 176.75 | 1.92     | frame           |       |        |
| 7 | TUB     | 200.44 | 1.95     | frame           | HSA11 | 8.02   |
| 7 | HBB     | 220.55 | 2.24     | placed          | HSA11 | 5.20   |
| 7 | UMNe574 | 236.38 | 2.17     | frame           |       |        |
| 7 | UMNe074 | 242.5  | 0.67     | placed          |       |        |

|   |         |        |                        |                 |       |       |
|---|---------|--------|------------------------|-----------------|-------|-------|
| 7 | UMNe100 | 248.77 | 2.53                   | frame           | HSA11 | 9.7   |
| 7 | CTR9    | 258.58 | 4.8                    | frame           | HSA11 | 10.73 |
| 7 | TKY1058 | 268.66 | 3.07                   | frame           |       |       |
| 7 | PTH     | 283.36 | 3.07                   | frame           | HSA11 | 13.47 |
| 7 | TKY884  | ---    | [TKY986 -<br>UMNe574]  | binned          |       |       |
| 7 | TKY2165 | ---    | [TKY986 -<br>UMNe574]  | binned          | HSA11 | 8.2   |
| 7 | XLKD1   | ---    | [UMNe100 -<br>TKY1058] | binned          | HSA11 | 10.54 |
| 7 | TKY624  | ---    | [TUB -<br>UMNe100]     | binned          | HSA11 | 5.6   |
| 7 | SOX6    | 0      | 2.78                   | frame           | HSA11 | 15.95 |
| 7 | LDHA    | 4.79   | 0.8                    | placed          | HSA11 | 18.37 |
| 7 | UEVLD   | 9.89   | 1.72                   | placed          | HSA11 | 18.5  |
| 7 | TKY839  | 15.29  | 2.38                   | placed          |       |       |
| 7 | ABCC8   | 27.5   | 2.36                   | placed          | HSA11 | 17.37 |
| 7 | AHT019  | 27.5   | 2.38                   | placed          |       |       |
| 7 | BDNF    | 33.24  | 1.91                   | frame           | HSA11 | 27.63 |
| 7 | TKY380  | 38.98  | 0.57                   | placed          | HSA11 | 25.6  |
| 7 | TKY1294 | 49.71  | 1.91                   | frame           | HSA11 | 22.4  |
| 7 | TKY613  | 49.71  | 1.91                   | frame_identical | HSA11 | 22.5  |
| 7 | TKY1177 | 76.34  | 3.95                   | frame           |       |       |
| 7 | TKY1147 | 81.42  | 0.23                   | placed          |       |       |
| 7 | TKY3464 | 91.54  | 3.54                   | frame           | HSA11 | 30.7  |
| 7 | PAX6    | 113.13 | 3.54                   | frame           | HSA11 | 31.77 |
| 7 | TKY2512 | ---    | [SOX6 -<br>TKY1294]    | binned          | HSA11 | 20.1  |

| Horse<br>Chr. | Marker  | Map<br>Position<br>(cR) | Placement<br>LOD | Assignment      | Human<br>Chr. | Human<br>Mb (Build<br>36.1) |
|---------------|---------|-------------------------|------------------|-----------------|---------------|-----------------------------|
| 8             | XBP1    | 0                       | 3.04             | frame           | HSA22         | 27.52                       |
| 8             | ASCC2   | 16.63                   | 3.04             | frame           | HSA22         | 28.51                       |
| 8             | TKY985  | 30.24                   | 2.38             | placed          |               |                             |
| 8             | PES1    | 40.3                    | 4.05             | frame           | HSA22         | 29.30                       |
| 8             | TKY904  | 40.3                    | 4.05             | frame_identical |               |                             |
| 8             | UBE2L3  | 83.98                   | 3.2              | frame           | HSA22         | 20.25                       |
| 8             | COMT    | 119.52                  | 8.02             | frame           | HSA22         | 18.31                       |
| 8             | AHT005  | 126.83                  | 4.06             | placed          |               |                             |
| 8             | DGCR14  | 133.87                  | 6.31             | placed          | HSA22         | 17.50                       |
| 8             | SCARF2  | 140.84                  | 6.62             | frame           | HSA22         | 19.11                       |
| 8             | BCR     | 151.31                  | 4.78             | frame           | HSA22         | 21.85                       |
| 8             | ADORA2A | 161.39                  | 2.57             | frame           | HSA22         | 23.16                       |
| 8             | SNRPD3  | 175.75                  | 1.45             | placed          | HSA22         | 23.28                       |
| 8             | COR097  | 182.89                  | 2.57             | frame           | HSA22         | 22.7                        |
| 8             | AHT025  | 219.41                  | 7.16             | frame           |               |                             |
| 8             | TKY994  | 275.1                   | 0.65             | frame           | HSA22         | 24.7                        |
| 8             | TKY1161 | 293.67                  | 0.65             | frame           |               |                             |
| 8             | TKY620  | 308.59                  | 1.05             | placed          | HSA22         | 24.9                        |
| 8             | GIT2    | 315.78                  | 2.06             | placed          | HSA12         | 108.85                      |

|   |          |        |                       |                 |       |        |
|---|----------|--------|-----------------------|-----------------|-------|--------|
| 8 | UBE3B    | 315.78 | 2.11                  | placed          | HSA12 | 108.40 |
| 8 | SART3    | 319.34 | 2.11                  | placed          | HSA12 | 107.44 |
| 8 | RNF10    | 326.48 | 5.66                  | frame           | HSA12 | 119.46 |
| 8 | GCN1L1   | 344.45 | 2.35                  | frame           | HSA12 | 119.05 |
| 8 | UMNe070  | 357.93 | 0.67                  | frame           | HSA12 | 118.4  |
| 8 | PRKAB1   | 370.68 | 0.67                  | frame           | HSA12 | 118.59 |
| 8 | TKY458   | 416.35 | 1.86                  | frame           | HSA12 | 116.2  |
| 8 | WSB2     | 445.64 | 1.86                  | frame           | HSA12 | 116.95 |
| 8 | UMNe532  | ---    | [TKY458 - q-terminal] | binned          | HSA12 | 117    |
| 8 | THRAP2   | 0      | 0.85                  | frame           | HSA12 | 114.88 |
| 8 | TKY436   | 13.86  | 0.74                  | placed          | HSA12 | 113.5  |
| 8 | UCDEQ046 | 27.76  | 0.85                  | frame           |       |        |
| 8 | TBX5     | 42.39  | 0.85                  | frame           | HSA12 | 113.28 |
| 8 | UM034    | 46.81  | 0.87                  | placed          |       |        |
| 8 | AHT131   | 51.03  | 1.64                  | placed          |       |        |
| 8 | TPCN1    | 59.89  | 0.92                  | placed          | HSA12 | 112.14 |
| 8 | AHT130   | ---    | [THRAP2 - TBX5]       | binned          |       |        |
| 8 | ATXN2    | 0      | 3.78                  | frame           | HSA12 | 110.37 |
| 8 | ATP2A2   | 11.61  | 3.78                  | frame           | HSA12 | 109.20 |
| 8 | PSMD9    | 23.23  | 6.36                  | frame           | HSA12 | 120.81 |
| 8 | VPS33A   | 23.23  | 6.36                  | frame_identical | HSA12 | 121.28 |
| 8 | RSRC2    | 45.49  | 3.75                  | frame           | HSA12 | 121.56 |
| 8 | TKY470   | 73.57  | 1.45                  | frame           |       |        |
| 8 | SCARB1   | 85.18  | 1.45                  | frame           | HSA12 | 123.83 |
| 8 | SBNO1    | 92.38  | 2.44                  | placed          | HSA12 | 122.35 |
| 8 | TKY669   | 107.9  | 3.25                  | frame           | HSA12 | 124.4  |
| 8 | UMNe385  | 133.35 | 3.77                  | frame           | HSA12 | 125.9  |
| 8 | SLC15A4  | 155.33 | 3.77                  | frame           | HSA12 | 127.84 |
| 8 | LEX023   | 155.33 | 3.77                  | frame_identical |       |        |
| 8 | UMNe579  | 187.86 | 3.92                  | frame           |       |        |
| 8 | LEX029   | 224.6  | 2.44                  | placed          |       |        |
| 8 | PIWIL1   | 227.88 | 3.35                  | frame           | HSA12 | 129.39 |
| 8 | SFRS8    | 258.45 | 3.35                  | frame           | HSA12 | 130.76 |
| 8 | TKY1157  | ---    | [UMNe579 - SFRS8]     | binned          | HSA12 | 129.2  |
| 8 | EPB41L3  | 0      | 3.62                  | frame           | HSA18 | 5.38   |
| 8 | TKY1045  | 0      | 3.62                  | frame_identical | HSA18 | 5.4    |
| 8 | PTPRM    | 41.52  | 1.8                   | frame           | HSA18 | 7.56   |
| 8 | NDUFV2   | 47.84  | 1.44                  | placed          | HSA18 | 9.09   |
| 8 | VAPA     | 70.93  | 1.8                   | frame           | HSA18 | 9.90   |
| 8 | UMNe545  | 78.28  | 0.19                  | placed          | HSA18 | 10.2   |
| 8 | FAM38B   | 88.96  | 4.04                  | frame           | HSA18 | 10.66  |
| 8 | VHL073   | 100.4  | 4.04                  | frame           |       |        |
| 8 | MPPE1    | 115.68 | 5.74                  | frame           | HSA18 | 11.87  |
| 8 | UMNe578  | 115.68 | 5.74                  | frame_identical | HSA18 | 11.7   |
| 8 | RBBP8    | 122.79 | 4.32                  | placed          | HSA18 | 18.77  |
| 8 | TKY653   | 122.79 | 4.32                  | placed          | HSA18 | 18.6   |

|   |          |        |                         |                 |       |       |
|---|----------|--------|-------------------------|-----------------|-------|-------|
| 8 | ROCK1    | 141.28 | 5.76                    | frame           | HSA18 | 16.79 |
| 8 | ASB14    | 141.28 | 5.76                    | frame_identical |       |       |
| 8 | TYMS     | 141.28 | 5.76                    | frame_identical | HSA18 | 0.65  |
| 8 | LPIN2    | 147.95 | 1.86                    | placed          | HSA18 | 2.91  |
| 8 | TKY391   | 158    | 2.88                    | frame           | HSA18 | 3.4   |
| 8 | TKY1056  | 174.47 | 2.88                    | frame           |       |       |
| 8 | UMNe238  | 190.93 | 0.85                    | placed          | HSA18 | 4.3   |
| 8 | LAMA1    | 213.18 | 1.91                    | placed          | HSA18 | 6.93  |
| 8 | AHT003   | 216.73 | 2.56                    | frame           |       |       |
| 8 | COR012   | 235.21 | 2.56                    | frame           | HSA18 | 20.5  |
| 8 | TKY813   | 258.26 | 3.69                    | frame           | HSA18 | 22.6  |
| 8 | CDH2     | 276.75 | 3.69                    | frame           | HSA18 | 23.78 |
| 8 | DSC2     | 305.63 | 6.71                    | frame           | HSA18 | 26.90 |
| 8 | UMNe164  | 332.59 | 3.31                    | frame           |       |       |
| 8 | TKY955   | 363.01 | 0.17                    | placed          |       |       |
| 8 | MOCOS    | 366.95 | 2.76                    | frame           | HSA18 | 32.02 |
| 8 | GALNT1   | 366.95 | 2.76                    | frame_identical | HSA18 | 31.49 |
| 8 | SGCV32   | 383.47 | 1.41                    | frame           |       |       |
| 8 | UMNe479  | 391.08 | 1.71                    | placed          | HSA18 | 33.6  |
| 8 | TKY509   | 402.96 | 1.41                    | frame           | HSA18 | 33.4  |
| 8 | TKY2159  | ---    | [CDH2 -<br>UMNe164]     | binned          | HSA18 | 27.2  |
| 8 | UMNe211  | ---    | [p-terminal -<br>PTPRM] | binned          |       |       |
| 8 | SMAD2    | 0      | 2.81                    | frame           | HSA18 | 43.62 |
| 8 | ACAA2    | 21.43  | 1.96                    | frame           | HSA18 | 45.56 |
| 8 | TKY573   | 21.43  | 1.96                    | frame_identical | HSA18 | 44.1  |
| 8 | IER3IP1  | 29.99  | 2.61                    | placed          | HSA18 | 42.94 |
| 8 | COR003   | 43.43  | 0.11                    | placed          |       |       |
| 8 | CCDC5    | 47.7   | 1.96                    | frame           | HSA18 | 41.94 |
| 8 | ME2      | 61.15  | 2.14                    | frame           | HSA18 | 46.66 |
| 8 | TKY3255  | 69.34  | 3.81                    | placed          | HSA18 | 47.5  |
| 8 | MBD2     | 77.53  | 6.14                    | frame           | HSA18 | 49.93 |
| 8 | TKY961   | 98.54  | 1.89                    | placed          |       |       |
| 8 | NARS     | 119.41 | 2.09                    | placed          | HSA18 | 53.42 |
| 8 | UM033    | 119.41 | 2.09                    | placed          |       |       |
| 8 | ALPK2    | 123.34 | 5.95                    | frame           | HSA18 | 54.30 |
| 8 | TKY3280  | 131.26 | 2.2                     | placed          | HSA18 | 57.3  |
| 8 | COR056   | 147.76 | 1.89                    | frame           |       |       |
| 8 | 8STS01   | 160.06 | 2.23                    | frame           |       |       |
| 8 | SERPINB2 | 171.88 | 4.5                     | frame           | HSA18 | 59.71 |
| 8 | TKY468   | 182.86 | 3.81                    | frame           | HSA18 | 63.8  |
| 8 | CNDP2    | 205.72 | 4.25                    | frame           | HSA18 | 70.31 |
| 8 | CYB5A    | 209.25 | 1.97                    | placed          | HSA18 | 70.07 |
| 8 | TKY901   | 212.9  | 1.95                    | placed          |       |       |
| 8 | TKY894   | 236.76 | 2.18                    | placed          | HSA18 | 75.7  |
| 8 | ATP9B    | 240.18 | 1.14                    | frame           | HSA18 | 74.93 |
| 8 | GALR1    | 254.85 | 1.14                    | frame           | HSA18 | 73.09 |
| 8 | TKY932   | 258.63 | 1.51                    | placed          | HSA18 | 72.8  |

|   |         |        |                      |        |       |      |
|---|---------|--------|----------------------|--------|-------|------|
| 8 | TKY513  | 270.93 | 2.9                  | placed |       |      |
| 8 | UMNe526 | ---    | [ATP9B - q-terminal] | binned |       |      |
| 8 | TKY923  | ---    | [SMAD2 - CCDC5]      | binned |       |      |
| 8 | TKY409  | ---    | [CCDC5 - MBD2]       | binned |       |      |
| 8 | TKY1051 | ---    | [CCDC5 - MBD2]       | binned |       |      |
| 8 | TKY362  | ---    | [ACAA2 - ME2]        | binned | HSA18 | 42.1 |
| 8 | TKY359  | ---    | [ACAA2 - ME2]        | binned | HSA18 | 40.8 |
| 8 | 8CA001  | ---    | [MBD2 - COR056]      | binned | HSA18 | 57.3 |

| <b>Horse Chr.</b> | <b>Marker</b> | <b>Map Position (cR)</b> | <b>Placement LOD</b> | <b>Assignment</b> | <b>Human Chr.</b> | <b>Human Mb (Build 36.1)</b> |
|-------------------|---------------|--------------------------|----------------------|-------------------|-------------------|------------------------------|
| 9                 | UMNe322       | 0                        | 1.66                 | frame             |                   |                              |
| 9                 | HTG04         | 6.24                     | 1.61                 | placed            |                   |                              |
| 9                 | UMNe518       | 12.32                    | 1.66                 | frame             |                   |                              |
| 9                 | ATP6V0D2      | 28.11                    | 2.71                 | frame             | HSA8              | 87.18                        |
| 9                 | CA3           | 43.94                    | 3.16                 | frame             | HSA8              | 86.54                        |
| 9                 | TKY939        | 89.88                    | 2                    | frame             | HSA8              | 80.1                         |
| 9                 | TKY2231       | 101.5                    | 2                    | frame             | HSA8              | 80.1                         |
| 9                 | UMNe438       | 108.48                   | 0.16                 | placed            |                   |                              |
| 9                 | FABP5         | 115.24                   | 0.16                 | placed            | HSA8              | 82.36                        |
| 9                 | FABP4         | 118.52                   | 1.63                 | frame             | HSA8              | 82.55                        |
| 9                 | PKIA          | 133.01                   | 3.92                 | frame             | HSA8              | 79.59                        |
| 9                 | CRISPLD1      | 152.5                    | 5.57                 | frame             | HSA8              | 76.06                        |
| 9                 | GDAP1         | 172                      | 5.57                 | frame             | HSA8              | 75.43                        |
| 9                 | AHT104        | 179.25                   | 2.4                  | placed            |                   |                              |
| 9                 | RPL7          | 189.75                   | 5.75                 | frame             | HSA8              | 74.3                         |
| 9                 | TKY714        | 199.44                   | 0.39                 | placed            |                   |                              |
| 9                 | TKY2519       | 217.17                   | 5.75                 | frame             | HSA8              | 73.7                         |
| 9                 | TKY2459       | 220.68                   | 1.42                 | placed            | HSA8              | 74                           |
| 9                 | TRAM1         | 243.33                   | 6.28                 | frame             | HSA8              | 71.65                        |
| 9                 | TKY2874       | 246.72                   | 3.83                 | placed            | HSA8              | 71.4                         |
| 9                 | TKY457        | 253.71                   | 3.58                 | frame             | HSA8              | 69.9                         |
| 9                 | HMS03         | 264.91                   | 4.61                 | frame             | HSA8              | 69.7                         |
| 9                 | COPS5         | 277.5                    | 3.56                 | frame             | HSA8              | 68.12                        |
| 9                 | VHL126        | 294.44                   | 1.12                 | frame             |                   |                              |
| 9                 | COR008        | 310.09                   | 1.12                 | frame             | HSA8              | 67.4                         |
| 9                 | TKY529        | 317.33                   | 2.7                  | placed            | HSA8              | 64.6                         |
| 9                 | TKY878        | 324.79                   | 2.43                 | placed            |                   |                              |
| 9                 | TKY895        | 336.86                   | 0.31                 | placed            |                   |                              |
| 9                 | GGH           | 344.64                   | 2.44                 | frame             | HSA8              | 64.09                        |
| 9                 | TKY533        | 355.93                   | 2.46                 | frame             |                   |                              |
| 9                 | COR013        | 366.91                   | 0.83                 | placed            | HSA8              | 62.3                         |
| 9                 | CHD7          | 370.33                   | 2.89                 | frame             | HSA8              | 61.75                        |



|   |          |        |                      |        |      |        |
|---|----------|--------|----------------------|--------|------|--------|
| 9 | TKY2223  | 373.7  | 0.43                 | placed | HSA8 | 62.5   |
| 9 | NSMAF    | 408.03 | 4.12                 | frame  | HSA8 | 59.66  |
| 9 | TKY1010  | 420.91 | 0.38                 | placed |      |        |
| 9 | CHCHD7   | 437.54 | 1.12                 | placed | HSA8 | 57.29  |
| 9 | PENK     | 440.65 | 4.12                 | frame  | HSA8 | 57.52  |
| 9 | RPS20    | 446.59 | 2.03                 | placed | HSA8 | 57.15  |
| 9 | TKY291   | 461.62 | 5.79                 | frame  | HSA8 | 54.3   |
| 9 | LEX070   | 467.2  | 0.14                 | placed |      |        |
| 9 | HTG08    | 475.8  | 2.27                 | placed | HSA8 | 54.3   |
| 9 | TKY879   | 491.32 | 5.31                 | frame  | HSA8 | 53.4   |
| 9 | SNAI2    | 519.68 | 3.56                 | frame  | HSA8 | 49.99  |
| 9 | PRKDC    | 539.09 | 0.29                 | placed | HSA8 | 48.85  |
| 9 | MCM4     | 549.21 | 3.56                 | frame  | HSA8 | 49.04  |
| 9 | TKY676   | ---    | [UMNe518 - CA3]      | binned |      |        |
| 9 | UMNe540  | ---    | [SNAI2 - q-terminal] | binned |      |        |
| 9 | TKY627   | ---    | [VHL126 - GGH]       | binned | HSA8 | 65.6   |
| 9 | AHT096   | ---    | [CRISPLD1 - RPL7]    | binned | HSA8 | 75.5   |
| 9 | NBN      | 0      | 1.31                 | frame  | HSA8 | 91.01  |
| 9 | TKY1831  | 10.06  | 1.31                 | frame  | HSA8 | 91.8   |
| 9 | COR098   | 17.98  | 1.16                 | placed | HSA8 | 92.2   |
| 9 | UMNe123  | 23.05  | 3.47                 | frame  | HSA8 | 92.3   |
| 9 | UMNe204  | 33.18  | 0.11                 | placed |      |        |
| 9 | PPM2C    | 68.19  | 7.25                 | frame  | HSA8 | 95.00  |
| 9 | UMNe496  | 123    | 2.81                 | placed |      |        |
| 9 | COR093   | 168.12 | 8.47                 | frame  |      |        |
| 9 | UMNe580  | 191.61 | 0.75                 | placed |      |        |
| 9 | UQCRB    | 197.16 | 6.35                 | frame  | HSA8 | 97.31  |
| 9 | UM037    | 199.87 | 1.14                 | placed | HSA8 | 97.1   |
| 9 | TKY699   | 210.63 | 0.22                 | placed |      |        |
| 9 | UMNe155  | 230.42 | 4.74                 | placed | HSA8 | 99.1   |
| 9 | MTDH     | 236.04 | 3.02                 | frame  | HSA8 | 98.73  |
| 9 | TKY465   | 248.41 | 3.02                 | frame  | HSA8 | 99     |
| 9 | RNF19    | 275.6  | 2.71                 | frame  | HSA8 | 101.34 |
| 9 | UMNe103  | 284.48 | 2.55                 | placed |      |        |
| 9 | ANKRD46  | 287.31 | 2.46                 | frame  | HSA8 | 101.60 |
| 9 | TKY453   | 296.42 | 1.48                 | frame  | HSA8 | 101    |
| 9 | ZNF706   | 312.78 | 1.73                 | frame  | HSA8 | 102.28 |
| 9 | 9STS01   | 321.92 | 1.73                 | frame  |      |        |
| 9 | UMNe393  | 368.32 | 5.5                  | frame  |      |        |
| 9 | KLF10    | 405.45 | 1.09                 | placed | HSA8 | 103.73 |
| 9 | TKY2750  | 405.45 | 1.09                 | placed | HSA8 | 104.3  |
| 9 | TKY1138  | 429.39 | 1.02                 | frame  |      |        |
| 9 | ATP6V1C1 | 445.13 | 1.02                 | frame  | HSA8 | 104.10 |
| 9 | AZIN1    | 473.11 | 1.33                 | frame  | HSA8 | 103.91 |
| 9 | UMNe342  | 513.39 | 3.34                 | frame  | HSA8 | 106.8  |
| 9 | ABRA     | 523.99 | 1.26                 | frame  | HSA8 | 107.84 |
| 9 | TKY805   | 535.01 | 1.02                 | frame  | HSA8 | 108.2  |

|   |          |        |                      |        |      |        |
|---|----------|--------|----------------------|--------|------|--------|
| 9 | UMNe577  | 545.75 | 1.02                 | frame  | HSA8 | 108.2  |
| 9 | EIF3S6   | 556.42 | 3.44                 | placed | HSA8 | 109.28 |
| 9 | TRHR     | 559.98 | 7.84                 | frame  | HSA8 | 110.17 |
| 9 | RAD21    | 583.76 | 4.05                 | frame  | HSA8 | 117.93 |
| 9 | NOV      | 587.39 | 2.41                 | placed | HSA8 | 120.50 |
| 9 | EXT1     | 594.66 | 2.35                 | frame  | HSA8 | 118.88 |
| 9 | TKY2751  | 605.33 | 2.35                 | frame  | HSA8 | 121.7  |
| 9 | TKY293   | 616.36 | 0.22                 | placed | HSA8 | 114.4  |
| 9 | MYC      | 632.09 | 3.73                 | frame  | HSA8 | 128.82 |
| 9 | KIAA0196 | 639.62 | 2.05                 | placed | HSA8 | 126.11 |
| 9 | UMNe507  | 647.15 | 4.28                 | placed | HSA8 | 128.6  |
| 9 | TKY505   | 658.56 | 1.07                 | placed | HSA8 | 131.8  |
| 9 | ASB05    | 665.84 | 6.31                 | frame  | HSA8 | 131.5  |
| 9 | UMNe212  | 676.44 | 2.49                 | placed | HSA8 | 133.5  |
| 9 | TG       | 679.85 | 4.54                 | frame  | HSA8 | 133.95 |
| 9 | VHL219   | 690.19 | 4.54                 | frame  |      |        |
| 9 | LEX019   | 707.54 | 2.09                 | placed |      |        |
| 9 | TKY540   | 724.88 | 4.24                 | frame  |      |        |
| 9 | CHRA1    | 738.64 | 4.24                 | frame  | HSA8 | 141.59 |
| 9 | LY6H     | 752.09 | 6.49                 | frame  | HSA8 | 144.31 |
| 9 | SCRIB    | 765.93 | 3.29                 | frame  | HSA8 | 144.95 |
| 9 | LRRC14   | 776.6  | 1.52                 | placed | HSA8 | 145.71 |
| 9 | RPL8     | 783.7  | 3.29                 | frame  | HSA8 | 145.99 |
| 9 | TKY916   | 805.73 | 5.04                 | placed | HSA8 | 114.9  |
| 9 | AHT053   | ---    | [ABRA -<br>TRHR]     | binned |      |        |
| 9 | TKY1884  | ---    | [AZIN1 -<br>ABRA]    | binned | HSA8 | 106.8  |
| 9 | NUDCD1   | ---    | [UMNe577 -<br>RAD21] | binned | HSA8 | 110.32 |
| 9 | ASB21    | ---    | [VHL219 -<br>CHRA1]  | binned | HSA8 | 139.4  |
| 9 | UMNe189  | ---    | [TKY2751 -<br>ASB05] | binned |      |        |
| 9 | UMNe493  | ---    | [TRHR -<br>EXT1]     | binned | HSA8 | 123.4  |
| 9 | TKY452   | ---    | [TRHR -<br>MYC]      | binned |      |        |

| Horse<br>Chr. | Marker  | Map<br>Position<br>(cR) | Placement<br>LOD | Assignment | Human<br>Chr. | Human<br>Mb<br>(Build<br>36.1) |
|---------------|---------|-------------------------|------------------|------------|---------------|--------------------------------|
| 10            | AHT049  | 0                       | 2.48             | frame      | HSA19         | 33.3                           |
| 10            | POP4    | 6.82                    | 3.41             | placed     | HSA19         | 34.79                          |
| 10            | TKY1765 | 17.12                   | 0.11             | placed     | HSA19         | 35.4                           |
| 10            | C19orf2 | 20.54                   | 2.48             | frame      | HSA19         | 35.13                          |
| 10            | ZNF536  | 28.08                   | 2.68             | placed     | HSA19         | 35.56                          |
| 10            | HMS23   | 31.84                   | 4.69             | frame      | HSA19         | 36.3                           |
| 10            | TKY580  | 39.37                   | 2.59             | placed     |               |                                |
| 10            | PDCD5   | 43.28                   | 3.46             | frame      | HSA19         | 37.76                          |

|    |          |        |      |                 |       |       |
|----|----------|--------|------|-----------------|-------|-------|
| 10 | NUDT19   | 63.05  | 1.54 | placed          | HSA19 | 37.87 |
| 10 | CEBPG    | 88     | 4.57 | frame           | HSA19 | 38.56 |
| 10 | SLC7A10  | 88     | 4.57 | frame_identical | HSA19 | 38.39 |
| 10 | GPI      | 96.14  | 2.67 | placed          | HSA19 | 39.55 |
| 10 | PSENN    | 104.28 | 2.37 | frame           | HSA19 | 40.93 |
| 10 | TKY023   | 117.02 | 2.37 | frame           |       |       |
| 10 | CAPNS1   | 130.36 | 4.02 | frame           | HSA19 | 41.32 |
| 10 | TKY855   | 166.36 | 0.26 | placed          |       |       |
| 10 | UMNe506  | 184.25 | 4.34 | frame           |       |       |
| 10 | HKR1     | 189.44 | 2.32 | placed          | HSA19 | 42.52 |
| 10 | TKY601   | 200.5  | 0.25 | placed          | HSA19 | 41.7  |
| 10 | COR020   | 216.12 | 2.6  | placed          |       |       |
| 10 | COR045   | 216.12 | 2.59 | placed          |       |       |
| 10 | MRPS12   | 220.81 | 4.34 | frame           | HSA19 | 44.11 |
| 10 | TKY365   | 234.81 | 4.02 | frame           | HSA19 | 45.5  |
| 10 | UCDEQ482 | 234.81 | 4.02 | frame_identical |       |       |
| 10 | BCKDHA   | 252.61 | 4.02 | frame           | HSA19 | 46.60 |
| 10 | COR048   | 252.61 | 4.02 | frame_identical |       |       |
| 10 | LIPE     | 285.65 | 3.4  | frame           | HSA19 | 47.60 |
| 10 | AHT015   | 289.74 | 0.15 | placed          |       |       |
| 10 | POU2F2   | 309.44 | 3.4  | frame           | HSA19 | 47.28 |
| 10 | ETHE1    | 342.82 | 6.16 | frame           | HSA19 | 48.70 |
| 10 | ASB06    | 360.62 | 3.29 | placed          | HSA19 | 48.6  |
| 10 | NVHEQ018 | 385.15 | 2.29 | placed          |       |       |
| 10 | CLPTM1   | 388.67 | 2.09 | frame           | HSA19 | 50.15 |
| 10 | CKM      | 399.23 | 2.09 | frame           | HSA19 | 50.50 |
| 10 | RPS17ps  | 410.16 | 2.43 | placed          |       |       |
| 10 | STRN4    | 413.92 | 6.06 | frame           | HSA19 | 51.91 |
| 10 | KPTN     | 436.2  | 0.11 | placed          | HSA19 | 52.66 |
| 10 | C5AR1    | 440.64 | 1.92 | frame           | HSA19 | 52.50 |
| 10 | TKY773   | 440.64 | 1.92 | frame_identical | HSA19 | 52.6  |
| 10 | GLTSCR1  | 453.97 | 1.92 | frame           | HSA19 | 52.87 |
| 10 | GYS1     | 466.72 | 2.4  | placed          | HSA19 | 54.16 |
| 10 | ELSPBP1  | 466.72 | 2.4  | placed          | HSA19 | 53.19 |
| 10 | FTL      | 470.78 | 4.08 | frame           | HSA19 | 54.16 |
| 10 | RPL13A   | 487.09 | 3.68 | frame           | HSA19 | 54.68 |
| 10 | NKG7     | 498.83 | 3.68 | frame           | HSA19 | 56.57 |
| 10 | LEX008   | 502.6  | 0.36 | placed          |       |       |
| 10 | TKY537   | 514.81 | 4.45 | placed          |       |       |
| 10 | TKY918   | 546.1  | 0.31 | placed          |       |       |
| 10 | RPL28    | 562.41 | 4.07 | frame           | HSA19 | 60.59 |
| 10 | TKY1034  | 562.41 | 4.07 | frame_identical |       |       |
| 10 | COR083   | 566.32 | 0.22 | placed          |       |       |
| 10 | UM028    | 585.94 | 0.26 | placed          |       |       |
| 10 | LILRA5   | 589.34 | 2.82 | frame           | HSA19 | 59.51 |
| 10 | SGCV20   | 599.34 | 1.8  | placed          |       |       |
| 10 | MYADM    | 605.81 | 2.82 | frame           | HSA19 | 59.06 |
| 10 | 10STS01  | 636.6  | 3.79 | frame           |       |       |
| 10 | AURKC    | 700.32 | 2.38 | placed          | HSA19 | 62.43 |
| 10 | UCDEQ412 | 714.11 | 1.25 | placed          |       |       |

|    |                  |        |                        |                 |       |       |
|----|------------------|--------|------------------------|-----------------|-------|-------|
| 10 | PEG3             | 717.53 | 5.77                   | frame           | HSA19 | 62.02 |
| 10 | LEX062/066       | 734.67 | 5.77                   | frame           |       |       |
| 10 | 10STS03          | 750.45 | 0.13                   | placed          |       |       |
| 10 | RPS5             | 753.24 | 5.02                   | frame           | HSA19 | 63.59 |
| 10 | TKY460           | 778.72 | 5.02                   | frame           |       |       |
| 10 | SLC7A9           | ---    | [PDCD5 - PSENEN]       | binned          | HSA19 | 38.01 |
| 10 | TSHZ3            | ---    | [C19orf2 - PDCD5]      | binned          | HSA19 | 36.46 |
| 10 | TGFB1            | ---    | [TKY365 - LIPE]        | binned          | HSA19 | 46.53 |
| 10 | RPS19            | ---    | [LIPE - ETHE1]         | binned          | HSA19 | 47.06 |
| 10 | ZNF543           | ---    | [10STS01 - LEX062/066] | binned          | HSA19 | 62.52 |
| 10 | PPP5C            | ---    | [CKM - C5AR1]          | binned          | HSA19 | 51.54 |
| 10 | TKY592           | ---    | [STRN4 - GLTSCR1]      | binned          |       |       |
| 10 | NUP62            | ---    | [STRN4 - GLTSCR1]      | binned          | HSA19 | 55.10 |
| 10 | NOSIP            | ---    | [STRN4 - GLTSCR1]      | binned          | HSA19 | 54.75 |
| 10 | SGCV30           | ---    | [STRN4 - GLTSCR1]      | binned          |       |       |
| 10 | COR015           | ---    | [FTL - TKY1034]        | binned          | HSA19 | 55.3  |
| 10 | LILRA@           | ---    | [LILRA5 - 10STS01]     | binned          | HSA19 | 59.5  |
| 10 | KIR3DL@          | ---    | [TKY1034 - MYADM]      | binned          | HSA19 | 59.9  |
| 10 | HTR1B            | 0      | 1.45                   | frame           | HSA6  | 78.23 |
| 10 | PHIP             | 10.53  | 2.37                   | placed          | HSA6  | 79.71 |
| 10 | ELOVL4           | 14.03  | 1.45                   | frame           | HSA6  | 80.68 |
| 10 | TKY838           | 17.65  | 0.15                   | placed          | HSA6  | 79.5  |
| 10 | IBTK             | 25.53  | 1.1                    | placed          | HSA6  | 82.94 |
| 10 | NVHEQ007         | 38.29  | 2.02                   | placed          | HSA6  | 83.2  |
| 10 | UMNe267          | 46.74  | 2.95                   | frame           | HSA6  | 85.4  |
| 10 | ME1              | 46.74  | 2.95                   | frame_identical | HSA6  | 83.98 |
| 10 | CGA              | 64.56  | 2.41                   | placed          | HSA6  | 87.85 |
| 10 | CNR1             | 68.47  | 4.03                   | frame           | HSA6  | 88.91 |
| 10 | TKY2521          | 68.47  | 4.03                   | frame_identical | HSA6  | 88.8  |
| 10 | PNRC1            | 80.17  | 4.03                   | frame           | HSA6  | 89.85 |
| 10 | TKY867           | 97.11  | 2.41                   | frame           | HSA6  | 89.6  |
| 10 | CASP8AP2         | 110.38 | 2.41                   | frame           | HSA6  | 90.60 |
| 10 | UMNe372          | 122.55 | 2.31                   | frame           |       |       |
| 10 | UMNe209          | 134.24 | 4.43                   | frame           | HSA6  | 91    |
| 10 | MAP3K7           | 151.18 | 2.19                   | frame           | HSA6  | 91.28 |
| 10 | CH241-101G24_T7  | 174.45 | 2.28                   | placed          | HSA6  | 93.6  |
| 10 | EPHA7            | 178.68 | 4.59                   | frame           | HSA6  | 94.01 |
| 10 | UMNe426          | 178.68 | 4.59                   | frame_identical | HSA6  | 94.3  |
| 10 | CH241-101F16_T7  | 178.68 | 4.59                   | frame_identical | HSA6  | 94    |
| 10 | CH241-102A14_SP6 | 183.08 | 2.23                   | placed          | HSA6  | 94.8  |
| 10 | MANEA            | 191.96 | 1.9                    | frame           | HSA6  | 96.13 |

|    |                  |        |      |                 |      |        |
|----|------------------|--------|------|-----------------|------|--------|
| 10 | FHL5             | 195.88 | 1.59 | placed          | HSA6 | 97.12  |
| 10 | CH241-101M4_T7   | 214.44 | 1.9  | frame           | HSA6 | 97.6   |
| 10 | TKY1050          | 233.14 | 2.4  | placed          |      |        |
| 10 | FBXL4            | 237.03 | 2.9  | frame           | HSA6 | 99.43  |
| 10 | CH241-102D7_SP6  | 248.73 | 6.12 | frame           | HSA6 | 101.2  |
| 10 | UM040            | 248.73 | 6.12 | frame_identical |      |        |
| 10 | 10STS02          | 263.27 | 6.26 | frame           |      |        |
| 10 | PREP             | 289.77 | 4.43 | frame           | HSA6 | 105.83 |
| 10 | UMNe265          | 297.28 | 2.71 | placed          | HSA6 | 106    |
| 10 | PRDM1            | 297.28 | 2.71 | placed          | HSA6 | 106.64 |
| 10 | POPDC3           | 301.02 | 4.43 | frame           | HSA6 | 105.71 |
| 10 | AHT126           | 304.64 | 2.73 | placed          |      |        |
| 10 | AHT132           | 308.26 | 2.42 | placed          |      |        |
| 10 | ASB09            | 312.01 | 4.5  | frame           | HSA6 | 105    |
| 10 | UMNe543          | 336.46 | 0.55 | placed          |      |        |
| 10 | NR2E1            | 372.14 | 2.03 | frame           | HSA6 | 108.59 |
| 10 | TKY471           | 380.59 | 0.24 | placed          | HSA6 | 108.9  |
| 10 | TKY751           | 380.59 | 0.24 | placed          | HSA6 | 108.5  |
| 10 | AMD1             | 384.64 | 2.03 | frame           | HSA6 | 111.30 |
| 10 | SEC63            | 388.71 | 1.05 | placed          | HSA6 | 108.30 |
| 10 | SGCV17           | 388.71 | 2.43 | placed          | HSA6 | 108.2  |
| 10 | TKY1995          | 392.63 | 2.37 | placed          | HSA6 | 108.2  |
| 10 | CD164            | 400.13 | 3.64 | frame           | HSA6 | 109.79 |
| 10 | TKY964           | 432.86 | 4.4  | frame           | HSA6 | 113    |
| 10 | CH241-100J10_T7  | 453.2  | 2.4  | placed          | HSA6 | 113.3  |
| 10 | FYN              | 465.96 | 0.22 | placed          | HSA6 | 112.09 |
| 10 | WISP3            | 470.03 | 2    | frame           | HSA6 | 112.48 |
| 10 | LEX009           | 482.27 | 2    | frame           | HSA6 | 113.1  |
| 10 | HDAC2            | 504.72 | 1.02 | placed          | HSA6 | 114.37 |
| 10 | CH241-100C6_SP6  | 513.61 | 5.52 | frame           | HSA6 | 114.7  |
| 10 | TKY2859          | 526.37 | 2.87 | placed          | HSA6 | 114.4  |
| 10 | COL10A1          | 549.74 | 1.63 | frame           | HSA6 | 116.54 |
| 10 | TKY496           | 566.77 | 0.31 | placed          | HSA6 | 117.6  |
| 10 | ROS1             | 577.36 | 1.63 | frame           | HSA6 | 117.72 |
| 10 | MAN1A1           | 613.1  | 3.66 | frame           | HSA6 | 119.54 |
| 10 | GJA1             | 631.94 | 2.4  | frame           | HSA6 | 121.80 |
| 10 | CH241-101E16_T7  | 635.45 | 2.52 | placed          | HSA6 | 121.8  |
| 10 | SMPDL3A          | 642.69 | 2.4  | frame           | HSA6 | 123.15 |
| 10 | HSF2             | 642.69 | 2.4  | frame_identical | HSA6 | 122.76 |
| 10 | CH241-100E2_SP6  | 646.44 | 1.26 | placed          | HSA6 | 122.7  |
| 10 | PKIB             | 657.78 | 2.48 | frame           | HSA6 | 122.83 |
| 10 | NVHEQ067         | 681.29 | 2.52 | placed          |      |        |
| 10 | HEY2             | 692.56 | 2.41 | placed          | HSA6 | 126.11 |
| 10 | CH241-100D21_SP6 | 696.06 | 5.93 | frame           | HSA6 | 126.4  |
| 10 | COR085           | 702.85 | 2.6  | placed          | HSA6 | 127    |

|    |                  |        |                            |                 |      |        |
|----|------------------|--------|----------------------------|-----------------|------|--------|
| 10 | TKY503           | 702.85 | 2.6                        | placed          | HSA6 | 126.6  |
| 10 | RNF146           | 706.15 | 5.93                       | frame           | HSA6 | 127.63 |
| 10 | LAMA2            | 723.78 | 4.08                       | frame           | HSA6 | 129.25 |
| 10 | ARG1             | 733.42 | 4.08                       | frame           | HSA6 | 131.94 |
| 10 | PEX7             | 757.48 | 1.33                       | placed          | HSA6 | 137.19 |
| 10 | HBS1L            | 764.08 | 3.99                       | placed          | HSA6 | 135.32 |
| 10 | SGK              | 777.72 | 3.03                       | frame           | HSA6 | 134.53 |
| 10 | TKY632           | 794.82 | 0.61                       | placed          |      |        |
| 10 | REPS1            | 801.42 | 3.03                       | frame           | HSA6 | 139.27 |
| 10 | TKY2470          | 801.42 | 3.03                       | frame_identical | HSA6 | 139.1  |
| 10 | AHT086           | 848.74 | 1.99                       | placed          | HSA6 | 130.6  |
| 10 | TKY689           | ---    | [HTR1B - ME1]              | binned          | HSA6 | 79.4   |
| 10 | PGM3             | ---    | [ELOVL4 - CNR1]            | binned          | HSA6 | 83.94  |
| 10 | CH241-100N24_SP6 | ---    | [EPHA7 - CH241-101M4_T7]   | binned          | HSA6 | 96.1   |
| 10 | TKY614           | ---    | [FBXL4 - 10STS02]          | binned          |      |        |
| 10 | CH241-101L6_SP6  | ---    | [POPDC3 - NR2E1]           | binned          | HSA6 | 105.2  |
| 10 | TKY1101          | ---    | [PREP - ASB09]             | binned          | HSA6 | 106.6  |
| 10 | TKY722           | ---    | [CH241-100D21_SP6 - LAMA2] | binned          |      |        |
| 10 | TKY999           | ---    | [NR2E1 - CD164]            | binned          | HSA6 | 109.9  |
| 10 | CH241-102D24_SP6 | ---    | [NR2E1 - CD164]            | binned          | HSA6 | 110.1  |
| 10 | REV3L            | ---    | [NR2E1 - CD164]            | binned          | HSA6 | 111.73 |

| Horse Chr. | Marker          | Map Position (cR) | Placement LOD | Assignment      | Human Chr. | Human Mb (Build 36.1) |
|------------|-----------------|-------------------|---------------|-----------------|------------|-----------------------|
| 11         | SGCV22          | 0                 | 6.89          | frame           |            |                       |
| 11         | FASN            | 27.57             | 2.71          | frame           | HSA17      | 77.63                 |
| 11         | UMNe365         | 37.88             | 2.71          | frame           |            |                       |
| 11         | TKY551          | 37.88             | 2.71          | frame_identical |            |                       |
| 11         | PDE6G           | 40.4              | 0.15          | placed          | HSA17      | 77.23                 |
| 11         | P4HB            | 45.54             | 3.03          | frame           | HSA17      | 77.39                 |
| 11         | TKY646          | 78.8              | 9.47          | frame           | HSA17      | 75                    |
| 11         | AHT044          | 140.43            | 2.72          | frame           |            |                       |
| 11         | UMNe096         | 149.55            | 1.53          | placed          |            |                       |
| 11         | AHT016          | 158.66            | 2.95          | placed          |            |                       |
| 11         | UMNe128         | 171.87            | 0.12          | placed          |            |                       |
| 11         | UMNe085         | 175.84            | 2.12          | frame           |            |                       |
| 11         | AHT128          | 179.82            | 2.83          | placed          |            |                       |
| 11         | VHL060          | 187.84            | 2.12          | frame           |            |                       |
| 11         | VHL78           | 234.64            | 0.15          | placed          |            |                       |
| 11         | CH241-103P20_T7 | 237.5             | 1.99          | frame           |            |                       |
| 11         | UMNe398         | 298.17            | 6.1           | frame           |            |                       |
| 11         | UMNe514         | 330.96            | 6.1           | frame           |            |                       |

|    |                      |         |      |        |       |       |
|----|----------------------|---------|------|--------|-------|-------|
| 11 | 11STS02              | 387.13  | 0.26 | placed |       |       |
| 11 | UMNe423              | 395.83  | 5.91 | frame  |       |       |
| 11 | TKY908               | 520.58  | 3.48 | frame  |       |       |
| 11 | ACOX1                | 541.34  | 3.48 | frame  | HSA17 | 71.45 |
| 11 | GALR2                | 544.14  | 0.18 | placed | HSA17 | 71.58 |
| 11 | CDR2L                | 555.61  | 8.03 | frame  | HSA17 | 70.50 |
| 11 | TKY1312              | 569.14  | 2.47 | placed | HSA17 | 69.5  |
| 11 | UMNe314              | 569.14  | 2.47 | placed |       |       |
| 11 | UCDEQ039             | 571.6   | 5.15 | frame  |       |       |
| 11 | CD300C               | 581.75  | 5.15 | frame  | HSA17 | 70.05 |
| 11 | UCDEQ439             | 599.81  | 3.78 | frame  |       |       |
| 11 | TKY960               | 628.59  | 3.78 | frame  | HSA17 | 68.3  |
| 11 | SOX9                 | 672.13  | 4.47 | frame  | HSA17 | 67.63 |
| 11 | NVHEQ040             | 688.92  | 4.47 | frame  | HSA17 | 67.7  |
| 11 | UMNe116              | 703.24  | 2.03 | frame  | HSA17 | 66.1  |
| 11 | TKY2455              | 705.47  | 1.12 | placed | HSA17 | 65.7  |
| 11 | LEX068               | 728.93  | 2.03 | frame  |       |       |
| 11 | UMNe240              | 775.62  | 6.62 | frame  | HSA17 | 64.6  |
| 11 | NOL11                | 836.19  | 3.42 | frame  | HSA17 | 63.14 |
| 11 | DDX5                 | 854.11  | 3.42 | frame  | HSA17 | 59.93 |
| 11 | PSMC5                | 863.89  | 1.26 | frame  | HSA17 | 59.26 |
| 11 | ACE                  | 868.65  | 0.64 | placed | HSA17 | 58.91 |
| 11 | SCN4A                | 873.5   | 1.26 | frame  | HSA17 | 59.37 |
| 11 | CH241-<br>100B11_SP6 | 891.22  | 6.66 | frame  |       |       |
| 11 | MYL4                 | 900.69  | 6.66 | frame  | HSA17 | 42.64 |
| 11 | TKY2446              | 910.31  | 4.25 | frame  | HSA17 | 41.2  |
| 11 | NSF                  | 922.55  | 4.25 | frame  | HSA17 | 41.81 |
| 11 | UMNe378              | 962.54  | 1.33 | frame  | HSA17 | 38.3  |
| 11 | ITGA2B               | 972.57  | 1.07 | placed | HSA17 | 39.81 |
| 11 | CH241-<br>101A18_SP6 | 977.37  | 1.33 | frame  |       |       |
| 11 | D-8                  | 987.5   | 1.18 | frame  |       |       |
| 11 | SGCV24               | 995.4   | 1.16 | placed | HSA17 | 39.2  |
| 11 | TKY954               | 997.99  | 0.91 | placed | HSA17 | 39.2  |
| 11 | BRCA1                | 1003.04 | 1.18 | frame  | HSA17 | 38.45 |
| 11 | AARSD1               | 1016.56 | 4.89 | frame  | HSA17 | 38.36 |
| 11 | TKY2674              | 1036.47 | 6.55 | frame  | HSA17 | 37.4  |
| 11 | MLX                  | 1044.08 | 3.85 | frame  | HSA17 | 37.97 |
| 11 | GAST                 | 1051.28 | 3.85 | frame  | HSA17 | 37.12 |
| 11 | CH241-<br>102M09_SP6 | 1063.39 | 8.38 | frame  |       |       |
| 11 | AHT076               | 1070.54 | 2.52 | placed | HSA17 | 36.1  |
| 11 | UMNe259              | 1072.9  | 4.64 | frame  | HSA17 | 36.1  |
| 11 | TKY978               | 1089.01 | 4.64 | frame  |       |       |
| 11 | CSF3                 | 1116.9  | 4.75 | frame  | HSA17 | 35.43 |
| 11 | PNMT                 | 1134.32 | 2.04 | frame  | HSA17 | 35.08 |
| 11 | CACNB1               | 1141.36 | 2.04 | frame  | HSA17 | 34.58 |
| 11 | CH241-<br>102B10_SP6 | 1155.67 | 4.01 | frame  |       |       |
| 11 | TKY2944              | 1170.01 | 4.01 | frame  | HSA17 | 43.7  |

|    |          |         |                                   |                 |       |       |
|----|----------|---------|-----------------------------------|-----------------|-------|-------|
| 11 | UMNe558  | 1198.13 | 5.42                              | frame           | HSA17 | 44.9  |
| 11 | TKY304   | 1217.62 | 0.67                              | frame           | HSA17 | 45.6  |
| 11 | COL1A1   | 1229.49 | 2.48                              | frame           | HSA17 | 45.62 |
| 11 | TKY988   | 1236.53 | 2.48                              | frame           | HSA17 | 46    |
| 11 | SGCV13   | 1241.18 | 1.31                              | placed          | HSA17 | 45.9  |
| 11 | TKY1028  | 1245.87 | 2.69                              | frame           |       |       |
| 11 | UMNe201  | 1280.35 | 8.51                              | frame           | HSA17 | 48.2  |
| 11 | HLF      | 1305.65 | 0.47                              | placed          | HSA17 | 50.70 |
| 11 | MMD      | 1307.97 | 1.26                              | frame           | HSA17 | 50.82 |
| 11 | TKY1004  | 1315.24 | 1.26                              | frame           | HSA17 | 51.2  |
| 11 | TKY490   | 1325.1  | 1.09                              | frame           |       |       |
| 11 | EPX      | 1358    | 4.14                              | frame           | HSA17 | 53.63 |
| 11 | MKS1     | 1370.55 | 4.14                              | frame           | HSA17 | 53.64 |
| 11 | TMEM49   | 1383.7  | 3.46                              | frame           | HSA17 | 55.14 |
| 11 | TKY710   | 1394.49 | 1.29                              | placed          |       |       |
| 11 | THRAP1   | 1397.07 | 1.06                              | frame           | HSA17 | 57.38 |
| 11 | TKY3518  | 1402.17 | 1.21                              | placed          | HSA17 | 56.9  |
| 11 | TKY3493  | 1412.47 | 1.06                              | frame           | HSA17 | 56.5  |
| 11 | TKY343   | ---     | [LEX068 -<br>NOL11]               | binned          |       |       |
| 11 | TKY630   | ---     | [CDR2L -<br>CD300C]               | binned          |       |       |
| 11 | SGCA     | ---     | [TKY304 -<br>TKY988]              | binned          | HSA17 | 45.60 |
| 11 | TKY3288  | ---     | [CACNB1 -<br>TKY2944]             | binned          | HSA17 | 43.1  |
| 11 | GH1      | ---     | [PSMC5 -<br>CH241-<br>100B11_SP6] | binned          | HSA17 | 59.35 |
| 11 | USP32    | 0       | 1.12                              | frame           | HSA17 | 55.61 |
| 11 | CA4      | 3.54    | 2.28                              | placed          | HSA17 | 55.58 |
| 11 | ACACA    | 25.54   | 1.12                              | frame           | HSA17 | 32.52 |
| 11 | ASB35    | 32.2    | 1.79                              | placed          | HSA17 | 32.6  |
| 11 | TKY033   | 61.06   | 1.72                              | frame           | HSA17 | 33.1  |
| 11 | TKY032   | 61.06   | 1.72                              | frame_identical | HSA17 | 33.1  |
| 11 | NVHEQ090 | 69.55   | 2.38                              | placed          |       |       |
| 11 | AP2B1    | 78.05   | 2.2                               | placed          | HSA17 | 30.94 |
| 11 | LIG3     | 85.87   | 4                                 | frame           | HSA17 | 30.33 |
| 11 | UMNe143  | 93.41   | 2.46                              | placed          |       |       |
| 11 | CCL2     | 104.73  | 2.89                              | frame           | HSA17 | 29.61 |
| 11 | 11STS01  | 116.94  | 2.89                              | frame           |       |       |
| 11 | TKY648   | 134.86  | 1.26                              | frame           |       |       |
| 11 | TKY906   | 148.84  | 1.26                              | frame           | HSA17 | 29    |
| 11 | TKY010   | 162.17  | 2.34                              | frame           |       |       |
| 11 | EVI2A    | 174.91  | 0.62                              | placed          | HSA17 | 26.67 |
| 11 | ZNF207   | 178.97  | 2.35                              | frame           | HSA17 | 27.70 |
| 11 | TKY424   | 186.51  | 1.61                              | placed          |       |       |
| 11 | NF1      | 186.51  | 0.88                              | placed          | HSA17 | 26.45 |
| 11 | WSB1     | ---     | [TKY010 - q-<br>terminal]         | binned          | HSA17 | 22.65 |
| 11 | OMG      | ---     | [TKY010 - q-                      | binned          | HSA17 | 26.65 |



|    |                     |        |                                        |        |       |       |
|----|---------------------|--------|----------------------------------------|--------|-------|-------|
| 11 | LGALS9              | ---    | terminal]<br>[TKY010 - q-<br>terminal] | binned | HSA17 | 22.98 |
| 11 | GEMIN4              | 0      | 0.82                                   | frame  | HSA17 | 0.59  |
| 11 | TIMM22              | 26.02  | 0.82                                   | frame  | HSA17 | 0.85  |
| 11 | SKIP                | 45.66  | 2.14                                   | placed | HSA17 | 1.34  |
| 11 | TKY626              | 58.83  | 2.7                                    | frame  |       |       |
| 11 | TKY276              | 78.47  | 3.52                                   | placed | HSA17 | 3.4   |
| 11 | CHRNE               | 104.62 | 0.34                                   | placed | HSA17 | 4.74  |
| 11 | GUCY2D              | 125.95 | 0.49                                   | placed | HSA17 | 7.85  |
| 11 | CXCL16              | 125.95 | 0.49                                   | placed | HSA17 | 4.58  |
| 11 | ENO3                | 133.18 | 2.55                                   | frame  | HSA17 | 4.80  |
| 11 | CH241-<br>101K01_T7 | ---    | [GEMIN4 -<br>TKY626]                   | binned |       |       |
| 11 | HTG26               | ---    | [TKY626 - q-<br>terminal]              | binned |       |       |
| 11 | BIRC4BP             | ---    | [TKY626 - q-<br>terminal]              | binned | HSA17 | 6.60  |
| 11 | MYH4                | 0      | 1.82                                   | frame  | HSA17 | 10.29 |
| 11 | MYH3                | 27.04  | 1.82                                   | frame  | HSA17 | 10.47 |
| 11 | RCVRN               | 42.17  | 2.18                                   | placed | HSA17 | 9.74  |
| 11 | HLM2                | 47.24  | 1.1                                    | frame  |       |       |
| 11 | ELAC2               | 77.5   | 1.29                                   | frame  | HSA17 | 12.84 |
| 11 | UMNe443             | 95.73  | 1.29                                   | frame  | HSA17 | 11.28 |
| 11 | AHT125              | ---    | [MYH3 -<br>ELAC2]                      | binned |       |       |

| Horse<br>Chr. | Marker          | Map<br>Position<br>(cR) | Placement<br>LOD | Assignment      | Human<br>Chr. | Human<br>Mb<br>(Build<br>36.1) |
|---------------|-----------------|-------------------------|------------------|-----------------|---------------|--------------------------------|
| 12            | FBXO3           | 0                       | 5.43             | frame           | HSA11         | 33.72                          |
| 12            | CD44            | 22.4                    | 5.43             | frame           | HSA11         | 35.12                          |
| 12            | UMNe109         | 39.88                   | 2.2              | placed          | HSA11         | 37.1                           |
| 12            | TRAF6           | 46.6                    | 1.08             | placed          | HSA11         | 36.47                          |
| 12            | RAG2            | 49.93                   | 3.38             | frame           | HSA11         | 36.57                          |
| 12            | TKY683          | 49.93                   | 3.38             | frame_identical | HSA11         | 37.1                           |
| 12            | RAG1            | 49.93                   | 3.38             | frame_identical | HSA11         | 36.55                          |
| 12            | UMNe165/193/260 | 49.93                   | 3.38             | frame_identical | HSA11         | 37                             |
| 12            | UMNe469         | 67.28                   | 3.38             | frame           |               |                                |
| 12            | TKY286          | 85.2                    | 2.41             | placed          |               |                                |
| 12            | UMNe223         | 88.64                   | 2.01             | frame           |               |                                |
| 12            | UMNe329         | 95.52                   | 0.39             | placed          |               |                                |
| 12            | AHT056          | 98.89                   | 2.01             | frame           |               |                                |
| 12            | TKY823          | 109.71                  | 0.34             | placed          |               |                                |
| 12            | TKY734          | 130.42                  | 0.14             | placed          | HSA11         | 45.2                           |
| 12            | SGCV10          | 138.33                  | 9.08             | frame           | HSA11         | 44.6                           |
| 12            | AHT027          | 158.23                  | 5.48             | frame           | HSA11         | 45.8                           |
| 12            | UMNe191         | 176.12                  | 1.67             | frame           | HSA11         | 46.2                           |
| 12            | MADD            | 189.55                  | 1.67             | frame           | HSA11         | 47.25                          |

|    |          |        |                      |                 |       |       |
|----|----------|--------|----------------------|-----------------|-------|-------|
| 12 | TKY769   | 224.47 | 5.84                 | frame           |       |       |
| 12 | RKJ12    | ---    | [AHT056 -<br>AHT027] | binned          |       |       |
| 12 | CNTF     | 0      | 5.55                 | frame           | HSA11 | 58.15 |
| 12 | UMNe331  | 22.99  | 1.67                 | frame           |       |       |
| 12 | TKY1143  | 30.82  | 1.67                 | frame           | HSA11 | 58.9  |
| 12 | TKY404   | 61.35  | 5                    | frame           |       |       |
| 12 | MS4A1    | 64.13  | 0.23                 | placed          | HSA11 | 59.98 |
| 12 | SGCV08   | 72.6   | 0.14                 | placed          |       |       |
| 12 | TKY1075  | 72.6   | 0.13                 | placed          | HSA11 | 61.1  |
| 12 | UMNe391  | 77.99  | 3.04                 | frame           | HSA11 | 61.1  |
| 12 | TKY482   | 97.35  | 2.7                  | frame           |       |       |
| 12 | SCGB1A1  | 113.66 | 2.7                  | frame           | HSA11 | 61.94 |
| 12 | EEF1G    | 121.57 | 3.05                 | frame           | HSA11 | 62.08 |
| 12 | ROM1     | 121.57 | 3.05                 | frame_identical | HSA11 | 62.14 |
| 12 | B3GAT3   | 124.15 | 0.29                 | placed          | HSA11 | 62.14 |
| 12 | HRASLS3  | 144.17 | 9.54                 | frame           | HSA11 | 63.10 |
| 12 | COR030   | 158.05 | 2.09                 | placed          |       |       |
| 12 | PYGM     | 160.65 | 6.74                 | frame           | HSA11 | 64.27 |
| 12 | LRFN4    | 185.65 | 2.13                 | frame           | HSA11 | 66.38 |
| 12 | ACTN3    | 204.32 | 2.13                 | frame           | HSA11 | 66.07 |
| 12 | FBXL11   | 224.14 | 1.95                 | placed          | HSA11 | 66.64 |
| 12 | ADRBK1   | 229.6  | 10.38                | frame           | HSA11 | 66.79 |
| 12 | TKY499   | 255.68 | 11.06                | frame           |       |       |
| 12 | COR058   | 260.74 | 4.14                 | placed          |       |       |
| 12 | NADSYN1  | 271.26 | 7.61                 | frame           | HSA11 | 70.84 |
| 12 | IGF2     | 281.94 | 1.88                 | placed          | HSA11 | 2.11  |
| 12 | LSP1     | 287.14 | 3.03                 | frame           | HSA11 | 1.83  |
| 12 | TH       | 308.19 | 3.03                 | frame           | HSA11 | 2.14  |
| 12 | AHT122   | 380.35 | 1.84                 | frame           |       |       |
| 12 | UMNe168  | 389.88 | 1.84                 | frame           | HSA11 | 2.8   |
| 12 | DRD4     | 402.39 | 1.53                 | placed          | HSA11 | 0.63  |
| 12 | RPLP2    | 408.44 | 6.93                 | frame           | HSA11 | 0.80  |
| 12 | UCDEQ497 | 442.4  | 1.86                 | frame           |       |       |
| 12 | IFITM3   | 454.59 | 1.86                 | frame           | HSA11 | 0.31  |
| 12 | COR009   | ---    | [EEF1G -<br>PYGM]    | binned          |       |       |
| 12 | UCDEQ411 | ---    | [HRASLS3 -<br>LRFN4] | binned          |       |       |

| Horse Chr. | Marker   | Map Position (cR) | Placement LOD | Assignment      | Human Chr. | Human Mb (Build 36.1) |
|------------|----------|-------------------|---------------|-----------------|------------|-----------------------|
| 13         | MGC11257 | 0                 | 6.41          | frame           | HSA7       | 1.00                  |
| 13         | GPR30    | 0                 | 6.41          | frame_identical | HSA7       | 1.09                  |
| 13         | WIP12    | 26.98             | 5.73          | frame           | HSA7       | 5.20                  |
| 13         | ACTB     | 37.07             | 3.58          | frame           | HSA7       | 5.53                  |
| 13         | SMURF1   | 44.51             | 1.39          | frame           | HSA7       | 98.46                 |
| 13         | ARPC1B   | 46.85             | 0.1           | placed          | HSA7       | 98.81                 |
| 13         | TRRAP    | 54.36             | 1.39          | placed          | HSA7       | 98.31                 |
| 13         | UMNe462  | 59.33             | 1.4           | placed          |            |                       |

|    |                     |        |                         |                 |       |        |
|----|---------------------|--------|-------------------------|-----------------|-------|--------|
| 13 | VHL161              | 66.53  | 1.39                    | frame           |       |        |
| 13 | TKY585              | 78.72  | 0.11                    | placed          |       |        |
| 13 | AZGP1               | 81.04  | 4.47                    | frame           | HSA7  | 99.40  |
| 13 | TKY031              | 88.31  | 4.47                    | frame           |       |        |
| 13 | TKY3276             | 115.57 | 1.41                    | frame           |       |        |
| 13 | TKY1025             | 143.18 | 2.42                    | frame           |       |        |
| 13 | TKY979              | 148.16 | 1.04                    | placed          |       |        |
| 13 | UMNe451             | 148.16 | 1.04                    | placed          |       |        |
| 13 | UMNe305             | 148.16 | 2.78                    | placed          |       |        |
| 13 | GNB2                | 150.64 | 2.64                    | placed          | HSA7  | 100.11 |
| 13 | SERPINE1            | 155.62 | 4.78                    | frame           | HSA7  | 100.56 |
| 13 | UMNe217             | 155.62 | 4.78                    | frame_identical |       |        |
| 13 | TKY835              | 163.19 | 2.64                    | frame           |       |        |
| 13 | TKY1398             | 173.36 | 2.64                    | frame           | HSA7  | 101.2  |
| 13 | POR                 | 183.9  | 5.45                    | frame           | HSA7  | 75.42  |
| 13 | UM030               | 186.53 | 3.49                    | placed          | HSA7  | 75     |
| 13 | HIP1                | 189.21 | 1.72                    | placed          | HSA7  | 75.00  |
| 13 | UMNe133             | 194.66 | 2.03                    | placed          |       |        |
| 13 | ELN                 | 200.03 | 3.08                    | frame           | HSA7  | 73.08  |
| 13 | 13STS01             | 218.44 | 3.08                    | frame           |       |        |
| 13 | COR069              | ---    | [p-terminal -<br>WIPI2] | binned          |       |        |
| 13 | PRKRIP1             | ---    | [TKY1398 -<br>ELN]      | binned          | HSA7  | 101.82 |
| 13 | KDEL2               | ---    | [ACTB -<br>VHL161]      | binned          | HSA7  | 6.47   |
| 13 | DKFZp434J<br>1015   | ---    | [ACTB -<br>VHL161]      | binned          | HSA7  | 6.63   |
| 13 | LRCH4               | ---    | [TKY031 -<br>TKY1025]   | binned          | HSA7  | 100.01 |
| 13 | TKY1092             | ---    | [POR -<br>13STS01]      | binned          |       |        |
| 13 | UMNe145             | 0      | 3.98                    | frame           |       |        |
| 13 | AUTS2               | 14.34  | 3.98                    | frame           | HSA7  | 68.70  |
| 13 | UMNe552             | 17.68  | 2.4                     | placed          | HSA7  | 70.1   |
| 13 | CH241-<br>102O19_T7 | 24.79  | 2.38                    | placed          |       |        |
| 13 | LEX041              | 28.47  | 2.77                    | placed          | HSA7  | 71.6   |
| 13 | VHL47               | 28.47  | 2.77                    | placed          |       |        |
| 13 | CCT6A               | 39.52  | 4.76                    | frame           | HSA7  | 56.09  |
| 13 | ERAF                | 50.2   | 4.6                     | placed          | HSA16 | 31.45  |
| 13 | SGCV03              | 53.54  | 2.3                     | placed          |       |        |
| 13 | VKORC1              | 56.88  | 5.8                     | frame           | HSA16 | 31.01  |
| 13 | C16orf53            | 67.56  | 2.54                    | placed          | HSA16 | 29.74  |
| 13 | ALDOA               | 71.13  | 0.21                    | placed          | HSA16 | 29.97  |
| 13 | CORO1A              | 71.13  | 0.22                    | placed          | HSA16 | 30.10  |
| 13 | ATP2A1              | 74.81  | 7.34                    | frame           | HSA16 | 28.80  |
| 13 | EIF3S8              | 74.81  | 7.34                    | frame_identical | HSA16 | 28.63  |
| 13 | UMNe601             | 82.17  | 4.16                    | placed          |       |        |
| 13 | IL4R                | 102.04 | 5.69                    | frame           | HSA16 | 27.23  |
| 13 | TKY416              | 102.04 | 5.69                    | frame_identical |       |        |
| 13 | UMNe344             | 113.94 | 5.69                    | frame           |       |        |

|    |                     |        |                       |                 |       |       |
|----|---------------------|--------|-----------------------|-----------------|-------|-------|
| 13 | TKY1176             | 126.87 | 2.33                  | placed          |       |       |
| 13 | RBBP6               | 151.91 | 5.82                  | frame           | HSA16 | 24.46 |
| 13 | UMNe276             | 151.91 | 5.82                  | frame_identical |       |       |
| 13 | TKY581              | 151.91 | 5.82                  | frame_identical | HSA16 | 23.2  |
| 13 | PRKCB1              | 151.91 | 5.82                  | frame_identical | HSA16 | 23.75 |
| 13 | METTL9              | 156.42 | 2.51                  | placed          | HSA16 | 21.52 |
| 13 | TKY371              | 165.44 | 4.03                  | frame           | HSA16 | 22.1  |
| 13 | AHT095              | 174.47 | 0.38                  | placed          |       |       |
| 13 | TKY852              | 195.88 | 2.05                  | frame           |       |       |
| 13 | COQ7                | 217.29 | 2.09                  | placed          | HSA16 | 18.99 |
| 13 | SMG1                | 225.97 | 2.05                  | frame           | HSA16 | 18.72 |
| 13 | TKY421              | 244.98 | 4.2                   | frame           | HSA16 | 17.6  |
| 13 | C16orf63            | 260.03 | 5.49                  | frame           | HSA16 | 15.87 |
| 13 | TKY500              | 292    | 4.26                  | frame           |       |       |
| 13 | NVHEQ098            | 313.28 | 1.04                  | placed          |       |       |
| 13 | UMNe126             | 313.28 | 1.04                  | placed          |       |       |
| 13 | BFAR                | 318.6  | 4.26                  | frame           | HSA16 | 14.63 |
| 13 | ASB01               | 329.24 | 1.11                  | placed          |       |       |
| 13 | TKY594              | 333.99 | 3.32                  | placed          | HSA16 | 12.3  |
| 13 | PRM1                | 348.99 | 5.62                  | frame           | HSA16 | 11.28 |
| 13 | TKY561              | 362.53 | 2.37                  | placed          | HSA16 | 10.6  |
| 13 | TKY1047             | 370.16 | 1.65                  | frame           | HSA16 | 10.5  |
| 13 | CARHSP1             | 386.04 | 1.65                  | frame           | HSA16 | 8.86  |
| 13 | C16orf72            | 390.17 | 0.47                  | placed          | HSA16 | 9.09  |
| 13 | UMNe364             | 435.76 | 1.81                  | frame           | HSA16 | 10.6  |
|    |                     |        |                       |                 |       |       |
| 13 | TKY981              | 472.18 | 1.81                  | frame           |       |       |
| 13 | TKY693              | 498.42 | 2.26                  | placed          |       |       |
| 13 | VASN                | 507.46 | 3.5                   | frame           | HSA16 | 4.36  |
| 13 | CREBBP              | 523.42 | 3.5                   | frame           | HSA16 | 3.72  |
| 13 | THOC6               | 523.42 | 3.5                   | frame_identical | HSA16 | 3.01  |
| 13 | ASB37               | ---    | [UMNe145 -<br>CCT6A]  | binned          |       |       |
| 13 | UMNe278             | ---    | [SMG1 -<br>C16orf63]  | binned          |       |       |
| 13 | UMNe431             | ---    | [UMNe344 -<br>TKY371] | binned          | HSA16 | 20.8  |
| 13 | UBPH                | ---    | [UMNe344 -<br>TKY371] | binned          | HSA16 | 23.48 |
| 13 | AHT030              | ---    | [IL4R -<br>RBBP6]     | binned          | HSA16 | 25.6  |
| 13 | GUSB                | ---    | [AUTS2 -<br>VKORC1]   | binned          | HSA7  | 65.06 |
| 13 | PHKG1               | ---    | [AUTS2 -<br>VKORC1]   | binned          | HSA7  | 56.12 |
| 13 | CH241-<br>106P18_T7 | 0      | 1.29                  | frame           |       |       |
| 13 | HN1L                | 16.48  | 0.29                  | placed          | HSA16 | 1.67  |
| 13 | TSC2                | 23.99  | 1.29                  | frame           | HSA16 | 2.04  |
|    |                     |        |                       |                 |       |       |
| 13 | STUB1               | 56.34  | 1.43                  | placed          | HSA16 | 0.67  |
| 13 | HBA1                | 63.21  | 1.29                  | frame           | HSA16 | 0.17  |

| <b>Horse<br/>Chr.</b> | <b>Marker</b> | <b>Map<br/>Position<br/>(cR)</b> | <b>Placement<br/>LOD</b> | <b>Assignment</b> | <b>Human<br/>Chr.</b> | <b>Human<br/>Mb (Build<br/>36.1)</b> |
|-----------------------|---------------|----------------------------------|--------------------------|-------------------|-----------------------|--------------------------------------|
| 14                    | COR103/104    | 0                                | 0.57                     | placed            |                       |                                      |
| 14                    | TKY948        | 19.37                            | 4.45                     | frame             | HSA5                  | 179.9                                |
| 14                    | RPL7ps        | 54.3                             | 4.45                     | frame             |                       |                                      |
| 14                    | CANX          | 54.3                             | 4.45                     | frame_identical   | HSA5                  | 179.06                               |
| 14                    | SQSTM1        | 57.76                            | 1.64                     | placed            | HSA5                  | 179.18                               |
| 14                    | HK3           | 97.11                            | 0.6                      | frame             | HSA5                  | 176.24                               |
| 14                    | LMAN2         | 116.26                           | 0.6                      | frame             | HSA5                  | 176.69                               |
| 14                    | AHT029        | 125.92                           | 2.98                     | placed            | HSA5                  | 176                                  |
| 14                    | TKY1053       | 149.03                           | 1.91                     | placed            | HSA5                  | 173.8                                |
| 14                    | BNIP1         | 154.81                           | 3.1                      | frame             | HSA5                  | 172.50                               |
| 14                    | TKY584        | 165.57                           | 2.57                     | placed            |                       |                                      |
| 14                    | HTG11         | 170.63                           | 0.28                     | placed            | HSA5                  | 171.7                                |
| 14                    | UMNe315       | 175.73                           | 2.03                     | placed            |                       |                                      |
| 14                    | STK10         | 181.11                           | 3.1                      | frame             | HSA5                  | 171.40                               |
| 14                    | FGF18         | 181.11                           | 3.1                      | frame_identical   | HSA5                  | 170.78                               |
| 14                    | DUSP1         | 191.94                           | 0.67                     | placed            | HSA5                  | 172.13                               |
| 14                    | LCP2          | 217.44                           | 1.32                     | frame             | HSA5                  | 169.61                               |
| 14                    | RARS          | 221.6                            | 1.53                     | placed            | HSA5                  | 167.85                               |
| 14                    | TKY267        | 229.64                           | 0.38                     | placed            | HSA5                  | 168.2                                |
| 14                    | UMNe581       | 233.36                           | 1.32                     | frame             | HSA5                  | 168.6                                |
| 14                    | LEX043        | 274.58                           | 2.49                     | frame             | HSA5                  | 163.5                                |
| 14                    | GABRG2        | 291.24                           | 2.49                     | frame             | HSA5                  | 161.43                               |
| 14                    | UMNe406       | 295.08                           | 0.16                     | placed            |                       |                                      |
| 14                    | C1QTNF2       | 295.08                           | 0.16                     | placed            | HSA5                  | 159.71                               |
| 14                    | UMNe154       | 295.08                           | 0.16                     | placed            | HSA5                  | 162.6                                |
| 14                    | MAT2B         | 295.08                           | 0.16                     | placed            | HSA5                  | 162.86                               |
| 14                    | HMMR          | 295.08                           | 0.16                     | placed            | HSA5                  | 162.82                               |
| 14                    | TKY1145       | 302.76                           | 1.2                      | placed            |                       |                                      |
| 14                    | EBF1          | 310.44                           | 2.82                     | frame             | HSA5                  | 158.06                               |
| 14                    | HTG29         | 314.43                           | 0.17                     | placed            |                       |                                      |
| 14                    | CLINT1        | 322.75                           | 2.52                     | placed            | HSA5                  | 157.15                               |
| 14                    | MFAP3         | 342.06                           | 0.11                     | placed            | HSA5                  | 153.40                               |
| 14                    | CYFIP2        | 346.89                           | 4.24                     | frame             | HSA5                  | 156.63                               |
| 14                    | UMNe227       | 346.89                           | 4.24                     | frame_identical   | HSA5                  | 155.4                                |
| 14                    | TKY440        | 346.89                           | 4.24                     | frame_identical   | HSA5                  | 155.4                                |
| 14                    | CRSP9         | 346.89                           | 4.24                     | frame_identical   | HSA5                  | 156.50                               |
| 14                    | SOX30         | 346.89                           | 4.24                     | frame_identical   | HSA5                  | 156.99                               |
| 14                    | GRIA1         | 363.03                           | 1.53                     | placed            | HSA5                  | 152.85                               |
| 14                    | VHL204        | 384.55                           | 4.24                     | frame             |                       |                                      |
| 14                    | TKY390        | 393.25                           | 2.65                     | placed            |                       |                                      |
| 14                    | TKY376        | 393.25                           | 2.65                     | placed            | HSA5                  | 151.5                                |
| 14                    | UM010         | 393.25                           | 2.65                     | placed            |                       |                                      |
| 14                    | ANXA6         | 401.28                           | 4.5                      | frame             | HSA5                  | 150.46                               |
| 14                    | RPS14         | 418.13                           | 4.25                     | frame             | HSA5                  | 149.80                               |
| 14                    | CD74          | 422.14                           | 0.16                     | placed            | HSA5                  | 149.76                               |
| 14                    | 14STS01       | 425.99                           | 2.57                     | placed            |                       |                                      |

|    |         |         |      |                 |      |        |
|----|---------|---------|------|-----------------|------|--------|
| 14 | SLC26A2 | 429.83  | 4.25 | frame           | HSA5 | 149.32 |
| 14 | CSF1R   | 429.83  | 4.25 | frame_identical | HSA5 | 149.41 |
| 14 | PDE6A   | 429.83  | 4.25 | frame_identical | HSA5 | 149.22 |
| 14 | TKY329  | 438.15  | 4.74 | placed          | HSA5 | 148.9  |
| 14 | ADRB2   | 446.84  | 1.59 | frame           | HSA5 | 148.19 |
| 14 | DPYSL3  | 451.21  | 0.12 | placed          | HSA5 | 146.75 |
| 14 | UM032   | 464.32  | 2.01 | placed          |      |        |
| 14 | HTR4    | 479.24  | 1.59 | frame           | HSA5 | 147.81 |
| 14 | UMNe474 | 507.62  | 1.07 | placed          | HSA5 | 145.7  |
| 14 | TKY930  | 533.21  | 2.44 | frame           |      |        |
| 14 | SH3RF2  | 553.43  | 1.98 | frame           | HSA5 | 145.30 |
| 14 | TKY1990 | 565.42  | 1.98 | frame           | HSA5 | 144.9  |
| 14 | VHL209  | 569.14  | 2.36 | placed          |      |        |
| 14 | NR3C1   | 572.84  | 4.58 | placed          | HSA5 | 142.64 |
| 14 | LEX047  | 583.96  | 4.63 | placed          | HSA5 | 141.9  |
| 14 | UMNe460 | 591.64  | 1.04 | frame           |      |        |
| 14 | TAF7    | 604.68  | 1.04 | frame           | HSA5 | 140.68 |
| 14 | CD14    | 614.31  | 3.7  | placed          | HSA5 | 139.99 |
| 14 | HARS    | 619.7   | 2.04 | placed          | HSA5 | 140.03 |
| 14 | HBEGF   | 630.42  | 7.38 | frame           | HSA5 | 139.69 |
| 14 | UBE2D2  | 649.73  | 6.21 | frame           | HSA5 | 138.92 |
| 14 | JMJD1B  | 668.16  | 4.38 | frame           | HSA5 | 137.72 |
| 14 | SMAD5   | 677     | 2.59 | placed          | HSA5 | 135.50 |
| 14 | UMNe234 | 677     | 2.57 | placed          | HSA5 | 135    |
| 14 | MYOT    | 681.55  | 4.38 | frame           | HSA5 | 137.23 |
| 14 | TKY844  | 691.16  | 2.31 | placed          | HSA5 | 135.7  |
| 14 | PPP2CA  | 707.3   | 2.01 | frame           | HSA5 | 133.56 |
| 14 | DDX46   | 718.72  | 2.02 | placed          | HSA5 | 134.12 |
| 14 | VDAC1   | 724.08  | 2.01 | frame           | HSA5 | 133.34 |
| 14 | HSPA4   | 762.02  | 2.66 | frame           | HSA5 | 132.42 |
| 14 | KIF3A   | 779.41  | 2.56 | frame           | HSA5 | 132.06 |
| 14 | IRF1    | 801.18  | 2.56 | frame           | HSA5 | 131.85 |
| 14 | TKY647  | 838.89  | 1.99 | placed          |      |        |
| 14 | CSS3    | 848.49  | 5.11 | frame           | HSA5 | 129.27 |
| 14 | ALDH7A1 | 871.31  | 3.04 | frame           | HSA5 | 125.91 |
| 14 | MEGF10  | 884.97  | 3.04 | frame           | HSA5 | 126.65 |
| 14 | FBN2    | 895.75  | 3    | placed          | HSA5 | 127.62 |
| 14 | TKY1156 | 914.05  | 4.27 | frame           |      |        |
| 14 | TKY1036 | 944.66  | 3.33 | frame           |      |        |
| 14 | ZNF608  | 960.65  | 3.33 | frame           | HSA5 | 124.00 |
| 14 | CSNK1G3 | 991.17  | 4.79 | frame           | HSA5 | 122.88 |
| 14 | PPIC    | 995.18  | 0.95 | placed          | HSA5 | 122.39 |
| 14 | TKY3053 | 1003.21 | 4.2  | placed          | HSA5 | 121.9  |
| 14 | SNCAIP  | 1015.77 | 6.72 | frame           | HSA5 | 121.68 |
| 14 | HSD17B4 | 1048.18 | 2.26 | placed          | HSA5 | 118.82 |
| 14 | DMXL1   | 1058.97 | 1.72 | frame           | HSA5 | 118.44 |
| 14 | YTHDC2  | 1075.11 | 1.72 | frame           | HSA5 | 112.88 |
| 14 | SEMA6A  | 1124.66 | 1.73 | placed          | HSA5 | 115.81 |
| 14 | TRIM36  | 1140.8  | 0.23 | placed          | HSA5 | 114.49 |
| 14 | FEM1C   | 1150.94 | 1.49 | frame           | HSA5 | 114.88 |

|    |          |         |                     |                 |      |        |
|----|----------|---------|---------------------|-----------------|------|--------|
| 14 | CAMK4    | 1181.38 | 1.49                | frame           | HSA5 | 110.59 |
| 14 | PJA2     | 1208.28 | 2.26                | frame           | HSA5 | 108.70 |
| 14 | SLC25A46 | 1224.43 | 0.14                | placed          | HSA5 | 110.10 |
| 14 | FBXL17   | 1238.82 | 2.26                | frame           | HSA5 | 107.22 |
| 14 | UMNe489  | 1243.18 | 0.31                | placed          |      |        |
| 14 | SOD2ps   | 1243.18 | 0.12                | placed          |      |        |
| 14 | 14STS02  | 1284.65 | 3.32                | placed          |      |        |
| 14 | EFNA5    | 1338.08 | 3.65                | placed          | HSA5 | 106.74 |
| 14 | TKY435   | 1357.54 | 6.65                | placed          | HSA5 | 103    |
| 14 | TKY395   | 1370.54 | 1.92                | placed          | HSA5 | 102.7  |
| 14 | PAM      | 1374    | 4.37                | frame           | HSA5 | 102.23 |
| 14 | ST8SIA4  | 1389.38 | 4.37                | frame           | HSA5 | 100.17 |
| 14 | CHD1     | 1393.22 | 2.58                | placed          | HSA5 | 98.22  |
| 14 | PCSK1    | 1401.55 | 1.07                | frame           | HSA5 | 95.75  |
| 14 | ZuBeEq13 | 1415.95 | 1.07                | frame           | HSA5 | 96.3   |
| 14 | KIAA0372 | 1436.29 | 2.14                | placed          | HSA5 | 94.83  |
| 14 | NR2F1    | 1440.49 | 3.72                | frame           | HSA5 | 92.94  |
| 14 | GPR98    | 1461.31 | 6.22                | frame           | HSA5 | 89.89  |
| 14 | TKY317   | 1468.24 | 2.68                | placed          |      |        |
| 14 | MEF2C    | 1471.7  | 4.63                | frame           | HSA5 | 88.05  |
| 14 | UM016    | 1471.7  | 4.63                | frame_identical |      |        |
| 14 | TMEM161B | 1486.54 | 4.63                | frame           | HSA5 | 87.53  |
| 14 | AHT083   | 1517.46 | 0.59                | placed          |      |        |
| 14 | AHT088   | 1524.18 | 2.2                 | frame           |      |        |
| 14 | RASA1    | 1533.98 | 2.2                 | frame           | HSA5 | 86.60  |
| 14 | HAPLN1   | 1550.37 | 8.6                 | frame           | HSA5 | 82.97  |
| 14 | CSPG2    | 1556.9  | 2.2                 | placed          | HSA5 | 82.80  |
| 14 | ZFYVE16  | 1575.46 | 8.07                | frame           | HSA5 | 79.74  |
| 14 | UMNe550  | 1575.46 | 8.07                | frame_identical |      |        |
| 14 | SCAMP1   | 1592.12 | 0.52                | frame           | HSA5 | 77.69  |
| 14 | DMGDH    | 1601.25 | 0.61                | placed          | HSA5 | 78.33  |
| 14 | ARSB     | 1606.05 | 0.52                | frame           | HSA5 | 78.11  |
| 14 | TKY1151  | 1616.19 | 2.32                | placed          |      |        |
| 14 | UMNe125  | 1636.47 | 0.54                | placed          | HSA5 | 77.3   |
| 14 | LEX078   | 1636.47 | 1.84                | placed          |      |        |
| 14 | UMNe194  | 1646.02 | 1.03                | placed          | HSA5 | 75.5   |
| 14 | VHL162   | 1662.68 | 2.73                | frame           |      |        |
| 14 | SV2C     | 1675.16 | 0.61                | placed          | HSA5 | 75.42  |
| 14 | HMGCR    | 1679.32 | 2.73                | frame           | HSA5 | 74.67  |
| 14 | HEXB     | 1691.81 | 0.51                | frame           | HSA5 | 74.02  |
| 14 | COR002   | 1691.81 | 0.51                | frame_identical | HSA5 | 73.7   |
| 14 | TKY2524  | 1699.8  | 0.49                | placed          | HSA5 | 73.8   |
| 14 | TKY438   | 1703.5  | 0.51                | frame           | HSA5 | 73.6   |
| 14 | RGNEF    | 1725.26 | 1.61                | placed          | HSA5 | 72.96  |
| 14 | UMNe239  | 1744.42 | 2.13                | placed          |      |        |
| 14 | TKY636   | 1744.42 | 2.1                 | placed          |      |        |
| 14 | MCCC2    | 1748.41 | 1.07                | frame           | HSA5 | 70.92  |
| 14 | 14STS03  | 1764.4  | 1.07                | frame           |      |        |
| 14 | TKY1114  | ---     | [SLC26A2 -<br>HTR4] | binned          | HSA5 | 146.5  |
| 14 | TKY3521  | ---     | [VHL204 -           | binned          | HSA5 | 150.5  |

|    |           |     |                      |        |      |        |
|----|-----------|-----|----------------------|--------|------|--------|
|    |           |     | RPS14]               |        |      |        |
| 14 | SPARC     | --- | [VHL204 - RPS14]     | binned | HSA5 | 151.02 |
| 14 | YIPF5     | --- | [HTR4 - UMNe460]     | binned | HSA5 | 143.52 |
| 14 | LARP1     | --- | [EBF1 - VHL204]      | binned | HSA5 | 154.07 |
| 14 | IL12B     | --- | [GABRG2 - CYFIP2]    | binned | HSA5 | 158.67 |
| 14 | TUDPEc277 | --- | [GABRG2 - CYFIP2]    | binned | HSA5 | 158.0  |
| 14 | TKY787    | --- | [UMNe581 - EBF1]     | binned |      |        |
| 14 | TKY656    | --- | [LEX043 - EBF1]      | binned |      |        |
| 14 | TKY841    | --- | [UMNe581 - EBF1]     | binned |      |        |
| 14 | UMNe321   | --- | [JMJD1B - PPP2CA]    | binned |      |        |
| 14 | UMNe458   | --- | [HBEGF - JMJD1B]     | binned |      |        |
| 14 | HMB1      | --- | [JMJD1B - PPP2CA]    | binned |      |        |
| 14 | CSF2      | --- | [KIF3A - CSS3]       | binned | HSA5 | 131.44 |
| 14 | UMNe187   | --- | [BNIP1 - LCP2]       | binned |      |        |
| 14 | CCDC100   | --- | [ZNF608 - SNCAIP]    | binned | HSA5 | 122.71 |
| 14 | TKY1677   | --- | [CSS3 - MEGF10]      | binned | HSA5 | 126.4  |
| 14 | UMNe584   | --- | [AHT088 - HAPLN1]    | binned |      |        |
| 14 | TKY491    | --- | [AHT088 - HAPLN1]    | binned |      |        |
| 14 | TKY971    | --- | [HAPLN1 - SCAMP1]    | binned |      |        |
| 14 | THBS4     | --- | [HAPLN1 - SCAMP1]    | binned | HSA5 | 79.37  |
| 14 | TKY527    | --- | [HAPLN1 - SCAMP1]    | binned |      |        |
| 14 | RPS23     | --- | [HAPLN1 - SCAMP1]    | binned | HSA5 | 81.60  |
| 14 | TNPO1     | --- | [HMGCR - MCCC2]      | binned | HSA5 | 72.15  |
| 14 | TKY749    | --- | [ZFYVE16 - ARSB]     | binned |      |        |
| 14 | TKY473    | --- | [ST8SIA4 - ZuBeEq13] | binned |      |        |
| 14 | CAST      | --- | [ST8SIA4 - ZuBeEq13] | binned | HSA5 | 96.06  |
| 14 | UMNe244   | --- | [ST8SIA4 - ZuBeEq13] | binned | HSA5 | 95.6   |



| Horse Chr. | Marker          | Map Position (cR) | Placement LOD | Assignment      | Human Chr. | Human Mb (Build 36.1) |
|------------|-----------------|-------------------|---------------|-----------------|------------|-----------------------|
| 15         | TKY1095         | 0                 | 8.79          | frame           |            |                       |
| 15         | SEPT10          | 33.63             | 3.56          | frame           | HSA2       | 109.66                |
| 15         | RANBP2          | 43.24             | 2.56          | frame           | HSA2       | 108.70                |
| 15         | SULT1C1         | 56.56             | 0.23          | placed          | HSA2       | 108.27                |
| 15         | TKY383          | 77.21             | 2.18          | frame           | HSA2       | 107.6                 |
| 15         | UMNe275         | 83.6              | 2.8           | placed          |            |                       |
| 15         | UMNe605         | 90.17             | 1.94          | frame           |            |                       |
| 15         | CH241-102M19_T7 | 107.4             | 1.44          | frame           |            |                       |
| 15         | TKY541          | 120.75            | 1.44          | frame           |            |                       |
| 15         | TKY392          | 138.87            | 3.94          | frame           |            |                       |
| 15         | IL18RAP         | 153.84            | 2.23          | frame           | HSA2       | 102.40                |
| 15         | TBC1D8          | 168.81            | 2.23          | frame           | HSA2       | 100.99                |
| 15         | REV1L           | 184.34            | 5.98          | frame           | HSA2       | 99.38                 |
| 15         | ACTR1B          | 206.34            | 1.15          | frame           | HSA2       | 97.64                 |
| 15         | SEMA4C          | 210.53            | 0.28          | placed          | HSA2       | 96.89                 |
| 15         | PROM2           | 223.86            | 2.15          | placed          | HSA2       | 95.30                 |
| 15         | 15STS02         | 228.1             | 1.15          | frame           |            |                       |
| 15         | MERTK           | 263.55            | 2.65          | frame           | HSA2       | 112.37                |
| 15         | SLC20A1         | 281.2             | 0.14          | placed          | HSA2       | 113.12                |
| 15         | IL1A            | 284.33            | 2.65          | frame           | HSA2       | 113.25                |
| 15         | IL1B            | 287.51            | 0.17          | placed          | HSA2       | 113.30                |
| 15         | RPIA            | 293.9             | 3.82          | frame           | HSA2       | 88.77                 |
| 15         | UMNe198         | 311.45            | 2.11          | placed          | HSA2       | 88.2                  |
| 15         | REEP1           | 318.91            | 1.7           | frame           | HSA2       | 86.29                 |
| 15         | SFTP8           | 322.63            | 0.24          | placed          | HSA2       | 85.74                 |
| 15         | MAT2A           | 322.63            | 0.19          | placed          | HSA2       | 85.62                 |
| 15         | COR076          | 335.94            | 1.15          | frame           | HSA2       | 85.9                  |
| 15         | TKY861          | 340.15            | 2.64          | placed          | HSA2       | 85                    |
| 15         | TMSB10          | 348.53            | 1.15          | frame           | HSA2       | 84.99                 |
| 15         | CAPG            | 357.27            | 2.18          | placed          | HSA2       | 85.48                 |
| 15         | TKY814          | 366.19            | 3.19          | placed          |            |                       |
| 15         | S22             | 388.48            | 2.43          | frame           |            |                       |
| 15         | B-8             | 392.34            | 2.01          | placed          |            |                       |
| 15         | CTNNA2          | 403.97            | 2.23          | placed          | HSA2       | 79.59                 |
| 15         | TKY976          | 403.97            | 2.23          | placed          | HSA2       | 79.9                  |
| 15         | TKY2955         | 403.97            | 2.23          | placed          | HSA2       | 81                    |
| 15         | UMNe250         | 403.97            | 2.23          | placed          |            |                       |
| 15         | NVHEQ083        | 414.79            | 0.18          | placed          | HSA2       | 75.8                  |
| 15         | TKY3526         | 414.79            | 0.18          | placed          | HSA2       | 76.9                  |
| 15         | TKY2469         | 414.79            | 0.18          | placed          | HSA2       | 76                    |
| 15         | HK2             | 418.3             | 1.9           | frame           | HSA2       | 74.91                 |
| 15         | MOBK1B          | 418.3             | 1.9           | frame_identical | HSA2       | 74.24                 |
| 15         | TKY369          | 422.02            | 1.26          | placed          | HSA2       | 74.1                  |
| 15         | TKY518          | 433.65            | 1.9           | frame           | HSA2       | 73                    |
| 15         | ADD2            | 444.54            | 2.3           | placed          | HSA2       | 70.74                 |
| 15         | TIA1            | 448.04            | 1.92          | frame           | HSA2       | 70.29                 |

|    |         |         |      |                 |      |       |
|----|---------|---------|------|-----------------|------|-------|
| 15 | TKY011  | 448.04  | 1.92 | frame_identical | HSA2 | 70.4  |
| 15 | PLEK    | 471.42  | 3.94 | frame           | HSA2 | 68.45 |
| 15 | TKY1091 | 471.42  | 3.94 | frame_identical | HSA2 | 68    |
| 15 | LEX051  | 475.14  | 2.22 | placed          | HSA2 | 66.9  |
| 15 | TKY327  | 483.18  | 2.44 | placed          |      |       |
| 15 | GFPT1   | 506.58  | 2.37 | placed          | HSA2 | 69.41 |
| 15 | TKY531  | 521.57  | 0.16 | placed          |      |       |
| 15 | SLC1A4  | 525.17  | 2.06 | frame           | HSA2 | 65.07 |
| 15 | TKY2992 | 535.39  | 1.71 | placed          | HSA2 | 64.3  |
| 15 | MDH1    | 542.24  | 2.06 | frame           | HSA2 | 63.67 |
| 15 | UMNe219 | 615.73  | 1.38 | placed          |      |       |
| 15 | COMMD1  | 666.09  | 1.91 | frame           | HSA2 | 61.99 |
| 15 | LEX046  | 669.22  | 0.32 | placed          |      |       |
| 15 | PAPOLG  | 675.66  | 0.28 | placed          | HSA2 | 60.84 |
| 15 | UMNe156 | 682.24  | 1.1  | placed          | HSA2 | 59.7  |
| 15 | TKY571  | 682.24  | 1.1  | placed          |      |       |
| 15 | VRK2    | 689     | 1.91 | frame           | HSA2 | 58.13 |
| 15 | EFEMP1  | 699.67  | 2.48 | placed          | HSA2 | 55.95 |
| 15 | RTN4    | 714.39  | 5.61 | frame           | HSA2 | 55.05 |
| 15 | SPTBN1  | 721.85  | 2.07 | placed          | HSA2 | 54.61 |
| 15 | ACYP2   | 729.4   | 3.27 | placed          | HSA2 | 54.20 |
| 15 | TKY2891 | 744.46  | 5.61 | frame           | HSA2 | 52.8  |
| 15 | FSHR    | 772.14  | 1.31 | frame           | HSA2 | 49.04 |
| 15 | FBXO11  | 787.85  | 1.12 | frame           | HSA2 | 47.89 |
| 15 | LHCGR   | 804.09  | 1.11 | frame           | HSA2 | 48.77 |
| 15 | ASB15   | 812.52  | 0.31 | placed          |      |       |
| 15 | TKY779  | 816.7   | 1.11 | frame           |      |       |
| 15 | 15STS01 | 843.17  | 1.88 | frame           |      |       |
| 15 | TKY926  | 872.4   | 3.48 | frame           |      |       |
| 15 | MCFD2   | 886.3   | 0.92 | placed          | HSA2 | 46.98 |
| 15 | TKY815  | 886.3   | 1.85 | placed          | HSA2 | 47    |
| 15 | ZFP36L2 | 895.07  | 3.48 | frame           | HSA2 | 43.30 |
| 15 | ASB02   | 895.07  | 3.48 | frame_identical | HSA2 | 44.2  |
| 15 | SLC3A1  | 899.45  | 0.27 | placed          | HSA2 | 44.36 |
| 15 | SGCV21  | 903.64  | 2.3  | placed          | HSA2 | 44.2  |
| 15 | TKY885  | 931.57  | 4.07 | frame           | HSA2 | 40.3  |
| 15 | SLC8A1  | 962.71  | 3.95 | frame           | HSA2 | 40.20 |
| 15 | TKY3086 | 966.6   | 0.61 | placed          | HSA2 | 40.3  |
| 15 | MAP4K3  | 975.09  | 3.95 | frame           | HSA2 | 39.33 |
| 15 | UMNe373 | 975.09  | 3.95 | frame_identical | HSA2 | 37.7  |
| 15 | ASB19   | 975.09  | 3.95 | frame_identical | HSA2 | 39.8  |
| 15 | CEBPZ   | 993.53  | 3.92 | frame           | HSA2 | 37.28 |
| 15 | TKY104  | 997.91  | 0.16 | placed          | HSA2 | 33.5  |
| 15 | COR077  | 997.91  | 0.15 | placed          |      |       |
| 15 | LTBP1   | 1006.73 | 3.92 | frame           | HSA2 | 33.03 |
| 15 | XDH     | 1032.37 | 4.07 | placed          | HSA2 | 31.41 |
| 15 | PPP1CB  | 1081.94 | 0.25 | placed          | HSA2 | 28.83 |
| 15 | FOSL2   | 1103    | 4.22 | frame           | HSA2 | 28.47 |
| 15 | NRBP1   | 1103    | 4.22 | frame_identical | HSA2 | 27.50 |
| 15 | CAD     | 1117.54 | 1.66 | placed          | HSA2 | 27.29 |

|    |                |         |                   |                 |      |        |
|----|----------------|---------|-------------------|-----------------|------|--------|
| 15 | TKY629         | 1138.06 | 2.43              | placed          | HSA2 | 26.6   |
| 15 | RAB10          | 1142.66 | 4.22              | frame           | HSA2 | 26.11  |
| 15 | POMC           | 1142.66 | 4.22              | frame_identical | HSA2 | 25.24  |
| 15 | ITSN2          | 1158.02 | 4.1               | frame           | HSA2 | 24.28  |
| 15 | HTG06          | 1175.45 | 4.1               | frame           |      |        |
| 15 | ARID5A         | ---     | [ACTR1B - MERTK]  | binned          | HSA2 | 96.57  |
| 15 | UMNe222        | ---     | [TKY392 - TBC1D8] | binned          | HSA2 | 102.6  |
| 15 | EIF5B          | ---     | [TBC1D8 - ACTR1B] | binned          | HSA2 | 99.32  |
| 15 | TKY795         | ---     | [VRK2 - TKY2891]  | binned          | HSA2 | 54.6   |
| 15 | TKY2810        | ---     | [PLEK - COMMD1]   | binned          | HSA2 | 66     |
| 15 | TKY565         | ---     | [TKY518 - PLEK]   | binned          | HSA2 | 71     |
| 15 | IL1RN          | ---     | [IL1A - REEP1]    | binned          | HSA2 | 113.59 |
| 15 | PAX8           | ---     | [MERTK - RPIA]    | binned          | HSA2 | 113.69 |
| 15 | UMNe575        | ---     | [LTBP1 - RAB10]   | binned          |      |        |
| 15 | UMNe245        | ---     | [SLC8A1 - CEBPZ]  | binned          |      |        |
| 15 | SGCV06         | ---     | [TKY926 - TKY885] | binned          |      |        |
| 15 | UMNe102        | ---     | [COMMD1 - RTN4]   | binned          | HSA2 | 59.1   |
| 15 | UMNe149        | ---     | [COMMD1 - RTN4]   | binned          |      |        |
| 15 | TKY1033        | ---     | [COMMD1 - RTN4]   | binned          |      |        |
| 15 | PELI1          | ---     | [SLC1A4 - COMMD1] | binned          | HSA2 | 64.17  |
| 15 | TKY3402        | ---     | [SLC1A4 - COMMD1] | binned          | HSA2 | 64.3   |
| 15 | COR042         | 0       | 2.82              | frame           |      |        |
| 15 | DDX1           | 16.52   | 2.82              | frame           | HSA2 | 15.65  |
| 15 | TKY433         | 27.58   | 1.32              | placed          | HSA2 | 15.2   |
| 15 | ROCK2          | 60.41   | 7.05              | frame           | HSA2 | 11.24  |
| 15 | UMNe388        | 89.64   | 1.87              | placed          |      |        |
| 15 | DDEF2          | 95.65   | 4.49              | frame           | HSA2 | 9.26   |
| 15 | ID2            | 102.09  | 1.82              | placed          | HSA2 | 8.74   |
| 15 | COR014         | 108.53  | 3.8               | placed          | HSA2 | 6      |
| 15 | HMS01          | 108.53  | 3.8               | placed          |      |        |
| 15 | UMNe084        | 108.53  | 3.8               | placed          |      |        |
| 15 | RSAD2          | 126.29  | 3.32              | frame           | HSA2 | 6.94   |
| 15 | CH241-100A9_T7 | 148.34  | 3.32              | frame           |      |        |
| 15 | TKY1015        | 189.35  | 0.2               | placed          |      |        |
| 15 | 15CA001        | 195.79  | 1.32              | frame           |      |        |
| 15 | TKY1165        | 202.73  | 0.17              | placed          | HSA2 | 3.2    |
| 15 | MYT1L          | 217.86  | 1.32              | frame           | HSA2 | 1.77   |

|    |         |     |                                 |        |      |     |
|----|---------|-----|---------------------------------|--------|------|-----|
| 15 | TKY2783 | --- | [ROCK2 -<br>RSAD2]              | binned | HSA2 | 8.9 |
| 15 | TKY743  | --- | [DDEF2 -<br>CH241-<br>100A9_T7] | binned | HSA2 | 8   |
| 15 | COR075  | --- | [ROCK2 -<br>RSAD2]              | binned | HSA2 | 6   |

| Horse<br>Chr. | Marker               | Map<br>Position<br>(cR) | Placement<br>LOD      | Assignment      | Human<br>Chr. | Human<br>Mb (Build<br>36.1) |
|---------------|----------------------|-------------------------|-----------------------|-----------------|---------------|-----------------------------|
| 16            | TKY1066              | 0                       | 1.36                  | frame           |               |                             |
| 16            | TKY921               | 26.73                   | 1.98                  | placed          |               |                             |
| 16            | GPR175               | 36.27                   | 1.36                  | frame           | HSA3          | 128.77                      |
| 16            | COPG                 | 58.06                   | 5.93                  | frame           | HSA3          | 130.45                      |
| 16            | COR039               | 82                      | 5.8                   | frame           |               |                             |
| 16            | AHT037               | 112.39                  | 3.08                  | frame           |               |                             |
| 16            | RHO                  | 133.7                   | 1.21                  | frame           | HSA3          | 130.73                      |
| 16            | PPARG                | 176.53                  | 1.6                   | frame           | HSA3          | 12.30                       |
| 16            | RAF1                 | 195.62                  | 0.64                  | placed          | HSA3          | 12.60                       |
| 16            | UMNe277              | 204.69                  | 2.18                  | frame           |               |                             |
| 16            | CRELD1               | 222.01                  | 5.55                  | frame           | HSA3          | 9.95                        |
| 16            | TKY279               | 222.01                  | 5.55                  | frame_identical | HSA3          | 10.3                        |
| 16            | HTG03                | 242.76                  | 4.89                  | frame           |               |                             |
| 16            | CH241-<br>101A11_SP6 | 258.77                  | 1.07                  | frame           |               |                             |
| 16            | UMNe348              | 285.91                  | 1.07                  | frame           |               |                             |
| 16            | AHT081               | 347.96                  | 1.13                  | frame           |               |                             |
| 16            | TKY3372              | 362.74                  | 1.13                  | frame           | HSA3          | 5                           |
| 16            | ITPR1                | 366.3                   | 0.13                  | placed          | HSA3          | 4.51                        |
| 16            | BHLHB2               | 373.95                  | 3.99                  | frame           | HSA3          | 5.00                        |
| 16            | AHT063               | 377.93                  | 0.34                  | placed          |               |                             |
| 16            | TKY719               | 409.77                  | 1.89                  | frame           |               |                             |
| 16            | TKY781               | 422.75                  | 1.89                  | frame           |               |                             |
| 16            | CHL1                 | 454.85                  | 1.75                  | frame           | HSA3          | 0.21                        |
| 16            | CH241-<br>111J21_SP6 | 476.36                  | 1.75                  | frame           |               |                             |
| 16            | UMNe122              | ---                     | [TKY3372 -<br>TKY719] | binned          |               |                             |
| 16            | C3orf10              | ---                     | [UMNe277 -<br>HTG03]  | binned          | HSA3          | 10.13                       |
| 16            | GHRL                 | ---                     | [UMNe277 -<br>HTG03]  | binned          | HSA3          | 10.30                       |
| 16            | FOXP1                | 0                       | 1.78                  | frame           | HSA3          | 71.09                       |
| 16            | CH241-<br>102N14_T7  | 16.85                   | 2.28                  | placed          |               |                             |
| 16            | FRMD4B               | 28.95                   | 1.78                  | frame           | HSA3          | 69.30                       |
| 16            | TMF1                 | 49.88                   | 0.87                  | placed          | HSA3          | 69.16                       |
| 16            | MITF                 | 65.48                   | 1.78                  | frame           | HSA3          | 69.87                       |
| 16            | PSMD6                | 0                       | 0                     | frame           | HSA3          | 63.97                       |

|    |                     |        |                                       |                 |      |       |
|----|---------------------|--------|---------------------------------------|-----------------|------|-------|
| 16 | TKY311              | 11.71  | 0.91                                  | placed          | HSA3 | 63.4  |
| 16 | TKY637              | 11.71  | 0.91                                  | placed          | HSA3 | 63.4  |
| 16 | CH241-<br>100N15_T7 | 16.88  | 0                                     | frame           |      |       |
| 16 | UMNe468             | ---    | [p-terminal -<br>CH241-<br>100N15_T7] | binned          |      |       |
| 16 | TKY687              | 0      | 3                                     | frame           |      |       |
| 16 | IL17RD              | 13.8   | 3                                     | frame           | HSA3 | 57.10 |
| 16 | AHT038              | 13.8   | 3                                     | frame_identical | HSA3 | 58.1  |
| 16 | UMNe213             | 13.8   | 3                                     | frame_identical |      |       |
| 16 | SLMAP               | 22.62  | 2.38                                  | placed          | HSA3 | 57.72 |
| 16 | ARHGEF3             | 36.49  | 4.81                                  | frame           | HSA3 | 56.74 |
| 16 | WNT5A               | 56.9   | 4.02                                  | frame           | HSA3 | 55.47 |
| 16 | TKY350              | 66.14  | 2.67                                  | placed          |      |       |
| 16 | TKY349              | 70.55  | 3.68                                  | placed          | HSA3 | 54.5  |
| 16 | LEX059              | 75.16  | 3.21                                  | placed          | HSA3 | 54.1  |
| 16 | CACNA1D             | 79.79  | 4.02                                  | frame           | HSA3 | 53.50 |
| 16 | TKT                 | 103.9  | 4.88                                  | frame           | HSA3 | 53.23 |
| 16 | WDR51A              | 120.07 | 4.88                                  | frame           | HSA3 | 52.08 |
| 16 | RPL29               | 141.97 | 0.97                                  | frame           | HSA3 | 52.00 |
| 16 | TKY1069             | 161.45 | 0.97                                  | frame           | HSA3 | 52.4  |
| 16 | IFRD2               | 197.27 | 3.83                                  | frame           | HSA3 | 50.30 |
| 16 | RBM5                | 214.8  | 2.18                                  | frame           | HSA3 | 50.10 |
| 16 | HMS74               | 214.8  | 2.18                                  | frame_identical |      |       |
| 16 | GPX1                | 214.8  | 2.18                                  | frame_identical | HSA3 | 49.37 |
| 16 | IHPK2               | 234.92 | 2.18                                  | frame           | HSA3 | 48.70 |
| 16 | HTG13               | 255.15 | 1.68                                  | placed          |      |       |
| 16 | MAP4                | 274.96 | 2.28                                  | placed          | HSA3 | 47.87 |
| 16 | PTHR1               | 310.45 | 0.62                                  | placed          | HSA3 | 46.89 |
| 16 | LTF                 | 330.91 | 0.51                                  | placed          | HSA3 | 46.45 |
| 16 | CCRL2               | 339.69 | 3.16                                  | frame           | HSA3 | 46.42 |
| 16 | TMEM16K             | 352.33 | 0.86                                  | placed          | HSA3 | 43.38 |
| 16 | SLC6A20             | 361.14 | 2.29                                  | placed          | HSA3 | 45.77 |
| 16 | CTNNB1              | 374.42 | 3.16                                  | frame           | HSA3 | 41.22 |
| 16 | EIF1B               | 405.49 | 3.41                                  | placed          | HSA3 | 40.33 |
| 16 | TKY1131             | 413.22 | 1.84                                  | placed          | HSA3 | 38.9  |
| 16 | MLH1                | 420.95 | 4.78                                  | frame           | HSA3 | 37.01 |
| 16 | GOLGA4              | 428.99 | 3.84                                  | placed          | HSA3 | 37.26 |
| 16 | PDCD6IP             | 447.36 | 1.9                                   | frame           | HSA3 | 33.81 |
| 16 | LEX048              | 466.79 | 2.34                                  | placed          |      |       |
| 16 | RBMS3               | 476.04 | 1.11                                  | frame           | HSA3 | 29.30 |
| 16 | UMNe585             | 485.7  | 1.37                                  | placed          | HSA3 | 30.9  |
| 16 | DYNC1LI1            | 490.32 | 1.11                                  | frame           | HSA3 | 32.54 |
| 16 | TGFBR2              | 494.73 | 1.21                                  | placed          | HSA3 | 30.62 |
| 16 | TKY1032             | 503.55 | 2.35                                  | placed          |      |       |
| 16 | GLB1                | 512.73 | 3.27                                  | placed          | HSA3 | 33.01 |
| 16 | CRTAP               | 522.47 | 2.08                                  | frame           | HSA3 | 33.13 |
| 16 | TKY871              | ---    | [WNT5A -<br>TKT]                      | binned          |      |       |
| 16 | ARF4                | ---    | [TKY687 -                             | binned          | HSA3 | 57.53 |

|    |           |        |                           |                 |      |        |
|----|-----------|--------|---------------------------|-----------------|------|--------|
|    |           |        | ARHGEF3]                  |                 |      |        |
| 16 | TKY388    | ---    | [TKY687 - ARHGEF3]        | binned          | HSA3 | 44.3   |
| 16 | UM042     | ---    | [IHPK2 - CTNNB1]          | binned          |      |        |
| 16 | ABHD5     | ---    | [IHPK2 - CTNNB1]          | binned          | HSA3 | 43.71  |
| 16 | TKY667    | ---    | [CACNA1D - WDR51A]        | binned          |      |        |
| 16 | CISH      | ---    | [WDR51A - TKY1069]        | binned          | HSA3 | 50.62  |
| 16 | ACY1      | ---    | [WDR51A - TKY1069]        | binned          | HSA3 | 51.99  |
| 16 | UQCRC1    | ---    | [IFRD2 - IHPK2]           | binned          | HSA3 | 48.61  |
| 16 | UMNe566   | ---    | [PDCD6IP - CRTAP]         | binned          | HSA3 | 30.7   |
| 16 | UMNe264   | ---    | [CTNNB1 - PDCD6IP]        | binned          | HSA3 | 35.1   |
| 16 | RPSA      | ---    | [CTNNB1 - PDCD6IP]        | binned          | HSA3 | 39.42  |
| 16 | ACAA1     | ---    | [CTNNB1 - PDCD6IP]        | binned          | HSA3 | 38.14  |
| 16 | ITGA9     | ---    | [CTNNB1 - PDCD6IP]        | binned          | HSA3 | 37.47  |
| 16 | TKY2022   | ---    | [CTNNB1 - PDCD6IP]        | binned          | HSA3 | 39.1   |
| 16 | TOP2B     | 0      | 0                         | frame           | HSA3 | 25.61  |
| 16 | AHT014    | ---    | [p-terminal - q-terminal] | binned          |      |        |
| 16 | RARB      | ---    | [p-terminal - q-terminal] | binned          | HSA3 | 25.44  |
| 16 | COR052    | ---    | [p-terminal - q-terminal] | binned          |      |        |
| 16 | TKY1930   | 0      | 3.54                      | frame           | HSA3 | 27.4   |
| 16 | VHL145    | 17.73  | 3.54                      | frame           |      |        |
| 16 | PCAF      | 36.46  | 5.65                      | frame           | HSA3 | 20.06  |
| 16 | TUDPEc039 | 58.63  | 1.34                      | placed          |      |        |
| 16 | SATB1     | 69.12  | 0.86                      | frame           | HSA3 | 18.36  |
| 16 | RFTN1     | 0      | 2.85                      | frame           | HSA3 | 16.33  |
| 16 | UMNe562   | 0      | 2.85                      | frame_identical | HSA3 | 16.9   |
| 16 | DAZL      | 5.18   | 0.56                      | placed          | HSA3 | 16.60  |
| 16 | UCDEQ505  | 32.6   | 0.64                      | placed          |      |        |
| 16 | TKY800    | 70.97  | 2.85                      | frame           |      |        |
| 16 | CDV3      | 134.79 | 2.38                      | placed          | HSA3 | 134.78 |
| 16 | TF        | 172.86 | 3.36                      | frame           | HSA3 | 134.95 |
| 16 | SLCO2A1   | 172.86 | 3.36                      | frame_identical | HSA3 | 135.13 |
| 16 | LEX056    | 190.51 | 3.36                      | frame           |      |        |
| 16 | TKY1149   | 209.04 | 0.49                      | placed          | HSA3 | 136.8  |
| 16 | TKY532    | 223.68 | 0.16                      | placed          | HSA3 | 136.1  |
| 16 | COR064    | 256.57 | 2                         | frame           | HSA3 | 136.0  |

|    |                |        |                           |                 |      |        |
|----|----------------|--------|---------------------------|-----------------|------|--------|
| 16 | TKY1086        | 278.57 | 2.96                      | frame           |      |        |
| 16 | I-18           | 288.37 | 1.02                      | placed          |      |        |
| 16 | STAG1          | 329.41 | 1.09                      | placed          | HSA3 | 137.54 |
| 16 | MPZ002         | 351.48 | 2.09                      | frame           |      |        |
| 16 | COPB2          | 366.17 | 2.09                      | frame           | HSA3 | 140.56 |
| 16 | 16STS01        | 379.49 | 5.67                      | frame           |      |        |
| 16 | PLOD2          | 413.62 | 5.45                      | frame           | HSA3 | 147.27 |
| 16 | TKY347         | 422.45 | 4.04                      | placed          | HSA3 | 148.0  |
| 16 | AHT060         | 436.36 | 4.96                      | frame           |      |        |
| 16 | NVHEQ216       | 445.63 | 2.61                      | placed          |      |        |
| 16 | TKY802         | 455.46 | 0.68                      | placed          |      |        |
| 16 | CP             | 465.29 | 4.96                      | frame           | HSA3 | 150.37 |
| 16 | TKY445         | 465.29 | 4.96                      | frame_identical |      |        |
| 16 | TKY341         | 465.29 | 4.96                      | frame_identical |      |        |
| 16 | TKY563         | 474.13 | 4                         | placed          |      |        |
| 16 | MBNL1          | 490.39 | 0.97                      | placed          | HSA3 | 153.50 |
| 16 | CH241-100I1_T7 | 494.01 | 2.39                      | frame           |      |        |
| 16 | AHT091         | 535.73 | 2.39                      | frame           |      |        |
| 16 | TKY936         | ---    | [MPZ002 - 16STS01]        | binned          |      |        |
| 16 | TKY406         | ---    | [MPZ002 - 16STS01]        | binned          |      |        |
| 16 | GYG1           | ---    | [AHT060 - CH241-100I1_T7] | binned          | HSA3 | 150.19 |

| Horse Chr. | Marker   | Map Position (cR) | Placement LOD | Assignment      | Human Chr. | Human Mb (Build 36.1) |
|------------|----------|-------------------|---------------|-----------------|------------|-----------------------|
| 17         | ZMYM2    | 0                 | 1.29          | frame           | HSA13      | 19.43                 |
| 17         | LATS2    | 9.02              | 1.29          | frame           | HSA13      | 20.45                 |
| 17         | UMNe521  | 9.02              | 1.29          | frame_identical | HSA13      | 20.3                  |
| 17         | EFHA1    | 11.94             | 0.29          | placed          | HSA13      | 20.96                 |
| 17         | RNF6     | 33.86             | 6.33          | frame           | HSA13      | 25.60                 |
| 17         | MTMR6    | 42.68             | 6.33          | frame           | HSA13      | 24.72                 |
| 17         | TKY796   | 42.68             | 6.33          | frame_identical | HSA13      | 25.4                  |
| 17         | COR105   | 42.68             | 6.33          | frame_identical |            |                       |
| 17         | TKY287   | 45.6              | 0.13          | placed          |            |                       |
| 17         | TKY373   | 48.46             | 0.24          | placed          |            |                       |
| 17         | SGCG     | 48.46             | 0.24          | placed          | HSA13      | 22.65                 |
| 17         | TKY1128  | 48.46             | 0.24          | placed          |            |                       |
| 17         | COR007   | 64.36             | 2.65          | placed          | HSA13      | 26.2                  |
| 17         | UMNe52   | 67.49             | 6.73          | frame           |            |                       |
| 17         | PAN3     | 76.95             | 6.73          | frame           | HSA13      | 27.65                 |
| 17         | FLT1     | 79.94             | 2.66          | placed          | HSA13      | 27.77                 |
| 17         | TKY328   | 88.82             | 0.19          | placed          |            |                       |
| 17         | UMNe384  | 104.49            | 3.98          | placed          | HSA13      | 28.2                  |
| 17         | LEX076   | 107.55            | 8.46          | frame           |            |                       |
| 17         | NVHEQ024 | 120.91            | 5.16          | frame           |            |                       |
| 17         | BRCA2    | 136.07            | 5.16          | frame           | HSA13      | 31.79                 |

|    |          |        |                              |                 |       |       |
|----|----------|--------|------------------------------|-----------------|-------|-------|
| 17 | POLR1D   | ---    | [MTMR6 -<br>PAN3]            | binned          | HSA13 | 27.09 |
| 17 | CRYL1    | ---    | [ZMYM2 -<br>RNF6]            | binned          | HSA13 | 19.88 |
| 17 | COR072   | ---    | [RNF6 -<br>UMNe52]           | binned          | HSA13 | 23.5  |
| 17 | AHT102   | ---    | [UMNe52 -<br>LEX076]         | binned          |       |       |
| 17 | STARD13  | 0      | 0                            | frame           | HSA13 | 32.58 |
| 17 | TKY102   | 6.61   | 0.26                         | placed          | HSA13 | 32.5  |
| 17 | TKY826   | 30.08  | 0                            | frame           |       |       |
| 17 | NBEA     | ---    | [p-terminal -<br>TKY826]     | binned          | HSA13 | 34.41 |
| 17 | EXOSC8   | 0      | 2.98                         | placed          | HSA13 | 36.47 |
| 17 | ALG5     | 0      | 2.68                         | placed          | HSA13 | 36.42 |
| 17 | SPG20    | 0      | 1.74                         | placed          | HSA13 | 35.77 |
| 17 | 17STS04  | 14.5   | 4.5                          | frame           |       |       |
| 17 | COG6     | 34.23  | 1.53                         | placed          | HSA13 | 39.13 |
| 17 | LHFP     | 45.64  | 4.07                         | placed          | HSA13 | 38.82 |
| 17 | THSD1    | 55.72  | 4.5                          | frame           | HSA13 | 51.85 |
| 17 | VPS36    | 55.72  | 4.5                          | frame_identical | HSA13 | 51.88 |
| 17 | 17STS02  | 55.72  | 4.5                          | frame_identical |       |       |
| 17 | CCDC70   | 85.81  | 2.64                         | frame           | HSA13 | 51.33 |
| 17 | NVHEQ079 | 99.05  | 2.4                          | placed          | HSA13 | 49.9  |
| 17 | TKY983   | 99.05  | 2.4                          | placed          | HSA13 | 50.1  |
| 17 | TKY969   | 99.05  | 2.4                          | placed          | HSA13 | 50.1  |
| 17 | TKY951   | 118.88 | 0.26                         | placed          | HSA13 | 49.6  |
| 17 | KPNA3    | 150.41 | 0.67                         | placed          | HSA13 | 49.17 |
| 17 | 17STS03  | 158.42 | 2.64                         | frame           |       |       |
| 17 | CYSLTR2  | 158.42 | 2.64                         | frame_identical | HSA13 | 48.18 |
| 17 | TKY2700  | 158.42 | 2.64                         | frame_identical | HSA13 | 48.4  |
| 17 | TRIM13   | 165.69 | 0.57                         | placed          | HSA13 | 49.47 |
| 17 | TKY103   | 189.38 | 1.86                         | placed          | HSA13 | 48.3  |
| 17 | LCP1     | 0      | 0                            | frame           | HSA13 | 45.60 |
| 17 | ESD      | 0      | 0                            | frame_identical | HSA13 | 46.24 |
| 17 | UMNe176  | 0      | 0                            | frame_identical |       |       |
| 17 | TKY1133  | 0      | 0                            | frame_identical |       |       |
| 17 | COR067   | 0      | 0                            | frame_identical | HSA13 | 45.8  |
| 17 | HTR2A    | ---    | [p-terminal -<br>q-terminal] | binned          | HSA13 | 46.31 |
| 17 | ITM2B    | ---    | [p-terminal -<br>q-terminal] | binned          | HSA13 | 47.71 |
| 17 | RB1      | ---    | [p-terminal -<br>q-terminal] | binned          | HSA13 | 47.78 |
| 17 | HMS41    | ---    | [p-terminal -<br>q-terminal] | binned          | HSA13 | 47.9  |
| 17 | WBP4     | 0      | 0.35                         | frame           | HSA13 | 40.53 |



|    |             |        |                          |                 |       |       |
|----|-------------|--------|--------------------------|-----------------|-------|-------|
| 17 | UCDEQ014    | 15.82  | 1.76                     | placed          |       |       |
| 17 | UMNe162/246 | 37.24  | 3.53                     | placed          |       |       |
| 17 | PCDH17      | 48.61  | 0.35                     | frame           | HSA13 | 57.10 |
| 17 | LOC144997   | 74.79  | 0.62                     | placed          |       |       |
| 17 | TKY3156     | 81.49  | 0.35                     | frame           | HSA13 | 60.2  |
| 17 | TKY825      | ---    | [p-terminal -<br>PCDH17] | binned          | HSA13 | 52.6  |
| 17 | TKY481      | ---    | [p-terminal -<br>PCDH17] | binned          | HSA13 | 40.9  |
| 17 | UMNe235     | 0      | 2.19                     | placed          | HSA13 | 66.3  |
| 17 | PCDH9       | 13.22  | 1.29                     | frame           | HSA13 | 65.77 |
| 17 | COR032      | 13.22  | 1.29                     | frame_identical | HSA13 | 66.5  |
| 17 | KLHL1       | 32.93  | 1.29                     | frame           | HSA13 | 69.17 |
| 17 | DACH1       | 46.15  | 4.27                     | placed          | HSA13 | 70.91 |
| 17 | KLF5        | 77.47  | 0.2                      | placed          | HSA13 | 72.53 |
| 17 | MYCBP2      | 108.8  | 0.2                      | placed          | HSA13 | 76.52 |
| 17 | CLN5        | 116.06 | 3.44                     | frame           | HSA13 | 76.46 |
| 17 | EDNRB       | 116.06 | 3.44                     | frame_identical | HSA13 | 77.37 |
| 17 | TBC1D4      | 123.31 | 2.25                     | placed          | HSA13 | 74.76 |
| 17 | VHL179      | 123.31 | 2.25                     | placed          |       |       |
| 17 | TKY893      | 136.54 | 1.99                     | placed          |       |       |
| 17 | TKY2549     | 148.83 | 2.12                     | frame           | HSA13 | 78.3  |
| 17 | TKY2347     | 175.07 | 2.12                     | frame           | HSA13 | 79.7  |
| 17 | TKY1102     | --     | [PCDH9 -<br>CLN5]        | binned          | HSA13 | 67.9  |
| 17 | KCTD12      | --     | [KLHL1 -<br>TKY2549]     | binned          | HSA13 | 76.35 |
| 17 | C13orf24    | --     | [KLHL1 -<br>TKY2549]     | binned          | HSA13 | 72.25 |
| 17 | KLF12       | --     | [KLHL1 -<br>TKY2549]     | binned          | HSA13 | 73.16 |
| 17 | TKY869      | --     | [KLHL1 -<br>TKY2549]     | binned          | HSA13 | 75.4  |
| 17 | UCHL3       | 0      | 1.97                     | frame           | HSA13 | 75.02 |
| 17 | LEX067      | 13.31  | 1.97                     | frame           |       |       |
| 17 | NDFIP2      | 23.66  | 1.28                     | placed          | HSA13 | 78.95 |
| 17 | RANBP5      | 29.52  | 1.24                     | placed          | HSA13 | 97.40 |
| 17 | TKY684      | 35.07  | 2.22                     | placed          | HSA13 | 96.7  |
| 17 | TKY2567     | 40.28  | 0.1                      | placed          | HSA13 | 96.6  |
| 17 | HMS25       | 65.66  | 0.12                     | placed          | HSA13 | 90.8  |
| 17 | DCT         | 78.39  | 1.45                     | frame           | HSA13 | 93.89 |
| 17 | TKY924      | 91.13  | 0.89                     | placed          |       |       |
| 17 | SLITRK6     | 91.13  | 0.87                     | placed          | HSA13 | 85.26 |
| 17 | GPC5        | 97.55  | 1.45                     | frame           | HSA13 | 90.85 |
| 17 | GPC6        | 103.95 | 1.56                     | placed          | HSA13 | 92.68 |
| 17 | TKY865      | 119.27 | 1.24                     | placed          |       |       |
| 17 | TKY379      | ---    | [LEX067 -<br>GPC5]       | binned          | HSA13 | 94.2  |

|    |             |        |                           |                 |       |        |
|----|-------------|--------|---------------------------|-----------------|-------|--------|
| 17 | RP11-477B16 | ---    | [LEX067 - GPC5]           | binned          |       |        |
| 17 | CLDN10      | ---    | [LEX067 - GPC5]           | binned          | HSA13 | 94.88  |
| 17 | DZIP1       | ---    | [LEX067 - GPC5]           | binned          | HSA13 | 95.03  |
| 17 | PHGDHL1     | 0      | 0                         | frame           | HSA13 | 98.65  |
| 17 | TKY546      | 0      | 0                         | frame_identical |       |        |
| 17 | TM9SF2      | 0      | 0                         | frame_identical | HSA13 | 98.95  |
| 17 | TKY1301     | ---    | [p-terminal - q-terminal] | binned          | HSA13 | 99.2   |
| 17 | BIVM        | 0      | 3.12                      | frame           | HSA13 | 102.25 |
| 17 | ITGBL1      | 20.8   | 2.06                      | placed          | HSA13 | 100.90 |
| 17 | C13orf27    | 26.38  | 3.3                       | frame           | HSA13 | 102.22 |
| 17 | FGF14       | 26.38  | 3.3                       | frame_identical | HSA13 | 101.17 |
| 17 | EFNB2       | 58.01  | 1.84                      | frame           | HSA13 | 105.94 |
| 17 | TKY792      | 69.91  | 2.04                      | placed          | HSA13 | 107.2  |
| 17 | TKY356      | 93.5   | 0.78                      | frame           |       |        |
| 17 | LIG4        | 117.09 | 0.78                      | frame           | HSA13 | 107.66 |
| 17 | TKY1071     | ---    | [C13orf27 - TKY356]       | binned          | HSA13 | 105    |
| 17 | TKY2597     | ---    | [C13orf27 - TKY356]       | binned          | HSA13 | 106.3  |
| 17 | FLJ10154    | ----   | [C13orf27 - TKY356]       | binned          | HSA13 | 105.99 |
| 17 | CDC16       | 0      | 0                         | frame           | HSA13 | 114.02 |
| 17 | CUL4A       | 4.66   | 1.47                      | placed          | HSA13 | 112.91 |
| 17 | LAMP1       | 9.09   | 3.07                      | placed          | HSA13 | 113.00 |
| 17 | F10         | 22.38  | 0                         | frame           | HSA13 | 112.83 |

| Horse Chr. | Marker           | Map Position (cR) | Placement LOD | Assignment | Human Chr. | Human Mb (Build 36.1) |
|------------|------------------|-------------------|---------------|------------|------------|-----------------------|
| 18         | BIN1             | 0                 | 1.41          | frame      | HSA2       | 127.52                |
| 18         | UCDEQ136         | 6.61              | 1.58          | placed     |            |                       |
| 18         | PROC             | 26.37             | 1.41          | frame      | HSA2       | 127.89                |
| 18         | AHT115           | 46.14             | 1.41          | frame      |            |                       |
| 18         | CLASP1           | 0                 | 2.56          | frame      | HSA2       | 121.81                |
| 18         | CH241-111C11_SP6 | 12.76             | 2.52          | placed     | HSA2       | 122                   |
| 18         | CH241-111C11_T7  | 12.76             | 2.52          | placed     | HSA2       | 122                   |
| 18         | TKY589           | 21.65             | 2.19          | frame      |            |                       |
| 18         | EPB41L5          | 34.42             | 2.19          | frame      | HSA2       | 120.49                |
| 18         | NVHEQ133         | 51.47             | 1.99          | frame      |            |                       |
| 18         | UMNe308          | 55.4              | 0.18          | placed     |            |                       |
| 18         | TKY1055          | 62.99             | 1.99          | frame      | HSA2       | 120.1                 |
| 18         | TUDPEc010        | 77.2              | 4.47          | frame      |            |                       |
| 18         | DDX18            | 91.93             | 4.47          | frame      | HSA2       | 118.29                |
| 18         | LEX016           | 107.23            | 4.74          | frame      | HSA2       | 116.1                 |
| 18         | ACTR3            | 137.72            | 3.92          | frame      | HSA2       | 114.36                |
| 18         | TKY449           | 148.04            | 2.41          | placed     | HSA2       | 133.3                 |

|    |          |        |                         |                 |      |        |
|----|----------|--------|-------------------------|-----------------|------|--------|
| 18 | LEX054   | 151.57 | 3.92                    | frame           |      |        |
| 18 | UMNe442  | 155.11 | 2.38                    | placed          | HSA2 | 134    |
| 18 | MGAT5    | 169.8  | 4.04                    | frame           | HSA2 | 134.73 |
| 18 | MCM6     | 207.49 | 0.76                    | placed          | HSA2 | 136.31 |
| 18 | CXCR4    | 230.93 | 1.21                    | frame           | HSA2 | 136.59 |
| 18 | NVHEQ077 | 252.25 | 2.96                    | frame           | HSA2 | 138.8  |
| 18 | UMNe097  | 256.02 | 2.55                    | placed          |      |        |
| 18 | KYNU     | 263.56 | 1.31                    | frame           | HSA2 | 143.35 |
| 18 | LRP1B    | 263.56 | 1.31                    | frame_identical | HSA2 | 140.71 |
| 18 | SGCV07   | 271.72 | 1.29                    | placed          |      |        |
| 18 | UMNe50   | 289.55 | 2.66                    | placed          | HSA2 | 140.2  |
| 18 | AHT080   | 298.06 | 1.31                    | frame           |      |        |
| 18 | ZEB2     | 327.75 | 2.28                    | frame           | HSA2 | 144.86 |
| 18 | TKY407   | ---    | [TUDPEc010<br>- LEX016] | binned          | HSA2 | 117.5  |
| 18 | UMNe263  | ---    | [ACTR3 -<br>MGAT5]      | binned          |      |        |
| 18 | HMS46    | ---    | [NVHEQ077<br>- AHT080]  | binned          | HSA2 | 144    |
| 18 | TKY909   | ---    | [NVHEQ077<br>- AHT080]  | binned          | HSA2 | 144.4  |
| 18 | UMNe095  | ---    | [NVHEQ077<br>- AHT080]  | binned          |      |        |
| 18 | ORC4L    | 0      | 0.87                    | frame           | HSA2 | 148.41 |
| 18 | UMNe114  | 9.87   | 0.97                    | placed          |      |        |
| 18 | TKY426   | 19.82  | 0.87                    | frame           | HSA2 | 149.7  |
| 18 | NEB      | 35.62  | 1.19                    | placed          | HSA2 | 152.05 |
| 18 | TNFAIP6  | 40.56  | 4.23                    | frame           | HSA2 | 151.92 |
| 18 | PRPF40A  | 57.14  | 1.13                    | placed          | HSA2 | 153.22 |
| 18 | COR096   | 79.23  | 2.37                    | frame           | HSA2 | 156.7  |
| 18 | KIF5C    | 92.62  | 2.37                    | frame           | HSA2 | 149.51 |
| 18 | PSCDBP   | 110.45 | 1.84                    | frame           | HSA2 | 157.98 |
| 18 | ACVR1    | 110.45 | 1.84                    | frame_identical | HSA2 | 158.30 |
| 18 | HTG28    | 110.45 | 1.84                    | frame_identical |      |        |
| 18 | TKY608   | 114.72 | 1.1                     | placed          |      |        |
| 18 | BAZ2B    | 133.51 | 1.22                    | frame           | HSA2 | 159.88 |
| 18 | DPP4     | 158.45 | 0.74                    | placed          | HSA2 | 162.56 |
| 18 | PSMD14   | 173.69 | 0.29                    | placed          | HSA2 | 161.87 |
| 18 | GCG      | 183.26 | 1.22                    | frame           | HSA2 | 162.71 |
| 18 | TANK     | 192.19 | 0.57                    | placed          | HSA2 | 161.70 |
| 18 | GCA      | 206.25 | 2.25                    | placed          | HSA2 | 162.91 |
| 18 | UMNe505  | 227.17 | 0.14                    | placed          | HSA2 | 164.3  |
| 18 | TKY545   | 232.13 | 3.57                    | frame           |      |        |
| 18 | GRB14    | 248.78 | 0.22                    | placed          | HSA2 | 165.06 |
| 18 | LRP2     | 293.48 | 1.83                    | placed          | HSA2 | 169.69 |
| 18 | SSB      | 302.86 | 1.93                    | frame           | HSA2 | 170.36 |
| 18 | GAD1     | 311.94 | 0.15                    | placed          | HSA2 | 171.38 |
| 18 | TKY1913  | 316.3  | 1.93                    | frame           |      |        |
| 18 | DYNC1I2  | 347.78 | 0.22                    | placed          | HSA2 | 172.25 |
| 18 | PDK1     | 357.68 | 2.11                    | frame           | HSA2 | 173.13 |
| 18 | TKY741   | 362.16 | 0.16                    | placed          |      |        |

|    |             |        |                   |                 |      |        |
|----|-------------|--------|-------------------|-----------------|------|--------|
| 18 | CHRNA1      | 371.09 | 2.11              | frame           | HSA2 | 175.32 |
| 18 | TKY322      | 371.09 | 2.11              | frame_identical | HSA2 | 176.3  |
| 18 | 18STS01     | 397.2  | 4.02              | frame           |      |        |
| 18 | NFE2L2      | 429.3  | 3.25              | frame           | HSA2 | 177.80 |
| 18 | UMNe180     | 441.26 | 2.3               | placed          | HSA2 | 177.8  |
| 18 | HOXD10      | 447.18 | 3.15              | frame           | HSA2 | 176.69 |
| 18 | CH241-101P3 | 488.62 | 5.25              | frame           | HSA2 | 195.3  |
| 18 | TKY943      | 499.78 | 2.41              | placed          | HSA2 | 196.2  |
| 18 | SF3B1       | 511.81 | 5.25              | frame           | HSA2 | 197.96 |
| 18 | HSPD1       | 534.19 | 2.94              | frame           | HSA2 | 198.06 |
| 18 | HLM3        | 549.03 | 2.14              | placed          |      |        |
| 18 | UCDEQ387    | 553.73 | 0.23              | placed          |      |        |
| 18 | HMS75       | 567.18 | 1.15              | placed          |      |        |
| 18 | AOX1        | 575.4  | 2.94              | frame           | HSA2 | 201.16 |
| 18 | BZW1        | 583.91 | 1.41              | placed          | HSA2 | 201.38 |
| 18 | TKY1008     | 616.76 | 4.28              | frame           | HSA2 | 202.7  |
| 18 | WDR12       | 630.23 | 0.87              | placed          | HSA2 | 203.45 |
| 18 | CD28        | 644.31 | 3.68              | frame           | HSA2 | 204.28 |
| 18 | UMNe243     | 660.63 | 3.68              | frame           | HSA2 | 205    |
| 18 | TKY1260     | 669.18 | 2.3               | placed          | HSA2 | 205.2  |
| 18 | FASTKD2     | 703.77 | 1.58              | frame           | HSA2 | 207.34 |
| 18 | IDH1        | 725.05 | 1.58              | frame           | HSA2 | 208.81 |
| 18 | GDF8        | 796.09 | 2.68              | frame           | HSA2 | 190.63 |
| 18 | TKY017      | 801.65 | 1.53              | placed          | HSA2 | 191.1  |
| 18 | MYO1B       | 811.61 | 2.38              | frame           | HSA2 | 191.82 |
| 18 | COL3A1      | 826.48 | 1.23              | placed          | HSA2 | 189.55 |
| 18 | TFPI        | 831.2  | 2.22              | frame           | HSA2 | 188.04 |
| 18 | ITGAV       | 835.93 | 2.6               | placed          | HSA2 | 187.16 |
| 18 | UMNe501     | 835.93 | 1.2               | placed          | HSA2 | 187.3  |
| 18 | TKY101      | 835.93 | 1.2               | placed          |      |        |
| 18 | FRZB        | 850.71 | 2.22              | frame           | HSA2 | 183.41 |
| 18 | ITGA4       | 861.22 | 3.23              | placed          | HSA2 | 182.03 |
| 18 | SSFA2       | 871.67 | 3.29              | frame           | HSA2 | 182.46 |
| 18 | NMI         | ---    | [TKY426 - COR096] | binned          | HSA2 | 151.84 |
| 18 | UMNe307     | ---    | [ORC4L - TNFAIP6] | binned          |      |        |
| 18 | TKY303      | ---    | [ORC4L - TNFAIP6] | binned          | HSA2 | 149.1  |
| 18 | NR4A2       | ---    | [COR096 - PSCDBP] | binned          | HSA2 | 156.89 |
| 18 | UMNe089     | ---    | [TNFAIP6 - KIF5C] | binned          |      |        |
| 18 | TKY692      | ---    | [TNFAIP6 - KIF5C] | binned          | HSA2 | 156.3  |
| 18 | ATF2        | ---    | [PDK1 - 18STS01]  | binned          | HSA2 | 175.65 |
| 18 | TKY016      | ---    | [GDF8 - TFPI]     | binned          | HSA2 | 191.1  |
| 18 | EEF1B2      | ---    | [UMNe243 - IDH1]  | binned          | HSA2 | 206.73 |

|    |        |     |                  |        |      |        |
|----|--------|-----|------------------|--------|------|--------|
| 18 | NDUFS1 | --- | [UMNe243 - IDH1] | binned | HSA2 | 206.70 |
|----|--------|-----|------------------|--------|------|--------|

| Horse Chr. | Marker          | Map Position (cR) | Placement LOD | Assignment      | Human Chr. | Human Mb (Build 36.1) |
|------------|-----------------|-------------------|---------------|-----------------|------------|-----------------------|
| 19         | AHT094          | 0                 | 6.49          | frame           | HSA3       | 157.3                 |
| 19         | AHT041          | 19.28             | 6.07          | frame           | HSA3       | 157.3                 |
| 19         | UMNe440         | 32.77             | 0.77          | frame           |            |                       |
| 19         | TKY510          | 48.78             | 0.77          | frame           |            |                       |
| 19         | B3GALNT1        | 62.32             | 1.02          | placed          | HSA3       | 162.2                 |
| 19         | UMNe325         | 101.71            | 0.54          | placed          |            |                       |
| 19         | VHL011          | 123.67            | 1.84          | placed          |            |                       |
| 19         | BCHE            | 195.3             | 1.82          | frame           | HSA3       | 166.97                |
| 19         | UMNe106         | 208.96            | 1.82          | frame           |            |                       |
| 19         | UMNe351         | 243.48            | 0.8           | placed          |            |                       |
| 19         | AHT106          | 268.82            | 0.56          | frame           |            |                       |
| 19         | MPZ003          | 277.91            | 0.56          | frame           |            |                       |
| 19         | UMNe599         | 277.91            | 0.56          | frame_identical |            |                       |
| 19         | UMNe221         | 277.91            | 0.56          | frame_identical |            |                       |
| 19         | HTG23           | 286.99            | 2.93          | frame           |            |                       |
| 19         | TKY448          | 299.44            | 2.36          | placed          | HSA3       | 170.8                 |
| 19         | MYNN            | 305.79            | 2.41          | frame           | HSA3       | 170.97                |
| 19         | TLOC1           | 312.52            | 0.67          | placed          | HSA3       | 171.17                |
| 19         | 19STS01         | 326.03            | 2.41          | frame           |            |                       |
| 19         | TKY419          | 346.39            | 1.12          | placed          | HSA3       | 171.6                 |
| 19         | AHT052          | 381.48            | 0.41          | placed          | HSA3       | 170.8                 |
| 19         | TKY738          | 415.35            | 6.76          | frame           |            |                       |
| 19         | TKY713          | 436.32            | 5.96          | frame           | HSA3       | 174.3                 |
| 19         | TBL1XR1         | 455.6             | 5.96          | frame           | HSA3       | 178.22                |
| 19         | HTG24           | 468.62            | 2.49          | placed          |            |                       |
| 19         | LEX040          | 477.28            | 0.12          | placed          | HSA3       | 181.5                 |
| 19         | FXR1            | 481.28            | 2.19          | frame           | HSA3       | 182.11                |
| 19         | CH241-100C11_T7 | 493.82            | 2.02          | placed          | HSA3       | 185.1                 |
| 19         | ABCF3           | 502.12            | 2.19          | frame           | HSA3       | 185.39                |
| 19         | BCL6            | 522.98            | 1.78          | frame           | HSA3       | 188.92                |
| 19         | LEX035          | 534.09            | 1.28          | frame           |            |                       |
| 19         | AHSG            | 554.11            | 2.36          | frame           | HSA3       | 187.81                |
| 19         | HRG             | 566.08            | 2.53          | placed          | HSA3       | 187.87                |
| 19         | KNG1            | 574.04            | 2.72          | frame           | HSA3       | 187.92                |
| 19         | HRASLS          | 639.37            | 4.74          | frame           | HSA3       | 194.44                |
| 19         | UMNe098         | 666.86            | 1.48          | frame           |            |                       |
| 19         | TKY372          | 677.6             | 0.38          | placed          | HSA3       | 195.3                 |
| 19         | HES1            | 681.06            | 1.48          | frame           | HSA3       | 195.34                |
| 19         | IL1RAP          | 716.18            | 4.56          | frame           | HSA3       | 191.71                |
| 19         | TKY679          | 750.75            | 2.03          | frame           |            |                       |
| 19         | PARP15          | 781.61            | 1.92          | frame           | HSA3       | 123.82                |
| 19         | CASR            | 791.69            | 0.35          | placed          | HSA3       | 123.39                |
| 19         | TKY686          | 791.69            | 0.35          | placed          | HSA3       | 124.5                 |

|    |                     |         |                          |                 |      |        |
|----|---------------------|---------|--------------------------|-----------------|------|--------|
| 19 | SNX4                | 801.24  | 1.92                     | frame           | HSA3 | 126.65 |
| 19 | UMPS                | 801.24  | 1.92                     | frame_identical | HSA3 | 125.93 |
| 19 | COR044              | 801.24  | 1.92                     | frame_identical |      |        |
| 19 | TKY730              | 809.9   | 0.13                     | placed          | HSA3 | 125.4  |
| 19 | TKY1132             | 829.19  | 2.06                     | placed          | HSA3 | 125.2  |
| 19 | HMS08               | 865.11  | 0.21                     | placed          | HSA3 | 118.7  |
| 19 | UMNe083             | 873.41  | 5.97                     | frame           | HSA3 | 119.4  |
| 19 | ASB25               | 877.74  | 2.24                     | placed          | HSA3 | 116.9  |
| 19 | ATP6V1A             | 890.76  | 5.97                     | frame           | HSA3 | 114.95 |
| 19 | COR092              | 898.47  | 1.51                     | placed          | HSA3 | 112.9  |
| 19 | CCDC80              | 906.18  | 4.27                     | frame           | HSA3 | 113.81 |
| 19 | ZuBeEq9             | 929.37  | 0.12                     | placed          | HSA3 | 112.5  |
| 19 | TKY817              | 947.97  | 4.51                     | placed          |      |        |
| 19 | CH241-<br>100N17_T7 | 955.68  | 1.06                     | placed          | HSA3 | 108.6  |
| 19 | UMNe500             | 963.12  | 3.91                     | frame           | HSA3 | 110.9  |
| 19 | TKY009              | 970.04  | 2.52                     | placed          |      |        |
| 19 | ASB11               | 973.39  | 2.82                     | placed          | HSA3 | 113.7  |
| 19 | UMNe592             | 991.99  | 1.68                     | placed          | HSA3 | 113.9  |
| 19 | ABHD10              | 1018.17 | 3.91                     | frame           | HSA3 | 113.18 |
| 19 | DCBLD2              | 1039.14 | 2.2                      | frame           | HSA3 | 100.00 |
| 19 | TBC1D23             | 1045.89 | 0.19                     | placed          | HSA3 | 101.46 |
| 19 | FILIP1L             | 1056.36 | 2.2                      | frame           | HSA3 | 101.03 |
| 19 | TKY1038             | 1067.47 | 2.44                     | placed          | HSA3 | 101.8  |
| 19 | CPOX                | 1071.3  | 2.87                     | frame           | HSA3 | 99.78  |
| 19 | ZBTB11              | 1074.99 | 2.47                     | placed          | HSA3 | 102.85 |
| 19 | AHT055              | 1086.1  | 1.35                     | frame           |      |        |
| 19 | UMNe590             | 1101.58 | 1.35                     | frame           |      |        |
| 19 | PROS1               | 1188.09 | 0.75                     | frame           | HSA3 | 95.07  |
| 19 | UMNe324             | 1194.85 | 2.5                      | placed          |      |        |
| 19 | TKY783              | 1202.04 | 0.75                     | frame           |      |        |
| 19 | SCHIP1              | ---     | [p-terminal -<br>AHT041] | binned          | HSA3 | 160.47 |
| 19 | LEX073              | ---     | [LEX035 -<br>KNG1]       | binned          | HSA3 | 187.4  |
| 19 | LEX036              | ---     | [TBL1XR1 -<br>ABCF3]     | binned          | HSA3 | 179.7  |
| 19 | ZMAT3               | ---     | [TBL1XR1 -<br>ABCF3]     | binned          | HSA3 | 180.22 |
| 19 | UMNe319             | ---     | [TBL1XR1 -<br>ABCF3]     | binned          | HSA3 | 183.4  |
| 19 | TKY606              | ---     | [TBL1XR1 -<br>ABCF3]     | binned          |      |        |
| 19 | NAALADL2            | ---     | [TKY713 -<br>FXR1]       | binned          | HSA3 | 176.06 |
| 19 | ASB07               | ---     | [MYNN -<br>TKY738]       | binned          | HSA3 | 171.6  |
| 19 | NVHEQ011            | ---     | [UMNe083 -<br>CCDC80]    | binned          |      |        |
| 19 | TKY992              | ---     | [CCDC80 -<br>ABHD10]     | binned          | HSA3 | 107.1  |
| 19 | TKY444              | ---     | [CCDC80 -<br>ABHD10]     | binned          |      |        |

|    |         |     |                    |        |      |        |
|----|---------|-----|--------------------|--------|------|--------|
| 19 | UMNe071 | --- | [HRASLS - HES1]    | binned | HSA3 | 194    |
| 19 | TKY422  | --- | [UMNe098 - IL1RAP] | binned | HSA3 | 195.1  |
| 19 | IQCG    | --- | [PARP15 - UMNe083] | binned | HSA3 | 199.1  |
| 19 | TKY004  | --- | [PARP15 - UMNe083] | binned |      |        |
| 19 | ZNF148  | --- | [PARP15 - UMNe083] | binned | HSA3 | 126.43 |
| 19 | LAMP3   | --- | [FXR1 - BCL6]      | binned | HSA3 | 184.32 |
| 19 | ABCC5   | --- | [FXR1 - BCL6]      | binned | HSA3 | 185.12 |
| 19 | TKY538  | --- | [TKY679 - SNX4]    | binned | HSA3 | 124.1  |

| <b>Horse Chr.</b> | <b>Marker</b>   | <b>Map Position (cR)</b> | <b>Placement LOD</b> | <b>Assignment</b> | <b>Human Chr.</b> | <b>Human Mb (Build 36.1)</b> |
|-------------------|-----------------|--------------------------|----------------------|-------------------|-------------------|------------------------------|
| 20                | EXOC2           | 0                        | 7.17                 | frame             | HSA6              | 0.43                         |
| 20                | UMNe274         | 14                       | 0.39                 | placed            |                   |                              |
| 20                | WRNIP1          | 47.76                    | 2.13                 | placed            | HSA6              | 2.71                         |
| 20                | SERPINB1        | 51.51                    | 4.44                 | frame             | HSA6              | 2.78                         |
| 20                | SERPINB9        | 51.51                    | 4.44                 | frame_identical   | HSA6              | 2.83                         |
| 20                | CH241-101E21_T7 | 63.16                    | 4.44                 | frame             | HSA6              | 3.6                          |
| 20                | CH241-102A12_T7 | 89.74                    | 4.26                 | placed            | HSA6              | 5.4                          |
| 20                | NRN1            | 98.22                    | 1.71                 | frame             | HSA6              | 5.94                         |
| 20                | UMNe418         | 111.44                   | 1.71                 | frame             | HSA6              | 6.5                          |
| 20                | SSR1            | 131.93                   | 2.09                 | placed            | HSA6              | 7.23                         |
| 20                | BMP6            | 141.22                   | 3.36                 | frame             | HSA6              | 7.67                         |
| 20                | NVHEQ005        | 168.96                   | 4.08                 | placed            |                   |                              |
| 20                | AHT018          | 168.96                   | 2.98                 | placed            |                   |                              |
| 20                | EDN1            | 173.17                   | 1.68                 | frame             | HSA6              | 12.40                        |
| 20                | TKY1517         | 173.17                   | 1.68                 | frame_identical   | HSA6              | 10.5                         |
| 20                | UMNe064         | 173.17                   | 1.68                 | frame_identical   |                   |                              |
| 20                | TKY1798         | 177.23                   | 0.87                 | placed            | HSA6              | 11.4                         |
| 20                | NOL7            | 193.39                   | 1.68                 | frame             | HSA6              | 13.72                        |
| 20                | COR029          | 224.25                   | 3.46                 | frame             | HSA6              | 13.6                         |
| 20                | TKY912          | 249.99                   | 3.22                 | frame             |                   |                              |
| 20                | UMNe067         | 281.05                   | 0.13                 | placed            | HSA6              | 14.3                         |
| 20                | LEX052          | 285.11                   | 2.2                  | frame             | HSA6              | 14.2                         |
| 20                | UMNe119         | 289.34                   | 1.88                 | placed            | HSA6              | 14.3                         |
| 20                | GMPR            | 307.78                   | 4.99                 | frame             | HSA6              | 16.35                        |
| 20                | LEX064          | 307.78                   | 4.99                 | frame_identical   |                   |                              |
| 20                | KIF13A          | 325.4                    | 4.02                 | frame             | HSA6              | 17.87                        |
| 20                | NUP153          | 343.9                    | 4.02                 | frame             | HSA6              | 17.72                        |
| 20                | UMNe304         | 384.86                   | 3.87                 | frame             |                   |                              |
| 20                | PRL             | 401.3                    | 3.87                 | frame             | HSA6              | 22.40                        |
| 20                | TKY3403         | 401.3                    | 3.87                 | frame_identical   | HSA6              | 22.1                         |

|    |                  |         |      |                 |      |       |
|----|------------------|---------|------|-----------------|------|-------|
| 20 | AHT109           | 411.05  | 0.13 | placed          | HSA6 | 19.4  |
| 20 | UMNe272          | 440.26  | 2.15 | frame           |      |       |
| 20 | CMAH             | 457.11  | 2.15 | frame           | HSA6 | 25.19 |
| 20 | SLC17A2          | 473.96  | 3.52 | frame           | HSA6 | 26.02 |
| 20 | ABT1             | 501.7   | 5.44 | frame           | HSA6 | 26.71 |
| 20 | TRIM27           | 532.59  | 5.44 | frame           | HSA6 | 28.98 |
| 20 | UMNe056          | 563.47  | 0.22 | placed          |      |       |
| 20 | UMNe094          | 577.35  | 0.14 | placed          |      |       |
| 20 | CH241-102G5_SP6  | 581.99  | 3.98 | frame           | HSA6 | 30.1  |
| 20 | ELA-A            | 591.25  | 2.08 | placed          | HSA6 | 29.9  |
| 20 | TKY694           | 600.51  | 2.46 | placed          | HSA6 | 31.6  |
| 20 | CH241-100F12_SP6 | 600.51  | 2.45 | placed          | HSA6 | 31.6  |
| 20 | TNF              | 605.17  | 2.1  | frame           | HSA6 | 31.65 |
| 20 | MSH5             | 605.17  | 2.1  | frame_identical | HSA6 | 31.82 |
| 20 | UMNe214          | 605.17  | 2.1  | frame_identical |      |       |
| 20 | UM011            | 609.8   | 1.25 | placed          | HSA6 | 33    |
| 20 | ELA-DOB          | 624.51  | 0.57 | placed          | HSA6 | 32.8  |
| 20 | ELA-DQA          | 648.2   | 1.62 | frame           | HSA6 | 32.7  |
| 20 | TKY008           | 679.89  | 1.94 | placed          |      |       |
| 20 | ELA-DMA          | 707.41  | 1.62 | frame           | HSA6 | 33    |
| 20 | PHF1             | 738.23  | 3.31 | frame           | HSA6 | 33.49 |
| 20 | UMNe480          | 747.06  | 2.11 | placed          | HSA6 | 34    |
| 20 | TKY2503          | 756.32  | 2.85 | placed          | HSA6 | 34.5  |
| 20 | PACSIN1          | 765.58  | 5.05 | frame           | HSA6 | 34.54 |
| 20 | CH241-100D3_SP6  | 809.62  | 4.67 | frame           | HSA6 | 38.5  |
| 20 | TKY821           | 814.24  | 0.37 | placed          | HSA6 | 40.3  |
| 20 | CH241-100D3_T7   | 829.61  | 3.93 | placed          | HSA6 | 38.3  |
| 20 | PIM1             | 839.31  | 1.78 | frame           | HSA6 | 37.25 |
| 20 | FKBP5            | 853.19  | 1.78 | frame           | HSA6 | 35.65 |
| 20 | SRPK1            | 857.82  | 2.44 | placed          | HSA6 | 35.91 |
| 20 | UM013            | 873.29  | 2.85 | frame           |      |       |
| 20 | TKY273           | 927.91  | 0.18 | placed          | HSA6 | 46.2  |
| 20 | RUNX2            | 938.19  | 1.23 | frame           | HSA6 | 45.40 |
| 20 | TKY507           | 947.45  | 2.62 | placed          | HSA6 | 46.2  |
| 20 | CH241-103M18_T7  | 952.11  | 2.33 | placed          | HSA6 | 46.3  |
| 20 | TNFRSF21         | 961.35  | 1.23 | frame           | HSA6 | 47.31 |
| 20 | TKY1116          | 978.96  | 4.44 | frame           |      |       |
| 20 | CRISP2           | 991.59  | 1.18 | frame           | HSA6 | 49.77 |
| 20 | MUT              | 1003.7  | 1.18 | frame           | HSA6 | 49.51 |
| 20 | HSP90AB1         | 1040.91 | 3.83 | frame           | HSA6 | 44.32 |
| 20 | UMNe456          | 1065.26 | 2.17 | placed          |      |       |
| 20 | TKY539           | 1069.67 | 2.26 | placed          |      |       |
| 20 | CH241-101H13_SP6 | 1073.89 | 1.98 | frame           | HSA6 | 41.1  |
| 20 | TKY547           | 1082.71 | 0.34 | placed          | HSA6 | 41.5  |
| 20 | TKY1405          | 1087.15 | 3.19 | placed          | HSA6 | 41.8  |
| 20 | CCND3            | 1095.96 | 1.98 | frame           | HSA6 | 42.01 |



|    |                     |         |                                    |                 |      |       |
|----|---------------------|---------|------------------------------------|-----------------|------|-------|
| 20 | UBR2                | 1109.84 | 2.42                               | placed          | HSA6 | 42.64 |
| 20 | VEGF                | 1119.59 | 1.88                               | placed          | HSA6 | 43.85 |
| 20 | TKY925              | 1119.59 | 1.88                               | placed          |      |       |
| 20 | PRPH2               | 1129.91 | 3.78                               | frame           | HSA6 | 42.77 |
| 20 | TKY995              | 1159.17 | 4.3                                | frame           | HSA6 | 53.2  |
| 20 | GSTA1               | 1178.65 | 2.2                                | frame           | HSA6 | 52.76 |
| 20 | ICK                 | 1178.65 | 2.2                                | frame_identical | HSA6 | 52.97 |
| 20 | GCLC                | 1182.87 | 2.48                               | placed          | HSA6 | 53.47 |
| 20 | UMNe428             | 1192.13 | 2.2                                | frame           | HSA6 | 55.6  |
| 20 | HMS04               | 1212.74 | 2.2                                | frame           | HSA6 | 56.3  |
| 20 | TKY848              | ---     | [COR029 -<br>LEX052]               | binned          |      |       |
| 20 | AHT111              | ---     | [TNF – ELA-<br>DMA]                | binned          |      |       |
| 20 | ITPR3               | ---     | [ELA-DMA -<br>PACSIN1]             | binned          | HSA6 | 33.70 |
| 20 | TKY1115             | ---     | [PHF1 -<br>CH241-<br>100D3_SP6]    | binned          | HSA6 | 34.7  |
| 20 | 20STS01             | ---     | [TRIM27 -<br>TNF]                  | binned          |      |       |
| 20 | UMNe225             | ---     | [CH241-<br>102G5_SP6 –<br>ELA-DQA] | binned          |      |       |
| 20 | UMNe065             | ---     | [CH241-<br>102G5_SP6 –<br>ELA-DQA] | binned          | HSA6 | 31.7  |
| 20 | BAT3                | ---     | [CH241-<br>102G5_SP6 –<br>ELA-DQA] | binned          | HSA6 | 31.71 |
| 20 | HSPA1A              | ---     | [CH241-<br>102G5_SP6 –<br>ELA-DQA] | binned          | HSA6 | 31.89 |
| 20 | UMNe170             | ---     | [CH241-<br>102G5_SP6 –<br>ELA-DQA] | binned          | HSA6 | 33    |
| 20 | TKY2230             | ---     | [SERPINB1 -<br>NRN1]               | binned          | HSA6 | 3.4   |
| 20 | BPHL                | ---     | [EXOC2 -<br>CH241-<br>101E21_T7]   | binned          | HSA6 | 3.06  |
| 20 | LEX011              | ---     | [CMAH -<br>ABT1]                   | binned          | HSA6 | 26    |
| 20 | C6orf62             | ---     | [UMNe272 -<br>SLC17A2]             | binned          | HSA6 | 24.81 |
| 20 | GPLD1               | ---     | [UMNe272 -<br>SLC17A2]             | binned          | HSA6 | 24.54 |
| 20 | CH241-<br>101K12_T7 | ---     | [PRL -<br>CMAH]                    | binned          | HSA6 | 23.7  |
| 20 | UMNe341             | ---     | [GMPR -<br>NUP153]                 | binned          | HSA6 | 17.4  |
| 20 | TKY1040             | ---     | [UMNe304 -<br>UMNe272]             | binned          |      |       |
| 20 | HTG05               | ---     | [BMP6 -<br>NOL7]                   | binned          |      |       |

|    |                     |        |                                       |        |      |       |
|----|---------------------|--------|---------------------------------------|--------|------|-------|
| 20 | UMNe380             | ---    | [BMP6 -<br>NOL7]                      | binned | HSA6 | 11.7  |
| 20 | TFAP2A              | ---    | [BMP6 -<br>NOL7]                      | binned | HSA6 | 10.50 |
| 20 | UMNe301             | ---    | [BMP6 -<br>NOL7]                      | binned | HSA6 | 10.3  |
| 20 | TKY1024             | ---    | [UMNe428 -<br>q-terminal]             | binned |      |       |
| 20 | CRISP3              | ---    | [TKY1116 -<br>MUT]                    | binned | HSA6 | 49.80 |
| 20 | CH241-<br>100H23_T7 | ---    | [TKY1116 -<br>MUT]                    | binned | HSA6 | 49.1  |
| 20 | CRISP1              | ---    | [TKY1116 -<br>MUT]                    | binned | HSA6 | 49.91 |
| 20 | UMNe151             | ---    | [TKY1116 -<br>MUT]                    | binned | HSA6 | 51.3  |
| 20 | TKY2258             | ---    | [TKY1116 -<br>MUT]                    | binned | HSA6 | 50.7  |
| 20 | TKY1070             | ---    | [TKY995 -<br>UMNe428]                 | binned |      |       |
| 20 | CLPS                | ---    | [PIM1 -<br>UM013]                     | binned | HSA6 | 35.87 |
| 20 | TREM1               | ---    | [HSP90AB1 -<br>CCND3]                 | binned | HSA6 | 41.35 |
| 20 | UMNe494             | ---    | [MUT -<br>CH241-<br>101H13_SP6]       | binned | HSA6 | 44.1  |
| 20 | TKY477              | ---    | [CH241-<br>101H13_SP6<br>- PRPH2]     | binned | HSA6 | 42.1  |
| 20 | KCNK16              | ---    | [PACSN1 -<br>PIM1]                    | binned | HSA6 | 39.39 |
| 20 | TKY666              | ---    | [SLC17A2 -<br>TRIM27]                 | binned | HSA6 | 26.4  |
| 20 | TKY940              | ---    | [SLC17A2 -<br>TRIM27]                 | binned | HSA6 | 25.9  |
| 20 | CH241-<br>102E20_T7 | 0      | 3.01                                  | frame  | HSA6 | 58.6  |
| 20 | UMNe484             | 8.33   | 2.14                                  | placed |      |       |
| 20 | COR050              | 8.33   | 2.14                                  | placed |      |       |
| 20 | CH241-<br>102I4_SP6 | 42.08  | 5.95                                  | frame  | HSA6 | 65.7  |
| 20 | LEX071/072          | 56.47  | 2.39                                  | placed |      |       |
| 20 | TKY649              | 56.47  | 2.38                                  | placed |      |       |
| 20 | COL19A1             | 59.94  | 5.95                                  | frame  | HSA6 | 70.63 |
| 20 | TKY321              | 63.32  | 2.39                                  | placed |      |       |
| 20 | COL9A1              | 70.54  | 0.29                                  | placed | HSA6 | 70.98 |
| 20 | NVHEQ021            | 80.99  | 6.57                                  | frame  |      |       |
| 20 | HMS42               | 108.26 | 7.28                                  | frame  |      |       |
| 20 | CH241-<br>101N2_SP6 | ---    | [p-terminal -<br>CH241-<br>102I4_SP6] | binned | HSA6 | 62.7  |

| Horse | Marker | Map | Placement | Assignment | Human | Human |
|-------|--------|-----|-----------|------------|-------|-------|
|-------|--------|-----|-----------|------------|-------|-------|

| Chr. |           | Position<br>(cR) | LOD                        |                 | Chr.  | Mb (Build<br>36.1) |
|------|-----------|------------------|----------------------------|-----------------|-------|--------------------|
| 21   | TKY021    | 0                | 2.29                       | placed          |       |                    |
| 21   | AKAP8     | 13.94            | 2.08                       | frame           | HSA19 | 15.33              |
| 21   | KLF2      | 29.14            | 2.08                       | frame           | HSA19 | 16.30              |
| 21   | SGCV14    | 29.14            | 2.08                       | frame_identical |       |                    |
| 21   | SGCV16    | 39.29            | 4.35                       | placed          |       |                    |
| 21   | TKY721    | 39.29            | 4.35                       | placed          |       |                    |
| 21   | SLC27A1   | 62.18            | 2.38                       | frame           | HSA19 | 17.44              |
| 21   | JAK3      | 67.59            | 0.42                       | placed          | HSA19 | 17.80              |
| 21   | INSL3     | 72.69            | 0.98                       | placed          | HSA19 | 17.79              |
| 21   | JUND      | 77.5             | 2.38                       | frame           | HSA19 | 18.25              |
| 21   | PIK3R2    | 77.5             | 2.38                       | frame_identical | HSA19 | 18.13              |
| 21   | LSM4      | 77.5             | 2.38                       | frame_identical | HSA19 | 18.28              |
| 21   | FKBP8     | 91.88            | 4.52                       | frame           | HSA19 | 18.50              |
| 21   | TKY678    | 106.34           | 1.16                       | placed          |       |                    |
| 21   | CCNB1     | 111.14           | 4.52                       | frame           | HSA5  | 68.50              |
| 21   | UMNe564   | 111.14           | 4.52                       | frame_identical |       |                    |
| 21   | ERBB2IP   | 127.27           | 4.35                       | frame           | HSA5  | 65.26              |
| 21   | LOC375449 | 133.04           | 2.49                       | placed          | HSA5  | 65.93              |
| 21   | FLJ13611  | 146.42           | 3.61                       | frame           | HSA5  | 64.96              |
| 21   | ADAMTS6   | 161.01           | 2.15                       | placed          | HSA5  | 64.48              |
| 21   | RFXANK    | ---              | [JUND -<br>CCNB1]          | binned          | HSA19 | 19.16              |
| 21   | GMIP      | ---              | [JUND -<br>CCNB1]          | binned          | HSA19 | 19.60              |
| 21   | GDF1      | ---              | [JUND -<br>CCNB1]          | binned          | HSA19 | 18.84              |
| 21   | EDG4      | ---              | [JUND -<br>CCNB1]          | binned          | HSA19 | 19.60              |
| 21   | COMP      | ---              | [JUND -<br>CCNB1]          | binned          | HSA19 | 18.75              |
| 21   | TSSK6     | ---              | [JUND -<br>CCNB1]          | binned          | HSA19 | 19.49              |
| 21   | CRTC1     | ---              | [FKBP8 -<br>ERBB2IP]       | binned          | HSA19 | 18.66              |
| 21   | SFRS14    | ---              | [FKBP8 -<br>ERBB2IP]       | binned          | HSA19 | 18.96              |
| 21   | 21STS02   | ---              | [FKBP8 -<br>ERBB2IP]       | binned          |       |                    |
| 21   | TKY806    | ---              | [ERBB2IP - q-<br>terminal] | binned          | HSA5  | 66                 |
| 21   | HTR1A     | 0                | 3.44                       | frame           | HSA5  | 63.29              |
| 21   | DIMT1L    | 17.57            | 3.44                       | frame           | HSA5  | 61.72              |
| 21   | ERCC8     | 22.71            | 1.14                       | placed          | HSA5  | 60.21              |
| 21   | UMNe229   | 22.71            | 1.14                       | placed          | HSA5  | 60.9               |
| 21   | TKY677    | 32.75            | 4.02                       | placed          | HSA5  | 59.9               |
| 21   | DEPDC1B   | 42.72            | 4.33                       | placed          | HSA5  | 59.93              |
| 21   | PLK2      | 62.2             | 1.63                       | frame           | HSA5  | 57.79              |
| 21   | MIER3     | 84.23            | 1.63                       | frame           | HSA5  | 56.25              |
| 21   | UMNe539   | 88.14            | 0.91                       | placed          |       |                    |
| 21   | HTG10     | 116.02           | 1.8                        | frame           |       |                    |

|    |         |        |                           |                 |      |       |
|----|---------|--------|---------------------------|-----------------|------|-------|
| 21 | UMNe147 | 129.9  | 2.87                      | placed          | HSA5 | 54.6  |
| 21 | HSPB3   | 129.9  | 2.38                      | placed          | HSA5 | 53.79 |
| 21 | DDX4    | 138.37 | 0.2                       | placed          | HSA5 | 55.07 |
| 21 | GZMA    | 142.27 | 3.42                      | frame           | HSA5 | 54.43 |
| 21 | FST     | 155.47 | 4.1                       | frame           | HSA5 | 52.81 |
| 21 | PELO    | 174.04 | 2.5                       | frame           | HSA5 | 52.12 |
| 21 | LEX060  | 183.33 | 0.24                      | placed          | HSA5 | 50.7  |
| 21 | TKY868  | 201.79 | 1.66                      | frame           | HSA5 | 50.7  |
| 21 | 21CA001 | 223.82 | 1.66                      | frame           |      |       |
| 21 | HCN1    | 242.41 | 1.88                      | placed          | HSA5 | 45.30 |
| 21 | COR068  | 256.37 | 4.96                      | frame           | HSA5 | 45    |
| 21 | HMGCS1  | 265.19 | 2.66                      | placed          | HSA5 | 43.33 |
| 21 | NNT     | 265.19 | 2.66                      | placed          | HSA5 | 43.64 |
| 21 | FBXO4   | 269.41 | 3.35                      | frame           | HSA5 | 41.96 |
| 21 | GHR     | 269.41 | 3.35                      | frame_identical | HSA5 | 42.46 |
| 21 | PRKAA1  | 282.61 | 3.35                      | frame           | HSA5 | 40.80 |
| 21 | C6      | 291.09 | 1.28                      | placed          | HSA5 | 41.18 |
| 21 | TTC33   | 299.91 | 2.14                      | frame           | HSA5 | 40.75 |
| 21 | C9      | 313.79 | 2.14                      | frame           | HSA5 | 39.32 |
| 21 | DAB2    | 313.79 | 2.14                      | frame_identical | HSA5 | 39.41 |
| 21 | TKY671  | 313.79 | 2.14                      | frame_identical |      |       |
| 21 | GDNF    | 323.54 | 2.36                      | placed          | HSA5 | 37.85 |
| 21 | UMNe139 | 333.86 | 4.63                      | placed          | HSA5 | 38.1  |
| 21 | EGFLAM  | 333.86 | 4.63                      | placed          | HSA5 | 38.29 |
| 21 | UMNe206 | 333.86 | 4.63                      | placed          | HSA5 | 38.1  |
| 21 | IL7R    | 370.1  | 0.6                       | placed          | HSA5 | 35.89 |
| 21 | PRLR    | 388.67 | 3.77                      | frame           | HSA5 | 35.10 |
| 21 | BXDC2   | 404.17 | 2.35                      | placed          | HSA5 | 34.95 |
| 21 | C1QTNF3 | 413.48 | 0.87                      | frame           | HSA5 | 34.05 |
| 21 | TARS    | 422.31 | 1.05                      | placed          | HSA5 | 33.48 |
| 21 | C5orf22 | 426.52 | 0.87                      | frame           | HSA5 | 31.57 |
| 21 | UMNe509 | 426.52 | 0.87                      | frame_identical | HSA5 | 31.7  |
| 21 | HTG32   | 426.52 | 0.87                      | frame_identical |      |       |
| 21 | NPR3    | 430.74 | 1.6                       | placed          | HSA5 | 32.7  |
| 21 | SKP2    | 467.75 | 0.64                      | placed          | HSA5 | 36.1  |
| 21 | TKY824  | 471.36 | 1.22                      | placed          |      |       |
| 21 | TKY418  | ---    | [p-terminal -<br>D1MT1L]  | binned          |      |       |
| 21 | KIF2A   | ---    | [p-terminal -<br>D1MT1L]  | binned          | HSA5 | 61.68 |
| 21 | PDE4D   | ---    | [D1MT1L -<br>MIER3]       | binned          | HSA5 | 58.3  |
| 21 | UMNe464 | ---    | [PRLR -<br>C5orf22]       | binned          | HSA5 | 34.8  |
| 21 | COR073  | ---    | [FST -<br>TKY868]         | binned          |      |       |
| 21 | PARP8   | ---    | [TKY868 -<br>COR068]      | binned          | HSA5 | 50    |
| 21 | UMNe327 | ---    | [TTC33 -<br>PRLR]         | binned          |      |       |
| 21 | C5orf23 | ---    | [C1QTNF3 -<br>q-terminal] | binned          | HSA5 | 32.82 |

|    |         |        |                           |                 |       |      |
|----|---------|--------|---------------------------|-----------------|-------|------|
| 21 | TKY280  | ---    | [C1QTNF3 -<br>q-terminal] | binned          |       |      |
| 21 | TKY2049 | ---    | [C1QTNF3 -<br>q-terminal] | binned          | HSA 5 | 31.7 |
| 21 | CDH9    | 0      | 2.71                      | frame           | HSA5  | 26.9 |
| 21 | LEX031  | 4.72   | 0.63                      | placed          |       |      |
| 21 | TKY907  | 9.72   | 0.3                       | placed          |       |      |
| 21 | CDH10   | 39.48  | 2.71                      | frame           | HSA5  | 24.5 |
| 21 | CDH12   | 49.42  | 2.29                      | placed          | HSA5  | 21.7 |
| 21 | UMNe603 | 65.19  | 6.74                      | frame           |       |      |
| 21 | MYO10   | 89.13  | 4.01                      | frame           | HSA5  | 16.7 |
| 21 | BASP1   | 94.41  | 2.44                      | placed          | HSA5  | 17.2 |
| 21 | AHT077  | 99.39  | 0.14                      | placed          | HSA5  | 18   |
| 21 | FBXL7   | 99.39  | 0.14                      | placed          | HSA5  | 15.6 |
| 21 | TKY296  | 104.11 | 4.01                      | frame           |       |      |
| 21 | TRIO    | 118.99 | 2.2                       | placed          | HSA5  | 14.2 |
| 21 | DNAH5   | 123.97 | 5.71                      | frame           | HSA5  | 13.7 |
| 21 | TKY355  | 123.97 | 5.71                      | frame_identical |       |      |
| 21 | LEX037  | 140.85 | 2.24                      | placed          | HSA5  | 12   |
| 21 | AHT010  | 140.85 | 2.24                      | placed          |       |      |
| 21 | 21STS01 | 152.07 | 2.06                      | frame           |       |      |
| 21 | TKY709  | 157.34 | 2.34                      | placed          |       |      |
| 21 | SEMA5A  | 167.87 | 2.06                      | frame           | HSA5  | 9    |
| 21 | POLS    | 188.87 | 2.67                      | frame           | HSA5  | 6.7  |
| 21 | TKY623  | 215.66 | 0.23                      | placed          |       |      |
| 21 | TKY306  | 219.31 | 1.41                      | frame           |       |      |
| 21 | C5orf38 | 223.1  | 0.29                      | placed          | HSA 5 | 2.81 |
| 21 | UMNe432 | 227.03 | 1.06                      | placed          |       |      |
| 21 | SDHA    | 230.97 | 1.41                      | frame           | HSA5  | 0.27 |
| 21 | AHT078  | 243.25 | 1.68                      | placed          | HSA5  | 0.9  |
| 21 | TKY520  | ---    | [DNAH5 -<br>SEMA5A]       | binned          | HSA5  | 9.9  |
| 21 | UMNe179 | ---    | [MYO10 -<br>DNAH5]        | binned          |       |      |
| 21 | TKY1018 | ---    | [UMNe603 -<br>TKY296]     | binned          | HSA5  | 16   |
| 21 | ADCY2   | ---    | [SEMA5A -<br>TKY306]      | binned          | HSA5  | 7.4  |

| Horse Chr. | Marker   | Map Position (cR) | Placement LOD | Assignment | Human Chr. | Human Mb (Build 36.1) |
|------------|----------|-------------------|---------------|------------|------------|-----------------------|
| 22         | TKY1106  | 0                 | 4.93          | frame      |            |                       |
| 22         | XRN2     | 12.49             | 2.22          | placed     | HSA20      | 21.23                 |
| 22         | NAPB     | 18.42             | 4.43          | frame      | HSA20      | 23.30                 |
| 22         | C20orf39 | 30.84             | 4.43          | frame      | HSA20      | 24.40                 |
| 22         | COR001   | 37.18             | 1.96          | placed     |            |                       |
| 22         | TKY1009  | 52.21             | 3.85          | placed     |            |                       |
| 22         | HARS2    | 56.01             | 4.89          | placed     | HSA20      | 18.52                 |
| 22         | SEC23B   | 59.42             | 3.95          | placed     | HSA20      | 18.44                 |
| 22         | DSTN     | 62.36             | 1.99          | placed     | HSA20      | 17.50                 |

|    |          |        |      |                 |       |       |
|----|----------|--------|------|-----------------|-------|-------|
| 22 | SNRPB2   | 65.23  | 3.03 | frame           | HSA20 | 16.66 |
| 22 | C20orf7  | 84.98  | 3.03 | frame           | HSA20 | 13.71 |
| 22 | TKY308   | 84.98  | 3.03 | frame_identical | HSA20 | 13.3  |
| 22 | BTBD3    | 102.36 | 6.3  | placed          | HSA20 | 11.82 |
| 22 | TKY1158  | 102.36 | 6.3  | placed          |       |       |
| 22 | TCF15    | 109.05 | 4.67 | placed          | HSA20 | 0.53  |
| 22 | UMNe355  | 112.39 | 2.36 | placed          |       |       |
| 22 | JAG1     | 115.64 | 5.02 | frame           | HSA20 | 10.57 |
| 22 | PLCB4    | 125.43 | 0.58 | frame           | HSA20 | 9.02  |
| 22 | PAK7     | 125.43 | 0.58 | frame_identical | HSA20 | 9.47  |
| 22 | HTG14    | 139.31 | 0.58 | frame           |       |       |
| 22 | PLCB1    | 165.79 | 2.28 | placed          | HSA20 | 8.06  |
| 22 | TKY345   | 175.98 | 1.97 | placed          | HSA20 | 8.2   |
| 22 | HAO1     | 182.53 | 3.93 | frame           | HSA20 | 7.81  |
| 22 | AHT110   | 182.53 | 3.93 | frame_identical |       |       |
| 22 | BMP2     | 192.61 | 3.63 | frame           | HSA20 | 6.70  |
| 22 | TKY593   | 192.61 | 3.63 | frame_identical | HSA20 | 5.8   |
| 22 | C20orf30 | 207.41 | 2.17 | frame           | HSA20 | 5.03  |
| 22 | LEX002   | 219.82 | 2.41 | placed          | HSA20 | 3.4   |
| 22 | PRNP     | 236.51 | 4.23 | frame           | HSA20 | 4.62  |
| 22 | ATRN     | 248.5  | 0.11 | placed          | HSA20 | 3.40  |
| 22 | UMNe215  | 248.5  | 0.11 | placed          |       |       |
| 22 | CENPB    | 256.43 | 2.35 | placed          | HSA20 | 3.71  |
| 22 | CPXM1    | 260.11 | 5.92 | frame           | HSA20 | 2.72  |
| 22 | ITPA     | 264.4  | 2.26 | placed          | HSA20 | 3.14  |
| 22 | SNRPB    | 264.4  | 2.19 | placed          | HSA20 | 2.39  |
| 22 | TGM3     | 268.72 | 0.99 | placed          | HSA20 | 2.22  |
| 22 | SIRPB1   | 272.86 | 1.1  | placed          | HSA20 | 1.49  |
| 22 | PDYN     | 280.23 | 4.74 | placed          | HSA20 | 1.91  |
| 22 | FKBP1A   | 290.61 | 6.74 | frame           | HSA20 | 1.30  |
| 22 | PSMF1    | 301.82 | 2.06 | placed          | HSA20 | 1.04  |
| 22 | BCL2L1   | 319.67 | 2.93 | placed          | HSA20 | 29.72 |
| 22 | COR022   | 358.45 | 4.51 | frame           | HSA20 | 29.9  |
| 22 | TKY2468  | 362.02 | 0.3  | placed          | HSA20 | 29.9  |
| 22 | TKY785   | 382.1  | 2.23 | placed          |       |       |
| 22 | TM9SF4   | 389.51 | 3.58 | placed          | HSA20 | 30.18 |
| 22 | KIF3B    | 392.96 | 4.51 | frame           | HSA20 | 30.33 |
| 22 | UMNe105  | 392.96 | 4.51 | frame_identical |       |       |
| 22 | UMNe077  | 403.02 | 5.83 | frame           | HSA20 | 30.5  |
| 22 | RALY     | 413.74 | 5.83 | frame           | HSA20 | 32.05 |
| 22 | HMS053   | 425.29 | 2.55 | placed          | HSA20 | 32.3  |
| 22 | AHCY     | 428.97 | 4.48 | frame           | HSA20 | 32.33 |
| 22 | ASIP     | 428.97 | 4.48 | frame_identical | HSA20 | 32.31 |
| 22 | PROCR    | 436.34 | 2.23 | placed          | HSA20 | 33.22 |
| 22 | TGIF2    | 447.81 | 4.09 | frame           | HSA20 | 34.64 |
| 22 | ITCH     | 459.36 | 0.95 | placed          | HSA20 | 32.41 |
| 22 | SRC      | 462.92 | 4.09 | frame           | HSA20 | 35.41 |
| 22 | C20orf24 | 462.92 | 4.09 | frame_identical | HSA20 | 34.67 |
| 22 | TKY1315  | 469.86 | 0.48 | placed          | HSA20 | 33    |
| 22 | MYL9     | 501.75 | 2.57 | placed          | HSA20 | 34.60 |

|    |         |        |               |                 |       |       |
|----|---------|--------|---------------|-----------------|-------|-------|
| 22 | UMNe499 | 522.15 | 3.62          | placed          | HSA20 | 36.9  |
| 22 | TKY554  | 522.15 | 3.62          | placed          |       |       |
| 22 | SLC32A1 | 522.15 | 3.62          | placed          | HSA20 | 36.79 |
| 22 | TKY2105 | 522.15 | 3.62          | placed          | HSA20 | 36.1  |
| 22 | TKY1160 | 522.15 | 4.79          | placed          | HSA20 | 37.9  |
| 22 | TGM2    | 522.15 | 3.62          | placed          | HSA20 | 36.19 |
| 22 | ZHX3    | 535.89 | 4.34          | frame           | HSA20 | 39.24 |
| 22 | TOP1    | 539.05 | 1.38          | placed          | HSA20 | 39.09 |
| 22 | TKY582  | 539.05 | 1.62          | placed          | HSA20 | 39.4  |
| 22 | SGCV01  | 539.05 | 2.51          | placed          | HSA20 | 38.8  |
| 22 | PTPRT   | 545.6  | 3.48          | placed          | HSA20 | 40.13 |
| 22 | SFRS6   | 555.73 | 4.34          | frame           | HSA20 | 41.52 |
| 22 | UMNe490 | 555.73 | 4.34          | frame_identical | HSA20 | 41.2  |
| 22 | UMNe208 | 562.63 | 4.88          | placed          | HSA20 | 41.9  |
| 22 | ADA     | 569.57 | 4.6           | frame           | HSA20 | 42.68 |
| 22 | SERINC3 | 572.94 | 1.47          | placed          | HSA20 | 42.56 |
| 22 | CTSA    | 579.84 | 2.25          | frame           | HSA20 | 43.95 |
| 22 | TKY567  | 590.55 | 1.79          | placed          | HSA20 | 44    |
| 22 | MMP9    | 597.68 | 0.76          | frame           | HSA20 | 44.07 |
| 22 | MATN4   | 624.92 | 0.76          | frame           | HSA20 | 43.36 |
| 22 | UMNe183 | 661.96 | 2.94          | placed          | HSA20 | 45.2  |
| 22 | TKY572  | 661.96 | 2.92          | placed          | HSA20 | 45.7  |
| 22 | EYA2    | 661.96 | 2.94          | placed          | HSA20 | 44.96 |
| 22 | DDX27   | 676.22 | 3.7           | placed          | HSA20 | 47.27 |
| 22 | COR107  | 685.64 | 1.86          | placed          |       |       |
| 22 | ATP9A   | 693.01 | 0.5           | placed          | HSA20 | 49.65 |
| 22 | SNAI1   | 696.57 | 1.75          | frame           | HSA20 | 48.03 |
| 22 | UMNe537 | 696.57 | 1.75          | frame_identical |       |       |
| 22 | DOK5    | 703.69 | 0.11          | placed          | HSA20 | 52.53 |
| 22 | UMNe137 | 710.81 | 1.36          | placed          |       |       |
| 22 | TKY498  | 710.81 | 1.36          | placed          | HSA20 | 51.2  |
| 22 | CSTF1   | 718.18 | 1.75          | frame           | HSA20 | 54.40 |
| 22 | UMNe358 | 734.11 | 0.84          | placed          | HSA20 | 53    |
| 22 | UMNe607 | 759.26 | 7.26          | frame           | HSA20 | 56.5  |
| 22 | GNAS    | 771.25 | 4.7           | placed          | HSA20 | 56.85 |
| 22 | ATP5E   | 792.15 | 0.56          | placed          | HSA20 | 57.04 |
| 22 | TH1L    | 804.07 | 1.73          | frame           | HSA20 | 56.99 |
| 22 | CDH4    | 815.55 | 1.73          | frame           | HSA20 | 59.26 |
| 22 | SGCV19  | 815.55 | 1.73          | frame_identical |       |       |
| 22 | TAF4    | 822.45 | 0.21          | placed          | HSA20 | 59.98 |
| 22 | EDN3    | 843.23 | 1.26          | placed          | HSA20 | 57.31 |
| 22 | AHT031  | 855.79 | 2.39          | placed          |       |       |
| 22 | UMNe441 | 867.71 | 2.52          | placed          |       |       |
| 22 | RPS21   | 871.67 | 4.31          | frame           | HSA20 | 60.40 |
| 22 | TCFL5   | 884.64 | 1.88          | frame           | HSA20 | 60.94 |
| 22 | SOX18   | 898.21 | 0.44          | placed          | HSA20 | 62.15 |
| 22 | TKY548  | 911.25 | 1.88          | frame           |       |       |
| 22 | TKY695  | ---    | [SRC - SFRS6] | binned          |       |       |
| 22 | TKY2844 | ---    | [SRC - SFRS6] | binned          | HSA20 | 38.8  |
| 22 | PLCG1   | ---    | [SRC - SFRS6] | binned          | HSA20 | 39.20 |

|    |         |     |                          |        |       |       |
|----|---------|-----|--------------------------|--------|-------|-------|
| 22 | MAFB    | --- | [SRC - SFRS6]            | binned | HSA20 | 38.75 |
| 22 | SGK2    | --- | [ZHX3 - ADA]             | binned | HSA20 | 41.62 |
| 22 | ITGB4BP | --- | [RALY - TGIF2]           | binned | HSA20 | 33.33 |
| 22 | TKY560  | --- | [TGIF2 - ZHX3]           | binned |       |       |
| 22 | UMNe466 | --- | [ADA - MMP9]             | binned |       |       |
| 22 | YWHAB   | --- | [ADA - MMP9]             | binned | HSA20 | 42.95 |
| 22 | EPB41L1 | --- | [AHCY - SRC]             | binned | HSA20 | 34.16 |
| 22 | HTG21   | --- | [AHCY - SRC]             | binned |       |       |
| 22 | SNTA1   | --- | [RALY - TGIF2]           | binned | HSA20 | 31.46 |
| 22 | COR016  | --- | [SRC - SFRS6]            | binned | HSA20 | 40.1  |
| 22 | PIGT    | --- | [ADA - MMP9]             | binned | HSA20 | 43.48 |
| 22 | PTPN1   | --- | [MATN4 - CSTF1]          | binned | HSA20 | 48.56 |
| 22 | ZNFX1   | --- | [MATN4 - CSTF1]          | binned | HSA20 | 47.30 |
| 22 | HMS47   | --- | [MATN4 - CSTF1]          | binned | HSA20 | 50.3  |
| 22 | ACSS1   | --- | [NAPB - SNRPB2]          | binned | HSA20 | 24.93 |
| 22 | RRBP1   | --- | [C20orf39 -<br>C20orf7]  | binned | HSA20 | 17.54 |
| 22 | TKY1093 | --- | [NAPB - SNRPB2]          | binned |       |       |
| 22 | TKY285  | --  | [SNRPB2 - JAG1]          | binned |       |       |
| 22 | HM13    | --  | [FKBP1A -<br>KIF3B]      | binned | HSA20 | 29.57 |
| 22 | TKY596  | --  | [CDH4 - TCFL5]           | binned |       |       |
| 22 | PSMA7   | --  | [TH1L - RPS21]           | binned | HSA20 | 60.15 |
| 22 | ADRM1   | --  | [CDH4 - TCFL5]           | binned | HSA20 | 60.31 |
| 22 | 22STS01 | --  | [TCFL5 - q-<br>terminal] | binned |       |       |
| 22 | ZGPAT   | --  | [TCFL5 - q-<br>terminal] | binned | HSA20 | 61.81 |

| Horse<br>Chr. | Marker          | Map<br>Position<br>(cR) | Placement<br>LOD | Assignment      | Human<br>Chr. | Human<br>Mb<br>(Build<br>36.1) |
|---------------|-----------------|-------------------------|------------------|-----------------|---------------|--------------------------------|
| 23            | CH241-115F18_T7 | 0                       | 8.16             | frame           | HSA9          | 41.5                           |
| 23            | CTSL1           | 23.75                   | 7.73             | frame           | HSA9          | 89.53                          |
| 23            | DAPK1           | 38.43                   | 2.27             | frame           | HSA9          | 89.30                          |
| 23            | FBP1            | 38.43                   | 2.27             | frame_identical | HSA9          | 96.41                          |
| 23            | COR060/055      | 38.43                   | 2.27             | frame_identical |               |                                |
| 23            | UM019           | 44.48                   | 2.84             | placed          | HSA9          | 86.8                           |
| 23            | GAS1            | 50.68                   | 2.27             | frame           | HSA9          | 88.75                          |
| 23            | AHT039          | 70.66                   | 1.84             | frame           |               |                                |
| 23            | TKY1122         | 80.05                   | 1.84             | frame           |               |                                |
| 23            | TKY2433         | 95.59                   | 0.26             | placed          | HSA9          | 83.2                           |
| 23            | AGTPBP1         | 118.25                  | 2.62             | frame           | HSA9          | 87.35                          |
| 23            | TLE4            | 164                     | 5.2              | frame           | HSA9          | 81.38                          |
| 23            | AHT072          | 185.19                  | 2.14             | frame           | HSA9          | 78.5                           |
| 23            | TKY2485         | 192.73                  | 0.26             | placed          | HSA9          | 78.8                           |
| 23            | TKY568          | 196.37                  | 2.14             | frame           |               |                                |
| 23            | VHL121          | 215.2                   | 2.16             | frame           |               |                                |
| 23            | CH241-2L11_SP6  | 234.04                  | 2.16             | frame           |               |                                |
| 23            | CH241-42I2_SP6  | 253.58                  | 4.02             | frame           |               |                                |



|    |                 |        |                            |                 |      |       |
|----|-----------------|--------|----------------------------|-----------------|------|-------|
| 23 | TMC1            | 273.9  | 1.38                       | frame           | HSA9 | 74.33 |
| 23 | UMNe357         | 282    | 0.42                       | placed          | HSA9 | 71.9  |
| 23 | UMNe51          | 282    | 0.42                       | placed          | HSA9 | 71.9  |
| 23 | ALDH1A1         | 290.44 | 2.05                       | placed          | HSA9 | 74.71 |
| 23 | AHT117          | 300.15 | 1.38                       | frame           |      |       |
| 23 | ASB39           | 356.33 | 0.65                       | frame           | HSA9 | 69.6  |
| 23 | TKY301          | 368.49 | 0.64                       | placed          | HSA9 | 69.4  |
| 23 | TJP2            | 376.93 | 0.65                       | frame           | HSA9 | 70.98 |
| 23 | TKY947          | 376.93 | 0.65                       | frame_identical | HSA9 | 68.2  |
| 23 | UMNe473         | 381.35 | 2.47                       | placed          | HSA9 | 69.1  |
| 23 | DOCK8           | 385.76 | 2.63                       | placed          | HSA9 | 0.26  |
| 23 | VLDLR           | 400.38 | 2.1                        | frame           | HSA9 | 2.61  |
| 23 | RANBP6          | 420.07 | 2.1                        | frame           | HSA9 | 6.00  |
| 23 | HP13            | 429.39 | 3.69                       | placed          |      |       |
| 23 | LOC158345       | 434.01 | 4.28                       | frame           | HSA9 | 7.47  |
| 23 | PTPRD           | 450.94 | 3.99                       | frame           | HSA9 | 8.31  |
| 23 | UM027           | 463.09 | 3.99                       | frame           | HSA9 | 8.8   |
| 23 | LEX063          | 463.09 | 3.99                       | frame_identical | HSA9 | 8.8   |
| 23 | CH241-92F11_SP6 | 476.35 | 4.7                        | placed          |      |       |
| 23 | UM022           | 490.27 | 0.21                       | placed          | HSA9 | 12.6  |
| 23 | TYRP1           | 494.9  | 4.09                       | frame           | HSA9 | 12.68 |
| 23 | UMNe069         | 494.9  | 4.09                       | frame_identical |      |       |
| 23 | TKY2321         | 508.81 | 2.33                       | frame           | HSA9 | 14.1  |
| 23 | TKY536          | 508.81 | 2.33                       | frame_identical | HSA9 | 13.9  |
| 23 | AHT114          | 522.7  | 2.33                       | frame           |      |       |
| 23 | SNAPC3          | 544.63 | 3.19                       | frame           | HSA9 | 15.41 |
| 23 | PTCH1           | ---    | [CTSL1 - GAS1]             | binned          | HSA9 | 97.25 |
| 23 | TKY346          | ---    | [TKY568 - CH241- 2L11_SP6] | binned          | HSA9 | 75.8  |
| 23 | TKY2336         | ---    | [AHT072 - VHL121]          | binned          | HSA9 | 82    |
| 23 | TKY367          | ---    | [VHL121 - CH241- 42I2_SP6] | binned          | HSA9 | 81.7  |
| 23 | UM018           | ---    | [TYRP1 - AHT114]           | binned          | HSA9 | 13.9  |
| 23 | TKY881          | ---    | [VLDLR - LOC158345]        | binned          | HSA9 | 7.9   |
| 23 | LEX053          | 0      | 0                          | frame           |      |       |
| 23 | UMNe524         | 0      | 0                          | frame_identical |      |       |
| 23 | TKY486          | 0      | 0                          | frame_identical |      |       |
| 23 | TKY385          | 0      | 0                          | frame_identical |      |       |
| 23 | TKY542          | 0      | 3.1                        | frame           | HSA9 | 23.4  |
| 23 | TKY441          | 9.62   | 0.57                       | placed          | HSA9 | 23.8  |
| 23 | CH241-80K19_T7  | 19.24  | 2.25                       | placed          | HSA9 | 24.4  |
| 23 | PLAA            | 27.78  | 2.12                       | placed          | HSA9 | 26.89 |
| 23 | LINGO2          | 36.32  | 3.5                        | frame           | HSA9 | 27.94 |
| 23 | CH241-34H11_T7  | 36.32  | 3.5                        | frame_identical |      |       |
| 23 | NVHEQ026        | 36.32  | 3.5                        | frame_identical |      |       |
| 23 | UMNe142         | 45.94  | 2.07                       | placed          |      |       |

|    |                |        |                       |                 |      |       |
|----|----------------|--------|-----------------------|-----------------|------|-------|
| 23 | CH241-32E21_T7 | 55.56  | 2.11                  | placed          |      |       |
| 23 | UMNe159        | 55.56  | 2.11                  | placed          | HSA9 | 30.8  |
| 23 | NDUFB6         | 64.1   | 3.53                  | frame           | HSA9 | 32.54 |
| 23 | AQP7           | 64.1   | 3.53                  | frame_identical | HSA9 | 33.37 |
| 23 | TKY339         | 79.32  | 0.19                  | placed          |      |       |
| 23 | GADD45G        | 130.18 | 1.29                  | frame           | HSA9 | 91.41 |
| 23 | UMNe560        | 167.15 | 1.29                  | frame           |      |       |
| 23 | TKY269         | ---    | [TKY542 -<br>NDUFB6]  | binned          | HSA9 | 27.3  |
| 23 | TKY2261        | ---    | [TKY542 -<br>NDUFB6]  | binned          | HSA9 | 27.1  |
| 23 | OPRS1          | ---    | [NDUFB6 -<br>UMNe560] | binned          | HSA9 | 34.62 |
| 23 | CNTFR          | ---    | [NDUFB6 -<br>UMNe560] | binned          | HSA9 | 34.54 |
| 23 | SPTLC1         | ---    | [NDUFB6 -<br>UMNe560] | binned          | HSA9 | 93.83 |
| 23 | SPIN1          | ---    | [NDUFB6 -<br>UMNe560] | binned          | HSA9 | 90.19 |
| 23 | SGCV04         | ---    | [NDUFB6 -<br>UMNe560] | binned          |      |       |

| Horse Chr. | Marker  | Map Position (cR) | Placement LOD      | Assignment      | Human Chr. | Human Mb (Build 36.1) |
|------------|---------|-------------------|--------------------|-----------------|------------|-----------------------|
| 24         | TKY831  | 0                 | 3.04               | placed          |            |                       |
| 24         | AHT119  | 33.13             | 0.28               | placed          |            |                       |
| 24         | SIX6    | 50.9              | 2.5                | frame           | HSA14      | 60.05                 |
| 24         | HIF1A   | 64.17             | 2.5                | frame           | HSA14      | 61.23                 |
| 24         | TKY524  | 83.18             | 5.44               | frame           | HSA14      | 62.2                  |
| 24         | SYNE2   | 102.75            | 6.17               | frame           | HSA14      | 63.39                 |
| 24         | PIGH    | 130.53            | 6.72               | frame           | HSA14      | 67.13                 |
| 24         | UMNe152 | 130.53            | 6.72               | frame_identical |            |                       |
| 24         | AHT071  | 130.53            | 6.72               | frame_identical | HSA14      | 65.9                  |
| 24         | COR087  | 130.53            | 6.72               | frame_identical | HSA14      | 67.2                  |
| 24         | TKY998  | 136.79            | 0.91               | placed          |            |                       |
| 24         | SMOC1   | 171.47            | 2.92               | frame           | HSA14      | 69.42                 |
| 24         | UM012   | 171.47            | 2.92               | frame_identical | HSA14      | 69.6                  |
| 24         | LEX042  | 178.71            | 1.61               | placed          |            |                       |
| 24         | NUMB    | 198.38            | 2.92               | frame           | HSA14      | 72.81                 |
| 24         | TKY1594 | ---               | [SYNE2 -<br>SMOC1] | binned          | HSA14      | 67.1                  |
| 24         | MED6    | ---               | [PIGH -<br>NUMB]   | binned          | HSA14      | 70.12                 |
| 24         | UMNe569 | ---               | [PIGH -<br>NUMB]   | binned          |            |                       |
| 24         | SLC8A3  | ---               | [PIGH -<br>NUMB]   | binned          | HSA14      | 69.58                 |
| 24         | TMED10  | 0                 | 2.76               | frame           | HSA14      | 74.67                 |
| 24         | AHT032  | 10.13             | 2.07               | placed          | HSA14      | 75                    |
| 24         | 24STS01 | 13.22             | 2.76               | frame           |            |                       |

| 24            | TKY036    | 41.64                   | 2.33                 | frame           | HSA14         | 76.6                        |
|---------------|-----------|-------------------------|----------------------|-----------------|---------------|-----------------------------|
| 24            | TKY037    | 51.46                   | 0.35                 | placed          |               |                             |
| 24            | TKY756    | 54.64                   | 1.95                 | placed          |               |                             |
| 24            | UMNe389   | 64.84                   | 0.13                 | placed          | HSA14         | 75.9                        |
| 24            | AHSA1     | 82.3                    | 2.33                 | frame           | HSA14         | 76.99                       |
| 24            | AHT004    | 112.65                  | 5.89                 | frame           |               |                             |
| 24            | TKY982    | 151.25                  | 1.67                 | placed          | HSA14         | 77.9                        |
| 24            | EA2C4     | 188.15                  | 1.05                 | frame           |               |                             |
| 24            | TKY357    | 197.95                  | 1.03                 | placed          | HSA14         | 81.1                        |
| 24            | SEL1L     | 201.23                  | 1.05                 | frame           | HSA14         | 81.01                       |
| 24            | TKY564    | 223.8                   | 1.88                 | frame           | HSA14         | 86.5                        |
| 24            | UMNe210   | 227.24                  | 1.88                 | placed          | HSA14         | 85.2                        |
| 24            | FLRT2     | 234.36                  | 1.13                 | placed          | HSA14         | 85.07                       |
| 24            | TKY849    | 265.54                  | 2.73                 | placed          |               |                             |
| 24            | COR061    | 310.1                   | 1.68                 | placed          | HSA14         | 91.5                        |
| 24            | TKY307    | 316                     | 1.62                 | frame           | HSA14         | 89.2                        |
| 24            | LEX074    | 318.95                  | 1.73                 | placed          | HSA14         | 90.2                        |
| 24            | TKY394    | 318.95                  | 1.62                 | placed          | HSA14         | 90.1                        |
| 24            | CALM1     | 348.95                  | 1.62                 | frame           | HSA14         | 89.93                       |
| 24            | VRK1      | 414.83                  | 6.65                 | placed          | HSA14         | 96.33                       |
| 24            | LEX032    | 452.82                  | 1.77                 | frame           |               |                             |
| 24            | TKY864    | 468.56                  | 1.11                 | placed          |               |                             |
| 24            | SERPINA1  | 471.52                  | 1.77                 | frame           | HSA14         | 93.91                       |
| 24            | BDKRB2    | 487.15                  | 4.92                 | frame           | HSA14         | 95.74                       |
| 24            | TKY857    | 507.58                  | 0.76                 | placed          | HSA14         | 97.6                        |
| 24            | COR024    | 521.13                  | 4.92                 | frame           | HSA14         | 98.3                        |
| 24            | TKY1083   | 530.95                  | 0.92                 | placed          | HSA14         | 97.3                        |
| 24            | WARS      | 576.43                  | 6.48                 | frame           | HSA14         | 99.87                       |
| 24            | 24STS02   | 576.43                  | 6.48                 | frame_identical |               |                             |
| 24            | UCDEQ467  | 579.9                   | 2.94                 | placed          |               |                             |
| 24            | DIO3      | 594.23                  | 5.75                 | frame           | HSA14         | 101.10                      |
| 24            | UMNe533   | 615.89                  | 3.23                 | frame           |               |                             |
| 24            | COR025    | 622.45                  | 1.32                 | placed          |               |                             |
| 24            | CDC42BPB  | 632.27                  | 3.23                 | frame           | HSA14         | 102.47                      |
| 24            | TKY1014   | ---                     | [AHT004 -<br>TKY564] | binned          | HSA14         | 78.5                        |
| 24            | TKY782    | ---                     | [LEX032 -<br>BDKRB2] | binned          | HSA14         | 93.4                        |
| 24            | TKY631    | ---                     | [BDKRB2 -<br>WARS]   | binned          | HSA14         | 98.3                        |
| Horse<br>Chr. | Marker    | Map<br>Position<br>(cR) | Placement<br>LOD     | Assignment      | Human<br>Chr. | Human<br>Mb (Build<br>36.1) |
| 25            | TKY575    | 0                       | 1.73                 | placed          |               |                             |
| 25            | COR080    | 21.77                   | 0.89                 | frame           |               |                             |
| 25            | TKY771    | 35.22                   | 2.41                 | placed          |               |                             |
| 25            | STX17     | 38.48                   | 0.89                 | frame           | HSA9          | 101.71                      |
| 25            | NIPSNAP3A | 52.01                   | 1.73                 | frame           | HSA9          | 106.55                      |
| 25            | UMNe362   | 55.16                   | 0.28                 | placed          | HSA9          | 104.6                       |
| 25            | TMEM38B   | 61.86                   | 2.2                  | placed          | HSA9          | 107.50                      |

|    |          |        |                         |                 |      |        |
|----|----------|--------|-------------------------|-----------------|------|--------|
| 25 | UMNe416  | 82.62  | 3.12                    | placed          |      |        |
| 25 | CTNNAL1  | 106.65 | 2.73                    | frame           | HSA9 | 110.74 |
| 25 | UMNe525  | 113.15 | 0.37                    | placed          | HSA9 | 109.5  |
| 25 | TKY302   | 123.51 | 2.73                    | frame           | HSA9 | 109.4  |
| 25 | TXN      | 145.07 | 3.51                    | frame           | HSA9 | 112.05 |
| 25 | TKY1096  | 145.07 | 3.51                    | frame_identical | HSA9 | 110    |
| 25 | COR018   | 148.22 | 2.1                     | placed          | HSA9 | 110.3  |
| 25 | TKY018   | 166.74 | 4.22                    | frame           |      |        |
| 25 | UCDEQ405 | 174.71 | 1.3                     | placed          |      |        |
| 25 | TKY1104  | 197.68 | 3.79                    | frame           |      |        |
| 25 | TKY1064  | 258.78 | 0.35                    | placed          | HSA9 | 114.8  |
| 25 | PAPPA    | 296.89 | 4.94                    | frame           | HSA9 | 117.96 |
| 25 | ZuBeEq12 | 329.01 | 3.86                    | frame           |      |        |
| 25 | UMNe339  | 352.26 | 1.02                    | frame           |      |        |
| 25 | TRAF1    | 370.78 | 0.12                    | placed          | HSA9 | 122.70 |
| 25 | TLR4     | 374.22 | 1.02                    | frame           | HSA9 | 119.51 |
| 25 | STOM     | 374.22 | 1.02                    | frame_identical | HSA9 | 123.14 |
| 25 | TKY316   | 384.91 | 2.34                    | frame           | HSA9 | 121.9  |
| 25 | TKY429   | 396.37 | 2.34                    | frame           | HSA9 | 121.9  |
| 25 | TKY851   | 421.44 | 4.08                    | frame           |      |        |
| 25 | RABGAP1  | 440.56 | 0.8                     | frame           | HSA9 | 124.74 |
| 25 | AHT007   | 458.66 | 0.8                     | frame           |      |        |
| 25 | TKY3347  | 481.34 | 2.18                    | placed          | HSA9 | 123.8  |
| 25 | GOLGA1   | 489.26 | 1.84                    | placed          | HSA9 | 126.68 |
| 25 | HSPA5    | 493.07 | 2.88                    | frame           | HSA9 | 127.04 |
| 25 | UMNe160  | 515.35 | 4.04                    | placed          | HSA9 | 126.1  |
| 25 | TKY292   | 537.63 | 0.47                    | placed          | HSA9 | 127.1  |
| 25 | ANGPTL2  | 551.93 | 2.51                    | frame           | HSA9 | 128.89 |
| 25 | NVHEQ043 | 558.62 | 2.91                    | placed          | HSA9 | 127.4  |
| 25 | AHT051   | 569.68 | 2.51                    | frame           |      |        |
| 25 | TKY1065  | 594.1  | 0.89                    | placed          |      |        |
| 25 | TMEM15   | 601.34 | 3.35                    | frame           | HSA9 | 130.75 |
| 25 | ABL1     | 627.42 | 3.53                    | frame           | HSA9 | 132.58 |
| 25 | EXOSC2   | 627.42 | 3.53                    | frame_identical | HSA9 | 132.56 |
| 25 | SURF2    | 650.06 | 1.06                    | frame           | HSA9 | 135.21 |
| 25 | DBH      | 661.98 | 1.06                    | frame           | HSA9 | 135.49 |
| 25 | TMOD1    | --     | [COR080 -<br>NIPSNAP3A] | binned          | HSA9 | 99.33  |
| 25 | UMNe598  | --     | [AHT007 -<br>ANGPTL2]   | binned          |      |        |

| Horse Chr. | Marker  | Map Position (cR) | Placement LOD | Assignment      | Human Chr. | Human Mb (Build 36.1) |
|------------|---------|-------------------|---------------|-----------------|------------|-----------------------|
| 26         | CGGBP1  | 0                 | 2.37          | frame           | HSA3       | 88.18                 |
| 26         | HTR1F   | 0                 | 2.37          | frame_identical | HSA3       | 88.12                 |
| 26         | POU1F1  | 8.46              | 2.37          | frame           | HSA3       | 87.39                 |
| 26         | UMNe588 | 26.33             | 4.8           | frame           |            |                       |
| 26         | UMNe444 | 31.84             | 2.87          | placed          |            |                       |
| 26         | CH241-  | 34.58             | 4.8           | frame           |            |                       |

|    |            |        |      |                 |       |       |
|----|------------|--------|------|-----------------|-------|-------|
|    | 112P17_SP6 |        |      |                 |       |       |
| 26 | GBE1       | 43.42  | 2.15 | placed          | HSA3  | 81.62 |
| 26 | CH241-     | 49.29  | 4.59 | frame           | HSA3  | 81.7  |
|    | 112C9_SP6  |        |      |                 |       |       |
| 26 | 26STS02    | 49.29  | 4.59 | frame_identical |       |       |
| 26 | 26STS03    | 49.29  | 4.59 | frame_identical |       |       |
| 26 | GBEms1     | 52.15  | 0.22 | placed          |       |       |
| 26 | TKY846     | 55.06  | 0.41 | placed          | HSA3  | 81.6  |
| 26 | TKY386     | 74.75  | 0.27 | placed          | HSA3  | 77.9  |
| 26 | ROBO2      | 74.75  | 0.32 | placed          | HSA3  | 77.17 |
| 26 | CH241-     | 77.66  | 4.59 | frame           |       |       |
|    | 114I13_SP6 |        |      |                 |       |       |
| 26 | ROBO1      | 77.66  | 4.59 | frame_identical | HSA3  | 78.73 |
| 26 | UM031      | 80.52  | 0.28 | placed          | HSA3  | 79.1  |
| 26 | TKY934     | 102.95 | 2.42 | placed          |       |       |
| 26 | USP25      | 155.08 | 0.17 | placed          | HSA21 | 16.02 |
| 26 | UMNe66     | 182.5  | 2.23 | placed          | HSA21 | 15.3  |
| 26 | CH241-     | 192.62 | 4.7  | frame           |       |       |
|    | 111N13_SP6 |        |      |                 |       |       |
| 26 | BTG3       | 206.46 | 0.19 | placed          | HSA21 | 17.89 |
| 26 | C21orf34   | 209.6  | 4.7  | frame           | HSA21 | 16.36 |
| 26 | CH241-     | 215.91 | 3.12 | placed          | HSA21 | 18.6  |
|    | 109H15_T7  |        |      |                 |       |       |
| 26 | CH241-     | 222.24 | 4.2  | placed          | HSA21 | 18.9  |
|    | 102G11_SP6 |        |      |                 |       |       |
| 26 | UMNe153    | 238.74 | 2.15 | placed          |       |       |
| 26 | TKY502     | 245.28 | 0.21 | placed          | HSA21 | 20.5  |
| 26 | UMNe547    | 248.45 | 2.07 | placed          |       |       |
| 26 | LOC391271  | 251.62 | 3.15 | frame           | HSA21 | 20.72 |
| 26 | TKY275     | 267.95 | 2.25 | frame           |       |       |
| 26 | LEX044     | 267.95 | 2.25 | frame_identical | HSA21 | 21.8  |
| 26 | COR071     | 273.96 | 0.29 | placed          |       |       |
| 26 | A-17       | 280.1  | 2.25 | frame           |       |       |
| 26 | APP        | 316.46 | 1.66 | frame           | HSA21 | 26.17 |
| 26 | JAM2       | 336.63 | 1.66 | frame           | HSA21 | 25.93 |
| 26 | TKY778     | 349.27 | 0.5  | placed          | HSA21 | 25.8  |
| 26 | CH241-     | 355.4  | 2.43 | frame           |       |       |
|    | 112M19_T7  |        |      |                 |       |       |
| 26 | ADAMTS5    | 364.41 | 4.54 | frame           | HSA21 | 27.21 |
| 26 | USP16      | 379.22 | 2.13 | frame           | HSA21 | 29.32 |
| 26 | UMNe127    | 387.85 | 2.13 | frame           |       |       |
| 26 | TIAM1      | 411.56 | 2.06 | frame           | HSA21 | 31.41 |
| 26 | COR099     | 438.97 | 2.06 | frame           |       |       |
| 26 | CH241-     | 450.69 | 2.37 | placed          | HSA21 | 31    |
|    | 113E17_SP6 |        |      |                 |       |       |
| 26 | EB2E8      | 456.44 | 2.13 | placed          |       |       |
| 26 | UBE3AP2    | 459.22 | 2.08 | frame           | HSA21 | 31.35 |
| 26 | OLIG1      | 476.8  | 4.64 | frame           | HSA21 | 33.36 |
| 26 | NVHEQ070   | 482.55 | 2.85 | placed          | HSA21 | 33.8  |
| 26 | CH241-     | 488.28 | 2.35 | frame           | HSA21 | 35.3  |
|    | 115F4_SP6  |        |      |                 |       |       |
| 26 | KCNE2      | 488.28 | 2.35 | frame_identical | HSA21 | 34.66 |

|    |                  |        |                                      |                 |       |       |
|----|------------------|--------|--------------------------------------|-----------------|-------|-------|
| 26 | UMNe188          | 488.28 | 2.35                                 | frame_identical | HSA21 | 34.5  |
| 26 | DSCR1            | 491.13 | 0.14                                 | placed          | HSA21 | 34.81 |
| 26 | RUNX1            | 497.13 | 1.69                                 | frame           | HSA21 | 35.08 |
| 26 | IFNGR2           | 497.13 | 1.69                                 | frame_identical | HSA21 | 33.70 |
| 26 | GART             | 497.13 | 1.69                                 | frame_identical | HSA21 | 33.80 |
| 26 | TKY1155          | 513.91 | 1.11                                 | frame           | HSA21 | 33.4  |
| 26 | TKY1017          | 534.66 | 1.11                                 | frame           |       |       |
| 26 | TKY794           | 551.51 | 1.67                                 | placed          | HSA21 | 36.8  |
| 26 | MORC3            | 564.37 | 0.56                                 | placed          | HSA21 | 36.61 |
| 26 | CBR1             | 570.42 | 2.51                                 | frame           | HSA21 | 36.36 |
| 26 | KCNJ6            | 582.97 | 1.08                                 | frame           | HSA21 | 37.92 |
| 26 | DYRK1A           | 598.41 | 0.91                                 | frame           | HSA21 | 37.66 |
| 26 | TKY3385          | 607.37 | 0.91                                 | frame           | HSA21 | 37.2  |
| 26 | CH241-100G23_SP6 | 627.2  | 2.2                                  | placed          | HSA21 | 38.8  |
| 26 | ERG              | 633.51 | 2.42                                 | placed          | HSA21 | 38.68 |
| 26 | ETS2             | 636.56 | 4.29                                 | frame           | HSA21 | 39.10 |
| 26 | SH3BGR           | 649.54 | 4.29                                 | frame           | HSA21 | 39.74 |
| 26 | TKY664           | 659.82 | 4.56                                 | placed          | HSA21 | 39.9  |
| 26 | UMNe542          | 666.64 | 8.08                                 | frame           | HSA21 | 40.7  |
| 26 | MX1              | 684.4  | 7.88                                 | frame           | HSA21 | 41.72 |
| 26 | UMNe434          | 684.4  | 7.88                                 | frame_identical |       |       |
| 26 | CSTB             | 703.38 | 2.06                                 | frame           | HSA21 | 44.02 |
| 26 | S100B            | 719.06 | 1.34                                 | frame           | HSA21 | 46.84 |
| 26 | TKY767           | 741.93 | 1.34                                 | frame           |       |       |
| 26 | SAMSN1           | ---    | [CH241-114I13_SP6 - C21orf34]        | binned          | HSA21 | 14.78 |
| 26 | TKY766           | ---    | [CH241-112C9_SP6 - CH241-111N13_SP6] | binned          |       |       |
| 26 | UMNe559          | ---    | [UMNe588 - CH241-112C9_SP6]          | binned          |       |       |
| 26 | IL10RB           | ---    | [UBE3AP2 - CH241-115F4_SP6]          | binned          | HSA21 | 33.56 |
| 26 | TKY1233          | ---    | [COR099 - OLIG1]                     | binned          | HSA21 | 31.4  |

| Horse Chr. | Marker | Map Position (cR) | Placement LOD        | Assignment | Human Chr. | Human Mb (Build 36.1) |
|------------|--------|-------------------|----------------------|------------|------------|-----------------------|
| 27         | TKY437 | 0                 | 1.86                 | frame      |            |                       |
| 27         | VDAC3  | 26.65             | 1.86                 | frame      | HSA8       | 42.37                 |
| 27         | FNTA   | 36.82             | 2.58                 | placed     | HSA8       | 43.03                 |
| 27         | GINS4  | 46.97             | 2.03                 | frame      | HSA8       | 41.51                 |
| 27         | ANK1   | 52.41             | 2.23                 | placed     | HSA8       | 41.63                 |
| 27         | INDO   | 69.71             | 2.03                 | frame      | HSA8       | 39.89                 |
| 27         | COR031 | --                | [p-terminal - VDAC3] | binned     |            |                       |

|    |                 |        |                           |                 |      |        |
|----|-----------------|--------|---------------------------|-----------------|------|--------|
| 27 | TKY789          | --     | [GINS4 - q-terminal]      | binned          | HSA8 | 41.7   |
| 27 | STAR            | 0      | 0                         | frame           | HSA8 | 38.12  |
| 27 | FGFR1           | 0      | 0                         | frame_identical | HSA8 | 38.39  |
| 27 | TKY1137         | 0      | 0                         | frame_identical |      |        |
| 27 | TKY764          | 0      | 0                         | frame_identical |      |        |
| 27 | ADRB3           | 0      | 0                         | frame_identical | HSA8 | 37.94  |
| 27 | ASH2L           | 0      | 0                         | frame_identical | HSA8 | 38.08  |
| 27 | ERLIN2          | --     | [p-terminal - q-terminal] | binned          | HSA8 | 37.71  |
| 27 | TM2D2           | --     | [p-terminal - q-terminal] | binned          | HSA8 | 38.97  |
| 27 | RBM13           | 0      | 4.39                      | frame           | HSA8 | 33.46  |
| 27 | TKY804          | 10.39  | 1.64                      | placed          | HSA8 | 32.7   |
| 27 | 27STS02         | 19.67  | 2.02                      | frame           |      |        |
| 27 | UMNe186         | 33     | 1.83                      | frame           |      |        |
| 27 | UMNe523         | 50.79  | 1.83                      | frame           | HSA8 | 31.4   |
| 27 | GTF2E2          | 70.48  | 2.36                      | placed          | HSA8 | 30.56  |
| 27 | TMEM66          | 73.88  | 5.49                      | frame           | HSA8 | 30.04  |
| 27 | UMNe476         | 73.88  | 5.49                      | frame_identical |      |        |
| 27 | UCDEQ005        | 73.88  | 5.49                      | frame_identical |      |        |
| 27 | 27CA001         | 84.14  | 5.49                      | frame           |      |        |
| 27 | DLC1            | 107.07 | 8.13                      | frame           | HSA8 | 12.99  |
| 27 | COR040          | 112.79 | 1.91                      | placed          |      |        |
| 27 | PDGFRL          | 143.32 | 3.85                      | frame           | HSA8 | 17.48  |
| 27 | HMS45           | 146.45 | 2.39                      | placed          | HSA8 | 16.7   |
| 27 | TKY603          | 146.45 | 2.39                      | placed          |      |        |
| 27 | CH241-34124_SP6 | 152.57 | 3.85                      | frame           |      |        |
| 27 | TKY3012         | 161.56 | 0.27                      | placed          | HSA4 | 188.8  |
| 27 | SLC25A4         | 184.05 | 1.58                      | frame           | HSA4 | 186.30 |
| 27 | PDLIM3          | 187.05 | 0.35                      | placed          | HSA4 | 186.66 |
| 27 | TKY480          | 190.1  | 0.83                      | placed          |      |        |
| 27 | F11             | 190.1  | 0.83                      | placed          | HSA4 | 187.42 |
| 27 | CDKN2AIP        | 193.23 | 1.58                      | frame           | HSA4 | 184.60 |
| 27 | TKY576          | 193.23 | 1.58                      | frame_identical | HSA4 | 185.6  |
| 27 | LEX005          | 193.23 | 1.58                      | frame_identical | HSA4 | 185    |
| 27 | TKY288          | 193.23 | 1.58                      | frame_identical | HSA4 | 185    |
| 27 | UMNe379         | 196.36 | 0.37                      | placed          |      |        |
| 27 | UMNe258         | 202.8  | 0.42                      | placed          | HSA4 | 183.6  |
| 27 | AHT082          | 206.11 | 0.77                      | placed          | HSA4 | 183.6  |
| 27 | DCTD            | 240.18 | 3.44                      | frame           | HSA4 | 184.05 |
| 27 | UMNe161         | 279.18 | 1.37                      | placed          | HSA4 | 183.1  |
| 27 | VHL149          | 332.34 | 1.58                      | placed          |      |        |
| 27 | TKY612          | 354.65 | 3.88                      | frame           | HSA4 | 180.4  |
| 27 | AGA             | 366.04 | 3.88                      | frame           | HSA4 | 178.59 |
| 27 | TKY828          | 381.17 | 1.97                      | frame           |      |        |
| 27 | ASB5            | 400.25 | 1.97                      | frame           |      |        |
| 27 | SPAG11B         | 415.04 | 1.98                      | frame           | HSA8 | 7.30   |
| 27 | TKY1152         | 443.15 | 0.42                      | placed          | HSA8 | 4.7    |
| 27 | UMNe553         | 450.01 | 6.32                      | frame           |      |        |

|    |                 |        |                              |        |      |        |
|----|-----------------|--------|------------------------------|--------|------|--------|
| 27 | MYOM2           | 491.23 | 6.32                         | frame  | HSA8 | 1.98   |
| 27 | CLN8            | 494.29 | 1.15                         | placed | HSA8 | 1.70   |
| 27 | ASB38           | ---    | [UMNe523 - 27CA001]          | binned | HSA8 | 29.6   |
| 27 | AHT074          | ---    | [DLC1 - CH241-34I24_SP6]     | binned |      |        |
| 27 | CH241-3I14_T7   | ---    | [PDGFRL - SLC25A4]           | binned |      |        |
| 27 | TKY315          | ---    | [DLC1 - CH241-34I24_SP6]     | binned | HSA8 | 17.5   |
| 27 | CH241-84O15_SP6 | ---    | [DLC1 - CH241-34I24_SP6]     | binned |      |        |
| 27 | CH241-10E15_SP6 | ---    | [DLC1 - CH241-34I24_SP6]     | binned |      |        |
| 27 | UMNe313         | ---    | [DLC1 - CH241-34I24_SP6]     | binned | HSA4 | 189.7  |
| 27 | CASP3           | ---    | [CH241-34I24_SP6 - CDKN2AIP] | binned | HSA4 | 185.79 |
| 27 | UMNe117         | ---    | [CDKN2AIP - TKY612]          | binned |      |        |
| 27 | TKY431          | ---    | [SLC25A4 - DCTD]             | binned | HSA4 | 185.7  |
| 27 | PCM1            | ---    | [DLC1 - CH241-34I24_SP6]     | binned | HSA8 | 17.82  |
| 27 | NRG1            | ---    | [RBM13 - UMNe186]            | binned | HSA8 | 32.53  |
| 27 | COR017          | ---    | [SPAG11B - MYOM2]            | binned |      |        |
| 27 | 27STS01         | ---    | [UMNe553 - q-terminal]       | binned |      |        |

| Horse Chr. | Marker   | Map Position (cR) | Placement LOD | Assignment | Human Chr. | Human Mb (Build 36.1) |
|------------|----------|-------------------|---------------|------------|------------|-----------------------|
| 28         | TPH2     | 0                 | 2.05          | frame      | HSA12      | 70.62                 |
| 28         | TKY333   | 42.81             | 2.92          | frame      | HSA12      | 72.8                  |
| 28         | GLIPR1   | 58.7              | 2.92          | frame      | HSA12      | 74.16                 |
| 28         | CSRP2    | 65.18             | 4.83          | placed     | HSA12      | 75.78                 |
| 28         | NVHEQ054 | 71.65             | 3.9           | placed     |            |                       |
| 28         | MYF5     | 101.37            | 2.58          | frame      | HSA12      | 79.63                 |
| 28         | FLJ21963 | 105.03            | 1.77          | placed     | HSA12      | 80.00                 |
| 28         | TKY808   | 127.63            | 2.58          | frame      |            |                       |
| 28         | HTG30    | 166               | 1.92          | placed     |            |                       |
| 28         | UM003    | 169.67            | 1.93          | placed     | HSA12      | 82.7                  |
| 28         | KITLG    | 177.23            | 5.04          | frame      | HSA12      | 87.41                 |
| 28         | LUM      | 200.15            | 1.85          | placed     | HSA12      | 90.02                 |



|    |          |        |                  |                 |       |        |
|----|----------|--------|------------------|-----------------|-------|--------|
| 28 | DCN      | 206.8  | 3.9              | frame           | HSA12 | 90.06  |
| 28 | BTG1     | 210.02 | 2.03             | placed          | HSA12 | 91.06  |
| 28 | SOCS2    | 230.8  | 2.04             | frame           | HSA12 | 92.49  |
| 28 | METAP2   | 234.04 | 1.13             | placed          | HSA12 | 94.39  |
| 28 | IKIP     | 246.4  | 2.15             | placed          | HSA12 | 97.53  |
| 28 | TKY1153  | 246.4  | 2.29             | placed          | HSA12 | 95.8   |
| 28 | TKY768   | 246.4  | 2.29             | placed          | HSA12 | 96     |
| 28 | APAF1    | 249.96 | 2.04             | frame           | HSA12 | 97.56  |
| 28 | TKY873   | 268.52 | 1.33             | placed          |       |        |
| 28 | PMCH     | 275.12 | 0.2              | placed          | HSA12 | 101.11 |
| 28 | IGF1     | 275.12 | 0.19             | placed          | HSA12 | 101.31 |
| 28 | TKY877   | 278.3  | 1.7              | frame           |       |        |
| 28 | UMNe354  | 281.56 | 0.41             | placed          |       |        |
| 28 | TKY872   | 288.41 | 1.7              | frame           | HSA12 | 104.13 |
| 28 | GLT8D2   | 303.08 | 2.03             | frame           | HSA12 | 102.91 |
| 28 | NFYB     | 303.08 | 2.03             | frame_identical | HSA12 | 103.03 |
| 28 | PWP1     | 314.06 | 2.37             | placed          | HSA12 | 106.60 |
| 28 | TIMP3    | 317.59 | 3.93             | frame           | HSA22 | 31.53  |
| 28 | MCM5     | 335.39 | 4.23             | frame           | HSA22 | 34.13  |
| 28 | TST      | 338.61 | 2.55             | placed          | HSA22 | 35.74  |
| 28 | TKY493   | 338.61 | 2.54             | placed          |       |        |
| 28 | TKY1168  | 338.61 | 2.55             | placed          | HSA22 | 36.4   |
| 28 | LGALS1   | 345.26 | 2.52             | frame           | HSA22 | 36.40  |
| 28 | DDX17    | 359.02 | 2.08             | frame           | HSA22 | 37.21  |
| 28 | ACO2     | 373.22 | 2.08             | frame           | HSA22 | 40.20  |
| 28 | CYP2D@   | 376.75 | 2.34             | placed          | HSA22 | 40.85  |
| 28 | TKY364   | 380.39 | 0.65             | placed          | HSA22 | 42.5   |
| 28 | TKY467   | 392.2  | 1.56             | frame           | HSA22 | 43.8   |
| 28 | PPARA    | 420.03 | 3.51             | frame           | HSA22 | 44.93  |
| 28 | UMNe345  | 420.03 | 3.51             | frame_identical |       |        |
| 28 | UCDEQ425 | 430.33 | 3.51             | frame           |       |        |
| 28 | ARSA     | 456.24 | 2.47             | frame           | HSA22 | 49.41  |
| 28 | KRR1     | ---    | [TKY333 - MYF5]  | binned          | HSA12 | 74.18  |
| 28 | TKY1023  | ---    | [SOCS2 - TKY877] | binned          | HSA12 | 97.6   |
| 28 | UMNe166  | ---    | [GLT8D2 - MCM5]  | binned          |       |        |
| 28 | TKY485   | ---    | [SOCS2 - TKY877] | binned          |       |        |
| 28 | TKY425   | ---    | [APAF1 - TKY872] | binned          | HSA12 | 104.9  |
| 28 | TKY515   | ---    | [GLT8D2 - MCM5]  | binned          |       |        |
| 28 | TKY1060  | ---    | [MCM5 - DDX17]   | binned          |       |        |
| 28 | UMNe465  | ---    | [LGALS1 - ACO2]  | binned          |       |        |
| 28 | TKY3400  | ---    | [LGALS1 - ACO2]  | binned          | HSA22 | 36.4   |
| 28 | ATF4     | ---    | [LGALS1 - ACO2]  | binned          | HSA22 | 38.25  |

|    |         |     |                 |        |       |       |
|----|---------|-----|-----------------|--------|-------|-------|
| 28 | TOMM22  | --- | [LGALS1 - ACO2] | binned | HSA22 | 37.41 |
| 28 | TKY299  | --- | [MCM5 - DDX17]  | binned |       |       |
| 28 | TKY1080 | --- | [ACO2 - PPARA]  | binned |       |       |

| Horse Chr. | Marker           | Map Position (cR) | Placement LOD | Assignment      | Human Chr. | Human Mb (Build 36.1) |
|------------|------------------|-------------------|---------------|-----------------|------------|-----------------------|
| 29         | LEX018           | 0                 | 3.61          | frame           |            |                       |
| 29         | CREM             | 35.58             | 3.61          | frame           | HSA10      | 35.46                 |
| 29         | CH241-101F21_SP6 | 60.09             | 2.41          | frame           |            |                       |
| 29         | UMNe218          | 74.88             | 2.41          | frame           | HSA10      | 35.1                  |
| 29         | COR082           | 87.12             | 4.27          | frame           | HSA10      | 34.1                  |
| 29         | COR021           | 105.62            | 8.49          | frame           | HSA10      | 32.34                 |
| 29         | KIF5B            | 114.48            | 4.9           | placed          | HSA10      | 32.34                 |
| 29         | ZEB1             | 135.61            | 0.19          | placed          | HSA10      | 31.65                 |
| 29         | UMNe602          | 145.92            | 3.56          | placed          |            |                       |
| 29         | ARHGAP12         | 148.97            | 8.93          | frame           | HSA10      | 32.14                 |
| 29         | SVIL             | 162.21            | 8.93          | frame           | HSA10      | 29.79                 |
| 29         | BAMBI            | 178.79            | 7.33          | frame           | HSA10      | 29.01                 |
| 29         | TKY900           | 196.39            | 0.7           | placed          |            |                       |
| 29         | MPP7             | 206.94            | 6.73          | frame           | HSA10      | 28.38                 |
| 29         | MASTL            | 220.62            | 5.33          | frame           | HSA10      | 27.48                 |
| 29         | TKY913           | 231.82            | 0.23          | placed          |            |                       |
| 29         | ACBD5            | 246.8             | 1.19          | placed          | HSA10      | 27.53                 |
| 29         | GAD2             | 259.74            | 6.28          | frame           | HSA10      | 26.55                 |
| 29         | C10orf97         | 275.92            | 4.19          | frame           | HSA10      | 15.86                 |
| 29         | MLLT10           | 282.39            | 1.58          | placed          | HSA10      | 21.86                 |
| 29         | TKY1866          | 293.06            | 1.11          | placed          | HSA10      | 22.8                  |
| 29         | BMI1             | 296.56            | 4.19          | frame           | HSA10      | 22.65                 |
| 29         | COMMD3           | 296.56            | 4.19          | frame_identical | HSA10      | 22.65                 |
| 29         | UMNe253          | 300.03            | 0.11          | placed          |            |                       |
| 29         | TKY859           | 331.07            | 1.63          | placed          |            |                       |
| 29         | ARL5B            | 370.09            | 4.17          | frame           | HSA10      | 18.99                 |
| 29         | VIM              | 380.09            | 4.17          | frame           | HSA10      | 17.31                 |
| 29         | TKY628           | 380.09            | 4.17          | frame_identical |            |                       |
| 29         | CUBN             | 390.57            | 0.55          | placed          | HSA10      | 16.91                 |
| 29         | OPTN             | 422.03            | 0.41          | placed          | HSA10      | 13.18                 |
| 29         | FRMD4A           | 432.21            | 1.3           | placed          | HSA10      | 13.73                 |
| 29         | 29STS01          | 435.4             | 1.87          | frame           |            |                       |
| 29         | COR027           | 441.79            | 0.28          | placed          | HSA10      | 12.5                  |
| 29         | TKY478           | 451.67            | 1.87          | frame           |            |                       |
| 29         | SEC61A2          | 468.82            | 1.98          | frame           | HSA10      | 12.21                 |
| 29         | TKY112           | 482.92            | 1.98          | frame           |            |                       |
| 29         | TKY819           | 507.26            | 4.02          | placed          | HSA10      | 10.9                  |
| 29         | TKY989           | 530.68            | 1.94          | frame           |            |                       |
| 29         | GATA3            | 541.5             | 1.94          | frame           | HSA10      | 8.14                  |
| 29         | VIASH39          | 552.69            | 0.35          | placed          |            |                       |

|    |         |        |                    |        |       |       |
|----|---------|--------|--------------------|--------|-------|-------|
| 29 | TKY325  | 574.53 | 4.58               | placed |       |       |
| 29 | GDI2    | 574.53 | 4.58               | placed | HSA10 | 5.85  |
| 29 | NET1    | 581.1  | 3.39               | frame  | HSA10 | 5.48  |
| 29 | AKR1C3  | 590.97 | 3.39               | frame  | HSA10 | 5.13  |
| 29 | HP12    | 594.08 | 2.19               | placed |       |       |
| 29 | ASB43   | 594.08 | 2.26               | placed |       |       |
| 29 | WDR37   | 626.34 | 5.82               | frame  | HSA10 | 1.09  |
| 29 | PLXDC2  | ---    | [GAD2 - BMI1]      | binned | HSA10 | 20.15 |
| 29 | TKY332  | ---    | [C10orf97 - ARL5B] | binned |       |       |
| 29 | TKY715  | ---    | [C10orf97 - ARL5B] | binned |       |       |
| 29 | TKY3085 | ---    | [C10orf97 - ARL5B] | binned | HSA10 | 24.1  |
| 29 | ITIH2   | ---    | [TKY989 - NET1]    | binned | HSA10 | 7.79  |
| 29 | PFKFB3  | ---    | [GATA3 - AKR1C3]   | binned | HSA10 | 6.28  |

| Horse Chr. | Marker   | Map Position (cR) | Placement LOD | Assignment      | Human Chr. | Human Mb (Build 36.1) |
|------------|----------|-------------------|---------------|-----------------|------------|-----------------------|
| 30         | ADSS     | 0                 | 4.5           | frame           | HSA1       | 242.64                |
| 30         | HNRPU    | 15.51             | 0.26          | placed          | HSA1       | 243.08                |
| 30         | LEX025   | 43.47             | 4.5           | frame           | HSA1       | 239.3                 |
| 30         | TKY897   | 66.44             | 3.07          | placed          |            |                       |
| 30         | FH       | 73.76             | 6.9           | frame           | HSA1       | 239.73                |
| 30         | CDC42BPA | 92.77             | 5.36          | frame           | HSA1       | 225.25                |
| 30         | PSEN2    | 92.77             | 5.36          | frame_identical | HSA1       | 225.13                |
| 30         | HTG27    | 96.4              | 2.13          | placed          |            |                       |
| 30         | EPHX1    | 107.72            | 2.91          | placed          | HSA1       | 224.08                |
| 30         | SRP9     | 122.97            | 5.36          | frame           | HSA1       | 224.03                |
| 30         | LBR      | 152.14            | 0.83          | frame           | HSA1       | 223.66                |
| 30         | WDR26    | 176.06            | 0.83          | frame           | HSA1       | 222.64                |
| 30         | DEGS1    | 182.94            | 1.94          | placed          | HSA1       | 222.44                |
| 30         | UMNe463  | 225.24            | 4             | frame           |            |                       |
| 30         | HLX1     | 256.27            | 0.21          | placed          | HSA1       | 219.12                |
| 30         | HMS18    | 277.84            | 0.29          | placed          | HSA1       | 217.8                 |
| 30         | DUSP10   | 281.34            | 3.38          | frame           | HSA1       | 219.94                |
| 30         | TKY762   | 281.34            | 3.38          | frame_identical | HSA1       | 218.2                 |
| 30         | UMNe530  | 284.74            | 2.23          | placed          | HSA1       | 218.2                 |
| 30         | IARS2    | 294.79            | 3.38          | frame           | HSA1       | 218.33                |
| 30         | TAF1A    | 307.57            | 3.89          | frame           | HSA1       | 220.80                |
| 30         | ESRRG    | 352.55            | 1.01          | frame           | HSA1       | 214.74                |
| 30         | UMNe078  | 355.63            | 0.81          | placed          |            |                       |
| 30         | GPATCH2  | 387.44            | 1.01          | frame           | HSA1       | 215.67                |
| 30         | ZC3H11A  | 422.65            | 1.42          | frame           | HSA1       | 202.04                |
| 30         | VHL20    | 456.29            | 5.78          | frame           |            |                       |
| 30         | RGS1     | 471.55            | 2.19          | frame           | HSA1       | 190.81                |

|    |          |        |                        |                 |      |        |
|----|----------|--------|------------------------|-----------------|------|--------|
| 30 | TKY658   | 474.41 | 0.12                   | placed          | HSA1 | 189.4  |
| 30 | RGS2     | 474.41 | 0.12                   | placed          | HSA1 | 191.04 |
| 30 | CDC73    | 483.23 | 1.2                    | frame           | HSA1 | 191.36 |
| 30 | AHT023   | 494.8  | 1.2                    | frame           |      |        |
| 30 | LEX075   | 538.25 | 1.99                   | placed          | HSA1 | 196.1  |
| 30 | UMNe088  | 538.25 | 1.97                   | placed          |      |        |
| 30 | UCDEQ455 | 538.25 | 1.97                   | placed          |      |        |
| 30 | ZNF281   | 541.01 | 7.48                   | frame           | HSA1 | 198.64 |
| 30 | UMNe340  | 552.22 | 2.1                    | frame           | HSA1 | 197.6  |
| 30 | TKY1178  | 552.22 | 2.1                    | frame_identical | HSA1 | 197.6  |
| 30 | CACNA1S  | 554.92 | 0.38                   | placed          | HSA1 | 199.28 |
| 30 | TNNI1    | 560.46 | 2.1                    | frame           | HSA1 | 199.64 |
| 30 | NAV1     | 571.47 | 2.41                   | frame           | HSA1 | 199.88 |
| 30 | CYB5R1   | 579.55 | 2.41                   | frame           | HSA1 | 201.20 |
| 30 | TKY1022  | 594.07 | 4.92                   | frame           |      |        |
| 30 | AHT062   | ---    | [LEX025 -<br>CDC42BPA] | binned          |      |        |
| 30 | RGS18    | ---    | [VHL20 -<br>CDC73]     | binned          | HSA1 | 190.39 |

| Horse Chr. | Marker           | Map Position (cR) | Placement LOD | Assignment      | Human Chr. | Human Mb (Build 36.1) |
|------------|------------------|-------------------|---------------|-----------------|------------|-----------------------|
| 31         | THBS2            | 0                 | 4.12          | frame           | HSA6       | 169.36                |
| 31         | SMOC2            | 18.67             | 4.29          | placed          | HSA6       | 168.58                |
| 31         | BRP44L           | 28.16             | 0.17          | placed          | HSA6       | 166.70                |
| 31         | RNAS22           | 32.64             | 0.96          | frame           | HSA6       | 167.26                |
| 31         | TKY668           | 46.71             | 0.26          | placed          | HSA6       | 161.50                |
| 31         | TKY368           | 46.71             | 0.26          | placed          | HSA6       | 163.00                |
| 31         | MAP3K4           | 46.71             | 0.25          | placed          | HSA6       | 161.33                |
| 31         | CH241-100I20_SP6 | 51.42             | 0.96          | frame           |            |                       |
| 31         | PLG              | 51.42             | 0.96          | frame_identical | HSA6       | 161.04                |
| 31         | UMNe424          | 82.67             | 3.16          | frame           |            |                       |
| 31         | VIL2             | 106.07            | 5.51          | frame           | HSA6       | 159.11                |
| 31         | SNX9             | 123.11            | 1.66          | placed          | HSA6       | 158.16                |
| 31         | AHT033           | 135.89            | 4.57          | placed          | HSA6       | 158.3                 |
| 31         | TKY274           | 145.33            | 5.51          | frame           |            |                       |
| 31         | COR038           | 145.33            | 5.51          | frame_identical |            |                       |
| 31         | TKY755           | 150.03            | 0.12          | placed          | HSA6       | 157.1                 |
| 31         | WTAP             | 178               | 1.74          | placed          | HSA6       | 160.07                |
| 31         | TKY919           | 216.97            | 0.13          | placed          |            |                       |
| 31         | VIP              | 222.26            | 3.53          | frame           | HSA6       | 153.11                |
| 31         | UMNe368          | 222.26            | 3.53          | frame_identical |            |                       |
| 31         | VIASH21          | 222.26            | 3.53          | frame_identical | HSA6       | 154.1                 |
| 31         | ESR1             | 243.19            | 3.53          | frame           | HSA6       | 152.17                |
| 31         | UMNe546          | 258.9             | 2.26          | placed          |            |                       |
| 31         | KATNA1           | 264.5             | 2.77          | frame           | HSA6       | 149.96                |
| 31         | PCMT1            | 264.5             | 2.77          | frame_identical | HSA6       | 150.11                |
| 31         | CH241-102M06_T7  | 270.53            | 1.12          | placed          | HSA6       | 147.30                |
| 31         | TKY105           | 288.65            | 2.77          | frame           |            |                       |

|    |                  |        |                           |                 |      |        |
|----|------------------|--------|---------------------------|-----------------|------|--------|
| 31 | TKY278           | 293.64 | 1                         | placed          |      |        |
| 31 | AHT034           | 321.45 | 3.98                      | frame           | HSA6 | 144.6  |
| 31 | PLAGL1           | 331.36 | 2.6                       | placed          | HSA6 | 144.30 |
| 31 | FUCA2            | 335.83 | 2.45                      | frame           | HSA6 | 143.86 |
| 31 | UMNe181          | 335.83 | 2.45                      | frame_identical |      |        |
| 31 | C6orf55          | 340.1  | 2.63                      | placed          | HSA6 | 142.51 |
| 31 | TKY2302          | 340.1  | 2.63                      | placed          | HSA6 | 143.1  |
| 31 | CH241-102M02_SP6 | 349.47 | 2.99                      | placed          | HSA6 | 143.80 |
| 31 | UMNe382          | 354.2  | 2.45                      | frame           |      |        |
| 31 | UMNe157          | 368.27 | 3.02                      | frame           |      |        |
| 31 | CH241-100J19_SP6 | 381.66 | 3.02                      | frame           | HSA6 | 139.90 |
| 31 | PSMB1            | ---    | [p-terminal -<br>RNASET2] | binned          | HSA6 | 170.69 |
| 31 | CH241-100B15_SP6 | ---    | [ESR1 -<br>TKY105]        | binned          |      |        |
| 31 | CH241-101A08_SP6 | ---    | [TKY274 -<br>ESR1]        | binned          |      |        |
| 31 | HIVEP2           | ---    | [FUCA2 -<br>UMNe157]      | binned          | HSA6 | 143.11 |
| 31 | TKY1011          | ---    | [FUCA2 -<br>UMNe157]      | binned          | HSA6 | 143.2  |

| Horse Chr. | Marker          | Map Position (cR) | Placement LOD             | Assignment | Human Chr. | Human Mb (Build 36.1) |
|------------|-----------------|-------------------|---------------------------|------------|------------|-----------------------|
| X          | CXYorf3         | 0                 | 0.85                      | frame      | HSAX       | 1.67                  |
| X          | PLCXD1          | 16.06             | 1.14                      | placed     | HSAX       | 0.13                  |
| X          | SLC25A6         | 21.8              | 0.85                      | frame      | HSAX       | 1.47                  |
| X          | CD99            | 33.39             | 1.37                      | placed     | HSAX       | 2.62                  |
| X          | XG              | 36.13             | 0.12                      | placed     | HSAX       | 2.68                  |
| X          | ARSE            | 38.82             | 2.21                      | frame      | HSAX       | 2.86                  |
| X          | GYG2            | 41.56             | 2.74                      | placed     | HSAX       | 2.76                  |
| X          | MXRA5           | 47.06             | 0.79                      | frame      | HSAX       | 3.24                  |
| X          | PRKX            | 57.99             | 1.06                      | placed     | HSAX       | 3.53                  |
| X          | CH241-144B9_SP6 | 60.55             | 0.79                      | frame      |            |                       |
| X          | TKY915          | 71.3              | 0.38                      | placed     |            |                       |
| X          | ZBED1           | ---               | [CXYorf3 -<br>ARSE]       | binned     | HSAX       | 2.41                  |
| X          | ASMT            | ---               | [p-terminal -<br>SLC25A6] | binned     | HSAX       | 1.67                  |
| X          | CH241-178I7_T7  | 0                 | 1.44                      | frame      |            |                       |
| X          | NLGN4X          | 34.87             | 0.71                      | frame      | HSAX       | 5.82                  |
| X          | UMNe360         | 71.15             | 0.66                      | placed     |            |                       |
| X          | HDHD1A          | 88.02             | 0.71                      | frame      | HSAX       | 6.98                  |
| X          | TKY1103         | 102.37            | 1.27                      | placed     | HSAX       | 7.1                   |
| X          | STS             | 113.11            | 3.69                      | frame      | HSAX       | 7.15                  |
| X          | UMNe597         | 155.94            | 0.28                      | placed     |            |                       |
| X          | AHT099          | 197.9             | 1.58                      | frame      |            |                       |
| X          | TKY2732         | 229.9             | 0.39                      | placed     |            |                       |
| X          | KAL1            | 237.94            | 0.43                      | placed     | HSAX       | 8.46                  |

|   |          |        |                      |                 |      |       |
|---|----------|--------|----------------------|-----------------|------|-------|
| X | TBL1X    | 242.13 | 0.25                 | placed          | HSAX | 9.39  |
| X | MID1     | 246.29 | 1.77                 | frame           | HSAX | 10.38 |
| X | SHROOM2  | 246.29 | 1.77                 | frame_identical | HSAX | 9.71  |
| X | MSL3L1   | 250.45 | 1.94                 | placed          | HSAX | 11.69 |
| X | AMELX    | 250.45 | 1.94                 | placed          | HSAX | 11.22 |
| X | TLR7     | 254.47 | 1.43                 | placed          | HSAX | 12.80 |
| X | TMSB4X   | 254.47 | 2.47                 | placed          | HSAX | 12.90 |
| X | GPM6B    | 254.47 | 2.47                 | placed          | HSAX | 13.70 |
| X | GLRA2    | 258.31 | 1.77                 | frame           | HSAX | 14.46 |
| X | UMNe202  | 258.31 | 1.77                 | frame_identical | HSAX | 14.2  |
| X | TKY836   | 275.73 | 0.5                  | placed          | HSAX | 13.5  |
| X | PIGA     | 304.72 | 2.36                 | placed          | HSAX | 15.25 |
| X | TKY1084  | 313.91 | 2.32                 | placed          | HSAX | 15.8  |
| X | CTPS2    | 318.71 | 2.25                 | frame           | HSAX | 16.52 |
| X | COR074   | 328.86 | 2.57                 | placed          | HSAX | 17.4  |
| X | SCML2    | 328.86 | 2.57                 | placed          | HSAX | 18.17 |
| X | TKY3315  | 333.67 | 2.25                 | frame           |      |       |
| X | SMS      | 338.48 | 2.57                 | placed          | HSAX | 21.87 |
| X | ACOT9    | 343.54 | 1.63                 | placed          | HSAX | 23.64 |
| X | PDHA1    | 343.54 | 2.58                 | placed          | HSAX | 19.27 |
| X | RPS6KA3  | 343.54 | 2.58                 | placed          | HSAX | 20.08 |
| X | CNKS2    | 343.54 | 2.58                 | placed          | HSAX | 21.30 |
| X | EIF2S3   | 372.33 | 0.13                 | placed          | HSAX | 23.98 |
| X | ARX      | 395.13 | 2.08                 | frame           | HSAX | 24.93 |
| X | SAT1     | 395.13 | 2.08                 | frame_identical | HSAX | 23.71 |
| X | LEX028   | 395.13 | 2.08                 | frame_identical | HSAX | 24.2  |
| X | UCDEQ502 | 404.73 | 1.06                 | placed          |      |       |
| X | LEX026   | 419.14 | 2.61                 | placed          | HSAX | 25    |
| X | TKY753   | 428.25 | 2.08                 | frame           |      |       |
| X | UMNe058  | 448.49 | 2.08                 | frame           | HSAX | 27.7  |
| X | NR0B1    | 468.79 | 1.32                 | frame           | HSAX | 30.23 |
| X | TKY959   | 478.94 | 2.49                 | placed          |      |       |
| X | DMD      | 490.43 | 1.32                 | frame           | HSAX | 31.05 |
| X | CLCN4    | --     | [AHT099 -<br>GLRA2]  | binned          | HSAX | 10.09 |
| X | EGFL6    | --     | [MID1 -<br>CTPS2]    | binned          | HSAX | 13.50 |
| X | TLR8     | --     | [MID1 -<br>CTPS2]    | binned          | HSAX | 12.83 |
| X | UMNe511  | --     | [MID1 -<br>CTPS2]    | binned          |      |       |
| X | UMNe437  | --     | [HDHD1A -<br>AHT099] | binned          |      |       |
| X | UMNe091  | --     | [HDHD1A -<br>AHT099] | binned          |      |       |
| X | XCA001   | --     | [CTPS2 -<br>ARX]     | binned          |      |       |
| X | PRDX4    | --     | [CTPS2 -<br>ARX]     | binned          | HSAX | 23.60 |
| X | NVHEQ075 | --     | [CTPS2 -<br>ARX]     | binned          | HSAX | 23.0  |
| X | RBBP7    | --     | [CTPS2 -             | binned          | HSAX | 16.77 |

|   |          |        |                     |                 |      |       |
|---|----------|--------|---------------------|-----------------|------|-------|
|   |          |        | ARX]                |                 |      |       |
| X | GPR64    | --     | [CTPS2 -<br>ARX]    | binned          | HSAX | 18.92 |
| X | PPEF1    | --     | [CTPS2 -<br>ARX]    | binned          | HSAX | 18.62 |
| X | UMNe522  | --     | [UMNe058 -<br>DMD]  | binned          |      |       |
| X | GK       | --     | [UMNe058 -<br>DMD]  | binned          | HSAX | 30.58 |
| X | LEX027   | --     | [UMNe058 -<br>DMD]  | binned          |      |       |
| X | UCDEQ428 | --     | [AHT099 -<br>GLRA2] | binned          |      |       |
| X | TKY270   | 0      | 0.56                | placed          |      |       |
| X | UMNe386  | 10.34  | 2.19                | placed          |      |       |
| X | OTC      | 51.25  | 0.65                | placed          | HSAX | 38.10 |
| X | TKY514   | 91.81  | 1.72                | placed          | HSAX | 41.7  |
| X | TMEM47   | 121.2  | 3.49                | frame           | HSAX | 34.56 |
| X | CRSP2    | 134.83 | 2.44                | placed          | HSAX | 40.39 |
| X | SRPX     | 147.48 | 1.01                | placed          | HSAX | 37.89 |
| X | DDX3X    | 159.97 | 3.49                | frame           | HSAX | 41.08 |
| X | USP9X    | 159.97 | 3.49                | frame_identical | HSAX | 40.87 |
| X | MAOB     | 178.77 | 4.1                 | frame           | HSAX | 43.51 |
| X | MAOA     | 178.77 | 4.1                 | frame_identical | HSAX | 43.40 |
| X | EFHC2    | 203.74 | 3.98                | frame           | HSAX | 43.89 |
| X | LEX010   | 222.53 | 3.98                | frame           | HSAX | 44.5  |
| X | USP11    | 245.75 | 2.77                | frame           | HSAX | 46.98 |
| X | TKY1996  | 250.65 | 1.9                 | placed          |      |       |
| X | AKAP4    | 250.65 | 1.91                | placed          | HSAX | 49.84 |
| X | ALDH2ps  | 250.65 | 1.91                | placed          |      |       |
| X | RBM3     | 250.65 | 1.91                | placed          | HSAX | 48.32 |
| X | TIMP1    | 250.65 | 1.91                | placed          | HSAX | 47.33 |
| X | WDR45    | 261.59 | 1.56                | frame           | HSAX | 48.82 |
| X | TKY1073  | 292.7  | 1.6                 | placed          |      |       |
| X | MAGED1   | 326.59 | 2.11                | placed          | HSAX | 51.56 |
| X | TKY1105  | 338.36 | 2.01                | frame           | HSAX | 54.8  |
| X | MAGED4   | 348.15 | 0.14                | placed          | HSAX | 51.82 |
| X | COR091   | 361.37 | 2.01                | frame           | HSAX | 50.9  |
| X | NUDT11   | 365.41 | 0.19                | placed          | HSAX | 51.25 |
| X | BMP15    | 369.62 | 0.46                | placed          | HSAX | 50.67 |
| X | MAGEH1   | 373.83 | 2.27                | frame           | HSAX | 55.50 |
| X | UMNe415  | 373.83 | 2.27                | frame_identical |      |       |
| X | TKY1130  | 373.83 | 2.27                | frame_identical |      |       |
| X | TKY040   | 373.83 | 2.27                | frame_identical |      |       |
| X | JARID1C  | 378.04 | 2.71                | placed          | HSAX | 53.24 |
| X | UMNe446  | 386.83 | 4.31                | frame           | HSAX | 52.9  |
| X | ASB12    | 481.33 | 1.06                | placed          | HSAX | 63.36 |
| X | KIAA1166 | 481.33 | 1.06                | placed          | HSAX | 64.05 |
| X | AR       | 521.87 | 1.64                | frame           | HSAX | 66.68 |
| X | AHT124   | 534.52 | 1.18                | placed          |      |       |
| X | PJA1     | 556.81 | 1.64                | frame           | HSAX | 68.30 |
| X | TAF1     | 570.44 | 0.27                | placed          | HSAX | 70.50 |

|   |          |        |                       |                 |      |        |
|---|----------|--------|-----------------------|-----------------|------|--------|
| X | GJB1     | 570.44 | 0.27                  | placed          | HSAX | 70.36  |
| X | PHKA1    | 576.31 | 1.93                  | frame           | HSAX | 71.72  |
| X | AHT028   | 576.31 | 1.93                  | frame_identical |      |        |
| X | XIST     | 588    | 2.14                  | placed          | HSAX | 72.96  |
| X | UMNe402  | 588    | 2.14                  | placed          | HSAX | 73.4   |
| X | ATP7A    | 608.37 | 0.53                  | frame           | HSAX | 77.05  |
| X | ITM2A    | 623.29 | 0.87                  | placed          | HSAX | 78.50  |
| X | P2RY10   | 623.29 | 0.87                  | placed          | HSAX | 78.09  |
| X | TKY991   | 623.29 | 0.87                  | placed          | HSAX | 78.6   |
| X | SH3BGRL  | 630.13 | 0.53                  | frame           | HSAX | 80.34  |
| X | UMNe060  | 630.13 | 0.53                  | frame_identical |      |        |
| X | HUWE1    | ---    | [COR091 -<br>UMNe446] | binned          | HSAX | 53.58  |
| X | FGD1     | ---    | [TKY1105 -<br>MAGEH1] | binned          | HSAX | 54.49  |
| X | ALAS2    | ---    | [TKY1105 -<br>MAGEH1] | binned          | HSAX | 55.05  |
| X | UMNe350  | ---    | [TKY1105 -<br>MAGEH1] | binned          | HSAX | 50.3   |
| X | UMNe596  | ---    | [TKY1105 -<br>MAGEH1] | binned          |      |        |
| X | TKY968   | ---    | [PJA1 -<br>ATP7A]     | binned          | HSAX | 71.3   |
| X | EFNB1    | ---    | [AR -<br>PHKA1]       | binned          | HSAX | 67.97  |
| X | EDA2R    | ---    | [UMNe446 -<br>PJA1]   | binned          | HSAX | 65.73  |
| X | HEPH     | ---    | [UMNe446 -<br>PJA1]   | binned          | HSAX | 65.30  |
| X | MSN      | ---    | [UMNe446 -<br>PJA1]   | binned          | HSAX | 64.80  |
| X | UMNe390  | ---    | [TMEM47 -<br>MAOB]    | binned          | HSAX | 42.3   |
| X | UMNe148  | ---    | [TMEM47 -<br>MAOB]    | binned          |      |        |
| X | AHT079   | ---    | [TMEM47 -<br>MAOB]    | binned          |      |        |
| X | UMNe107  | ---    | [PHKA1 -<br>SH3BGRL]  | binned          |      |        |
| X | SGCV31   | ---    | [PHKA1 -<br>SH3BGRL]  | binned          |      |        |
| X | POU3F4   | 0      | 0.87                  | frame           | HSAX | 82.65  |
| X | KLHL4    | 31.41  | 0.87                  | frame           | HSAX | 86.66  |
| X | UMNe266  | 31.41  | 0.87                  | frame_identical |      |        |
| X | NAP1L3   | 59.93  | 2.13                  | frame           | HSAX | 92.81  |
| X | TNMD     | 81.46  | 2.13                  | frame           | HSAX | 99.73  |
| X | SRPX2    | 103    | 2.26                  | frame           | HSAX | 99.79  |
| X | RPL36A   | 117.45 | 2.43                  | placed          | HSAX | 100.53 |
| X | GLA      | 117.45 | 2.43                  | placed          | HSAX | 100.54 |
| X | MCART6   | 124.73 | 2.28                  | frame           | HSAX | 103.23 |
| X | TMSL8    | 124.73 | 2.28                  | frame_identical | HSAX | 101.66 |
| X | LEX013   | 124.73 | 2.28                  | frame_identical | HSAX | 103.5  |
| X | SERPINA7 | 144.48 | 3.89                  | frame           | HSAX | 105.16 |



|   |         |        |                       |                 |      |        |
|---|---------|--------|-----------------------|-----------------|------|--------|
| X | CLDN2   | 150.23 | 2.36                  | placed          | HSAX | 106.05 |
| X | TKY038  | 167.34 | 1.7                   | frame           | HSAX | 107.1  |
| X | LEX024  | 178.09 | 0.36                  | placed          | HSAX | 107.2  |
| X | ATG4A   | 178.09 | 0.36                  | placed          | HSAX | 107.22 |
| X | MID2    | 178.09 | 0.36                  | placed          | HSAX | 106.96 |
| X | COL4A5  | 183.84 | 1.7                   | frame           | HSAX | 107.57 |
| X | UMNe376 | 183.84 | 1.7                   | frame_identical |      |        |
| X | IRS4    | 183.84 | 1.7                   | frame_identical | HSAX | 107.86 |
| X | ACSL4   | 190.01 | 2.34                  | placed          | HSAX | 108.77 |
| X | UMNe375 | 196.68 | 2.45                  | placed          | HSAX | 111.8  |
| X | PAK3    | 196.68 | 2.45                  | placed          | HSAX | 110.23 |
| X | AMOT    | 196.68 | 2.45                  | placed          | HSAX | 111.90 |
| X | DCX     | 196.68 | 2.45                  | placed          | HSAX | 110.42 |
| X | UM035   | 196.68 | 2.45                  | placed          |      |        |
| X | PLS3    | 211.13 | 2.73                  | frame           | HSAX | 114.70 |
| X | HTR2C   | 211.13 | 2.73                  | frame_identical | HSAX | 113.72 |
| X | AGTR2   | 211.13 | 2.73                  | frame_identical | HSAX | 115.22 |
| X | SLC6A14 | 218.41 | 2.07                  | placed          | HSAX | 115.48 |
| X | CUL4B   | 234.34 | 1.54                  | placed          | HSAX | 119.54 |
| X | LAMP2   | 234.34 | 1.54                  | placed          | HSAX | 119.45 |
| X | PGRMC1  | 242.36 | 2.73                  | frame           | HSAX | 118.25 |
| X | UMNe397 | 242.36 | 2.73                  | frame_identical |      |        |
| X | KLHL13  | 242.36 | 2.73                  | frame_identical | HSAX | 116.92 |
| X | LONRF3  | 242.36 | 2.73                  | frame_identical | HSAX | 117.99 |
| X | TKY519  | 242.36 | 2.73                  | frame_identical | HSAX | 118.1  |
| X | VHL81   | 242.36 | 2.73                  | frame_identical |      |        |
| X | TKY039  | ---    | [KLHL4 -<br>TNMD]     | binned          |      |        |
| X | DIAPH2  | ---    | [NAP1L3 -<br>SRPX2]   | binned          | HSAX | 95.83  |
| X | CHM     | ---    | [POU3F4 -<br>NAP1L3]  | binned          | HSAX | 85.01  |
| X | ZNF711  | ---    | [POU3F4 -<br>NAP1L3]  | binned          | HSAX | 84.39  |
| X | PABPC5  | ---    | [KLHL4 -<br>TNMD]     | binned          | HSAX | 90.58  |
| X | GPRASP1 | ---    | [SRPX2 -<br>SERPINA7] | binned          | HSAX | 101.80 |
| X | TKY1135 | ---    | [SRPX2 -<br>SERPINA7] | binned          | HSAX | 101.9  |
| X | WDR40B  | 0      | 2.23                  | frame           | HSAX | 125.51 |
| X | UMNe363 | 0      | 2.23                  | frame_identical |      |        |
| X | GRIA3   | 0      | 2.23                  | frame_identical | HSAX | 122.15 |
| X | BIRC4   | 0      | 2.23                  | frame_identical | HSAX | 122.82 |
| X | ODZ1    | 0      | 2.23                  | frame_identical | HSAX | 123.34 |
| X | UMNe594 | 0      | 2.23                  | frame_identical |      |        |
| X | ARHGEF6 | 18.6   | 2.17                  | placed          | HSAX | 135.58 |
| X | UMNe394 | 18.6   | 2.17                  | placed          |      |        |
| X | CD40LG  | 18.6   | 2.17                  | placed          | HSAX | 135.56 |
| X | RBMX    | 18.6   | 2.17                  | placed          | HSAX | 135.78 |
| X | ZIC3    | 18.6   | 2.17                  | placed          | HSAX | 136.48 |
| X | FGF13   | 18.6   | 2.17                  | placed          | HSAX | 137.54 |

|   |          |       |                         |                 |      |        |
|---|----------|-------|-------------------------|-----------------|------|--------|
| X | LEX003   | 18.6  | 2.17                    | placed          |      |        |
| X | HPRT1    | 26.14 | 2.23                    | frame           | HSAX | 133.42 |
| X | UMNe134  | 26.14 | 2.23                    | frame_identical |      |        |
| X | UMNe492  | 42.7  | 2.35                    | placed          | HSAX | 147.1  |
| X | FMR1     | 42.7  | 2.35                    | placed          | HSAX | 146.80 |
| X | UMNe387  | 42.7  | 2.35                    | placed          |      |        |
| X | TMEM185A | 51.06 | 2.26                    | placed          | HSAX | 148.49 |
| X | AFF2     | 51.06 | 2.26                    | placed          | HSAX | 147.39 |
| X | MTM1     | 58.61 | 4.19                    | frame           | HSAX | 149.49 |
| X | GABRE    | 58.61 | 4.19                    | frame_identical | HSAX | 150.87 |
| X | CXorf6   | 58.61 | 4.19                    | frame_identical | HSAX | 149.36 |
| X | TKY020   | 58.61 | 4.19                    | frame_identical |      |        |
| X | CETN2    | 65.5  | 2.36                    | placed          | HSAX | 151.75 |
| X | RPL10    | 78.1  | 2.71                    | frame           | HSAX | 153.28 |
| X | OPN1MW   | 78.1  | 2.71                    | frame_identical | HSAX | 153.10 |
| X | GDI1     | 78.1  | 2.71                    | frame_identical | HSAX | 153.32 |
| X | SYBL1    | 95.54 | 2.71                    | frame           | HSAX | 154.76 |
| X | CLIC2    | 95.54 | 2.71                    | frame_identical | HSAX | 154.16 |
| X | SPRY3    | 95.54 | 2.71                    | frame_identical | HSAX | 154.65 |
| X | BGN      | ---   | [MTM1 -<br>SYBL1]       | binned          | HSAX | 152.41 |
| X | G6PD     | ---   | [MTM1 -<br>SYBL1]       | binned          | HSAX | 153.41 |
| X | UMNe483  | ---   | [HPRT1 -<br>RPL10]      | binned          | HSAX | 149.6  |
| X | CD99L2   | ---   | [HPRT1 -<br>RPL10]      | binned          | HSAX | 149.69 |
| X | LDOC1    | ---   | [WDR40B -<br>MTM1]      | binned          | HSAX | 140.10 |
| X | IGSF1    | ---   | [WDR40B -<br>MTM1]      | binned          | HSAX | 130.24 |
| X | LEX022   | ---   | [WDR40B -<br>MTM1]      | binned          |      |        |
| X | ZDHHC9   | ---   | [p-terminal -<br>HPRT1] | binned          | HSAX | 128.77 |
| X | GPC3     | ---   | [WDR40B -<br>MTM1]      | binned          | HSAX | 132.50 |
