# Supplementary material
Source: publisher figshare collection journal article supplement (https://karger.figshare.com/articles/dataset/_/5120452)
Supplement: Supplementary file 5 [file 1]

**Supplementary Table 4.** Chromosome wise information on selected parameters of the integrated RH and comparative map

| Horse Chr.                | Size (Mb)<br>according<br>to RH I (1) | Size (Mb)<br>EquCab1 | Size (cR)       | No of<br>RH<br>groups | No of MLE<br>consensus<br>markers | Average<br>marker<br>density<br>(Mb)* | No of loci on the RH map |             |             |                      | No of FISH<br>mapped loci |                | No of<br>markers<br>shared<br>with<br>linkage<br>maps | No of comparative<br>loci |                              |
|---------------------------|---------------------------------------|----------------------|-----------------|-----------------------|-----------------------------------|---------------------------------------|--------------------------|-------------|-------------|----------------------|---------------------------|----------------|-------------------------------------------------------|---------------------------|------------------------------|
|                           |                                       |                      |                 |                       |                                   |                                       | Total                    | Type I      | Type<br>II  | BAC<br>ends,<br>STSs | Total                     | Anchor<br>loci |                                                       | With<br>human             | With all<br>other<br>species |
| ECA1                      | 204                                   | 180                  | 2506.3          | 13                    | 124                               | 0.78                                  | 260                      | 136         | 120         | 4                    | 100                       | 70             | 71                                                    | 193                       | 147                          |
| ECA2                      | 135                                   | 106                  | 1724.2          | 3                     | 92                                | 0.69                                  | 196                      | 107         | 80          | 9                    | 55                        | 43             | 45                                                    | 134                       | 96                           |
| ECA3                      | 132                                   | 110                  | 1795.8          | 4                     | 93                                | 0.92                                  | 143                      | 72          | 68          | 3                    | 46                        | 30             | 26                                                    | 110                       | 81                           |
| ECA4                      | 120                                   | 98                   | 2026.9          | 2                     | 111                               | 0.61                                  | 196                      | 106         | 87          | 3                    | 43                        | 35             | 46                                                    | 142                       | 98                           |
| ECA5                      | 111                                   | 73                   | 1588.1          | 4                     | 104                               | 0.63                                  | 177                      | 102         | 69          | 6                    | 48                        | 32             | 32                                                    | 133                       | 102                          |
| ECA6                      | 108                                   | 82                   | 1189.1          | 4                     | 70                                | 0.68                                  | 158                      | 92          | 65          | 1                    | 43                        | 33             | 32                                                    | 122                       | 92                           |
| ECA7                      | 105                                   | 86                   | 1430.3          | 5                     | 67                                | 0.88                                  | 120                      | 45          | 72          | 3                    | 70                        | 41             | 23                                                    | 86                        | 62                           |
| ECA8                      | 105                                   | 87                   | 1437.6          | 5                     | 73                                | 0.88                                  | 120                      | 58          | 61          | 1                    | 44                        | 26             | 34                                                    | 98                        | 74                           |
| ECA9                      | 99                                    | 76                   | 1354.9          | 2                     | 61                                | 0.9                                   | 110                      | 44          | 65          | 1                    | 22                        | 14             | 37                                                    | 76                        | 44                           |
| ECA10                     | 96                                    | 79                   | 1627.5          | 2                     | 81                                | 0.58                                  | 165                      | 84          | 64          | 17                   | 51                        | 42             | 43                                                    | 120                       | 80                           |
| ECA11                     | 72                                    | 58                   | 1827.9          | 4                     | 83                                | 0.56                                  | 129                      | 56          | 65          | 8                    | 46                        | 33             | 31                                                    | 93                        | 59                           |
| ECA12                     | 63                                    | 19                   | 679.1           | 2                     | 37                                | 1.15                                  | 55                       | 25          | 30          | 0                    | 12                        | 9              | 14                                                    | 38                        | 27                           |
| ECA13                     | 60                                    | 18                   | 805.1           | 3                     | 48                                | 0.63                                  | 95                       | 47          | 45          | 3                    | 23                        | 19             | 23                                                    | 54                        | 43                           |
| ECA14                     | 120                                   | 92                   | 1764.4          | 1                     | 77                                | 0.70                                  | 172                      | 96          | 70          | 6                    | 48                        | 38             | 39                                                    | 120                       | 93                           |
| ECA15                     | 111                                   | 88                   | 1393.3          | 2                     | 62                                | 0.82                                  | 136                      | 64          | 68          | 4                    | 40                        | 32             | 38                                                    | 96                        | 65                           |
| ECA16                     | 108                                   | 87                   | 1686.0          | 7                     | 71                                | 0.8                                   | 135                      | 67          | 61          | 7                    | 48                        | 33             | 38                                                    | 89                        | 66                           |
| ECA17                     | 102                                   | 79                   | 870.8           | 10                    | 52                                | 0.84                                  | 121                      | 65          | 52          | 4                    | 39                        | 36             | 24                                                    | 77                        | 54                           |
| ECA18                     | 102                                   | 64                   | 1245.6          | 3                     | 53                                | 0.96                                  | 106                      | 55          | 46          | 5                    | 21                        | 17             | 27                                                    | 74                        | 52                           |
| ECA19                     | 96                                    | 56                   | 1202.0          | 1                     | 43                                | 1.04                                  | 92                       | 34          | 55          | 3                    | 19                        | 12             | 27                                                    | 53                        | 31                           |
| ECA20                     | 87                                    | 58                   | 1321.0          | 2                     | 57                                | 0.65                                  | 134                      | 54          | 66          | 14                   | 38                        | 24             | 32                                                    | 84                        | 53                           |
| ECA21                     | 81                                    | 53                   | 875.6           | 3                     | 47                                | 0.70                                  | 116                      | 70          | 44          | 2                    | 37                        | 26             | 27                                                    | 78                        | 66                           |
| ECA22                     | 72                                    | 50                   | 911.4           | 1                     | 45                                | 0.54                                  | 133                      | 82          | 50          | 1                    | 52                        | 45             | 26                                                    | 93                        | 71                           |
| ECA23                     | 69                                    | 41                   | 711.8           | 3                     | 44                                | 0.91                                  | 76                       | 26          | 43          | 7                    | 21                        | 15             | 28                                                    | 58                        | 28                           |
| ECA24                     | 63                                    | 47                   | 830.7           | 2                     | 30                                | 1.07                                  | 59                       | 19          | 38          | 2                    | 19                        | 14             | 24                                                    | 39                        | 21                           |
| ECA25                     | 60                                    | 35                   | 662.0           | 1                     | 27                                | 1.33                                  | 45                       | 19          | 26          | 0                    | 16                        | 12             | 13                                                    | 35                        | 21                           |
| ECA26                     | 63                                    | 41                   | 741.9           | 1                     | 46                                | 0.81                                  | 78                       | 34          | 32          | 12                   | 16                        | 13             | 19                                                    | 60                        | 33                           |
| ECA27                     | 57                                    | 39                   | 564.0           | 3                     | 34                                | 0.81                                  | 70                       | 28          | 36          | 6                    | 12                        | 11             | 23                                                    | 39                        | 26                           |
| ECA28                     | 54                                    | 45                   | 456.2           | 1                     | 23                                | 0.95                                  | 57                       | 30          | 27          | 0                    | 16                        | 12             | 16                                                    | 37                        | 29                           |
| ECA29                     | 51                                    | 33                   | 626.3           | 1                     | 27                                | 0.96                                  | 53                       | 28          | 23          | 2                    | 9                         | 8              | 15                                                    | 31                        | 25                           |
| ECA30                     | 48                                    | 20                   | 594.1           | 1                     | 27                                | 1.09                                  | 44                       | 26          | 18          | 0                    | 9                         | 9              | 14                                                    | 34                        | 26                           |
| ECA31                     | 45                                    | 25                   | 381.7           | 1                     | 21                                | 1.05                                  | 43                       | 18          | 19          | 6                    | 11                        | 9              | 10                                                    | 27                        | 17                           |
| ECAX                      | 153                                   | 31                   | 1529.8          | 5                     | 87                                | 0.69                                  | 222                      | 148         | 72          | 2                    | 70                        | 64             | 23                                                    | 147                       | 122                          |
| Unassembled               |                                       | 406                  |                 |                       |                                   |                                       |                          |             |             |                      |                           |                |                                                       |                           |                              |
| <b>Total/<br/>average</b> | <b>2952</b>                           | <b>2462</b>          | <b>38,361.4</b> | <b>102</b>            | <b>1917</b>                       | <b>0.77*<br/>0.65**</b>               | <b>3816</b>              | <b>1937</b> | <b>1737</b> | <b>142</b>           | <b>1144</b>               | <b>857</b>     | <b>920</b>                                            | <b>2670</b>               | <b>1904</b>                  |

\*Average marker density calculated from chromosome and genome size estimates reported in RH I (1).

\*\* Average marker density calculated from the genome assembly EquCab1.
