# Supplementary material
Source: publisher figshare collection journal article supplement (https://karger.figshare.com/articles/dataset/_/5120452)
Supplement: Supplementary file 6 [file 1]

**Supplementary Table 1. Detailed chromosome-wise information regarding all markers present on the RH II map. Cytogenetic locations shown in bold represent work from this study.**

| Name           | Symbol          | Horse chr.       | Primers                                                                                                   | Product size (bp) | MgCl <sub>2</sub> (mM) | T <sub>a</sub> | Reference              | Accession No          |
|----------------|-----------------|------------------|-----------------------------------------------------------------------------------------------------------|-------------------|------------------------|----------------|------------------------|-----------------------|
| microsatellite | 1CA01           | <b>1q11-q12</b>  | F: ATTTCAAAAGCGGAAGAGCA<br>R: ATAGAGGAAGGCTGGCAACA                                                        | 110               | 2.0                    | 58             |                        | AF043198              |
| microsatellite | 1CA16           | 1                | F: TCACTGGGGGGTATATGCAT<br>R: GATCCTACTCCACCTGAAGTGG                                                      | 121               | 3.0                    | 58             | Chowdary et al. 2003   | AF043200              |
| microsatellite | 1CA20           | 1                | F: TGGACAAAATGCAAAAGTCA<br>R: TCCACTACACAGGAAAACGAA                                                       | 194               | 1.5                    | 50             | Chowdary et al. 2003   | AF043202              |
| microsatellite | 1CA21           | 1                | F: TGTCTTTCTCTGCCCTGGTT<br>R: TCTTGCATAAAAGGAATACGC                                                       | 243               | 3.0                    | 58             |                        | AF043203              |
| microsatellite | 1CA22           | 1                | F: TGGGCAAGAGGACAAATAGC<br>R: TGGCAGCCTTGGTTTGTACT                                                        | 208               | 3.0                    | 58             | Chowdary et al. 2003   | AF043204              |
| microsatellite | 1CA25           | 1q17.3           | F: TCCAATTTTCCCCAATGGTA<br>R: CTGCATTTTGACAATGGTGG                                                        | 206               | 3.0                    | 58             | Chowdary et al. 2003*  | AF043205              |
| microsatellite | 1CA28           | 1                | F: CCTACGCCCACACTCACATA<br>R: TGGACTTTTCTTACCCCCAAA                                                       | 213               | 1.5                    | 58             | Chowdary et al. 2003   | AF043208              |
| microsatellite | 1CA30           | 1p16             | F: TGGGGAGGGGTTGTTCTAG<br>R: GCTCTCCACTGCATGCATAA                                                         | 130               | 3.0                    | 58             | Chowdary et al. 2003*  | AF043209              |
| microsatellite | 1CA32           | 1                | F: AGTTACCAAATGTCTGCATTGC<br>R: TTCATCTGTAAAATGGGCAGG                                                     | 107               | 1.7                    | 58             | Chowdary et al. 2003   | AF043210              |
| microsatellite | 1CA36           | 1                | F: TGGACCAGGACAGAGGAAAC<br>R: GCCTTTAAAACAACCTCCCCC                                                       | 191               | 1.5                    | 58             |                        | AF043211              |
| microsatellite | 1CA40           | 1                | F: TTGAAAGCCGTGTTTTTGTG<br>R: ACCCCATGTTCTGACAAGGA                                                        | 226               | 1.5                    | 58             | Chowdary et al. 2003   | AF043213              |
| microsatellite | 1CA41/<br>1CA24 | 1q15-q16         | F1: CTGGTCAGGCCTATTACCCA<br>R1: AGATATTGGGGGCGGAAG<br>F2: AGATATTGGGGGCGGAAG<br>R2: TGGAGGTCAACTGGCTATCTC | 245/ 205          | 1.5                    | 58             | Chowdhary et al. 2003* | AF043214/<br>AF179211 |
| microsatellite | 1CA43           | 1q17.1-<br>q17.3 | F: ATGGCATGATTTGCTTCTCC<br>R: TGGAAACAACCTAAATGTCCA                                                       | 122               | 1.5                    | 58             | Chowdhary et al. 2003* | AF043215              |
| microsatellite | 1CA44           | 1p16             | F: GGCAGCACACCAAATCAAGT<br>R: TCCTGCAAAAACAACAGAGGA                                                       | 203               | 2.0                    | 58             | Chowdhary et al. 2003* | AF043216              |
| sequence       | 1STS01          | 1                | F: CAACAGAAGGCACTTCAAAGC                                                                                  | 115               | 1.5                    | 55             | Perrocheau et          | DX010625              |

|                 |            |                         |                             |         |     |    |                |           |
|-----------------|------------|-------------------------|-----------------------------|---------|-----|----|----------------|-----------|
| tagged site     | (FLJ11186) |                         | R: GGAGTTGCAAGCACGATTTTA    |         |     |    | al. 2006       |           |
| apobec-1        | ACF        | 1                       | F: GAATGGATTTAGGGCTCAGAC    | 229     | 1.5 | 60 |                | ECA576521 |
| complementati   |            |                         | R: GAGAGAGAACCAGGAGAGAAC    |         |     |    |                |           |
| on factor       |            |                         |                             |         |     |    |                |           |
| actin, alpha 2, | ACTA2      | <b>1p13<sup>a</sup></b> | F: CCACCCCATTTCTCCCATATC    | 325     | 1.5 | 58 |                |           |
| smooth          |            |                         | R: TCTTCCATTTCTCTCTCCCC     |         |     |    |                |           |
| muscle, aorta   |            |                         |                             |         |     |    |                |           |
| actin, alpha,   | ACTC1      | 1q24-q27                | F: GTGCCTTGCTCTCAGTCCACC    | 179     | 3.0 | 58 | Lear et al.    | G62166    |
| cardiac muscle  |            |                         | R: GGTTGCAAGTCCTGGTCTGGTT   |         |     |    | 2001*          |           |
| 1               |            |                         |                             |         |     |    |                |           |
| actinin, alpha  | ACTN2      | 1                       | F: GCCTGGTGTAACCTCCACCT     | 1328    | 1.5 | 58 |                |           |
| 2               |            |                         | R: GATGACTTCCAACAGCAGCA     |         |     |    |                |           |
| adducin 3       | ADD3       | 1                       | F: CTCAGTCACCGCAAATATCC     | ~1075   | 1.5 | 58 |                | CD528586  |
| (gamma)         |            |                         | R: TACTCACTCGTTTAGCAAGCTC   |         |     |    |                |           |
| adenosine       | ADK        | 1                       | F: GGTTCCTCCCGGAGTCAGTAT    | 165     | 1.5 | 58 |                |           |
| kinase          |            |                         | R: GTCTCATTTCCAAAAAGTATGTCA |         |     |    |                |           |
| angiotensinoge  | AGT        | 1q11-q12                | F: GAAGACTCAACTTGCCCTCCACT  | 212     | 3.0 | 58 | Fetal cDNA     |           |
| n               |            |                         | R: GCCACATTTACCAAGGACAAATG  |         |     |    | library, clone |           |
| microsatellite  | AHT021     | 1q14-q15                | F: TCCAAGTTGCTGAATGGATC     | 199-215 | 2.0 | 58 | #1109          |           |
|                 |            |                         | R: ACGGCCTGATTCTCTCTTTG     |         |     |    | Swinburne et   |           |
|                 |            |                         |                             |         |     |    | al. 1997;      |           |
| microsatellite  | AHT026     | 1p13                    | F: CTGATGTGGCTCAGTCTCCA     | 202-210 | 3.0 | 58 | Chowdhary      |           |
|                 |            |                         | R: TTCTTGGATTTTGGCAAAGG     |         |     |    | et al. 2003*   |           |
| microsatellite  | AHT040     | 1q15-q16                | F: GCAAGTTCAGCACCTCCCT      | 230     | 2.0 | 58 | Swinburne et   | AJ271511  |
|                 |            |                         | R: TTTATGACACCTGCTGAGAACG   |         |     |    | al. 2000*      |           |
|                 |            |                         |                             |         |     |    | Swinburne et   | AJ271525  |
|                 |            |                         |                             |         |     |    | al. 2000;      |           |
|                 |            |                         |                             |         |     |    | Chowdhary      |           |
|                 |            |                         |                             |         |     |    | et al. 2003*   |           |
| microsatellite  | AHT058     | 1                       | F: CAGTGATGAGCCGCAAATAG     | 163-198 | 2.0 | 58 | Swinburne et   | AJ507675  |
|                 |            |                         | R : TCTACCTATAATCCGCCTCCC   |         |     |    | al. 2000       |           |
| microsatellite  | AHT069     | 1                       | F: ACCGCTGGACCTTCCTTC       | 192-194 | 1.5 | 58 | Swinburne et   |           |
|                 |            |                         | R: ATCGTAGCATCCCTCACATACA   |         |     |    | al. 2003       |           |
| microsatellite  | AHT085     | 1                       | F: GTGCCAATCACTATCCAGTTTG   | 153-160 | 1.5 | 58 | Swinburne et   |           |
|                 |            |                         | R: CGACCAGAATATCAAACAAGTG   |         |     |    | al. 2003       |           |

|                                                      |         |                          |                                                          |       |     |          |                            |          |
|------------------------------------------------------|---------|--------------------------|----------------------------------------------------------|-------|-----|----------|----------------------------|----------|
| microsatellite                                       | AHT113  | 1                        | F: CATGGATGTCAGCTCAGGG<br>R: GGTCAAACAAAATAATGGTTCC      | 110   | 1.5 | 59       |                            |          |
| microsatellite                                       | AHT121  | 1                        | F: TTGAAGGCCTCTCCAGAGAG<br>R: AGGTCAGAAAGTCCTTGGAGG      | 182   | 1.5 | 61       |                            |          |
| aldehyde<br>dehydrogenase<br>1 family,<br>member A3  | ALDH1A3 | 1q17.2                   | F: CCATCAGGGAGTGTTCTTCAA<br>R: CCTGACGTCAAAGGGGTCT       | 145   | 1.5 | 55       | Perrocheau et<br>al. 2006* | DX010430 |
| arachidonate<br>5-lipoxygenase                       | ALOX5   | <b>1p13-q14</b>          | F: CCATGCAGGACCTGACCTAT<br>R: GTCGTCCCGGTAGAAAGTAGT      | 64    | 1.5 | 58       |                            | AB218723 |
| alpha-kinase 3                                       | ALPK3   | 1                        | F: CCTCCTCCACCAGTGTAAC<br>R: TGGACTCTTGGAACCTTTGG        | 107   | 1.5 | 60       |                            |          |
| ankyrin 3                                            | ANK3    | <b>1p13-<br/>p12.3</b>   | F: CCTTGGTACACATAGAGAGCAT<br>R: GGTTAATGATTCCCAGAATGGC   | 113   | 1.5 | 58       |                            |          |
| ankyrin repeat<br>domain 1                           | ANKRD1  | <b>1p14-p13</b>          | F: ACTGATGCTGGAAAGCTCAC<br>R: GCACTCGCCTATTATGCTAC       | 314   | 1.5 | 58       |                            |          |
| ankyrin repeat<br>domain 2                           | ANKRD2  | 1                        | F: GAAGGCAGGAAGGTAGTGAG<br>R: GATGAATGGATGGATGGATGG      | 256   | 1.5 | 56       |                            |          |
| annexin A2                                           | ANXA2   | 1q21.3-<br>q22           | F: GTGGGGATGACTGAAGCCTGT<br>R: CACTGCCAACTCCTTGGAATGT    | 234   | 3.0 | 58       | Chowdhary<br>et al. 2003*  | G62155   |
| annexin A7                                           | ANXA7   | <b>1p12.3-<br/>p12.1</b> | F: GCCGTCCTCACAGTCTTAT<br>R: GAGCTTGACCTCCAGGATA         | ~856  | 3.0 | 58       | Chowdhary<br>et al. 2003   |          |
| annexin A11                                          | ANXA11  | 1                        | F: AACGAGTATCAGCGAATGAC<br>R: TGAGCCTTTCAGCAAAGAAG       | ~1200 | 1.5 | 60       |                            | CD528344 |
| AT rich<br>interactive<br>domain 4B                  | ARID4B  | 1                        | F: TGGAAAGTGCTATGTGGAGG<br>R: GGAATGGGAACTAAACGAGG       | 151   | 1.5 | 56       |                            |          |
| arrestin<br>domain<br>containing 4<br>microsatellite | ARRDC4  | 1                        | F: TTCCTCTCGTCTGATTGTTCC<br>R: CAATCCAGGATGGATGGAGT      | 189   | 1.5 | 60       |                            |          |
| microsatellite                                       | ASB08   | 1q16-q17                 | F: GACAACGTGGCAGCTCACTGCC<br>R: GCAAGTAAGCCATATGTGCATGCG | 143   | 3.0 | TD<br>64 | Breen et al.<br>1997*      | X95323   |
| microsatellite                                       | ASB12ms | 1q12-q13                 | F: TCAGCAATAGAAGCCAGCTCC<br>R: TCCTATGGAGGTGACCTTCCC     | 171   | 3.0 | 65       | Breen et al.<br>1997*      | X95327   |

|                                                      |                      |                         |                                                             |         |     |          |                                             |          |
|------------------------------------------------------|----------------------|-------------------------|-------------------------------------------------------------|---------|-----|----------|---------------------------------------------|----------|
| microsatellite                                       | ASB41                | 1p14                    | F: AAAGTTCACTTAGTCCTTGG<br>R: CCACCTGTTTGCACCTTGC           | 129-159 | 3.0 | TD<br>64 | Irvin et al.<br>1998 ; Lear<br>et al. 1999* | AF004771 |
| beta-2-<br>microglobulin                             | B2M                  | <b>1q23<sup>a</sup></b> | F: CACCCCAATGTTTCTCACT<br>R: GGTCCCTCCTGCCTACTAGC           | 194     | 2.0 | 58       | Shubitowski<br>et al. 2001                  |          |
| BCL2-<br>associated<br>athanogene 3                  | BAG3                 | 1p18-p16                | F: CGTCAGGAAGGTTTCAGACC<br>R: GGGCTCTTCTCCATGTCC            | 187     | 1.5 | 61       | Perrocheau et<br>al. 2006*                  | CX595296 |
| BTB domain<br>containing 1<br>caspase 7              | BTBD1                | 1                       | F: CAAGAAGGTAGCGACGTGTG<br>R: AGACCAACTTGTCTCTGGCATA        | 239     | 1.5 | 60       |                                             | CX599403 |
|                                                      | CASP7                | 1                       | F: GAGATCCATCACGACCAACC<br>R: CTCAGCATCTTTGTCTGTTCC         | ~650    | 1.5 | 58       |                                             | CD466307 |
| cadherin-like<br>23                                  | CDH23                | 1                       | F: CATCATGCTGATTGCCAGAC<br>R: GCTGTGTGACAGAAGGCTCA          | 157     | 1.5 | 58       |                                             | AB218725 |
| centrosomal<br>protein 27kDa                         | CEP27                | 1                       | F: GCAAAGATGGATATTTTGGTGA<br>R: AAAGGTAAAGGAGGTATCATAACATCA | 158     | 1.5 | 58       |                                             | DN506056 |
| cofilin 2<br>(muscle)                                | CFL2                 | 1                       | F: CCATTTCTCCAGCTCAGTCA<br>R: GCATTCCGTGGGTTCTACATA         | 185     | 1.5 | 58       |                                             |          |
| cingulin-like 1                                      | CGNL1                | 1                       | F: CAGTCGGAGCAACAGTTCAG<br>R: TTGAGCAATTCCTTCGCTTT          | 180     | 1.5 | 58       |                                             | CX594868 |
| BAC end<br>sequence                                  | CH241-<br>102E24_SP6 | 1                       | F: CTTGGAACCCTAAGTTGCTG<br>R: GCTGGAACCTTGGGATATTAAC        | 545     | 1.5 | 60       |                                             | AJ584137 |
| BAC end<br>sequence                                  | CH241-<br>102F21_SP6 | <b>1p13</b>             | F: ACCGATTTGCTTAGCCTTCC<br>R: CAAACCATCCCATTGATCTCC         | 541     | 1.5 | 58       |                                             | AJ584173 |
| chromodomain<br>helicase DNA<br>binding<br>protein 2 | CHD2                 | 1                       | F: GCTCAGACGAATGACAGTGAC<br>R: CGGATCTCCGCATCAGTAAA         | 173     | 1.5 | 60       |                                             | CX602471 |
| carbohydrate<br>synthase 1                           | CHSY1                | 1                       | F: TGTGTATTGGGCGTGTGTTT<br>R: TTTGTCCCCAACACAAGTGA          | 171     | 1.5 | 60       |                                             | CX594281 |
| calcium and<br>integrin<br>binding 1                 | CIB1                 | 1                       | F: CAAGTCCCCTATGCCTTCC<br>R: CTCAGGTCATCTCTGTTCAAGG         | 213     | 1.5 | 63       |                                             |          |
| C-type lectin<br>domain family<br>14, member A       | CLEC14A              | 1                       | F: GGCTCCAAAGACCTTCTCTTC<br>R: CAAGCCCTCAAACCTGGTACTT       | 279     | 1.5 | 54       |                                             |          |

|                                                       |               |                  |                                                       |         |     |       |                                               |          |
|-------------------------------------------------------|---------------|------------------|-------------------------------------------------------|---------|-----|-------|-----------------------------------------------|----------|
| CDC-like kinase 3                                     | CLK3          | 1                | F: CAGCCCCATTTTCTCCAAC<br>R: GTACCAGGGGTACAAACAGTAAG  | 199     | 1.5 | 58    |                                               |          |
| chymase 1                                             | CMA1<br>(CYH) | 1                | F: GAATTGCTCCTCTGCAGGTC<br>R: CCTGTAGGTCCCACCTCTGA    | 200     | 1.5 | TD 60 | Chowdhary et al. 2003                         | AF130752 |
| collagen, type XIII, alpha 1                          | COL13A1       | 1                | F: CTCGAGGCAAACCAGGAGAC<br>R: CCCTTTCTCCCCCTTCTCT     | 61      | 1.5 | 58    |                                               | AB218726 |
| microsatellite                                        | COR006        | 1q25             | F: GTTCTGCACATCCTGCTCTT<br>R: AGTGCCCTGAAACTGTATGG    | 187-199 | 3.0 | 58    | Hopman et al. 1999;<br>Chowdhary et al. 2003* | AF083449 |
| microsatellite                                        | COR046        | 1q17.1           | F: TGTTTGCAAAGATATTGGGG<br>R : ACCTGGTCAGGCCTATTACC   | 245-259 | 1.5 | 55    | Ruth et al. 1999 ;<br>Chowdhary et al. 2003*  | AF108363 |
| microsatellite                                        | COR053        | 1                | F: AATTGACTGTGGAAGCCTTG<br>R: GGCTGAGGAGTAAGCTGAAAG   | 173-197 | 3.0 | 55    | Ruth et al. 1999                              | AF108370 |
| microsatellite                                        | COR059        | 1p12.3-<br>p12.2 | F: ATGAATGGCAAATTGAAGGA<br>R: TTCTGTTTAGGGGCTCTTAGG   | 265-277 | 3.0 | 58    | Ruth et al. 1999;<br>Chowdhary et al. 2003*   | AF108376 |
| microsatellite                                        | COR063        | 1                | F: CAGAGCAATCCTTCTGTCACG<br>R: GTTGTTTATCATTTGAAAGCCG | 130     | 1.5 | 58    | Tallmadge et al. 1999a                        | AF142600 |
| microsatellite                                        | COR079        | 1                | F: TGCTGCCAGATCTTCTGAAT<br>R: TGGAGAGCGTGAAATTAACC    | 202-212 | 1.5 | 58    | Tallmadge et al. 1999a                        | AF142616 |
| microsatellite                                        | COR100        | 1                | F: CCCAGAGGTTTCAGAGGG<br>R: ATTCTAGGGCATATTATGACAA    | 188-220 | 3.0 | 58    | Tallmadge et al. 1999b                        | AF154953 |
| chemokine (C-X-C motif) ligand 12                     | CXCL12        | 1                | F: GGCCACCTTCACATTATCTG<br>R: CGATTTGACCTTCCTTTCTGAC  | 370     | 1.5 | 60    |                                               | BM781275 |
| cytochrome P450, family 1, subfamily A, polypeptide 2 | CYP1A2        | 1                | F: ATCCAGGAGGAGCTGGGTTAG<br>R: GAGTGTCGGAAGGTCTCCAG   | 202     | 2.0 | 65    | Chowdhary et al. 2003                         | AF134063 |
| cytochrome P450, family                               | CYP19A1       | <b>1q22</b>      | F: TGAAGGTGATGCTGGTTTCA<br>R: TGTTGAGGCACTTTTCTGA     | 169     | 3   | 58    |                                               | AF031520 |

|                                                                             |                 |                        |                                                       |       |     |    |                                                    |          |
|-----------------------------------------------------------------------------|-----------------|------------------------|-------------------------------------------------------|-------|-----|----|----------------------------------------------------|----------|
| 19, subfamily<br>A, polypeptide<br>1                                        |                 |                        |                                                       |       |     |    |                                                    |          |
| discs, large<br>homolog 5<br>(Drosophila)                                   | DLG5            | 1                      | F: TTAAACAGCCAAGGCAGCAG<br>R: TTCAAAGCACAGAAAGGCAAAG  | 404   | 1.5 | 58 |                                                    |          |
| dynammin<br>binding<br>protein                                              | DNMBP           | 1                      | F: CCAGAAACTGACTTGGTTGAA<br>R: CAGTGCTTTAGGGGCTTTTAG  | 175   | 1.5 | 62 |                                                    |          |
| early growth<br>response 2<br>(Drosophila)                                  | EGR2            | <b>1p13-<br/>p12.3</b> | F: ACTGTTAAGCAAGTTCTGAACC<br>R: ACATCACACAAGGCACCAAG  | 155   | 1.5 | 60 |                                                    | CD471350 |
| eukaryotic<br>translation<br>initiation<br>factor 3,<br>subunit 10<br>theta | EIF3S10         | 1                      | F: AGCACTTGAAGTCATTAAGCC<br>R: TACGCTCCTTCTCTCTCTCC   | ~1200 | 1.5 | 58 |                                                    |          |
| exocyst<br>complex<br>component 8                                           | EXOC8           | <b>1q13</b>            | F: TGGGAAGTTGATTAAAGACCAC<br>R: TATGATTCCAAGCTCAAGCG  | 252   | 1.5 | 60 |                                                    | CD465126 |
| exosome<br>component 1                                                      | EXOSC1          | 1                      | F: GCCCTAAGACCCACACTAAAG<br>R: GAATGAAATCCACTGAAAGGTT | 250   | 1.5 | 62 |                                                    |          |
| fumarylacetoac<br>etate<br>hydrolase                                        | FAH             | 1                      | F: CACTTGCCAGTGGCTACCAT<br>R: TGCAGGCACCATATACAGGA    | 234   | 1.5 | 60 |                                                    | CX599712 |
| feline sarcoma<br>oncogene                                                  | FES             | 1q14-q15               | F: CACCCAAGGTCACACATCAG<br>R: AATGAGACGCACAATGTTGG    | 201   | 1.5 | 58 | Lear et al.<br>2000* ;<br>Chowdhary<br>et al. 2003 | AF130763 |
| fibroblast<br>growth factor<br>receptor 2                                   | FGFR2           | 1                      | F: ATGCTTAGAGCTGGAAGGAC<br>R: GAGGAGAAATAAGCCCCAAC    | 377   | 1.5 | 58 |                                                    |          |
| FK506 binding<br>protein 3                                                  | FKBP3           | 1                      | F: ATTCCACCAAATGCAAAACTC<br>R: GGGGATCAAGTAAACAAGTCCT | 198   | 1.5 | 58 |                                                    | CX604401 |
| furin                                                                       | FURIN<br>(PACE) | 1q16                   | F: ATGGAGCTAGGCCCTGGTT<br>R: CCATGCTTGCGTGCCACA       | 150   | 2.0 | 58 | Godard et al.<br>2000*                             |          |

|                                                                  |        |                 |                                                                |         |     |          |                                                     |          |
|------------------------------------------------------------------|--------|-----------------|----------------------------------------------------------------|---------|-----|----------|-----------------------------------------------------|----------|
| GTP<br>cyclohydrolase<br>I feedback<br>regulator                 | GCHFR  | <b>1q23-q24</b> | F: GAGTACTACGTCAATGACCCTCCT<br>R: GTGCCCTGTCTGCTCCTC           | 150     | 1.5 | 58       |                                                     | CX597457 |
| glutamate<br>dehydrogenase<br>1                                  | GLUD1  | <b>1q13-q14</b> | F: GCAAAAATAAAAAGCCCACTG<br>R: GGAGGTTACTGCATTCTTTGG           | 92      | 1.5 | 58       |                                                     | AB218733 |
| glyceronephos<br>phate O-<br>acyltransferase                     | GNPAT  | 1               | F: CTTACAGAGGGAAGAAAAAAT<br>R: TAGAGAAAACAAGGCACA              | 198     | 1.5 | 56       |                                                     |          |
| glutamic-<br>oxaloacetic<br>transaminase 1<br>general            | GOT1   | <b>1p14</b>     | F: GAAGGTGGAGCAGAGGATTG<br>R: AAGAGCTGGGCTGTCATCTC             | 84      | 1.5 | 58       |                                                     | AB218734 |
| transcription<br>factor IIA, 2<br>hect domain<br>and RLD 2       | GTF2A2 | 1               | F: CTGGCTCCAATACTACAGAATGA<br>R: AAAGGTAATGTAAGAGGCTACAGAGG    | 201     | 1.5 | 58       |                                                     | CX604586 |
| equine EST                                                       | HERC2  | 1               | F: GCAATATTTTGTGGCCGTTT<br>R: GCTCACTGCCATCAATCAGA             | 151     | 1.5 | 58       |                                                     |          |
|                                                                  | HEST16 | 1q21-q23        | F: GGCCTTCATAGGACTTTTCATAAAC<br>R: GAGGCTGAAGGACAATTCAATTCAAGC | 50      | 2.0 | 58       | Godard et al.<br>2000*                              |          |
| hypoxia-<br>inducible<br>factor 1, alpha<br>subunit<br>inhibitor | HIF1AN | 1               | F: CAAGGGCCGATACAACCTAGC<br>R: CTCCAGGGTCATGGCAAG              | 154     | 1.5 | 62       |                                                     |          |
| hexokinase 1                                                     | HK1    | 1               | F: CCACTCTGCATGATTTGATTC<br>R: TGGCATTGATACATCCCAAAAG          | 303     | 1.5 | 60       |                                                     | BM780491 |
| microsatellite                                                   | HMS07  | 1q25            | F: CAGGAACTCATGTTGATACCATC<br>R: TGTGTGTAACATACCTTGACTGT       | 172-182 | 3.0 | 58       | Guérin et al.<br>1994;<br>Chowdhary<br>et al. 2003* | X74636   |
| microsatellite                                                   | HMS15  | 1q21-q23        | F: ATATCTCTTGCTGTCCTACTTTCC<br>R: AATGTGACACGTAAGATAGGCCTC     | 213-237 | 3.0 | TD<br>64 | Godard et al.<br>1998*                              | U35401   |
| heterogeneous<br>nuclear<br>ribonucleoprot<br>ein F              | HNRPF  | <b>1q11</b>     | F: TTGCCACTCACGAAGAAGC<br>R: ATCCACCCATGCTGTTCTCG              | 234     | 1.5 | 58       |                                                     |          |

|                                                                                                             |                              |   |                                                            |         |     |    |                        |          |
|-------------------------------------------------------------------------------------------------------------|------------------------------|---|------------------------------------------------------------|---------|-----|----|------------------------|----------|
| microsatellite                                                                                              | HP27                         | 1 | F: TGTTCATTCAACCATTCTGCCC<br>R: AAACCCTCCACTACCCCATTC      | 136-152 | 1.5 | 58 | Swinburne et al. 2005  |          |
| microsatellite                                                                                              | HTG12                        | 1 | F: CACTAGAGTCAGGGGGGGTGGGCT<br>R: TTGGAGTACTCTTTCTCCCTTCCC | 111     | 1.5 | 65 | Marklund et al. 1994   | AF169296 |
| HtrA serine<br>peptidase 1                                                                                  | HTRA1                        | 1 | F: GATAGACCCGCAGGCAGAAGC<br>R: AGGCAACTCTGGCCATTTGGA       | 295     | 2.0 | 58 |                        | G62160   |
| insulin-<br>degrading<br>enzyme                                                                             | IDE                          | 1 | F: GTGACATTTCCCATACCTGA<br>R: TGATAACAGACTCCCAGGAC         | 102     | 1.5 | 58 |                        |          |
| insulin-like<br>growth factor<br>1 receptor                                                                 | IGF1R                        | 1 | F: TCCAGACAGGAGTACAGGAAGT<br>R: CGACCCATTTCCAGAGAGAG       | 105     | 2.0 | 65 | Caetano et al. 1999    | AF097585 |
| iron-<br>responsive<br>element<br>binding<br>protein 2                                                      | IREB2                        | 1 | F: TCGTCTTTGTGATTGTGTTCG<br>R: AGGCCAAATATCATGCAGGT        | 464     | 1.5 | 60 |                        |          |
| interferon<br>regulatory<br>factor 2<br>binding<br>protein 2                                                | IRF2BP2                      | 1 | F: AGAGAGACTCGTGACTTTCC<br>R: CTAGAAGCATTTCTGATTTGCC       | 336     | 1.5 | 62 |                        | CD535568 |
| potassium<br>large<br>conductance<br>calcium-<br>activated<br>channel,<br>subfamily M,<br>alpha member<br>1 | KCNMA1                       | 1 | F: TCCAAAACAACCAGGCTCTC<br>R: CCGAGGATGAAGAAGACCAT         | 93      | 1.5 | 58 |                        | AB218740 |
| kelch domain<br>containing 2                                                                                | KLHDC2                       | 1 | F: GAGAATGCCTCTCATCACTTG<br>R: TTCACATGCACATTAACCA         | 120     | 1.5 | 58 |                        | CX596933 |
| La<br>ribonucleoprotein<br>domain<br>family,                                                                | LARP6<br>( <i>FLJ11196</i> ) | 1 | F: AGTACATGGGGGACGAGTCTT<br>R: GATTTTCTGGAGACCCCTTTG       | 205     | 1.5 | 55 | Perrocheau et al. 2006 | DX010626 |



|                                                                      |        |                        |                                                        |         |     |    |                           |                       |
|----------------------------------------------------------------------|--------|------------------------|--------------------------------------------------------|---------|-----|----|---------------------------|-----------------------|
| member 6                                                             |        |                        |                                                        |         |     |    |                           |                       |
| microsatellite                                                       | LEX020 | <b>1p15</b>            | F: GGAATAGGTGGGGGTCTGTT<br>R: AGGGTACTAGCCAAGTGACTGC   | 192-215 | 2.0 | 58 | Coogle et al.<br>1996     | AF075622              |
| microsatellite                                                       | LEX030 | 1                      | F: GGAGGGTGCAAGGTGCTA<br>R: GGCAGGTCAGAAGGGACA         | 173-179 | 1.5 | 55 | Coogle et al.<br>1996     | AF075632              |
| microsatellite                                                       | LEX039 | 1                      | F: CCTCTGTCCCCACTACTCTC<br>R: TTGATCTCCACTCCCAATG      | 181-187 | 3.0 | 58 | Coogle et al.<br>1996     | AF075641              |
| microsatellite                                                       | LEX058 | 1q17.1                 | F: GCAATCCGCTAGATAGAGTG<br>R: ACCTTTACTTTACGGGTCACA    | 224-236 | 2.0 | 55 | Coogle &<br>Bailey 1997*  | AF075665,<br>AF075664 |
| microsatellite                                                       | LEX077 | 1                      | F: GGTCTCTATGGATCTCTTTGTG<br>R: GACTGATAAAACATGGAAGGTT | 181-199 | 5.0 | 58 | Bailey et al<br>2000      | AF213363              |
| lipase, hepatic                                                      | LIPC   | <b>1q21.3-<br/>q22</b> | F: CCTCTTCATCGACTCCTTGCT<br>R: GAGGCTCTTGCTCTTCTTGC    | 169     | 1.5 | 58 |                           |                       |
| lysyl oxidase-<br>like 1                                             | LOXL1  | 1                      | F: TCAGCTGAAGAGGGAAGGAGCC<br>R: CCAGTGACCTGCCCCTTTCTGT | 282     | 1.5 | 58 |                           |                       |
| LysM, putative<br>peptidoglycan-<br>binding,<br>domain<br>containing | LYSMD2 | 1                      | F: GGAGCAGATTAAGGGCAAA<br>R: GGACTGGGAGGAGAGAGGTC      | 204     | 1.5 | 58 |                           | CX597257              |
| lysosomal<br>trafficking<br>regulator                                | LYST   | 1                      | F: ATCCAGTTCAGAGACGAGCG<br>R: TGACCTGTTCTCGGGTTTCC     | ~180    | 1.5 | 58 |                           | NM_000081             |
| mitogen-<br>activated<br>protein kinase                              | MAP2K1 | 1                      | F: AAGTGGATTTTGCAGGTTGG<br>R: GGTGAAATGCACGTGTGAAC     | 181     | 1.5 | 58 |                           | CX601814              |
| kinase 1                                                             |        |                        |                                                        |         |     |    |                           |                       |
| mitogen-<br>activated<br>protein kinase                              | MAPK6  | 1                      | F: TCCTAAGGCTGTCCACGTACT<br>R: TTCCATGCACACAAGTCTAACA  | 201     | 1.5 | 55 | Perrocheau et<br>al. 2006 | DX010525              |
| 6                                                                    |        |                        |                                                        |         |     |    |                           |                       |
| MAP3K12<br>binding<br>inhibitory<br>protein 1                        | MBIP   | <b>1q26</b>            | F: ATAGTTGTGCAAGAACCGATG<br>R: CTTCTACGGCCTGATTACCAC   | ~407    | 1.5 | 58 |                           | CX597715              |

|                                                                      |        |                      |                                                           |      |      |    |                                                       |          |
|----------------------------------------------------------------------|--------|----------------------|-----------------------------------------------------------|------|------|----|-------------------------------------------------------|----------|
| methylnalonyl<br>CoA<br>epimerase                                    | MCEE   | 1                    | F: CCTCAATCATGTAGCAATAGCA<br>R: TGAAGCAGTTCCATCTTGGTA     | 150  | 1.5  | 58 |                                                       |          |
| microfibrillar-<br>associated<br>protein 1                           | MFAP1  | <b>1q23-q24</b>      | F: CTGCCGTACATGTGACACTGG<br>R: CCTTTATTCTCGACACACATACA    | 368  | 30.0 | 58 |                                                       | G62192   |
| multiple<br>inositol<br>polyphosphate<br>histidine<br>phosphatase, 1 | MINPP1 | <b>1p13<br/>prox</b> | F: GAAGAATTCCGAGTGCAGATG<br>R: TCACATTCTTCACTGGTATGACAA   | 140  | 1.5  | 55 | Perrocheau et<br>al. 2006                             | DX010642 |
| multimerin 2                                                         | MMRN2  | 1                    | F: CCCAAGGATCGGTAATAAAGA<br>R: AGGCCACCTATAACCACTG        | 218  | 1.5  | 60 |                                                       |          |
| mitochondrial<br>ribosomal<br>protein S11                            | MRPS11 | 1                    | F: CTGCCATTAAGGGACTGACC<br>R: GCTTCTTTCCCTCACAGC          | 119  | 1.5  | 60 |                                                       | DN505125 |
| myosin, heavy<br>chain 6                                             | MYH6   | 1q25-q26             | F: AGTTGCAGAACCCGAGTGAC<br>R: ACAAGGGGAAACCATGTGAG        | 200  | 2.0  | 58 | Caetano et al.<br>1999;<br>Milenkovic<br>et al. 2002* | AF130771 |
| myosin VA                                                            | MYO5A  | 1q23                 | F: TTGTCAAAGTGTGAATTTG<br>R: GGTGACAGGAAAGATGTG           | ~500 | 3.0  | 58 | Mariat et al.<br>2001*                                |          |
| necdin<br>homolog<br>(mouse)                                         | NDN    | 1                    | F: CGTGTAACCTTTGTTTCAGTACAGTGC<br>R: TACACACCATCCGTCCCATA | 235  | 1.5  | 58 |                                                       | CX605730 |
| NADH<br>dehydrogenase<br>1 beta<br>subcomplex, 8                     | NDUFB8 | 1                    | F: TGTATATCAGGAACCGTGTGG<br>R: CTGGTAGGTGGGGTAAGTGTC      | 131  | 1.5  | 58 |                                                       | DN507469 |
| nei<br>endonuclease<br>VIII-like 1 (E.<br>coli)                      | NEIL1  | 1                    | F: GAAGAAATCCAAGGGACTGC<br>R: CTGCTGGGCTGTAGTTTGCT        | 287  | 1.5  | 58 |                                                       |          |
| neogenin<br>homolog 1<br>(chicken)                                   | NEO1   | 1                    | F: GAAGGACCTAAACGCCATCA<br>R: CAAAGGGAAGCTGCTTTGAC        | 248  | 1.5  | 58 |                                                       | CX603891 |
| NHL repeat                                                           | NHLRC2 | 1                    | F: AGGGAATTTTGTTCAGTCAGC                                  | 150  | 1.5  | 60 |                                                       |          |

|                                              |               |                        |                                                                                   |         |     |    |                           |          |
|----------------------------------------------|---------------|------------------------|-----------------------------------------------------------------------------------|---------|-----|----|---------------------------|----------|
| containing 2<br>nidogen 2                    | NID2          | <b>1q28</b>            | R: AAGATACAGTGACGGGAAGGA<br>F: TGTTTGCTATGGATTTTGTCTG<br>R: AGAGCCTTCTCTGACCTTGTC | 103     | 1.5 | 58 |                           | CX603999 |
| nucleoside<br>phosphorylase                  | NP            | 1q26-q27               | F: CATTCCCAGTGAGGGTTTTC<br>R: CGGATCAGCATGATATCACC                                | 110     | 1.5 | 58 | Godard et al.<br>1998*    |          |
| nuclear<br>receptor<br>binding factor<br>2   | NRBF2         | <b>1p13-<br/>p12.3</b> | F: CAGAAGAGTGAGCCAACAGAG<br>R: AAGGGAGGAAGATTGGGTATC                              | 353     | 1.5 | 60 |                           |          |
| neuregulin 4                                 | NRG4          | 1                      | F: TTCTCCCAAGCTTCAGCATC<br>R: GGAAGTAGATGGCTCCAATGA                               | 102     | 1.5 | 60 |                           | CX596376 |
| microsatellite                               | NVHEQ031      | 1                      | F: AACTCAAAAGCACAAAGCCCACAC<br>R: CAACACAGTGATGACCCAGGTAGG                        | 128-130 | 2.0 | 58 | Roed et al.<br>1998       | AF056394 |
| PDZ and LIM<br>domain 1                      | PDLIM1        | 1                      | F: CCATTTCTTTGTGGAAGATCA<br>R: ATTGTAAAAGCAGGCATCACA                              | 283     | 1.5 | 60 |                           |          |
| phosphatidylin<br>ositol 4-kinase<br>type II | PI4KII        | <b>1p14 .1</b>         | F: GCTCTCCCAAAGACCACA<br>R: ACATTGCCCTCATCCAGA                                    | 171     | 2.0 | 58 |                           |          |
| pyruvate<br>kinase, muscle                   | PKM2<br>(PK3) | 1q21.1-<br>q21.2       | F: GCAACCTGGGTTCTGTGTTT<br>R: CCTGCCAAATTGCTCAAAAT                                | 207     | 2.0 | 58 | Chowdhary<br>et al. 2003* | AY008802 |
| plasminogen<br>activator,<br>urokinase       | PLAU          | 1                      | F: TCTCTTCCTCTTTCCCAGCA<br>R: ACCGACCCAGGTAGACAATG                                | 209     | 2.0 | 58 |                           | AY008803 |
| pancreatic<br>lipase-related<br>protein 2    | PNLIPRP2      | 1                      | F: AAGCGAATGGGTACCTCAAG<br>R: AGTTGGGGCTTGGAGAGATT                                | ~1000   | 1.5 | 58 |                           | AF359386 |
| pinin                                        | PNN           | 1                      | F: GCACACGGAGAGACCTTATC<br>R: GCAACAGTGGATTCTTGTTTG                               | ~274    | 1.5 | 65 |                           |          |
| polymerase<br>(DNA<br>directed),<br>gamma    | POLG          | 1                      | F: TCAGAACCAAGATGCCAACA<br>R: TCTAGGGCACTGCATCACAG                                | 178     | 1.5 | 60 |                           | CX598342 |
| peptidylprolyl<br>isomerase B                | PPIB          | 1                      | F: GTCACTGGTGTCCGAGGCTTT<br>R: TCTGCTCTTCGGTTTGCTGC                               | 834     | 1.5 | 61 |                           |          |

|                                              |         |                 |                                                          |      |     |    |                        |          |
|----------------------------------------------|---------|-----------------|----------------------------------------------------------|------|-----|----|------------------------|----------|
| protein phosphatase 1, regulatory subunit 3C | PPP1R3C | 1               | F: ACGGCCTTTGACAAGTTCAG<br>R: GAAGACGTGAATGTCGGTGA       | 228  | 1.5 | 58 |                        | AB218745 |
| perforin 1                                   | PRF1    | 1               | F: ACTATGGCTGGGACGATGAC<br>R: AGCACTTGGCATGGTAGGAG       | 80   | 1.5 | 58 |                        |          |
| prolactin releasing hormone receptor         | PRLHR   | <b>1p16-p15</b> | F: GCTGATCGTGCTGCTCTACA<br>R: AGCAGGTTGAAGACGTGCAG       | 717  | 1.5 | 58 |                        |          |
| prosaposin                                   | PSAP    | 1               | F: AGCCATCCTTCGTGTGCT<br>R: GGGTAGCTGACTCCATGTTCT        | 426  | 1.5 | 60 |                        |          |
| retinol binding protein 3                    | RBP3    | 1               | F: TGCAGAACTCCTTGAACGAC<br>R: AGGTCTAGCACCAAGGCAGA       | 234  | 1.5 | 58 |                        | AB218747 |
| ret proto-oncogene                           | RET     | 1               | F: TTTGGTCTTGCAATGGACAG<br>R: CTAGACCCAAAGCCAGCAAG       | 201  | 2.0 | 58 | Chowdhary et al. 2003  | AY008809 |
| retinal G protein coupled receptor           | RGR     | 1               | F: CCTTGGTGTTCTTTGTGTGG<br>R: AGTCTAGGGTGCAGCACGTC       | 68   | 1.5 | 58 |                        | AB218749 |
| Rho-related BTB domain containing 1          | RHOBTB1 | 1               | F: CTGGAGTAAAGGGTTTGTGTTGG<br>R: TTCGTGATCTCCTGGTTCAT    | 276  | 1.5 | 58 |                        |          |
| RAR-related orphan receptor A                | RORA    | 1               | F: ACTACATCGACGGGCACAC<br>R: CAGTTGGGGAAGTCTCTCCAT       | 198  | 1.5 | 55 | Perrocheau et al. 2006 | DX010571 |
| RNA polymerase II associated protein 1       | RPAP1   | <b>1q23-q24</b> | F: TGCTGCAGATGAAGAGATGG<br>R: CTCACCCTGCTCCAGAAAAG       | 156  | 1.5 | 58 |                        | CX605214 |
| ribosomal protein, large, P1                 | RPLP1   | 1               | F: GGAGCCTCATCTGCAATGT<br>R: CTTTGCTTCCACTTTCTTCTCC      | 263  | 1.5 | 63 |                        |          |
| ribosomal protein S17                        | RPS17   | 1               | F: TGTCACCCACCTGATGAAAC<br>R: TCAGCATCTCCTTAGTGTCAGG     | ~670 | 1.5 | 60 |                        | DN508793 |
| ryanodine receptor 2                         | RYR2    | <b>1q13</b>     | F: AGCTTTGAGTGCTACAGACATGG<br>R: GCTGAGCTTTGGTAAGTGAACAG | 182  | 1.5 | 58 |                        |          |

|                                                             |                       |      |                                                         |         |     |       |                         |          |
|-------------------------------------------------------------|-----------------------|------|---------------------------------------------------------|---------|-----|-------|-------------------------|----------|
| ryanodine receptor 3                                        | RYR3                  | 1q24 | F: GAAGGCCTGATGAAGGAAATC<br>R: CCAGGATGACACTGAGGTGTT    | 199     | 1.5 | 55    | Perrocheau et al. 2006* | DX010573 |
| SAR1 gene homolog A ( <i>S. cerevisiae</i> )                | SAR1A ( <i>SAR1</i> ) | 1    | F: GACAATGCAGGCAAAACC<br>R: CATTCCAGCAATTGTCAGC         | 658     | 1.5 | 58    |                         |          |
| surfactant, pulmonary-associated protein A1                 | SFTPA1                | 1    | F: ATTTTGTGCTGCATGCTCTG<br>R: CTATCACCCACAACCTGGGCT     | 360     | 2.0 | 58    |                         | AF400580 |
| microsatellite                                              | SGCV02                | 1q14 | F: CCTTGAGTTGCACTTGGAGTC<br>R: CTGCTCATATACCTGGGGATT    | 123     | 3.0 | TD 64 | Godard et al. 1997*     | U90585   |
| microsatellite                                              | SGCV25                | 1q14 | F: GCCCATATTAGTAGGACTGTG<br>R: GGCCATATTCAGCAGAGCT      | 210     | 2.0 | 58    | Godard et al. 1997*     | U90603   |
| solute carrier organic anion transporter family, member 3A1 | SLCO3A1               | 1    | F: TGTTCCTGGAGCACGTTCTGT<br>R: TCCCTCCCCAGATTGTCTAA     | 238     | 1.5 | 60    |                         | CX596998 |
| slit homolog 1 ( <i>Drosophila</i> )                        | SLIT1                 | 1p14 | F: GTGGTCAGCTCTGTGAGACC<br>R: GTGAACTGCAGGTAGGTGTCC     | 199     | 1.5 | 55    | Perrocheau et al. 2006* | DX010584 |
| synuclein, gamma                                            | SNCG                  | 1    | F: AAGACCAAGGAGGGTGTGTG<br>R: CGCCACGTTCTCCACCTC        | 395     | 1.5 | 60    |                         |          |
| sorbin and SH3 domain containing 1                          | SORBS1                | 1    | F: AGTGGATCTCGCTGACTGTAG<br>R: GTGGAACGATCTGACCAACT     | 175     | 1.5 | 58    |                         |          |
| spastic paraplegia 21                                       | SPG21                 | 1    | F: TCATACTCTGACCCCGCTGATC<br>R: TTAAATTTTCCTTCCCACTCACG | 224-228 | 1.5 | 58    |                         |          |
| signal peptide peptidase-like 2A                            | SPPL2A                | 1    | F: GCATCAGCAATGAGCCTGTA<br>R: CAGCCCCAAACAACAGCTACC     | 592     | 1.5 | 58    |                         |          |
| serglycin                                                   | SRGN                  | 1    | F: GAAGTGCGCTGCTCTAATG<br>R: GGTAAAGTGGTGTGAAGTCCTG     | 142     | 1.5 | 58    |                         |          |
| suppressor of var1, 3-like 1 ( <i>S. cerevisiae</i> )       | SUPV3L1               | 1    | F: GTTCGAGACCTCCAGAAAGAG<br>R: GGTACTGCGTGTTCTTCTAGC    | 177     | 1.5 | 62    |                         |          |

|                            |               |                 |                                                          |           |     |    |                        |          |
|----------------------------|---------------|-----------------|----------------------------------------------------------|-----------|-----|----|------------------------|----------|
| tubulin folding cofactor E | TBCE          | <b>1q12-q13</b> | F: CGTTACCATCGCACTAATAGAG<br>R: ATGACAATCCAGAAGGTGAAAG   | ~ 410     | 1.5 | 58 |                        |          |
| tight junction protein 1   | TJP1          | 1q16-q17.1      | F: CATTCTATGACACACACAAGGTC<br>R: TGATTGATTAACAGAATGTGGTG | 285       | 3.0 | 58 | Chowdhary et al. 2003* | G62194   |
| microsatellite             | TKY002        | 1q17.2-q17.3    | F: TTCCCTCCCATGGTTATTTTTC<br>R: TCTCTACTTTCATATACATTTGG  | 113 - 119 | 4.0 | 58 | Sakagami et al. 1995*  |          |
| microsatellite             | TKY007        | 1p12.1          | F: CAAGGGACGTGTTGTAGTTG<br>R: TTATACCAACTGGAGGATGG       | 152       | 2.0 | 58 | Hirota et al. 2001*    | AB048318 |
| microsatellite             | TKY013        | 1q12            | F: ACTGTTCCCTTTTTAGCACC<br>R: TTAGGAAACAGGACTACTGG       | 137       | 2.0 | 58 | Hirota et al. 2001*    | AB048324 |
| microsatellite             | TKY015        | 1q12            | F: GGATTTTAGAAGTACAGAGGG<br>R: CATCCTACTGAGAACAATGCG     | 149       | 2.0 | 58 | Hirota et al. 2001*    | AB048326 |
| microsatellite             | TKY106 (RC09) | 1               | F: CTAATCTTCCTCAGCACACACA<br>R: GGTGGCCATGTATCTTTAGTCTCC | 109       | 2.0 | 58 | Mashima et al. 2001    | AB053345 |
| microsatellite             | TKY281        | 1               | F: GCTTGGACAAGCGAATAATGAC<br>R: GATCAGTCACTGCCAGTGG      | 178-194   | 2.0 | 58 | Tozaki et al. 2000b    | AB033932 |
| microsatellite             | TKY295        | 1               | F: GTCAAGTGTCAGTAGCTCTG<br>R: GTTTCTAGGCTGATGCTGTA       | 205-227   | 1.5 | 58 | Tozaki et al. 2000c    | AB034604 |
| microsatellite             | TKY318        | 1               | F: ACAGAAGTGGAGATGGTTTG<br>R: CCACAGGTTCTACTGTCTTG       | 152-170   | 1.5 | 58 | Tozaki et al. 2000c    | AB034627 |
| microsatellite             | TKY342        | 1               | F : AAGCAAGTAAGAGGAATGTG<br>R : GTTGGATTGTGTTAACCTAGTC   | 166-178   | 1.5 | 58 | Tozaki et al. 2001     | AB044843 |
| microsatellite             | TKY370        | 1               | F: CCATATCTAACCCTGATAG<br>R: CACACCACCTGGAAATGAG         | 319-323   | 1.5 | 58 | Tozaki et al. 2001     | AB044870 |
| microsatellite             | TKY374        | 1               | F: GCACTTTTGACAGTCCTTG<br>R: GTACAATCAGAGGTCCAGAG        | 153-161   | 1.5 | 58 | Tozaki et al. 2001     | AB044874 |
| microsatellite             | TKY405        | 1               | F: AATGAGGTAAACTTCCCTG<br>R: AATTCCTCAAGTTTCTCCCT        | 135       | 2.0 | 58 |                        | AB103623 |
| microsatellite             | TKY410        | 1               | F: GGAGGAGGAGAGAGTGGGCTAC<br>R: CTGGACTTTGGACGGATTTT     | 298-310   | 1.5 | 58 | Tozaki et al. 2004     | AB103628 |
| microsatellite             | TKY466        | 1               | F: TGGAACACATTCTCACCAG<br>R: GTTCTCCTTCCACCCCAAAT        | 311-323   | 1.5 | 55 | Tozaki et al. 2004     | AB103684 |
| microsatellite             | TKY492        | 1               | F: TGACGCTTACCAAGGAGGTC<br>R: ATCCTCAGAAATGCCTGGAA       | 218-228   | 1.5 | 58 | Tozaki et al. 2004     | AB103710 |

|                |        |             |                                                       |         |     |    |                       |          |
|----------------|--------|-------------|-------------------------------------------------------|---------|-----|----|-----------------------|----------|
| microsatellite | TKY530 | 1           | F: ACAAAGCTGTGTGACAGACCA<br>R: TCGTTTCTGCATCTCTTCCA   | 25-270  | 1.5 | 55 | Tozaki et al.<br>2004 | AB103748 |
| microsatellite | TKY534 | 1           | F: TCCTAATAAACTACTAATAC<br>R: AGAGAAAATGCCCTAATACC    | 136     | 2.0 | 58 |                       | AB103752 |
| microsatellite | TKY558 | 1           | F: TGGCGGATGCTAGATGTAGAG<br>R: GCTGTGGAAATGACCCAGTT   | 240-244 | 1.5 | 50 | Tozaki et al.<br>2004 | AB103776 |
| microsatellite | TKY577 | 1           | F: CTGATGATCTGCTGCACAAG<br>R: CAGCCCCTAATCACATAAAC    | 140     | 2.0 | 58 |                       | AB103795 |
| microsatellite | TKY597 | <b>1p14</b> | F: AGTGCCAAGGAGGCTGTCT<br>R: TCTTCTCCCATGAGTCACC      | 136-148 | 2.0 | 58 | Tozaki et al.<br>2004 | AB103815 |
| microsatellite | TKY659 | 1           | F: TTCAAGCAGCAGTAGCAGGA<br>R: CGAGGAGGGTTTTGTTC AAG   | 129-141 | 1.5 | 50 | Tozaki et al.<br>2004 | AB103877 |
| microsatellite | TKY670 | 1           | F: GTTGCTTTGGGACCAGTCAT<br>R: TCCAGCCCAGTCAGGTCAT     | 149-153 | 1.5 | 58 | Tozaki et al.<br>2004 | AB103888 |
| microsatellite | TKY702 | 1           | F: AGGAAGTGATATAATGGGTC<br>R: AAATGCTAGGGTGTGTAAGC    | 113     | 2.0 | 58 |                       | AB103920 |
| microsatellite | TKY704 | 1           | F: CATTTAGCGATCTCTGCCAG<br>R: CAAATCTGCTTATAGCCTCC    | 100     | 2.0 | 58 |                       | AB103922 |
| microsatellite | TKY706 | 1           | F: AGGCACTAGGCAGGGACTTC<br>R: ACCCAGGTGGTCTTGTT CAG   | 155-171 | 1.5 | 56 | Tozaki et al.<br>2004 | AB103924 |
| microsatellite | TKY707 | 1           | F: ATGTCCCCTATGAATAGGAT<br>R: CATGCATCTCCATGCCATTG    | 122     | 2.0 | 58 |                       | AB103925 |
| microsatellite | TKY728 | 1           | F: AGGAAGATTAGCAACAGATG<br>R: CCTGAGTACTTTTGTGTATG    | 90      | 2.0 | 58 |                       | AB103946 |
| microsatellite | TKY776 | 1           | F: CCTCCCAGCTTCATATACAG<br>R: AGCTTCTTGCCAAGTCTAAC    | 198     | 2.0 | 58 |                       | AB103994 |
| microsatellite | TKY791 | 1           | F: AAAGAGGAGGATTGCAACAG<br>R: TTGAAGTGAGCTCTTCCTAC    | 249     | 2.0 | 58 |                       | AB104009 |
| microsatellite | TKY803 | 1           | F: TCCAGGTGTTGGTATTAACCAA<br>R: GGATTGTGGGTACCAAAACAT | 204     | 2.0 | 58 |                       | AB104021 |
| microsatellite | TKY812 | 1           | F: AATTTCCCTTTGCCCTACT<br>R: AGTAAGTCCTACAAACACCC     | 106     | 2.0 | 58 |                       | AB104030 |
| microsatellite | TKY886 | 1           | F: GATGCTCTGTAAATGTAAAGGC<br>R: GGTGGGAAGATGGAAAAACC  | 104     | 2.0 | 58 | Tozaki et al.<br>2004 | AB104084 |

|                |         |   |                                                         |      |     |    |                       |          |
|----------------|---------|---|---------------------------------------------------------|------|-----|----|-----------------------|----------|
| microsatellite | TKY899  | 1 | F: AGCAACAGAGTAATGCCAAG<br>R: TAGGCGGGTTTTAAACATGG      | 113  | 2.0 | 58 | Tozaki et al.<br>2004 | AB104104 |
| microsatellite | TKY933  | 1 | F: GTCCCCTGATGGATGAATG<br>R: AAATGGCAGGATTTTCCTTCG      | 104  | 2.0 | 58 |                       | AB104151 |
| microsatellite | TKY941  | 1 | F: GTACATGCTCGCATGTGAG<br>R: CAAAAGGCCTCCCATATCG        | 119  | 2.0 | 58 |                       | AB104159 |
| microsatellite | TKY962  | 1 | F: TCTGGGTATTCAACTGAAGG<br>R: TCCTTCTGTTTATGGGTGAG      | 226  | 2.0 | 58 |                       | AB104180 |
| microsatellite | TKY980  | 1 | F: TTTATGCATTTGGTTGCCTTG<br>R: GGCTATGGTTACCTTATGAG     | 125  | 2.0 | 58 |                       | AB104198 |
| microsatellite | TKY987  | 1 | F: CTGTTTGTAGTGGCATCCCTG<br>R: AACCAGGGGCAATTATTCC      | 140  | 2.0 | 58 | Tozaki et al.<br>2004 | AB104205 |
| microsatellite | TKY1005 | 1 | F: GAGACGTGAATCAGAAGATTC<br>R: AAGACTGGCACAGATGTTAG     | 117  | 2.0 | 58 |                       | AB104223 |
| microsatellite | TKY1016 | 1 | F: CAATTGGTCTCTGAGGTCAG<br>R: ATGGCGGTGGATGCTAAC        | 244  | 2.0 | 58 |                       | AB104234 |
| microsatellite | TKY1020 | 1 | F: GCCTTCCTCTAGATGTAAAC<br>R: CCCAGAACTGAGAGAAAATAC     | 172  | 2.0 | 58 |                       | AB104238 |
| microsatellite | TKY1043 | 1 | F: ATCAAAGGCACTTTCCATCC<br>R: GCAGCCCTTAGGCTTTTAC       | 203  | 1.5 | 62 |                       | AB104261 |
| microsatellite | TKY1077 | 1 | F: TCCTTTCCTTTCAAGTGCAG<br>R: GACATCAGGTACTAGGAGAG      | 124  | 2.0 | 58 | Tozaki et al.<br>2007 | AB104295 |
| microsatellite | TKY1689 | 1 | F: ATTATCAGTCGTGATGCCAG<br>R: TACATGCTAGTTTTAGCCTC      | 148  | 1.5 | 58 |                       | AB215632 |
| microsatellite | TKY1785 | 1 | F: GGATTTATGACAGATGGAGT<br>R: GTTTCCTTGGATGGAGAGTG      | 202  | 1.5 | 58 |                       | AB215728 |
| microsatellite | TKY2220 | 1 | F: GAATGTACCAGGCTAGAAAG<br>R: GTTCCAGATGCTAGAAGGC       | 208  | 1.5 | 58 |                       | AB216163 |
| microsatellite | TKY2278 | 1 | F: TTGTTTTGTGGAGGGGATG<br>R: TCGCCTCAGAGGTCTGAAG        | 181  | 1.5 | 58 |                       | AB216221 |
| talin 2        | TLN2    | 1 | F: GACGGAAGTTCTTTTACTCTGATCAG<br>R: CCAATCCCCACCCAAGATA | 1308 | 1.5 | 62 | Tozaki et al.<br>2007 |          |
| TM2 domain     | TM2D3   | 1 | F: CCCAAAAGAACTTCGTCATCA                                | 159  | 1.5 | 60 |                       | DN506665 |



|                                                                                |                 |                |                                                                              |         |     |    |                                                                  |          |
|--------------------------------------------------------------------------------|-----------------|----------------|------------------------------------------------------------------------------|---------|-----|----|------------------------------------------------------------------|----------|
| containing 3<br>transmembran<br>e emp24<br>protein<br>transport<br>domain      | TMED3<br>(P24B) | 1q17.1         | R: CCAAGCAATGAATGTGGTC<br>F: CCCTTGGGAAACACCATCTA<br>R: ACTCTGTTCCCCCATGTCTG | 189     | 1.5 | 60 | Perrocheau et<br>al. 2006*                                       | CX605575 |
| containing 3<br>transmembran<br>e protein 23                                   | TMEM23          | 1              | F: ATGGGTTTAGGAAGGAGATGA<br>R: CAGCCACTGAATTAGCCATAG                         | 284     | 1.5 | 58 |                                                                  | CX599668 |
| tropomyosin 1                                                                  | TPM1            | 1              | F: CTCCCAAGACCCTTTCATCA<br>R: TTTACACTGAAATGAAGAGCTTCTG                      | 159     | 1.5 | 58 |                                                                  |          |
| thyroid<br>hormone<br>receptor<br>interactor 4                                 | TRIP4           | 1              | F: TTGTCAATTGAGAGTGCTGAAGA<br>R: GGACTGCTGCAGAACATCAG                        | 150     | 1.5 | 58 |                                                                  |          |
| tetraspanin 3                                                                  | TSPAN3          | 1              | F: ACACAGGTGTTGCACAGAGC<br>R: GCCTGGAGGTAACAGAAGCA                           | 210     | 1.5 | 60 |                                                                  | CX602714 |
| uveal<br>autoantigen<br>with coiled-<br>coil domains<br>and ankyrin<br>repeats | UACA            | 1              | F: GGGATGAAGGCAAGCTGATA<br>R: TTTCTGTCGGAATGGAAAGG                           | 156     | 1.5 | 58 |                                                                  |          |
| microsatellite                                                                 | UCDEQ440        | 1              | F: TGTTCGGACAGTGTGGAT<br>R: GCAGGGTATGTGTGTGCT                               | 100     | 1.5 | 58 | Eggleston-<br>Stott et al.<br>1999                               | U67410   |
| microsatellite                                                                 | UCDEQ487        | 1p12.1-<br>p11 | F: CCCTGGGCGGTCACATGT<br>R: AACCTGCCTCCCTTGGGTCTC                            | 135-149 | 1.5 | 55 | Eggleston-<br>Stott et al.<br>1997;<br>Chowdhary<br>et al. 2003* | U67417   |
| microsatellite                                                                 | UCDEQ493        | 1              | F: ATTGGATATTTAACACCAAATGC<br>R: CCCAGCTCAGTGACTCCATT                        | 199     | 1.5 | 58 | Chowdhary<br>et al. 2003                                         | U67418   |
| microsatellite                                                                 | UM002           | 1              | F: AGTGGCAGCATAAAGATG<br>R: TTTTGGTCCTTGTAGGAG                               | 240-260 | 5.0 | 58 | Meyer et al.<br>1997                                             | AF195124 |

|                |             |      |                                                                  |         |     |    |                                              |          |
|----------------|-------------|------|------------------------------------------------------------------|---------|-----|----|----------------------------------------------|----------|
| microsatellite | UM004       | 1q22 | F: AGGTCAGGTTCACTTTTTTC<br>R: AGGTCAGTGTGCCTAGTTG                | 92-117  | 3.0 | 55 | Meyer et al. 1997;<br>Chowdhary et al. 2003* | AF195126 |
| microsatellite | UM026       | 1    | F: CCCAAAATCAATTAGGTCTC<br>R: ATCAGTTGCTCTCTACTTTTC              | 208-220 | 1.5 | 58 | George et al. 1998                           | AF195573 |
| microsatellite | UM041       | 1    | F: TGCCCTTCCATGAACAGAC<br>R: TCCCTCTCTCTCTCTCCTTCTC              | 105-115 | 2.0 | 58 | Swinburne et al. 2000                        |          |
| microsatellite | UM043       | 1    | F: CCTCAATCTTTTCTTCTCC<br>R: TCAAGAGAGACGCTACAC                  | 145-150 | 1.5 | 58 | George et al. 1998                           | AF195586 |
| microsatellite | UMNe086     | 1    | F: GAGTCTGGATGTAGGCCTGTCC<br>R: TGGCCTTCAGGGTAAGAGAGTAAG         | 176     | 1.5 | 58 |                                              |          |
| microsatellite | UMNe090     | 1    | F: CGACACTTCCACAGTCATCTC<br>R: TCCGTGCTTTTAAGCAAGTTCC            | 149     | 1.5 | 58 | Wagner et al. 2004a                          | AY391285 |
| microsatellite | UMNe099     | 1    | F: GAGAAAGGAACACGCAAACC<br>R: CCCAGGAACCACAGACAGG                | 201     | 1.5 | 60 |                                              |          |
| microsatellite | UMNe111     | 1    | F: GGTAAGGTGAACTTTTGTATTTCTC<br>R: GATCAAAGAATTAAGTTACTTAATTAGGC | 116     | 1.5 | 58 |                                              |          |
| microsatellite | UMNe115     | 1    | F: TCCTCCTACACTGGCCATATC<br>R: TTTCCTATCGGAGTGCTTGC              | 166     | 1.5 | 58 | Wagner et al. 2004a                          | AY391296 |
| microsatellite | UMNe120     | 1    | F: TAATGTACGCGCTTTGTTC<br>R: AAGCACATTGAAAGGTTAAGGG              | 137     | 1.5 | 58 | Mickelson et al. 2003                        | AF536254 |
| microsatellite | UMNe196     | 1    | F: ATGAAAAAAGGCATACCCCC<br>R: TCTTATCAGGTTGATGGTGTGC             | 131     | 2.0 | 58 | Wagner et al. 2004a                          | AY391319 |
| microsatellite | UMNe247     | 1    | F: CACAGGCATGCTCACAGTG<br>R: AAAGCCCAGTTTGCATTTTG                | 200     | 2.0 | 58 | Mickelson et al. 2003                        | AF536315 |
| microsatellite | UMNe318     | 1    | F: CAGGGCTAGTCAACAGGCTC<br>R: TGGGGTGTAATGACTACCAGG              | 209     | 2.0 | 58 | Wagner et al. 2004a                          | AY391336 |
| microsatellite | UMNe334/420 | 1    | F: GTTTGAGAAGCACTGACTGGG<br>R: TGTCAGTGGGGAGGAGAAAC              | 243     | 2.0 | 58 |                                              |          |
| microsatellite | UMNe381     | 1    | F: ATCCCGGTAGGTGCCTAGTT<br>R: GGATGGGCAGACAGAAGTCT               | 151     | 2.0 | 62 |                                              |          |
| microsatellite | UMNe448     | 1    | F: CCATTCTGCCCTGATTGG<br>R: TTCAAGACCCCTCAATCTGC                 | 164     | 1.5 | 58 | Mickelson et al. 2004                        | AY731396 |
| microsatellite | UMNe467     | 1    | F: TTTCTGGAGGTTTCATTACATG<br>R: AGGCTATGTGAGAGAGAGGGC            | 115     | 1.5 | 62 |                                              |          |

|                                                       |          |        |                                                          |         |     |    |                                                   |          |
|-------------------------------------------------------|----------|--------|----------------------------------------------------------|---------|-----|----|---------------------------------------------------|----------|
| microsatellite                                        | UMNe471  | 1      | F: GAGCAATCACTTCCTCTGTGG<br>R: CCTTCTTCCCTCAACACAGC      | 271     | 1.5 | 60 | Wagner et al. 2004b                               | AY464495 |
| microsatellite                                        | UMNe486  | 1      | F: CAAATTATTGTTCCCTCTTGCC<br>R: GACTACTGGGCTTCACAGGC     | 217     | 1.5 | 60 | Mickelson et al. 2004                             | AY731402 |
| microsatellite                                        | UMNe498  | 1      | F: TCCCACAGCCTGAATTTTG<br>R: GCCAACCTCATAAAATGAGAGC      | ~250    | 1.5 | 55 | Wagner et al. 2004b                               | AY464506 |
| microsatellite                                        | UMNe520  | 1      | F: CTTCTTCCCCTTTGGTCTC<br>R: GCCGTTACTAGTGGATCGTAGC      | ~150    | 1.5 | 55 | Wagner et al. 2004b                               | AY464515 |
| microsatellite                                        | UMNe548  | 1      | F: GACTCATGGTGAGTTAGGGAGC<br>R: GCAACCTGGTGGTGATGAC      | ~300    | 1.5 | 58 | Wagner et al. 2004b                               | AY464523 |
| microsatellite                                        | UMNe591  | 1      | F: CAGCAGAAAGAAATGTTGATGG<br>R: ACCTACACACTGCTCATCAAGC   | 283     | 1.5 | 58 | Wagner et al. 2004c                               | AY735287 |
| vinculin                                              | VCL      | 1      | F: TGCCTGAATGTCCTTCCTTC<br>R: CTGGAAGAACTTGGAGAGCAA      | 246     | 1.5 | 58 |                                                   | AB218753 |
| voltage-dependent anion channel 2                     | VDAC2    | 1      | F: GATCATCCTTGGGCCATTTTC<br>R: GCAATCCTATCAAATCAGCAC     | 246     | 1.5 | 60 |                                                   |          |
| microsatellite                                        | VHL134   | 1p12.1 | F: CTGGGAACAGAATCAAGACTTG<br>R: TAATATGCATGTATCTGATAGCTC | 157-163 | 3.0 | 58 | van Haeringen et al. 1998; Chowdhary et al. 2003* | Y08448   |
| microsatellite                                        | VIASH034 | 1      | F: TGAGTGTTTGCGTGTGTGTG<br>R: TCCCGTCTCCTCTCTTGTTTC      | 113     | 5.0 | 55 | Chowdhary et al. 2003                             | L23549   |
| vacuolar protein sorting 13 homolog C (S. cerevisiae) | VPS13C   | 1      | F: TGGTCCTCATTCAAGAAATGG<br>R: TCATTGAGGTCTCCATTAATTCTG  | 285     | 1.5 | 58 |                                                   |          |
| X-prolyl aminopeptidase (aminopeptidase P) 1          | XPNPEP1  | 1      | F: ATCCAAGTGCTTCCCTACAAG<br>R: ATGGCTTCACTCACAGCATAG     | 119     | 1.5 | 62 |                                                   |          |
| zinc finger,                                          | ZDHHC6   | 1      | F: AGGATGGTTCCCTAGAAACTG                                 | 202     | 1.5 | 58 |                                                   | DN507548 |

|                                                         |        |   |                                                     |     |     |    |
|---------------------------------------------------------|--------|---|-----------------------------------------------------|-----|-----|----|
| DHHC-type<br>containing 6<br>zinc finger<br>protein 248 | ZNF248 | 1 | R: CTTGGAGGAAAAGAACACCTT                            |     |     |    |
| ZW10                                                    | ZWINT  | 1 | F: AACTTGCTTTCACCACCAAC<br>R: TGGCTATGACTGAGGACATTC | 304 | 1.5 | 58 |
| interactor                                              |        |   | F: GCAATGGAAAGAGCTGAAGG<br>R: GTGCTTGCTTCTTTTGGGCC  | 67  | 1.5 | 58 |

| Name                                                | Symbol            | Horse chr.   | Primers                                                | Product size (bp) | MgCl <sub>2</sub> (mM) | T <sub>a</sub> | Reference              | Accession No   |
|-----------------------------------------------------|-------------------|--------------|--------------------------------------------------------|-------------------|------------------------|----------------|------------------------|----------------|
| sequence tagged site                                | 2STS01            | 2            | F: CTGGAATCGGTCATCACCTC<br>R: ACACGCTGAAGTCCTCGTTC     | 160               | 1.5                    | 60             |                        |                |
| sequence tagged site                                | 2STS02<br>(ACADL) | 2p18         | F: TTGCCAGGGAGGAAATAGTG<br>R: CCCCAGAGAATTTGCTTCAA     | 105               | 1.5                    | 58             | Mariat et al. 2001*    |                |
| sequence tagged site                                | 2STS03            | 2            | F: CACACTGGGAGATGATTGG<br>R: TCCAGTTCACGAAGTGTTG       | 453               | 1.5                    | 55             |                        | BI961554       |
| microsatellite                                      | A-14              | 2q14-q21     | F: CAGCTGGGTGACACAGAGAG<br>R: GTCATCACTACTCCCTACAC     | 212-238           | 2.0                    | 58             | Marti et al. 1998*     | Y10238, Y10239 |
| ATP-binding cassette, sub-family E (OABP), member 1 | ABCE1             | 2            | F: GTAATGAAGCCTCTGCAAAT<br>R: CGTTTGACAACCTCGAGCAG     | 388               | 1.5                    | 58             |                        | CN789500       |
| acyl-CoA thioesterase 7                             | ACOT7             | 2            | F: GACTTCCTGTCGCCCATGT<br>R: GGATGTTCTCGGACATCACG      | 112               | 1.5                    | 55             | Perrocheau et al. 2006 | DX010633       |
| angiotensin II receptor-associated protein          | AGTRAP            | 2            | F: GACTCCATCGACGCCATAAG<br>R: TGAGACCAGCCGTAGGGTAG     | 100               | 1.5                    | 60             |                        |                |
| microsatellite                                      | AHT012            | 2            | F: ACCCAAAGTCATGGGAATCA<br>R: TTGTTGCCGACAACATGC       | 104-116           | 3.0                    | 58             | Swinburne et al. 1997  |                |
| microsatellite                                      | AHT035            | 2p15.1-p16   | F: TGACTTAGAGCTTTTGCTCCC<br>R: CCAGAAGTCCAGGCATTTGT    | 125-141           | 2.0                    | 58             | Swinburne et al. 2000* | AJ271520       |
| microsatellite                                      | AHT065            | 2            | F: AATGCAGGAAAATTATTGTCCC<br>R: TGACTTATGAAGAGGACAGAGC | 175-195           | 1.5                    | 60             | Swinburne et al. 2003  |                |
| microsatellite                                      | AHT067            | 2            | F: CGGAGTTGGTATTTAACACACG<br>R: ACGCACCAACTTCTGAAAGG   | 238-248           | 1.5                    | 58             | Swinburne et al. 2003  |                |
| microsatellite                                      | AHT073            | 2            | F: AACAGGACTGCAGAGACTCCA<br>R: CTCCCTCACTAAACTGTGACCC  | 144-156           | 1.5                    | 60             | Swinburne et al. 2003  |                |
| adherens junction associated protein 1              | AJAP1             | 2            | F: GCTTTCAACAGCTTTGACTTCC<br>R: GACCCCTTGAGTCTGCAGTG   | 228               | 1.5                    | 55             | Perrocheau et al. 2006 | DX010528       |
| alkaline phosphatase, liver/bone/kidney             | ALPL              | 2p14         | F: GAAAAGAAAGTGTCAGACTGCC<br>R: GCTCCATGTTTCCTGACAGG   | 190               | 1.5                    | 58             | Mariat et al. 2001*    |                |
| microsatellite                                      | ASB13             | 2q14.3-q21.2 | F: CTCTGAAAGAGCAGGATTGG<br>R: GTCTTCTAAGTGGTAAGAGCC    | 125               | 2.0                    | 58             | Breen et al. 1997*     |                |
| microsatellite                                      | ASB17             | 2p14         | F: GAGGGCGGTACCTTTGTACC<br>R: ACCAGTCAGGATCTCCACCG     | 130               | 2.0                    | 55             | Breen et al. 1997*     |                |
| microsatellite                                      | ASB18             | 2p17-        | F: TGCAGACAAAGCTGGACACTC                               | 205               | 2.0                    | 58             | Breen et al.           |                |

|                                                      |                   |                  |                                                                              |         |     |    |                        |           |
|------------------------------------------------------|-------------------|------------------|------------------------------------------------------------------------------|---------|-----|----|------------------------|-----------|
| ATPase type 13A2                                     | ATP13A2           | p18<br>2         | R: CTGCTGAGAAAGCTTCTGC<br>F: GCTGGCACTGAGGAACATTG<br>R: CTTCTTAGAGGCCCGTTTGG | 262     | 2.0 | 58 | 1997*                  | BI961820  |
| brain-specific angiogenesis inhibitor 2              | <b>BAI2</b>       | 2p15.1-<br>p15.3 | F: TCTTTCATGCATTTGGAAGG<br>R: TAACACTGGATCACGGACTG                           | 209     | 1.5 | 58 |                        | AJ871799  |
| chromosome 1 open reading frame 165                  | C1orf165          | 2                | F: GAAATGGCACCAGCTACAAGTA<br>R: TTGTGGCAACTCCTGTGACG                         | 116     | 1.5 | 62 |                        | NM_024603 |
| CAP, adenylate cyclase-associated protein 1          | CAP1              | 2                | F: TCGCTTTCAGCCTTTGGGAG<br>R: TCCTTTAACTGGCCTGGGTGA                          | 468     | 1.5 | 60 |                        | BI961765  |
| capping protein (actin filament) muscle Z-line, beta | CAPZB             | 2                | F: TCTTAAGAACGACCTGGTGGA<br>R: GGTGGTGATGCGAGTTGTTAT                         | 190     | 1.5 | 55 | Perrocheau et al. 2006 | DX010445  |
| carbonyl reductase 4                                 | CBR4              | 2                | F: CCTCTTTCTTCCGAGTTTGC<br>R: CCAGTCGGTAGCCTTTCC                             | 124     | 1.5 | 54 |                        |           |
| complement factor I                                  | CFI               | 2                | F: CTTCGGCTGTGCATATTCCAT<br>R: TCCCTTATCAGTGCCCAAAGA                         | 141     | 2.0 | 58 |                        |           |
| BAC end sequence                                     | CH241-100C12_SP6  | 2                | F: GCAGACCTCAATCCTTTGC<br>R: ACCTGGGACCCTGAGAG                               | 200     | 1.5 | 57 |                        | AJ542755  |
| BAC end sequence                                     | CH241-100C12_T7   | 2                | F: GCCTCATAGCTCCCTTGG<br>R: TTCCAAGTGGTGGCAGAC                               | 279     | 1.5 | 57 |                        | AJ542756  |
| BAC end sequence                                     | CH241-100G3_T7_MS | 2                | F: GGGTGAACAGTAGGGGAAAC<br>R: GAGCCCCCTCTCTACAACAG                           | 193     | 1.5 | 65 |                        | AJ542943  |
| BAC end sequence                                     | CH241-100K16_T7   | 2                | F: CAGCAAAATTATCCGATGC<br>R: ACTGCCTCCAATCTGATAGC                            | 505     | 1.5 | 56 |                        | AJ543083  |
| BAC end sequence                                     | CH241-101D21_T7   | 2                | F: GACAAAACGATTATTCAACTGG<br>R: TACCTCAGCCAACAGAGGAC                         | 502     | 1.5 | 57 |                        | AJ576582  |
| BAC end sequence                                     | CH241-102M22_SP6  | 2                | F: TCTTGGAAGTCAGCAGGTC<br>R: GGTGGGACACCTGTGTAATC                            | 500     | 1.5 | 58 |                        | AJ584460  |
| chloride channel 6                                   | CLCN6             | 2                | F: GCCACTAGAACACGTTACC<br>R: CGTCCACATCATCTCTCTCC                            | 105     | 1.5 | 56 |                        |           |
| chloride intracellular channel 4                     | CLIC4             | 2                | F: AACTTCACGTCTTCCCCTGA<br>R: AGGTAGGCGGGTAAAAGAA                            | 196     | 1.5 | 58 |                        | BM781110  |
| clusterin                                            | CLU               | 2                | F: GAGTACCGCCAGAAGAACC<br>R: CAGATTACAAGGCCGTTTTAT                           | 503     | 3.0 | 58 | Lindgren et al. 2001   | L46797    |
| cannabinoid receptor 2                               | CNR2              | 2                | F: AAGAAGGTCTTTGCCTTCTGC<br>R: TTCACATCAGCCTCTGTCTCA                         | 203     | 1.5 | 55 | Perrocheau et al. 2006 | DX010454  |
| microsatellite                                       | COR026            | 2                | F: GGCGTCCAACGTAAAGTAGA                                                      | 224-228 | 2.0 | 55 | Murphie et             | AF101395  |

|                                                             |            |                |                                                       |         |     |    |                                 |          |
|-------------------------------------------------------------|------------|----------------|-------------------------------------------------------|---------|-----|----|---------------------------------|----------|
| microsatellite                                              | COR035     | 2              | R: CCTCTTCGGAAACTCTGACA<br>F: CAAACTCACCGTATTTACGGC   | 205     | 3.0 | 55 | al. 1999<br>Murphie et al. 1999 | AF101404 |
| microsatellite                                              | COR037     | 2              | R: TTGCTTTCTCACCTCCTTTG<br>F: GAGCAATTTCTGGGTCTGAG    | 225-245 | 2.0 | 58 | Murphie et al. 1999             | AF101406 |
| microsatellite                                              | COR041/065 | 2              | R: CACCCCTCTCTTTGTTTGTC<br>F: CAACTTGGGTTCTCGCTTAG    | 223-241 | 2.0 | 58 | Ruth et al. 1999                | AF108358 |
| microsatellite                                              | COR043     | 2              | R: TCCGGAAAGTGCAAAGTTAG<br>F: ACGCTCATTTCATAGGCTCTGAC | 127-129 | 2.0 | 55 | Ruth et al. 1999                | AF108360 |
| microsatellite                                              | COR049     | 2              | R: GCAGGAGTGGTGTTTGTTTCAC<br>F: TGACATTCACAATGACCAGC  | 190-192 | 2.0 | 58 | Ruth et al. 1999                | AF108366 |
| microsatellite                                              | COR051     | 2              | R: CGGCCTGCACTATAGACTTC<br>F: GTATGGGAGAGAGCAGAATCAG  | 290-292 | 2.0 | 58 | Ruth et al. 1999                | AF108368 |
| microsatellite                                              | COR078     | 2              | R: GGTGCTAGATGTGCTCATTACT<br>F: TGCAGGGTGAAGATATGAGC  | 230     | 2.0 | 50 | Tallmadge et al. 1999a          | AF142615 |
| microsatellite                                              | COR090     | 2              | R: ACCTATGTGCACGCACTCTC<br>F: GGTTTGTCTCTTTGAGGTGTG   | 81-103  | 2.0 | 58 | Tallmadge et al. 1999b          | AF154943 |
| microsatellite                                              | COR094     | 2              | R: TGCTCATATCTTCACCCTGC<br>F: GAAGGGTAGAACAGGGCAGAC   | 283-291 | 2.0 | 58 | Tallmadge et al. 1999b          | AF154947 |
| microsatellite                                              | COR108     | 2              | R: CAGCTCTATAATTCTGGGAAGC<br>F: CAGTCCCAACCCCAAATC    | 235-237 | 1.5 | 56 | Swinburne et al. 2005           |          |
| microsatellite                                              | COR109     | 2              | R: AGCCTAGACTGGCCATGAG<br>F: GTCGAAATCTGGCTCTCAAG     | 216-217 | 1.5 | 58 | Swinburne et al. 2005           |          |
| carnitine<br>palmitoyltransferase II                        | CPT2       | <b>2p17-18</b> | R: CATCCAGAGGCATTCAAGAG<br>F: CCAGATGGCCTTTCTGAGG     | 170     | 1.5 | 58 |                                 |          |
| colony stimulating factor<br>3 receptor                     | CSF3R      | 2              | R: CTGAAGCTCCGCAGCACT<br>F: GTTTAGCTCCGTGGTGTTC       | 600     | 1.5 | 62 |                                 | BI395101 |
| cathepsin B                                                 | CTSB       | 2              | R: TCAGAATGGACACATGGTGGC<br>F: CTTCCAAAATGTGGCACCTC   | 102     | 1.5 | 55 |                                 | AY817460 |
| cytochrome P450, family<br>2, subfamily J,<br>polypeptide 2 | CYP2J2     | 2              | R: TGACCAGCTCATTTGACAGC<br>F: TGCTAGGCACTGAGGATATAAC  | 238     | 1.5 | 54 |                                 |          |
| DNA fragmentation<br>factor, 40kDa, beta<br>polypeptide     | DFFB       | 2              | R: CTACTCTACACGCACATGAC<br>F: GAGAAGAAACGCACCATTGTT   | 196     | 1.5 | 58 |                                 | DN510949 |
| 24-dehydrocholesterol<br>reductase                          | DHCR24     | 2              | R: GCTTTGTCAGGGGTTTGTAGA<br>F: TGTGGAGCCCTTGGTGA      | 898     | 2.0 | 58 |                                 |          |
|                                                             |            |                | R: TGCAGATGTGCTGGAACAG                                |         |     |    |                                 |          |

|                                                     |         |                    |                                                       |      |     |    |                                                                |           |
|-----------------------------------------------------|---------|--------------------|-------------------------------------------------------|------|-----|----|----------------------------------------------------------------|-----------|
| dehydrogenase/reductase (SDR family) member 3       | DHRS3   | 2                  | F: CTGAAAAATGCCTGAAGGAGA<br>R: AGCTGTCTGGTACACCTCCTC  | 107  | 1.5 | 55 | Perrocheau et al. 2006                                         | DX010576  |
| endothelin converting enzyme 1                      | ECE1    | 2                  | F: CAAGGATGGGAACCTCCG<br>R: TGTAGTTGCCGTACTGCC        | 95   | 2.0 | 58 | Chowdhary et al. 2003                                          |           |
| eukaryotic translation initiation factor 2C, 1      | EIF2C1  | <b>2p15-p16</b>    | F: TGAGCCCCCAAGACTACAC<br>R: TGAAGATACCAAGGGAGTGG     | 113  | 1.5 | 60 |                                                                | AJ891045  |
| eukaryotic translation initiation factor 4 gamma, 3 | EIF4G3  | 2                  | F: TTCCTGTTCTCCGAAGCAC<br>R: TGTTTCATCATTCGCTTTGTCC   | 102  | 2.0 | 50 | Chowdhary et al. 2003                                          |           |
| enolase 1                                           | ENO1    | 2                  | F: GCTTCCTTAGAACCGCTACAG<br>R: CACGGCTCCAGACACTTG     | 134  | 1.5 | 58 |                                                                | CX602735  |
| exosome component 10                                | EXOSC10 | 2                  | F: GCTGCCAAGAAGAGAGAAC<br>R: GGATCAAACCTGGGAAGAAG     | 1050 | 1.5 | 58 |                                                                | BI961526  |
| fatty acid amide hydrolase                          | FAAH    | 2                  | F: GACTGCAGTAACCCCTCTTT<br>R: GGTTCCCTGTGGGTTTGAG     | 196  | 1.5 | 55 | Perrocheau et al. 2006                                         | DX010472  |
| fatty acid binding protein 2                        | FABP2   | <b>2q22-24</b>     | F: CGGTTAGACAACGGAAATGAA<br>R: TCCAAGAACAATGCTCACTCC  | 572  | 1.5 | 58 |                                                                |           |
| Fas associated factor 1                             | FAF1    | 2                  | F: TTGCCACTTTTAATTGATTTTC<br>R: CATCATATTCACCACCCAAAG | 504  | 1.5 | 57 |                                                                | AJ543260  |
| family with sequence similarity 54, member B        | FAM54B  | 2                  | F: CTTCAAGTTCAGGAGCCGGT<br>R: TGGTCCCGATTCTTCTCACT    | 630  | 1.5 | 58 |                                                                | NM_019557 |
| filamin binding LIM protein 1                       | FBLIM1  | 2                  | F: AAGTGTGGCAAGTGTGGC<br>R: GGATTCTCACAGATGCTGCA      | 203  | 1.5 | 58 |                                                                |           |
| farnesyl-diphosphate farnesyltransferase 1          | FDFT1   | <b>2q13</b>        | F: CTGCGAGCTCTGGACACTCT<br>R: CGTTGGGAAGTCCTCTAGCA    | 156  | 2.0 | 62 |                                                                | CX598027  |
| fibrinogen alpha chain                              | FGA     | <b>2q14.3-21.2</b> | F: GACTCTGTCCTTCGGGTGTA<br>R: AGCCTCCTCCGTAGACTTCC    | 259  | 1.5 | 58 |                                                                |           |
| fibrinogen beta chain                               | FGB     | <b>2q14.3-21.2</b> | F: TCGGAAATGACAGAATTAGCC<br>R: GGTTTTCTCCCACCAGTTGA   | 213  | 2.0 | 50 |                                                                |           |
| fibrinogen gamma chain                              | FGG     | 2q21               | F: ACTTCTCGGGGTATTGCAG<br>R: AGCCAAAGATTGAGCAATGG     | 191  | 2.0 | 58 | Caetano et al. 1999; Lindgren et al. 2001* Godard et al. 2000* | AF134218  |
| fucosidase, alpha-L- 1                              | FUCA1   | 2p15               | F: CATTGGACCAACTAAAGATG<br>R: TAGATAGCCTCCCCATTGAT    | 100  | 1.5 | 55 |                                                                |           |
| guanine nucleotide binding protein, beta            | GNB1    | 2                  | F: ACACACCGGGGATGTTATGAG<br>R: ATCCGCACGAAGGTCAAACAG  | 229  | 1.5 | 60 |                                                                | CD467307  |



|                                                       |          |                   |                                                           |         |     |    |                         |           |
|-------------------------------------------------------|----------|-------------------|-----------------------------------------------------------|---------|-----|----|-------------------------|-----------|
| polypeptide 1                                         |          |                   |                                                           |         |     |    |                         |           |
| guanine nucleotide binding protein-like 2             | GNL2     | 2                 | F: CACCAAGGCGGTCATTAAAGC<br>R: GCAAACACCTTTTCAGTGAGTCCC   | 300     | 2.0 | 58 |                         | BI961871  |
| G protein-coupled receptor 3                          | GPR3     | 2p14              | F: AATGAACGGAGAAGCAGAAAGGC<br>R: ACTGCGGTGCAGGTTGGAGG     | 100     | 2.0 | 58 | Mariat et al. 2001*     |           |
| hypocretin (orexin) receptor 1                        | HCRT1    | 2                 | F: GTATCTCCCAAAAGAACACCC<br>R: AGGTTTCCCCAGAAGACAC        | 105     | 1.5 | 56 |                         |           |
| histone deacetylase 1                                 | HDAC1    | 2                 | F: AAGTTGGCTTGAGCAGACCTCT<br>R: AGGATTTTGTCTTATGGCTGCTTAA | 301     | 3.0 | 58 | Chowdhary et al. 2003   |           |
| high-mobility group box 2                             | HMGB2    | 2                 | F: GATCCCAATGCTCCTAAAAG<br>R: TTGCAGTATCCCCAATGGAT        | 182     | 1.5 | 56 |                         |           |
| microsatellite                                        | HMS16    | <b>2q13-q14.1</b> | F: AGTGTAATCAATGGATGAGTGGAC<br>R: TGTGTGTCGAAATGGCAGGCATC | 148     | 3.0 | 58 | Godard et al. 1997      | U89806    |
| heterochromatin protein 1, binding protein 3          | HP1BP3   | 2                 | F: GCAGCTGGGACTTTAGGT<br>R: CCAAAGAAAGAGCCAGATG           | 641     | 3.0 | 58 | Chowdhary et al. 2003   |           |
| heparan sulfate proteoglycan 2                        | HSPG2    | 2p14              | F: CGTCTGCCCCAGGTATCAC<br>R: CTGTGGAGGACAGAGACGATG        | 104     | 1.5 | 55 | Perrocheau et al. 2005* | AY817475  |
| microsatellite                                        | HTG19    | 2                 | F: GTATGTGCTGTACCTTCTGC<br>R: ATGAGAAAGACGATAGATGATAT     | 130-144 | 3.0 | 58 | Lindgren 2000*          |           |
| 5-hydroxytryptamine receptor 6                        | HTR6     | 2p12-13           | F: CTCACCTTCTTCTGCCCTC<br>R: AAGGCGGGAACAGGAAATGG         | 350     | 1.5 | 59 | Prause et al. 2006*     |           |
| ISG15 ubiquitin-like modifier                         | ISG15    | 2                 | F: CTTGTCTGTCAGAACTGTGAC<br>R: CCTCGAAAGTCAGCCAGAAC       | 166     | 1.5 | 60 |                         | BM735112  |
| potassium channel tetramerisation domain containing 9 | KCTD9    | 2                 | F: TGCTGATCTTTCTCGTTTGG<br>R: GATCAGCTCGCTCCAGATTC        | 110     | 1.5 | 60 |                         |           |
| KIAA0922                                              | KIAA0922 | 2                 | F: CACTCACTCACAGCACTGAC<br>R: TCCCTGCTTCATTCTTGGCT        |         | 1.5 | 60 |                         |           |
| kinesin family member 1B                              | KIF1B    | 2                 | F: TTTTGTTCATAGTCCGTCGCC<br>R: ACCAGTCATTTCATGTCTTTGTC    | 209     | 1.5 | 58 |                         |           |
| kelch-like 2                                          | KLHL2    | 2                 | F: GCCACTTCTGAGGAATGA<br>R: CTGATCAACGCACATAGC            | 314     | 1.5 | 58 |                         | BI961843  |
| lysosomal associated multispanning membrane protein 5 | LAPTM5   | 2                 | F: GGGTGGACCATTCTCCTG<br>R: AGATGACGGCCAATTTGAG           | 183     | 1.5 | 55 |                         | AM072953  |
| leucine proline-enriched proteoglycan 1               | LEPRE1   | 2                 | F: TGATGGACGGCGTCATCTCT<br>R: CTTGAGGGCTTTGAAGACAG        | 319     | 1.5 | 58 |                         | NM_022356 |

|                                                      |                   |                         |                                                        |     |     |    |                                                       |                     |
|------------------------------------------------------|-------------------|-------------------------|--------------------------------------------------------|-----|-----|----|-------------------------------------------------------|---------------------|
| lipoprotein lipase                                   | LPL               | <b>2q12<sup>a</sup></b> | F: CAGAAGCTCCAGTCGCTTTC<br>R: CCTCCATTGGGGTAAATGTC     | 137 | 2.0 | 60 |                                                       | AZ575478            |
| leucine rich repeat<br>containing 41                 | LRRC41            | 2                       | F: CTTCGCAGATTATGTCAGCAC<br>R: CTAAACCCAGTTGTGGGAATG   | 217 | 1.5 | 65 |                                                       | CX599691            |
| MAD2 mitotic arrest<br>deficient-like 2              | MAD2L2            | 2                       | F: GCGGGCTCATAAAAGCAG<br>R: AAGAGCACTTGCAGTCAGGG       | 118 | 2.0 | 58 |                                                       | BI961750            |
| mannosidase, alpha, class<br>1C, member 1            | MAN1C1            | 2                       | F: CGAGGCCCTTCTGGTTTAACTC<br>R: ACTCCCTGTAGATGGGGTCGT  | 137 | 1.5 | 55 | Perrocheau<br>et al. 2006                             | DX010506            |
| microtubule-associated<br>protein 9                  | MAP9              | 2                       | F: TTTCTGACACCTCAGTAGATGAA<br>R: AGGGATTTATGACCACGTCTT | 210 | 1.5 | 54 |                                                       | CX600044            |
| matrilin 1                                           | MATN1             | 2p15                    | F: CTTTAAGATGTTTGCTGTGG<br>R: GCCGTGTAGAAGTAGTGCTC     |     |     |    | Godard et<br>al. 2000*                                |                     |
| mitochondrial trans-2-<br>enoyl-CoA reductase        | MECR              | 2                       | F: CTGCTATGGGCGGATCAGAT<br>R: GCTTGGGAAGGATGCCGTAA     | 553 | 1.5 | 58 |                                                       | NM_016011           |
| mitochondrial ribosomal<br>protein S15               | MRPS15            | 2                       | F: TCCACGCTGCTCAAAGACTA<br>R: CTGGGGGTATTGACAAGTGG     | 725 | 1.5 | 60 |                                                       | BC031336            |
| methionine sulfoxide<br>reductase A                  | MSRA              | 2                       | F: GTTCTTTCAGAGCACGGCTA<br>R: ACCCAGTGGACAGGACACTC     | 153 | 1.5 | 60 |                                                       |                     |
| matrix-remodelling<br>associated 8                   | MXRA8             | 2                       | F: GCAGCGTCATCAACGTCAT<br>R: GATGAGCAGCAGGATGAAGAG     | 101 | 1.5 | 55 | Perrocheau<br>et al. 2006                             | DX010526            |
| NMDA receptor regulated<br>1                         | NARG1             | 2q21.3                  | F: GTTAGAGCAATGCAGCAGGTG<br>R: AAGCTTTTCCCTTACGCTTTG   | 199 | 1.5 | 55 | Perrocheau<br>et al. 2006*                            | DX010627            |
| nuclear autoantigenic<br>sperm protein               | NASP              | 2                       | F: AAGGCTCAGAAGAGGAGGAT<br>R: TATCCCAGGCAAGCTCTAGG     | 550 | 1.5 | 58 |                                                       | NM_172164           |
| neuroblastoma,<br>suppression of<br>tumorigenicity 1 | NBL1              | 2                       | F: CCAAAAACATCACCCAGATC<br>R: TGTAGCTGAAGCACTGTCCC     | 213 | 1.5 | 58 |                                                       | NM_182744           |
| nuclear transcription<br>factor Y, gamma             | NFYC              | 2                       | F: ATGTTTCATCCAGTCAGCCAAC<br>R: GTTGTGCACCAGTGTCTTAGC  | 198 | 1.5 | 55 | Perrocheau<br>et al. 2006                             | DX010535            |
| NK3 transcription factor<br>related, locus 1         | NKX3-1<br>(NKX3A) | <b>2q13</b>             | F: CTTCTCGCACACTCAGGTCAT<br>R: GAGAAGGCCTCCTCTTTCAGA   | 229 | 3.0 | 58 |                                                       |                     |
| nicotinamide nucleotide<br>adenylyltransferase 1     | NMNAT1            | 2                       | F: TGTGTGGGGCAGATTTACTG<br>R: ATCATTTCCAGCCCGAGTA      | 116 | 1.5 | 54 |                                                       |                     |
| natriuretic peptide<br>precursor A                   | NPPA              | 2p14-<br>p13            | F: GATAACAGCCAGGGAGGACA<br>R: CTGGGGAAGCCACAATTAAG     | 210 | 2.0 | 58 | Caetano et<br>al. 1999;<br>Milenkovic<br>et al. 2002* | AF134229,<br>X58563 |

|                                                                  |         |             |                                                          |     |     |    |                                          |           |
|------------------------------------------------------------------|---------|-------------|----------------------------------------------------------|-----|-----|----|------------------------------------------|-----------|
| nardilysin (N-arginine dibasic convertase)                       | NRD1    | 2           | F: GTATGAGCTGGAAGAGGATGG<br>R: GGTAAAGCGTCGATGTGAAAG     | 152 | 1.5 | 58 |                                          | CX605734  |
| oxysterol binding protein-like 9                                 | OSBPL9  | 2           | F: GCTCATGGAATAGTCTAAAGCG<br>R: CATCATCTCTATCATCGTGTGAA  | 533 | 1.5 | 58 |                                          | NM_148904 |
| poly(A) binding protein, cytoplasmic 4                           | PABPC4  | 2           | F: AAGCTGAGCTTGGAGCCAAA<br>R: CTTTGGATTTCCTACTGGGA       | 329 | 1.5 | 58 |                                          | NM_003819 |
| protocadherin 18                                                 | PCDH18  | 2           | F: GTAAGCTTCATGGACATGGT<br>R: CCATTTTCTCCAAGATCAGG       | 304 | 1.5 | 58 |                                          | CF368035  |
| PDZ and LIM domain 2                                             | PDLIM2  | <b>2q13</b> | F: GAGCTGTACTGCGAGAAGCA<br>R: ATCCCATGCCCACTTGTTAC       | 152 | 1.5 | 60 |                                          | CX596726  |
| phosphogluconate dehydrogenase                                   | PGD     | 2p12-p13    | F: GCCTTTGAGGAATGGAATAAGA<br>R: GTACTCCAGGGCGGAGATG      | 168 | 1.5 | 55 | Gu et al. 1992*; Perrocheau et al. 2006; | DX010555  |
| polo-like kinase 3                                               | PLK3    | 2           | F: ATGCCCTTCTGGTGCAAGTA<br>R: AAACCTGGAGCCCTGACTCT       | 100 | 1.5 | 60 |                                          |           |
| procollagen-lysine 1, 2-oxoglutarate 5-dioxygenase 1             | PLOD1   | 2           | F: GGTTCTGCGTTACAAGTCT<br>R: CAGGCTTGCCGATTAGG           | 169 | 1.5 | 58 |                                          |           |
| prepronociceptin                                                 | PNOC    | <b>2q13</b> | F: CATGTGGTGGCTGCTCTTTA<br>R: CCTCTTCTGCAGCTGCTTCT       | 156 | 2.0 | 58 | Chowdhary et al. 2003                    | AY011855  |
| phosphatidic acid phosphatase type 2B                            | PPAP2B  | 2           | F: CCGGATCTATTACCTGAAGG<br>R: TCTGGCTGAAATCAGGGTTG       | 200 | 1.5 | 58 |                                          | NM_003713 |
| protein kinase, AMP-activated, alpha 2 catalytic subunit         | PRKAA2  | 2p18-p17    | F: AAAAGGAAGAAAGTAGTGGG<br>R: CAGTAATAGCAGTAAAAGCAG      | 364 | 1.5 | 60 | Dranchak et al. 2006*                    |           |
| PRP38 pre-mRNA processing factor 38 (yeast) domain containing A  | PRPF38A | 2           | F: AGAGTCCAAGACGTCACCGC<br>R: GGAGACTTTGAGTGGCTCCTG      | 587 | 1.5 | 60 |                                          | NM_032284 |
| surfactant, pulmonary-associated protein C                       | SFTPC   | <b>2p13</b> | F: CCACATCCATCTCTCCCTGT<br>R: GAACCCGAGTTCATTCAGGA       | 202 | 2.0 | 58 | Shubitowski et al. 2001                  | AY008813  |
| solute carrier family 10, member 7                               | SLC10A7 | 2           | F: CGAGCACCTCTCGTTAATATC<br>R: CCTTGACACCATCCAAGAC       | 106 | 1.5 | 59 |                                          | DN504501  |
| SWI/SNF related, matrix associated, actin dependent regulator of | SMARCA5 | 2q21        | F: GAAGCTGAAACTATGAATACATA<br>R: CTACATACTATGTTTCTAGCTCG | 164 | 3.0 | 58 | Lear et al. 2001                         | G62205    |

|                                                               |        |                     |                                                          |         |     |    |                            |           |
|---------------------------------------------------------------|--------|---------------------|----------------------------------------------------------|---------|-----|----|----------------------------|-----------|
| chromatin, subfamily a,<br>member 5                           |        |                     |                                                          |         |     |    |                            |           |
| spermatogenesis<br>associated 5                               | SPATA5 | 2                   | F: TCAAGAGAAGAGTGGGCTACA<br>R: ACACGTGATGCCTACAGGTTTG    | 393     | 1.5 | 58 |                            | CX605537  |
| serine/threonine kinase 40                                    | STK40  | 2                   | F: CACGGATGACTTCTATCAGC<br>R: AAAGCAGAGAGTACTCGGTG       | 473     | 1.5 | 62 |                            | NM_032017 |
| stathmin-like 4                                               | STMN4  | 2q13                | F: GGACCTGAACTGGTGTGTCAT<br>R: TCAGCTGCTTCCAGTTTCTTC     | 186     | 1.5 | 55 | Perrocheau<br>et al. 2006* | DX010591  |
| TBC1 domain family,<br>member 9                               | TBC1D9 | 2                   | F: GGCCATCTTTCCAGTTAAATCAG<br>R: CAATAAAGTAAAGGAGGGTGCTG | 317     | 1.5 | 58 |                            | BI961809  |
| transcription elongation<br>factor B (SIII),<br>polypeptide 3 | TCEB3  | 2                   | F: ATCAAGTACGATCTCTGCTCCC<br>R: AGGAATTATCATGGCCCCACAC   | 199     | 1.5 | 58 |                            |           |
| testis nuclear RNA-<br>binding protein                        | Tenr   | <b>2q22-<br/>23</b> | F: CAATGACTGGTTTCAGAGTTC<br>R: GTGCAAACCTGGTGCAAGG       | 921     | 1.5 | 62 |                            | AJ693294  |
| microsatellite                                                | TKY003 | 2p15.1-<br>p15.3    | F: GGTTACACAGGAGTCAGGGA<br>R: CCTTCTGGTTTGCCTCGTCTC      | 162-168 | 2.0 | 58 | Tozaki et al.<br>1995*     | AB048314  |
| microsatellite                                                | TKY024 | 2p14-<br>p16        | F: GATCCAACAGCAGCAACAGCAG<br>R: AGTGGCATGGCATGAGCTTC     | 151     | 2.0 | 58 | Hirota et al.<br>2001*     | AB048334  |
| microsatellite                                                | TKY313 | 2                   | F: TGTAGTGCCAGAAAGTAAGG<br>R: GACTCCTGCATGTCTTTAAC       | 120-122 | 1.5 | 58 | Tozaki et al.<br>2000c     | AB034622  |
| microsatellite                                                | TKY335 | 2                   | F: TGAGAGTAGTAACCTGCATC<br>R: TAGGCAAGTCTCAGTTTTCC       | 268-274 | 1.5 | 58 | Tozaki et al.<br>2001      | AB044836  |
| microsatellite                                                | TKY340 | 2                   | F: CAGGCTTTGGGTTTCATTATG<br>R: TCAGTCTCCATTATAGGAGG      | 147-169 | 1.5 | 56 | Tozaki et al.<br>2001      | AB044841  |
| microsatellite                                                | TKY358 | 2                   | F: GAAGCAGTGCCTCTTATGTG<br>R: CAGAACAGTCAGGACTTGAC       | 173-183 | 1.5 | 58 | Tozaki et al.<br>2001      | AB044858  |
| microsatellite                                                | TKY381 | 2                   | F: AGGTGTTGAAGTCTAAATCC<br>R: TGTCCCTTGGTCACTTAATC       | 204-216 | 2.0 | 55 | Tozaki et al.<br>2001      | AB044881  |
| microsatellite                                                | TKY384 | 2                   | F: TGCAGCAAGAAACCTAAACA<br>R: CTTCAAGTTGTAATCAGGCTC      | 114-120 | 1.5 | 54 | Tozaki et al.<br>2001      | AB048290  |
| microsatellite                                                | TKY474 | 2                   | F: TGTCCTACTTCCCAGCTACG<br>R: CCTGCCTTTGCAGTTCAGTG       | 153-157 | 1.5 | 55 | Tozaki et al.<br>2004      | AB103692  |
| microsatellite                                                | TKY483 | 2                   | F: AAAACAGATTCCTTAAATATACACAA<br>R: TTACAGTTCAACGGCCTGTC | 203-209 | 1.5 | 58 | Tozaki et al.<br>2004      | AB103701  |
| microsatellite                                                | TKY497 | 2                   | F: CAGGAAACTGAGGCTTGAGG<br>R: GCCACATCTATGCAGCTTGA       | 288-300 | 1.5 | 58 | Tozaki et al.<br>2004      | AB103715  |

|                |         |   |                                                          |         |     |    |                    |          |
|----------------|---------|---|----------------------------------------------------------|---------|-----|----|--------------------|----------|
| microsatellite | TKY511  | 2 | F: AGGAAATGAGGACCGAGAGG<br>R: TGCAGGCCTTGTTACTTGTG       | 195-213 | 1.5 | 58 | Tozaki et al. 2004 | AB103729 |
| microsatellite | TKY605  | 2 | F: AGTGCCATCTTGAATTGCTG<br>R: CGATGAAATTGAGGATTTATGGA    | 158-162 | 1.5 | 58 | Tozaki et al. 2004 | AB103823 |
| microsatellite | TKY615  | 2 | F: CCAGACCCACCCAAAAGATA<br>R: GGGCAAAGTGGTCTGAGAAG       | 243-263 | 1.5 | 58 | Tozaki et al. 2004 | AB103833 |
| microsatellite | TKY645  | 2 | F: CGATATAAGGAAGATGGCATAAAG<br>R: TCTCTCTCCCAATCTTTCATC  | 122-124 | 1.5 | 58 | Tozaki et al. 2004 | AB103863 |
| microsatellite | TKY701  | 2 | F: TTTTGCAGTATGGCTCATGG<br>R: CTGAATGGGAATTTGAGGTGA      | 221-225 | 1.5 | 56 | Tozaki et al. 2004 |          |
| microsatellite | TKY718  | 2 | F: GGTGTGTTTCACTCCATCCTG<br>R: CCTACTCCAGAAAGCAACTC      | 143     | 2.0 | 58 |                    | AB103936 |
| microsatellite | TKY777  | 2 | F: TGTCTGCCTTAGAGGAGG<br>R: TGATGGTGTGAATGGTGTGTTGG      | 97      | 2.0 | 58 |                    | AB103995 |
| microsatellite | TKY784  | 2 | F: GATCAGTACTTTGCAAATGGATAAC<br>R: GTAACCTCCAAGGCTACGTTC | 202     | 2.0 | 58 | Tozaki et al. 2004 | AB104002 |
| microsatellite | TKY842  | 2 | F: ACATTTGACGTGACCTCTCA<br>R: GGCAAGCTCAGTGTAGTAAA       | 106     | 1.5 | 62 | Tozaki et al. 2004 | AB104060 |
| microsatellite | TKY850  | 2 | F: TGGTTTGCTGGTTTTGCCTC<br>R: AGACATAGGTATTGACTGGG       | 152     | 2.0 | 58 | Tozaki et al. 2004 | AB104068 |
| microsatellite | TKY903  | 2 | F: TCAAGTTCTTGCAATCCCAG<br>R: CTGAGCCTCACAGATGAAC        | 218     | 2.0 | 58 | Tozaki et al. 2004 | AB104121 |
| microsatellite | TKY944  | 2 | F: CACCTCTGCACATTTTTTCTC<br>R: GCTGCTTCAGGAAGAAGAG       | 146     | 2.0 | 58 |                    | AB104162 |
| microsatellite | TKY965  | 2 | F: ACAAGGGCTACTTTAAGTGC<br>R: TATTTGCACTCTGAGCACTG       | 234     | 2.0 | 58 |                    | AB104183 |
| microsatellite | TKY974  | 2 | F: ATGCCATCTCTAGCTGCTG<br>R: TGTCTAGGCACTGACCATC         | 270     | 2.0 | 58 |                    | AB104192 |
| microsatellite | TKY1054 | 2 | F: AACATTTACACACGTGCAGC<br>R: AAGTCTGTTGGTTTTGGAGG       | 208     | 2.0 | 58 |                    | AB104272 |
| microsatellite | TKY1142 | 2 | F: CTACATTGAACATCTATTGCTC<br>R: AAGAATGCCCCCTCATATAG     | 301     | 2.0 | 58 |                    | AB104360 |
| microsatellite | TKY1171 | 2 | F: TTTGCAGACCTGACAGCTG<br>R: GCCATAAGTCTGGGTGATG         | 252     | 2.0 | 58 |                    | AB104389 |
| microsatellite | TKY1192 | 2 | F: TTTCATTCAACTCAGTGCCA<br>R: TCTGGGTAGCCTAACCTTG        | 198     | 1.5 | 58 | Tozaki et al. 2007 | AB215135 |
| microsatellite | TKY1907 | 2 | F: TGTCCAAGAGCTTAAAATGC                                  | 217     | 1.5 | 58 | Tozaki et al.      | AB215850 |

|                                                             |          |                  |                                                                               |         |     |    |                                    |          |
|-------------------------------------------------------------|----------|------------------|-------------------------------------------------------------------------------|---------|-----|----|------------------------------------|----------|
| microsatellite                                              | TKY2565  | 2                | R: GATCAATTCCTCCACTCAAT<br>F: CCCGCAGAAATTGACATTTA<br>R: TGCCTTCCATTCTATCAGGA | 228     | 1.5 | 58 | 2007<br>Tozaki et al.              | AB216508 |
| microsatellite                                              | TKY2717  | 2                | F: GTTTCTAGCCCCCAGTTCTC<br>R: TCTTCAGGTAGAGACAGGTAAGC                         | 218     | 1.5 | 58 | 2007<br>Tozaki et al.              | AB216660 |
| microsatellite                                              | TKY2970  | 2                | F: ATTTGAATCCTGATGGCAGA<br>R: AACAAAGCAGCCAGCTAAAAA                           | 227     | 1.5 | 58 | 2007<br>Tozaki et al.              | AB216913 |
| toll-like receptor 2                                        | TLR2     | 2q14.3-<br>q21.1 | F: CAGGAGCTGGAGCACTTCAA<br>R: GAAGAATGAGAATGGCAGCA                            | 229     | 1.5 | 60 | Musilova et<br>al. 2005*           |          |
| transmembrane protein 34                                    | TMEM34   | 2                | F: TGCAGAGAATGTTACGAAGC<br>R: GTGGACAGCAACATAAAGGAG                           | 145     | 1.5 | 58 |                                    | CX596283 |
| transmembrane protein 59                                    | TMEM59   | 2                | F: AACTAAGGTGACTGACGGCATC<br>R: AGTTACCCAAATCTGTGAAGACTG                      | 227     | 2.0 | 58 |                                    |          |
| tumor necrosis factor<br>receptor superfamily,<br>member 18 | TNFRSF18 | <b>2p12</b>      | F: GGGAGTTTTCTGTTTTGGCTTC<br>R: ACGGCATTGTGCGTCTTGTT                          | 308     | 1.5 | 60 |                                    | CD535912 |
| TNFAIP3 interacting<br>protein 3                            | TNIP3    | 2                | F: GTCTGGTAATGTTTCACTCTGGCA<br>R: GTTTCAAGAAGTGGCGCATAATCC                    | 156     | 1.5 | 58 |                                    | BI961939 |
| translocation associated<br>membrane protein 1-like<br>1    | TRAM1L1  | 2                | F: GGGACTTGTTCTCCTGATGAT<br>R: TAGGCTTGGATAGTGCAACTG                          | 276     | 1.5 | 58 |                                    |          |
| tetratricopeptide repeat<br>domain 4                        | TTC4     | 2                | F: TGCCTCCAGTCCATTATTTTC<br>R: AAGGACAGCATTCAAATCAGG                          | 900     | 1.5 | 54 |                                    | CX601532 |
| microsatellite                                              | UCDEQ380 | 2                | F: GTGGGATGGGGTAGGAAC<br>R: ACTGGGAAGTGCTGCAAA                                | 129-133 | 2.0 | 58 | Eggleston-<br>Stott et al.<br>1999 | U67403   |
| uncoupling protein 1                                        | UCP1     | <b>2q22</b>      | F: AACAAACAGAAGGCTTGACGG<br>R: ACCAGGGCCTCCTTCATTAG                           | 220     | 1.5 | 58 |                                    |          |
| UDP glycosyltransferase<br>8                                | UGT8     | <b>2q24</b>      | F: TCTGAAGGCAGAGACATCG<br>R: GGCCGGTTTGGTTAGGAT                               | 639     | 1.5 | 58 |                                    | AF129810 |
| microsatellite                                              | UM007    | 2                | F: GGGAATAGAGAAAGGTGAAG<br>R: TTAGAGTTCCTGCTCCTCC                             | 115-150 | 2.0 | 58 | Meyer et al.<br>1997               | AF195128 |
| microsatellite                                              | UM029    | 2                | F: CTTTCATCTTTTGGCCCC<br>R: CTGTCTTGCTTTCCACC                                 | 190     | 2.0 | 58 | George et<br>al. 1998              | AF195576 |
| microsatellite                                              | UMNe076  | 2                | F: CCCTCAGGTTGAGGACTCAG<br>R: AGGTGACAACCTGGATTTGC                            | 98-102  | 2.0 | 58 | Roberts et<br>al. 2000             | AF191706 |
| microsatellite                                              | UMNe080  | 2                | F: GGGTTTGGGACTTTTGTCTAGG                                                     | 125     | 1.5 | 58 | Mickelson                          | AF536242 |

|                    |         |             |                                                        |         |     |    |                       |          |
|--------------------|---------|-------------|--------------------------------------------------------|---------|-----|----|-----------------------|----------|
| microsatellite     | UMNe129 | 2           | R: TCCAAGGACGACAGTACTTCTCTG<br>F: GGACTTCCCAGCCTCCAG   | 169     | 1.5 | 62 | et al. 2003           |          |
| microsatellite     | UMNe205 | 2           | R: GCAGGGTGCTATTTTGAGATG<br>F: TGGAGAAAAGGCTGATTCTAGG  | 187     | 2.0 | 58 | Mickelson et al. 2003 | AF536257 |
| microsatellite     | UMNe226 | 2           | R: GCCATGGAAACCATGGAG<br>F: TAGAACAGGCCAGAAAAGTTGTG    | 200     | 2.0 | 58 | Mickelson et al. 2003 | AF536288 |
| microsatellite     | UMNe236 | 2           | R: CAGAATGAGGCCAAGAACTTG<br>F: CAGAACGTGCAAACCTTAACTGC | 155     | 2.0 | 55 | Mickelson et al. 2003 | AF536302 |
| microsatellite     | UMNe242 | 2           | R: TTTGTTGAACTGACAAAATCCG<br>F: CCCACCACTCCATTCTGC     | 169     | 2.0 | 58 | Mickelson et al. 2003 | AF536307 |
| microsatellite     | UMNe323 | 2           | R: GCAGAACATGCGAACTTAACC<br>F: GATCCTGCAGGAAAGCATGT    | 185     | 2.0 | 58 | Mickelson et al. 2003 | AF536312 |
| microsatellite     | UMNe330 | 2           | R: CCGCTCGGAATATTTTCATTG<br>F: AAACATGGAACCAGAGGGG     | 129     | 1.5 | 58 | Wagner et al. 2004a   | AY391338 |
| microsatellite     | UMNe336 | 2           | R: TCTCCAGCGTATTTGGTTAGTG<br>F: ACCTTCTCTTTGGAAGGAAATG | 119     | 1.5 | 58 | Wagner et al. 2004a   | AY391341 |
| microsatellite     | UMNe374 | 2           | R: GAGACCTAAGCATGGAGCATG<br>F: AATTTTCATATGGTTTCCATGCC | 194     | 2.0 | 58 | Mickelson et al. 2004 | AY731385 |
| microsatellite     | UMNe396 | 2           | R: TAAGCACTGCGTTAATGTTCTG<br>F: CAGATTTTGGTTATGAGGAGCG | 168     | 1.5 | 58 | Wagner et al. 2004a   | AY391356 |
| microsatellite     | UMNe405 | <b>2q13</b> | R: TGCTGTAGAAGCAGTAGGTTCCG<br>F: TTTTCCATCTGGGAATCAGG  | 234     | 2.0 | 58 | Mickelson et al. 2004 | AY731392 |
| microsatellite     | UMNe411 | 2           | R: ACATAATGCTTGGAAGAGGTGG<br>F: GATCTGGGAGAAACAATCTGAC | 175     | 2.0 | 58 | Wagner et al. 2004b   | AY464481 |
| microsatellite     | UMNe433 | 2           | R: ATTGTGTTTATTGCCATGTTGC<br>F: AACTGAGGCCAGCTGGTG     | 400     | 1.5 | 62 | Wagner et al. 2004b   | AY464485 |
| microsatellite     | UMNe449 | 2           | R: TCAGCAGCCACTGGTTTTTC<br>F: AGTAATCCAGGAGTCCTCCTCC   | 334     | 1.5 | 60 |                       |          |
| microsatellite     | UMNe488 | 2           | R: TTGAGCCACTGTGGTAAATCC<br>F: TGTTAAGCACACTTTGACCCC   | 319     | 1.5 | 60 |                       |          |
| microsatellite     | UMNe513 | 2           | R: CGACACAGTGGTAGTGGGTG<br>F: AGAATCTCACTTAGCTCCGCC    | 300     | 1.5 | 58 | Wagner et al. 2004b   | AY464512 |
| vesicle-associated | VAMP3   | 2           | R: TGGGAAATCTTACCTTTGT<br>F: TGGGAAATCTTACCTTTGT       | 114     | 1.5 | 56 |                       |          |
| membrane protein 3 | UMNe554 | 2           | R: ACTCTCTATGATAAGCTGTA<br>F: ACTCTCTATGATAAGCTGTA     | 157     | 1.5 | 62 | Wagner et al. 2004c   | AY735267 |
| microsatellite     | VHL123  | 2           | R: ATTCCCTACACAGCACTTGGC<br>F: ATTCCCTACACAGCACTTGGC   | 149-161 | 1.5 | 62 | Wagner et al. 2004c   |          |
| microsatellite     | UMNe563 | 2           | R: GATTATCTAAGTCAATATTC<br>F: GATTATCTAAGTCAATATTC     | 125     | 1.5 | 55 | Wagner et al. 2004b   | AY464529 |
|                    |         |             | R: TTCTCCATTAAACACACGCG                                |         |     |    |                       |          |

|                                                             |          |                      |                                                      |     |     |    |                           |           |
|-------------------------------------------------------------|----------|----------------------|------------------------------------------------------|-----|-----|----|---------------------------|-----------|
| WAS protein family,<br>member 2                             | WASF2    | 2                    | F: GGATTCTTGGGTGTGTTTGC<br>R: CGGAATCTTCAGGTCCTGG    | 306 | 2.0 | 58 |                           | BI961530  |
| Yip1 domain family,<br>member 1                             | YIPF1    | 2                    | F: CGGTCCGTTGGGTTCTAGTTA<br>R: CACAGAAAGCAGCATGTGAAG | 149 | 1.5 | 55 | Perrocheau<br>et al. 2006 | DX010463  |
| zinc metalloproteinase<br>(STE24 homolog, S.<br>cerevisiae) | ZMPSTE24 | <b>2p15-<br/>p16</b> | F: TTTGCAGGCTTTTACAGAATG<br>R: TTACTACGTCTCCGTGAAGC  | 185 | 1.5 | 59 |                           | AM072944  |
| zinc finger protein 330                                     | ZNF330   | 2                    | F: GGATGTTTGTGATCCAAGC<br>R: GCATCTGACTTTTATCCTGTGG  | 253 | 1.5 | 58 |                           | CX600513  |
| zinc finger, UBR1 type 1                                    | ZUBR1    | 2                    | F: ACATCGTGCACTACGACTGC<br>R: ACTTGGTGTGGCGTTCTGA    | 504 | 1.5 | 58 |                           | NM_020765 |



| Name                                         | Symbol                | Horse chr.  | Primers                                                        | Product size (bp) | MgCl <sub>2</sub> (mM) | T <sub>a</sub> | Reference               | Accession No |
|----------------------------------------------|-----------------------|-------------|----------------------------------------------------------------|-------------------|------------------------|----------------|-------------------------|--------------|
| microsatellite                               | 3CA001                | 3           | F: GGGCCTATGCATTTTTCAAT<br>R: AACTGTTGCATGGGGAATGT             | 177               | 1.5                    | 58             |                         | AY820143     |
| sequence tagged site                         | 3STS01                | 3           | F: GGCTGGACTCTTGGTCTGTC<br>R: CATGCCTGTAGTCCCAGCTA             | 290               | 1.5                    | 52             |                         | BG193780     |
| ATP-binding cassette, sub-family G, member 2 | ABCG2                 | <b>3q13</b> | F: CAGGTGGAGGCAAATCTTC<br>R: GCCACTTTATCCAGACCTAA              | 1524              | 1.5                    | TD 58          |                         | BE487863     |
| adducin 1 (alpha)                            | ADD1                  | 3q26        | F: ACTGCTTTGAGCTTCCTGGCG<br>R: GAAAGGACGTAGGACCTGTCCTCC        | 250               | 3.0                    | 58             | Lear et al. 2001*       | G62182       |
| alcohol dehydrogenase 1A, alpha polypeptide  | ADH1A ( <i>ADH3</i> ) | 3           | F: GTGCTATGCCTTGTCGTTT<br>R: CACCTGCCCAGATTCTGATT              | 204               | 2.0                    | 58             | Chowdhary et al. 2003   | AF134056     |
| alcohol dehydrogenase IB, beta polypeptide   | ADH1B                 | 3q13-q14.1  | F: GGAGTGGGCCTGTCTGTTATC<br>R: GAAAAATCCACACCTCCATTG           | 191               | 1.5                    | 55             | Perrocheau et al. 2006* | DX010429     |
| microsatellite                               | AHT022                | 3p13        | F: AAGCACAATGTGGGTTAG<br>R: TCCACGTTACACATACCTCA               | 189-197           | 2.0                    | 58             | Swinburne et al. 1997*  |              |
| microsatellite                               | AHT036                | 3p16        | F: TGCTGCCTCCAGTGTCCCT<br>R: TAGATTTACAGGCGGGTG                | 133-144           | 2.0                    | 58             | Swinburne et al. 2000*  | AJ271521     |
| microsatellite                               | AHT090                | 3           | F: ACGTTTTCCAGTTCCTGATACC<br>R: GTTCTTTGCTGTCTGGGGTC           | 109-111           | 2.0                    | 58             | Swinburne et al. 2003   | AJ507707     |
| microsatellite                               | AHT097                | 3           | F: AGTTCGGTAACCTTGCCCATG<br>R: GTTCATGGGCAGAATGGC              | 151-165           | 2.0                    | 58             | Swinburne et al. 2003   | AJ507714     |
| microsatellite                               | AHT118                | 3           | F: GATCAATAGGTGAGATGCGT<br>R: GGTCTTCTCCTGCCTTCAGA             | 283               | 1.5                    | 61             |                         |              |
| AKT interacting protein                      | AKTIP                 | <b>3p15</b> | F: CTTACTGTATTTTTATGGCAGGAGA<br>R: TTCTCTACAAAACACATTAGTCATTCA | 100               | 1.5                    | 58             |                         |              |

|                                                       |                      |                  |                                                              |         |     |    |                                            |          |
|-------------------------------------------------------|----------------------|------------------|--------------------------------------------------------------|---------|-----|----|--------------------------------------------|----------|
| albumin                                               | ALB                  | 3q14.3           | F: CGGATTCCTTGGCGGAAAGAC<br>R: GGAAGGTGAATGTTTCAGCCT         | 110     | 3.0 | 58 | Godard et al.<br>1998*                     |          |
| anaphase<br>promoting<br>complex subunit<br>4         | ANAPC4               | 3                | F: CGCTTTCCGACCTGTTTC<br>R: GCCAAGGCAATGAGATCC               | 107     | 1.5 | 59 |                                            |          |
| microsatellite                                        | ASB23                | 3q22.1-<br>q22.3 | F: GAGGTTTGTAAATTGGAATG<br>R: GAGAAGTCATTTTAAACACCT          | 129-153 | 2.0 | 55 | Irvin et al.<br>1998; Lear<br>et al. 1999* | X93537   |
| bromodomain<br>containing 7                           | BRD7                 | 3                | F: AGACCACCAGATTGCTCAGG<br>R: ATGGAAATCCCCATTGCTTT           | 431     | 1.5 | 58 |                                            | CX596327 |
| chromosome 16<br>open reading<br>frame 61             | C16orf61             | 3                | F: GCAATGTGATGCGAAAGAGA<br>R: CTGCCCAACAGACAGTCAGA           | 224     | 1.5 | 58 |                                            | DN507164 |
| C1q and tumor<br>necrosis factor<br>related protein 7 | C1QTNF7<br>(CTRP7)   | 3q25             | F: GCCAAAGATGTTTGTCTTGCT<br>R: CGTCTCTACCATCTCGTCCTG         | 209     | 1.5 | 55 | Perrocheau<br>et al. 2006*                 | DX010458 |
| core-binding<br>factor, beta<br>subunit               | CBFB                 | 3                | F: AATCTTTCATCACCCAGC<br>R: GAAAAGGGATACTGGAGC               | 162     | 2.0 | 58 | Chowdhary<br>et al. 2003                   |          |
| cyclin I                                              | CCNI                 | 3                | F: GGTGCTCACCAAAGAAACATGTAAC<br>R : CATCAGTACATGGTTCTGACCTGC | 311     | 3.0 | 58 | Chowdhary<br>et al. 2003                   |          |
| BAC end<br>sequence                                   | CH241-<br>100F24_SP6 | 3                | F: GGCTGCTTTGTAGGAATAC<br>R : CAGACAGAAGCCAGAGAC             | 261     | 1.5 | 56 |                                            | AJ542905 |
| BAC end<br>sequence                                   | CH241-<br>100F24_T7  | 3                | F: TCACTGGGCAGATTCCAC<br>R: AATGCATTTCCAGCCTGTG              | 216     | 1.5 | 56 |                                            | AJ542906 |
| cytokine induced<br>apoptosis<br>inhibitor 1          | CIAPIN1              | 3                | F: GCAAGCTCCATTCCAAG<br>R: TGGTGAGAATTCAGAGGG                | 116     | 2.0 | 55 |                                            |          |
| C-type lectin<br>domain family 3,<br>member A         | CLEC3A               | 3                | F: CCTCGGAAGTTGAAAATTGG<br>R: TTTTCCCCAAGCCTAAATTG           | 161     | 1.5 | 58 |                                            | CX600199 |
| cappuccino<br>homolog<br>(mouse)                      | CNO                  | 3                | F: CCCATTACGTTTCAGGAACTG<br>R: AGCAGGGAAAGTGGTCCTC           | 133     | 1.5 | 58 |                                            | CX605498 |

|                                                |                        |   |                                                            |         |     |       |                        |          |
|------------------------------------------------|------------------------|---|------------------------------------------------------------|---------|-----|-------|------------------------|----------|
| CCR4-NOT transcription complex, subunit 1      | CNOT1                  | 3 | F: GATGCCAGAGCAAATCAGG<br>R: GCACATTCCGTGCAAATC            | 694     | 1.5 | 63    |                        |          |
| microsatellite                                 | COR005                 | 3 | F: CAATTCCTGGCATGCTGTAAG<br>R: GATGCTCACTTCCATGAACC        | 198-200 | 2.0 | 58    | Hopman et al. 1999     | AF083448 |
| microsatellite                                 | COR028                 | 3 | F: TAAAGAGGAAGGCAATGGAC<br>R: ACCTTTTGTGCTAGGCACTG         | 227-241 | 2.0 | 58    | Murphie et al. 1999    | AF101397 |
| microsatellite                                 | COR033                 | 3 | F: CCTCCCCTACTTCCTCTCTG<br>R: CATTTTCTTTCCAGGTTCCC         | 219-243 | 2.0 | 58    | Murphie et al. 1999    | AF101402 |
| cytochrome c oxidase subunit IV isoform 1      | COX4I1                 | 3 | F: GTCCCACACACCTTTGAAGAG<br>R: AGTCCCCTTGGCAGAGAAG         | 100     | 1.5 | 58    |                        |          |
| casein kappa                                   | CSN3                   | 3 | F: TCCCGCCTATAATAATGCCA<br>R: CTTGCCATTGAGGAATTTGG         | 263     | 2.0 | 58    |                        | AF165600 |
| chemokine (C-X-C motif) ligand 6               | CXCL6                  | 3 | F: CAGATGAAGAAGCTAGGAAATAGG<br>R: GAAAGATACACCATAAGCGTCTAC | 216     | 1.5 | 58    |                        |          |
| chemokine (C-X-C motif) ligand 9               | CXCL9                  | 3 | F: AGTAATGAGGAAGGGACGCTGT<br>R: AGAAGGGCTTGGAGCAAATCTGT    | 100     | 1.5 | 58    |                        | BI961648 |
| DEAH box polypeptide 15                        | DHX15 ( <i>DDX15</i> ) | 3 | F: GACATGAGCAATTTCCCACAG<br>R: AACCAACGTGAAGAGCACAAAC      | 178     | 1.5 | 55    | Perrocheau et al. 2006 | DX010462 |
| docking protein 7                              | DOK7                   | 3 | F: ACTCTCCACCTCTGCAATGAC<br>R: CGCCCTCAAAGATGAATCC         | 127     | 1.5 | 56    |                        |          |
| family with sequence similarity 114, member A1 | FAM114A1               | 3 | F: GCCTAGCAGTGGTTCTTTACC<br>R: TCAGTAAGCGTGTCTCAGTC        | 219     | 1.5 | 58    |                        |          |
| F-box and leucine-rich repeat protein 5        | FBXL5                  | 3 | F: TAGCATACAGCTCTGCAGTT<br>R: GCAGAATCTGAAATGTCAGTT        | 1035    | 1.5 | 60    |                        |          |
| fibroblast growth factor receptor 3            | FGFR3                  | 3 | F: AGCGGATGGACAAGAAGCTG<br>R: TTCACCTCCACGTGCTTGA          | 586     | 1.5 | TD 62 |                        | AB059430 |
| fucokinase                                     | FUK                    | 3 | F: ACTGACCAAGGAACACAGC<br>R: GAAGGGAGGGGTTACGGTAG          | 389     | 1.5 | 58    |                        |          |
| GABA(A)                                        | GABARAPL2              | 3 | F: TACCGGTGCATTTGTAGCTG                                    | 202     | 1.5 | 58    |                        | DN507256 |

|                                                    |                                 |              |                                                            |        |     |       |                                          |          |
|----------------------------------------------------|---------------------------------|--------------|------------------------------------------------------------|--------|-----|-------|------------------------------------------|----------|
| receptor-associated protein-like 2                 |                                 |              | R: TACCCACCTCCCTCACTTCA                                    |        |     |       |                                          |          |
| growth arrest-specific 8                           | GAS8                            | 3            | F: CGAGAGGAGCGCAACTACTTC<br>R: TAATCTCCACCTGGTGCCTCT       | 151    | 1.5 | 55    | Perrocheau et al. 2006                   | DX010490 |
| golgi apparatus protein 1                          | GLG1                            | 3p13-p12     | F: TCATGTTAGAGCAGCAGCAGGTA<br>R: GGTTCTGGAAGTATTGGTAATTCCA | 203    | 2.0 | TD 60 | Lear et al. 2001*                        | G62189   |
| gonadotropin-releasing hormone receptor            | GNRHR                           | 3            | F: CAAACAGTGCCTCTCCTGAA<br>R: AGCTAGGGGCCTTGTGATG          | 440    | 1.5 | TD 62 |                                          | AF018072 |
| glutamic-oxaloacetic transaminase 2, mitochondrial | GOT2                            | 3p15-p14     | F: TCTCCCAGCTGGATCTCAAT<br>R: GCGTGCAGGAGAATAATGT          | 203    | 2.0 | 58    | Lear et al. 1998*; Chowdhary et al. 2003 | AF052648 |
| GrpE-like 1, mitochondrial                         | GRPEL1                          | 3            | F: GTTGCAGACATTTTGGAGAAG<br>R: CAGCTTGTACCCCACTTTGT        | 264    | 1.5 | 60    |                                          | CX595321 |
| microsatellite                                     | HMS61                           | 3p12         | F: TGCATCTGACCTAATGTGGC<br>R: CGTCAAACCATGCTGTCACG         | 200    | 3.0 | 55    | Mariat et al. 2001*                      |          |
| heterogeneous nuclear ribonucleoprotein D-like     | HNRPDL                          | 3            | F: GTCAACTTGTCACCCAATC<br>R: CTAGGCCAAGTACCAGTGT           | 170    | 3.0 | 58    | Chowdhary et al. 2003                    |          |
| haptoglobin                                        | HP                              | <b>3p13</b>  | F: CCCATCTGCCTACCTTCAAA<br>R: TACCAGGTGTCGTCCTCCTC         | 320    | 1.5 | 58    |                                          | BM780758 |
| hydroxysteroid (17-beta) dehydrogenase 11          | HSD17B11<br>( <i>LOC51170</i> ) | 3            | F: GCTCTGGCAGTCCTCGTTTCT<br>R: GCATTGAAATGTGAGGTATGTCTCAA  | 406    | 3.5 | TD 60 | Chowdhary et al. 2003                    |          |
| microsatellite                                     | HTG02                           | 3            | F: GATTGGCAACAGATGTAACTCGG<br>R: CCCCATGAGAACTAACAATGTTAG  | 99-107 | 3.0 | 58    | Ellegren et al. 1992                     | AF169163 |
| insulin-like growth factor binding protein 7       | IGFBP7                          | 3            | F: AAGGTGCCGAGCTATAAACC<br>R: ATGGATTGGATGAAAAGAAGC        | 114    | 1.5 | 58    |                                          | DN508698 |
| interleukin 8                                      | IL8                             | 3q14.2-q14.3 | F: GATCCATGAGTCCCTGTTC<br>R: GTTAATGTGCTTCCACCAG           | 117    | 1.5 | 58    | Nergadze et al. 2006*                    | BI961686 |

|                                                                 |           |          |                                                       |         |     |    |                                                 |          |
|-----------------------------------------------------------------|-----------|----------|-------------------------------------------------------|---------|-----|----|-------------------------------------------------|----------|
| lysyl-tRNA synthetase                                           | KARS      | 3p13-p12 | F: CTGTTTCCTGCCATGAAACCC<br>R: TTCTCTCCTCTGGTTGCTGACC | 223     | 3.0 | 58 | Lear et al. 2001*                               | G62187   |
| kinase insert domain receptor                                   | KDR       | 3        | F: GAATGAGGGCCCCCTGATTAT<br>R: CTGAAAACGTGGGTCTCTGA   | 493     | 1.5 | 58 |                                                 |          |
| v-kit Hardy-Zuckerman 4 feline sarcoma viral oncogene homolog   | KIT       | 3q21     | F: TTGGCATGCAGCTATTGAGT<br>R: CCTCGCATAACCTTCATCGT    | 202     | 3.0 | 58 | Lear et al. 1998*;<br>Chowdhary et al. 2003     | AF053636 |
| microsatellite                                                  | LEX007    | 3        | F: GGTAGGGCTCTGGGATGA<br>R: AACACTGGGGAAAAGTCAG       | 188-198 | 2.0 | 58 | Coogle et al. 1996                              | AF075610 |
| microsatellite                                                  | LEX057    | 3        | F: TGGTCCCCTAATCAAATCAGA<br>R: ACGGCATCCCACATAAAATAG  | 157-167 | 2.0 | 58 | Coogle & Bailey 1997                            | AF075659 |
| lipoic acid synthetase                                          | LIAS      | 3        | F: AGCCCTACAATACTGCAAAG<br>R: CTCAGCTCCTCCATCAGG      | 180     | 1.5 | 58 |                                                 |          |
| hypothetical protein FLJ20425                                   | LYAR      | 3        | F: CCCCAAAGTGAGGGAACCTT<br>R: GATATTCCACACCTGCTCCA    | ~274    | 1.5 | 54 |                                                 | DN504824 |
| mitogen-activated protein kinase kinase 1 interacting protein 1 | MAP2K1IP1 | 3        | F: TCTTATCTACTTTTGCCCTTGC<br>R: TGCAGTTCCTGGTAGGTGTTA | 100     | 2   | 50 |                                                 |          |
| membrane-bound transcription factor peptidase, site 1           | MBTPS1    | 3        | F: CATTCTGTCTTTGCCTTCC<br>R: GCTCTCTTCGGCTCTCACAG     | 191     | 1.5 | 58 |                                                 | CX596016 |
| melanocortin 1 receptor                                         | MC1R      | 3p12     | F: CAGCAGCTGGACAACATCAT<br>R: AAGCGATGAAGAGGGTGCTA    | 205     | 2.0 | 60 | Raudsepp et al. 1999*;<br>Chowdhary et al. 2003 | AF252541 |
| matrix metalloproteinase 2                                      | MMP2      | 3p15     | F: ACTCCCACTTTGATGACGAC<br>R: GAAGAGGAAAGGGAACCTTGC   | 350     | 1.5 | 58 |                                                 |          |

|                                                                                       |          |             |                                                        |         |     |       |                                                |          |
|---------------------------------------------------------------------------------------|----------|-------------|--------------------------------------------------------|---------|-----|-------|------------------------------------------------|----------|
| M-phase phosphoprotein 6                                                              | MPHOSPH6 | 3           | F: GGTGCCTCGTGAAAGTTAGC<br>R: AGCAAAGCAAAGGAGGCATAA    | 157     | 1.5 | 58    |                                                | CX601025 |
| Mof4 family associated protein 1                                                      | MRFAP1   | 3           | F: GACCAAAGGAGGAGAGAGGTA<br>R: TGAATTAGGTTGTCCAAACAGA  | 101     | 1.5 | 56    |                                                |          |
| nuclear factor of activated T-cells 5                                                 | NFAT5    | 3           | F: GGAAAACCAAAAAGGAACTGG<br>R: TTTACTGAGCCACGGCTACC    | 153     | 1.5 | 58    |                                                | CX597950 |
| microsatellite                                                                        | NVHEQ102 | 3           | F: CAACTGGGCCTCAATCTTGG<br>R: AGGGTTGGGGTCATCATCC      | 150-170 | 1.5 | 58    | Penedo et al. 2005                             |          |
| OCIA domain containing 1                                                              | OCIAD1   | 3           | F: TGGAGATACTTGGGATGAGTG<br>R: GAATATCCTTGCCCTGTAACCTT | 296     | 1.5 | 58    |                                                | CX601897 |
| protocadherin 7                                                                       | PCDH7    | 3           | F: ACTCAGGGCGTCTCTGAAGAT<br>R: GCAACAAGCCAGTCTCAACTC   | 193     | 1.5 | 55    | Perrocheau et al. 2006                         | DX010549 |
| platelet-derived growth factor receptor, alpha polypeptide phosphorylase kinase, beta | PDGFRA   | 3q21        | F: TGGCTAACAACATCTCAAACAT<br>R: CTTCAGCTCTCGGTTCTCAG   | 152     | 1.5 | 58    | Raudsepp et al. 1999*                          | CX605007 |
|                                                                                       | PHKB     | 3p16        | F: TTAGCCCAACCTCTACA<br>R: GAGTATGCCAGCTACAAT          | 399     | 3.0 | 58    | Chowdhary et al. 2003; Perrocheau et al. 2006* |          |
| peroxisome proliferator-activated receptor gamma, coactivator 1 alpha                 | PPARGC1A | <b>3q23</b> | F: AGACCAGTGAACTGAGGGACA<br>R: GATTTGGGTGGTGACACAGA    | 229     | 1.5 | 60    |                                                |          |
| protein phosphatase 3, catalytic subunit, alpha isoform                               | PPP3CA   | 3           | F: CAGCAGTTGGATGTTCTTG<br>R: AGTGCTGCGACTGTAAACG       | 349     | 1.5 | TD 62 |                                                | CD467720 |
| proteasome subunit, beta type, 10                                                     | PSMB10   | 3           | F: GAGGCGTAGACTTGACAGGA<br>R: TCCTCCAGAACTGCCAGA       | 222     | 1.5 | 58    |                                                |          |
| proteasome 26S subunit, non-                                                          | PSMD7    | 3           | F: TCCATGGTTTGAAGGGACTC<br>R: CCATTTGGTCGTTGGTCTTT     | 189     | 1.5 | 58    |                                                | CX594573 |

|                                                                        |                            |              |                                                          |         |     |          |                            |          |
|------------------------------------------------------------------------|----------------------------|--------------|----------------------------------------------------------|---------|-----|----------|----------------------------|----------|
| ATPase, 7<br>replication factor<br>C1, 145kDa                          | RFC1                       | 3            | F: CTATTTTGGGACCTGACGACT<br>R: ACATTTTCATCTGTCCAAGCC     | 772     | 1.5 | 50       |                            |          |
| ras homolog<br>gene family,<br>member H                                | RHOH                       | 3            | F: GAGCAGAAGCCAACAGAGA<br>R: GATGGAACCTCAGCATCTTCC       | 628     | 1.5 | TD<br>62 |                            | CD465079 |
| ring finger<br>protein 4                                               | RNF4                       | 3q26         | F: TTCTGAAGGAGCAGGAACTTG<br>R: GCCCTCCTCAACTCCAAGTAG     | 175     | 1.5 | 55       | Perrocheau<br>et al. 2005* | AY817482 |
| ribosomal<br>protein L13                                               | RPL13                      | 3            | F: AAGAACTCAAATTGGCCACC<br>R: TGGCCTTCTCCTTCTTG TAG      | 650     | 1.5 | 58       |                            |          |
| SEC31 homolog<br>A ( <i>S. cerevisiae</i> )                            | SEC31A                     | 3            | F: GGTACTGGAGCTGAAGGCTG<br>R: CAGGTCCTCAGAATGGTTGG       | ~1000   | 2.0 | 50       |                            | BI395133 |
| microsatellite                                                         | SGCV18                     | 3p14-<br>p13 | F: TGGGGAAGAGGGATTCAT<br>R: AAATGCCAAGCCTATCTATGC        | 157     | 1.5 | TD<br>60 | Godard et al.<br>1997*     | U90596   |
| solute carrier<br>family 2,<br>member 9                                | SLC2A9                     | <b>3q26</b>  | F: TACAATGAGTCGTGGGAGAGA<br>R: TCCAATCAGCTTCACTATTAACG   | 132     | 1.5 | 58       |                            | CX595350 |
| solute carrier<br>family 12,<br>member 4                               | SLC12A4<br>( <i>KCC1</i> ) | 3p14         | F: GCCGCGGGTACTTCACGTGGAG<br>R: GGGGCCTCCTCACACCAAGAACTG | ~400    | 3.0 | 58       | Hanzawa et<br>al. 2002*    | AF425261 |
| SPARC-like 1                                                           | SPARCL1                    | <b>3q13</b>  | F: CCAAAGCAGAAGTGGAAGAAG<br>R: TGGTGTTACCGTCATCAGTAGG    | 177     | 1.5 | 55       | Perrocheau<br>et al. 2006  | DX010589 |
| sulfotransferase<br>family 1E,<br>estrogen-<br>preferring,<br>member 1 | SULT1E1                    | 3            | F: TGACCATTCTGCATACTTTGG<br>R: GATTTGGGATAGGTGGCAAT      | 129     | 1.5 | 58       |                            |          |
| THAP domain<br>containing 6<br>microsatellite                          | THAP6                      | 3            | F: GTCTGCGGAATGTTTTAGACC<br>R: CGTTCTATGCTTTCCTGACAA     | 151     | 1.5 | 58       |                            |          |
|                                                                        | TKY353                     | 3            | F: TTCTTACTTAACAACCATCG<br>R: TGTCACCTGACAGATGAATGG      | 161-179 |     |          | Tozaki et al.<br>2001      | AB044853 |
| microsatellite                                                         | TKY427                     | 3            | F: CTGATTTCCCTTGTGGCATG<br>R: ACTAGTCAGCAGATCTGTGA       | 149     | 2.0 | 58       |                            | AB103645 |
| microsatellite                                                         | TKY434                     | 3            | F: CAAACACTTTGTTGGCCGAC<br>R: TCATCCATCAGTGTCCTG         | 194     | 2.0 | 58       |                            | AB103652 |

|                |         |                      |                                                        |         |     |    |                       |          |
|----------------|---------|----------------------|--------------------------------------------------------|---------|-----|----|-----------------------|----------|
| microsatellite | TKY447  | 3                    | F: TCGGCCTTTAAAACCTAATCC<br>R: GGAGTAAATTGGAGGCAGCA    | 198-218 | 1.5 | 58 | Tozaki et al.<br>2004 | AB103665 |
| microsatellite | TKY450  | 3                    | F: GTTCTTCCTTCCCAGCACTT<br>R: CATTGTAAGTCGGGGACCAT     | 113-119 | 1.5 | 58 | Tozaki et al.<br>2004 | AB103668 |
| microsatellite | TKY528  | 3                    | F: AGTGCCACCTCTGCTCTGTT<br>R: TCTTGCTATTGGTGCCCTTT     | 290-300 | 1.5 | 58 | Tozaki et al.<br>2004 | AB103746 |
| microsatellite | TKY569  | 3                    | F: TGGCCTGTTGTTGATCTCAG<br>R: GCAGTGGGAAAATACTTTGAGG   | 191-196 | 1.5 | 58 | Tozaki et al.<br>2004 | AB103787 |
| microsatellite | TKY590  | 3                    | F: ACGCATGCGCACTACAGATA<br>R: CACCTCTGGCATTTTGAAT      | 230-258 | 1.5 | 58 | Tozaki et al.<br>2004 | AB103808 |
| microsatellite | TKY651  | <b>3q12-<br/>q13</b> | F: CCCTCTGTACCTTCATTCCAA<br>R: CACTGCTGTTTGACCCTGTG    | 209-211 | 1.5 | 58 | Tozaki et al.<br>2004 | AB103869 |
| microsatellite | TKY780  |                      | F: AGAACCACCCCTCATTGG<br>R: GACACAGCGGACACTTGATA       | 250     | 2.0 | 58 | Tozaki et al.<br>2004 | AB103998 |
| microsatellite | TKY837  | 3                    | F: GCGACAATCTTCCTCAAGCA<br>R: GACTATTGCCACTACATGAC     | 147     | 2.0 | 58 |                       | AB104055 |
| microsatellite | TKY840  | 3                    | F: AGAATTTAGGTGAACCTGGG<br>R: GGACAATCTTCCTCAAGCAA     | 111     | 2.0 | 58 |                       | AB104058 |
| microsatellite | TKY874  | 3                    | F: GTGAATTAAATCCCCCTTCC<br>R: GCTCCAGCTCCATAGGTAAT     | 177     | 2.0 | 58 |                       | AB104092 |
| microsatellite | TKY905  | 3                    | F: TGTTCAAGGAACAGAGAAGG<br>R: ACATGTCAAAGGACATGGAC     | 202     | 2.0 | 58 |                       | AB104123 |
| microsatellite | TKY910  | 3                    | F: ATAAACCACATTTAGGGGCA<br>R: AAGGAGAACCCAGTCAGTC      | 229     | 2.0 | 58 | Tozaki et al.<br>2004 | AB104128 |
| microsatellite | TKY937  | 3                    | F: TCCTGCGGAAATACATTAGG<br>R: AGTTCAAAGTGGTCCCATAG     | 146     | 2.0 | 58 | Tozaki et al.<br>2004 | AB104155 |
| microsatellite | TKY990  | 3                    | F: GATCAGACATGGTCTCTTTTG<br>R: TGCCCTCCTATAGGACTTC     | 220     | 2.0 | 58 |                       | AB104208 |
| microsatellite | TKY1037 | 3                    | F: ACTGTTAAATGAATTGTCAAGTGG<br>R: GGCCTCATAACATACTTTGG | 176     | 2.0 | 58 |                       | AB104255 |
| microsatellite | TKY1082 | 3                    | F: GAATCTAAGCTTGCCCTTTC<br>R: CTGAACCTCGAACTTTAAGGTG   | 125     | 2.0 | 58 |                       | AB104300 |



|                                                   |          |      |                                                           |         |     |    |                                    |          |
|---------------------------------------------------|----------|------|-----------------------------------------------------------|---------|-----|----|------------------------------------|----------|
| microsatellite                                    | TKY1085  | 3    | F: ACCAAACTCAAGGTTAAGCTC<br>R: TGAAGTCTACCTTCAAGTGG       | 189     | 2.0 | 58 |                                    | AB104303 |
| microsatellite                                    | TKY1129  | 3    | F: CTAGCAATTCCTTTCTGGGA<br>R: ACATGCTCACTTAACCACTG        | 241     | 2.0 | 58 |                                    | AB104347 |
| microsatellite                                    | TKY1146  | 3    | F: TGCTCCAAGACACCAATTTG<br>R: CGCGTGAAGTAAACCACTCG        | 356     | 2.0 | 58 |                                    | AB104364 |
| microsatellite                                    | TKY1150  | 3    | F: TGGCCTTTGGACATTACATG<br>R: TGGCTGTCATCGCCATTG          | 185     | 2.0 | 58 |                                    | AB104368 |
| microsatellite                                    | TKY1154  | 3    | F: GAGTCACAGACCATCAGATG<br>R: ATAAGTGTGATGTCCCTGAG        | 167     | 2.0 | 58 |                                    | AB104372 |
| microsatellite                                    | TKY1174  | 3    | F: AAGAGTTGAGGGTTCAGAAC<br>R: CAGGGTGCCTAATGACAAG         | 96      | 2.0 | 58 |                                    | AB104392 |
| microsatellite                                    | TKY1323  | 3    | F: TCATTTCTACCTCCTTGGAG<br>R: GACTGAGTCCCAAAGCAAAG        | 195     | 1.5 | 58 | Tozaki et al.<br>2007              | AB215266 |
| microsatellite                                    | TKY1918  | 3    | F: TGAAAGTTACGTAGCAGAGG<br>R: GCCTTGTAAGTCTGCTAAG         | 196     | 1.5 | 60 | Tozaki et al.<br>2007              | AB215861 |
| microsatellite                                    | TKY2482  | 3    | F: CAGATTTCTTCCACCCTGAA<br>R: ATGGTGCATAATGAGGAGGA        | 270     | 1.5 | 58 | Tozaki et al.<br>2007              | AB216425 |
| microsatellite                                    | TKY2924  | 3    | F: TAGCCTTTGCTAAGCCTGAA<br>R: GGGAAAGGTGCTCTGTTGTTA       | 205     | 1.5 | 60 | Tozaki et al.<br>2007              | AB216867 |
| microsatellite                                    | TKY3084  | 3    | F: CTATTGGACCCAGTGACCTG<br>R: TGACATCACCTCTTCCAAGG        | 250     | 1.5 | 58 | Tozaki et al.<br>2007              | AB217027 |
| microsatellite                                    | UCDEQ437 | 3    | F: CTGTTCTGGGCAGGCTTCTCTA<br>R: TTGCTGGCTTGGCTGGTC        | 167-191 | 2.0 | 58 | Eggleston-<br>Stott et al.<br>1997 | U67408   |
| ubiquitin<br>carboxyl-<br>terminal esterase<br>L1 | UCHL1    | 3q22 | F: GCTTCCCTACTTGTTAGAACACAGC<br>R: CAATTAAACCACATCCAAGGCC | 187     | 2.0 | 58 | Lear et al.<br>2001*               | G62176   |
| microsatellite                                    | UMNe068  | 3    | F: AATTTCAAAGTCCAGCTCTTGC<br>R: GGGCCCAAGAATAAAGAAGG      | 121-133 |     |    | Roberts et<br>al. 2000             | AF191701 |
| microsatellite                                    | UMNe082  | 3    | F: GAATCCAGCAATCTCTAAAGCTG<br>R: ATGGGCACAGATGTTAGCTCAG   | ~180    | 1.5 | 58 |                                    |          |

|                |         |   |                                                         |      |     |    |                       |          |
|----------------|---------|---|---------------------------------------------------------|------|-----|----|-----------------------|----------|
| microsatellite | UMNe113 | 3 | F: GATCTCATTGAAGTATTCTTACCAC<br>R: CATCCATGAAACCATCACCA | 136  | 1.5 | 62 |                       |          |
| microsatellite | UMNe158 | 3 | F: AATTGAGAGCCAAGATGACACC<br>R: GGCACCATTTGAGGAAGATG    | 146  | 1.5 | 60 | Wagner et al. 2004a   | AY391305 |
| microsatellite | UMNe175 | 3 | F: GCATAACGTCAGCCATGTTG<br>R: AAGCAACCCAAGTGTCCATC      | 153  | 2.0 | 58 | Mickelson et al. 2003 | AF536274 |
| microsatellite | UMNe178 | 3 | F: TGGCAGATAAAGCCCTTACC<br>R: GATCACATAGTGAAGGTGTTAAACG | 107  | 2.0 | 58 | Wagner et al. 2004a   | AY391312 |
| microsatellite | UMNe182 | 3 | F: TCTCTGCATTTCACTTCTCGG<br>R: TGAGAGAAGAGCCCAGGAAG     | 132  | 2.0 | 58 | Wagner et al. 2004a   | AY391315 |
| microsatellite | UMNe231 | 3 | F: TAGTCGTTGTCCACCAGCTG<br>R: GATGGAATGACACAGCACATG     | 230  | 2.0 | 58 | Mickelson et al. 2003 | AF536304 |
| microsatellite | UMNe251 | 3 | F: CTGGTTCCCTTACAGGACACTCC<br>R: ATTATCCATGTGACCCGTCTG  | 370  | 1.5 | 55 |                       |          |
| microsatellite | UMNe311 | 3 | F: GATATCCTACACCGAGGACTGC<br>R: TCGTTCTTTGCTGTCTGGG     | 179  | 2.0 | 58 | Mickelson et al. 2004 | AY731384 |
| microsatellite | UMNe317 | 3 | F: CAAGAACAGACCTCTTCCGC<br>R: GCGGTTACCAGACATGGG        | 161  | 2.0 | 58 |                       |          |
| microsatellite | UMNe439 | 3 | F: TGCAGTCTGTCCATGTAGCTG<br>R: AATTGTCAAACTGTGGACGG     | 330  | 1.5 | 58 |                       |          |
| microsatellite | UMNe516 | 3 | F: TCCAGAAACTCTACTCTTAGGG<br>R: TGCCTTCATTCAACATTATG    | 306  | 1.5 | 58 |                       |          |
| microsatellite | UMNe527 | 3 | F: GCAAACGTAGTGTACTTGTGCC<br>R: TCTCATCCACAGCACCAAAG    | 209  | 1.5 | 62 | Wagner et al. 2004c   | AY735261 |
| microsatellite | UMNe529 | 3 | F: TTTCCCCACAGATGGCTAAG<br>R: AGAGCAGCAACACCTGGG        | 286  | 1.5 | 58 |                       |          |
| microsatellite | UMNe538 | 3 | F: GAAGGGCAGAGAAGCAAATG<br>R: AGCCCTTTGGTGATTACAC       | ~350 | 1.5 | 58 | Wagner et al. 2004b   | AY464521 |
| microsatellite | UMNe541 | 3 | F: AGGCAGCGAGCTAACTCTTG<br>R: CAGATGCTCTGTCTGTCCTCC     | 216  | 1.5 | 58 |                       |          |
| microsatellite | UMNe557 | 3 | F: TCAACAAAGTGAAACATCTTTG<br>R: TAACAGCATTTGTCAAGAGAGC  | 152  | 1.5 | 55 |                       |          |

|                                                     |         |   |                                                               |      |     |    |                           |          |
|-----------------------------------------------------|---------|---|---------------------------------------------------------------|------|-----|----|---------------------------|----------|
| microsatellite                                      | UMNe576 | 3 | F: CCACTGCAGTGTACAATAGAGC<br>R: ATGCTTCATTGCTGTGAACTG         | ~300 | 1.5 | 58 |                           |          |
| microsatellite                                      | UMNe600 | 3 | F: GAGCAGTGGTGCAGAATTTAC<br>R: TAGAAGAATGCATGGCTCATAC         | 148  | 1.5 | 50 | Wagner et al. 2004c       | AY735292 |
| Vac14 homolog (S. cerevisiae)                       | VAC14   | 3 | F: CCTGCAGCTGCTAGATGTGA<br>R: GTGGGAGAGCAGCTGGAA              | 103  | 2   | 55 |                           |          |
| microsatellite                                      | VHL063  | 3 | F: GCTTTTAAAATGGTATGAATCTCCA<br>R: AAAGAAGGAATCAGGCAAACACTCTA |      |     |    | van Haeringen et al. 1998 |          |
| vacuolar protein sorting 35 homolog (S. cerevisiae) | VPS35   | 3 | F: TGATGCGGTCACAATTCAGG<br>R: ACACATCGCAGGTGCAGAATG           | 320  | 2.0 | 58 |                           | BI961559 |
| WD repeat domain 1                                  | WDR1    | 3 | F: GTCACCATGCAAAGATCGTC<br>R: TGGATCTTGACCCTGGTCTC            | 124  | 1.5 | 55 | Perrocheau et al. 2006    | DX010610 |
| YTH domain containing 1                             | YTHDC1  | 3 | F: CAGATCTGCAAGGAGTGTTATC<br>R: ACCTCCCAGCATTTTAGCAT          | 233  | 1.5 | 60 |                           |          |

| Name                                         | Symbol | Horse chr. | Primers                                                | Product size (bp) | MgCl <sub>2</sub> (mM) | T <sub>a</sub> | Reference              | Accession No |
|----------------------------------------------|--------|------------|--------------------------------------------------------|-------------------|------------------------|----------------|------------------------|--------------|
| ATP-binding cassette, sub-family F, member 2 | ABCF2  | 4          | F: CTGTGGGCAGTGCATGGC<br>R: TCACGAGGATGGTAGGGC         | 96                | 1.5                    | 52             |                        |              |
| aryl hydrocarbon receptor                    | AHR    | 4          | F: GGATGCATGGATATTGTGTTTC<br>R: TTGTCTACCCGCATCTGAAC   | 102               | 1.5                    | 58             |                        |              |
| microsatellite                               | AHT006 | 4          | F: GAAGATGTCCGCTTTGATAT<br>R: CACTGGCACATCCAGATTTG     | 121-131           | 1.5                    | 56             | Binns et al. 1995      |              |
| microsatellite                               | AHT009 | 4          | F: TAACCATGTCCCTGCAATGA<br>R: TCAGAACTGTCCTTGTGAAAGC   | 186-190           | 1.5                    | 54             | Swinburne et al. 2005  |              |
| microsatellite                               | AHT013 | 4          | F: CTTCTCAGGTGCATAGGTTG<br>R: TCATTAAAAATAACAACCTGCCCC | 142-146           | 2.0                    | 58             | Swinburne et al. 1997  |              |
| microsatellite                               | AHT042 | 4          | F: CATTTCGCATTTTCAGTTCAGG<br>R: AAACCCACTCACCTATCACCC  | 87-99             | 3.0                    | 58             | Swinburne et al. 2000  | AJ271527     |
| microsatellite                               | AHT043 | 4          | F: ACACAAGTGACAGGAGCGTG<br>R: TGGAAGCATGCAAGAGGTC      | 168-186           | 3.0                    | 58             | Swinburne et al. 2000  | AJ271528     |
| microsatellite                               | AHT061 | 4          | F: TCTGCATCCTCATGTTCAATG<br>R: TTGACTTATTTCACTCAGCCCA  | 226-234           | 2.0                    | 58             | Swinburne et al. 2003  | AJ507678     |
| microsatellite                               | AHT084 | 4          | F: TGGCAATCTGCAGGGAAC<br>R: GATCTTGTGATTGTGTGTGTG      | 87-171            | 2.0                    | 58             | Swinburne et al. 2003  | AJ507701     |
| microsatellite                               | AHT108 | 4          | F: ATCTCTGGGCTTCAGAGG<br>R: ACTGGCCATCTGAAGGCAT        | 326-337           | 1.5                    | 58             | Swinburne et al. 2003  |              |
| A kinase anchor protein 9                    | AKAP9  | 4          | F: GTAAATACCTGAGGGCAGAAAG<br>R: ACTCTGACAGCAGACCGAAAC  | 205               | 1.5                    | 58             |                        |              |
| ankyrin repeat and MYND domain containing 2  | ANKMY2 | 4          | F: TAGAAAACAAAGGGGCAAGG<br>R: CAGGAAGAGCCACATGAAAG     | 506               | 1.5                    | 58             | Dierks et al. 2006     | CX596863     |
| ankyrin repeat domain 7                      | ANKRD7 | 4          | F: CCATGATCTTCATTCCCTCTG<br>R: AGACTCACTGCTGGGAGCAC    | 98                | 1.5                    | 58             | Dierks et al. 2006     | CT006390     |
| anillin, actin binding protein               | ANLN   | 4          | F: CAATTGTACAGTCGGCAGAT<br>R: ACACAGAGTGTGTCCCTGCAT    | 141               | 1.5                    | 55             | Perrocheau et al. 2006 | DX010431     |
| acyloxyacyl hydrolase (neutrophil)           | AOAH   | 4          | F: CTGTTGGCAGATGTCTTCT<br>R: GGTCTCCAAACACCTTTTC       | 327               | 1.5                    | 58             | Dierks et al. 2006     | BI961651     |
| ADP-ribosylation factor 5                    | ARF5   | 4          | F: TGGGGTGAAAGGCAGGAAG<br>R: TTACCTGACCCGAATTCAAAAC    | 105               | 1.5                    | 52             |                        |              |
| ADP-ribosylation factor-                     | ARL4A  | 4          | F: TCGACAGCAGTTTGTAGCAG                                | 495               | 1.5                    | 58             | Dierks et al.          | AJ584157     |

|                                                                          |                          |              |                                                           |         |     |    |                        |          |
|--------------------------------------------------------------------------|--------------------------|--------------|-----------------------------------------------------------|---------|-----|----|------------------------|----------|
| like 4A                                                                  |                          |              | R: TCACTTCCACTCAGGAGGAG                                   |         |     |    | 2006                   |          |
| microsatellite                                                           | ASB03                    | 4p12-<br>p13 | F: AATTCATCTCAGTGTCTACCAGC<br>R: TTCATTTTCTACATGCACTACAGC | 197     | 2.0 | 58 | Breen et al.<br>1997*  | X95318   |
| microsatellite                                                           | ASB22                    | 4q21         | F: GAGGAATGTGAAATACAGGAGG<br>R: TTTGTGGTCTTCCGTGCACC      | 159     | 3.0 | 58 | Breen et al.<br>1997*  | X93536   |
| microsatellite                                                           | ASB29                    | 4            | F: CTGGCCCATAAAAAAACAACACTG<br>R: TGTATGGTTGTCAGCTCAAACC  | 123-135 | 2.0 | 58 | Breen et al.<br>unpub. | X93543   |
| ATPase, H <sup>+</sup> transporting,<br>lysosomal 14kDa, V1<br>subunit F | ATP6V1F                  | 4            | F:CTAAACCGGGATGACATTGG<br>R: AGTCCCCTAACGCAGGTCTT         | 201     | 1.5 | 58 |                        |          |
| Bardet-Biedl syndrome 9                                                  | BBS9<br>( <i>PTHB1</i> ) | 4q21.3       | F: AGCCAAGCTACATTCTGCTG<br>R: ATCACTTGAACGTGGAGGAG        | 170     | 1.5 | 60 | Dierks et al.<br>2006* | AM072941 |
| BMP binding endothelial<br>regulator                                     | BMPER                    | 4            | F: CTGAATCTTGAGGGTGGAG<br>R: AGTCGAGTGGCAGGTCTGAA         | 155     | 1.5 | 52 |                        |          |
| 2,3-bisphosphoglycerate<br>mutase                                        | BPGM                     | 4            | F: GGGCTTAGTCAGTGTCTCAG<br>R: GGGCCTCTGGTCTTAACTATC       | 260     | 1.5 | 62 |                        | BI961532 |
| chromosome 7 open<br>reading frame 10                                    | C7orf10                  | 4            | F: CCAGTTCGCCCAGGAGTAG<br>R: TGGGATGACAGCAGGTTACA         | 134     | 1.5 | 51 |                        |          |
| chromosome 7 open<br>reading frame 23                                    | C7orf23                  | 4            | F: TGTGACAAGGATACAACACTGGAG<br>R: ACCCCTAAAGGGAAACTGTTC   | 320     | 1.5 | 58 | Dierks et al.<br>2006  | CX598762 |
| calcium channel, voltage-<br>dependent, alpha 2/delta<br>subunit 1       | CACNA2D1                 | <b>4q12</b>  | F: AACTAAAAGACCAACACCA<br>R: GACCCACATTCCCTACTAC          | 147     | 1.5 | 56 |                        |          |
| Ca <sup>2+</sup> -dependent activator<br>protein for secretion 2         | CADPS2                   | 4            | F: TGCTCATTTTCATGTGCTTCC<br>R: CGTGCATAACCGTAGAGCTG       | 335     | 1.5 | 58 | Dierks et al.<br>2006  | AJ542841 |
| caldesmon 1                                                              | CALD1                    | 4            | F:GAATGACAGGCATCTCCACA<br>R: TAAGCAGGAGCACAGCAAGA         | 244     | 1.5 | 58 |                        |          |
| capping protein (actin<br>filament) muscle Z-line,<br>alpha 2            | CAPZA2                   | 4            | F: CTTTGTGATATTCGCCCAGTTC<br>R: AGCATTAGACCTTGGCCTTG      | 252     | 1.5 | 58 | Dierks et al.<br>2006  | CX596422 |
| chromobox homolog 3<br>(HP1 gamma homolog,<br><i>Drosophila</i> )        | CBX3                     | 4            | F: AACCAAGAGGATTTGCCAGA<br>R: CTGGACAAGAATGCCAAGTT        | 500     | 1.5 | 54 |                        |          |
| coiled-coil domain<br>containing 132                                     | CCDC132                  | 4            | F: CAGCCTACTGACCCTCAAGC<br>R: TGCAGCTTGTTGTTGTTTCA        | 1200    | 1.5 | 58 |                        |          |
| cell division cycle 2-like 5                                             | CDC2L5                   | 4            | F: AGCAACTAAGGCTGCTGAGG<br>R: GTTCCACCACTTGAGGGAGA        | 168     | 1.5 | 53 |                        |          |

|                                                         |                 |      |                                                              |         |     |    |                                                 |          |
|---------------------------------------------------------|-----------------|------|--------------------------------------------------------------|---------|-----|----|-------------------------------------------------|----------|
| cystic fibrosis transmembrane conductance regulator     | CFTR            | 4q22 | F: CCATGGTTGGAAAGCTGATT<br>R: GGGTTCTTCGAATGATTGTT           | 163     | 2.0 | 58 | Shubitowski et al. 2001;<br>Mariat et al. 2001* | AY008775 |
| BAC end sequence                                        | CH241-100K23_T7 | 4    | F: CTGTTTCATCCTCGGGAGTAG<br>R: TTTGGTTGATTTAAGTTTCAGG        | 496     | 1.5 | 57 | Dierks et al. 2006                              | AJ543097 |
| BAC end sequence                                        | CH241-100O5_SP6 | 4    | F: TCACCATTTGAGGGAGAGAG<br>R: CCTTAGCAAACCTCAAAGC            | 377     | 1.5 | 58 | Dierks et al. 2006                              | AJ543269 |
| BAC end sequence                                        | CH241-112H8_SP6 | 4    | F: TCTTGGTTCCAAAAATCCACA<br>R: TTATGGCAGCTCTTGCACTG          | 201     | 1.5 | 63 |                                                 | CR955466 |
| coiled-coil-helix-coiled-coil-helix domain containing 3 | CHCHD3          | 4    | F: GGCCCAAATTCTCCAGTGT<br>R: CTGTTTGGCCTGATTGACG             | 100     | 1.5 | 58 |                                                 |          |
| chloride channel 1, skeletal muscle                     | CLCN1           | 4q26 | F: GGTGGCCACGATGGACATCC<br>R: ACTAGCCCAGGATTTCTGGGACTC       | 120     | 2.0 | 58 | Mariat et al. 2001*                             |          |
| cordon-bleu homolog (mouse)                             | COBL            | 4    | F: TCAGAAACCCAACAGCCTTT<br>R: CTTAGGGGGACCAGGCTTAA           | 120     | 1.5 | 54 |                                                 |          |
| collagen, type I, alpha 2                               | COL1A2          | 4    | F: GAAGAATGTTGATGGTGCTAGAAG<br>R: ACCATGGGAAAGGATGAAAAC      | 205     | 3.0 | 58 | Chowdhary et al. 2003                           | G62185   |
| microsatellite                                          | COR047          | 4    | F: GAGACAAGCAGAAGCTCAGG<br>R: CGGACTGTCTGAGGAACTG            | 249-253 | 2.0 | 55 | Ruth et al. 1999                                | AF108364 |
| microsatellite                                          | COR057          | 4    | F: GGAGGAGAGGAAGAGAGTGG<br>R: ATCCAGGGCTCTCCATAGTC           | 227-243 | 2.0 | 55 | Ruth et al. 1999                                | AF108374 |
| microsatellite                                          | COR089          | 4    | F: CCTGCCATAAATTTGTTTCC<br>R: TCCCTACCTCATCTCCACAC           | 272-290 | 2.0 | 58 | Tallmadge et al. 1999b                          | AF154942 |
| carboxypeptidase, vitellogenic-like                     | CPVL            | 4    | F: TGACCAGAGTTACTACGGGAAG<br>R: TAATTATTCATGATTTTCAGTTAACCAC | 164     | 1.5 | 58 | Dierks et al. 2006                              | DN511041 |
| cAMP responsive element binding protein 5               | CREB5           | 4    | F: CCAGCTCACCCTCACAGAA<br>R: CTGGAGAAAAGCACCAAAGC            | 278     | 1.5 | 54 |                                                 |          |
| cytochrome P450, family 51, subfamily A, polypeptide 1  | CYP51A1         | 4    | F: ACCTAATCCGGTAGGTGACAC<br>R: AGTTGCTAAGCCCATGCCAG          | 223     | 1.5 | 50 |                                                 |          |
| DEAD (Asp-Glu-Ala-Asp) box polypeptide 56               | DDX56           | 4    | F: CAACCTTCCTATCCCCCAATC<br>R: CCCTACAGCAGCAACCTTTC          | 207     | 1.5 | 58 |                                                 |          |
| dihydrolipoamide dehydrogenase                          | DLD             | 4    | F: CCCACTGATGATAAAAACAC<br>R: AGAATGAAAAACAAAGCACC           | 265     | 1.5 | 56 |                                                 |          |
| DnaJ (Hsp40) homolog,                                   | DNAJB6          | 4    | F: CCTTTGGTTCACTGGGTCAT                                      | 750-800 | 1.5 | 55 | Dierks et al.                                   |          |

|                         |          |                |                            |     |     |    |                          |          |
|-------------------------|----------|----------------|----------------------------|-----|-----|----|--------------------------|----------|
| subfamily B, member 6   |          |                | R: CTCTTCTTTGACCATTCTCGAC  |     |     |    | 2006                     |          |
| DnaJ (Hsp40) homolog,   | DNAJB9   | 4              | F: TGATACCACCAATCAGCACAC   | 442 | 1.5 | 58 | Dierks et al.            | CX600182 |
| subfamily B, member 9   |          |                | R: GGCAAATTCAATCTTTTCTTGG  |     |     |    | 2006                     |          |
| epidermal growth factor | EGFR     | <b>4p11-12</b> | F: AAAGCACCCCTTCAGAAGAAC   | 246 | 1.5 | 58 |                          |          |
| receptor                |          |                | R: TAGCAGATCCAGACCATTCC    |     |     |    |                          |          |
| engrailed homolog 2     | EN2      | 4q27           | F: GAACCCCAACAAAGAGGACA    | 147 | 2.0 | 58 | Caetano et al.           | AF134060 |
|                         |          |                | R: TGAGACTCGTTGAGGCTGAG    |     |     |    | 1999; Lear et al. 2001*  |          |
| hypothetical protein    | FLJ20323 | 4q13           | F: TGTCTGCATGCACGTGTAAAT   | 191 | 1.5 | 55 | Perrocheau et al. 2005*  | AY817468 |
| FLJ20323                |          |                | R: TTTTCCCATTACAGGAAAAGTCA |     |     |    |                          |          |
| hypothetical protein    | FLJ22374 | 4              | F: TTGGGTCTCTGGCTTACACC    | 185 | 1.5 | 58 | Dierks et al.            | CR957559 |
| FLJ22374                |          |                | R: CTACCTGCTCCCTGGACATC    |     |     |    | 2006                     |          |
| filamin C, gamma        | FLNC     | 4              | F: GCTTTACCTAACACACCGTTC   | 223 | 1.5 | 52 |                          |          |
|                         |          |                | R: ACATGCATCCAACTAATCCTTC  |     |     |    |                          |          |
| forkhead box P2         | FOXP2    | 4              | F: TTGACGGAGTAAAAGGGATTG   | 463 | 1.5 | 58 | Dierks et al.            | AJ885834 |
|                         |          |                | R: TGAATGCTCAAAATGCAAGC    |     |     |    | 2006                     |          |
| glycyl-tRNA synthetase  | GARS     | 4              | F: GGCAGAAATCGAGCACTTTG    | 99  | 1.5 | 58 | Dierks et al.            | CX594065 |
|                         |          |                | R: TGGGCTTTTGCTGAATACAAG   |     |     |    | 2006                     |          |
| glucokinase             | GCK      | 4p14-p13       | F: GTACCCCTGGCCCTTCTTAG    | 201 | 2.0 | 58 | Shubitowski et al. 2001; | AY008787 |
|                         |          |                | R: CTAGATCAGGCTGGGTGTCC    |     |     |    | Chowdhary et al. 2003*   |          |
| GTPase, IMAP family     | GIMAP4   | 4              | F: GGACAAGAATGTTTGGTG      | 142 | 1.5 | 62 |                          | BI961493 |
| member 4                |          |                | R: CTCAAGCTGTGGGGTTATG     |     |     |    |                          |          |
| GLI-Kruppel family      | GLI3     | 4              | F: GGAAGGGAAATGAGAAATGGAG  | 241 | 1.5 | 58 |                          |          |
| member GLI3             |          |                | R: TGCACAGTCCAACGTGATAG    |     |     |    |                          |          |
| G protein-coupled       | GPR37    | 4              | F: CCTCCTCTTCTGTCTCTGCAA   | 199 | 1.5 | 55 | Perrocheau et al. 2006   | DX010498 |
| receptor 37             |          |                | R: GCAATGAGTTCCAACAGAAGC   |     |     |    |                          |          |
| glutamate receptor,     | GRM3     | 4              | F: GGCCTGTTTCTTATTAACGAA   | 154 | 1.5 | 50 |                          |          |
| metabotropic 3          |          |                | R: GAACACCAACTTCACTCCTG    |     |     |    |                          |          |
| HMG-box transcription   | HBP1     | 4              | F: GAGTTGGCCTTTCCTTGACC    | 407 | 1.5 | 58 | Dierks et al.            | CX596143 |
| factor 1                |          |                | R: TGCAAGTGTTGCACTGTCAC    |     |     |    | 2006                     |          |
| HERPUD family member    | HERPUD2  | 4              | F: ATGATGGGCAAAATGCAAAC    | 580 | 1.5 | 58 | Dierks et al.            | CX597132 |
| 2                       |          |                | R: TTAATCCAGGCCTTTGAAGC    |     |     |    | 2006                     |          |
| 3-hydroxyisobutyrate    | HIBADH   | 4q21.1-21.3    | F: GTTAGGGCTTGACCCAAAACCTC | 101 | 1.5 | 58 | Dierks et al.            |          |
| dehydrogenase           |          |                | R: CATCCATCACCCAGGTACAG    |     |     |    | 2006*                    |          |
| microsatellite          | HMS09    | 4              | F: GCAACAGATATTAGCTCAGGGCC | 107 | 2.0 | 58 | Godard et al.            | U89805   |

|                                                                         |          |                  |                                                                                          |         |     |    |                                                       |          |
|-------------------------------------------------------------------------|----------|------------------|------------------------------------------------------------------------------------------|---------|-----|----|-------------------------------------------------------|----------|
| microsatellite                                                          | HMS19    | 4q21             | R: TGCTGTTCTTTTGCTGTGAAGGG<br>F: CTAACCAGCACAGAATGAATGGC<br>R: TAAAAGAACAGTGGAGAGTAAAGTG | 86      | 4.0 | 58 | 1997<br>Godard et al.<br>1997; Godard<br>et al. 1998* | U89808   |
| microsatellite                                                          | HMS56    | 4                | F: CAACCCCAATACCACCTCTGCC<br>R: CCGGGAGTGCAGTGGGAGAC                                     | 123-150 | 2.0 | 58 | Chowdhary et<br>al. 2003                              |          |
| microsatellite                                                          | HTG01    | 4                | F: TTTAATGATTCTTTACTCCAGATT<br>R: TGCTAAGCAATGGAATGATGGGTG                               | 200     | 2.0 | 52 | Ellegren et al.<br>1992                               | AF169162 |
| microsatellite                                                          | HTG07    | 4                | F: CCTGAAGCAGAACATCCCTCCTTG<br>R: ATAAAGTGTCTGGGCAGAGCTGCT                               | 124     | 3.0 | 58 | Marklund et<br>al. 1994                               | AF169291 |
| microsatellite                                                          | HTG09    | 4q21.3           | F: TGTGGGAAGAGTGTCAATAGCTGT<br>R: AGGCATCTGGTTTGCTGCAATTTC                               | 130     | 2.0 | 58 | Marklund et<br>al. 1994;<br>Godard et al.<br>1998*    | AF169293 |
| microsatellite                                                          | HTG22    | 4                | F: TACTACATTTTCATCCTCCACAT<br>R: GGAGAACTTCCCAGAGAGCA                                    | 150     | 2.0 | 58 | Lindgren 2000                                         |          |
| insulin-like growth factor<br>2 mRNA binding protein<br>3               | IGF2BP3  | 4q21.1-<br>q21.3 | F: ACCAGCGTGTCTTTCATTTTC<br>R: AGAAATTCACACCAGGTTGC                                      | 198     | 1.5 | 58 | Dierks et al.<br>2006*                                | AM072950 |
| insulin-like growth factor<br>binding protein 1                         | IGFBP1   | <b>4p12</b>      | F: GAGCAGCTCCTGGACAGTTT<br>R: CCACTTTTGTATGTCGGAGA                                       | 123     | 3.0 | 58 |                                                       |          |
| interleukin 6                                                           | IL6      | 4q14-<br>q21.1   | F: TTGAGGTAAGCCTACACTTTCC<br>R: TGGGCACAGAACTTATGTTG                                     | ~200    | 1.5 | 61 | Musilova et al.<br>2005*                              |          |
| inhibitor of growth<br>family, member 3                                 | ING3     | 4                | F: AAGAGGGACGAAGAACATCAAG<br>R: TGACGAACTGGCATTCTGTG                                     | 158     | 1.5 | 58 | Dierks et al.<br>2006                                 | CD464595 |
| inhibin, beta A                                                         | INHBA    | 4                | F: GCTACCACGCCAACTACTG<br>R: CAAGCGGTATTGGTTGATG                                         | 104     | 1.5 | 58 |                                                       | BI961669 |
| integrin, beta 8                                                        | ITGB8    | 4                | F: CATCCATGTGCTGTCTTTGAC<br>R: ATCAAGAGCGAGATGAGACG                                      | 900     | 1.5 | 54 |                                                       |          |
| kelch repeat and BTB<br>domain containing 2                             | KBTBD2   | 4                | F: ATGACAAGGGAATTCAGTGC<br>R: GCCTAGATACGCTAACC GAAC                                     | 516     | 1.5 | 58 | Dierks et al.<br>2006                                 | CT008293 |
| potassium voltage-gated<br>channel, Shal-related<br>subfamily, member 2 | KCND2    | 4                | F: TTGTCCTTCAAAATGACTCCTC<br>R: TGGCTGTATGTGTGTGCAAG                                     | 159     | 1.5 | 58 | Dierks et al.<br>2006                                 | CT007157 |
| KIAA0895 protein                                                        | KIAA0895 | 4                | F: TTGGAGTAACTTTCCCTTGC<br>R: TTTGAAAAACAGTCTGCGTTC                                      | 504     | 1.5 | 57 | Dierks et al.<br>2006                                 | AJ543064 |
| laminin, beta 1                                                         | LAMB1    | <b>4p13-12</b>   | F: GCACCCACAGCAGTTACAG                                                                   | 420     | 1.5 | 58 | Dierks et al.                                         | DN872515 |



|                                                                        |                         |                |                                                           |         |     |    |                             |          |
|------------------------------------------------------------------------|-------------------------|----------------|-----------------------------------------------------------|---------|-----|----|-----------------------------|----------|
| leptin (obesity homolog, mouse)                                        | LEP                     | 4              | R: ATCTGGGCCTTCTCTGCTTC<br>F: TGGGAAGGACAGGAAGACAG        | 199     | 2.0 | 58 | 2006<br>Caetano et al. 1999 | AF097583 |
| microsatellite                                                         | LEX033                  | 4              | R: AGAGCAAGAGCTCAGCAAGG<br>F: TTTAATCAAAGGATTCAAGTTG      | 182-197 | 3.0 | 55 | Coogle et al. 1996          | AF075635 |
| microsatellite                                                         | LEX050                  | 4              | R: TTTCTCTTCAGGTGTCCTC<br>F: ATAGTCTGGGGTTAGGTAAGG        | 112-126 | 2.0 | 58 | Coogle et al. 1997          | AF075652 |
| microsatellite                                                         | LEX061                  | 4              | R: TCTAGCCCAATGTAAATGC<br>F: TCAGTGTTCCCATCTGTA           | 148-166 | 3.0 | 55 | Coogle & Bailey 1997        | AF075661 |
| limb region 1 homolog (mouse)                                          | LMBR1 ( <i>C7orf2</i> ) | 4q27           | R: TGAAATCACACCTTTACTTTA<br>F: TTGACCTGCTTGAGACTTTG       | 141     | 1.5 | 55 | Perrocheau et al. 2005*     | AY817456 |
| LSM8 homolog, U6 small nuclear RNA associated ( <i>S. cerevisiae</i> ) | LSM8                    | 4q22           | R: TGAAAAGCTCTTCTCGCACAG<br>F: TCCACAAAGAGACTCACAACAG     | 532     | 1.5 | 58 | Dierks et al. 2006*         | AJ583991 |
| membrane associated guanylate kinase, WW and PDZ domain containing 2   | MAGI2                   | <b>4p15-13</b> | R: AGCCATGATTTTAATTTGGTTC<br>F: TGAATACGCAACCTACACCAAC    | 147     | 1.5 | 54 |                             |          |
| MyoD family inhibitor domain containing                                | MDFIC                   | 4              | R: CTGATGATGACAAAGCCGAAG<br>F: TATATGGCCATCACGACTGC       | 403     | 1.5 | 58 | Dierks et al. 2006          | CX594432 |
| mesenchyme homeobox 2                                                  | MEOX2                   | 4              | R: ACAAAGCTTGCAATTTTGACC<br>F: CAGGCTCTGCAAACCAACTG       | 151     | 1.5 | 53 |                             |          |
| mesoderm specific transcript homolog (mouse)                           | MEST                    | 4              | R: AGCCCAAGCTGGAAGAGTT<br>F: ACTTCAGTGCTTAGAAGCGTGTCC     | 169     | 3.0 | 58 | Chowdhary et al. 2003       |          |
| myeloid/lymphoid or mixed-lineage leukemia 3                           | MLL3                    | <b>4q27</b>    | R: GTACAGGAATTGCTAAGCTACATGAGG<br>F: TTCACATAGTACAGCCCAGG | 164     | 1.5 | 54 |                             |          |
| membrane protein, palmitoylated 6                                      | MPP6                    | 4              | R: TGACAGGAACATACATGGAAAG<br>F: ACGATTACCTCCATCAAGC       | 1000    | 1.5 | 51 |                             |          |
| myotrophin                                                             | MTPN                    | 4              | R: CTCCCACATGAAGCAGACCT<br>F: GCAATTGCAGTGTTTTTGCAT       | 214     | 2.0 | 53 | Chowdhary et al. 2003       |          |
| myosin IG                                                              | MYO1G                   | 4              | R: TTCTGATGTACATGAACCAGGAT<br>F: CTACGTCCGCTGCATCAAG      | 158     | 1.5 | 54 |                             |          |
| N-acyl-phosphatidylethanolamine-hydrolyzing phospholipase D            | NAPE-PLD                | 4              | R: TGAGCAGGAATCGAGAGTAGG<br>F: TGGATAAAGACCCACCTTGC       | 508     | 1.5 | 58 | Dierks et al. 2006          | CX605596 |
|                                                                        |                         |                | R: TTCCATAGGAAGTCACAAATCC                                 |         |     |    |                             |          |

|                                                                                              |                          |                    |                                                            |        |     |    |                         |          |
|----------------------------------------------------------------------------------------------|--------------------------|--------------------|------------------------------------------------------------|--------|-----|----|-------------------------|----------|
| NADH dehydrogenase (ubiquinone) 1 alpha subcomplex, 4                                        | NDUFA4                   | 4                  | F: CAGCAAACCTGAAGAAAGAAGGTC<br>R: CGTGCATTTAGAGGGGGAAT     | 135    | 1.5 | 54 |                         |          |
| neurogenic differentiation 6                                                                 | NEUROD6                  | 4                  | F: GGGCATGGGACTCTTGATAA<br>R: GCCAATTACTCAGCCCACAA         | 438    | 1.5 | 54 |                         |          |
| nucleotide-binding oligomerization domain containing 1                                       | NOD1                     | 4                  | F: TGTTGTCCAAAGCCAAACAG<br>R: ACGCCGTAGTCGTTGAGATT         | 376    | 1.5 | 54 |                         |          |
| nitric oxide synthase 3                                                                      | NOS3                     | 4q26-27            | F: CCATCAGGAGATGGTCAACTATG<br>R: TGGCCACTTCCTTAAAGGTCT     | 240    | 1.5 | 58 | Perrocheau et al. 2006* |          |
| neuropeptide Y                                                                               | NPY                      | <b>4q21.1-21.3</b> | F: AAGCGACTGGGGTTGTCC<br>R: GTGTCGCAGCGCTGAGTAGT           | 150    | 1.5 | 58 |                         |          |
| microsatellite                                                                               | NVHEQ029                 | <b>4p14-16</b>     | F: GAGATTTTGCCCCAAAGGTTA<br>R: CTCTTCTTTCTTCCCCAGGTCT      | 91-113 | 2.0 | 58 | Røed et al. 1998        | AF056393 |
| neurexophilin 1                                                                              | NXPH1                    | 4                  | F: CTCGGGATGAAGGTGAACAT<br>R: GCTGACTGGGCAGAAATTACA        | 187    | 1.5 | 54 |                         |          |
| poly (ADP-ribose) polymerase family, member 12                                               | PARP12                   | 4                  | F: ACTCCTCCATCACTGTATCTC<br>R: GCCCAGAAACCATTAGGAATTG      | 151    | 1.5 | 56 |                         |          |
| piccolo (presynaptic cytomatrix protein)                                                     | PCLO                     | 4                  | F: GTGGATACAAGCGTCCAAACT<br>R: TGAAGTCTATGCTGGAGACT        | 155    | 1.5 | 50 |                         |          |
| phosphoglycerate mutase 2                                                                    | PGAM2                    | <b>4p12-13</b>     | F: CAAGGACGCAAAGATGGAAT<br>R: GTGGTGGGATGTCAAAGGAG         | 236    | 1.5 | 55 |                         |          |
| PHD finger protein 14                                                                        | PHF14                    | 4                  | F: AGAACCCGAGGACGAAAAC<br>R: GCAAGTTGCACATTCCGTTC          | 260    | 1.5 | 58 | Dierks et al. 2006      | CX594630 |
| pleckstrin homology domain containing, family A (phosphoinositide binding specific) member 8 | PLEKHA8 ( <i>FAPP2</i> ) | 4q21.3-q22         | F: CCAACAAGGCAAAGTTTACCAC<br>R: TCAGCCACAAGAGGGCTTC        | 105    | 1.5 | 55 | Perrocheau et al. 2006* | DX010473 |
| polymerase (DNA directed), mu                                                                | POLM                     | 4                  | F: TTCTGCAAGGCAAGGAGGGGC<br>R: TCGCACCCACCCCTGGAGTT        | 122    | 1.5 | 60 |                         |          |
| paraoxonase 1                                                                                | PON1                     | <b>4q13-14</b>     | F: GGTGAACCATCCAGATTTTAAG<br>R: GGCAGAAGTTTGTGTCTGATG      | 102    | 1.5 | 55 |                         |          |
| paraoxonase 2                                                                                | PON2                     | <b>4q13-14</b>     | F: ATGGTATCAGCACTTTCATAGACA<br>R: AAGCTCATGTTTGATTGTTTTAGA | 678    | 1.5 | 55 |                         |          |
| protein phosphatase 1,                                                                       | PPP1R3A                  | 4                  | F: TCCAGGTGCGAGAAGAGTTT                                    | 267    | 1.5 | 55 |                         |          |

|                                                                                                 |                  |                |                                                                 |     |     |    |                          |           |
|-------------------------------------------------------------------------------------------------|------------------|----------------|-----------------------------------------------------------------|-----|-----|----|--------------------------|-----------|
| regulatory (inhibitor)<br>subunit 3A                                                            |                  |                | R: CGAATAACGCCCTTCACACT                                         |     |     |    |                          |           |
| protein kinase, AMP-<br>activated, gamma 2 non-<br>catalytic subunit                            | PRKAG2           | 4q26-<br>q27   | F: ATGACAACATGAGCAGAAGAG<br>R: CCACCCCCAACCTATTAAATC            | 460 | 1.5 | 60 | Dranchak et al.<br>2006* |           |
| proteasome (prosome,<br>macropain) 26S subunit,<br>ATPase, 2                                    | PSMC2            | <b>4p15-13</b> | F: TTCAGAGGACCCGAAGTACA<br>R: ATCTTAGGAGGCAGCGGAAT              | 630 | 1.5 | 55 |                          |           |
| protein tyrosine<br>phosphatase, non-receptor<br>type 12                                        | PTPN12           | 4              | F: TCTGCATGGTCTAAATCTTTGTGTAC<br>R: AACACACACAAGCTAAGAGAATTCAAC | 271 | 1.5 | 58 | Chowdhary et<br>al. 2003 |           |
| scinderin                                                                                       | SCIN             | 4              | F: TGTCTGAAACTGCCACAAA<br>R: GTAAAGCCGAGGTGGATGGT               | 500 | 1.5 | 54 |                          |           |
| sema domain,<br>immunoglobulin domain<br>(Ig), short basic domain,<br>secreted, (semaphorin) 3C | SEMA3C           | 4p16           | F: ACTCCTTCTTGAACGTAAGAGCC<br>R: CCTCACACGGAGTGAACATTCA         | 249 | 2.0 | 58 | Chowdhary et<br>al. 2003 | G62198    |
| microsatellite                                                                                  | SGCV23           | 4q27           | F: GGCTTAAGATATGGGTGAGTAAGG<br>R: GCCCACCTCTTACTTTTCTCAA        | 218 | 3.0 | 58 | Godard et al.<br>1997*   | U90601    |
| src kinase associated<br>phosphoprotein 2                                                       | SKAP2<br>(SCAP2) | 4              | F: TTTGCCAACTGATGACCAAC<br>R: GCAAATAATCAAGCAAAATGC             | 474 | 1.5 | 58 | Dierks et al.<br>2006    | CD528759  |
| solute carrier family 25,<br>member 13                                                          | SLC25A13         | 4              | F: TTTTAGGGGTCAGCAGCTTG<br>R: TCTCCCTTTCCCCATCTTTC              | 525 | 1.5 | 58 | Dierks et al.<br>2006    | AJ543018  |
| sorting nexin 13                                                                                | SNX13            | 4q14           | F: TCCATTATTATCCTGGTGGAAG<br>R: GTGATCCCAAACACAACATTC           | 365 | 1.5 | 61 | Dierks et al.<br>2006*   | AM072955  |
| sclerostin domain<br>containing 1                                                               | SOSTDC1          | 4              | F: CTGGATTGGAGGAGGCTATG<br>R: TCTCTGTGATGCTGGACTGG              | 243 | 1.5 | 59 |                          |           |
| sorcin                                                                                          | SRI              | 4              | F: AGGTAAAGTCCCCAGGCTGT<br>R: GGAAATTCACAACACCTTGCT             | 800 | 1.5 | 55 |                          |           |
| SFRS protein kinase 2                                                                           | SRPK2            | 4              | F: ACACGGCATTAAAGACCAACC<br>R: GTGCTCAGAAACCACACAG              | 526 | 1.5 | 58 | Dierks et al.<br>2006    | AJ885367  |
| six transmembrane<br>epithelial antigen of the<br>prostate 1                                    | STEAP1,2         | 4              | F: AAAAGTGATTTGCAGCCTGG<br>R: AGGATAGGCAGTCAAGCTAC              | 115 | 1.5 | 58 |                          |           |
| T-box 20                                                                                        | TBX20            | 4              | F: TGTGGAGAAGTCGTCCTGTG<br>R: CCCAGCTCATGGAATTTGTC              | 215 | 1.5 | 54 |                          |           |
| T cell receptor gamma                                                                           | TRG@             | 4p15-          | F: AGCTCCATAAGGCTGGAACA                                         | 176 | 2.0 | 58 | Caetano et al.           | AF134235, |

|                           |        |     |                                                         |         |     |    |                         |          |
|---------------------------|--------|-----|---------------------------------------------------------|---------|-----|----|-------------------------|----------|
| locus                     | (TCRG) | p14 | R: TGACTTTCCAGTCACGGTCA                                 |         |     |    | 1999; Lear et al. 2001* | L38392   |
| testis derived transcript | TES    | 4   | F: AAGTGCCACGAATTGTCTCC<br>R: TTTTCGGCCAATTTGTTCTC      | 200     | 1.5 | 58 | Dierks et al. 2006      | CX597165 |
| transcription factor EC   | TFEC   | 4   | F: TCCAAAGAGAGCAGTAGGAGAAG<br>R: CACCGACATAGAATTGCTTCC  | 106     | 1.5 | 55 | Perrocheau et al. 2006  | DX010594 |
| microsatellite            | TKY210 | 4   | F: CGGAAATGACCAGTTTGCTT<br>R: AGGTTGCCACGGGATTAAGT      | 240-280 | 1.5 | 53 | Swinburne et al. 2000   |          |
| microsatellite            | TKY223 | 4   | F: GCAAGAAATCAACGCAAAAG<br>R: CCGATTCAAGTAGTTCAGGGATG   | 170     | 1.5 | 53 |                         |          |
| microsatellite            | TKY300 | 4   | F: CAGTTGTTATCATGAGGGTG<br>R: AGTGACAAGAGCTCAAAGTG      | 150     | 1.5 | 50 | Tozaki et al. 2000c     | AB034609 |
| microsatellite            | TKY337 | 4   | F: AGCAGGGTTTAATTACCGAG<br>R: TAGATGCTAATGCAGCACAG      | 200     | 1.5 | 53 | Tozaki et al. 2001      | AB044838 |
| microsatellite            | TKY354 | 4   | F: AGTGAGGTCTTCCTTGACTG<br>R: TGTTAGATGGTGGTAAGTGC      | 156-188 | 1.5 | 58 | Tozaki et al. 2001      | AB044854 |
| microsatellite            | TKY363 | 4   | F: CTCAGACTAAGCGGTACTAG<br>R: ATGGATACATTCTGGGGAAC      | 184-192 | 1.5 | 52 | Tozaki et al. 2001      | AB044863 |
| microsatellite            | TKY375 | 4   | F: ACCAAGAGGAAAAGCACTTG<br>R: CTATAAGGAAGGCGGGAAAAG     | 170     | 1.5 | 50 | Tozaki et al. 2001      | AB044875 |
| microsatellite            | TKY430 | 4   | F: TTTTGGTTAGGCCTCTGTAC<br>R: CCCACTCTCCTATAAACAGT      | 156     | 2.0 | 58 |                         | AB103648 |
| microsatellite            | TKY552 | 4   | F: CTAGAGGTGCCTTCCCAGAC<br>R: ACCACCAAGACGAAAGGTGA      | 148-156 | 1.5 | 58 | Tozaki et al. 2004      | AB103770 |
| microsatellite            | TKY586 | 4   | F: GCAGATTTCTCCCCACTCC<br>R: TTATGTGGGGCTGAGAAAGG       | 100-105 | 1.5 | 53 | Tozaki et al. 2004      | AB103804 |
| microsatellite            | TKY639 | 4   | F: TGCTAAGAACTTGCAGTAGA<br>R: TGGTATATCACATAGCCAGT      | 208     | 1.5 | 56 |                         | AB103857 |
| microsatellite            | TKY661 | 4   | F: CGAGGTCTTGGAACCTATCC<br>R: TTCACTTCAGACAACCTATTGAAGA | 150     | 1.5 | 53 | Tozaki et al. 2004      | AB103879 |
| microsatellite            | TKY720 | 4   | F: CAGGAGTATCCAGAATTGCAGA<br>R: CCAGCTGTGTGTAACGCAAT    | 220     | 1.5 | 53 | Tozaki et al. 2004      | AB103938 |
| microsatellite            | TKY772 | 4   | F: ATCAATAGAGAACGAGCAGC<br>R: TGAAGCAGTGACAGAATGCC      | 142     | 2.0 | 58 |                         | AB103990 |
| microsatellite            | TKY797 | 4   | F: CACCCCAATCGATGTCTGAAG<br>R: CCATGCTGTGGTGGCATC       | 148     | 2.0 | 58 | Tozaki et al. 2004      | AB104015 |
| microsatellite            | TKY810 | 4   | F: CCACCTACGATGGGTTCAT                                  | 259     | 2.0 | 58 | Tozaki et al.           | AB104028 |

|                |         |   |                                                                                 |     |     |    |                       |          |
|----------------|---------|---|---------------------------------------------------------------------------------|-----|-----|----|-----------------------|----------|
| microsatellite | TKY818  | 4 | R: CCAAGAGCACTGATACAGAG<br>F: GCAACAGATGTTAGCTCAGG<br>R: TATGGTGCATCATTTTGAGACT | 99  | 2.0 | 58 | 2004                  | AB104036 |
| microsatellite | TKY820  | 4 | F: ATCGCAGGTAAGGTACAGAC<br>R: GCTGACTCTCCCCAAAGAAT                              | 167 | 2.0 | 58 |                       | AB104038 |
| microsatellite | TKY830  | 4 | F: ATTGGAATGTCAGGTGTAGC<br>R: AGGCAGGCCAGTTTGATTG                               | 143 | 2.0 | 58 | Tozaki et al.<br>2004 | AB104048 |
| microsatellite | TKY833  | 4 | F: TTTTGGTTCGAGTCCTTGGA<br>R: GGGAAGTGGTTGTAGACAAG                              | 149 | 1.5 | 62 | Tozaki et al.<br>2004 | AB104051 |
| microsatellite | TKY922  | 4 | F: CCACTTTGTTGAACCCGTTT<br>R: TGCAGACTACACAAGCTTTTC                             | 120 | 2.0 | 58 |                       | AB104140 |
| microsatellite | TKY935  | 4 | F: TCCTACAATACTCTTCTCGC<br>R: AGTCGGACTTAGTGTTTGTC                              | 201 | 2.0 | 58 |                       | AB104153 |
| microsatellite | TKY942  | 4 | F: GAAGGGACCTTGTCAGAAG<br>R: TGACTGGAGCAGTGTGAAG                                | 212 | 2.0 | 58 |                       | AB104160 |
| microsatellite | TKY953  | 4 | F: CCTAGGATGGTGAATGTAAC<br>R: GGGCCAGACAATCAAGTTC                               | 209 | 2.0 | 58 |                       | AB104171 |
| microsatellite | TKY958  | 4 | F: ATCTCAACTCCAAGTCTCAG<br>R: TTCCTGAGAAACAACAGCTC                              | 222 | 2.0 | 58 |                       | AB104176 |
| microsatellite | TKY977  | 4 | F: ATCTACCCAGTCTCCTATAAG<br>R: ATTTCTTGTCTCCACTTTGAAG                           | 119 | 2.0 | 58 |                       | AB104195 |
| microsatellite | TKY1030 | 4 | F: AAGTAGGGAACCGTAAAGAG<br>R: TGAGTCCTCAGAAAACTAAGC                             | 93  | 2.0 | 58 |                       | AB104248 |
| microsatellite | TKY1044 | 4 | F: GTATGCCTCTGTGATGCTC<br>R: ACAGCTTCAAGTCCTTGAAAC                              | 162 | 2.0 | 58 |                       | AB104262 |
| microsatellite | TKY1059 | 4 | F: TGGGGGTAATAAGTACAGTG<br>R: AGCAACAGATGTTAGCTCAG                              | 87  | 2.0 | 58 |                       | AB104277 |
| microsatellite | TKY1063 | 4 | F: TGAGAATACCACAGTGCAAC<br>R: ACAACAGATGTTAGCTCAGG                              | 232 | 2.0 | 58 |                       | AB104281 |
| microsatellite | TKY1079 | 4 | F: TTCTCATACCTGTTTCAGGTG<br>R: TAGAATGGAGAAGGGGAATC                             | 166 | 2.0 | 58 |                       | AB104297 |
| microsatellite | TKY1089 | 4 | F: CTTCTGTTGATTTGGGTTGAG<br>R: GGGACTTTACTGGACAGTG                              | 243 | 2.0 | 58 |                       | AB104307 |
| microsatellite | TKY1099 | 4 | F: TGCAAAATGGAGGAAGACTG<br>R: AAATCTGGGTACTGAGGTTG                              | 193 | 2.0 | 58 |                       | AB104317 |
| microsatellite | TKY1110 | 4 | F: AAGTTCATGTTGGACACTGC<br>R: AGCATGAACTGAAGTCCATC                              | 162 | 1.5 | 58 |                       | AB104328 |

|                                      |         |   |                                                           |         |     |    |                          |          |
|--------------------------------------|---------|---|-----------------------------------------------------------|---------|-----|----|--------------------------|----------|
| microsatellite                       | TKY1717 | 4 | F: CAGAATCCTATCGTGACTTC<br>R: AATGGATGGAACATATGAGC        | 281     | 1.5 | 58 | Tozaki et al.<br>2007    | AB215660 |
| microsatellite                       | TKY2101 | 4 | F: AGTCATGGAATTTTCCGTGC<br>R: AAGGGGTGCTGTAAATAATG        | 176     | 1.5 | 58 | Tozaki et al.<br>2007    | AB216044 |
| microsatellite                       | TKY2805 | 4 | F: GCGCCAACTGTAGTTTGAAT<br>R: CGAAAATGTTTCTGGCAAAT        | 601     | 1.5 | 60 | Tozaki et al.<br>2007    | AB216748 |
| microsatellite                       | TKY2982 | 4 | F: CCGATGTTAGAATCAACAGGA<br>R: TTGGGTTGTGATTTCTGTCA       | 278     | 1.5 | 58 | Tozaki et al.<br>2007    | AB216925 |
| microsatellite                       | TKY3083 | 4 | F: TGGCAGTTTTTTGCTGATAC<br>R: GGGCTAGACAAATGCTGAA         | 99      | 1.5 | 58 | Tozaki et al.<br>2007    | AB217026 |
| T cell receptor gamma<br>variable 10 | TRGV10  | 4 | F: TCACTGCTGGAAGCATTAC<br>R: CCACCATCCAGCACAGTAG          | 450     | 1.5 | 58 | Dierks et al.<br>2006    | CD535783 |
| microsatellite                       | UMNe054 | 4 | F: AACTCACTTCTTCCTGCTCG<br>R: CCAAGGCTCTTTGCCAAGAC        | 107-127 | 2.0 | 58 | Roberts et al.<br>2000   | AF191691 |
| microsatellite                       | UMNe063 | 4 | F: GGATTTTCTTCTTTTGAATGGC<br>R: TTTACAATAGCCAAGATGCGG     | 128-142 | 2.0 | 58 | Roberts et al.<br>2000   | AF191696 |
| microsatellite                       | UMNe101 | 4 | F: CATTTTAATCAACATTTTCCATCTG<br>R: GCAATGCAGTGAGATGATGC   | 100     | 1.5 | 60 | Mickelson et<br>al. 2003 | AF536247 |
| microsatellite                       | UMNe104 | 4 | F: TGATTTTTGTTCAGCCTCTATGC<br>R: CCTAGAAAGGTGGGAAATAAATTG | 156     | 1.5 | 60 | Wagner et al.<br>2004a   | AY391291 |
| microsatellite                       | UMNe110 | 4 | F: TCTTTCCTACCCTCCATGACC<br>R: GATCTAGTACAACACTCCGTGTG    | 141     | 1.5 | 58 | Wagner et al.<br>2004a   | AY391293 |
| microsatellite                       | UMNe112 | 4 | F: TGCCCAAATATTGAGCAAGG<br>R: TCTCTCCTCCCCTTTTGTG         | 155     | 1.5 | 55 | Wagner et al.<br>2004a   | AY391294 |
| microsatellite                       | UMNe138 | 4 | F: AGCTGGAAAGGACCACTTT<br>R: AACCAACAGGGGGTTTCC           | 148     | 1.5 | 58 | Mickelson et<br>al. 2003 | AF536259 |
| microsatellite                       | UMNe172 | 4 | F: CCAGACACAGACCTAGCACC<br>R: CCAGCAAAGGAGGAGGAAG         | 190     | 2.0 | 58 | Wagner et al.<br>2004a   | AY391310 |
| microsatellite                       | UMNe174 | 4 | F: TCTGCATCCTCATGTTCAATG<br>R: TCGAAAATGGCAAGATTTCC       | 184     | 2.0 | 62 | Wagner et al.<br>2004c   | AY735237 |
| microsatellite                       | UMNe192 | 4 | F: TAAGCCTGTCCATCCCTGTC<br>R: TCAAAGAGCATCTCACGGG         | 164     | 2.0 | 58 | Mickelson et<br>al. 2003 | AF536280 |
| microsatellite                       | UMNe199 | 4 | F: TCCAGCAAATGGTAAGGTAGTG<br>R: GATCTCTCTCCACCCTATACCA    | 124     | 2.0 | 58 | Mickelson et<br>al. 2003 | AF536284 |
| microsatellite                       | UMNe224 | 4 | F: ATGCTTAGCAAGGCCGTG<br>R: TCCAAAGATAGCGGCAGTG           | 152     | 2.0 | 58 | Mickelson et<br>al. 2003 | AF536301 |
| microsatellite                       | UMNe249 | 4 | F: CAAGAGAAGGAAGCTGGGG                                    | 124     | 1.5 | 58 | Mickelson et             | AF536317 |

|                                                     |                               |   |                                                         |     |     |       |                                 |          |
|-----------------------------------------------------|-------------------------------|---|---------------------------------------------------------|-----|-----|-------|---------------------------------|----------|
| microsatellite                                      | UMNe256                       | 4 | R: AAAAATGTGAAATGTGCCTTCC<br>F: GGCCACACGACTACTTTCAC    | 142 | 2.0 | 58    | al. 2003<br>Wagner et al. 2004a | AY391329 |
| microsatellite                                      | UMNe377                       | 4 | R: ACTTCTGGAAGACAGCTGGC<br>F: CAGACATGGCACCCTTG         | 240 | 1.5 | 58-62 | Wagner et al. 2004b             | AY464468 |
| microsatellite                                      | UMNe404                       | 4 | R: AGGATATTGTGTTTCCCTCAGG<br>F: TTGGAACCTTTTAGCAAAGAACC | 166 | 2.0 | 55    | Wagner et al. 2004c             | AY735245 |
| microsatellite                                      | UMNe544                       | 4 | R: GATCCATTCCCACATATGGC<br>F: GCCAGGTGTCCCACGTAC        | 189 | 1.5 | 58    | Mickelson et al. 2004           | AY731411 |
| microsatellite                                      | UMNe551                       | 4 | R: CTGGACCAGCCTCACTCTTC<br>F: GATCTAGTGAGGGTTGGAGGG     | 215 | 1.5 | 62    | Wagner et al. 2004c             | AY735266 |
| microsatellite                                      | UMNe561                       | 4 | R: AACCCAGAAAGACACGTTCTG<br>F: ATGCCAAAGCAGAAAAAGATG    | 162 | 1.5 | 58    |                                 |          |
| microsatellite                                      | UMNe587                       | 4 | R: TCTTCACCTCAGCCCGTC<br>F: TTGGTCAGAATAGGTAGTTATG      | 254 | 1.5 | 58    | Wagner et al. 2004              | AY735285 |
| microsatellite                                      | VHL057                        | 4 | R: AGATGGATATGTACATGGATAC<br>F: GGCTCCTAAACATCCAGCAG    | 105 | 1.5 | 62    | van Haeringen et al. 1998       |          |
| microsatellite                                      | VHL088                        | 4 | R: GTGAGGCTCCAAGTACCTCT<br>F: CCACCTTCACAATTATCAGTGAC   | 120 | 1.5 | 62    | van Haeringen et al. 1998       |          |
| vacuolar protein sorting 41 homolog (S. cerevisiae) | VPS41 ( <i>CH241-103G20</i> ) | 4 | R: TGGTCCTCATCATCTAGTTCCT<br>F: CCCACATTTACCTCATCAGC    | 391 | 1.5 | 58    | Dierks et al. 2006              | AJ618811 |
| Wiskott-Aldrich syndrome-like                       | WASL                          | 4 | R: AGTTTTGAGTTCCAGTTTCCAG<br>F: ACCTGCAAGATGTGGCTTG     | 302 | 1.5 | 55    |                                 |          |
| zinc finger, C3HC-type containing 1                 | ZC3HC1                        | 4 | R: CCAGACTCATCCACACCAGA<br>F: CATGCAGCTCTCCCTGATAA      | 197 | 1.5 | 58    |                                 |          |
|                                                     |                               |   | R: GGCTCCGAGTCATCATCCT                                  |     |     |       |                                 |          |

| Name                                                      | Symbol           | Horse chr. | Primers                                                 | Product size (bp) | MgCl <sub>2</sub> (mM) | T <sub>a</sub> | Reference              | Accession No |
|-----------------------------------------------------------|------------------|------------|---------------------------------------------------------|-------------------|------------------------|----------------|------------------------|--------------|
| microsatellite                                            | 5CA001           | 5          | F: GCTGATGCAGTGC GTTGTAA<br>R: CCCTCCATAGACAGCATTGG     | 215-217           | 1.5                    | 58             | Penedo et al. 2005     |              |
| sequence tagged site                                      | 5STS01           | 5          | F: TTTCCAAGTGGTGGTAGGC<br>R: CACGGTCTTGTTCTCCACT        | 107               |                        |                |                        |              |
| sequence tagged site                                      | 5STS02           | 5          | F: GCCCTAAGACAGCAGATTGG<br>R: GTGAGGAGGGAGGTTGACT       | 1161              | 1.5                    | 60             |                        | CX595941     |
| sequence tagged site                                      | 5STS03<br>(DIA1) | 5q17       | F: TGTCGGCCAGCACATCTACC<br>R: CCTCCAGCGGGAACTTGGG       | 180               | 1.5                    | 65             | Mariat et al. 2001*    |              |
| acyl-Coenzyme A dehydrogenase, C-4 to C-12 straight chain | ACADM            | 5          | F: GCCTGGGAAC TTGTTTAATG<br>R: CCCTGTACATCCATAAGCCAAT   | 719               | 1.5                    | 58             |                        | NM_000016    |
| adenosine A3 receptor                                     | ADORA3           | 5          | F: CCAATTCCGTTCTGTTGTGA<br>R: GCCAGGACAAAGCAAACAAG      | 241               | 2.0                    | 58             |                        | AY011243     |
| amylo-1, 6-glucosidase, 4-alpha-glucanotransferase        | AGL              | 5          | F: CGATTAGGCCCAACTTTACAG<br>R: TGATTATCAGCACCAACACG     | 803               | 1.5                    | 58             |                        | NM_000646    |
| microsatellite                                            | AHT024           | 5p16       | F: TCCACTAATATCCCTCCACCC<br>R: CTGTACCGCATGTGCAGC       | 197-199           | 2.0                    | 65             | Swinburne et al. 2000* | AJ272106     |
| microsatellite                                            | AHT050           | 5          | F: GTTGGCTGGTTTTTGCATTT<br>R: CGTACACACATTTTCACCCA      | 299-305           | 1.5                    | 58             |                        | AJ507667     |
| microsatellite                                            | AHT066           | 5          | F: ATCCATTTTCACCAAGTGTGG<br>R: GTTTGTCTCCAAGCTCAGGC     | 277-281           | 1.5                    | 58             | Swinburne et al. 2003  | AJ507683     |
| microsatellite                                            | AHT068           | 5          | F: GGGAGGAAACCCAGTCAATT<br>R: GGTCCCTCATCACTTCCACA      | 296-308           | 1.5                    | 58             |                        | AJ507685     |
| microsatellite                                            | AHT107           | 5          | F: ATCTAACCAGAGCGCAACGT<br>R: CCCGACACAGAAGATGGG        | 133-178           | 1.5                    | 58             | Swinburne et al. 2003  | AJ507724     |
| adenosine monophosphate deaminase 1                       | AMPD1            | 5q12-q13   | F: CATCATGGTGCTCAACAACC<br>R: TTTTAAATTCAGGCCATGAGAGA   | 900               | 1.5                    | 58             |                        |              |
| anterior pharynx defective 1 homolog A (C. elegans)       | APH1A            | 5          | F: CTGACTCCTCTAGTGGAATG<br>R: CTCGTGTCTGGGCTCATATCT     | 209               | 2.0                    | 58             |                        | BI961757     |
| apolipoprotein A-II                                       | APOA2            | 5p15-p14   | F: GAGCTTTGGTTCGGAGACAG<br>R: TGTCAGCTGCTCCTTTGACTT     | 586               | 1.5                    | 56             |                        |              |
| microsatellite                                            | ASB10            | 5          | F: GTTGTCTAGGTGCAGAATCTGG<br>R: GTTATGTCTCCCCTTTCTCTACC | 146               | 1.5                    | 58             | Breen et al. 1997      | X95325       |
| activating transcription factor                           | ATF3             | 5          | F: TCCTCATCGAATCCTCCTTTT                                | 203               | 1.5                    | 55             |                        | DX010613     |



|                                                                               |                 |                 |                             |     |     |    |                         |                    |
|-------------------------------------------------------------------------------|-----------------|-----------------|-----------------------------|-----|-----|----|-------------------------|--------------------|
| 3                                                                             |                 |                 | R: AGCCTTAAATCCTGGAGTGGA    |     |     |    | et al. 2006             |                    |
| ATPase, Na <sup>+</sup> /K <sup>+</sup> transporting, alpha 2 (+) polypeptide | ATP1A2          | <b>5p13-p12</b> | F: CTGCCATCTCCTTGGCCTAT     | 352 | 1.5 | 60 |                         |                    |
| ATPase, Na <sup>+</sup> /K <sup>+</sup> transporting, beta 1 polypeptide      | ATP1B1          | <b>5p18</b>     | R: AGGTGAAGAAGCCACCCAGT     |     |     |    |                         |                    |
| breast carcinoma amplified sequence 2                                         | BCAS2           | 5               | F: CATGCTGGTGCTGTGTCTTT     | 300 | 1.5 | 58 |                         |                    |
| B-cell CLL/lymphoma 9                                                         | BCL9            | 5p12            | R: TCCATTGTTTTAACCTGACTGAA  |     |     |    |                         |                    |
| brix domain containing 5                                                      | BXDC5           | <b>5q14-q15</b> | F: CTGGGTATCCCTGGTCAGTAA    | 105 | 1.5 | 55 | Perrocheau et al. 2006  | DX010437           |
| chromosome 1 open reading frame 43                                            | C1orf43         | 5               | R: TCTTTGTTTGCTTCTCCGTGT    |     |     |    |                         |                    |
| complement component 4 binding protein, alpha                                 | C4BPA           | 5               | F: GATCAACATGCCCCATTCTCT    | 193 | 1.5 | 55 | Perrocheau et al. 2006* | DX010439           |
| complement component 4 binding protein, beta                                  | C4BPB           | 5               | R: GTCTGGGATTTTTGGCACAT     |     |     |    |                         |                    |
| calcylin binding protein                                                      | CACYBP (SIP)    | 5p17-p16        | F: CTCAATTTATTGGAAGGCAG     | 346 | 1.5 | 58 |                         | NM_025065          |
| calsequestrin 1                                                               | CASQ1           | 5p13-p12        | R: GAATCAAAGGTCCCTTTCTG     |     |     |    |                         |                    |
| calsequestrin 2                                                               | CASQ2           | 5               | F: ATCCCTGTTCTTAATGGGC      | 123 | 1.5 | 58 |                         | NM_138740          |
| CD2 molecule                                                                  | CD2             | 5q11            | R: CTGTCTCATAGCCATCCAGC     |     |     |    |                         |                    |
| cell division cycle 7 homolog (S. cerevisiae)                                 | CDC7            | 5               | F: GTATCAGAGGCCAACAAAAGAG   | 126 | 1.5 | 58 |                         | CX597654           |
| cadherin, EGF LAG seven-pass G-type receptor 2 (Drosophila)                   | CELSR2          | 5               | R: CACCTGAAATCTTCCTGACAA    |     |     |    |                         |                    |
| BAC end sequence                                                              | CH241-100A3_SP6 | 5               | F: CCTGTGCTGGTGAATGGTGAAT   | 118 | 2.0 | 58 |                         | BI961786           |
| BAC end sequence                                                              | CH241-101I11_T7 | 5               | R: CTAGGCACTGGCTCCAATTGCT   |     |     |    |                         |                    |
| BAC end sequence                                                              | CH241-101P7_T7  | 5               | F: GGGTGGAAATCAAGAGAGAAGC   | 196 | 1.5 | 55 | Perrocheau et al. 2006* | DX010655           |
| chloride channel, calcium                                                     | CLCA1           | <b>5q15</b>     | R: CTCCAGCAGGAAATGGAGAAT    |     |     |    |                         |                    |
|                                                                               |                 |                 | F: CTGCTTTTCCTGATGGTGCTA    | 198 | 1.5 | 55 | Perrocheau et al. 2006* | DX010446           |
|                                                                               |                 |                 | R: CTGTCTTTGTGAGGCCTTGTC    |     |     |    |                         |                    |
|                                                                               |                 |                 | F: CCTTGAAGATGAATGAGGTTGA   | 111 | 1.5 | 56 |                         |                    |
|                                                                               |                 |                 | R: GGTGCTCTTTCACAACTCCA     |     |     |    |                         |                    |
|                                                                               |                 |                 | F: TCGTAACTCTGTCTCCTGAC     | 378 | 3.0 | 58 | Lindgren et al. 2001*   | X69884             |
|                                                                               |                 |                 | R: TCCCGAGACACTGGGCAA       |     |     |    |                         |                    |
|                                                                               |                 |                 | F: TCAGAAATTTACTCCTTTATCC   | 60  | 1.5 | 58 |                         |                    |
|                                                                               |                 |                 | R: TTGCCAAGTATTATCCTACTA    |     |     |    |                         |                    |
|                                                                               |                 |                 | F: GTCGTCTTCCGCAACGAGAG     | 844 | 1.5 | 60 |                         | CK834787           |
|                                                                               |                 |                 | R: CAGCCCAGCATGTAGTAGAA     |     |     |    |                         |                    |
|                                                                               |                 |                 | F: GACAGGAAGCCCTGAGAAAAC    | 500 | 1.5 | 60 |                         | AJ542693           |
|                                                                               |                 |                 | R: ACACCCAGTGTGGATGCAAG     |     |     |    |                         |                    |
|                                                                               |                 |                 | F: TAAGATGAGGGAGAGCGAGGAG   | 743 | 1.5 | 62 |                         | AJ576757           |
|                                                                               |                 |                 | R: GCCAGGCACGAGAAATACAG     |     |     |    |                         |                    |
|                                                                               |                 |                 | F: GTGGCTTTTCATCACTTTTATAGC | 555 | 1.5 | 60 |                         | AJ577078, AC114496 |
|                                                                               |                 |                 | R: CTTAATTGTTCCGTCCTGTCC    |     |     |    |                         |                    |
|                                                                               |                 |                 | F: CGAATTGAGGAGACCCAGACTA   | 240 | 1.5 | 64 |                         | AM114457           |

|                                |        |                 |                             |         |     |    |                        |           |
|--------------------------------|--------|-----------------|-----------------------------|---------|-----|----|------------------------|-----------|
| activated, family member 1     |        |                 | R: ATACTTCCTTCGGCAGCACAATC  |         |     |    |                        |           |
| coatomer protein complex,      | COPA   | 5               | F: AGATTTATCCTTTCCCTCCCCAC  | 124     | 2.0 | 58 |                        | BI961783  |
| subunit alpha                  |        |                 | R: CCAAGGAAAATAGGGAATGGCTA  |         |     |    |                        |           |
| microsatellite                 | COR023 | 5               | F: CGTTTAGCACCTCTCATGAAC    | 269-275 | 2.0 | 58 | Murphie et al. 1999    | AF101392  |
|                                |        |                 | R: TCTTTGCAAAAATAGGGCTTG    |         |     |    |                        |           |
| cathepsin K                    | CTSK   | 5               | F: CAGAGATTGCCATTCCGTTT     | 191     | 2.0 | 55 |                        | XM_041899 |
|                                |        |                 | R: ATAGAATCAGCCCCAGGACA     |         |     |    |                        |           |
| cysteine-rich, angiogenic      | CYR61  | 5               | F: GCTAGACAGCTACAGCCTTCC    | 182     | 1.5 | 58 |                        | DN508934  |
| inducer, 61                    |        |                 | R: CCCTCCCCAAAAGCTACAT      |         |     |    |                        |           |
| death effector domain          | DEDD   | 5               | F: CACAGACTCCCTCAAGCAG      | 113     | 2.0 | 58 |                        | BI961869  |
| containing                     |        |                 | R: GCAGCATCAAGTTCCTCAG      |         |     |    |                        |           |
| DEP domain containing 1        | DEPDC1 | <b>5q16</b>     | F: CTAAGTGTGTTTGGCTTACCTG   | 378     | 1.5 | 56 |                        |           |
|                                |        |                 | R: CACCCCCCGAAAAAGTCATC     |         |     |    |                        |           |
| endothelial differentiation,   | EDG1   | 5               | F: GAAACTCCATAACGGGAGCA     | 223     | 2.0 | 58 |                        | AY011735  |
| sphingolipid G-protein-        |        |                 | R: CAGAATGACGATGGAGAGCA     |         |     |    |                        |           |
| coupled receptor, 1            |        |                 |                             |         |     |    |                        |           |
| coagulation factor V           | F5     | 5               | F: AGATTTTGTTCATTCCCCTAACC  | 201     | 1.5 | 56 |                        |           |
|                                |        |                 | R: CTGCTCTACGCTGAAGAAAC     |         |     |    |                        |           |
| Fas apoptotic inhibitory       | FAIM3  | 5               | F: GAAGTCAAGCTGGAGGGAAC     | 205     | 1.5 | 60 |                        |           |
| molecule 3                     |        |                 | R: CCACTAGGAACAGATTCTGTC    |         |     |    |                        |           |
| Fas ligand                     | FASLG  | 5               | F: AGGTGCGGATGTAAGACAG      | 302     | 1.5 | 56 |                        |           |
|                                |        |                 | R: TCACTTCTAAGCAAGACTCAAC   |         |     |    |                        |           |
| feline leukemia virus subgroup | FLVCR  | 5               | F: CTGATTTCTCTGAAACCTG      | 61      | 1.5 | 56 |                        |           |
| C cellular receptor            |        |                 | R: CAAATTCATTACCCATTAGAAC   |         |     |    |                        |           |
| fibromodulin                   | FMOD   | 5               | F: ACTTCCCCACAGCCATGTACT    | 200     | 1.5 | 60 |                        |           |
|                                |        |                 | R: GAAAACCTTCCTGCCACCTTA    |         |     |    |                        |           |
| far upstream element binding   | FUBP1  | 5               | F: TGTGTAGAAATGAAAATTGGTTTG | 159     | 1.5 | 55 | Perrocheau et al. 2006 | DX010486  |
| protein 1                      |        |                 | R: TGTAAGACACAAAACAGGCATT   |         |     |    |                        |           |
| glucosidase, beta; acid        | GBA    | 5               | F: TGTCTGCAATGCCACGTACT     | 201     | 2.0 | 58 | Chowdhary et al. 2003  | AF134220  |
|                                |        |                 | R: GCACAATTCAGTTCAGCAG      |         |     |    |                        |           |
| guanylate binding protein 1,   | GBP1   | <b>5q14-q15</b> | F: ATCCGAAAGTTCTTCCCAAAG    | 186     | 1.5 | 55 | Perrocheau et al. 2006 | DX010492  |
| interferon-inducible           |        |                 | R: CTTGATGCCTCCTGAGAGAGTT   |         |     |    |                        |           |
| guanylate binding protein 2,   | GBP2   | 5               | F: TGTTCTTATTTTCCCCATGCC    | 150     | 1.5 | 54 |                        |           |
| interferon-inducible           |        |                 | R: AGTGGAGAGGTTGAAATAGAGG   |         |     |    |                        |           |
| ganglioside induced            | GDAP2  | 5               | F: AAAGTATGACTTACTCATTTCC   | 118     | 1.5 | 56 |                        |           |
| differentiation associated     |        |                 | R: TCCTCCTAAACTATCTAAATCC   |         |     |    |                        |           |
| protein 2                      |        |                 |                             |         |     |    |                        |           |

|                                                                             |                |             |                                                            |         |     |    |                        |           |
|-----------------------------------------------------------------------------|----------------|-------------|------------------------------------------------------------|---------|-----|----|------------------------|-----------|
| gap junction protein, alpha 5                                               | GJA5           | 5           | F: AGGTCTGGCTCACAGTCCTC<br>R: GACGGTGTGGAGACGAAGAT         | 199     | 2.0 | 58 | Chowdhary et al. 2003  | AY008788  |
| guanine nucleotide binding protein, alpha inhibiting activity polypeptide 3 | GNAI3          | <b>5q13</b> | F: CAGTGTGGAGTGTGAGACCA<br>R: ACAGTTGCTCCAATTCCAATG        | 182     | 1.5 | 55 | Perrocheau et al. 2006 | DX010495  |
| glutathione S-transferase M3 (brain)                                        | GSTM3          | 5           | F: AAGATCACCCAGAGCAATGC<br>R: TTGTCAGTTGCATGCGGAAA         | 226     | 1.5 | 54 |                        | NM_000849 |
| general transcription factor IIB                                            | GTF2B          | 5           | F: AAAGCTTTAGAAACCAGTGTGG<br>R: CCACAGCTTTACGGGCTATA       | 124     | 1.5 | 58 |                        | NM_001514 |
| hippocampus abundant transcript 1                                           | HIAT1          | 5           | F: GCACTTGGAAGTATGCAGA<br>R: ACAATGGGAACACCGAGGTA          | 480     | 1.5 | 58 |                        | CK951802  |
| hemicentin 1                                                                | HMCN1          | 5           | F: ATGACCTGGAATGTGCCTTG<br>R: CTTAAGGCAAAAGGAACAGTCTG      | 181     | 1.5 | 58 |                        | NM_031935 |
| microsatellite                                                              | HMS05          | 5           | F: TAGTGTATCCGTCAGAGTTCAAAG<br>R: GCAAGGAAGTCAGACTCCTGGA   | 102-108 | 2.0 | 58 | Guérin et al. 1994     | X74634    |
| microsatellite                                                              | HTG15          | 5           | F: TCTTGATGGCAGAGCCAGGATTTG<br>R: AATGTCACCATGCGGCACATGACT | 130-146 | 3.0 | 58 | Marklund et al. 1994   | AF169299  |
| interleukin 10                                                              | IL10<br>(CSIF) | 5           | F: AGCATCCTAGGGAACGAA<br>R: TTCACAGAGAAGCTCAGTAAAT         | 202     | 3.0 | 58 | Lindgren et al. 2001   | U38200    |
| integrator complex subunit 7                                                | INTS7          | 5           | F: GATCTGGCAAACCTTGGTGAA<br>R: AAATGCTTCTCACTTTGTTGAGTA    | 995     | 1.5 | 58 |                        | NM_015434 |
| influenza virus NS1A binding protein                                        | IVNS1ABP       | 5           | F: TTCTTCATGGGCGAAACAGC<br>R: GGAGACATGGGCTTTTCTATT        | 112     | 1.5 | 58 |                        | NM_006469 |
| jumping translocation breakpoint                                            | JTB            | 5           | F: TCTGTGGTGGCAGAAGAGTG<br>R: GAGCTGCATGTGATTTTCTCC        | 888     | 1.5 | 60 |                        | CX602145  |
| KIAA0907                                                                    | KIAA0907       | 5           | F: TTGGCTTGGTGGCTTATG<br>R: CGGCATCCCTAACTTCTG             | 288     | 2.0 | 58 |                        |           |
| keratinocyte associated protein 2                                           | KRTCAP2        | 5           | F: CTCCTTTGCCTCCTGTTGG<br>R: GTTGCTGGTACAGAGTCGAG          | 362     | 3.0 | 58 |                        | BI961691  |
| laminin, gamma 1                                                            | LAMC1          | 5           | F: GCTCCATGGTAGGCACTATGA<br>R: TCCGACAGTTCGGTATCATTC       | 216     | 2.0 | 58 | Chowdhary et al. 2003  | AF134225  |
| LAG1 homolog, ceramide synthase 2 (S. cerevisiae)                           | LASS2          | 5           | F: ATCACCCGACTGGTCATCCT<br>R: TAGAGCTCCAGTGGGTACACC        | 194     | 1.5 | 58 |                        | NM_181746 |
| leptin receptor                                                             | LEPR           | <b>5q17</b> | F: CCGTTGTTCTGTCCTGATCTT<br>R: AATGATAGGCAGTCCGAAGG        | 159     | 3.0 | 58 |                        |           |
| microsatellite                                                              | LEX004         | 5           | F: AATAGCAAATCTCCCACTTCA<br>R: GTCCTCACAACTCATCATAA        | 275-293 | 2.0 | 50 | Coogle et al. 1996     | AF075608  |

|                                                               |          |             |                                                        |         |     |    |                                              |           |
|---------------------------------------------------------------|----------|-------------|--------------------------------------------------------|---------|-----|----|----------------------------------------------|-----------|
| microsatellite                                                | LEX014   | 5q16-q17    | F: AACCACCTCTTTTCGTCAACCA<br>R: GCCCCTATCCCTACGAAGAA   | 197     | 3.0 | 58 | Coogle et al. 1996;<br>Lindgren et al. 2001* | AF075616  |
| microsatellite                                                | LEX034   | 5           | F: GCGGAGGTAAGAAGTGGTAG<br>R: GGCCTAAGATGAGGGTGAA      | 245-257 | 3.0 | 58 | Coogle et al. 1997                           | AF075636  |
| microsatellite                                                | LEX069   | 5           | F: TTTCTTTTTTCCCACTTAAAGC<br>R: TGGGACTTAGCAGTATGAAAC  |         |     |    | Coogle et al. 1999                           |           |
| latrophilin 2                                                 | LPHN2    | 5           | F: GTGAAAAGCTCTTGGTTGCAC<br>R: TGGCATAACTGGCTTCAAAGA   | 202     | 1.5 | 55 | Perrocheau et al. 2006                       | DX010517  |
| leucine rich repeat containing 39                             | LRRC39   | 5           | F: GAATGGCAACTTCATAGAACTGGT<br>R: CCAAGCTGGCACAGTGACTT | 1096    | 1.5 | 58 |                                              | NM_144620 |
| mitogen-activated protein kinase-activated protein kinase 2   | MAPKAPK2 | 5           | F: GAGGAAGAGGCAGAGGTTAG<br>R: GAGAGGAAGCAGGAAGAGAG     | 309     | 1.5 | 60 |                                              |           |
| mesoderm induction early response 1 homolog (Xenopus laevis)  | MIER1    | 5           | F: GAGTTTCGGACGTGGTTAAG<br>R: TGAGGGAGTTCGGATTTTCC     | 118     | 1.5 | 58 |                                              | NM_020948 |
| neutrophil cytosolic factor 2                                 | NCF2     | 5           | F: TTTGCATCTGACCATGTCCC<br>R: AGCCGATGTTAAAGCAAATCC    | 146     | 1.5 | 58 |                                              |           |
| NADH dehydrogenase (ubiquinone) Fe-S protein 2                | NDUFS2   | 5           | F: TCCCATACTTTGACCGGCTA<br>R: GGTTCAAAAGCCGTGTGATT     | 319     | 1.5 | 60 |                                              | CD468843  |
| nerve growth factor, beta polypeptide                         | NGFB     | 5           | F: TCACTGTGGACCCCAAACTT<br>R: TCCTGTGAGTCCTGTTGAAGG    | 147     | 2.0 | 58 | Chowdhary et al. 2003                        | AF134228  |
| nuclear casein kinase and cyclin-dependent kinase substrate 1 | NUCKS1   | 5           | F: GGCTTTCAATGCTTTTTTCCT<br>R: CCAGTGATTAATTTGACATGGC  | 178     | 1.5 | 60 |                                              |           |
| microsatellite                                                | NVHEQ122 | 5           | F: GAGGAGGGTTGGCAGCAGAT<br>R: CCAAGGGGGCACAAGACATA     | 203-207 | 1.5 | 58 | Penedo et al. 2005                           |           |
| oviductal glycoprotein 1                                      | OVGP1    | <b>5q13</b> | F: AGGGGAGTGGTAAACAGAATG<br>R: TGAGAAAGGCAAAATGCGAG    | 260     | 1.5 | 58 |                                              |           |
| phosducin                                                     | PDC      | 5           | F: TTCGGTTTGTCAATATCTCACC<br>R: AACACTGAGGAAAAAACAGGG  | 316     | 1.5 | 58 |                                              |           |
| phosphodiesterase 4B, cAMP-specific (Drosophila)              | PDE4B    | 5           | F: ATCAGAGCATGATACCCCA<br>R: TACCATACAGCTGGCATGCT      | 217     | 1.5 | 62 |                                              | CN792407  |
| phosphoglucomutase 1                                          | PGM1     | <b>5q17</b> | F: ATTCTTCTCATCTGCTGTACC<br>R: CATCTGCTGCTCCATCATC     | 116     | 1.5 | 56 |                                              |           |

|                                                             |               |          |                                                             |     |     |    |                                                   |           |
|-------------------------------------------------------------|---------------|----------|-------------------------------------------------------------|-----|-----|----|---------------------------------------------------|-----------|
| phosphatidylinositol glycan anchor biosynthesis, class C    | PIGC          | 5p17-p16 | F: GCTGACTTGAAGAGTGCCCTA<br>R: AGGCAGACAGAAGCAAAGATG        | 215 | 1.5 | 55 | Perrocheau et al. 2006*                           | DX010557  |
| phosphatidylinositol glycan anchor biosynthesis, class K    | PIGK          | 5        | F: ACCTTGGGTAAACATTTGTCA<br>R: TTAGCGTCATTTAGCACTCG         | 154 | 1.5 | 58 |                                                   | CX600327  |
| pyruvate kinase, liver and RBC                              | PKLR          | 5        | F: AGATACGCACTGGGATCCTG<br>R: CCAGCTCCACTTTTGATTCC          | 197 | 2.0 | 58 | Shubitowski et al. 2001;<br>Chowdhary et al. 2003 | AY008804  |
| phospholipase A2, group IVA                                 | PLA2G4A       | 5        | F: GGGCCAGAGGAGATTAATAAAG<br>R: GAGACAGGTGAAAAGAGGTAAC      | 550 | 1.5 | 60 |                                                   |           |
| pleckstrin homology domain containing, family A member 6    | PLEKHA6       | 5        | F: AATCTTGACTGTAGAGCCCC<br>R: GCAAGTGGTGGCAAACATAC          | 430 | 1.5 | 60 |                                                   | AJ584242  |
| protein phosphatase 2, regulatory subunit B', alpha isoform | PPP2R5A       | 5        | F: TTCCTAAGATTGTTTCCTCACG<br>R: GGAAGCCTACTTCATTTCTTTT      | 284 | 1.5 | 58 |                                                   | CX594395  |
| proteoglycan 4                                              | PRG4          | 5        | F: TTATCCAAAGTCTGGTACAACCTG<br>R: TGTCTACAAACTGTAATAAATGTGA | 216 | 1.5 | 60 | Chowdhary et al. 2003                             | AY246746  |
| protein kinase, AMP-activated, beta 2 non-catalytic subunit | PRKAB2        | 5p12     | F: GGACGAGGAATAGAGACCTG<br>R: GCCAGCAACAAATGACATTAC         | 351 | 1.5 | 60 |                                                   |           |
| prostaglandin-endoperoxide synthase 2                       | PTGS2         | 5p16-p15 | F: GACCGAGTTAAATCAGGATGA<br>R: CGCTTCACTGTAATGCCAG          | 435 | 3.0 | 58 | Lindgren et al. 2001;<br>Musilova et al. 2005*    | AF027335  |
| regulator of G-protein signalling 5                         | RGS5          | 5        | F: GTTCTGGATTGCCTGTGAGG<br>R: TCTTTAGGAGCCTCCGTTTG          | 108 | 1.5 | 58 |                                                   | NM_003617 |
| regulator of G-protein signalling 16                        | RGS16         | 5        | F: TTAAATCAATGTCCCCACTTCC<br>R: TGTCAACCATAACCCAGAG         | 109 | 1.5 | 56 |                                                   |           |
| ring finger protein 2                                       | RNF2          | 5        | F: GCCATCCTTTTCTCCTCTC<br>R: TTGTTTGATTCTCTTTCCCAGG         | 328 | 1.5 | 60 |                                                   |           |
| RUN and SH3 domain containing 1                             | RUSC1 (NESCO) | 5p12     | F: CTGGTGGAAGCAGCTGACC<br>R: CCAGGCACTCCAAACAGTCTC          | 190 | 1.5 | 55 | Perrocheau et al. 2006                            | DX010644  |
| S100 calcium binding protein A1                             | S100A1        | 5p12     | F: GTGGACAAGGTGATGAAGGAC<br>R: TGTTACAGGCCACTGTGAGG         | 100 | 1.5 | 58 |                                                   |           |
| S100 calcium binding protein A7                             | S100A7        | 5p13-p12 | F: CTTGGCCAATGTCTTTGAG<br>R: GTTCTTGCGGTCTCTGG              | 183 | 1.5 | 58 | Leeb et al. 2005*                                 | AW260999  |

|                                               |                                |          |                                                         |         |     |    |                        |          |
|-----------------------------------------------|--------------------------------|----------|---------------------------------------------------------|---------|-----|----|------------------------|----------|
| S100 calcium binding protein A9               | S100A9                         | 5        | F: GCGCGACATAGAGACCATCATC<br>R: GCTCTTTTTGAACCAGCTGTTTG | 107     | 2.0 | 58 |                        | BI961525 |
| serpin peptidase inhibitor, clade C, member 1 | SERPINC1<br>( <i>HEST007</i> ) | 5p17-p16 | F: CAGGGGTTGGCTACTCTGCCC<br>R: AAATGAGGAAGGCAGTGAAGCTGC | 165 bp  | 1.5 | 58 | Perrocheau et al. 2006 | AW735739 |
| SH3-domain GRB2-like endophilin B1            | SH3GLB1                        | 5        | F: GAGTGAATTTGATCGTCAAGC<br>R: CTGGAGGTCTAACATGTACTGG   | 539     | 2.0 | 62 | Chowdhary et al. 2003  |          |
| solute carrier family 16, member 1            | SLC16A1                        | 5        | F: GGCAAAGAATGAGGGAAGAAC<br>R: AATTAGCAAACATTGGGGGG     | 888     | 1.5 | 60 |                        |          |
| Jun dimerization protein p21SNFT              | SNFT                           | 5        | F: GTCTTTTCCACACCCTTACATC<br>R: AGAGGAAGTGATTCTGCATAAC  | 225     | 1.5 | 58 |                        |          |
| sterol O-acyltransferase 1                    | SOAT1                          | 5        | F: GTGCTCTTCATGTTCTTTGG<br>R: GTGCATACCACTCTTGAGA       | 1031    | 1.5 | 58 |                        | BI541987 |
| synaptotagmin XIV                             | SYT14                          | 5        | F: ACAACACCAAGTGAGGTTCC<br>R: TGCCATCTAATGGCTAATATGC    | 405     | 1.5 | 60 |                        | AJ542913 |
| tudor and KH domain containing microsatellite | TDRKH                          | 5        | F: CCTTTGCCTTTCTTTTCACAC<br>R: GACATTTCTCTGCCGCTAAC     | 324     | 1.5 | 56 |                        |          |
| microsatellite                                | TKY041                         | 5p18     | F: TGGACAAGTGCTCTGTAATG<br>R: TTCCATGAGTCTGGAGTTGG      | 160     | 2.0 | 58 | Hirota et al. 2001*    |          |
| microsatellite                                | TKY271                         | 5        | F: CAGTGAAGAGTGAATGGATA<br>R: GCAAATGGCAGAAATTCCTT      | 112-124 | 1.5 | 56 | Kakoi et al. 2000      | AB048313 |
| microsatellite                                | TKY331                         | 5        | F: AGAGTGGGAGATGTTTATGC<br>R: CACTGAAATGAACACATCCTC     | 288-298 | 1.5 | 58 | Tozaki et al. 2001     | AB044832 |
| microsatellite                                | TKY334                         | 5        | F: AAGTCCAAGGCTAGTTTCAC<br>R: ATCTTTGTGCTACTTTGTGTAC    | 139-149 | 1.5 | 58 | Tozaki et al. 2001     | AB044835 |
| microsatellite                                | TKY389                         | 5        | F: TGCCAATGTGTCTCTCTTTTC<br>R: CGCACTGTGGTGTATTCTGG     | 172     | 1.5 | 58 |                        | AB048295 |
| microsatellite                                | TKY456                         | 5        | F: GCTGGATGGATAAATGAATGG<br>R: TGTTCGACTGAGCAGAGAGG     | 176-198 | 1.5 | 58 | Tozaki et al. 2004     | AB103674 |
| microsatellite                                | TKY464                         | 5        | F: CCTATTCCACTCCTGGGTCA<br>R: TATGTCCCGAAAGCAAGACC      | 235-243 | 1.5 | 58 | Tozaki et al. 2004     | AB103682 |
| microsatellite                                | TKY489                         | 5        | F: AAACCCATCACATACGCACA<br>R: TGCAAATGAAATGCTGTTCC      | 175-191 | 1.5 | 55 | Tozaki et al. 2004     | AB103707 |
| microsatellite                                | TKY508                         | 5        | F: CAAAGCCCGCAGGATAAATA<br>R: GCATTGCAAGTGCAGAAGTC      | 171-177 | 1.5 | 58 | Tozaki et al. 2004     | AB103726 |
| microsatellite                                | TKY521                         | 5        | F: TCTTCTCAGGATTTGGGAGGT<br>R: CCCTTCTGAACGGCTTATGA     | 217-223 | 1.5 | 58 | Tozaki et al. 2004     | AB103739 |
| microsatellite                                | TKY525                         | 5        | F: TGAGTGCGGTACCTTTCCAT                                 | 225-235 | 1.5 | 58 | Tozaki et al.          | AB103743 |

|                |         |   |                                                       |         |     |    |                       |          |
|----------------|---------|---|-------------------------------------------------------|---------|-----|----|-----------------------|----------|
| microsatellite | TKY544  | 5 | R: GGAACCGTGCTGGGATACTA<br>F: TGACCCAGTAAGCAGCCTGT    | 273-315 | 1.5 | 58 | 2004<br>Tozaki et al. | AB103762 |
| microsatellite | TKY616  | 5 | R: TGCCAGGGGAAGAACATTTA<br>F: ACCCTGGACAGGCGCCAGAC    | 157     | 2.0 | 58 | 2004                  | AB103834 |
| microsatellite | TKY644  | 5 | R: AACAGGGCGACTGGGACGAC<br>F: TAAGTGTCCGCAGACTTTAG    | 142     | 2.0 | 58 |                       | AB103862 |
| microsatellite | TKY673  | 5 | R: TAGGACAAAGCACACTATGA<br>F: TCCAGTTTAGGGGTATATGT    | 176     | 2.0 | 58 |                       | AB103891 |
| microsatellite | TKY731  | 5 | R: CCATGATGCTGACCTCTTTG<br>F: GGGCACAGACCTACTCCACT    | 236-258 | 1.5 | 58 | Tozaki et al.         | AB103949 |
| microsatellite | TKY739  | 5 | R: GCAACAGCATCCCAGAATTT<br>F: TTTCCAAACAAAGGCACACG    | 186     | 2.0 | 58 | 2004                  | AB103957 |
| microsatellite | TKY774  | 5 | R: GCAGAACGTGTGCACTTAAC<br>F: ACCATGCTCTTTCCAAACTCAA  | 92      | 2.0 | 58 | Tozaki et al.         | AB103992 |
| microsatellite | TKY801  | 5 | R: CGAGGTGGGTTGTACATTTA<br>F: TCCCTAAGCTAATTCCATCC    | 151     | 2.0 | 58 | 2004<br>Tozaki et al. | AB104019 |
| microsatellite | TKY847  | 5 | R: GCGCTTGCTCATCTAAAAGC<br>F: GATTGCATTTGGCAAAGTCC    | 197     | 2.0 | 58 | 2004                  | AB104065 |
| microsatellite | TKY887  | 5 | R: CCTACACACCACTCATCAAG<br>F: GAGAACTAGATGCCACCC      | 100     | 2.0 | 58 | Tozaki et al.         | AB104105 |
| microsatellite | TKY889  | 5 | R: TGTTGGAGTGTGTAGGCT<br>F: CATCCCAAACAAACAGCAGA      | 179     | 1.5 | 58 | 2004                  | AB104107 |
| microsatellite | TKY911  | 5 | R: GCAGCCAACTCAAAAACCTCC<br>F: GATCTTTAGAATCAGCTTGTTG | 140     | 2.0 | 58 | Tozaki et al.         | AB104129 |
| microsatellite | TKY1078 | 5 | R: CTCGCCACGTTAGTTGATG<br>F: CTTCTTAGGTCAAGAGCTA      | 187     | 2.0 | 58 | 2004                  | AB104296 |
| microsatellite | TKY1108 | 5 | R: TTCCTCTACATGACTGCATC<br>F: CGGAGATGTGAAAACCTTGG    | 164     | 2.0 | 58 |                       | AB104326 |
| microsatellite | TKY1117 | 5 | R: ACTGAATTGCCCCATTTGTC<br>F: ATTAACAACTGCCCCCAG      | 256     | 2.0 | 58 |                       | AB104335 |
| microsatellite | TKY1163 | 5 | R: CCAGACTTCCAAAGGTGAAC<br>F: TGTGGGTATGAGTGAGGTG     | 220     | 2.0 | 58 |                       | AB104381 |
| microsatellite | TKY1175 | 5 | R: TCCTTAGAACATGCTCTGAC<br>F: TTATCACCAGTTTCCAGAGC    | 203     | 2.0 | 58 | Tozaki et al.         | AB104393 |
| microsatellite | TKY1777 | 5 | R: CTTATTCCACCCACTAATTACAC<br>F: TGATGGCTAAACTTGAGAAG | 294     | 1.5 | 58 | 2004                  | AB215720 |
|                |         |   | R: AATACCCATAGGAATTGAGG                               |         |     |    |                       |          |

|                                             |               |          |                                                         |        |     |    |                             |           |
|---------------------------------------------|---------------|----------|---------------------------------------------------------|--------|-----|----|-----------------------------|-----------|
| microsatellite                              | TKY1909       | 5        | F: TAATTATAAGCTCCGGACAG<br>R: AGATAGAGGACAAACCCCA       | 249    | 1.5 | 58 | Tozaki et al. 2007          | AB215852  |
| microsatellite                              | TKY2544       | 5        | F: TGTCCATTTACACCCTACCTG<br>R: GTTGCTGACAGCCTTGTTTT     | 174    | 1.5 | 58 | Tozaki et al. 2007          | AB216487  |
| transmembrane and coiled-coil domains 1     | TMCO1         | 5        | F: AGATGAGCACCATGTTTCGCG<br>R: TTCCACTTCTGCCTTCAGTC     | 546    | 1.5 | 58 |                             | NM_019026 |
| torsin A interacting protein 2              | TOR1AIP2      | 5        | F: GCCCTGAGTGTTATCCTGAT<br>R: GGGTTAAAGCCAGCTACTCTA     | 184    | 1.5 | 58 |                             | NM_145034 |
| tropomyosin 3                               | TPM3          | 5        | F: GCCCTAGTCTCCAATTCTCCA<br>R: TCAGCTGCCTTCTTCTCTGC     | 888    | 1.5 | 62 |                             | CX601529  |
| translocated promoter region                | TPR           | 5        | F: CAGTTTCATATCTACATGCC<br>R: ACACCTGTAAGAGAAAAAAG      | 136    | 1.5 | 54 |                             |           |
| TRAF3 interacting protein 3                 | TRAF3IP3      | 5        | F: CTGCGACTTTTGGAGAATGA<br>R: CTTGTAGGTGTTGGGTGTCTG     | 100    | 1.5 | 58 |                             |           |
| thyroid stimulating hormone, beta           | TSHB          | 5q14-q15 | F: TGCTTATTGCCTCACCATCA<br>R: TACCAGCTCAGCACATCCAC      | 391    | 2.0 | 58 | Milenkovic et al. 2002*     | AF165601  |
| thioredoxin interacting protein             | TXNIP (VDUPI) | 5p12     | F: CCAGCAAGATGATGTGGTATGG<br>R: AACCCCTTCCAAAAACCTTG    | 178    | 2.0 | 55 | Lear et al. 2001*           | G62161    |
| UDP-N-acetylglucosamine pyrophosphorylase 1 | UAP1          | 5        | F: TTCACCGTACCGTTTCTGAG<br>R: GTCTGGCTTAATTAAGTGTCCC    | 1141   | 1.5 | 58 |                             | NM_003115 |
| microsatellite                              | UCDEQ304      | 5        | F: CGCTTTCCTGCTGTCACC<br>R: GAGGGACTGTGGGGGAGGT         | 97-115 | 2.0 | 58 | Eggleston-Stott et al. 1999 | U67402    |
| microsatellite                              | UMNe108/163   | 5        | F: AGCTGCTAGCCAGGCAGAGA<br>R: GATCTTGTTCAGGTGCTATAAA    | 105    | 1.5 | 60 | Mickelson et al. 2003       | AF536251  |
| microsatellite                              | UMNe190       | 5        | F: AGATGAAGGCTGCTCTGAGC<br>R: GATCAGTTTGAACATTTACAGTGTG | 91     | 2.0 | 58 | Mickelson et al. 2003       | AF536278  |
| microsatellite                              | UMNe220       | 5        | F: TTGATGATACAGTGTTGGAGGG<br>R: TTAACCATTACACCACCGGG    | 293    | 2.0 | 55 | Mickelson et al. 2003       | AF536299  |
| microsatellite                              | UMNe230       | 5        | F: TGGTCTAGAGTACACATACACCAAC<br>R: TTTCTCCTTCCACCCAG    | 109    | 2.0 | 55 | Wagner et al. 2004a         | AY391324  |
| microsatellite                              | UMNe237       | 5        | F: TTAAAAGCAAGCCAGAGGGA<br>R: GATCTTCATGTAAACACACACAGAT | 109    | 2.0 | 55 | Mickelson et al. 2003       | AF536308  |
| microsatellite                              | UMNe255       | 5        | F: TAGGAGGACCAGAGAGGAACC<br>R: TCCAGAAGCAAAAATTGAGGC    | 181    | 2.0 | 58 | Mickelson et al. 2003       | AF536319  |
| microsatellite                              | UMNe306       | 5        | F: TTGTGGACGTAGCACTGCTC<br>R: CTTTAACCCAGACTCTTCCCTG    | 217    | 2.0 | 58 |                             |           |



|                                             |         |             |                                                              |         |     |    |                           |          |
|---------------------------------------------|---------|-------------|--------------------------------------------------------------|---------|-----|----|---------------------------|----------|
| microsatellite                              | UMNe361 | 5           | F: AGGGAATAACTTATGAACAGATGAA<br>R: TCTTTATGGAAATTCTCTCTGAACC | 169     | 2.0 | 62 | Wagner et al. 2004a       | AY391349 |
| microsatellite                              | UMNe383 | 5           | F: CCATCCACATTATCACAAATGG<br>R: CACCAAGGTATGGAAATGACC        | 151     | 2.0 | 58 | Wagner et al. 2004b       | AY464473 |
| microsatellite                              | UMNe412 | 5           | F: GATCAAAATACAGAAGATTACGTG<br>R: TGATGCTCTGGAAACCAGTC       | 170     | 1.5 | 58 | Wagner et al. 2004b       | AY464482 |
| microsatellite                              | UMNe454 | 5           | F: GGGAGAAACACCTACAGAGTGG<br>R: AGACTGAATTGCCCCATTTG         | 244     | 1.5 | 60 | Mickelson et al. 2004     | AY731397 |
| microsatellite                              | UMNe455 | 5           | F: TGAGGTACTGTGCCTTGCTG<br>R: CTGGGAAGACAGAGCCAGTC           | 130     | 1.5 | 60 | Mickelson et al. 2004     | AY731398 |
| microsatellite                              | UMNe477 | 5           | F: GTCAAGGAACAGCTGAAGGTG<br>R: TTCCTGAGCTAGGGTAGGAGC         | 322     | 1.5 | 60 |                           |          |
| microsatellite                              | UMNe481 | 5           | F: ACATTGGGCCAGTTGCTTAC<br>R: ATTGTTGGGACACCAGATTACC         | 130     | 1.5 | 55 | Wagner et al. 2004b       | AY464499 |
| microsatellite                              | UMNe515 | 5           | F: CTCTGACCTCACTGTCTGCG<br>R: TATTCGGGGAGCTGCAAG             | 130     | 1.5 | 55 | Wagner et al. 2004b       | AY464514 |
| microsatellite                              | UMNe534 | 5           | F: ATGTTGTTGCAAATGGTAGGG<br>R: TCCATCAATCCCTCTTCTGG          | 249     | 1.5 | 62 | Wagner et al. 2004c       | AY735262 |
| microsatellite                              | UMNe536 | 5           | F: CTGGCTGGAGACAGTCCTTC<br>R: ACGCTGACCACAGTTCGAG            | 125     | 1.5 | 58 |                           |          |
| microsatellite                              | UMNe555 | 5           | F: AGACCTCTCTCATGAAC TTCAG<br>R: GGAATCAGGAT TTCAGTTATGG     | 120     | 1.5 | 62 | Wagner et al. 2004c       | AY735268 |
| microsatellite                              | UMNe582 | 5           | F: TCTTGACCTTCTTTACTTAGTACACA<br>R: CCTGGGCATAGACCTACACA     | 175     | 1.5 | 58 | Wagner et al. 2004c       | AY735282 |
| microsatellite                              | UMNe604 | 5           | F: AGACTTGCCCAGCAGCAC<br>R: ACCTCCAGCCCAGCTTTC               | 240     | 1.5 | 58 | Wagner et al. 2004c       | AY735294 |
| ubiquitin specific peptidase 1              | USP1    | <b>5q17</b> | F: CAACCAACGACAGCTATGGA<br>R: CACACCCCTTACTTCCTCCTC          | 194     | 1.5 | 55 | Perrocheau et al. 2006    | DX010606 |
| vascular cell adhesion molecule 1           | VCAM1   | 5q14        | F: GACTGGCAGCTGACCTATGTC<br>R: AGTCTGATGAATCAACATCGTAGC      | 262     | 2.0 | 58 | Lear et al. 2001*         | G62179   |
| microsatellite                              | VHL66   | 5           | F: TCTTTAAAATTTGATGCACAATGGT<br>R: GGGGAGAATTTACTTATCTTGAC   | 102-108 | 3.0 | 58 | Van Haeringen et al. 1998 | Y08440   |
| WD repeat domain 42A                        | WDR42A  | 5           | F: TTACCTCTTCAACTCCTCTC<br>R: TTGTCCCCCTCCATGAACT            |         |     |    | CB448605, XM_066690       |          |
| wingless-type MMTV integration site family, | WNT2B   | 5           | F: CTAAAGGGACAGACGGTTGTG<br>R: CAGGTTTGATCCAGCCACTCT         | 190     | 1.5 | 55 | Perrocheau et al. 2006    | DX010611 |

|                                              |         |             |                                                      |     |     |    |                                                               |           |
|----------------------------------------------|---------|-------------|------------------------------------------------------|-----|-----|----|---------------------------------------------------------------|-----------|
| member 2B                                    |         |             |                                                      |     |     |    |                                                               |           |
| zinc finger, RAN-binding domain containing 2 | ZRANB2  | 5           | F: GTCTTTTACAGCAGCTTATC<br>R: CTTTTTACGTCCAAACTACAG  | 175 | 1.5 | 54 |                                                               |           |
| microsatellite                               | ZuBeEq2 | <b>5q15</b> | F: GTTGGAGATACGGCCACATT<br>R: CCCGTTAGGGTGTTTCTCCT   | 160 | 1.5 | 64 | Klukowska<br>Rotzler et<br>al. 2006;<br>Horsemap<br>database* | AM040154  |
| zinc finger, ZZ-type containing 3            | ZZZ3    | 5           | F: CTCATGGTGTGTGAATGTTAGA<br>R: CTACCACTGGCACTTTTCAC | 113 | 1.5 | 58 |                                                               | NM_015534 |

| Name                                                                                  | Symbol   | Horse chr. | Primers                                                | Product size (bp) | MgCl <sub>2</sub> (mM) | T <sub>a</sub> | Reference              | Accession No |
|---------------------------------------------------------------------------------------|----------|------------|--------------------------------------------------------|-------------------|------------------------|----------------|------------------------|--------------|
| microsatellite                                                                        | 6CA001   | 6          | F: GTGCCTGCTTCTCCCTAATG<br>R: CTTGGGGGCTGGTATCATAA     | 249-253           | 1.5                    | 58             | Penedo et al. 2005     |              |
| sequence tagged site                                                                  | 6STS01   | 6          | F: CCAACAATTCTTCAATTCAGTG<br>R: TCCCAGTAAGGAAATAGCATTG | 250               | 1.5                    | 60             |                        |              |
| adiponectin receptor 2                                                                | ADIPOR2  | 6          | F: GCTTGAGTATCCCATGAATGA<br>R: ATCACCTCCCTTTGTACCATC   | 115               | 2.0                    | 56             |                        | DN507534     |
| ADP-ribosylation factor-like 4C                                                       | ARL4C    | 6          | F: GACCTGTCCTACCAAATGGAC<br>R: CCTAAGTTCAGTCAGCCATCA   | 200               | 1.5                    | 60             |                        | CX594150     |
| activating transcription factor 7 interacting protein                                 | ATF7IP   | 6          | F: CCTTGCAGAAACCATTAGTGA<br>R: CAAAAGAACCCTCCATCTTCT   | 212               | 1.5                    | 58             |                        |              |
| ATG9 autophagy related 9 homolog A (S. cerevisiae)                                    | ATG9A    | 6          | F: CAGCACCATGACAGGCTCT<br>R: TGCATATACAGGGCATGCAG      | 239               | 1.5                    | 58             |                        |              |
| 5-aminoimidazole-4-carboxamide ribonucleotide formyltransferase/IMP cyclohydrolase    | ATIC     | 6          | F: GAGCAGGACAGCAGTCTCGTA<br>R: TCGCCGATAGTTCCAGTAACA   | 169               | 1.5                    | 55             | Perrocheau et al. 2006 | DX010434     |
| ATP synthase, H <sup>+</sup> transporting, mitochondrial F1 complex, beta polypeptide | ATP5B    | 6          | F: AGGTAGCGCTGGTGTATGGT<br>R: CCTGGGTGAAGCGAAAGATA     | 150               | 1.5                    | 58             |                        |              |
| ATP synthase, H <sup>+</sup> transporting, mitochondrial F0 complex, subunit C2       | ATP5G2   | 6          | F: TGCTGAGCCGATCACTGTCT<br>R: CAATGAACTGGCTGCTGTGT     | 698               | 2.0                    | 58             |                        | BI961853     |
| ATPase, H <sup>+</sup> transporting, lysosomal 31kDa, V1 subunit E1                   | ATP6V1E1 | 6          | F: GGTGAGGGGTCAGATAGTGG<br>R: GCCCAAACAGCTAACAGTGA     | 183               | 1.5                    | 58             |                        | CX604368     |
| C1q domain containing 1                                                               | C1QDC1   | 6          | F: GAACCTCTAATCTCGCTCCTG<br>R: GCATAGGCAGATACCAAGACC   | 217               | 1.5                    | 58             |                        | CX597695     |

|                                                           |        |        |                                                          |         |     |    |                         |          |
|-----------------------------------------------------------|--------|--------|----------------------------------------------------------|---------|-----|----|-------------------------|----------|
| calcium binding protein 39                                | CAB39  | 6      | F: ATTAGACAGACACAACCTTCACAAT<br>R: GGCCTCAAACCTGGATGTTAC | ~ 120   | 1.5 | 58 |                         |          |
| coiled-coil domain containing 91                          | CCDC91 | 6      | F: AGTCCATCTTTCTCCAGCTTC<br>R: TGCTGTTGTCTGCATGTGTAT     | 125     | 1.5 | 54 |                         |          |
| cyclin D2                                                 | CCND2  | 6      | F: GGAGTGGGAACCTGGTGGTGC<br>R: CGGTGGCACACAGAGCAATG      | 175     | 1.5 | 65 |                         |          |
| cyclin T1                                                 | CCNT1  | 6      | F: GCCCTGCAACATCTCCACA<br>R: ATGCCAGGCTGCCAAGAAA         | 217     | 2.0 | 58 |                         |          |
| CD63 molecule                                             | CD63   | 6      | F: CTTATCACGCTGGTGGGA<br>R: CCAGGATCAAAGCAGTGT           | 231     | 2.0 | 58 |                         | BI961928 |
| cyclin-dependent kinase 2                                 | CDK2   | 6      | F: GCCATCCCAGTCTCTGAAAG<br>R: TTTAAAACAGGCCCTTCCT        | 163     | 1.5 | 60 |                         |          |
| cholinergic receptor, nicotinic, gamma                    | CHRNA3 | 6      | F: CCCTCACCACCAATGTCTG<br>R: CCCCTCTCTCTGCTACATCG        | 178     | 2.0 | 58 | Chowdhary et al. 2003   | AF130751 |
| C-type lectin domain family 2, member B                   | CLEC2B | 6      | F: ACATGATTGGATTGGTTTCC<br>R: CATTCTTCAACGGTGTCAAT       | 130     | 1.5 | 50 |                         | DN505051 |
| cytidine monophosphate N-acetylneuraminic acid synthetase | CMAS   | 6q21.2 | F: GTGTGGGTTTCAACAGACCAT<br>R: ACTGATGGCGTCTCACAAC       | ~434    | 1.5 | 68 | Perrocheau et al. 2005* | CX596382 |
| collagen, type II, alpha 1                                | COL2A1 | 6      | F: CAACGTCCAGATGACCTTCCT<br>R: CAGCCATCCTTCAGGACAGTA     | 201     | 1.5 | 55 | Perrocheau et al. 2006  | DX010616 |
| collagen, type IV, alpha 4                                | COL4A4 | 6      | F: AGACAGACGGACAGCAGTAG<br>R: TGAGGGAAGGAGAAGTAGTGG      | 196     | 1.5 | 58 | Wagner et al. 2006      | DQ001082 |
| coenzyme Q10 homolog A (S. cerevisiae)                    | COQ10A | 6      | F: AGGTGGTGTCCAATGTCCAG<br>R: CCCATGAAAACAGCAGAGGT       | 151     | 1.5 | 58 |                         |          |
| microsatellite                                            | COR010 | 6      | F: TTGAAGGGTGGAGTAGGG<br>R: GACAAGAAGGGATGAAGGAG         | 289-299 | 2.0 | 58 | Hopman et al. 1999      | AF083453 |
| microsatellite                                            | COR019 | 6      | F: GAAAGGTCAGAACAGGCAGA<br>R: CTAGGAATGTGTGTACATGTGTT    | 220-222 | 2.0 | 58 | Hopman et al. 1999      | AF083462 |
| microsatellite                                            | COR070 | 6      | F: CATCTGTTCCGTGGCATT<br>R: TTCAGGTGTGGGTTTTGAATC        | 267-295 | 3.0 | 58 | Tallmadge et al. 1999a  | AF142607 |
| microsatellite                                            | COR088 | 6      | F: GAGCCAGCTTGTTCGTGTATT<br>R: GCACGAAGAAGAACCAAGA       | 276-290 | 2.0 | 58 | Tallmadge et al. 1999b  | AF154941 |

|                                                                  |                  |                 |                                                          |      |     |    |                                             |          |
|------------------------------------------------------------------|------------------|-----------------|----------------------------------------------------------|------|-----|----|---------------------------------------------|----------|
| carbamoyl-phosphate synthetase 1, mitochondrial                  | CPS1             | 6               | F: TCAAATGAGATTCCAAGGGAAG<br>R: TGAGGGACAGTAAAGAGATGAC   | 242  | 1.5 | 58 | Wagner et al. 2006                          | DQ001083 |
| cullin 3                                                         | CUL3             | 6               | F: CATATGTAGCATAAAATGCGC<br>R: CCTGTTTTTCATACAGTATTGAAA  | 294  | 3.0 | 58 | Chowdhary et al. 2003                       | G62174   |
| dynactin 2 (p50)                                                 | DCTN2            | 6               | F: CTCTCCCCTTCCCGAACAC<br>R: GGGAGGTCGGCGTATTTAG         | 100  | 1.5 | 58 |                                             |          |
| DEAD box polypeptide 47                                          | DDX47            | 6               | F: GCTTTGCTACTCCGAAATCTT<br>R: ACATCAGTTGCCAGAAGAATG     | ~651 | 1.5 | 50 |                                             |          |
| desmin                                                           | DES              | 6               | F: GCAGCCAACAAGAACAATGA<br>R: CCTTGAGGGCGTCGATCT         | 103  | 1.5 | 58 | Wagner et al. 2006                          |          |
| diacylglycerol kinase, alpha 80kDa                               | DGKA             | 6               | F: TCGCTCCTCCAATTTCTTTG<br>R: ATGTGTTTGTGGGGTGTGTG       | 239  | 1.5 | 60 |                                             |          |
| DnaJ homolog, subfamily C, member 14                             | DNAJC14          | <b>6q22-q23</b> | F: CTTCTTTGCAGCTCCTCAGC<br>R: TGCTGTACACAGCCCTTTTG       | 183  | 1.5 | 60 |                                             |          |
| eukaryotic translation initiation factor 4B                      | EIF4B            | 6               | F: ATCAGTGCAGTGCCTTTACC<br>R: AGGGCACTGAGCAAGGAAT        | 101  | 1.5 | 58 |                                             |          |
| v-erb-a erythroblastic leukemia viral oncogene homolog 4 (avian) | ERBB4 (AC092680) | 6               | F: AGAACCCCTCCCATTGAATC<br>R: GCACATCTTCTCCCTTCTTTTG     | 584  | 1.5 | 62 | Wagner et al. 2006                          | AJ584440 |
| FK506 binding protein 4, 59kDa                                   | FKBP4            | 6               | F: CGAGTTTCTCTGATGAGGATG<br>R: GTGCCAAGTCAAAGTCATTCA     | ~746 | 1.5 | 58 |                                             | CX602041 |
| fibronectin 1                                                    | FN1              | 6p15            | AGGCTGCACATTCAGTTCC<br>R: GGAAAATCGGCAATTCGTAG           | 196  | 2.0 | 58 | Mariat et al. 2001* ; Chowdhary et al. 2003 | AF130764 |
| GABA(A) receptor-associated protein like 1                       | GABARAPL1        | 6               | F: GGGCAGGTATGAGGTAGGATA<br>R: CTTGGCCTGACAGCATAAACT     | 387  | 2.0 | 58 |                                             | BI961792 |
| guanine nucleotide binding protein, beta polypeptide 3           | GNB3             | <b>6q13</b>     | F: CTCTGTAGCCAGGGCAGTGT<br>R: GGAGGCTGTCACAGAAAAGC       | 173  | 1.5 | 66 |                                             |          |
| glucosamine (N-acetyl)-6-sulfatase                               | GNS              | 6               | F: TTTGTAGAAGTCTATAACCTGACTGC<br>R: GGTCAAAAACCCCTGGAGTG | 184  | 1.5 | 58 |                                             |          |
| histone deacetylase 4                                            | HDAC4            | 6p12            | F: GTACGAGCGGCATGTCTTTAT<br>R: TCAGTAAGACGCAAACGTTCC     | 195  | 1.5 | 55 | Perrocheau et al. 2005*                     | AY817472 |

|                                                        |              |             |                                                                 |          |     |    |                                              |          |
|--------------------------------------------------------|--------------|-------------|-----------------------------------------------------------------|----------|-----|----|----------------------------------------------|----------|
| high density lipoprotein binding protein               | HDLBP        | <b>6p12</b> | F: ACCCACAGAGTCAACTACAC<br>R: TTTTCCTGCTTTGGCTGC                | 124      | 1.5 | 58 |                                              |          |
| microsatellite                                         | HTG31        | 6           | F: CTCTGTAACCCCTTATATCCTTA<br>R: TGTTGATTGCTCCTCCCCCT           | 162      | 2.0 | 58 | Lindgren et al. 1999                         |          |
| interferon, gamma                                      | IFNG         | 6q23-q24    | F: TGGGGAATATATTTTTAAACTCATCA<br>R: CGGCTACCCACTCCCTAGTT        | 203      | 2.0 | 58 | Chowdhary et al. 2003; Musilova et al. 2005* | AF130766 |
| insulin-like growth factor binding protein 6           | IGFBP6       | <b>6q22</b> | F: CCGCAGACATCTGGACTCAG<br>R: GTAGAAGCCCCGATGGTCAC              | 100      | 1.5 | 58 |                                              |          |
| Indian hedgehog homolog (Drosophila)                   | IHH          | 6           | F: AGCTGTGAGGCCAGGAGAC<br>R: CGCTGGTTCTGAGTGATTGTT              | 199      | 1.5 | 55 | Perrocheau et al. 2006                       | DX010636 |
| inhibin, alpha                                         | INHA         | 6p14        | F: GCAGCATTGTGCTTGCATC<br>R: GAGAAGTGGAAGGAAGAGGG               | 121      | 1.5 | 60 | Mariat et al. 2001* ; Wagner et al. 2006     | D50327   |
| insulin receptor substrate 1                           | IRS1         | 6           | F: GTGAGTCCTAGCACCAACAGG<br>R: GGAACCAGACACAGAAGCACT            | 219      | 1.5 | 55 | Perrocheau et al. 2006                       | DX010515 |
| killer cell lectin-like receptor subfamily A, member 1 | KLRA1 (LY49) | 6q13        | F: CAGGAGGAAATTCTACAAAACC<br>R: AAAGATCCCCTGTTTTTCGAT           | ~200     | 1.5 | 55 | Takahashi et al. 2004*                       | AB120393 |
| v-Ki-ras2 Kirsten rat sarcoma viral oncogene homolog   | KRAS         | 6           | F: GTGGAAGTGGAACCTTTTGGATAAAA<br>R: CAGCATTGAGAAATTAACAGCATACAA | 284      | 2.0 | 58 |                                              |          |
| lactate dehydrogenase B                                | LDHB         | 6           | F: CCTGGAAACTAAGTGGATTACCC<br>R: CTTGAGTCGCCATGCTCTC            | 151      | 1.5 | 58 |                                              |          |
| LEM domain containing 3                                | LEMD3 (MAN1) | 6           | F: AAGACTACTTTCGCCACC<br>R: AGTTCCTTATGGGCTACTG                 | 209      | 3.0 | 58 | Chowdhary et al. 2003                        |          |
| microsatellite                                         | LEX065       | 6           | F: GAAGGCACAATTCAATCTACT<br>R: GCCCAGTCCCATTCTAAC               | 144 -156 | 2.0 | 58 | Coogle & Bailey 1999                         |          |
| LIM domain and actin binding 1                         | LIMA1        | 6           | F: GAGAGACCTGCGTGGAATGT<br>R: TTGTTGCAATAGGAGCAACG              | 106      | 1.5 | 58 |                                              |          |
| leucine-rich repeats and immunoglobulin-like           | LRIG3        | 6           | F: TCACTTGAAAGCTCGTTCTTC<br>R: TGGTCCCATTCAGTCTATGTG            | 174      | 1.5 | 58 |                                              | CX594173 |

|                                                |          |                 |                                                         |          |     |      |                       |
|------------------------------------------------|----------|-----------------|---------------------------------------------------------|----------|-----|------|-----------------------|
| domains 3                                      |          |                 |                                                         |          |     |      |                       |
| Equine skeletal muscle EST                     | M6PR     | 6               | F: GTGGGCCAGGGTCAAGAG<br>R: ATTGAAGACGTGAGTCTCGTTGAGT   | 150      | 1.5 | 58   |                       |
| microtubule-associated protein 2               | MAP2     | 6               | F: TGTATGCTGGGATTCCAAGGT<br>R: TTTGCAAATTTTGATTGAAAAACA | 150      | 3.0 | 58   |                       |
| hypothetical protein MGC50559                  | MGC50559 | 6               | F: AAATTCTTACTAGGGTCAATGTCA<br>R: ATCCTGATGTTGTCAGAGGAA | 127      | 1.5 | 58   | DN506262              |
| matrix metalloproteinase 19                    | MMP19    | 6               | F: CTCAGGTCAGCTGGATGATG<br>R: GCACCTCTTGGAAGGTCAAG      | 460      | 1.5 | 60   |                       |
| myosin, light chain 1                          | MYL1     | 6               | F: GACCAGGGCAGCTATGAAGA<br>R: TGGCTAAGACATGACGGAGTT     | 100      | 1.5 | 58   | Wagner et al. 2006    |
| myosin, light chain 6                          | MYL6     | 6               | F: GTCTTGCTTTAGGGTGGTCC<br>R: ACACAGCAGAGGCAGAAAAGT     | 214      | 2.0 | 25   | BI961490              |
| nucleolin                                      | NCL      | 6               | F: TGCAGAGAAAACCTTGGAAGA<br>R: CCAAGTGCTATTCTTTCCACCT   | 121      | 1.5 | 58   |                       |
| NADH dehydrogenase 1 alpha subcomplex, 10      | NDUFA10  | 6               | F: GACAGAACGCAGCAAAGTGA<br>R: TGGCGTACAACCAGGACT        | 1013     | 1.5 | TD62 |                       |
| ninjurin 2                                     | NINJ2    | <b>6q12-q13</b> | F: AGAAGAGCGTGGCAGAGAG<br>R: CAGAGAGATGCTGATGAGAGTG     | 134      | 1.5 | 56   | CX596080              |
| nucleoporin 107kDa                             | NUP107   | 6               | F: AAAAAGCATGAAGCTGCAAAA<br>R: AAGCTCTAATGCACAGATGTTCTC | 151      | 1.5 | 58   |                       |
| microsatellite                                 | NVHEQ081 | 6               | F: TTCTGGATGAAGTGCAGCC<br>R: GGACAGTGGAGGTGGAGGATA      | 166 -181 | 2.0 | 58   | Bjornstad et. al 1999 |
| microsatellite                                 | NVHEQ082 | 6               | F: TGTGGCAGCATCCCACAAAC<br>R: CCTCCATTTTTGTCGGTTAGCG    | 127-141  | 2.0 | 58   | Bjornstad et al. 2000 |
| ORM1-like 2 (S. cerevisiae)                    | ORMDL2   | 6               | F: TGGCGTACACCATCTTGGTGTA<br>R: TTGTTTTTGTTGGGAAAGG     | 160      | 1.5 | 58   |                       |
| poly (ADP-ribose) polymerase family, member 11 | PARP11   | 6               | F: CTATTTTGCTAGAGATGCTGCTT<br>R: GCTGCAAGCTCACACCAT     | 95       | 1.5 | 54   | DN504980              |
| paired box gene 3                              | PAX3     | 6               | F: GTTATTTTGCCCCGGTTTCT<br>R: AAGAGGAGCCCACCTGATTT      | 187      | 2.0 | 58   | Chowdhary et al. 2003 |

|                                                              |               |          |                                                        |       |     |      |                        |          |
|--------------------------------------------------------------|---------------|----------|--------------------------------------------------------|-------|-----|------|------------------------|----------|
| phosphofructokinase, muscle                                  | PFKM          | 6        | F: TCTCCACCTACCATTACGG<br>R: GGCCCATTCCTTTCTTTTC       | 204   | 2.0 | 58   | Chowdhary et al. 2003  | AF134231 |
| phospholipase C, delta 4                                     | PLCD4         | 6        | F: CCGAGGTCCATACCAAGAA<br>R: GATGAAAGGAGGCTGGTCT       | 378   | 1.5 | TD58 |                        |          |
| protein phosphatase 1, regulatory (inhibitor) subunit 7      | PPP1R7        | 6        | F: AACCTGGAGACGGTGTACCT<br>R: TTGGGTTTGTGACTGTTGCTA    | ~ 230 | 1.5 | 58   |                        |          |
| prickle homolog 1 (Drosophila)                               | PRICKLE1      | 6        | F: CAGCCACTGTTTGATGTCCT<br>R: CGTACTCCTCCAAAGCACAG     | 153   | 1.5 | 58   |                        | CX603902 |
| protein kinase, AMP-activated, gamma 1 non-catalytic subunit | PRKAG1        | 6q22     | F: AGCAGAGGTAGGGAGGCCA<br>R: AGCAACAAGGGAGAAAGCGA      | 137   | 1.5 | 60   | Dranchak et al. 2006*  |          |
| protein kinase, AMP-activated, gamma 3 non-catalytic subunit | PRKAG3        | 6p14-p13 | F: CAAGCTCTTGGTGTCCACAG<br>R: AAGAATCAGAGGCAACAATTTCG  | 169   | 1.5 | 60   | Dranchak et al. 2006*  |          |
| proline rich 13                                              | PRR13         | 6        | F: CCTGTACCTTGTGTCAGTGG<br>R: CAAATGGACCCCACTTTCC      | 116   | 1.5 | 58   |                        | BI961720 |
| prostaglandin E synthase 3                                   | PTGES3        | 6        | F: TTGATCTTTTTACAGTATTGATCC<br>R: CATGACTGGCCAGATTCTCC | 1000  | 1.5 | 58   |                        |          |
| parathyroid hormone-like hormone                             | PTHLH (PTHrP) | 6        | F: CACAGCGGAAATCAGAGCTAC<br>R: AGTTCGCCGTTTCTTCTTCTC   | 226   | 1.5 | 55   | Perrocheau et al. 2006 | DX010565 |
| RAP1B, member of RAS oncogene family                         | RAP1B         | 6        | F: CACAAGGCCTGAGTTGCAGTA<br>R: GGCCACCTCAAAGGAGTTGTA   | 119   | 2.0 | 62   |                        | BI961717 |
| RAS-like, estrogen-regulated, growth inhibitor               | RERG          | 6        | F: GTCAAGCAAGCCATTAACAAG<br>R : CAGACATTTCCAGAGTCAGA   | 186   | 1.5 | 58   |                        | CX598283 |
| microsatellite                                               | RKJ06         | 6q22     | F: GTGGCTAGGAAAAGTTAGCG<br>R: CAAGTCATACGCAATGTTTAG    | 225   | 3.0 | 58   | Chowdhary et al. 2003* |          |
| ring finger protein 25                                       | RNF25         | 6        | F: CCTTTGGAACCCGAGTCAAC<br>R: TGGCAGTTCCTGGGTATCAGT    | 309   | 2.0 | 52   | Wagner et al. 2006     | BI961897 |
| secretogranin II                                             | SCG2 (SGII)   | 6p13-p12 | F: CAACTCTCAGATGATGTCTCC<br>R: CCTAATTCTTGATCCTTGTC    | 600   | 1.5 | 60   | Milenkovic et al. 2002 |          |
| sodium channel, voltage gated, type VIII, alpha              | SCN8A         | 6q22     | F: GCCCATTGAGCACTTCTACG<br>R: TTCCTTTTACTGGATACGGTCTT  | 174   | 2.5 | 50   |                        |          |



|                                                                                                             |                           |      |                                                           |         |     |    |                                                    |          |
|-------------------------------------------------------------------------------------------------------------|---------------------------|------|-----------------------------------------------------------|---------|-----|----|----------------------------------------------------|----------|
| subunit                                                                                                     |                           |      |                                                           |         |     |    |                                                    |          |
| splicing factor,<br>arginine/serine-rich 2,<br>interacting protein                                          | SFRS2IP                   | 6    | F: CTCGGTGGAAGGAAAGATG<br>R: TGTCAGCAGAATTTGGATCAT        | 153     | 1.5 | 58 |                                                    |          |
| silver homolog (mouse)                                                                                      | SILV<br>( <i>PMEL17</i> ) | 6q23 | F: AGTACCGGGACCCTGATCTC<br>R: CTGCAGTAGGCACTTGTCCA        | 199     | 2.0 | 58 | Rieder et al<br>1999.;<br>Chowdhary<br>et al. 2003 | AF076780 |
| solute carrier family 38,<br>member 2                                                                       | SLC38A2                   | 6    | F: GCTTTAAGAGCACATTTATTGTATGTT<br>R: CCTTAGAGCCAGATGACCAA | 167     | 1.5 | 58 |                                                    |          |
| SWI/SNF related, matrix<br>associated, actin<br>dependent regulator of<br>chromatin, subfamily a-<br>like 1 | SMARCAL1                  | 6    | F: CGCTGCCTTCCGCAAGTTCG<br>R: GGGGTCCACTCCAGAAAGGTCG      | 132     | 1.5 | 58 | Wagner et al.<br>2006                              | BM414611 |
| sarcospan                                                                                                   | SSPN                      | 6    | F: CCTTTGTGTACCAGGATGTGA<br>R: CGGAAGTTGTTAGGGAGCATA      | 186     | 1.5 | 58 |                                                    | CX605718 |
| SH3 and cysteine rich<br>domain 3                                                                           | STAC3                     | 6    | F: GCTGAAGCGGTTATTCAGGA<br>R: GTGGCTCCTCCTCCTCTTCT        | 155     | 1.5 | 58 |                                                    |          |
| signal transducer and<br>activator of transcription<br>6                                                    | STAT6                     | 6    | F: CCTGTGTGACAACCCAAG<br>R: CACAGCCACATAGACCCT            | 140     | 2.0 | 58 |                                                    | BI961587 |
| microsatellite                                                                                              | TKY025                    | 6    | F: AATCTCATGGCAGAATACCG<br>R: GACTCTGGGAAGGGCTAAGG        | 100     | 1.5 | 58 | Kakoi et al.<br>2000                               | AB048335 |
| microsatellite                                                                                              | TKY026                    | 6    | F: AACGCATGCAATTGGCCCAG<br>R: TGCTGTTGCTGCTGGATTGC        | 100-103 | 1.5 | 58 | Kakoi et al.<br>2000                               | AB048335 |
| microsatellite                                                                                              | TKY027                    | 6    | F: TACTTGGTCCAGCAGCTGTC<br>R: TCAGAAGCACCTGTCTGTGC        | 160     | 1.5 | 58 | Kakoi et al.<br>2000                               | AB048335 |
| microsatellite                                                                                              | TKY028                    | 6    | F: TTCAGCAGGGTCTCATGCCAC<br>R: TTCGGCTCTGGTTCAAGAGG       | 276-357 | 1.5 | 58 | Kakoi et al.<br>2000                               | AB048335 |
| microsatellite                                                                                              | TKY029                    | 6    | F: CTCTTGAACCAGAGCCGAAC<br>R: TAGAAAAGCGTTGCAGAGGC        | 121-127 | 1.5 | 58 | Kakoi et al.<br>2000                               | AB048335 |
| microsatellite                                                                                              | TKY030                    | 6    | F: CCAGTCCACTGCCCACCCAC<br>R: GTGCATGGTGGGAGCTACTG        | 193     | 2.0 | 58 | Kakoi et al.<br>2001                               | AB048336 |

|                |                  |   |                                                           |         |     |    |                     |          |
|----------------|------------------|---|-----------------------------------------------------------|---------|-----|----|---------------------|----------|
| microsatellite | TKY111<br>(RC11) | 6 | F: TATGGCGATTTCTGGTCTGTGTC<br>R: GATGACAACACTGGGAAGAAAGAG | 125-131 | 2.0 | 58 | Mashima et al. 2001 | AB053346 |
| microsatellite | TKY284           | 6 | F: CTGGACTAGAGTCAGATTGC<br>R: AACAGGATCCCCCAATGCC         | 159-175 | 2.0 | 58 | Tozaki et al. 2000b | AB033935 |
| microsatellite | TKY312           | 6 | F: AACCTGGGTTTCTGTTGTTG<br>R: GATCCTTCTTTTATGGCTG         | 251-270 | 1.5 | 58 | Tozaki et al. 2000c | AB034621 |
| microsatellite | TKY323           | 6 | F: CGGAAAGCTAAGAAGACTGG<br>R: AAATTGGCAAGTTTTTCCCC        | 130-141 | 1.5 | 58 | Tozaki et al. 2000c | AB034631 |
| microsatellite | TKY360           | 6 | F: CGTGATATGCACGAGATGTC<br>R: GATCAGTTCAGAATCAGCTG        | 236-240 | 1.5 | 58 | Tozaki et al. 2001  | AB044860 |
| microsatellite | TKY377           | 6 | F: GTTTACATAGTGTCCTACTTG<br>R: TGGTAATGGGGAAATTACTC       | 134-140 | 1.5 | 52 | Tozaki et al. 2001  | AB044877 |
| microsatellite | TKY411           | 6 | F: AGGACCTGATTCCCTAACATG<br>R: CTGTGGGCCACTTTGAAAAG       | 134     | 2.0 | 58 |                     | AB103629 |
| microsatellite | TKY412           | 6 | F: GTGTGGGACAGGAAGTTTGG<br>R: ATTCTTGGGTCCCCTCATCT        | 234-248 | 1.5 | 55 | Tozaki et al. 2004  | AB103630 |
| microsatellite | TKY543           | 6 | F: AGGAAAGCGGTGTGGTACAG<br>R: CACACAAGACGGACGAATGT        | 263-267 | 1.5 | 58 | Tozaki et al. 2004  | AB103761 |
| microsatellite | TKY556           | 6 | F: GCAGAGGGTGAAGCCAGTAA<br>R: TAATTCCTGCTTGTCGCAA         | 202-250 | 1.5 | 58 | Tozaki et al. 2004  | AB103774 |
| microsatellite | TKY570           | 6 | F: TCTCCGCAGCTCAAACCTTC<br>R: CTCAAAGGTGCCTGAGAAGC        | 159-177 | 1.5 | 58 | Tozaki et al. 2004  | AB103788 |
| microsatellite | TKY595           | 6 | F: GCAGAAGCCACTTCCTCAGA<br>R: AGGCAGCAAGCTTGTGAAAT        | 187-193 | 1.5 | 58 | Tozaki et al. 2004  | AB103813 |
| microsatellite | TKY723           | 6 | F: AAGAAGTCAAGGGGAGTTGGA<br>R: GGGGTTTCTTCTCAGCATCA       | 146-152 | 1.5 | 58 | Tozaki et al. 2004  | AB103941 |
| microsatellite | TKY744           | 6 | F: CCTGCCTTTGCTCTAGAAACC<br>R: GGCTCCCAAGGGACTAGAAG       | 251-259 | 2.0 | 54 | Tozaki et al. 2004  | AB103962 |
| microsatellite | TKY829           | 6 | F: ATCTATAAAAAGCCTGGGCA<br>R: TAGCCAGGTCTCACTTTATG        | 160     | 2.0 | 58 |                     | AB104047 |
| microsatellite | TKY843           | 6 | F: GCAGCACCCACAGAAAATA<br>R: TTGGCAACTCCATGCAAATA         | 163     | 1.5 | 58 |                     | AB104061 |

|                |         |   |                                                      |     |     |    |                       |          |
|----------------|---------|---|------------------------------------------------------|-----|-----|----|-----------------------|----------|
| microsatellite | TKY863  | 6 | F: ACATACAGGCCATTTGATGG<br>R: CTCATCAAGCCATGCTGTGA   | 198 | 2.0 | 58 |                       | AB104081 |
| microsatellite | TKY952  | 6 | F: GATCGGTAAGTGTCGGGAC<br>R: TAAAATGACTGGGTGGAGAC    | 216 | 1.5 | 62 | Tozaki et al.<br>2004 | AB104170 |
| microsatellite | TKY1001 | 6 | F: TCTCAGAAGCCATCTGGAG<br>R: ATCGATGCAGAACACGTGG     | 252 | 2.0 | 58 | Tozaki et al.<br>2004 | AB104219 |
| microsatellite | TKY1013 | 6 | F: TACCCGCTATTCCAGACTC<br>R: AGAGACCTGACCCTTACTC     | 188 | 2.0 | 58 |                       | AB104231 |
| microsatellite | TKY1087 | 6 | F: ACCAGCAATGAAGGACTATC<br>R: AGCAGAAGACTTTGGGAAC    | 196 | 2.0 | 58 | Tozaki et al.<br>2004 | AB104305 |
| microsatellite | TKY1090 | 6 | F: CATCCCAGGGACAAACATC<br>R: CAGGGACAATCTTAGACAAAC   | 174 | 2.0 | 58 | Wagner et al.<br>2006 | AB104308 |
| microsatellite | TKY1113 | 6 | F: GATCAGAGGGAGGAAAGAG<br>R: AAGAGATGAACAGAATCAGTG   | 206 | 2.0 | 58 |                       | AB104331 |
| microsatellite | TKY1159 | 6 | F: TAATGTCCTCAAGGTCCATC<br>R: AACCTGAGTATCCACTGATG   | 188 | 2.0 | 58 |                       | AB104377 |
| microsatellite | TKY1162 | 6 | F: TTTAATTATCACTCCCTTGACA<br>R: TGACTCTGGTTTCTGACTTC | 123 | 2.0 | 58 |                       | AB104380 |
| microsatellite | TKY1235 | 6 | F: CACTGTTTCTGCCAAAATC<br>R: CCTATAGCTGAATACTCTCC    | 134 | 1.5 | 60 | Tozaki et al.<br>2007 | AB215178 |
| microsatellite | TKY1433 | 6 | F: ATTTCCTTAGGAAGTAGACC<br>R: ATGAGCAAAGTTAGCACTTG   | 172 | 1.5 | 58 | Tozaki et al.<br>2007 | AB215376 |
| microsatellite | TKY1474 | 6 | F: CTTCAGTCAGTCTCCTGAG<br>R: TTAAACTGCTGTTGCCAGC     | 147 | 1.5 | 56 | Tozaki et al.<br>2007 | AB215417 |
| microsatellite | TKY1613 | 6 | F: GTTCAGATGTTTGGAGGATG<br>R: GATTTATCCCCTGATACAGA   | 262 | 1.5 | 58 | Tozaki et al.<br>2007 | AB215556 |
| microsatellite | TKY1745 | 6 | F: AGGTAGACCAATCAGTTAGA<br>R: TCTGAAAGTGACAAAGCTGC   | 226 | 1.5 | 58 | Tozaki et al.<br>2007 | AB215688 |
| microsatellite | TKY1892 | 6 | F: TAATTTATCTAGCTCCCTGC<br>R: AGATTCTCAAAGCCATCAGA   | 129 | 1.5 | 58 | Tozaki et al.<br>2007 | AB215835 |
| microsatellite | TKY2582 | 6 | F: CTGATTCCAGCTACAGGACAA<br>R: GAATGGCATGGACAGTAGGT  | 232 | 1.5 | 58 | Tozaki et al.<br>2007 | AB216525 |

|                                                            |                   |             |                                                         |         |     |    |                                            |          |
|------------------------------------------------------------|-------------------|-------------|---------------------------------------------------------|---------|-----|----|--------------------------------------------|----------|
| microsatellite                                             | TKY2815           | 6           | F: TCCGTGCATCTGGTGATAG<br>R: ATTTAGGCTTTTCCCCTCCT       | 247     | 1.5 | 58 | Tozaki et al. 2007                         | AB216758 |
| microsatellite                                             | TKY3193           | 6           | F: CTAATCACTCATGGTGGTG<br>R: GATCAGATTCTCCTTGAAAGAA     | 218     | 1.5 | 56 | Tozaki et al. 2007                         | AB217136 |
| microsatellite                                             | TKY3278           | 6           | F: CCTGGTTTTACTTGGCAGTG<br>R: ACATACTTAGCTCTGGAAAACACA  | 240     | 1.5 | 58 | Tozaki et al. 2007                         | AB217221 |
| transmembrane 7<br>superfamily member 3                    | TM7SF3            | 6           | F: CGTTGCAGATTCTGAAGAGAA<br>R: TGGGTAAATCGGCCATAGAG     | 154     | 1.5 | 58 |                                            |          |
| transmembrane protein 4                                    | TMEM4             | 6q23        | F: CCTCACAGAGCTGCTAGAGGA<br>R: AACTTGAGGGTGCCACTGAT     | 174     | 1.5 | 55 | Perrocheau et al. 2006*                    | DX010598 |
| triosephosphate<br>isomerase 1                             | TPI1              | 6           | F: AGAAGGTCGTTTTCGAGCAA<br>R: CCAGCAAGGGGATTAAGTCA      | 120     | 1.5 | 61 | Chowdhary et al. 2003                      |          |
| tetraspanin 8                                              | TSPAN8            | <b>6q24</b> | F: CTCCGCAGACAAATTACTCC<br>R: TATGCAGCCACTCACACCT       | 111     | 1.5 | 56 |                                            |          |
| microsatellite                                             | UCDEQ465          | 6           | F: AACCAGTCCCTACATAGAAC<br>R: CTCACAACCAAGCATACA        | 200-206 | 2.0 | 58 | Eggleston-Stott et al. 1999                | U67414   |
| UDP<br>glucuronosyltransferase<br>1 family, polypeptide A1 | UGT1A1<br>(HMS70) | 6p12        | F: CATCATGCGCCTCTCCAGCC<br>R: CTGGTACCAGTGTAGGTCGTGGG   | ~140    | 1.5 | 65 | Mariat et al. 2001*;<br>Wagner et al. 2006 |          |
| microsatellite                                             | UM015             | 6           | F: AGTCTGGCTGAGGATACTG<br>R: GGTGAGAAAGGAGATAAATG       | 153-163 | 3.0 | 58 | Meyer et al. 1997                          | AF195133 |
| microsatellite                                             | UMNe087           | 6           | F: CCTCCAAATTCCTTCCCTTTTAG<br>R: GCTCACTTTAGCCATGTCAAGC | 146     | 1.5 | 62 | Wagner et al. 2006                         | AF536243 |
| microsatellite                                             | UMNe177           | 6           | F: GCTGGGACATAAAATTTTCATCC<br>R: GTCTGTCTTTTTCATCTAGGCC | 162     | 2.0 | 58 | Mickelson et al. 2003                      | AF536276 |
| microsatellite                                             | UMNe195           | 6           | F: CAAAGAAGTGGCCCTCGTAG<br>R: GATCTGGCCCCAGAGAAAAA      | ~550    | 1.5 | 55 | Wagner et al. 2004a                        | AY391318 |
| microsatellite                                             | UMNe197           | 6           | F: CTGGTTGAAGCTTGTTTCTCTC<br>R: CCGCTTGTCCAGTGACATAG    | 188     | 2.0 | 58 | Mickelson et al. 2003                      | AF536282 |
| microsatellite                                             | UMNe203           | 6           | F: GTAACAAAGCCCCTAATTGCC<br>R: TGAGCCAACACAACACTTCTG    | 131     | 2.0 | 62 | Mickelson et al. 2003                      | AF536286 |

|                                    |                 |                  |                                                          |      |     |    |                                            |          |
|------------------------------------|-----------------|------------------|----------------------------------------------------------|------|-----|----|--------------------------------------------|----------|
| microsatellite                     | UMNe216         | 6                | F: CTAGGCTGCCACTTGGAGAG<br>R: ACATACATAGACACACAGGCGC     | 101  | 2.0 | 55 | Mickelson et al. 2003                      | AF536297 |
| microsatellite                     | UMNe233         | 6                | F: AGAACAGTACATGCTGTGGTCC<br>R: CTGTGAACCGTCTCATGAGTG    | 141  | 2.0 | 58 | Mickelson et al. 2003                      | AF536305 |
| microsatellite                     | UMNe248         | 6                | F: GATAATGCCTCTTGCTCTCCC<br>R: AAGATGAAGAGAGGTTAGCCTAGTG | 110  | 2.0 | 58 | Mickelson et al. 2003                      | AF536316 |
| microsatellite                     | UMNe337         | 6                | F: CTTTAATATGCCTGCCACTTCC<br>R: TTGGGAAGTCCAGGATCTTG     | 215  | 2.0 | 55 | Wagner et al. 2004a                        | AY391342 |
| microsatellite                     | UMNe427         | 6                | F: GGAAGTGGAGACTCAGCAGG<br>R: TGCATAGACAACCTGCCTGG       | 128  | 1.5 | 58 | Wagner et al. 2004c                        | AY735247 |
| microsatellite                     | UMNe472         | 6                | F: TGAGTTGTTGTAGCGTGTTG<br>R: AGGCAGTGTGATAAATGTGGG      | ~300 | 1.5 | 60 | Wagner et al. 2004b                        | AY464496 |
| microsatellite                     | UMNe556         | 6                | F: CTAAATGAATGGAGGGAAGGC<br>R: TGACTCCAGCCAGAGGATG       | 325  | 1.5 | 62 | Wagner et al. 2004c                        | AY735269 |
| ubiquitin specific<br>peptidase 15 | USP15           | 6                | F: GCACATTTCCCGTATCGACT<br>R: AAGCAAAGCCATGATCAACA       | 245  | 1.5 | 58 |                                            |          |
| vitamin D receptor                 | VDR             | <b>6q21.3-22</b> | F: AGGACCAGATCGTACTGCTGA<br>R: AGTCTTGTTGCCACAGGTC       | 264  | 1.5 | 56 |                                            |          |
| von Willebrand factor              | VWF<br>(HMS55)  | 6q12             | F: GCCATGTCTTGATGTGGTGG<br>R: TAATGGAATATCACCACCGG       | 180  | 2.0 | 58 | Godard et al. 2000*;<br>Mariat et al. 2001 |          |
| WNT inhibitory factor 1            | WIF1<br>(WIF-1) | 6                | F: AAGTACGTCTGTAGCGTGATGGT<br>R: TCTCTGGGATCAGGAGAAAGTC  | 344  | 3.0 | 58 | Chowdhary et al. 2003                      | G62206   |
| YY1 associated factor 2            | YAF2            | 6q21.2-q21.3     | F: GCCAAGATTGAAAAATGTGGA<br>R: GTGAAGACGACCTGGACATTC     | 197  | 1.5 | 55 | Perrocheau et al. 2006*                    | DX010659 |

| Name                                                  | Symbol | Horse chr.      | Primers                                                    | Product size (bp) | MgCl <sub>2</sub> (mM) | T <sub>a</sub> | Reference                                          | Accession No |
|-------------------------------------------------------|--------|-----------------|------------------------------------------------------------|-------------------|------------------------|----------------|----------------------------------------------------|--------------|
| microsatellite                                        | 7CA001 | 7               | F: CGATGTGGATGTGCATGAGT<br>R: GGTGGGTGTGCTGTAATGCT         | 154               | 1.5                    | 58             |                                                    | AY820149     |
| sequence tagged site                                  | 7STS01 | 7               | F: TGTCACCACAGTCATTTGC<br>R: GAGGAAACAGTGACTTCATTACC       | 562               | 1.5                    | TD51           |                                                    | CF722812     |
| sequence tagged site                                  | 7STS02 | <b>7q14-q15</b> | F: CACCCAGTGTAATCAACCCAG<br>R: GCCTGTCAGTTCCTTTAATAC       | 155               | 1.5                    | 56             |                                                    |              |
| ATP-binding cassette, sub-family C, member 8          | ABCC8  | <b>7q17-q18</b> | F: ACTGAAGCGGAGAGCTACGA<br>R: TCTGGATCTTGCTTGGTCT          | 202               | 1.5                    | 64             |                                                    |              |
| acid phosphatase 5, tartrate resistant microsatellite | ACP5   | 7q12            | F: CTGGTCTTGAACAGGGACTTG<br>R: AGAACGGCATAGGCTTTGTG        | 205               | 1.5                    | 55             | Perrocheau et al. 2006                             | DX010426     |
|                                                       | AHT019 | <b>7q17-q18</b> | F: CATTTCTCTGGTGTATCTCCCA<br>R: GGAATAGTCATAGTCCACGACC     | 137-145           | 2.0                    | 58             | Swinburne et al. 1997                              |              |
| apolipoprotein A-IV                                   | APOA4  | 7p15            | F: TCTTCAGCACTCTCAAGGAGGAGA<br>R: CACGTGTCCTCAAGCTCATACAAG | 198               | 1.5                    | 58             | Lear et al. 2001*                                  |              |
| apolipoprotein C-III                                  | APOC3  | 7p14 (TAMU)     | F: CAGCTATCTGCCTGGAGGAC<br>R: ATGCTGGTCAGCGTATCCTT         | 217               | 2.0                    | 58             | Shubitowski et al. 2001;<br>Chowdhary et al. 2003* | AY008771     |
| brain-derived neurotrophic factor                     | BDNF   | 7               | F: AGGCTCGAGAGGCCTGAC<br>R: GCTTCAGCTGGCCTTTTCGAC          | 382               | 2.0                    | 64             | Momozawa et al. 2007                               |              |
| baculoviral IAP repeat-containing 2                   | BIRC2  | 7p15            | F: CCATTTTCAGGGCACATCTTT<br>R: GATGGCCATGGGATATCAAC        | 248               | 1.5                    | 58             | Brinkmeyer-Langford et al. 2005*                   |              |
| baculoviral IAP repeat-containing 3                   | BIRC3  | 7p16-p15        | F: CCGGAAGAATAGAATGGCACT<br>R: TGAATATGGTGGCTGCAAAAT       | 191               | 1.5                    | 55             | Perrocheau et al. 2006                             | DX010440     |
| complement component 3                                | C3     | 7p16            | F: CCACCCCTCTCTTCTCATTTG<br>R: ATCTGGCTTCTGCTTCTGGA        | 200               | 2.0                    | 58             | Millon et al. 1993*;<br>Caetano et al. 1999        | AF097579     |

|                                                                                  |                                           |                             |                                                          |          |     |    |                                            |          |
|----------------------------------------------------------------------------------|-------------------------------------------|-----------------------------|----------------------------------------------------------|----------|-----|----|--------------------------------------------|----------|
| chromosome 19<br>open reading frame<br>19                                        | C19orf19                                  | 7                           | F: GCCTACAGCCCAGAGAAAGT<br>R: CTGCTGGGCTTGATGAAGAT       | 164      | 1.5 | 58 | Brinkmeyer-<br>Langford et al.<br>2005     | BF080172 |
| cell adhesion<br>molecule 1                                                      | CADM1<br>( <i>IGSF4</i> ,<br><i>IGL</i> ) | <b>7p13-p12</b>             | F: CAGGGTAACCAGCAAGAAGG<br>R: CTGCCCTAGGAGAGGGAGAG       | 135      | 2.0 | 58 | Home et al.<br>1992, Mariat<br>et al. 2001 | L07573   |
| ClpB caseinolytic<br>peptidase B<br>homolog (E. coli)                            | CLPB<br>( <i>SKD3</i> )                   | <b>7q14-q15</b>             | F: TCCTTCTTCAGCTGCTTAGGTC<br>R: GGTCTCGGTACGTCCTCTCTG    | 194      | 1.5 | 55 | Perrocheau et<br>al. 2006                  | DX010582 |
| microsatellite                                                                   | COR004                                    | 7                           | F: GAGTGTGACGGAGGACGA<br>R: AGGGAGCAAACGCAAGAC           | 292-312  | 3.0 | 58 | Hopman et al.<br>1999                      | AF083447 |
| microsatellite                                                                   | COR095                                    | <b>7q13dist<sup>a</sup></b> | F: TACCTCTGGTGGTGATGCTT<br>R: CCCACACTTACTCCCATCAC       | 206- 216 | 2.0 | 58 | Tallmadge et<br>al. 1999b                  | AF154948 |
| microsatellite                                                                   | COR106                                    | 7                           | F: CTTCCACTTGTGTCTTCTCCC<br>R: GCAATCCTAACC AAACTCC      | 135-137  | 1.5 | 58 | Swinburne et<br>al. 2005                   |          |
| Paf1/RNA<br>polymerase II<br>complex<br>component,<br>homolog (S.<br>cerevisiae) | CTR9                                      | 7                           | F: CAAGTGTGGCAAGTTACAGG<br>R: GCTCCAGTTCTTTCACAGC        | 340      | 1.5 | 58 |                                            |          |
| defective in cullin<br>neddylation 1,<br>domain containing<br>5 (S. cerevisiae)  | DCUN1D5                                   | 7                           | F: TGCTTCAACTTTCAGCTCTGG<br>R: ACAAAGGGCCCTCAACAAAACCTTC | ~350     | 1.5 | 55 |                                            | BI395196 |
| dipeptidyl-<br>peptidase 9                                                       | DPP9                                      | 7                           | F: CCAAAGCACGTTTCTTG GTT<br>R: TATTCAGCGGTCACATCCTG      | 160      | 1.5 | 58 | Brinkmeyer-<br>Langford et al.<br>2005     |          |
| dopamine receptor<br>D2                                                          | DRD2                                      | 7                           | F: GATGTGCACAGCAAGCATTT<br>R: CCATGCATGCACATACACAC       | 207      | 2.0 | 58 | Chowdhary et<br>al. 2003                   | AF134061 |
| v-ets<br>erythroblastosis<br>virus E26<br>oncogene homolog<br>1 (avian)          | ETS1                                      | 7p14.3                      | F: AGTGGACAGAGACCCACGTT<br>R: CTTTCTGCAGGATCTCCAGGT      | 192      | 1.5 | 55 | Perrocheau et<br>al. 2005                  | AY817465 |

|                                 |                |              |                                                             |         |     |    |                                                    |                       |
|---------------------------------|----------------|--------------|-------------------------------------------------------------|---------|-----|----|----------------------------------------------------|-----------------------|
| hemoglobin, beta                | HBB            | 7q15         | F: CCTGGGCAGGTTAGTATCCA<br>R: ACCAGCAGCTTAAGGGGTTT          | 146     | 3.0 | 58 | Milenkovic et al. 2002* ;<br>Chowdhary et al. 2003 | AF134224              |
| Equine EST                      | HESTG07        | 7            | F: GGCAAAGTGTTTCATCTGTTTTTC<br>R: TACGACATATTCACCTTGGACAATG | ~200    | 1.5 | 58 |                                                    | AW735737              |
| microsatellite                  | HTG20          | 7            | F: CTGGTTTACCTTCCCTACAG<br>R: CCAATGGTTCCTCTGAGAAG          | 170     | 3.0 | 58 | Lindgren et al. 1999                               |                       |
| microsatellite                  | HTG33          | 7            | Lindgren pers comm.                                         | ~200    | 2.0 | 58 |                                                    |                       |
| 5-hydroxytryptamine receptor 3A | HTR3A          | 7p14.3-p14.1 | F: GCAATGACCCTGTCTCCCTG<br>R: AAATGCCCCGCTGTTGCCTG          | 296     | 1.5 | 65 | Prause et al. 2006*                                |                       |
| interleukin 18 binding protein  | IL18BP         | 7            | F: CTTCCATCACTTCAGCATCC<br>R: CGTGAAAACACAGGAGAAGC          | 268     | 1.5 | 58 |                                                    |                       |
| insulin receptor                | INSR           | 7p16         | F: CTGTGGGACTGGAGCAAACA<br>R: CCTCCATCTTGTGAATTCC           | 100     | 1.5 | 60 | Brinkmeyer-Langford et al. 2005*                   | BM255680              |
| lactate dehydrogenase A         | LDHA           | <b>7q18</b>  | F: TGCACACTCCAAGCTGGTTA<br>R: TGGATTGGAAACAACAAGCAA         | 160     | 1.5 | 58 |                                                    | CX603334              |
| microsatellite                  | LEX015/038     | 7            | F: GCATTCCCATCATCACAT<br>R: CCTGCCTTGCCTCTTTCT              | 132-145 | 2.0 | 50 | Coogle et al. 1996                                 | AF075617/<br>AF075640 |
| microsatellite                  | LEX045         | 7            | F: AATCGAAGGGCCGCAGAGTT<br>R: CCAAATGCCAGCCTCCTG            | 233-258 | 2.0 | 58 | Coogle et al. 1997                                 | AF075647              |
| Ion peptidase 1, mitochondrial  | LONP1 (PRSS15) | 7p16         | F: ACTGCTTGAGCTGCTGGA<br>R: TTGGCCGTGCAGATGAAC              | 180     | 2   | 60 | Brinkmeyer-Langford et al. 2005*                   | CK947971              |
| neural cell adhesion molecule 1 | NCAM1          | 7            | F: ACACACACACACGCACACAC<br>R: AAGTGAGTGGGCAACAAAGG          | 144     | 2.0 | 58 |                                                    | AF025992              |
| nuclear factor I/X              | NFIX           | 7q11-q12     | F: ATCAAGCAGAAGTGGGCATC<br>R: TCCCCGTCAGTACTTTCCAG          | 245     | 1.5 | 60 | Brinkmeyer-Langford et al. 2005*                   | AW659814              |



|                                                                  |                   |                 |                                                     |     |     |      |                                         |          |
|------------------------------------------------------------------|-------------------|-----------------|-----------------------------------------------------|-----|-----|------|-----------------------------------------|----------|
| nucleoporin 98kDa                                                | NUP98             | 7               | F: TACCTGAAGGGGTTCTTGGA<br>R: AAGGCCAAGGAAAAGGAAAA  | 178 | 1.5 | 58   |                                         |          |
| olfactomedin 2                                                   | OLFM2             | 7               | F: ACTTCATGGTGGACGAGAGC<br>R: GAGTTGGTGACGTAGAGCAC  | 185 | 1.5 | TD60 | Brinkmeyer-<br>Langford et al.<br>2005  | BF078883 |
| paired box gene 6                                                | PAX6              | 7q18            | F: GCCTAATTCAGGCCACAGAA<br>R: CATGAAATGTGGCAACCAAG  | 194 | 2.0 | 58   | Godard et al.<br>2000*                  | AY008800 |
| phosphodiesterase<br>4A, cAMP-specific                           | PDE4A             | 7               | F: CTCATGTACAACGACGAGTC<br>R: ACCCCTGAGCTGGTCACTTT  | 426 | 1.5 | 58   | Brinkmeyer-<br>Langford et al.<br>2005  | AV595552 |
| polymerase (RNA)<br>II (DNA directed)<br>polypeptide E,<br>25kDa | POLR2E            | 7               | F: CAGACGCTGGAGGAGTTCAA<br>R: CGGTGGGGTCGTCATTGT    | 106 | 1.5 | 55   | Brinkmeyer-<br>Langford et al.<br>2005  | CD471676 |
| polymerase (RNA)<br>mitochondrial<br>(DNA directed)              | POLRMT            | 7p16            | F: TGATGACCGTGGTGTACGG<br>R: CAGAGAACATCTCCTGGAGG   | 346 | 1.5 | 58   | Brinkmeyer-<br>Langford et al.<br>2005* | CF722762 |
| POU domain, class<br>2, transcription<br>factor 3                | POU2F3<br>(OCT11) | 7p14            | F: TGGGCTACCAGGATCTTCTTT<br>R: TGTGTGAAGCCAGCTTAATG | 168 | 1.5 | 55   | Perrocheau et<br>al. 2006*              | DX010425 |
| parathyroid<br>hormone                                           | PTH               | 7               | F: ACCTGGGCAAACATCTGAAC<br>R: TCCACATCAGCTTTGTCTGC  | 199 | 2.0 | 58   | Chowdhary et<br>al. 2003                | AF134233 |
| radixin                                                          | RDX               | 7               | F: ACGCCTAGCCACAATTCAG<br>R: ACTGGCATGAAGAACATAGGG  | 332 | 4.0 | 50   |                                         |          |
| ribosomal protein<br>S15                                         | RPS15             | 7               | F: CAACGGCAAGACCTTCAACC<br>R: TCACGGGCTTGTAGGTGATG  | 185 | 1.5 | 63   |                                         |          |
| microsatellite                                                   | SGCV28            | <b>7q14-q15</b> | F: CTGTGGCAGCTGTCATCTTGG<br>R: CCAATTCCAGCCCAGCTTGC | 157 | 1.5 | 58   | Godard et al.<br>1997                   | U90604   |
| SRY (sex<br>determining region<br>Y)-box 6                       | SOX6              | 7               | F: CAGCGTGAGTCCAGTTCTTG<br>R: GCTCATCTCCTGCCTACCTG  | 186 | 1.5 | 59   |                                         |          |
| thyroid hormone<br>responsive                                    | THRSP             | 7q15-q16        | F: AGCGCTACCCCAAGAACTG<br>R: GCCTTGAGCATGGTGAAGTAG  | 178 | 1.5 | 55   | Perrocheau et<br>al. 2006               | DX010595 |
| Thy-1 cell surface<br>antigen                                    | THY1              | 7               | F: GGGAGAGAGACCAGCACTCA<br>R: GCCCAGTTTTCTTGTGAGGA  | 202 | 2.0 | 58   | Chowdhary et<br>al. 2003                | AF134236 |

|                |        |                 |                                                       |           |     |    |                                         |          |
|----------------|--------|-----------------|-------------------------------------------------------|-----------|-----|----|-----------------------------------------|----------|
| microsatellite | TKY005 | <b>7p13-p12</b> | F: GTCAGAGTTCTCCAGAAAAGTC<br>R: ACAGATAGATATTCTCTCTAG | 107       | 2.0 | 60 | Hirota et al.<br>2001                   | AB048316 |
| microsatellite | TKY012 | 7p14.3          | F: GAAAAAGTGACACAACAGCTT<br>R: ACTAGAGGAATGAGATGTGT   | 88        | 2.0 | 58 | Hirota et al.<br>2001*                  | AB048323 |
| microsatellite | TKY034 | 7p14            | F: GCCACTGTAATGGTCTGAAG<br>R: GGAAGGTAGAGCATTCTCAG    | 160       | 2.0 | 55 | Hirota et al.<br>2001*                  | AB048340 |
| microsatellite | TKY035 | 7p14            | F: CCTTCCCCTCTCTCCAAAG<br>R: TTAGAGCTGTGCGATGTCAA     | 122       | 2.0 | 58 | Hirota et al.<br>2001*                  | AB048341 |
| microsatellite | TKY272 | 7               | F: CTTGAAGATTCAAGGTCATGG<br>R: ATATCATAGCAAATGGCAGG   | 100 - 116 | 2.0 | 58 | Tozaki et al.<br>2000b                  | AB033923 |
| microsatellite | TKY282 | 7               | F: TTACATCTCTGCACTCTCCC<br>R: GGTCTCATGCAAAACGCAGG    | 147-155   | 2.0 | 58 | Tozaki et al.<br>2000b                  | AB033933 |
| microsatellite | TKY283 | 7               | F: GGAAGTCATCTCTTTCCAGC<br>R: AATACATGATTCTCTGCCTGC   | 203 - 207 | 2.0 | 58 | Tozaki et al.<br>2000b                  | AB033934 |
| microsatellite | TKY338 | 7               | F: GGACTAGTTAAATCAGTGGG<br>R: ATGGGACTAGAACTCAGTTC    | 214-254   | 1.5 | 58 | Tozaki et al.<br>2001                   | AB044839 |
| microsatellite | TKY348 | 7               | F: AGATACATACACACGTGCCC<br>R: CCTGAAAGGTAACCACAAAG    | 108-128   | 1.5 | 56 | Tozaki et al.<br>2001                   | AB044849 |
| microsatellite | TKY380 | 7               | F: CCCTATTGTCCTTTATAGGTC<br>R: TTACGGCAAACACATTGGTG   | 119-131   | 1.5 | 50 | Tozaki et al.<br>2001                   | AB044880 |
| microsatellite | TKY461 | 7p14.1-p13      | F: ATGGCCCATCGTAAGAAACA<br>R: GAGGGAGGAAGAAAGGAAGG    | 162-168   | 1.5 | 58 | Brinkmeyer-<br>Langford et al.<br>2005* | AB103679 |
| microsatellite | TKY476 | 7               | F: GCATCTAGAAACTGTTCCAC<br>R: TCATTGCCAACTCTAGGTAC    | 230       | 2.0 | 58 |                                         | AB103694 |
| microsatellite | TKY506 | 7               | F: CTCCTTCATGCGTGAATCCT<br>R: CAGTGACAGAAAACAGGATGG   | 187-195   | 1.5 | 50 | Tozaki et al.<br>2004                   | AB103724 |
| microsatellite | TKY512 | 7               | F: CATTACAGTTGCTGTGGAG<br>R: GAATACCTACAGTACAGCGT     | 157       | 2.0 | 58 | Brinkmeyer-<br>Langford et al.<br>2005  | AB103730 |
| microsatellite | TKY574 | 7               | F: AGGAACATTGGCAAGAGATG<br>R: TGCAGTCTCTGTATTTGGAT    | 97        | 2.0 | 58 | Brinkmeyer-<br>Langford et al.<br>2005  | AB103792 |

|                |        |                 |                                                        |         |     |    |                                        |          |
|----------------|--------|-----------------|--------------------------------------------------------|---------|-----|----|----------------------------------------|----------|
| microsatellite | TKY588 | 7               | F: AGGCCACGGAGGATAGAAC<br>R: GTCTTCATTCTGGTACCAG       | 206     | 2.0 | 58 |                                        | AB103806 |
| microsatellite | TKY613 | 7               | F: CCAAGAAGGGCTGACTTCAC<br>R: GCCTAGACCTGGGGTCTTTC     | 244-250 | 1.5 | 58 | Tozaki et al.<br>2004                  | AB103831 |
| microsatellite | TKY618 | 7               | F: GTTTTCCATAATGGCTGCAC<br>R: GCAATTCCAATTAGTATCTCAGCA | 100-106 | 1.5 | 58 | Tozaki et al.<br>2004                  | AB103836 |
| microsatellite | TKY624 | 7               | F: GTGACAGGAAAGTAGAGGTC<br>R: GTTAGATACATACAGTCT       | 142     | 2.0 | 58 |                                        | AB103842 |
| microsatellite | TKY638 | 7               | F: CGAAATATAAGGATGGACACCTG<br>R: CCCATCTTCAACTCCTCCAA  | 131-151 | 1.5 | 58 | Tozaki et al.<br>2004                  | AB103856 |
| microsatellite | TKY690 | 7               | F: GCGGATCAGGATCAACTAGC<br>R: GGGCCCTGACAAGTTCCTAT     | 193-199 | 1.5 | 58 | Tozaki et al.<br>2004                  | AB103908 |
| microsatellite | TKY703 | 7               | F: TTCAGCAAGAACCACAGCAG<br>R: CCTGGGGTATCAGGTCATTG     | 181-197 | 1.5 | 56 | Tozaki et al.<br>2004                  | AB103921 |
| microsatellite | TKY724 | 7               | F: TGCATGGGAGAATTACTTCTTTT<br>R: TCTAGGATGGGAGCAGGAAA  | 288-300 | 2.0 | 54 | Tozaki et al.<br>2004                  | AB103942 |
| microsatellite | TKY757 | 7               | F: TGCAGCCTTTATATTGGAGGA<br>R: CCCCCAGTAGTTGGCTGTAT    | 113-135 | 1.5 | 50 | Tozaki et al.<br>2004                  | AB103975 |
| microsatellite | TKY822 | 7               | F: ATATATGCTGTGAGCCAACG<br>R: GCTTTCTCACAGTCCTCAAT     | 249     | 1.5 | 62 | Tozaki et al.<br>2004                  | AB104040 |
| microsatellite | TKY839 | <b>7q17-q18</b> | F: CCTTCCGTCCAAACCACCAG<br>R: TCTCTCCACACAGGAAATGA     | 144     | 1.5 | 58 |                                        | AB104057 |
| microsatellite | TKY858 | 7               | F: CCCCCAGCTTTACTGAGATA<br>R: CATCACTGCCAACTCTAGGT     | 206     | 2   | 58 |                                        | AB104076 |
| microsatellite | TKY884 | 7               | F: CATCAAGTTCAGGGCCAATC<br>R: CCTTGAACCTTCTGCCTTGC     | 92      | 2.0 | 58 |                                        | AB104102 |
| microsatellite | TKY927 | 7               | F: TTGGCCCAGTTTCCATTTC<br>R: CCATCGTGGGTAGATATCG       | 304     | 2.0 | 58 |                                        | AB104145 |
| microsatellite | TKY931 | 7               | F: ATAGCCATGCTATGTTTCACG<br>R: TAGAAATGAGGAGACGGAGG    | 253     | 1.5 | 58 |                                        | AB104149 |
| microsatellite | TKY946 | 7               | F: GATCCTAGGGCTTTGTGCG<br>R: CATACCATGGAACACTGCTC      | 110     | 2.0 | 58 | Brinkmeyer-<br>Langford et al.<br>2005 | AB104164 |

|                |         |            |                                                     |     |     |    |                                         |          |
|----------------|---------|------------|-----------------------------------------------------|-----|-----|----|-----------------------------------------|----------|
| microsatellite | TKY957  | 7p15-p14.3 | F: AGAAAGTCAGGGAGCAATC<br>R: CCTTTGAGACCACTCCAAAC   | 145 | 2.0 | 58 | Brinkmeyer-<br>Langford et al.<br>2005* | AB104175 |
| microsatellite | TKY986  | 7          | F: CTTTCCCTCACGAAGATGAC<br>R: TAGACTCCAGAATGGCATAAC | 118 | 2.0 | 58 | Tozaki et al.<br>2004                   | AB104204 |
| microsatellite | TKY1007 | 7          | F: GAGAGATTTGCTCTGCCTC<br>R: ATATCCTGCACCTACCTTTC   | 275 | 2.0 | 58 |                                         | AB104225 |
| microsatellite | TKY1029 | 7          | F: TAGCTTTGAGCCTGAAAGTC<br>R: TATCTCTAAGATGGCGAGTG  | 281 | 2.0 | 58 |                                         | AB104247 |
| microsatellite | TKY1058 | 7          | F: GATCCCCATTGACCATATGT<br>R: TTTAGAATGTTCCCAGGGAG  | 100 | 2.0 | 58 |                                         | AB104276 |
| microsatellite | TKY1062 | 7          | F: ATCAACCCCTCTTCATCTTC<br>R: AAAGTGGCTCCATTCTTTCG  | 140 | 2.0 | 58 |                                         | AB104280 |
| microsatellite | TKY1097 | 7          | F: TGATACAATCCACAGAGCTC<br>R: AATCTACCCACGTCCTAAAG  | 112 | 2.0 | 58 |                                         | AB104315 |
| microsatellite | TKY1107 | 7p15       | F: AGGGGGATGATTGAAAACAG<br>R: TCATGACACTACCTTTCCTG  | 197 | 2.0 | 58 | Brinkmeyer-<br>Langford et al.<br>2005* | AB104325 |
| microsatellite | TKY1112 | 7          | F: GATCACAGTGCGATGACTTG<br>R: AAAATTACCATGTGACCCATC | 149 | 2.0 | 58 | Brinkmeyer-<br>Langford et al.<br>2005  | AB104330 |
| microsatellite | TKY1147 | 7          | F: CTCTGGACTTTGGTTCACCTC<br>R: ATGTACGTCTGCATAGATGC | 176 | 2.0 | 58 |                                         | AB104365 |
| microsatellite | TKY1177 | 7          | F: GGGGAAACAGGAGACAAATT<br>R: AAACCACCCAATCTGTGGC   | 128 | 2.0 | 58 |                                         | AB104395 |
| microsatellite | TKY1294 | 7          | F: TCAACCATGTAATGCTGGAG<br>R: TAGGCCTAAGTGTTCACAAGA | 174 | 1.5 | 58 | Tozaki et al.<br>2007                   | AB215237 |
| microsatellite | TKY1518 | 7          | F: GAACATAATCCCCATCTCAC<br>R: CTCCTTCACTCTGCATCTTG  | 266 | 1.5 | 58 | Tozaki et al.<br>2007                   | AB215461 |
| microsatellite | TKY1929 | 7          | F: GAAGGTCTCTATAGTAACGG<br>R: GGTTTAGGAACAAGGGGCTG  | 132 | 1.5 | 58 | Tozaki et al.<br>2007                   | AB215872 |
| microsatellite | TKY2165 | 7          | F: CTATGGGAGCATTGAGGAG<br>R: GATTCCAGTGTGGAACAACCT  | 223 | 1.5 | 60 | Tozaki et al.<br>2007                   | AB216108 |
| microsatellite | TKY2366 | 7          | F: ACGGGCAATTTTCATCGTTTC<br>R: AAATTTTCAGCTTCTCCAGC | 228 | 1.5 | 58 | Tozaki et al.<br>2007                   | AB216309 |

|                                                                    |                              |                 |                                                       |         |      |    |                                        |          |
|--------------------------------------------------------------------|------------------------------|-----------------|-------------------------------------------------------|---------|------|----|----------------------------------------|----------|
| microsatellite                                                     | TKY2512                      | 7               | F: GCTGGAGCCTGTGATAAGAA<br>R: ATGACCTCTACCGCACACTC    | 215     | 1.5  | 58 | Tozaki et al.<br>2007                  | AB216455 |
| microsatellite                                                     | TKY3464                      | 7               | F: CTTCCCAGTTTCAGGCATTA<br>R: TCCACAGAGCATGAGTCAGA    | 233     | 1.5  | 58 | Tozaki et al.<br>2007                  | AB217407 |
| tripeptidyl<br>peptidase I                                         | TPP1                         | 7               | F: CTGGAAGATGGTTTAGGGAAG<br>R: CTATGTGTCATCCCAGACTCC  | 270     | 1.25 | 60 | Pascual et al.<br>2002                 | BI395244 |
| thyroid hormone<br>receptor interactor<br>10                       | TRIP10                       | 7               | F: TACCCATCATCGCCAAGTGT<br>R: TTCATGGGCTGGCTGAAGT     | 250     | 1.5  | 58 | Brinkmeyer-<br>Langford et al.<br>2005 | BP455004 |
| tubby homolog<br>(mouse)                                           | TUB                          | <b>7q16</b>     | F: GGGCTGGAATGTAACCAGAA<br>R: TCTGGTCCATGCACAATCAT    | 209     | 2.0  | 58 | Chowdhary et<br>al. 2003               | AF097580 |
| uncoupling protein<br>2                                            | UCP2                         | <b>7q14-q15</b> | F: GACCCCAAGCCTTCTACAAA<br>R: CCTCTTCAGCTGCTCGTAGG    | 464     | 1.5  | 52 |                                        |          |
| uncoupling protein<br>3                                            | UCP3                         | <b>7q14</b>     | F: GATGAGCTTCGCCTCCATC<br>R: GCCAAAATCCGGGTAATGAT     | 337     | 1.5  | 60 |                                        |          |
| UEV and<br>lactate/malate<br>dehydrogenase<br>domains              | UEVLD<br>( <i>FLJ11068</i> ) | 7q18            | F: CAATTCGTTTGTGGATTTTGG<br>R: TATTCTGCCTTGAGCATCCAC  | 116     | 1.5  | 55 | Perrocheau et<br>al. 2006*             | DX010480 |
| ubiquitin-like,<br>containing PHD<br>and RING finger<br>domains, 1 | UHRF1                        | 7               | F: GGGAACCTCGTTCACGTACAC<br>R: TGTTGGTGTGTTGGTGAGTTTC | 100     | 2    | 60 | Brinkmeyer-<br>Langford et al.<br>2005 | BP169308 |
| microsatellite                                                     | UMNe074                      | 7               | F: CGATGGATGTGCTGTAAACG<br>R: TGCTGCCTTCTCCCTCAC      | 139-143 | 1.5  | 58 | Roberts et al.<br>2000                 | AF191705 |
| microsatellite                                                     | UMNe093                      | 7               | F: CGCAGAGTTGGAGACACCTG<br>R: GGTGCCATCCACTGAAACAC    | 167     | 1.5  | 58 | Wagner et al.<br>2004a                 | AY391287 |
| microsatellite                                                     | UMNe100                      | 7               | F: CTGATGCAGAGGCATTTCTG<br>R: CGTCAGCTGAGGCAACTATG    | 183     | 1.5  | 58 | Wagner et al.<br>2004a                 | AY391289 |
| microsatellite                                                     | UMNe333                      | 7               | F: GGCTTCTGCCTTGTTGTCTC<br>R: CGGCACAGATGTTAGCTCAG    | 144     | 1.5  | 62 |                                        |          |
| microsatellite                                                     | UMNe356                      | 7               | F: GATCTCCCAGTCCCCCAC<br>R: TGACGGCTGAGTCAGAACC       | 177     | 2.0  | 58 |                                        |          |

|                                              |                            |             |                                                        |      |     |             |                                                                    |          |
|----------------------------------------------|----------------------------|-------------|--------------------------------------------------------|------|-----|-------------|--------------------------------------------------------------------|----------|
| microsatellite                               | UMNe359                    | 7           | F: GTGTGACGGAGGACGAGG<br>R: TGGTGCCATCCACTGAAAC        | 140  | 2.0 | 62          | Wagner et al.<br>2004a                                             | AY391348 |
| microsatellite                               | UMNe425                    | 7p12-p11    | F: GAAAGAGCAAGGAGCCAAAG<br>R: GCTTGCAAATGTTTGGGG       | 213  | 1.5 | 58          | Brinkmeyer-<br>Langford et al.<br>2005*                            |          |
| microsatellite                               | UMNe459                    | <b>7q14</b> | F: CTTTTTGGAAGACATCACTCC<br>R: TTAGTCCAAAATACAAGCAGGC  | 142  | 1.5 | 60          |                                                                    |          |
| microsatellite                               | UMNe565                    | 7q12-q13    | F: GAGAGCTAACCAGAATTGCCC<br>R: CTATACCGTCAACTCTCCTGGG  | ~300 | 1.5 | 62          | Wagner et al.<br>2004c;<br>Brinkmeyer-<br>Langford et al.<br>2005* | AY735270 |
| microsatellite                               | UMNe574                    | 7           | F: AAAGTGGTTTCTGCCACCAC<br>R: ATTGGATATTGGTCAGAGTGGG   | ~150 | 1.5 | 58          | Wagner et al.<br>2004c                                             |          |
| microsatellite                               | UMNe606                    | 7           | F: TGCCTTTACCTTACAAACAC<br>R: ATCCAAGAATATCATATTGGC    | 150  | 1.5 | 58          | Brinkmeyer-<br>Langford et al.<br>2005                             |          |
| microsatellite                               | VHL108                     | 7           | F: TTTCTTTCCCTCAGGCTGGA<br>R: GACCTAAGAGAACCCCTTAAGT   | 191  | 1.5 | 58          | van Haeringen<br>et al. 1998                                       | Y08445   |
| extracellular link<br>domain containing<br>1 | XLKD1<br>( <i>LYVE-1</i> ) | 7q16-q18    | F: TCTCCAGCTTATCCACTTTCAA<br>R: TCTCAGGCTCTTCTTGATGGA  | 211  | 3.0 | 58          | Chowdhary et<br>al. 2003*                                          |          |
| microsatellite                               | ZuBeEq11                   | 7           | F: CCAAAGACTAATTACCATCTGCAC<br>R: TGGATGAACATCAAGGGAGA | 208  | 1.5 | TD<br>63-55 | Klukowska-<br>Rotzler et al.<br>2006                               | CR957095 |

| Name                                                                       | Symbol           | Horse chr.           | Primers                                                 | Product size (bp) | MgCl <sub>2</sub> (mM) | T <sub>a</sub> | Reference                 | Accession No |
|----------------------------------------------------------------------------|------------------|----------------------|---------------------------------------------------------|-------------------|------------------------|----------------|---------------------------|--------------|
| microsatellite                                                             | 8CA001           | 8                    | F: AATACCCGTGCTTTCAAGGT<br>R: CCGGGATGTGGAGCTACG        | 134-150           | 1.5                    | 58             |                           | AY820145     |
| sequence tagged site                                                       | 8STS01<br>(PAI2) | 8q23                 | F: GAGGACGCCTTCAACAAGGG<br>R: TCTGCCACAACTGTGGGCC       | 200               | 1.5                    | TD<br>65       | Mariat et al.<br>2001     |              |
| acetyl-Coenzyme A<br>acyltransferase 2                                     | ACAA2            | 8                    | F: CGTCGAGGTGGAAAATATGC<br>R: TGCTCTGAAGGTCACCTGTTT     | 161               | 1.5                    | 58             |                           | CX597606     |
| adenosine A2a<br>receptor                                                  | ADORA2A          | 8                    | F: CCACCCTCCCCAGACTTTCC<br>R: GCACCGCTCCATTACAACCTCC    | 303               | 1.5                    | 60             |                           | AY394857     |
| microsatellite                                                             | AHT003           | 8                    | F: CAAACATCAGTTAAGAGTGA<br>R: CTCTAATCCAGCAGTGTTCA      | 123-137           | 1.5                    | 50             | Binns et al.<br>1995      |              |
| microsatellite                                                             | AHT005           | 8                    | F: ACGGACACATCCCTGCCTGC<br>R: GCAGGCTAAGGGGGCTCAGC      | 150               | 1.5                    | 58             | Binns et al.<br>1995      |              |
| microsatellite                                                             | AHT025           | 8p17-<br>p16         | F: TCCCACATGCCACAACATAGA<br>R: TTCCCCCTTGCTTTTAAAAC     | 172-176           | 2.0                    | 58             | Swinburne et<br>al. 2000* | AJ272107     |
| microsatellite                                                             | AHT130           | 8                    | F: TGCAAGAGCCATTTGATGTC<br>R: CCTGTGCTAGAAAGGGAGAA      | 244-248           | 1.5                    | 58             | Swinburne et<br>al. 2005  |              |
| microsatellite                                                             | AHT131           | 8                    | F: GAGGGGTTGGCTACAGAATG<br>R: AGATTGCCCAACAATTCAGG      | 183-188           | 1.5                    | 58             | Swinburne et<br>al. 2005  |              |
| alpha-kinase 2                                                             | ALPK2            | 8                    | F: AGCCGCTTCTAAACCAGTCA<br>R: AAGTCCTTGGAACACAACC       | 197               | 1.5                    | 60             |                           |              |
| microsatellite                                                             | ASB14            | 8                    | F: CTCCATGAATTCTCGCAGGTTGG<br>R: CCATGGGCCATATGCACACTGC | 120               | 2.0                    | 58             | Breen et al.<br>1997      | X95329       |
| activating signal<br>cointegrator 1<br>complex subunit 2                   | ASCC2            | 8                    | F: CGTGAGACAACCCAGGAAC<br>R: GCTGTGGGATAAGGCACTG        | 333               | 1.5                    | 58             |                           | CX603744     |
| ATPase, Ca <sup>++</sup><br>transporting, cardiac<br>muscle, slow twitch 2 | ATP2A2           | 8p14-<br>p12         | F: TGGCAACAATTTGTGCTCTT<br>R: GCAGGCATTTGCTCGTTCTA      | 916               | 1.5                    | 58             | Muller et al.<br>2006*    |              |
| ATPase, Class II, type<br>9B                                               | ATP9B            | 8                    | F: GCCAATTCGTCATGCACA<br>R: TGAGGAAGCCCTGGTACAGA        | 308               | 1.5                    | 58             |                           | DN505743     |
| ataxin 2                                                                   | ATXN2            | <b>8p14-<br/>p13</b> | F: TGAGAAATGTTGGAGGCTAGG<br>R: TGTTGTCGAGACTGGAATGG     | 394               | 1                      | 55             |                           | AY788863     |

|                                                                                     |                              |          |                                                           |         |     |    |                         |          |
|-------------------------------------------------------------------------------------|------------------------------|----------|-----------------------------------------------------------|---------|-----|----|-------------------------|----------|
| breakpoint cluster region                                                           | BCR                          | 8p17     | F: AGAACCTCACCTCCAGCGAG<br>R: TCCCGGAACATGCGGTAG          | 105     | 1.5 | 62 | Mariat et al. 2001*     |          |
| coiled-coil domain containing 5                                                     | CCDC5                        | 8        | F: GTTGCTGCGTGGTTGAAAA<br>R: ATTCGCTTGCCTTCTGTTTC         | 163     | 1.5 | 60 |                         | DN504612 |
| cadherin 2, type 1, N-cadherin (neuronal)                                           | CDH2                         | 8q14-q15 | F: TCAGTCCACTGCCACTGTGT<br>R: TTTGCTGCATATATCGATCTGG      | 199     | 2.0 | 58 | Chowdhary et al. 2003*  | AY008774 |
| CNDP dipeptidase 2                                                                  | CNDP2<br>( <i>FLJ10830</i> ) | 8q21.3   | F: CCTGGACGAGCTGATTTTTG<br>R: CGTAAGTGATGCAGGGCTTC        | 110     | 1.5 | 55 | Perrocheau et al. 2005* | AY817467 |
| catechol-O-methyltransferase                                                        | COMT                         | 8        | F: CTTGCTGAGACCTTGACACC<br>R: TCAAGGAGCTCTGCATACCC        | 251     | 1.5 | 62 | Momozawa et al. 2005    | AB178284 |
| microsatellite                                                                      | COR003                       | 8        | F: TAGGGAAACTCCTCAAAGCC<br>R: GAAACCAAAACCTTCATCCA        | 186-206 | 3.0 | 58 | Hopman et al. 1999      | AF083446 |
| microsatellite                                                                      | COR012                       | 8        | F: TCTAGGAAAGACCCATCACG<br>R: AGTAAGTGAGGCCAAGGAT         | 162-176 | 2.0 | 58 | Hopman et al. 1999      | AF083455 |
| microsatellite                                                                      | COR056                       | 8        | F: AGATTCCAGGCATTAGGACC<br>R: TCAGGGACAATCTTCCTCAAG       | 184-210 | 3.0 | 58 | Ruth et al. 1999        | AF108373 |
| microsatellite                                                                      | COR097                       | 8        | F: GGGATTTCTGAGATGCTGAA<br>R: ATGGCTGGCTAGAGTTTGTG        | 236-242 | 1.5 | 58 | Tallmadge et al. 1999b  | AF154950 |
| cytochrome b5 type A                                                                | CYB5A                        | 8        | F: CGGACAAGGCGGTGAAGTA<br>R: TTGGTCAAATCGTACACCTTGT       | 103     | 1.5 | 60 |                         | CX594805 |
| DiGeorge syndrome critical region gene 14                                           | DGCR14                       | 8        | F: CTACAGGCGGTCATCCAGA<br>R: GGCTCTCGGGACATCTTG           | 155     | 1.5 | 58 |                         |          |
| desmocollin 2                                                                       | DSC2                         | 8        | F: GTCTTTGTGGCCTAGCTGGA<br>R: GTTGCTTGTTGCCCTAGAA         | 205     | 2.0 | 58 | Chowdhary et al. 2003   | AY008781 |
| erythrocyte membrane protein band 4.1-like 3                                        | EPB41L3                      | 8        | F: TCAGAGCCAAGCCTTAAACTG<br>R: TTCGCTATGCAGAAACGTACA      | 150     | 1.5 | 60 |                         |          |
| family with sequence similarity 38, member B                                        | FAM38B                       | 8        | F: TGGAAGGACAAGCCTCATTC<br>R: CCTGAGACGTCAGTGGTGTTC       | 115     | 1.5 | 60 |                         | CX600321 |
| UDP-N-acetyl-alpha-D-galactosamine:polypeptide N-acetyl-galactosaminyltransferase 1 | GALNT1                       | 8q16     | F: CGAAATGTGGAAACAAATCAG<br>R: TCTAATTTCTTTGTTGGCAGTATAAG | 642     | 1.5 | 58 | Perrocheau et al. 2006  | CX598432 |



|                                                       |                      |                             |                                                         |         |     |    |                                              |          |
|-------------------------------------------------------|----------------------|-----------------------------|---------------------------------------------------------|---------|-----|----|----------------------------------------------|----------|
| galanin receptor 1                                    | GALR1                | 8                           | F: CTTCTTCACCGTCTCCATGC<br>R: GAAGAGGCGCTGGTGGTAT       | 193     | 2.0 | 58 | Chowdhary et al. 2003                        | AY008783 |
| GCN1 general control of amino-acid synthesis 1-like 1 | GCN1L1               | 8p15                        | F: TGGAGAAGTTGGAGAAGCTGA<br>R: TTGAGGATACAGGGGATGATG    | 166     | 1.5 | 55 | Perrocheau et al. 2006*                      | DX010493 |
| G protein-coupled receptor kinase interactor 2        | GIT2                 | 8p15                        | F: TGAAAATTCTGAACCTCAGGAA<br>R: GGATGGTTCACCTCTCCCATT   | 192     | 1.5 | 55 | Perrocheau et al. 2006*                      | DX010494 |
| immediate early response 3 interacting protein 1      | IER3IP1<br>(HSPC039) | 8                           | F: GAATTCTCCCTGAGATCAGAG<br>R: AAAAGTGTACCGGACTGTCAC    | 310     | 3.0 | 58 | Chowdhary et al. 2003                        |          |
| laminin, alpha 1                                      | LAMA1<br>(LAMA3)     | <b>8q12-q13</b>             | F: CAACATCTTCCAGAGGGCTCAT<br>R: CCATTTCCCGTCATTGAACTTC  | 152     | 3.0 | 58 | Chowdhary et al. 2003                        |          |
| microsatellite                                        | LEX023               | 8p13-p12                    | F: GGATGAAACAGGGAAGGAAA<br>R: CCAACGGATTCATGAAAGCTA     | 246-268 | 2.0 | 58 | Coogle et al. 1996;<br>Lindgren et al. 2000* | AF075625 |
| microsatellite                                        | LEX029               | 8                           | F: TGGGGTGTCACTGCTTCTC<br>R: ACTGAGGGCCAGGTTTCTAA       | 260-268 | 2.0 | 58 | Coogle et al. 1996                           | AF075631 |
| lipin 2                                               | LPIN2                | <b>8q13-q14<sup>a</sup></b> | F: AAAGCTTCCTGCTTACCTTGC<br>R: GAGCAAAAACCTCTCTCCGTGTC  | 155     | 1.5 | 55 | Perrocheau et al. 2006                       | DX010521 |
| methyl-CpG binding domain protein 2                   | MBD2                 | 8                           | F: TTGGTCCAGGTAGTAACGATGA<br>R: GACAATGAAAGCCTTGCAGA    | 158     | 1.5 | 60 |                                              | CX605069 |
| malic enzyme 2, NAD(+)-dependent, mitochondrial       | ME2                  | 8                           | F: TGGACAGAACACACTTATTCAGTT<br>R: CCCAGTAACCTTTTGTGC    | 235     | 1.5 | 58 |                                              |          |
| molybdenum cofactor sulfurase                         | MOCOS                | 8                           | F: TAACCCTCACAGCCAGAACG<br>R: GCCTCTGCCACCAGTTTAAAG     | 1082    | 1.5 | 55 |                                              |          |
| metallophosphoesterase 1                              | MPPE1                | 8                           | F: CAACAGTGTGCACTGGAAG<br>R: CACAAGGACTGGGGCTGAC        | 298     | 1.5 | 60 |                                              | CX601769 |
| asparaginyl-tRNA synthetase                           | NARS                 | 8                           | F: GCTGGACAAACCGAGGGTAT<br>R: TGCCTATTTGGGATAGTGAGG     | 776     | 3.0 | 50 | Chowdhary et al. 2003                        |          |
| NADH dehydrogenase flavoprotein 2, 24kDa              | NDUFV2               | 8                           | F: CTCCTGAGAATAACCCAGATACTCC<br>R: GCAGCCATCCATTCTGTCTT | 235     | 1.5 | 60 |                                              | CX594923 |
| pescadillo homolog 1                                  | PES1                 | <b>8p17-p16</b>             | F: GGGTGTTTGACTATGTGAACG<br>R: ATCTCCTTCCTTCTCCGACAC    | 110     | 1.5 | 60 |                                              | CX602171 |

|                                                                     |                              |                      |                                                              |      |     |    |                                                   |
|---------------------------------------------------------------------|------------------------------|----------------------|--------------------------------------------------------------|------|-----|----|---------------------------------------------------|
| piwi-like 1<br>(Drosophila)                                         | PIWIL1                       | 8                    | F: TACTCTGGCCAACAAGG<br>R: AGGCTGTGAGAAAGTGGTAG              | 351  | 2.0 | 58 |                                                   |
| protein kinase, AMP-<br>activated, beta 1 non-<br>catalytic subunit | PRKAB1                       | <b>8p15</b>          | F: GTCTTCTGAAAACCTCACTCTG<br>R: GTATCTGGTGTGCTGTCTC          | 146  | 1.5 | 60 |                                                   |
| proteasome 26S<br>subunit, non-ATPase,<br>9                         | PSMD9                        | 8                    | F: ATCTTCTCTTGCCCTGGACT<br>R: CAGTGTTTCCACCACCTAGAA          | 112  | 1.5 | 58 | CX599547                                          |
| protein tyrosine<br>phosphatase, receptor<br>type, M                | PTPRM                        | <b>8q12-<br/>q13</b> | F: CATCCCTGCTCCCAAGTTAG<br>R: CACCGGTTTTTCTCATGGTT           | 925  | 1.5 | 60 | CX596065                                          |
| retinoblastoma<br>binding protein 8                                 | RBBP8                        | 8                    | F: TCAACTGTCCAAAGACAACCTCA<br>R: TCCTTTAATTTTGTCCAAAGATCC    | 179  | 1.5 | 58 |                                                   |
| ring finger protein 10                                              | RNF10                        | 8                    | F: CTGAGGGTCGGAAGCAAAAG<br>R: GAATTCTGGAAGCTGGGCACAG         | 250  | 2.0 | 58 | BI961511                                          |
| Rho-associated,<br>coiled-coil containing<br>protein kinase 1       | ROCK1                        | 8                    | F: GCATGCTAACCAAGATATTGAA<br>R: TGTGTTTTAAGGGTTCGTTCTG       | 420  | 1.5 | 58 | CX604958                                          |
| arginine/serine-rich<br>coiled-coil 2                               | RSRC2<br>( <i>FLJ11021</i> ) | 8                    | F: CCTTGCCAAAGCATCTTTC<br>R: GGAACGCAAGTAACTCCTCA            | 167  | 3.0 | 58 | Chowdhary et<br>al. 2003                          |
| squamous cell<br>carcinoma antigen<br>recognized by T cells<br>3    | SART3<br>( <i>SCCA3</i> )    | 8p16-<br>p15         | F: GTGACACTTGTTTTATAGCAATTCTG<br>R: CAAAATACATCCATATTTGAATGC | 241  | 2.0 | 58 | Lear et al.<br>2001*;<br>Chowdhary et<br>al. 2003 |
| strawberry notch<br>homolog 1<br>(Drosophila)                       | SBNO1                        | 8                    | F: CACCAGTTATTTACCTGCTC<br>R: TCATCCAGGGTATTAGGAGGA          | ~263 | 1.5 | 58 | DN507503                                          |
| scavenger receptor<br>class B, member 1                             | SCARB1                       | 8                    | F: GGTAAGACCTCCAGTCCTTC<br>R: CGGATTTGGTAGACGATGG            | 125  | 1.5 | 54 | CX595686                                          |
| scavenger receptor<br>class F, member 2                             | SCARF2                       | 8                    | F: CCTGGATAACACACTCAACTGC<br>R: GTGGTGTGCAAGGAGGAGA          | 105  | 1.5 | 60 |                                                   |
| serpin peptidase<br>inhibitor, clade B,<br>member 2                 | SERPINB2<br>( <i>PAI2</i> )  | 8q23                 | F: CCGGAATTTGGCAGACTT<br>R: CCATTCATCCTTCCGTTCTC             | 106  | 1.5 | 58 | Mariat et al.<br>2001*                            |
| splicing factor,<br>arginine/serine-rich 8                          | SFRS8                        | <b>8p13</b>          | F: GTGGCTGCGGTTACAGAA<br>R: CAGGTAAGAGACTGCTGGTCA            | 174  | 1.5 | 58 | CX599637                                          |

|                                                      |                        |             |                                                           |         |     |    |                         |          |
|------------------------------------------------------|------------------------|-------------|-----------------------------------------------------------|---------|-----|----|-------------------------|----------|
| microsatellite                                       | SGCV32                 | 8q14-q16    | F: TGTTCCAAAATGGAGGGTGAGCC<br>R: CCACAGGCTCTTAAAACCAGAAGC | 139     | 3.0 | 58 | Godard et al. 1997*     | U90607   |
| solute carrier family 15, member 4                   | SLC15A4                | 8           | F: CATTCTGTGAGGTACGACCA<br>R: GCCCGACATTTATGGCTAC         | 170     | 1.5 | 58 |                         |          |
| SMAD family member 2                                 | SMAD2 ( <i>MADH2</i> ) | 8q21.1      | F: CTCTCCCGTAAAGGAGGAAGA<br>R: GAAGCAGCACACACACACCTA      | 196     | 1.5 | 55 | Perrocheau et al. 2006* | DX010522 |
| small nuclear ribonucleoprotein D3 polypeptide 18kDa | SNRPD3                 | 8           | F: TGGGACGTGGAAACATCTTC<br>R: ACCCCCGAACTGAGATAACC        | 100     | 1.5 | 54 |                         | DN508752 |
| T-box 5                                              | TBX5                   | 8           | F: CTACCGCTCCAGCTACCC<br>R: GCTATTGTCACTCCACTCTGG         | 496     | 1.5 | 64 |                         | CX593794 |
| thyroid hormone receptor associated protein 2        | THRAP2                 | <b>8p14</b> | F: CAGAAGGCAGTCAAGCTCAACC<br>R: CTCAGACAGACACGCACAGCAAC   | 416     | 2.0 | 58 |                         | BI961576 |
| microsatellite                                       | TKY359                 | 8           | F: ATAATCAGCATGCCTCTCAG<br>R: AGGAACATTTCTTACCTTAC        | 191-203 | 1.5 | 54 | Tozaki et al. 2001      | AB044859 |
| microsatellite                                       | TKY362                 | 8           | F: GACCTCTCAGCGTAGATTAC<br>R: GCTGTTTCAGGTCCAACAG         | 186-190 | 1.5 | 50 |                         | AB044862 |
| microsatellite                                       | TKY391                 | 8           | F: GCCGAAAACAACCTGCATACTG<br>R: CTTTAGGGCCAATTATCTCC      | 182-188 | 1.5 | 54 | Tozaki et al. 2001      | AB048297 |
| microsatellite                                       | TKY409                 | 8           | F: TCCTCAGAGCCCCGAAAATTA<br>R: ACTGTTGACGGCCACTGATT       | 326-340 | 1.5 | 58 |                         | AB103627 |
| microsatellite                                       | TKY436                 | 8           | F: CCAGAAATCCCGAGTAGCTG<br>R: GGTCTTTCCAACCACATACACA      | 144-154 | 1.5 | 58 | Tozaki et al. 2004      | AB103654 |
| microsatellite                                       | TKY458                 | 8           | F: CACACACTCTTGGGGAAATG<br>R: AAGCCACCCAGAGCCAGGTG        | 133     | 2.0 | 58 |                         | AB103676 |
| microsatellite                                       | TKY468                 | 8           | F: TTCCCTAAAGGCAACCACAG<br>R: TGTGGAATCAATGTTCTGCAA       | 284-296 | 1.5 | 55 | Tozaki et al. 2004      | AB103686 |
| microsatellite                                       | TKY470                 | 8           | F: CCGAGATCACTCAAACCTGAT<br>R: AGAGACCAAAGGATAGGTAG       | 197     | 2.0 | 58 |                         | AB103688 |
| microsatellite                                       | TKY509                 | 8           | F: CCTGATTGATGTATCTCCAC<br>R: TTGATGAGGACGTTATGCTC        | 237     | 2.0 | 58 |                         | AB103727 |
| microsatellite                                       | TKY513                 | 8           | F: CCCGCTTCAGTGAAATGTCT<br>R: CCAAGTCAAAACACCGTAACAA      | 232-246 | 1.5 | 50 | Tozaki et al. 2004      | AB103731 |
| microsatellite                                       | TKY573                 | 8           | F: CAGAATGAGGCGTTGAATCC                                   | 252-260 | 1.5 | 58 |                         | AB103791 |

|                |         |   |                                                                                  |         |     |    |                       |          |
|----------------|---------|---|----------------------------------------------------------------------------------|---------|-----|----|-----------------------|----------|
| microsatellite | TKY620  | 8 | R: AGAGGCTTTAGGCTGGGAGT<br>F: GGACTTGGTCTGGTGA CTCC<br>R: CCATTGTGATTCTCCGTC ACT | 155-169 | 1.5 | 58 | 2004<br>Tozaki et al. | AB103838 |
| microsatellite | TKY653  | 8 | F: ACTGGCTCCAAAGACCATG<br>R: CGTTGAGGACATTCTCTCAC                                | 225     | 2.0 | 58 | 2004                  | AB103871 |
| microsatellite | TKY669  | 8 | F: CCCAGTTTTCCATCGTGAGT<br>R: TGA CTGCTGGCATT TGTTC                              | 186-200 | 1.5 | 58 | Tozaki et al.         | AB103887 |
| microsatellite | TKY813  | 8 | F: CCACCAATCTGTGGTTCTAT<br>R: TGATGTTCTCCTTGCCGAAA                               | 197     | 1.5 | 62 | 2004<br>Tozaki et al. | AB104031 |
| microsatellite | TKY894  | 8 | F: TCCCATTTACCATAGCATCA<br>R: AGCAA ACTA ACCAGTCCTC                              | 232     | 2.0 | 58 |                       | AB104112 |
| microsatellite | TKY901  | 8 | F: TGCCCAAGACACTGGTTTG<br>R: TACCACAAAGTCAAGGTCTG                                | 264     | 2.0 | 58 | Tozaki et al.         | AB104119 |
| microsatellite | TKY904  | 8 | F: AAGATTGGCATGGGTGTTAG<br>R: GGCTGCACCATTTTACATTC                               | 159     | 2.0 | 58 | 2004                  | AB104122 |
| microsatellite | TKY923  | 8 | F: ATTCAGCATGGTGATTGTAGT<br>R: TGTTGGTATGAACATTTCGTGC                            | 298     | 2.0 | 58 |                       | AB104141 |
| microsatellite | TKY932  | 8 | F: ACTTAGAAGAGGAGAAGACTC<br>R: GATATTGTTGCAAAGGGCAG                              | 205     | 2.0 | 58 | Tozaki et al.         | AB104150 |
| microsatellite | TKY955  | 8 | F: GCAGAATCATGGAGATGGAG<br>R: ACCACATGGATAGCTTTACC                               | 205     | 2.0 | 58 | 2004<br>Tozaki et al. | AB104173 |
| microsatellite | TKY961  | 8 | F: TCAGTCCAGAGGTTTCAGTG<br>R: CAAGGGAGAATCGAAGCATC                               | 164     | 2.0 | 58 |                       | AB104179 |
| microsatellite | TKY985  | 8 | F: ATTGGCATGGATGTTAGCTC<br>R: AAAGTGCATGGTCTGAATCC                               | 101     | 2.0 | 58 |                       | AB104203 |
| microsatellite | TKY994  | 8 | F: AGTTGCTACTAGAGATGCTG<br>R: CTGCAATGGTCCAGAAGAC                                | 118-124 | 2.0 | 58 | Tozaki et al.         | AB104212 |
| microsatellite | TKY1045 | 8 | F: CACTCCAGTCTTCCTGAAAC<br>R: GAATTCTAGTTCGGTCCCTC                               | 120     | 2.0 | 58 | 2004                  | AB104263 |
| microsatellite | TKY1051 | 8 | F: GTTGGCCTTAATACTCATGC<br>R: AATAGACATAGAGTGCCCTG                               | 96      | 2.0 | 58 |                       | AB104269 |
| microsatellite | TKY1056 | 8 | F: CATGCTCTTAGCTACTATGC<br>R: TCATGCTGTTAGCATTGTGG                               | 123     | 2.0 | 58 |                       | AB104274 |

|                                       |          |              |                                                            |         |     |    |                                                    |          |
|---------------------------------------|----------|--------------|------------------------------------------------------------|---------|-----|----|----------------------------------------------------|----------|
| microsatellite                        | TKY1157  | 8            | F: AAAGGTGCCATTTTCGGGTC<br>R: CAAGCCTTATTTGTTGAGTGC        | 181     | 2.0 | 58 | Tozaki et al.<br>2004                              | AB104375 |
| microsatellite                        | TKY1161  | 8            | F: AGATGGGACACGGATGTTAG<br>R: TGTAATAATCATGTGGGCCTG        | 284     | 2.0 | 58 |                                                    | AB104379 |
| microsatellite                        | TKY2159  | 8            | F: GCTAGTCATGGAGAAATCTA<br>R: ATATTGGACAGAGCAGGTC          | 147     | 1.5 | 58 | Tozaki et al.<br>2007                              | AB216102 |
| microsatellite                        | TKY3255  | 8            | F: TTTTATACCTGCCAATGGTG<br>R: TGAAACAGAGCTGTGAACAG         | 110     | 1.5 | 58 | Tozaki et al.<br>2007                              | AB217198 |
| microsatellite                        | TKY3280  | 8            | F: CCCTGTGAATGAGAATTCAC<br>R: ACCACCTGTCCATGTGACA          | 123     | 1.5 | 58 | Tozaki et al.<br>2007                              | AB217223 |
| two pore segment<br>channel 1         | TPCN1    | <b>8p14</b>  | F: ACTTCAGCACCTGGAGAAC<br>R: ATGAAGAAGACGCAGGACCA          | 375     | 2.0 | 61 |                                                    | AY847946 |
| thymidylate<br>synthetase             | TYMS     | 8q12-<br>q14 | F: GCCCTGCTCACCTACATGAT<br>R: TCCATGGAAGGTTACAAAGTGA       | 194     | 2.0 | 58 | Lear et al.<br>2000* ;<br>Chowdhary et<br>al. 2003 | AF130786 |
| ubiquitin-conjugating<br>enzyme E2L 3 | UBE2L3   | 8            | F: AGCCTGGAAACTCCCACCTTT<br>R: TTAGAACCAACCCCCACACT        | 160     | 2.0 | 55 |                                                    |          |
| ubiquitin protein<br>ligase E3B       | UBE3B    | 8            | F: CCTGGACTTCTGGAGAACAGTGTC<br>R: CCAGAGGAACTGAGCATTTAAGGG | 151     | 2.0 | 58 |                                                    | BI961658 |
| microsatellite                        | UCDEQ046 | 8            | F: GCCAAACGCTGGAGGGTT<br>R: CCACATTCACACACATGCACAC         | 230-238 | 2.0 | 58 | Eggleston-<br>Stott et al.<br>1996                 | U25171   |
| microsatellite                        | UM033    | 8            | F: CATTGTCCTGAGCAAGTC<br>R: CTATCCGTCAAGTGTTTC             | 126-140 | 2.0 | 58 | George et. al<br>1998                              | AF195579 |
| microsatellite                        | UM034    | 8            | F: TTGAAACCCTTCAGACCC<br>R: CAGAGAGCAAGTGTGAG              | 102-117 | 2.0 | 58 | George et. al<br>1998                              | AF195580 |
| microsatellite                        | UMNe070  | 8            | F: TGGGCATTATTTACAGTATGC<br>R: TACATTAGGCCTGGAATGGG        | 150-152 | 1.5 | 58 | Roberts et al.<br>2000                             | AF191703 |
| microsatellite                        | UMNe164  | 8            | F: AAAGAGGAGGATTGGCAATG<br>R: ATCTCCAGTGTGACAATCTCTACC     | 105     | 2.0 | 58 | Wagner et al.<br>2004a                             | AY391307 |
| microsatellite                        | UMNe211  | 8            | F: ATCCATGTTCTTGTGAATGGG<br>R: CAATCTAGGTGCCAAACAACCTG     | 149     | 2.0 | 62 | Mickelson et<br>al. 2003                           | AF536293 |
| microsatellite                        | UMNe238  | 8            | F: CCAGCACCCTGTTCAAGAC<br>R: TCTAGCCATATGTTACCCTGCC        | 198     | 2.0 | 58 | Wagner et al.<br>2004a                             | AY391326 |

|                                                       |         |                 |                                                            |      |     |       |                           |          |
|-------------------------------------------------------|---------|-----------------|------------------------------------------------------------|------|-----|-------|---------------------------|----------|
| microsatellite                                        | UMNe385 | 8               | F: GGATGCCAATCTCCTTTTCAC<br>R: CTATGTCTTTATAAGCGCGCG       | 156  | 2.0 | 58    | Wagner et al. 2004c       | AY735244 |
| microsatellite                                        | UMNe479 | 8               | F: TACGGTAGGACCAATGCCTC<br>R: GCCGTCAGAGAAAAGACAGG         | ~200 | 1.5 | 58    | Mickelson et al. 2004     | AY731401 |
| microsatellite                                        | UMNe526 | 8               | F: GGCTGTCAGGGGTCACAC<br>R: ACATTGATACAATCCATCCACC         | 147  | 1.5 | 60    | Wagner et al. 2004c       | AY735260 |
| microsatellite                                        | UMNe532 | 8               | F: TAACATCAATTGGGCAAAACG<br>R: GTAGCAAAAGGGGTGTGTGC        | 233  | 1.5 | 58    | Mickelson et al. 2004     | AY731408 |
| microsatellite                                        | UMNe545 | 8               | F: TCGCTCTCCTCTCTGTCTC<br>R: TATGGCTGCAGATTCCACTG          | 197  | 1.5 | 62    | Wagner et al. 2004c       | AY735265 |
| microsatellite                                        | UMNe578 | 8               | F: TTCACACGCTCGTTCTCATC<br>R: TTGTGCAAAAAGAGCCTACTTG       | ~125 | 1.5 | 58    | Wagner et al. 2004c       | AY735279 |
| microsatellite                                        | UMNe579 | 8               | F: ACAAGGTCACGCCTGAGC<br>R: TGTGGAAACTCTGACTTGGG           | ~225 | 1.5 | 58    |                           |          |
| VAMP-associated protein A, 33kDa                      | VAPA    | 8               | F: TAGCAGATGTCAGTTGCACATTC<br>R: AAGGAGAAAATTTACACTGTAAGGC | 254  | 3.0 | TD 60 |                           | G62203   |
| microsatellite                                        | VHL073  | 8               | F: GGTCATTCTCCCAAAGCAAAAC<br>R: AAGAGAAGGTGGATTTCAGAGG     |      |     |       | van Haeringen et al. 1998 |          |
| vacuolar protein sorting 33 homolog A (S. cerevisiae) | VPS33A  | <b>8p14-p13</b> | F: CAAGTGGCCAATATGATGATCAGGATG<br>R: ACAATGAAGGGAACCAGCAC  | 800  | 1.5 | 58    |                           |          |
| WD repeat and SOCS box-containing 2                   | WSB2    | 8p14            | F: CGCTGCTCTCCTTCAGTG<br>R: GCACCTATTAAGAAAGCCAAAG         | 122  | 1.5 | 54    |                           | CX602847 |
| X-box binding protein 1                               | XPB1    | 8               | F: TCCAAGCAGAGAACACCTACC<br>R: ATGGAGAAAGCACCTTCCAA        | 157  | 1.5 | 58    |                           |          |

| Name                                                                | Symbol   | Horse chr.     | Primers                                                  | Product size (bp) | MgCl <sub>2</sub> (mM) | T <sub>a</sub> | Reference                           | Accession No |
|---------------------------------------------------------------------|----------|----------------|----------------------------------------------------------|-------------------|------------------------|----------------|-------------------------------------|--------------|
| sequence tagged site                                                | 9STS01   | 9              | F: CATGACACCTTTTGA CTCTTC<br>R: TGAAGCCCAAAAGGGAAC       | 130               | 1.5                    | 58             |                                     |              |
| actin-binding Rho activating protein                                | ABRA     | 9              | F: AACCAAAACCGCTGAAAGG<br>R: AGTCCACCAGTCCGTGTTTC        | 209               | 1.5                    | 60             |                                     |              |
| microsatellite                                                      | AHT053   | 9              | F: CACTCATCAAGCCATGCTGT<br>R: TGCCACAGAGTAGCTGATGC       | 286               | 2.0                    | 58             | Swinburne et al. 2003               | AJ507670     |
| microsatellite                                                      | AHT096   | 9              | F: CCCTATGCCAGGCACTGTAT<br>R: GATCTTATAGCTTCTCACTACA     | 241-251           | 2.0                    | 58             | Swinburne et al. 2003               | AJ507713     |
| microsatellite                                                      | AHT104   | 9              | F: CACTGAACTCACAGAAATGGAGAG<br>R: TAACCATGCTGTCCATTACATC | 149-151           | 1.5                    | 58             | Swinburne et al. 2003               |              |
| ankyrin repeat domain 46                                            | ANKRD46  | 9              | F: GCTTTGACCCAAACATTCGT<br>R: TATCCACATGGCCACAGAGA       | 165               | 1.5                    | 60             |                                     | CX599917     |
| microsatellite                                                      | ASB05    | 9q16-q18       | F: TCGAGGAGCTCATGACCTGG<br>R: TTGTACA ACTCTCCACCATAGC    | 115               | 2.0                    | 58             | Breen et al. 1997*                  | X95320       |
| microsatellite                                                      | ASB21    | 9              | F: TCTTTGGGATTTTCCCTGCAGC<br>R: CTGATTGATGAGAAGAAGGC     | 168-178           | 2.0                    | 58             | Irvin et al. 1998; Lear et al. 1999 | X93535       |
| ATPase, H <sup>+</sup> transporting, lysosomal 38kDa, V0 subunit d2 | ATP6V0D2 | <b>9p15-14</b> | F: CCGAGCTGTACTTCAACGTG<br>R: CAGGGTCTCGCACTGGAC         | 113               | 1.5                    | 60             |                                     | CX594477     |
| ATPase, H <sup>+</sup> transporting, lysosomal 42kDa, V1 subunit C1 | ATP6V1C1 | 9              | F: ATTGATTGCAACTTGCTGGA<br>R: TGGACCACTACGGGAGAACT       | 170               | 1.5                    | 62             |                                     | CX597400     |
| antizyme inhibitor 1                                                | AZIN1    | 9              | F: TCATGGCATGTCAATTTTGC<br>R: CAGAACCACACACGTTACCT       | 313               | 2.0                    | 58             |                                     |              |
| carbonic anhydrase III, muscle specific                             | CA3      | 9              | F: CTGACCACTGGCATGAATTTT<br>R: CCGTTGTTCAGGATGGTCTT      | 151               | 1.5                    | 65             |                                     |              |
| coiled-coil-helix-coiled-coil-helix domain containing 7             | CHCHD7   | 9              | F: CAGGGAAAGCTGTTCCACTTAC<br>R: TATGGCATCTTTCCCATTGC     | 955               | 1.5                    | 58             |                                     | DN510885     |
| chromodomain helicase DNA binding protein 7                         | CHD7     | 9              | F: GTTTGACCGGCTTCTCACTGG<br>R: GCGGAGAGAGGGCTATTCAAC     | 366               | 1.5                    | 58             |                                     |              |
| chromatin accessibility complex 1                                   | CHRAC1   | 9              | F: CGATGAAGCCGAATCCTAAA<br>R: GTCGGGCTTACTTCCCTTTC       | 219               | 1.5                    | 58             |                                     | CX592924     |

|                                                                    |          |             |                                                            |              |     |    |                        |          |
|--------------------------------------------------------------------|----------|-------------|------------------------------------------------------------|--------------|-----|----|------------------------|----------|
| COP9 constitutive photomorphogenic homolog subunit 5 (Arabidopsis) | COPS5    | 9           | F: GAAAATGCAATTGGCTGGTA<br>R: CTAAAGGCGCCAAGATTAC          | 807          | 1.5 | 60 |                        |          |
| microsatellite                                                     | COR008   | 9           | F: TAAGTGCTGAGTCTGGGACC<br>R: TGGTAGATAGCGTCTGGAGG         | 240-264      | 1.5 | 58 | Hopman et al. 1999     | AF083451 |
| microsatellite                                                     | COR013   | 9           | F: TTCCCCTGGGTCCTAAATAC<br>R: CCTTTTCCCCATAGGTCTGT         | 248-254      | 2.0 | 58 | Hopman et al. 1999     | AF083456 |
| microsatellite                                                     | COR093   | 9           | F: GAACCTGGGCTGCTGAAG<br>R: GGCACCAAAAGGGAATTAGT           | 251-263      | 2.0 | 55 | Tallmadge et al. 1999b | AF154946 |
| microsatellite                                                     | COR098   | 9           | F: GCAACAGATGTTGGCTCAG<br>R: GGAGATGTCCTTGACCACAG          | 235-251      | 2.0 | 58 | Tallmadge et al. 1999b | AF154951 |
| cysteine-rich secretory protein LCCL domain containing 1           | CRISPLD1 | 9           | F: GGGCAGCCAGAACTTTGTAT<br>R: AGGTACCACAATATGGCAACA        | 195          | 1.5 | 60 |                        | CX594553 |
| eukaryotic translation initiation factor 3, subunit 6              | EIF3S6   | 9           | F: CATGTTGGCAGACAAACTGAA<br>R: GGCCAACATCTGGCTTCTAA        | 196 + Intron | 1.5 | 60 |                        |          |
| exostoses (multiple) 1                                             | EXT1     | 9           | F: AGCTGGTTTGGCTACATGC<br>R: CAAAGTCGCTCAATGTCTCG          | 113          | 1.5 | 58 |                        |          |
| fatty acid binding protein 4                                       | FABP4    | 9           | F: ATAAGCCAAGGGACGTTGAG<br>R: AACAACACAACCAGGCTGAA         | 153          | 1.5 | 60 |                        |          |
| fatty acid binding protein 5                                       | FABP5    | 9           | F: GGAATGGGATGGGAAGGAA<br>R: CCCTGTCCAAAATGATGCT           | 850          | 1.5 | 58 |                        |          |
| ganglioside-induced differentiation-associated protein 1           | GDAP1    | <b>9p13</b> | F: CATTGATTATCTTGAACAGAC<br>R: AGCACTAAACCACCATCATG        | 214-222      | 1.5 | 54 | Blechynden et al. 2002 |          |
| gamma-glutamyl hydrolase                                           | GGH      | 9           | F: TTGAAGAGGATAAAGCGCTGA<br>R: CGCCATGAGAGGCAAGTTAT        | 165          | 1.5 | 62 |                        | CX603845 |
| microsatellite                                                     | HMS03    | 9           | F: CCAACTCTTTGTACATAACAAGA<br>R: CCATCCTCACTTTTTCACCTTTGTT | 151-169      | 2.0 | 58 | Guérin et al. 1994     | X74632   |
| microsatellite                                                     | HTG04    | 9           | F: CTATCTCAGTCTTGATTGCAGGAC<br>R: CTCCTCCCTCCCTCTGTTCTC    | 129-139      | 3.0 | 58 | Ellegren et al. 1992   | AF169165 |
| microsatellite                                                     | HTG08    | 9           | F: CAGGCCGTAGATGACTACCAATGA<br>R: TTTTCAGAGTTAATTGGTATCACA | 188          | 3.0 | 58 | Marklund et al. 1994   | AF169292 |
| KIAA0196                                                           | KIAA0196 | 9q16-q17    | F: AGCACACGTGCCTAATTTCA<br>R: TGCAGTTATATGAGCGGTTGA        | 151          | 1.5 | 58 |                        | CX596975 |



|                                                                |        |                |                                                                |         |     |    |                        |          |
|----------------------------------------------------------------|--------|----------------|----------------------------------------------------------------|---------|-----|----|------------------------|----------|
| Kruppel-like factor 10                                         | KLF10  | 9              | F: AGAATCTGCTTCCGGGTACA<br>R: ACTGGGCTCTTCTCCTCCTC             | 304     | 1.5 | 60 |                        | CX605713 |
| microsatellite                                                 | LEX019 | 9              | F: TTCCCTTTTTCCTCACATCCT<br>R: TTTTAGGTTTCATCTATGTTGTTGC       | 157-161 | 3.0 | 58 | Coogle et al. 1996     | AF075621 |
| microsatellite                                                 | LEX070 | 9              | F: CATCTCATAACCGTGGATTGA<br>R: ATTCGCCTCTTGACAGTCTG            | 233-250 | 2.0 | 58 | Coogle et al. 1999     |          |
| leucine rich repeat containing 14                              | LRRC14 | 9              | F: GTTTACCCGCAGATCCACAC<br>R: CTTCCCTCTGCTGTTCAAGG             | 617     | 1.5 | 58 |                        |          |
| lymphocyte antigen 6 complex, locus H                          | LY6H   | 9              | F: TGCATGTGAGTGACTGCTTG<br>R: ACCTAGAAGTGCGGGATGTG             | 350     | 2.0 | 58 |                        | BI395116 |
| MCM4                                                           | MCM4   | <b>9p13-12</b> | F: TGTAGACATGAGGAAGATTGGTAG<br>R: CAGTCCGGGGATCAGTTG           | 194     | 1.5 | 60 |                        | DN506988 |
| minichromosome maintenance deficient 4                         | MTDH   | <b>9q14</b>    | F: CCAGACGGGAAACGTGAATA<br>R: CCCAAATGTCTTCCAGCACT             | 239     | 1.5 | 60 |                        | CX594650 |
| metadherin                                                     | MYC    | <b>9q16</b>    | F: GGTGAACCAGAGCTTCATCTG<br>R: AGGTACAAGCTGGAGGTGGAG           | 205     | 1.5 | 55 | Perrocheau et al. 2005 | AY817477 |
| v-myc                                                          | NBN    | <b>9q13-14</b> | F: GCAGAATGGCCTTTTCCTTAAC<br>R: TCCTCCAAGTTGCAATACAGC          | 644     | 1.5 | 60 |                        |          |
| myelocytomatosis viral oncogene homolog                        | NOV    | 9              | F: AGAAGAAGCAGAGCATATCAGCAGA<br>R: CTTGTTCGTGAGTTTGCATAATTATGG | 243     | 2.0 | 58 |                        |          |
| nibrin                                                         | NSMAF  | <b>9p13</b>    | F: TGGCAGAGAGTAGCTGAGAG<br>R: GCTAATCCTTCCCCAGGTTC             | 231     | 1.5 | 58 |                        |          |
| nephroblastoma overexpressed gene                              | NUDCD1 | 9              | F: CTCCCATGTCCACTGTCCTT<br>R: CCAGCCACCACTGAATACCT             | 236     | 1.5 | 60 |                        | DN509026 |
| neutral                                                        | PENK   | 9              | F: TGGAGTAACTTTTCGCCTTCTTC<br>R: GGGCTTCATGAGAGGCTTAAA         | 194     | 1.5 | 55 | Perrocheau et al. 2006 | DX010554 |
| sphingomyelinase activation associated factor                  | PKIA   | 9              | F: CCTGGCTGGAATGCATTTAT<br>R: ACATCCAAACACAAGCCACA             | 181     | 1.5 | 60 |                        |          |
| NudC domain containing 1                                       | PPM2C  | 9              | F: GTAAGGAGGCGTCCAAACTG<br>R: CTTGAGCCTCCAAGGAGATG             | 156     | 1.5 | 60 |                        |          |
| proenkephalin                                                  | PRKDC  | 9p12           | F: ACATGGCACCACCTCATCAAA<br>R: CGCAATGTGCACAATTAACC            | 187     | 2.0 | 58 | Bailey et al. 1997;    | U97529   |
| protein kinase inhibitor alpha                                 |        |                |                                                                |         |     |    |                        |          |
| protein phosphatase 2C, magnesium-dependent, catalytic subunit |        |                |                                                                |         |     |    |                        |          |
| protein kinase, DNA-activated, catalytic                       |        |                |                                                                |         |     |    |                        |          |

|                                |        |          |                                                        |         |     |    |                         |          |
|--------------------------------|--------|----------|--------------------------------------------------------|---------|-----|----|-------------------------|----------|
| polypeptide                    |        |          |                                                        |         |     |    | Caetano et al. 1999*    |          |
| RAD21 homolog (S. pombe)       | RAD21  | 9        | F: GCAATATTGGCGCATGTAATAA<br>R: ACCATCCCTAAGCACAGTTGTT | 213     | 1.5 | 59 |                         | CX595401 |
| ring finger protein 19         | RNF19  | 9q14     | F: AAGGCAAGCTCACAGATGAAG<br>R: CAAGAATTCTCTGAAGGAACCAA | 218     | 1.5 | 55 | Perrocheau et al. 2006* | DX010467 |
| ribosomal protein L7           | RPL7   | 9        | F: AAGCGAATTGCCCTGACAGA<br>R: CCACAGGAAGTTGTTTGCTTCT   | 500     | 1.5 | 58 |                         |          |
| ribosomal protein L8           | RPL8   | 9        | F: AAGGCAAAGAGGAACTGCTG<br>R: TTTATTGAGCCCCAACACT      | 617     | 1.5 | 58 |                         | CX604741 |
| ribosomal protein S20          | RPS20  | 9        | F: GAAAGGACCAGTTCGGATGC<br>R: CACGTCTTGGAACCTTCACC     | 503     | 1.5 | 58 |                         |          |
| scribbled homolog (Drosophila) | SCRIB  | 9        | F: GGAGCTGGTCCTACTTGTGC<br>R: TTGGAGATAAAGATGCCCTCA    | 165     | 1.5 | 55 |                         |          |
| snail homolog 2 (Drosophila)   | SNAI2  | 9p12-p11 | F: ACAAGCAGCTGCACTGTGAC<br>R: TGAGTTCTGATGTGTCTTGC     | 184     | 1.5 | 55 | Perrocheau et al. 2006* | DX010585 |
| TGFB-induced factor            | TG     | 9q16     | F: AGTGATGGGGATGCTCTCTG<br>R: GCTTGCTCGGCCTGTACTTA     | 210     | 2.0 | 58 | Caetano et al. 1999     | AF130785 |
| microsatellite                 | TKY291 | 9        | F: TCTGACTTGTTGTTGGAGTG<br>R: AACTCAACACCATGTTCTGC     | 81-85   | 1.5 | 58 | Tozaki et al. 2000b     |          |
| microsatellite                 | TKY293 | 9        | F: CACAAACGTACTGTTACGGC<br>R: ATAGACCACCGGAAACTGAG     | 78-90   | 1.5 | 58 | Tozaki et al. 2000b     |          |
| microsatellite                 | TKY452 | 9        | F: TATTATGCCACCAGGCCAGT<br>R: TGACCATGGTGAACCAGAGA     | 266-278 | 1.5 | 55 | Tozaki et al. 2004      | AB103670 |
| microsatellite                 | TKY453 | 9        | F: CTTGTGGAAAAGTTGCATGG<br>R: GACATGGCACATTCATGGAC     | 232-258 | 1.5 | 58 | Tozaki et al. 2004      | AB103671 |
| microsatellite                 | TKY457 | 9        | F: GCCTCAAAGTTGGGTGAAAA<br>R: ACTCCCTTTCCGAGATTGGT     | 273-287 | 1.5 | 58 | Tozaki et al. 2004      | AB103675 |
| microsatellite                 | TKY465 | 9        | F: CCTACACACTGCTCTTCAAG<br>R: TCAAGGGTAATAACCTGCTG     | 196     | 2.0 | 58 |                         | AB103683 |
| microsatellite                 | TKY505 | 9        | F: ACACCAAATTTTCCCACACA<br>R: TCTGTGCCACACAACCTTA      | 195-213 | 1.5 | 58 |                         | AB103723 |
| microsatellite                 | TKY529 | 9        | F: AGCATCCCTTTCTTCCCACT<br>R: GGAAAGAGGTGCTGGTTGAG     | 146-158 | 1.5 | 58 | Tozaki et al. 2004      |          |
| microsatellite                 | TKY533 | 9        | F: CACTCTCCAGCTGGGTAGC<br>R: AGGTGATGGGCTGGATACAC      | 232-240 | 1.5 | 58 | Tozaki et al. 2004      | AB103751 |
| microsatellite                 | TKY540 | 9        | F: TCCCACAACAGTTCCTCTCC                                | 166-192 | 1.5 | 58 | Tozaki et al.           | AB103758 |

|                |         |   |                                                                                |         |     |    |                               |          |
|----------------|---------|---|--------------------------------------------------------------------------------|---------|-----|----|-------------------------------|----------|
| microsatellite | TKY627  | 9 | R: GAGATTGTGGGGGCATCTTA<br>F: GTGGGATAGGAGGGAGAGGA<br>R: CGAAGAGCTTGCTAGTTACCC | 215-227 | 1.5 | 58 | 2004<br>Tozaki et al.<br>2004 |          |
| microsatellite | TKY676  | 9 | F: ACCATGTTTCTGAAACACTC<br>R: ACCATTGCTTGAGCTAATTC                             | 192     | 2.0 | 58 |                               | AB103894 |
| microsatellite | TKY699  | 9 | F: TGA CTGACATGTATACTGGT<br>R: AACTGACACAGGTTTCAGTC                            | 132     | 2.0 | 58 |                               | AB103917 |
| microsatellite | TKY714  | 9 | F: AATTCACCTATGTATG<br>R: CGGGATAGACTGATCCATTG                                 | 106     | 2.0 | 58 |                               | AB103932 |
| microsatellite | TKY805  | 9 | F: TGCCTTTTTCTCTCATCACC<br>R: AGACTAGTCTGCAAGTTCAG                             | 199     | 2.0 | 58 | Tozaki et al.<br>2004         | AB104023 |
| microsatellite | TKY878  | 9 | F: GCTTAGCATAATGTCCAAGC<br>R: TCACAATAGCCAAGACATGG                             | 203     | 2.0 | 58 | Tozaki et al.<br>2004         | AB104096 |
| microsatellite | TKY879  | 9 | F: CTCAATGCTCTCGAAAGTCC<br>R: TGCAGCCAGACTGAGAAG                               | 243     | 2.0 | 58 |                               | AB104097 |
| microsatellite | TKY895  | 9 | F: CTGGGTAGACTGGAACATG<br>R: TCTATAATCACCTGTGGGAG                              | 90      | 2.0 | 58 |                               | AB104113 |
| microsatellite | TKY916  | 9 | F: TCTGATAACAGCAATGCCAG<br>R: AAACAGAACTAAGTGGCCAG                             | 119     | 2.0 | 58 | Tozaki et al.<br>2004         | AB104134 |
| microsatellite | TKY939  | 9 | F: GAGCAAGTGTGAAGTAATGC<br>R: AATTTTCCCCACAGTGTCAG                             | 286     | 2.0 | 58 | Tozaki et al.<br>2004         | AB104157 |
| microsatellite | TKY1010 | 9 | F: AAGAGAAGCTGTGGATATGG<br>R: TTGTGGATACCAGAGAAGTG                             | 253     | 2.0 | 58 |                               | AB104228 |
| microsatellite | TKY1138 | 9 | F: GAAGATTGGCAACAGATGTTG<br>R: AGTAAACCCTGCTTGAGTAG                            | 174     | 2.0 | 58 |                               | AB104356 |
| microsatellite | TKY1831 | 9 | F: ACAAGATGGGTGTAAGTAGT<br>R: ATGCTTTTCCATTGGACAGT                             | 186     | 1.5 | 58 | Tozaki et al.<br>2007         | AB215774 |
| microsatellite | TKY1884 | 9 | F: ATGAATGAAAGCCATTCTCC<br>R: TATTCTGACCAATCACTTCC                             | 243     | 1.5 | 58 | Tozaki et al.<br>2007         | AB215827 |
| microsatellite | TKY2223 | 9 | F: TAAGCAGGAAAGAGAAAGAC<br>R: TGTTATCTCCCTTTCTGACT                             | 208     | 1.5 | 58 | Tozaki et al.<br>2007         | AB216166 |
| microsatellite | TKY2231 | 9 | F: CAACAGAAGAAACGAGCGAG<br>R: CAATGGAACCTCTGCCTTTG                             | 129     | 1.5 | 58 | Tozaki et al.<br>2007         | AB216174 |
| microsatellite | TKY2459 | 9 | F: AATGCATTTTGTGCACCCG<br>R: TTTGGGTTGTCTTTTTCCAG                              | 172     | 1.5 | 58 | Tozaki et al.<br>2007         | AB216402 |
| microsatellite | TKY2519 | 9 | F: TCCTTTTAGGGACACAGTGC<br>R: CCAAATCAAGCAGCTGATAA                             | 223     | 1.5 | 58 | Tozaki et al.<br>2007         | AB216462 |

|                                                |         |   |                                                            |         |     |    |                        |          |
|------------------------------------------------|---------|---|------------------------------------------------------------|---------|-----|----|------------------------|----------|
| microsatellite                                 | TKY2750 | 9 | F: ACTTGGAAGGGACCTGAGAG<br>R: GATCTCAGAAGGAGGGCTTC         | 178     | 1.5 | 60 | Tozaki et al. 2007     | AB216693 |
| microsatellite                                 | TKY2751 | 9 | F: CTACACTACAATTTGGGCAC<br>R: GTCACCTCCCCAGGAATCTC         | 247     | 1.5 | 60 | Tozaki et al. 2007     | AB216694 |
| microsatellite                                 | TKY2874 | 9 | F: TCTGCAGGAAAAGCAGTCTT<br>R: CCCTCTTTGAACTCCCAA           | 172     | 1.5 | 58 | Tozaki et al. 2007     | AB216817 |
| translocation associated<br>membrane protein 1 | TRAM1   | 9 | F: TCTGTGGGCAGTCTTGTGTTG<br>R: AAAGCAGAATGTTCCCTCCA        | 559     | 1.5 | 60 |                        |          |
| thyrotropin-releasing<br>hormone receptor      | TRHR    | 9 | F: CTTTGTCTGGGCTTTCACATC<br>R: TGAATCCGTAGAGGACAGTGG       | 200     | 1.5 | 55 | Perrocheau et al. 2006 | DX010603 |
| microsatellite                                 | UM037   | 9 | F: TCATTTTATCCTCCACCTC<br>R: AAAAGGGCGTAATATGG             | 108-118 | 2.0 | 58 | George et al. 1998     | AF195582 |
| microsatellite                                 | UMNe103 | 9 | F: GGTAAATTAATCCAAGGTATTTTATTC<br>R: AGAGGAAGACTGGCACAGATG | 152     | 1.5 | 58 | Mickelson et al. 2003  | AF536248 |
| microsatellite                                 | UMNe123 | 9 | F: CTCCAATTCTGCCTAGCAG<br>R: GGGGCCATAGGTAGACTTTAGG        | 156     | 1.5 | 58 | Mickelson et al. 2003  | AF536255 |
| microsatellite                                 | UMNe155 | 9 | F: GAAAGAGAAGAACCCAGCCC<br>R: TAATCTTTGAAAGTGACGCGC        | 135     | 1.5 | 62 | Mickelson et al. 2003  | AF536267 |
| microsatellite                                 | UMNe189 | 9 | F: GATCAAATACCCTCTGCAAAGC<br>R: GGCTTCATATCCTCCCTTACC      | 148     | 2.0 | 58 | Mickelson et al. 2004  |          |
| microsatellite                                 | UMNe204 | 9 | F: TAATTAATGTAGCGCCAACCTG<br>R: TCCAAGCAAAGATAAACAGTGG     | 125     | 2.0 | 58 | Mickelson et al. 2003  | AF536287 |
| microsatellite                                 | UMNe212 | 9 | F: CCACATAATCACATGGGTGC<br>R: GCTCCACTCATAGCTGAGGG         | 105     | 2.0 | 58 | Mickelson et al. 2003  | AF536294 |
| microsatellite                                 | UMNe322 | 9 | F: TCATGTGAGGCTCCTCTGG<br>R: TTCATAAATCATCGTTAATGCCA       | 105     | 1.5 | 58 |                        |          |
| microsatellite                                 | UMNe342 | 9 | F: TCCACTCTCCCAAACCTCTG<br>R: TGCAGCTATCATTTTACCATGG       | 207     | 2.0 | 58 | Mickelson et al. 2004  | AY731388 |
| microsatellite                                 | UMNe393 | 9 | F: CAAATTTCTTAAGGCCTTACCC<br>R: CCTAACGAGAATGTGAGGAGG      | 163     | 2.0 | 62 |                        |          |
| microsatellite                                 | UMNe438 | 9 | F: GATGGTTCACGCTTTTCACC<br>R: CTCTGGGTGATTTATTGGAACC       | 254     | 1.5 | 58 |                        |          |
| microsatellite                                 | UMNe493 | 9 | F: GAACAGAAGGAAAAGCCATCC<br>R: ATGGAAGCTTTGCTCCTAAGG       | 108     | 1.5 | 55 | Mickelson et al. 2004  | AY731403 |
| microsatellite                                 | UMNe496 | 9 | F: AGCCCCCAAATTCTCAG<br>R: GAAGCTGGTGAACAAAAGGC            | 154     | 1.5 | 58 |                        |          |
| microsatellite                                 | UMNe507 | 9 | F: TGTCCAGCTGAGCCCTTC                                      | 200     | 1.5 | 60 | Wagner et              | AY464510 |

|                                                  |         |      |                                                                                |       |     |    |                           |          |
|--------------------------------------------------|---------|------|--------------------------------------------------------------------------------|-------|-----|----|---------------------------|----------|
| microsatellite                                   | UMNe518 | 9    | R: TGTGTATGTGTGTGCATGTGC<br>F: TGGCCAAAAAATCTCATATCC<br>R: GCCTTAGCACCCTGACTGG | 296   | 1.5 | 58 | al. 2004b                 |          |
| microsatellite                                   | UMNe540 | 9    | F: ATTCTCAGGTGACCAATCGC<br>R: AAAATTTCCCAGGGTGTTC                              | 371   | 1.5 | 58 |                           |          |
| microsatellite                                   | UMNe577 | 9    | F: CCGTGCCTTTTTCTCTCATC<br>R: ATGAATGGTTACTGGTGACCG                            | 250   | 1.5 | 58 | Wagner et al. 2004c       | AY735278 |
| microsatellite                                   | UMNe580 | 9    | F: CCCTGTTGCCACCAACTC<br>R: ACAACCCAAGTGTCTTGATG                               | 242   | 1.5 | 58 | Wagner et al. 2004c       | AY735280 |
| ubiquinol-cytochrome c reductase binding protein | UQCRB   | 9    | F: TGCAGATGATACAATACATGAGA<br>R: TTTGTCCACTGCTCTTTAGGC                         | 151   | 1.5 | 60 |                           | DN504187 |
| microsatellite                                   | VHL126  | 9    | F: GACCCAACATTGTATGTAAGCG<br>R: TGTGAATAGATATAAGTTGCTTGC                       | 85-87 | 2.0 | 58 | van Haeringen et al. 1998 | Y08447   |
| microsatellite                                   | VHL219  | 9q16 | F: ACTTATTGGTTTATCTTTGCCATC<br>R: CTACATCTCAGTGTTCTTATCTG                      | 100   | 1.5 | 62 | van Haeringen et al. 1998 |          |
| zinc finger protein 706                          | ZNF706  | 9    | F: GACACCTTTGACTCTTCTCAGACCTT<br>R: TTTATAACAAGGATGGACTGATTTTCAG               | 203   | 2.0 | 58 |                           |          |

| Name                                                         | Symbol  | Horse chr. | Primers                                                | Product size (bp) | MgCl <sub>2</sub> (mM) | T <sub>a</sub> | Reference                                     | Accession No |
|--------------------------------------------------------------|---------|------------|--------------------------------------------------------|-------------------|------------------------|----------------|-----------------------------------------------|--------------|
| sequenced tagged site                                        | 10STS01 | 10         | F: GGGATAGCAGAACCACCAAA<br>R: CATCACTGTGGTTGGCTTGA     | 235               | 1.5                    | 58             |                                               | AB218742     |
| sequenced tagged site                                        | 10STS02 | 10         | F: CCCACTTTGTAGTGACGTG<br>R: ACCCAGAGTATTCCATAGCTTG    | 755               | 1.5                    | 60             |                                               |              |
| sequence tagged site                                         | 10STS03 | 10         | F: CCTTCAGGAACATCAAGACC<br>R: CGTTCAGTTCGTCCTTCT       | 196               | 1.5                    | 58             |                                               |              |
| microsatellite                                               | AHT015  | 10p13dist  | F: GGGTCCTGAGCAGGTCTTTT<br>R: GAAGTAATGGCGGTCATGCT     | 139-154           | 2.0                    | 58             | Swinburne et al. 1997; Chowdhary et al. 2003* |              |
| microsatellite                                               | AHT049  | 10         | F: TAATTGCCAAATACCACACAAA<br>R: TGTCTTGTTCTCAGGCTCT    | 296-311           | 1.5                    | 58             | Swinburne et al. 2003                         |              |
| microsatellite                                               | AHT086  | 10         | F: CCCAATGAAGTCCAAGATGG<br>R: GAAATCTCTAGCAAGACCCAGG   | 195-216           | 2.0                    | 58             | Swinburne et al. 2003                         | AJ507703     |
| microsatellite                                               | AHT126  | 10         | F: GGTTCCCAGGCACAACCTACA<br>R: TTTCCAAAAGGGACATGAGG    | 166-180           | 1.5                    | 58             | Swinburne et al. 2005                         |              |
| microsatellite                                               | AHT132  | 10         | F: GATTCTTCTGCCACCAGAA<br>R: GGAATTCTTCACAAAGAAGACCT   | 153-169           | 1.5                    | 58             | Swinburne et al. 2005                         |              |
| adenosylmethionine decarboxylase 1 arginase                  | AMD1    | 10q21      | F: TGCTGTGTTGAGGACCAGTGC<br>R: AGTCCAACACCAGGAAGAGAGAA | 267               | 2.0                    | 58             | Lear et al. 2001*                             | G62175       |
|                                                              | ARG1    | 10         | F: TGAAGAAAGGTGGGACATCA<br>R: TTTGCCAAAATGGGAAATGT     | 236               | 2.0                    | 58             | Chowdhary et al. 2003                         |              |
| microsatellite                                               | ASB06   | 10p13      | F: GGCACAGATGTTAGCTCAGC<br>R: ATGGAACCAGCCTGGATTGC     | 198               | 1.5                    | 65             | Breen et al. 1997*                            | X95321       |
| microsatellite                                               | ASB09   | 10q21-q23  | F: GTGCGCATGTATGTGCGTGCC<br>R: ATTTCCACAAGGGACATGAGG   | 94                | 3.0                    | 58             | Breen et al. 1997*                            | X95324       |
| aurora kinase C                                              | AURKC   | 10         | F: TCGATGACTTTGAAATCGGG<br>R: CAGTCCTTCCTTCTCTATCTG    | 134               | 1.5                    | 58             |                                               | CK463294     |
| branched chain keto acid dehydrogenase E1, alpha polypeptide | BCKDHA  | 10p13      | F: GAGAACCAGCCCTTCCTCAT<br>R: TTCTTGCGGGACTGCTTCCT     | 436               | 1.5                    | 60             | Brinkmeyer-Langford et al. 2005*              | J03759       |
| chromosome 19 open reading frame 2                           | C19orf2 | 10p15      | F: AGAATTTTTGTGCGCCCTCCT<br>R: TTTTCTGCTGCAATCTGGC     | 153               | 1.5                    | 60             | Brinkmeyer-Langford et al. 2005*              | CK464292     |

|                                               |                  |       |                                                        |     |     |    |                                              |          |
|-----------------------------------------------|------------------|-------|--------------------------------------------------------|-----|-----|----|----------------------------------------------|----------|
| complement component 5a receptor 1            | C5AR1 (C5R1)     | 10    | F: ACTACACGTTATCCGGGTCG<br>R: ATCTGGTGCCAGAACTACCG     | 144 | 2.0 | 58 | Pascual et al. 2002                          | BI395175 |
| calpain, small subunit 1                      | CAPNS1           | 10    | F: TGAGGCCAATGAGAGTGAG<br>R: CCATCAGTCTTCAGATCAGG      | 408 | 1.5 | 58 | Brinkmeyer-Langford et al. 2005              | BP434626 |
| CASP8 associated protein 2                    | CASP8AP2         | 10    | F: GATTTGCTTCCCCTGTTATTGGTC<br>R: ATCCTTGGCTACGCAAAGCC | 336 | 2.0 | 60 | Chowdhary et al. 2003                        | G62191   |
| CD164 molecule, sialomucin                    | CD164            | 10    | F: GAGTGCTGCAAGGATACAAG<br>R: CAAAGACACAGGGAGAAAGG     | 290 | 1.5 | 60 |                                              |          |
| CCAAT/enhancer binding protein (C/EBP), gamma | CEBPG            | 10p15 | F: GCCCATGGATCGAAACAG<br>R: TGCTTCCAAGCGATCATTC        | 151 | 1.5 | 58 | Perrocheau et al. 2006*                      |          |
| glycoprotein hormones, alpha polypeptide      | CGA              | 10q23 | F: TGACAGCGTGCTCTTGTTTC<br>R: TCCCACCTGCATCTAAGTCC     | 186 | 2.0 | 58 | Caetano et al. 1999; Milenkovic et al. 2002* | AF130749 |
| BAC end sequence                              | CH241-100C6_SP6  | 10    | F: GCAGCACAATTACAGATGG<br>R: GTCTCCTTTTGCTGTCC         | 261 | 1.5 | 57 |                                              | AJ542789 |
| BAC end sequence                              | CH241-100D21_SP6 | 10    | F: ATTACACGCTCTGGGTTTGAG<br>R: TATTTGCCAACGATTTACAG    | 166 | 1.5 | 60 |                                              | AJ542818 |
| BAC end sequence                              | CH241-100E2_SP6  | 10    | F: TAGACCCTTGGTGGCATC<br>R: CAAGATCTTTGTGCCTCATC       | 206 | 1.5 | 60 |                                              | AJ542867 |
| BAC end sequence                              | CH241-100J10_T7  | 10    | F: GCAGCTGTTTTACAGGAGAG<br>R: TCTGACTTGGCTTCAACTGC     | 162 | 1.5 | 60 |                                              | AJ543029 |
| BAC end sequence                              | CH241-100N24_SP6 | 10    | F: CTTCCACAACCCTGAAGAGC<br>R: GTCTCAATGCCCAGTGTCTG     | 215 | 1.5 | 58 |                                              | AJ543219 |
| BAC end sequence                              | CH241-101E16_T7  | 10    | F: AGAATGATCCCTCGGATG<br>R: TGGGTGATTCTCCACAAC         | 213 | 1.5 | 59 |                                              | AJ576607 |
| BAC end sequence                              | CH241-101F16_T7  | 10    | F: TGGCTCCCAGAAAGTTTCAC<br>R: CGTGGAGTTGGAGAGTGTTG     | 227 | 1.5 | 60 |                                              | AJ576648 |
| BAC end sequence                              | CH241-101G24_T7  | 10    | F: GCGCTTGATTGTCAATTTG<br>R: GAATCCTTGGGAATTCCTG       | 249 | 1.5 | 56 |                                              | AJ576705 |
| BAC end sequence                              | CH241-101L6_SP6  | 10    | F: TGTCGCTGAACTTTCTTCC<br>R: AATGGTGCTGGATTCTCC        | 282 | 1.5 | 59 |                                              | AJ576917 |
| BAC end sequence                              | CH241-101M4_T7   | 10    | F: GATTTAGGGCAGGCAGAC<br>R: GGAGACGTTGCTGTGATG         | 290 | 1.5 | 61 |                                              | AJ576958 |
| BAC end sequence                              | CH241-102A14_SP6 | 10    | F: TTTCTACGAAGCACAGC<br>R: TTCAAGGAAGGGAAATGC          | 216 | 1.5 | 56 |                                              | AJ583945 |

|                                                         |                  |           |                                                      |         |         |    |                                                   |          |
|---------------------------------------------------------|------------------|-----------|------------------------------------------------------|---------|---------|----|---------------------------------------------------|----------|
| BAC end sequence                                        | CH241-102D7_SP6  | 10        | F: TGGCAGTTCTACCCAAATC<br>R: TTGCAATTGTGTATGTTTGC    | 204     | 1.5     | 58 |                                                   | AJ584104 |
| BAC end sequence                                        | CH241-102D24_SP6 | 10        | F: TGGGGGAAATTATTGGAG<br>R: ACCACCTTTCCATTTTGG       | 227     | 1.5     | 57 |                                                   | AJ584092 |
| creatine kinase, muscle                                 | CKM              | 10p13     | F: AGGTGTGGACAACCCAGGTA<br>R: GAGCACAGCACCAATAGCAC   | 200     | 3.0     | 58 | Caetano et al. 1999;<br>Chowdhary et al. 2003*    | AF130753 |
| cleft lip and palate associated transmembrane protein 1 | CLPTM1           | 10        | F: GATGAAGAGCTGTGGTCGTG<br>R: ATTCAGGGAGATCCTGATGC   | 225     | 2.0     | 58 | Pascual et al. 2002                               | BI395231 |
| cannabinoid receptor 1 (brain)                          | CNR1             | 10        | F: GCAATTGTGATTGCTGTGCT<br>R: ACCACAAGGATCAGGACCAG   | 338     | 2.0     | 58 |                                                   | AY011612 |
| collagen, type X, alpha 1                               | COL10A1          | 10q21-q22 | F: CGACCCAAGAAGTGAATCT<br>R: ACCCGGTCATTTTCTGTGAG    | 204     | 1.5-3.0 | 65 | Caetano et al. 1999;<br>Mariat et al. 2001*       | AF130754 |
| microsatellite                                          | COR015           | 10p13prox | F: GGTGTGGAAACATTCCGTAT<br>R: ACTGCATGTGTGGGAGAGAT   | 217-237 | 1.5     | 60 | Hopman et al. 1999;<br>Chowdhary et al. 2003*     | AF083458 |
| microsatellite                                          | COR020           | 10        | F: TCTCTACCGCAAGTGAAACC<br>R: CTGAATTGTAGGACATCCCG   | 150-164 | 1.5     | 60 | Hopman et al. 1999                                | AF083463 |
| microsatellite                                          | COR045           | 10p13dist | F: TCTCTACCGCAAGTGAAACC<br>R: CTGAGCCCTTAACCTGTGGA   | 150-164 | 3.0     | 65 | Ruth et al. 1999;<br>Chowdhary et al. 2003*       | AF108362 |
| microsatellite                                          | COR048           | 10p14-p13 | F: GATTGGGATGCAAAGATGAG<br>R: CAAGAGGATTGGGAACAAAGG  | 167-189 | 2.0     | 58 | Ruth et al. 1999;<br>Chowdhary et al. 2003*       | AF108365 |
| microsatellite                                          | COR083           | 10p13prox | F: TCATCCTTGGGACTGTACTTG<br>R: AGTGTTTGTGTTCCCTGCCTC | 272     | 1.5     | 58 | Tallmadge et al. 1999b;<br>Chowdhary et al. 2003* | AF154936 |
| microsatellite                                          | COR085           | 10        | F: GTCATGACGTCTGGCACTC<br>R: AGCTCCCATGTAGCCTCAC     | 150     | 1.5     | 58 | Tallmadge et al. 1999b                            | AF154938 |



|                                                  |         |           |                                                          |     |     |    |                                                           |          |
|--------------------------------------------------|---------|-----------|----------------------------------------------------------|-----|-----|----|-----------------------------------------------------------|----------|
| elongation of very long chain fatty acids-like 4 | ELOVL4  | 10q13     | F: TGGGCCTTAAGTCTAGCAGACA<br>R: AGCACATTTGCCTTTTTCTCC    | 107 | 1.5 | 55 | Perrocheau et al. 2006*                                   | DX010623 |
| epididymal sperm binding protein 1               | ELSPBP1 | 10        | F: AGTATGGGGGAAATTCCTTC<br>R: TCGGGCACCAGAGCTTGTT        | 108 | 1.5 | 55 | Brinkmeyer-Langford et al. 2005                           | AJ539176 |
| EPH receptor A7                                  | EPHA7   | 10        | F: GTCCCTTAAGTCTAGCAGACA<br>R: TGCTGTATAATGTACACTGCCT    | 151 | 1.5 | 58 |                                                           |          |
| ethylmalonic encephalopathy 1                    | ETHE1   | 10        | F: ACTGTCTGATCTACCCTGCTCA<br>R: TTGACAAACTCCTCACAGCTGA   | 823 | 1.5 | 58 | Brinkmeyer-Langford et al. 2005                           | BP434586 |
| F-box and leucine-rich repeat protein 4          | FBXL4   | 10        | F: TGGATCTGTGGAGGTGTAAGA<br>R: CCAGCTCTTCAATGTCTGTGT     | 213 | 1.5 | 59 |                                                           | CX598415 |
| four and a half LIM domains 5                    | FHL5    | 10        | F: CTGCTCTCACCAAGCACTTACT<br>R: ATGGTTGCAGGATCGTCTACT    | 109 | 1.5 | 58 |                                                           | CX594212 |
| ferritin, light polypeptide                      | FTL     | 10        | F: CCATGAAAGCCGCCATTGT<br>R: CCTCTGGATGTTGGTCAGATGG      | 353 | 1.5 | 58 |                                                           |          |
| FYN oncogenes                                    | FYN     | 10        | F: CCTTCCTGTTGGTTCCTGAC<br>R: CTGCTCGGAGGAAGAAATCC       | 164 | 1.5 | 58 |                                                           | CD528503 |
| gap junction protein, alpha 1                    | GJA1    | 10        | F: TGTGAGAGACTTAGAGGAAATGC<br>R: ACTCCTGAAACCTCTTTCAATCT | 250 | 1.5 | 58 |                                                           |          |
| glioma tumor suppressor candidate region gene 1  | GLTSCR1 | 10        | F: CTGGTCATCCAGAAGAACCT<br>R: GGTGTCAGCTGGTAGAGCTT       | 248 | 1.5 | 58 |                                                           | CK465846 |
| glucose phosphate isomerase                      | GPI     | 10p15     | F: CTGGGACATCAACAGCTTTG<br>R: GCTCCTGCTTGATGAAGTTG       | 261 | 1.5 | 58 | Milenkovic et al. 2002* ; Brinkmeyer-Langford et al. 2005 | X07382   |
| glycogen synthase 1 (muscle)                     | GYS1    | 10        | F: AAGGCTCGAATCCAGGAGTT<br>R: GGTCTTGTTCCAAGTTGAAGT      | 413 | 1.5 | 58 | Brinkmeyer-Langford et al. 2005                           | BX926004 |
| HBS1-like (S. cerevisiae)                        | HBS1L   | 10        | F: AAGAGATTACTGGCAAACCTTGG<br>R: CACCACTGAGACCACTCGTAG   | 630 | 1.5 | 59 |                                                           | DN508599 |
| histone deacetylase 2                            | HDAC2   | 10q21-q22 | F: CCTTTCAAGTTCCTCTTACA<br>R: CTCATCATTCAAATGGGAGATA     | 180 | 1.5 | 58 | Perrocheau et al. 2006*                                   |          |
| hairy/enhancer-of-split related with YRPW motif  | HEY2    | 10        | F: GAGCGGCTCCTTGAGAT<br>R: CCTACAGCGAAACCCGAC            | 141 | 1.5 | 58 |                                                           |          |

|                                                                                               |                              |              |                                                          |         |     |       |                                              |          |
|-----------------------------------------------------------------------------------------------|------------------------------|--------------|----------------------------------------------------------|---------|-----|-------|----------------------------------------------|----------|
| GLI-Kruppel family member HKR1                                                                | HKR1                         | 10           | F: AATGTGGACGAGGCTTTAC<br>R: TCCTTGCACACATAAGGCTTG       | 170     | 1.5 | 60    | Brinkmeyer-Langford et al. 2005              | CK834051 |
| microsatellite                                                                                | HMS23                        | <b>10p15</b> | F: GATCCAATATTGTAAACCCCGCC<br>R: CCTTCATAACCCTTATTGCAGCC | 95      | 1.5 | TD 60 | Godard et al. 1997                           | U89810   |
| heat shock transcription factor 2                                                             | HSF2                         | 10           | F: AGGGGAGTACAGCATCATCG<br>R: TCTGAGTTGGTTCTGGGTCC       | 102     | 2.0 | 58    |                                              |          |
| 5-hydroxytryptamine (serotonin) receptor 1B                                                   | HTR1B                        | 10q12        | F: CGCCCTTGACCTCTACTTTC<br>R: CGGCGGAGAGGTTGACTTGA       | 250     | 1.5 | 55    |                                              |          |
| inhibitor of Bruton agammaglobulinemia tyrosine kinase                                        | IBTK                         | 10           | F: TGAAAGAAAAGCTGTGGAAG<br>R: CACTTCAATCACTCATGATTTCC    | 250     | 1.5 | 58    |                                              | BM781379 |
| leukocyte immunoglobulin-like receptor, subfamily A (with TM domain), member 5                | LILRA5<br>( <i>ILT11</i> )   | 10p12        | F: TAAAGAGCGAAATCCAGTGC<br>R: AGTGGGGCCGAGATAGTAAC       | 125     | 1.5 | 58    | Takahashi et al. 2004*                       |          |
| killer cell immunoglobulin-like receptor with 3 domains and long cytoplasmic tail gene family | KIR3DL@<br>( <i>KIR3DL</i> ) | 10p12        | F: TGCAATCAGGACAAAATGTG<br>R: TCACAGGACCCAAGAAGAAG       | 150     | 1.5 | 58    | Takahashi et al. 2004*                       |          |
| kaptin (actin binding protein)                                                                | KPTN                         | 10           | F: CCAAGACCTCCGACAGAAAA<br>R: ATGAACGTGATCCCCACAAC       | 491     | 1.5 | 60    |                                              | BE236872 |
| laminin, alpha 2                                                                              | LAMA2                        | 10           | F: TCGATGAAGACAGAAGGCATA<br>R: TAACAAGGTTCCACACACAGC     | 150     | 2.0 | 63    |                                              |          |
| microsatellite                                                                                | LEX008                       | 10           | F: AAAGTGTGACAAACGGTTAGGAC<br>R: CGAAAAAGCCACTTGAGGTC    | 403-419 | 3.0 | 65    | Coogle et al. 1996                           | AF075611 |
| microsatellite                                                                                | LEX009                       | 10           | F: AAAGCCGTAAAGATTGGGACA<br>R: TCCATTGTGAGGGTGTAACA      | 366-379 | 3.0 | 58    | Coogle et al. 1996                           | AF075612 |
| microsatellite                                                                                | LEX062/066                   | 10p12        | F: GCTCTCAGTAACCTCGATGTT<br>R: ATTAAGGAGAAGGTGGAAAAGAC   | 209-215 | 3.0 | 65    | Coogle & Bailey 1999; Chowdhary et al. 2003* | AF075662 |
| leukocyte                                                                                     | LILRA@                       | 10p12        | F: GCCAGTACAGATGCTACGGT                                  | 450     | 1.5 | 55    | Takahashi et                                 |          |

|                                                              |          |           |                                                         |         |     |    |                                  |          |
|--------------------------------------------------------------|----------|-----------|---------------------------------------------------------|---------|-----|----|----------------------------------|----------|
| immunoglobulin-like receptor gene family                     | (LILRA)  |           | R: CCAGATCTCAGAGCGACATT                                 |         |     |    | al. 2004*                        |          |
| lipase, hormone-sensitive                                    | LIPE     | 10        | F: TTCCTGCAGACCATCTCCAT<br>R: CTGTATGATCCGCTCAAACCTC    | 266     | 1.5 | 55 | Brinkmeyer-Langford et al. 2005  | AJ000482 |
| mannosidase, alpha, class 1A, member 1                       | MAN1A1   | 10        | F: CAGGCTATAAAGGTTAAGCCAG<br>R: GAGAAAGGAGCCAGACACAG    | 162     | 1.5 | 58 |                                  |          |
| mannosidase, endo-alpha                                      | MANEA    | 10        | F: TTCAGTGCATACTGATTTTGACAG<br>R: CAGCTGCCTGTTTCTTAATGC | 120     | 1.5 | 58 |                                  | BM781108 |
| mitogen-activated protein kinase kinase kinase 7             | MAP3K7   | 10        | F: TGGCAACCTGAAATGTAAAACC<br>R: GCCCTAGAAAATCTCAGTGTCC  | 129     | 1.5 | 58 |                                  |          |
| malic enzyme 1                                               | ME1      | 10q12-q13 | F: GTGCAATTTTGGCCAGTGGC<br>R: CTTATCCGTGATATGCCTCAG     | 150     | 3.0 | 58 | Godard et al. 1998*              |          |
| mitochondrial ribosomal protein S12                          | MRPS12   | 10        | F: AAGCCCAAGAAGCCCAACT<br>R: ACGACGGTGAGCTTGACG         | 173     | 1.5 | 60 |                                  | BI961235 |
| myeloid-associated differentiation marker                    | MYADM    | 10        | F: ATAGCAGCAAAGGTGATGG<br>R: GGTACAGTAACCCGCACGAC       | 322     | 2.0 | 62 |                                  | BI395226 |
| natural killer cell group 7 sequence                         | NKG7     | 10p13-p12 | F: GTGAGCTTCCTGGTCCTGTC<br>R: GAGAAGAACGTCTGGATCTG      | 259     | 1.5 | 60 | Brinkmeyer-Langford et al. 2005* | BM734829 |
| nitric oxide synthase interacting protein                    | NOSIP    | 10        | F: GGAGGAGCAGAAAGAGTTGC<br>R: CAGCGCTTTGTCTTGTCTT       | 286     | 1.5 | 60 |                                  | CD535503 |
| nuclear receptor subfamily 2, group E, member 1              | NR2E1    | 10        | F: CATCTCCCTAACACTTCTTTCC<br>R: GAAATATCCGTAGCAGAGTGG   | 161     | 1.5 | 58 |                                  |          |
| nudix (nucleoside diphosphate linked moiety X)-type motif 19 | NUDT19   | 10        | F: ACTGACTACCTGATGTTGCCCT<br>R: GTGCTCCATAACACACCTGAAA  | 116     | 1.5 | 59 |                                  | CX599185 |
| nucleoporin 62kDa                                            | NUP62    | 10        | F: TGGAGAAGGTGAAGCTGGAC<br>R: CGAGTTCTGGTCGATCCACT      | 341     | 1.5 | 58 | Brinkmeyer-Langford et al. 2005  | BM089312 |
| microsatellite                                               | NVHEQ007 | 10        | F: TCAGCGACAATCTTCCTCATACA<br>R: ATTCACACCTCCCCCAGAAAT  | 122-126 | 3.0 | 65 | Røed et al. 1997                 | AF011402 |
| microsatellite                                               | NVHEQ018 | 10        | F: GGAGGAGACAGTGGCCCCAGTC<br>R: GCTGAGCTCTCCCATCCCATCG  | 112-142 | 3.0 | 65 | Røed et al. 1997                 | AF011404 |
| microsatellite                                               | NVHEQ067 | 10        | F: GCTCACTCAACTCCCAGAG<br>R: GGATTAGATTACCCAGACAACT     | 187-195 | 2.0 | 58 | Bjornstad et al. 2000            | AJ245764 |

|                                                                                       |                           |           |                                                          |     |     |    |                                         |          |
|---------------------------------------------------------------------------------------|---------------------------|-----------|----------------------------------------------------------|-----|-----|----|-----------------------------------------|----------|
| programmed cell death 5                                                               | PDCD5                     | 10        | F: CAAGGTTTAATAGAAATCCTCGAAA<br>R: CGTCATCTTCATCAGAGTCCA | 426 | 1.5 | 60 |                                         | BX914933 |
| paternally expressed 3                                                                | PEG3                      | 10p12     | F: GCTCACTAAAGGTTGGGCTA<br>R: GATCATGCATACTAGAGAGAACC    | 245 | 1.5 | 58 | Brinkmeyer-<br>Langford et<br>al. 2005* | BU745796 |
| peroxisomal biogenesis<br>factor 7                                                    | PEX7                      | 10q22-q23 | F: CGCTATGCCTGCTTGAGGTAC<br>R: TCAATAGAGTCTACGGAGCTCCAG  | 330 | 1.5 | 60 | Lear et al.<br>2001*                    | G62199   |
| phosphoglucomutase 3                                                                  | PGM3                      | 10        | F: TCCACACCCCAACTCTAACC<br>R: ATGCAATCCTCACAAAAACCC      | 125 | 1.5 | 58 |                                         |          |
| pleckstrin homology<br>domain interacting protein                                     | PHIP                      | 10        | F: GCCCTACTAAGGACAAAATTCC<br>R: GCCAGACAAGACATCACAAAAG   | 147 | 1.5 | 58 |                                         |          |
| protein kinase (cAMP-<br>dependent, catalytic)<br>inhibitor beta                      | PKIB                      | 10q22     | F: AAGCCCAAAGATGAAGGAAAA<br>R: TTGGACATCATGGTTGTAATCC    | 202 | 1.5 | 55 | Perrocheau<br>et al. 2006*              | DX010648 |
| proline-rich nuclear<br>receptor coactivator 1                                        | PNRC1                     | 10        | F: CCAAAATCCCTGGACTCTTGAA<br>R: TGCCTTAGCACACACTTAAAT    | 269 | 1.5 | 58 |                                         |          |
| processing of precursor 4<br>, ribonuclease P/MRP<br>subunit ( <i>S. cerevisiae</i> ) | POP4                      | 10        | F: TACAGTCTTTTCTCCCTCT<br>R: GAAACAATAGCGCCGTGAAG        | 313 | 1.5 | 60 | Brinkmeyer-<br>Langford et<br>al. 2005  | BP172676 |
| popeye domain containing<br>3                                                         | POPDC3                    | 10        | F: TAGCGAAACTCTGATGATGGA<br>R: GCAAGATGATAAATGGCTCCT     | 194 | 1.5 | 58 |                                         |          |
| POU domain, class 2,<br>transcription factor 2                                        | POU2F2                    | 10p14-p13 | F: TCTGGTGGAAGTCTGCCTCT<br>R: GCTTCCTCGCCCTCTTTC         | 398 | 1.5 | 58 | Brinkmeyer-<br>Langford et<br>al. 2005* | BM734940 |
| protein phosphatase 5,<br>catalytic subunit                                           | PPP5C                     | 10p13     | F: AGTACACAGCCCAGATGTAC<br>R: TCCGCTCGATCTTCCTGATG       | 280 | 1.5 | 58 | Brinkmeyer-<br>Langford et<br>al. 2005* | BP161170 |
| PR domain containing 1,<br>with ZNF domain                                            | PRDM1                     | 10        | F: TCTCCCGTGTCATGTAGCTC<br>R: TTCCCCTACCATTTTCCACC       | 135 | 1.5 | 58 |                                         |          |
| prolyl endopeptidase                                                                  | PREP                      | 10q17     | F: GCTTTCCACCGTTAAACC<br>R: AAGGGCTCGCTAAAAAGGAG         | 143 | 1.5 | 58 | Perrocheau<br>et al. 2006*              | BI961439 |
| presenilin enhancer 2<br>homolog ( <i>C. elegans</i> )                                | PSENEN<br>( <i>PEN2</i> ) | 10p14-p13 | F: TTGTCCCGGCATACACGGA<br>R: TACCCAGGGGTATGGTGAA         | 355 | 1.5 | 58 | Brinkmeyer-<br>Langford et<br>al. 2005* | BX921838 |
| RALBP1 associated Eps<br>domain containing 1                                          | REPS1                     | 10        | F: CAAAGGCACAACCCCTCT<br>R: CTGTGATGCAAGAACAGCAG         | 133 | 1.5 | 60 |                                         | CX594615 |
| REV3-like, catalytic                                                                  | REV3L                     | 10q21     | F: CGACAATGTATGAAGCTTCTGG                                | 118 | 1.5 | 55 | Perrocheau                              | DX010569 |

|                                                    |         |           |                                                                |     |     |    |                                                |          |
|----------------------------------------------------|---------|-----------|----------------------------------------------------------------|-----|-----|----|------------------------------------------------|----------|
| subunit of DNA polymerase zeta (yeast)             |         |           | R: TAAGTTCAAGGGATGGCACAC                                       |     |     |    | et al. 2006*                                   |          |
| ring finger protein 146                            | RNF146  | 10        | F: GTAGTGCATTTTCGGGAGTTG<br>R: ACGAGGACTAGACAGCAAAGC           | 508 | 1.5 | 60 |                                                | CX602891 |
| v-ros UR2 sarcoma virus oncogene homolog 1 (avian) | ROS1    | 10        | F: TTCTTCTTCTCCCGACTCCC<br>R: TGAAC TTGCTCATGCTTTCC            | 201 | 1.5 | 58 |                                                |          |
| ribosomal protein L13a                             | RPL13A  | 10        | F: CATGAACACCAACCCATCC<br>R: TGCCATCGAACACCTTGAG               | 343 | 1.5 | 58 |                                                |          |
| ribosomal protein L28                              | RPL28   | 10        | F: CTGATCAAGAGGAACAAGCA<br>R: ATCTCCGCTTCATCACCACC             | 285 | 1.5 | 60 | Brinkmeyer-Langford et al. 2005                | BM780607 |
| ribosomal protein S5                               | RPS5    | 10        | F: TACATCGCGGTGAAGGAGAA<br>R: GCTTCTTGCCATTGTTACGG             | 148 | 1.5 | 58 | Brinkmeyer-Langford et al. 2005                | BI961498 |
| ribosomal protein S17 pseudogene                   | RPS17ps | 10        | F: TGTCACCCACCTGATGAAAC<br>R: TCAGCATCTCCTTAGTGTCAGG           | 190 | 1.5 | 60 |                                                |          |
| ribosomal protein S19                              | RPS19   | 10        | F: CCCAGCCATTTTAGCAGAGG<br>R: TCCCTGAGGTGTCAGTTTGC             | 602 | 1.5 | 63 | Brinkmeyer-Langford et al. 2005                |          |
| SEC63 homolog (S. cerevisiae)                      | SEC63   | 10        | F: AACCAGAAACAGTGCAGAACC<br>R: AATGCACCATCCCATTTCTTG           | 153 | 1.5 | 58 |                                                | CD471880 |
| microsatellite                                     | SGCV17  | 10q17-q21 | F: GGCCCAACGTCTATAGAAAGATGT<br>R: CCCCCAAATGGCTATTTTCTAA       | 138 | 3.0 | 65 | Godard et al. 1997*                            | U90595   |
| microsatellite                                     | SGCV20  | 10p14-p13 | F: GGAAAAATTTGCTTATATATGCATAC<br>R: GGAAAAAGAACGTTTCACCTTAGCTG | 168 | 3.0 | 65 | Godard et al. 1997*                            | U90598   |
| microsatellite                                     | SGCV30  | 10p13prox | F: ACTGGAGGGGTGAAACAGATTGAGA<br>R: GGAAGGGAGGTCATCAGAA         | 160 | 3.0 | 58 | Godard et al. 1997*                            | U90605   |
| serum/glucocorticoid regulated kinase              | SGK     | 10        | F: AACCTGTGTGAGAGTGAAAAAC<br>R: GGAGAAAGCGACTTGGA CTG          | 153 | 1.5 | 58 |                                                |          |
| solute carrier family 7, member 9                  | SLC7A9  | 10        | F: TAACAAAGATGCCACTCCCC<br>R: CATCGTACCAAGCTCTGCAA             | 346 | 2.0 | 58 |                                                | AF425262 |
| solute carrier family 7, member 10                 | SLC7A10 | 10p15     | F: GGTCTTCAGCTTCATCTCGG<br>R: ACATTGTAGGGAGGCATTCC             | 274 | 2.0 | 58 | Hanzawa et al. 2002*;<br>Chowdhary et al. 2003 | AF425263 |
| sphingomyelin                                      | SMPDL3A | 10        | F: GACCCTACTTACCACATCACAGA                                     | 107 | 1.5 | 59 |                                                |          |

|                                        |        |           |                                                     |         |     |    |                         |          |
|----------------------------------------|--------|-----------|-----------------------------------------------------|---------|-----|----|-------------------------|----------|
| phosphodiesterase, acid-like 3A        |        |           | R: GGGGAATCACACAGAACATCT                            |         |     |    |                         |          |
| striatin, calmodulin binding protein 4 | STRN4  | 10        | F: GCTAGGATGACTGACC<br>R: CGACCTGCCTCTGTACCTTC      | 700     | 2.0 | 55 |                         | BI395151 |
| transforming growth factor, beta 1     | TGFB1  | 10p14-p13 | F: ACTGCTCCTGTGACAGCAAA<br>R: ATCAATGGTGGCCAGATCAC  | 228     | 1.5 | 58 | Perrocheau et al. 2005* |          |
| microsatellite                         | TKY023 | 10        | F: GCACACGAATCTTAGGGTCG<br>R: CAGAAGCTGGACGATGGTTC  | 169     | 2.0 | 58 | Hirota et al. 2001      | AB048333 |
| microsatellite                         | TKY365 | 10        | F: TCAAGACCTTTTACGACCTG<br>R: CCTACGATAGACAGAGGAAAG | 155-171 | 1.5 | 58 | Tozaki et al. 2001      |          |
| microsatellite                         | TKY460 | 10        | F: CAACTAGAAGGACCCACAAG<br>R: AGACTTCTCCATCAGGCAC   | 188     | 2.0 | 58 |                         | AB103678 |
| microsatellite                         | TKY471 | 10        | F: AAATCTGCGCCTCTGAAGAT<br>R: TTCACCCAACCCCTCATAAA  | 215-227 | 1.5 | 55 | Tozaki et al. 2004      | AB103689 |
| microsatellite                         | TKY496 | 10        | F: ATCATTCTGCGGCTAAAGG<br>R: GATCAACCAGGGAGGAGGAG   | 220-240 | 1.5 | 60 | Tozaki et al. 2004      | AB103714 |
| microsatellite                         | TKY503 | 10        | F: CCCATCTCAACCCAGGTAAA<br>R: TGTGAACATGGCTCTAGTGGA | 116-128 | 1.5 | 55 | Tozaki et al. 2004      | AB103721 |
| microsatellite                         | TKY537 | 10        | F: TCAGGGGTTCTCTTCAGTG<br>R: TTGCCTGGTGTCTAGGTTCC   | 162-172 | 1.5 | 50 | Tozaki et al. 2004      | AB103755 |
| microsatellite                         | TKY580 | 10        | F: AGAAATGGAGGGAAGGGAAA<br>R: GCAGTGGCTGTGTGGAATAA  | 192-196 | 2.5 | 57 | Tozaki et al. 2004      |          |
| microsatellite                         | TKY592 | 10        | F: TGCAGTGGGTACGTGTGTAA<br>R: GGGCAGACTTCCAAACAGTC  | 149-163 | 1.5 | 58 | Tozaki et al. 2004      |          |
| microsatellite                         | TKY601 | 10        | F: CGAGGGGGAATTTTGTGTTGT<br>R: ATAGAGCCATGCAGGGGAAA | 205-219 | 1.5 | 60 | Tozaki et al. 2004      |          |
| microsatellite                         | TKY614 | 10        | F: CCGTGAGGAGTTTTAGACAG<br>R: ATGTTAGCTTAGGGCCAATC  | 104     | 2.0 | 58 |                         | AB103832 |
| microsatellite                         | TKY632 | 10        | F: CGACGGATGAATGGATAAAG<br>R: ATGTTGTTGCAAATGGCAAG  | 164     | 2.0 | 58 |                         | AB103850 |
| microsatellite                         | TKY689 | 10        | F: ATACCACAGCACAGCACACC<br>R: TTTCTGGTACCCCACTTA    | 232-238 | 1.5 | 58 | Tozaki et al. 2004      |          |
| microsatellite                         | TKY722 | 10        | F: CATTTGCAACATGCCTCTTT<br>R: CATTACGCAGCAGATAAAGGA | 104-122 | 2.0 | 54 | Tozaki et al. 2004      |          |
| microsatellite                         | TKY751 | 10        | F: ATGTGTGTGAGCGTGTGTG<br>R: AGGCACCAGAATTTTGGAA    | 156-167 | 1.5 | 58 | Tozaki et al. 2004      |          |
| microsatellite                         | TKY773 | 10        | F: GAGAACGGCCTTAACCGT                               | 245     | 2.0 | 58 |                         | AB103991 |

|                                  |          |                       |                                                      |         |     |    |                                                                  |          |
|----------------------------------|----------|-----------------------|------------------------------------------------------|---------|-----|----|------------------------------------------------------------------|----------|
| microsatellite                   | TKY838   | 10                    | R: CCTTGCAACCAAAGCCGTTTC<br>F: AGAAACAGAACCACTAGGAG  | 148     | 2.0 | 58 |                                                                  | AB104056 |
| microsatellite                   | TKY855   | 10                    | R: TCTATTATCAGGTGCCAAGG<br>F: GATCTTGGCAGAAATGCCTG   | 142     | 2.0 | 58 |                                                                  | AB104073 |
| microsatellite                   | TKY867   | 10                    | R: TCAAGCAAATAGGAGCTGAG<br>F: AGCTAATGTCAGTAGGTTGG   | 215     | 2.0 | 58 | Tozaki et al.<br>2004                                            | AB104085 |
| microsatellite                   | TKY918   | 10                    | R: TTCCAAGCATCTTAAGGAGG<br>F: TGATGCCCAGGGAACAACT    | 274     | 2.0 | 58 |                                                                  | AB104136 |
| microsatellite                   | TKY964   | 10                    | R: TGTTGTAGTACTTGTCCAGG<br>F: CCCAATCTCCTGCTTAAGT    | 191     | 2.0 | 58 |                                                                  | AB104182 |
| microsatellite                   | TKY999   | 10                    | R: AATTGATGACTAGGGCTCAC<br>F: TGAGAGTATCAGGCAAGAAG   | 132     | 2.0 | 58 |                                                                  | AB104217 |
| microsatellite                   | TKY1034  | 10                    | R: AACTTTGGCAGGTAGAGTAG<br>F: GACCTGTTAGTGTAAGTTCTG  | 158     | 2.0 | 58 |                                                                  | AB104252 |
| microsatellite                   | TKY1050  | 10                    | R: ACACCTGATGCAATGCTTTC<br>F: GCATTATCACATGAGCTAGC   | 137     | 2.0 | 58 |                                                                  | AB104268 |
| microsatellite                   | TKY1101  | 10                    | R: AGGAGAGAGGAACCCAAG<br>F: TCTGGCCTTTTCCCATTATC     | 183     | 2.0 | 58 |                                                                  | AB104319 |
| microsatellite                   | TKY1765  | 10                    | R: ACAGAATGTACGGTTCATG<br>F: AAACATTCTCACTCCAATCC    | 219     | 1.5 | 58 | Tozaki et al.<br>2007                                            | AB215708 |
| microsatellite                   | TKY1995  | 10                    | R: TTGGGTGACTCATCTTGAAT<br>F: CCAACCACTGGCTTTTAAAG   | 157     | 1.5 | 60 | Tozaki et al.<br>2007                                            | AB215938 |
| microsatellite                   | TKY2470  | 10                    | R: ATGTCTGGCAAAAAGCTACAG<br>F: AAAATGCATCCATTCTTCA   | 144     | 1.5 | 56 | Tozaki et al.<br>2007                                            | AB216413 |
| microsatellite                   | TKY2521  | 10                    | R: TCACCCTATTTGTTGGGAAA<br>F: TTATGAAGCCAGAGGCAAC    | 290     | 1.5 | 58 | Tozaki et al.<br>2007                                            | AB216464 |
| microsatellite                   | TKY2859  | 10                    | R: GAGCTGCTGTCTAACCAGAAA<br>F: ATGGTGCCGCCTAAAAGTAT  | 164     | 1.5 | 58 | Tozaki et al.<br>2007                                            | AB216802 |
| teashirt family zinc finger<br>3 | TSHZ3    | 10                    | R: GATATTGAAGATGCTCACATGG<br>F: CAACGACCAAGCCATAGACT | 245     | 1.5 | 58 |                                                                  | AW417891 |
| microsatellite                   | UCDEQ412 | 10p13prox-<br>p12dist | R: TGGAAGGGGTGGAGGACTT<br>F: AGAGGAAGGCGACAGGTC      | 188-208 | 3.0 | 58 | Eggleston-<br>Stott et al.<br>1997;<br>Chowdhary<br>et al. 2003* | AF000011 |
| microsatellite                   | UCDEQ482 | 10p14-p13             | R: CATCCGTCCATCCATCAG<br>F: CACAGCCCTGACCACTGA       | 115-125 | 1.5 | 58 |                                                                  | U67416   |

|                                            |         |                   |                                                       |         |     |    |                                            |          |
|--------------------------------------------|---------|-------------------|-------------------------------------------------------|---------|-----|----|--------------------------------------------|----------|
|                                            |         |                   | R: CCAAAACAGCCCTGGACT                                 |         |     |    | Stott et al. 1999                          |          |
| microsatellite                             | UM028   | 10p13prox-p12dist | F: GCTCTGCCTCATTCCTTATC<br>R: TTGAGGACGGAGTGTTG       | 127-129 | 1.5 | 58 | George et al. 1998; Chowdhary et al. 2003* | AF195575 |
| microsatellite                             | UM040   | 10q21-q23         | F: CTCTTGTAACATGTCTCCTTGTC<br>R: TACTTTCTCTCTTCCAAACC | 250-270 | 3.0 | 50 | George et al. 1998; Chowdhary et al. 2003* | AF195584 |
| microsatellite                             | UMNe209 | 10                | F: CCAAAGGTTTCGTAGTTTCCC<br>R: TAATTGGCCAGGAAATGCTC   | 200     | 2.0 | 58 | Mickelson et al. 2003                      | AF536291 |
| microsatellite                             | UMNe265 | 10                | F: GATCTGACACCACCACCCTC<br>R: ACCATAAAAAATCATCACCTCG  | 180     | 2.0 | 58 | Mickelson et al. 2003                      | AF536323 |
| microsatellite                             | UMNe267 | 10                | F: AGCCTCCATATGCTTTGTCTG<br>R: GGAATTGACTCAGTCCTGAAGG | 150     | 2.0 | 58 | Mickelson et al. 2003                      |          |
| microsatellite                             | UMNe372 | 10                | F: ACGTTACAGGTGGGGAGATG<br>R: CTTGGCTTCCAGGAAAACAC    | 127     | 2.0 | 58 | Wagner et al. 2004a                        |          |
| microsatellite                             | UMNe426 | 10                | F: TGGCTTTTCATCTGAACTGTTC<br>R: TGGCCTGGGAGGTTATTTTG  | 139     | 1.5 | 50 | Mickelson et al. 2004                      | AY731393 |
| microsatellite                             | UMNe506 | 10                | F: AGGGACGTGACCTAACATGG<br>R: CAGCACAGCCTCCTCTCC      | 142     | 1.5 | 60 | Wagner et al. 2004c                        | AY735257 |
| microsatellite                             | UMNe543 | 10                | F: GGCAGGATTTCTCTCTTTCC<br>R: TCTGCACTCCTGTGTTCACTG   | 190     | 1.5 | 62 | Wagner et al. 2004c                        | AY735264 |
| WNT1 inducible signaling pathway protein 3 | WISP3   | 10                | F: GGAAGCAGTTTTGTGTCATTGG<br>R: GTCACAGTACAGCCCTTTGTG | 173     | 1.5 | 58 |                                            | CX598720 |
| zinc finger protein 536                    | ZNF536  | 10                | F: CTTGTGTCCGATTGTCCTGT<br>R: CACATTTTGCTTCAATCACC    | 209     | 1.5 | 55 | Brinkmeyer-Langford et al. 2005            | AV593008 |
| zinc finger protein 543                    | ZNF543  | 10                | F: TTCACCCACCGCTCCAATTT<br>R: CTTCTCCCCAGTGTGAATCC    | 390     | 1.5 | 60 | Brinkmeyer-Langford et al. 2005            | BP437102 |



| Name                                              | Symbol        | Horse chr. | Primers                                                   | Product size (bp) | MgCl <sub>2</sub> (mM) | T <sub>a</sub> | Reference                                     | Accession No |
|---------------------------------------------------|---------------|------------|-----------------------------------------------------------|-------------------|------------------------|----------------|-----------------------------------------------|--------------|
| sequence tagged site                              | 11STS01       | 11         | F: TCTTCCACGAATACTAGTGTCTG<br>R: CAAGGACCCTCAACACCATC     | 101               | 1.5                    | 58             |                                               |              |
| sequence tagged site                              | 11STS02       | 11         | F: TGCCTGTTGGATTCTGTTTTTC<br>R: TCTGATTCTGGACCTTTCCG      | 233               | 3.0                    | 58             |                                               | BI395131     |
| alanyl-tRNA synthetase domain containing 1        | AARSD1        | 11         | F: GCTTCTCCAGGACTATGTCAGC<br>R: ATTCTGTGGTCACAGGAGGC      | 102               | 1.5                    | 59             |                                               | CX594725     |
| acetyl-Coenzyme A carboxylase alpha               | ACACA         | 11q12      | F: TCCTGACTTGTCAGAGACCC<br>R: CTAATCCCCACTTAGTGCCC        | 633               | 1.5                    | 60             |                                               | AJ543302     |
| angiotensin I converting enzyme 1                 | ACE<br>(ACE5) | 11p13      | F: GCCCAGGAGGATGTTTAAGGA<br>R: CTTGCCGTTGTAGAAGTCCCA      | 140               | 3.0                    | 60             | Milenkovic et al. 2002*                       | AF264016     |
| acyl-Coenzyme A oxidase 1                         | ACOX1         | 11         | F: GACAAGTAACGCTGCTATCG<br>R: ATGCCACACACCAACTTTCC        | ~1070             | 1.5                    | 60             |                                               | CD535625     |
| microsatellite                                    | AHT016        | 11         | F: ATGTTGTGCAAATGGGATGA<br>R: TGCCCATTGATTGATGATTG        | 123-146           | 2.0                    | 58             | Swinburne et al. 1997                         |              |
| microsatellite                                    | AHT044        | 11p14-p13  | F: CCTCCACATGAGGTGCATTT<br>R: GACAATGAGAGAGGCCAACC        | 160               | 2.0                    | 58             | Swinburne et al. 2000; Chowdhary et al. 2002* | AJ271529     |
| microsatellite                                    | AHT076        | 11         | F: ACTGAGCGGCCATGACTC<br>R: GAGGATTGGTGGCAGATGTT          | 162-168           | 1.5                    | 60             | Swinburne et al. 2003                         | AJ507693     |
| microsatellite                                    | AHT125        | 11         | F: TCCCCTCTTCAGACCTCTCA<br>R: CAAGCAAAAAGAGGAAGATTGG      | 247               | 2.0                    | 60             |                                               |              |
| microsatellite                                    | AHT128        | 11         | F: ACATGGCACATTTCGTGGAC<br>R: TCTGGGTACGCTAGCGATG         | 306-320           | 1.5                    | 58             | Penedo et al. 2005                            |              |
| adaptor-related protein complex 2, beta 1 subunit | AP2B1         | 11         | F: CCGGTCATCTTTAGGGTTGTA<br>R: GCAGCGTTATCTGAAATCAGC      | 162               | 2.0                    | 58             |                                               |              |
| microsatellite                                    | ASB35         | 11         | F: ATGCATGAGCAGAGTGTTCTTCC<br>R: TAGTACTTCTCTCTTAATATAAGC | 170               | 4.0                    | 58             | Lindgren et al. 1998                          |              |

|                                                    |                  |                  |                                                        |      |     |    |          |
|----------------------------------------------------|------------------|------------------|--------------------------------------------------------|------|-----|----|----------|
| XIAP associated factor-1                           | BIRC4BP          | 11               | F: ATGTCGCACAGTCTCAG<br>R: CATCTTTCTCTGCCGTGGA         | 116  | 1.5 | 55 |          |
| breast cancer 1                                    | BRCA1            | 11               | F: CTATGCGCAGCAATTGAAAA<br>R: GCAAATGACTGACGCTTTGA     | 212  | 2.0 | 58 | AF284010 |
| carbonic anhydrase IV                              | CA4              | 11               | F: ACGGGATAGGGTGGGAGAG<br>R: CAGAGTGGGTTGAAGCAGG       | 138  | 1.5 | 60 |          |
| calcium channel, voltage-dependent, beta 1 subunit | CACNB1           | 11               | F: AGTCAGAGACTGGGTTCAAG<br>R: ACATGGGCAAACTATAAGAGG    | 131  | 1.5 | 56 |          |
| chemokine (C-C motif) ligand 2                     | CCL2             | 11               | F: CTTCTAGCATTCCCTAAATGCC<br>R: TTTCCACAATAGCGTTTTTAGC | 303  | 1.5 | 60 | AJ251189 |
| CD300c molecule                                    | CD300C           | 11               | F: TGAAGTTTGCGGGGTGGT<br>R: ATCTGTGCTGGAGAGATGACCCA    | ~800 | 2.0 | 55 | BI395096 |
| cerebellar degeneration-related protein 2-like     | CDR2L            | 11               | F: GTTACAGGTTCCAGGGGTCT<br>R: CCTGCTCTGATTGGCTACAG     | ~250 | 1.5 | 59 | CX596675 |
| BAC end sequence                                   | CH241-100B11_SP6 | 11               | F: GCAATGGGTAAGGCAGTTAAG<br>R: GTGAGTGGCACATAAGAAGG    | 471  | 1.5 | 60 | AJ542709 |
| BAC end sequence                                   | CH241-101A18_SP6 | 11               | F: CTCAGATTGTAGGAAAGACCAC<br>R: GGCAGAGGTTAAGTAGGCAG   | 216  | 1.5 | 60 | AJ576445 |
| BAC end sequence                                   | CH241-101K01_T7  | 11               | F: ATGTAATGCCCCGTCCCAGTC<br>R: GCCTAATGTGCTTGTCTGGAG   | 567  | 1.5 | 60 | AJ576859 |
| BAC end sequence                                   | CH241-102B10_SP6 | 11               | F: CATTTTCTTATTTGCTGCCTCC<br>R: CATTTCTCCCTTAACCCCTTTC | 571  | 1.5 | 60 | AJ583985 |
| BAC end sequence                                   | CH241-102M09_SP6 | 11               | F: GCAAGTCTGTCTCAGTTTTCTC<br>R: TTGTCCATACACCCAGTCCC   | 288  | 1.5 | 60 | AJ584478 |
| BAC end sequence                                   | CH241-103P20_T7  | 11               | F: GCAGACAACAGCAGGTAAAG<br>R: GGAGCCACTGGAAAATGAAC     | 245  | 1.5 | 60 | AJ618911 |
| cholinergic receptor, nicotinic, epsilon           | CHRNE            | 11               | F: GCTTGAACCTACCCCTTTCCTG<br>R: CCGTCAGATGAGGGCAATTC   | 125  | 1.5 | 56 |          |
| collagen, type I, alpha 1                          | COL1A1           | <b>11q11-q12</b> | F: TGTCCAGCAATGCCCTGA<br>R: GCAAAGAAGGCGGCAAG          | 268  | 2.0 | 60 |          |
| colony stimulating factor 3                        | CSF3             | 11               | F: TATTTAAACAGCAGTGTTCCCC<br>R: TATCGTGAAGTTGGCTACAATG | 504  | 1.5 | 58 | AF503365 |
| chemokine (C-X-C)                                  | CXCL16           | 11               | F: CATCCATGCCAATGAAACC                                 | 131  | 1.5 | 58 |          |

|                                              |                      |                    |                                                        |         |     |       |                                                 |          |
|----------------------------------------------|----------------------|--------------------|--------------------------------------------------------|---------|-----|-------|-------------------------------------------------|----------|
| motif) ligand 16                             |                      |                    | R: CTGCCACTGTAACTGATGTCC                               |         |     |       |                                                 |          |
| microsatellite                               | D-8                  | 11p13-p12          | F: TTTTGTGTCTCAGGAGTGTG<br>R: AGTCTGATGGTGGAGGAAGG     | 95-105  | 3.0 | TD 64 | Marti et al. 1998*                              | Y10241   |
| DEAD box polypeptide 5                       | DDX5 ( <i>HLR1</i> ) | 11p13              | F: GAACTCTGCAAAAGAGGGC<br>R: AGAGCATTTCAAATGGAGAGTC    | 99      | 1.5 | 56    | Lear et al. 2001*                               |          |
| elaC homolog 2 (E. coli)                     | ELAC2                | <b>11q14.3-q15</b> | F: CCGAAGTTGAACGCTTGA<br>R: CCGAATAGACCACCTTCCA        | 217     | 2.0 | 58    |                                                 |          |
| enolase 3                                    | ENO3                 | <b>11q14.3-q15</b> | F: GGTCCTGAAAGCTGTGGAAC<br>R: GTCCCATCCAGCTCAATCAT     | 279     | 1.5 | 55    |                                                 |          |
| eosinophil peroxidase                        | EPX                  | 11                 | F: CCCCAGGACAGTGAACAAG<br>R: CCACAAGCCACCATTCTGAC      | 120     | 1.5 | 56    |                                                 |          |
| ecotropic viral integration site 2A          | EVI2A                | <b>11q12-q13</b>   | F: AACAACAACAAAATCGCTATGC<br>R: CGCTTGCCTACTTGTGTTTGA  | 140     | 3.0 | TD 60 | Chowdhary et al. 2002                           | AF130762 |
| fatty acid synthase                          | FASN                 | 11p14              | F: CACCGGGTGAAGGCTGGCACT<br>R: GGTTTAATCGTGGGGAGGCTCC  | 296     | 1.5 | 55    | Lear et al. 2001*                               | G62204   |
| galanin receptor 2                           | GALR2                | 11                 | F: ATCGTGCCCATGTTATTTGC<br>R: GGTGAGGAAGATGAAGAAGTG    | 246     | 1.5 | 58    |                                                 | CD467026 |
| gastrin                                      | GAST ( <i>GAS</i> )  | 11q12              | F: ATGTGCTGATCTTTGCGCTG<br>R: AGGACTTTGATCCCCCTTCCTC   | 302     | 1.5 | 60    | Milenkovic et al. 2002*                         | Y09440   |
| gem (nuclear organelle) associated protein 4 | GEMIN4               | 11q14.1            | F: AGTCTGACTGGGAGCACGTT<br>R: GTTGCCACAGAGAAGAACAC     | 200     | 1.5 | 55    | Perrocheau et al. 2005*                         | AY817471 |
| growth hormone 1                             | GH1 ( <i>GH</i> )    | 11                 | F: TCAGGATGTGGGCGCCTTC<br>R: TGGGCGTTCCTGGATCGAGTATCT  | 372     | 4.0 | 58    | Caetano et al. 1999                             | AF097589 |
| guanylate cyclase 2D, membrane               | GUCY2D               | 11q15-q16          | F: ATGAGCACTGTGCGGATTCT<br>R: AGGGGGACGGAGGACTTAG      | 201     | 2.0 | 58    | Shubitowski et al. 2001; Chowdhary et al. 2003* | AY008791 |
| hepatic leukemia factor                      | HLF                  | 11                 | F: TTGGAATACATGGACCTGGAG<br>R: GGCTCTGCACACAGTTTGG     | 193     | 1.5 | 55    | Perrocheau et al. 2006                          | DX010505 |
| microsatellite                               | HLM2                 | 11q14-q15          | F: CCCACCTCCCCATCTCCCAACC<br>R: AAGCCAGTTCCTCAGCCCCACC | 123-137 | 1.5 | 58    | Vega-Pla et al. 1996; Chowdhary et al. 2002*    | U36494   |
| microsatellite                               | HTG26                | 11                 | F: CCTGGAAACCATCATTCTACT                               | 141     | 2.0 | 58    | Lindgren                                        |          |

|                                                             |                           |                         |                                                                                  |         |     |    |                                                           |          |
|-------------------------------------------------------------|---------------------------|-------------------------|----------------------------------------------------------------------------------|---------|-----|----|-----------------------------------------------------------|----------|
| integrin, alpha 2b                                          | ITGA2B                    | 11                      | R: CTCCAGGCTGAGTTATTTGTA<br>F: CACTCCCTAGCTGTGTGTTTC<br>R : AAAGTCACTGCCCAAATGCC | 154     | 1.5 | 56 | 2000                                                      |          |
| microsatellite                                              | LEX068                    | 11p13<br>prox           | F: AAATCCCCGAGCTAAAATGTA<br>R: TAGGAAGATAGGATCACAAGG                             | 154-168 | 3.0 | 58 | Coogle &<br>Bailey,<br>1999;<br>Chowdhary<br>et al. 2002* |          |
| lectin, galactoside-<br>binding, soluble, 9                 | LGALS9                    | 11                      | F: GGTGGCCTGTACCCCTCCAA<br>R: CGGACCACGGTGTTCATCAA                               | 390     | 1.5 | 60 |                                                           | CD528716 |
| ligase III, DNA,<br>ATP-dependent                           | LIG3                      | 11                      | F: CTTTCTTTGAGAGGCTCCAC<br>R: AGGAAATTCTGAGGTTCCCTG                              | 268     | 1.5 | 58 |                                                           |          |
| Meckel syndrome,<br>type 1                                  | MKS1                      | 11                      | F: TGCCCACCCTACTTAGCTTG<br>R: CATGTCAGATTGCATCAGCTC                              | 420     | 1.5 | 60 |                                                           | U97315   |
| MAX-like protein<br>X                                       | MLX                       | 11                      | F: ATAGGAAGCTCCAGCCATCCAC<br>R: TCCCCCAGCTAGGAAGAAGAAC                           | 145     | 1.5 | 60 |                                                           |          |
| monocyte to<br>macrophage<br>differentiation-<br>associated | MMD<br>( <i>HESTG03</i> ) | 11                      | F: GTGGTCTGGTTGGTGTATCAC<br>R: GTACTGATACTGCTTTAAAAAGTGG                         | ~200    | 1.5 | 52 | Godard et al.<br>2000*                                    | X85750   |
| myosin, heavy<br>chain 3, skeletal<br>muscle, embryonic     | MYH3                      | 11                      | F: TCAGCCCAGATTGAGATGAAC<br>R: TCCTTCTCCAGTTTCTGCTTG                             | 188     | 1.5 | 55 | Perrocheau<br>et al. 2006                                 | DX010531 |
| myosin, heavy<br>chain 4                                    | MYH4                      | <b>11q14.3<br/>-q15</b> | F: GTCCATGAAAGGCCATGAAC<br>R: TAGCCTCACTGCCCTCTTAG                               | 211     | 1.5 | 58 |                                                           |          |
| myosin, light chain<br>4                                    | MYL4                      | 11p13-<br>p12.3         | F: TGTTTTCGACAAGGAGAGCA<br>R: AGACAGGGTGGATCAGGATG                               | 196     | 1.5 | 58 | Caetano et<br>al. 1999;<br>Chowdhary<br>et al. 2002*      | AF130773 |
| neurofibromin 1                                             | NF1                       | 11q12-<br>q13           | F: ACAGTGGCCTCATGCACTC<br>R: CTGTGCCTTGTTGGAGGATT                                | 221     | 1.5 | 58 | Caetano et<br>al. 1999,<br>Mariat et al.<br>2001*         | AF130776 |
| nucleolar protein<br>11                                     | NOL11                     | 11                      | F: ACCAGTTCTCCTTCATGGATGT<br>R: TCACGTTTCTCTCGCTACTGAC                           | 114     | 1.5 | 59 |                                                           | CX605913 |
| N-ethylmaleimide-<br>sensitive factor                       | NSF                       | 11                      | F: CGTTAGAACAGATCAAGAACGA<br>R : TGCATCATGTTTACCACCT                             | 96      | 1.5 | 56 |                                                           |          |

|                                                                     |              |              |                                                            |         |     |       |                        |          |
|---------------------------------------------------------------------|--------------|--------------|------------------------------------------------------------|---------|-----|-------|------------------------|----------|
| microsatellite                                                      | NVHEQ040     | 11           | F: TGGCATCTGAATGGAGAATG<br>R: GATTATGATGCTACAGGGGAAAG      | 144-158 | 3.0 | 58    | Røed et al. 1998       | AF056395 |
| microsatellite                                                      | NVHEQ090     | <b>11q14</b> | F: TCTATGTGTGTCAGAATGAGGAGGT<br>R: TTTTGCAAGGTAGATAGATGCC  | 99-105  | 2.0 | 58    | Røed et al. 1998       | AF056397 |
| oligodendrocyte myelin glycoprotein                                 | OMG          | 11q14        | F: AGTGTTGTAACTCCTTCCCGCG<br>R: ACATACACAGGGAGGAAACTGGG    | 273     | 1.5 | 60    | Lear et al. 2001*      | G62156   |
| procollagen-proline, 2-oxoglutarate 4-dioxygenase, beta polypeptide | P4HB         | 11           | F: GACGAGCTGACAGCAGAGAA<br>R: AGGACAGCCATCTTCACACC         | 219     | 1.5 | 58    | Chowdhary et al. 2002  | AF130777 |
| phosphodiesterase 6G, cGMP-specific, rod, gamma                     | PDE6G        | 11           | F: CGAGCCTGTCCTTTGTTTTTC<br>R: CCCAGGAAGAGTGGCTACAG        | 195     | 2.0 | 58    | Chowdhary et al. 2003  | AY008801 |
| phenylethanolamine N-methyltransferase                              | PNMT         | <b>11p12</b> | F: GTGTGTACAGCCAGCACGTC<br>R: AGTGTGGTGATGTGGTCCAG         | 355     | 1.5 | 58    |                        | AB071422 |
| proteasome 26S subunit, ATPase, 5                                   | PSMC5        | 11           | F: GGAGTTGGGACAGACAACAG<br>R: TGTGCTAGATGCTAGGGATAC        | 152     | 1.5 | 60    |                        |          |
| recoverin                                                           | RCVRN (RCVI) | 11q14.3-q15  | F: GGCAGAGTTCCAGAGCATCTA<br>R: CCACGTCGTAGAGGGAGAAG        | 197     | 2.0 | 58    | Chowdhary et al. 2003* | AY008807 |
| sodium channel, voltage-gated, type IV, alpha subunit               | SCN4A (HYPP) | 11           | F: GGTCTTCATCATCGTCTTCACG<br>R: CACAATGGACAGGATGACAACC     | 118     | 4.0 | 58    | Caetano et al. 1999    |          |
| sarcoglycan, alpha                                                  | SGCA         | <b>11q13</b> | F: AGGAAGTGTTGCCCTCGTC<br>R : AGGAGAAGGGTGAGGCAGAG         | 540     | 1.5 | 66    |                        |          |
| microsatellite                                                      | SGCV13       | 11q12        | F: GGACTAAAGCCCAACCATCCAGC<br>R : CTCACCAGTAAGGGGTTATGGGGC | 162     | 2.0 | 58    | Godard et al. 1997*    | U90592   |
| microsatellite                                                      | SGCV22       | 11p14        | F: GGAAATCACTGCCCCAGCCTG<br>R: GGTGGTTGGGAAAGGGTTGAGGC     | 112     | 2.0 | 58    | Godard et al. 1997*    | U90600   |
| microsatellite                                                      | SGCV24       | 11p12        | F: CTACCATTGAAGAGGGGTGGC<br>R: GAAACGAGCAGGAAGTGAATCTCC    | 121     | 4.0 | TD 64 | Godard et al. 1997*    | U90602   |

|                                                                |                     |       |                                                          |         |     |          |                       |          |
|----------------------------------------------------------------|---------------------|-------|----------------------------------------------------------|---------|-----|----------|-----------------------|----------|
| skeletal muscle and kidney enriched inositol phosphatase       | SKIP                | 11    | F: GGCTTCATCCAGTAGATCC<br>R: GTGATATGCCTGAGACTGAG        | 332     | 3.0 | 58       | Chowdhary et al. 2003 |          |
| SR Y (sex determining region Y)-box 9                          | SOX9                | 11p14 | F: CAGCGAACGCACATCAAGA<br>R: TGGGGGTCGTTGTAGTCGTA        | 161     | 1.5 | 60       |                       |          |
| thyroid hormone receptor associated protein 1                  | THRAP1<br>(TRAP240) | 11q13 | F: CCAGGGGTGTAAGCATGAACTT<br>R: TATTTTCACCTTTGGAGCAGC    | 200     | 1.5 | 58       | Chowdhary et al. 2003 |          |
| translocase of inner mitochondrial membrane 22 homolog (yeast) | TIMM22<br>(TIM22)   | 11    | F: CCGGTGAGAGTAATTGCCTCTG<br>R: CAGGACTGAAGTTTTGTGGAGCTT | 350     | 2.0 | 58       | Chowdhary et al. 2003 |          |
| microsatellite                                                 | TKY010              | 11p12 | F: GATCTTGGACTCGCTCACC<br>R: GATCTAATAGGATGTGTG          | 180     | 2.0 | 55       | Hirota et al. 2001*   | AB048321 |
| microsatellite                                                 | TKY032              | 11q12 | F: GTTCTGCCTTTTGGCTTAAT<br>R: TAGTAATGGGATAATAGGGC       | 125     | 2.0 | 58       | Hirota et al. 2001*   | AB048338 |
| microsatellite                                                 | TKY033              | 11q12 | F: TAGATTAGGTGCCTGGCACG<br>R: CCTCTCCCCCAACTCCAGAG       | 86      | 2.0 | 58       | Hirota et al. 2001*   | AB048339 |
| microsatellite                                                 | TKY276              | 11    | F: TTAGCACTTTATCTCCCTGC<br>R: TGTGTCTGCAATTTACTCTG       | 87-101  | 2.0 | TD<br>60 | Tozaki et al. 2000b   | AB033927 |
| microsatellite                                                 | TKY304              | 11    | F: CTGGTGGCATCTTCTATTAC<br>R: ATATATTCTGCAGGCACAAG       | 128-136 | 1.5 | 58       | Tozaki et al. 2000c   | AB034613 |
| microsatellite                                                 | TKY343              | 11    | F: TAGTCCCTATTTCTCCTGAG<br>R: AAACCCACAGATACTCTAGA       | 166-188 | 1.5 | 58       | Tozaki et al. 2001    | AB044844 |
| microsatellite                                                 | TKY424              | 11    | F: ATACAGGAGTGCGCTTTTCC<br>R: AAACCATCCTCCACCTTTCC       | 158-174 | 1.5 | 58       | Tozaki et al. 2004    | AB103642 |
| microsatellite                                                 | TKY490              | 11    | F: CAGCAGCATCAAACCTAGCA<br>R: TGTGAGTGACTTGGGGGAAG       | 177     | 1.5 | 58       | Tozaki et al. 2004    | AB103708 |
| microsatellite                                                 | TKY551              | 11    | F: GGAACAGATCCTCCCTCAGA<br>R: GAGGCCTTGCATGTGGAC         | 265-269 | 1.5 | 55       | Tozaki et al. 2004    | AB103769 |
| microsatellite                                                 | TKY626              | 11    | F: CCAGCTGAGCCCATTTTAGA<br>R: GGGAGGAGCTGAGAAGATTTG      | 237-239 | 1.5 | 58       | Tozaki et al. 2004    | AB103844 |
| microsatellite                                                 | TKY630              | 11    | F: ATGGCAGGACTCAGCCTCT<br>R: AGCCTTCCTCCACAAGACTG        | 165-180 | 1.5 | 60       | Tozaki et al. 2004    | AB103848 |

|                |         |    |                                                          |         |     |    |                    |          |
|----------------|---------|----|----------------------------------------------------------|---------|-----|----|--------------------|----------|
| microsatellite | TKY646  | 11 | F: CACCGGTAGAGCCTCTGAAT<br>R: GCACAGTGACCATCTGGAAG       | 198-224 | 1.5 | 58 | Tozaki et al. 2004 | AB103864 |
| microsatellite | TKY648  | 11 | F: ACCCATCCATGCTGAAAAGA<br>R: CGAAAGGTATTTGGTGTGTCTC     | 278-282 | 1.5 | 58 | Tozaki et al. 2004 | AB103866 |
| microsatellite | TKY710  | 11 | F: TCAGGAGTTTGGATAGATTTTGC<br>R: TGGAATAACTGAAATGTCCAACA | 210-216 | 1.5 | 58 | Tozaki et al. 2004 | AB103928 |
| microsatellite | TKY906  | 11 | F: CCATGGTGCCTAGTTTAATC<br>R: GCAGTCCTGGTTGAAAATCG       | 225     | 2.0 | 58 | Tozaki et al. 2004 | AB104124 |
| microsatellite | TKY908  | 11 | F: GCATTTGGAGGGCATCTTAG<br>R: ATGCCAAATAAGCAGTTGGG       | 267     | 2.0 | 58 | Tozaki et al. 2004 | AB104126 |
| microsatellite | TKY954  | 11 | F: AGCTCCTCAGGAATCTAATG<br>R: GGACATGTTAACACCTCTCC       | 123     | 2.0 | 58 |                    | AB104172 |
| microsatellite | TKY960  | 11 | F: GATCATGGTCTGCATGTGG<br>R: TGATTCAGACACGGAAGCC         | 192     | 2.0 | 58 |                    | AB104178 |
| microsatellite | TKY978  | 11 | F: TGGCAGTCCAGTATCCATC<br>R: GAACGTGGACACTTAACTGC        | 213     | 2.0 | 58 |                    | AB104196 |
| microsatellite | TKY988  | 11 | F: TCCCAAAGTGAGACTCCTG<br>R: AGAGCTGCTAAATGTAGGTG        | 222     | 2.0 | 58 | Tozaki et al. 2004 | AB104206 |
| microsatellite | TKY1004 | 11 | F: TCTGACTTCAGGTTGTTCTTC<br>R: CACCTATATGCCAACCAGA       | 212     | 2.0 | 58 | Tozaki et al. 2004 | AB104222 |
| microsatellite | TKY1028 | 11 | F: ATGGAGCTGTTAGTGAGTTG<br>R: CCCAACAAGGCAGACAATC        | 102     | 2.0 | 58 |                    | AB104246 |
| microsatellite | TKY1312 | 11 | F: TCCATCTCTGTTCCAATACG<br>R: GAAACAGGCAAGAAAACCAC       | 147     | 1.5 | 58 | Tozaki et al. 2007 | AB215255 |
| microsatellite | TKY2446 | 11 | F: CGCATACATTTGCTCACAAG<br>R: TAACTCTGCCTCTCCAAAGC       | 161     | 1.5 | 58 | Tozaki et al. 2007 | AB216389 |
| microsatellite | TKY2455 | 11 | F: GGCCAAATGGACAATTAGAG<br>R: AACTTGATGTTTCGGTGGTC       | 104     | 1.5 | 58 | Tozaki et al. 2007 | AB216398 |
| microsatellite | TKY2674 | 11 | F: ATCCTAATCCTACAGGGAG<br>R: AAGTCATAGGGGCAGATAG         | 215     | 1.5 | 60 | Tozaki et al. 2007 | AB216617 |

|                          |                  |           |                                                        |      |     |    |                                                     |          |
|--------------------------|------------------|-----------|--------------------------------------------------------|------|-----|----|-----------------------------------------------------|----------|
| microsatellite           | TKY2944          | 11        | F: GATCCACATATGAACTCCTA<br>R: TTACCCCTATGCATTTGTCA     | 114  | 1.5 | 58 | Tozaki et al. 2007                                  | AB216887 |
| microsatellite           | TKY3288          | 11        | F: GATCAGCTTCTCCCCGACAC<br>R: ATTTCCCTCAGCCAGAGCTA     | 170  | 1.5 | 58 | Tozaki et al. 2007                                  | AB217231 |
| microsatellite           | TKY3493          | 11        | F: CATTTAATCAAGCGCCAACT<br>R: CCTGGGTAGTTCTGTGCAGT     | 246  | 1.5 | 58 | Tozaki et al. 2007                                  | AB217436 |
| microsatellite           | TKY3518          | 11        | F: CTGCAGCCAAAATCACTTCT<br>R: TACCGAGAAACACAGGAAGG     | 151  | 1.5 | 58 | Tozaki et al. 2007                                  | AB217461 |
| transmembrane protein 49 | TMEM49           | 11        | F: TTTCTGAAAGCAGTTTAGTCC<br>R: TTGAAGGTGGGAGAGGAAGG    | 381  | 1.5 | 62 |                                                     | CD471078 |
| microsatellite           | UCDEQ039 (CA39)  | 11p14-p13 | F: GCCCTTCACCGATTTAATA<br>R: GAACCCAGCACATTATCGGG      | 188  | 2.0 | 58 | Chowdhary et al. 2002*                              | U25168   |
| microsatellite           | UCDEQ439 (CA439) | 11p14-p13 | F: GTTGATGCTCAGAGGAAGGC<br>R: GGTGCACAGTCCACAAGAAA     | 207  | 2.0 | 58 | Eggleston-Stott et al. 1999; Chowdhary et al. 2002* | U67409   |
| microsatellite           | UMNe085          | 11        | F: GGACATGGCACATTCATGGAC<br>R : AACTTGTGGAAAAGTTGCATGG | 191  | 1.5 | 58 |                                                     |          |
| microsatellite           | UMNe096          | 11        | F: CATCCATGTTGTTGCAATAGG<br>R: AGCCAAGACATGGAAGCAAC    | 150  | 1.5 | 62 |                                                     |          |
| microsatellite           | UMNe116          | 11        | F: TCAAATCCCGAGCTAAAATG<br>R: GATCACATGGGAGAAAATACAC   | 153  | 1.5 | 58 | Wagner et al. 2004c                                 | AY735236 |
| microsatellite           | UMNe128          | 11        | F: TCCATTTTGTCTCTGTCTCCG<br>R: GGCACATTCATGGACATCC     | 121  | 1.5 | 58 |                                                     |          |
| microsatellite           | UMNe143          | 11        | F: AGAAAGGGTAAACAAGAAGCCC<br>R: GACACCTCTGCATCACACATG  | ~110 | 1.5 | 58 | Wagner et al. 2004a                                 | AY391301 |
| microsatellite           | UMNe201          | 11        | F: TATGTGTGAAC TTGGTGGTAGC<br>R: TGCATAAACATACGCTCATGC | 143  | 2.0 | 58 | Mickelson et al. 2004                               | AY731380 |
| microsatellite           | UMNe240          | 11        | F: GACAAGCATCAGCAAAAAGC<br>R: TTGATGACCTTGAAAAGGGC     | 215  | 2.0 | 58 | Mickelson et al. 2003                               | AF536300 |
| microsatellite           | UMNe259          | 11        | F: TCAGGGCTAAACTTCCATTCC<br>R: ACTGAGCGGCCATGACTC      | 144  | 2.0 | 58 | Mickelson et al. 2003                               | AF536321 |
| microsatellite           | UMNe314          | 11        | F: AGGCCCTTGTATATCCCAC                                 | 153  | 2.0 | 58 | Wagner et                                           | AY391335 |



|                                                                          |                          |                                   |                                                         |      |     |          |                                  |          |
|--------------------------------------------------------------------------|--------------------------|-----------------------------------|---------------------------------------------------------|------|-----|----------|----------------------------------|----------|
| microsatellite                                                           | UMNe365                  | 11                                | R: GAGCTGGGAGTGGAAGGAG<br>F: CCCTCGTCTCAGACTTCTGG       | 201  | 2.0 | 58       | al. 2004a<br>Wagner et al. 2004a | AY391351 |
| microsatellite                                                           | UMNe378                  | 11                                | R: GAGGCCTTGCATGTGGAC<br>F: CTAGGGACTCTGGAAAGGGC        | 251  | 2.0 | 58       | Wagner et al. 2004b              | AY464469 |
| microsatellite                                                           | UMNe398                  | 11                                | R: CCACGTAACCCAAGTGTGTG<br>F: TCCGCAGATACTCACACAGG      | 105  | 1.5 | 58       |                                  |          |
| microsatellite                                                           | UMNe423                  | 11                                | R: CCTATATCTACCTTTCGCTGGC<br>F: TGGAAAAAGGAATTTGCAGG    | 252  | 1.5 | 58       |                                  |          |
| microsatellite                                                           | UMNe443                  | 11                                | R: TCTGTGGAGAAGATGATTGGG<br>F: GTGAATAGTAACCAGCCCATCC   | 300  | 1.5 | 58       | Wagner et al. 2004c              | AY735251 |
| microsatellite                                                           | UMNe514                  | 11                                | R: GTATATGTGAAAGTGGGGGTGG<br>F: GGAATTTTGGTTCTCTGACAGG  | ~250 | 1.5 | 58       | Wagner et al. 2004b              | AY464513 |
| microsatellite                                                           | UMNe558                  | 11                                | R: GAACTCTGTGTGTGCATGTGC<br>F: TTGGGAGGAGAGTGCACAG      | ~200 | 1.5 | 58       | Wagner et al. 2004b              | AY464526 |
| ubiquitin specific<br>peptidase 32                                       | USP32<br>( <i>USP6</i> ) | 11                                | R: GCTGAGGCTTTTTTACGCC<br>F: GGTATAATGTGATGAAGTCAGAC    | 435  | 2.0 | TD<br>60 | Chowdhary et al. 2003            | G62170   |
| microsatellite                                                           | VHL060                   | 11                                | R: TGTTTGGATAATAGTTACAGATAA<br>F: GACTGTTTAACCACTACGTGA | ~150 | 1.5 | 62       | van<br>Haeringen et al. 1998     |          |
| microsatellite                                                           | VHL78                    | 11                                | R: CACTACATAGCTTCAAAGTGGA<br>F: CAGGTCTTCTGGAGGAAACC    | ~110 | 1.5 | 58       |                                  |          |
| WD repeat and<br>SOCS box-<br>containing 1<br>zinc finger protein<br>207 | WSB1<br><br>ZNF207       | 11<br><br><b>11q13-<br/>q14.1</b> | R: CTAAGGGCAAAGGAAACAGG<br>F: TTGGCGTGAAGCAGGGAC        | 198  | 1.5 | 60       |                                  | CD528403 |
|                                                                          |                          |                                   | R: CGCAACGACACAGAAGGG<br>F: TGGAACAGTTACAGCCCTCA        | 370  | 2.0 | 65       | Chowdhary et al. 2003            |          |
|                                                                          |                          |                                   | R: AGCCAAGCTTCCGTCAATAAG                                |      |     |          |                                  |          |

| Name                                             | Symbol  | Horse chr. | Primers                                                | Product size (bp) | MgCl <sub>2</sub> (mM) | T <sub>a</sub> | Reference              | Accession No |
|--------------------------------------------------|---------|------------|--------------------------------------------------------|-------------------|------------------------|----------------|------------------------|--------------|
| actinin, alpha 3                                 | ACTN3   | 12q14      | F: GGAGGACTTTTCGGGACTACC<br>R: GAGCAGCCAGTCCTCATAGC    | 308               | 1.5                    | 58             |                        |              |
| adrenergic, beta, receptor kinase 1              | ADRBK1  | 12         | F: GCCCGCTCTAGAGATGAGAA<br>R: CCCATCTTGGACATGTAGCC     | 189               | 2.0                    | 58             | Caetano et al. 1999    | AF134059     |
| microsatellite                                   | AHT027  | 12p13      | F: GAGCAAGTCTTCCTTCCACG<br>R: ACGTGCACACCTGTACGTGT     | 101-109           | 2.0                    | 58             | Swinburne et al. 2000* | AJ271512     |
| microsatellite                                   | AHT056  | 12         | F: TCAAATGTTTGCTTGGAATGG<br>R: TCTCCATCTCCACATAGGCC    | 96-112            | 1.5                    | 50             | Swinburne et al. 2003  |              |
| microsatellite                                   | AHT122  | 12         | F: ATTCAATTACACAAACCCCA<br>R: CACTACCTTCCCCTACGTTCC    | 157               | 2.0                    | 61             |                        |              |
| beta-1,3-glucuronyltransferase 3                 | B3GAT3  | 12         | F: GTGGATCCCAAGGACCTAGA<br>R: CATCTTGGGCTTCTCTGTCC     | 791               | 1.5                    | 65             |                        |              |
| CD44 molecule (Indian blood group)               | CD44    | 12         | F: GACGACAGAAAGGCAAGTGG<br>R: CACCCCAATCTTCATGTCC      | 153               | 1.5                    | 58             |                        |              |
| ciliary neurotrophic factor                      | CNTF    | 12q13      | F: AGCTTACCGTACCTTCCATGTTAT<br>R: AGCTCTTGCAGCACCTTCAG | 261               | 1.5                    | 58             |                        |              |
| microsatellite                                   | COR009  | 12         | F: CGGTGTTCTTATTTTCATGGA<br>R: GGAACGAAACACAGTGGAAC    | 122-130           | 3.0                    | 58             | Hopman et al. 1999     | AF083452     |
| microsatellite                                   | COR030  | 12         | F: CTGGCTGTTTAGCATTCCAC<br>R: ACTGGCATCTCAGTTTGGAG     | 233-241           | 3.0                    | 55             | Murphie et al. 1999    | AF101399     |
| microsatellite                                   | COR058  | 12         | F: GGGAAGGACGATGAGTGAC<br>R: CACCAGGCTAAGTAGCCAAAG     | 206-228           | 2.0                    | 55             | Ruth et al. 1999       | AF108375     |
| dopamine receptor D4                             | DRD4    | 12         | F: AGACCCAGAAACAGGCAA<br>R: GCTTTCCTCGACCCAAACC        | 433               | 2.0                    | 60             | Momozawa et al. 2007   |              |
| eukaryotic translation elongation factor 1 gamma | EEF1G   | 12         | F: CGTCATCCTCTTTGGAACC<br>R: CCTGATTGAAGGCTTTGC        | 453               | 1.5                    | 58             |                        |              |
| F-box and leucine-rich repeat protein 11         | FBXL11  | 12         | F: TGGAAAGATGGAGGCAGGGT<br>R: CGCACGTAAATTGGTCAGCAG    | 270               | 2.0                    | 58             |                        |              |
| F-box protein 3                                  | FBXO3   | 12p14-p13  | F: GGTGAATTTCCAATCATCAGC<br>R: CGAGCTATAGACACCCTGAATG  | 188               | 1.5                    | 55             | Perrocheau et al. 2006 | DX010476     |
| HRAS-like suppressor 3                           | HRASLS3 | 12         | F: CTCAAGAAACAAGCGACAAAAGC<br>R: CACAAACCAAACCTCAAAGC  | 113               | 1.5                    | 58             |                        |              |
| interferon induced transmembrane protein 3       | IFITM3  | 12         | F: TCGTGGCCTTCGCCTACT<br>R: ATGTTCAAGGCACTTGGCAGT      | 1000              | 1.5                    | 58             |                        | BI961736     |

|                                                                  |         |       |                                                            |     |     |    |                                                                       |                                   |
|------------------------------------------------------------------|---------|-------|------------------------------------------------------------|-----|-----|----|-----------------------------------------------------------------------|-----------------------------------|
| insulin-like growth factor 2                                     | IGF2    | 12q14 | F: AGCCGTAGGGTGATTGACAG<br>R: GTATCTGGGGGAGTCGTCCT         | 162 | 4.0 | 58 | Raudsepp et al. 1997;<br>Lindgren et al. 1998;<br>Caetano et al. 1999 | AF097586,<br>AF020598<br>AF020599 |
| leucine rich repeat and fibronectin type III domain containing 4 | LRFN4   | 12    | F: GCCAAATTTTCCTGAACTG<br>R: CCATTGGGAGTAAAGTCA            | 162 | 1.5 | 58 |                                                                       | BI961933                          |
| lymphocyte-specific protein 1                                    | LSP1    | 12    | F: GAGCAAGAAAAGCCTCTGG<br>R: CGAGCACCTTCTCATATTTCC         | 285 | 1.5 | 58 |                                                                       |                                   |
| MAP-kinase activating death domain                               | MADD    | 12    | F: GCCATTTCCGTATGGTCTGC<br>R: AACCATCTCTTGCCCACTGC         | 211 | 1.5 | 58 |                                                                       |                                   |
| membrane-spanning 4-domains, subfamily A, member 1               | MS4A1   | 12    | F: GTGTGCCAGGAGTTGTGCTA<br>R: GCATCACTGCAAAAATGCTC         | 204 | 2.0 | 58 | Caetano et al. 1999                                                   | AF130748                          |
| NAD synthetase 1                                                 | NADSYN1 | 12    | F: CGAACAGACACAAGATGACC<br>R: CGGTGTGGTAGAGAAATGG          | 102 | 1.5 | 58 |                                                                       |                                   |
| phosphorylase, glycogen                                          | PYGM    | 12q14 | F: CCCTGACAGACCAGGAGAAG<br>R: GCCAGCGCGAAGTAGTAGTC         | 160 | 1.5 | 66 |                                                                       |                                   |
| recombination activating gene 1                                  | RAG1    | 12    | F: AGCACATGGCTCACAGAATG<br>R: CCCGAAAGATGAACTGGAAA         | 227 | 2.0 | 58 |                                                                       | AF447516                          |
| recombination activating gene 2                                  | RAG2    | 12    | F: GTGTTCTCTTTGGAGGACGG<br>R: TCTGTATAGGTTGGCAGGGC         | 260 | 2.0 | 62 |                                                                       | AY011974                          |
| microsatellite                                                   | RKJ12   | 12    | F: CTTGCGTAATTCTGGATCAGC<br>R: CAGCAACAACAGCAACAACA        | 200 | 4.0 | 60 | Chowdhary et al. 2003                                                 |                                   |
| retinal outer segment membrane protein 1                         | ROM1    | 12    | F: CAGGTGAGTCAGCAACGTGT<br>R: GTTCTCCCTCCCCATTGAT          | 195 | 2.0 | 58 | Shubitowski et al. 2001                                               | AY008811                          |
| ribosomal protein, large, P2                                     | RPLP2   | 12    | F: CATCAAGAAGATTCTGGACAGC<br>R: CAATACCCTGGGCAATAACG       | 600 | 0.5 | 58 |                                                                       |                                   |
| secretoglobulin, family 1A, member 1                             | SCGB1A1 | 12q13 | F: CTGAAGACGCTGGTGGACTT<br>R: CAGCTTCTAAATCCTAAGCACACA     | 450 | 1.5 | 58 |                                                                       |                                   |
| microsatellite                                                   | SGCV08  | 12    | F: GAGTTCATTCTTTTTTCGTGGCTG<br>R: GGAAACACCCTAAGTGTCCCTTG  | 128 | 1.5 | 50 | Godard et al. 1997                                                    | U90590                            |
| microsatellite                                                   | SGCV10  | 12p13 | F: CATCCATCCTTTCCAGCTCGATATTC<br>R: CAAGACCGTAACTCAGGAGCCC | 172 | 3.0 | 58 | Godard et al. 1997                                                    | U90591                            |

|                                  |                 |           |                                                             |         |     |    |                             |          |
|----------------------------------|-----------------|-----------|-------------------------------------------------------------|---------|-----|----|-----------------------------|----------|
| tyrosine hydroxylase             | TH              | 12        | F: TGAATGCAACCACATGACCT<br>R: GAAAAGGAGCCGAGTGAGTG          | 241     | 1.5 | 58 |                             | AB167791 |
| microsatellite                   | TKY286          | 12        | F: TCCTTAACAACAAAGACACC<br>R: ATGGGCATATTAAGATGCAC          | 94-112  | 2.0 | 58 | Tozaki et al. 2000b         | AB033937 |
| microsatellite                   | TKY404          | 12        | F: TTGTCAGTGTGTGAGGAGATCA<br>R: TGCAGAGCAGCAATTTCATT        | 190-196 | 1.5 | 55 | Tozaki et al. 2004          | AB103622 |
| microsatellite                   | TKY482          | 12        | F: TAAAGAAAATGTGATACACATAC<br>R: TTGCATTTCTCTCTCTGATTTATTTT | 198     | 2.0 | 58 |                             | AB103700 |
| microsatellite                   | TKY499          | 12        | F: GATGCCCTCTGGCTAGTGTT<br>R: TAGAGACCCACCTGCTGCTT          | 122-178 | 1.5 | 55 |                             | AB103717 |
| microsatellite                   | TKY683          | 12        | F: CAATGGTGAAAATCTCTTTCCAG<br>R: AGGTACAGCCCTGGTGTAATA      | 160-174 | 1.5 | 58 | Tozaki et al. 2004          |          |
| microsatellite                   | TKY734          | 12        | F: TGGCGTCTCACACACAAAAT<br>R: TTCAGCAGGGTGGATAAAGG          | 172-184 | 1.5 | 50 | Tozaki et al. 2004          |          |
| microsatellite                   | TKY769          | 12        | F: CCAGCGTGCCACCTGTTC<br>R: GTCAGTGTCTTTCTCCTGT             | 243     | 2.0 | 58 | Tozaki et al. 2004          | AB103987 |
| microsatellite                   | TKY823          | 12        | F: AGGGTTCACACAATTGATTG<br>R: AGTGCCTCCCAGTGATTAG           | 114     | 2.0 | 58 |                             | AB104041 |
| microsatellite                   | TKY1075         | 12        | F: AGTACCATGTACTGCATAGC<br>R: AATTGCTTAGCCTAGCAGAC          | 107     | 2.0 | 58 |                             | AB104293 |
| microsatellite                   | TKY1143         | 12        | F: GAGCACTGGTTTTGTATAGC<br>R: GTTTTGATTTGCCCATGCAC          | 226     | 1.5 | 58 |                             | AB104361 |
| TNF receptor-associated factor 6 | TRAF6           | 12p14-p13 | F: ACAGTTAGAGGGTCGCCTTGT<br>R: GATTTCAAGTGCATCCCAAAG        | 198     | 1.5 | 55 | Perrocheau et al. 2006      | DX010602 |
| microsatellite                   | UCDEQ411        | 12        | F: TGCTGCGAGTCAGTGGCT<br>R: ATGCCTCACATCCCTGGGT             | 77-93   | 2.0 | 58 | Eggleston-Stott et al. 1999 | U67405   |
| microsatellite                   | UCDEQ497        | 12        | F: GTGGGAGGCAGCAGGAAC<br>R: CCCCAGACACCGTGTGAT              | 105-109 | 2.0 | 58 | Eggleston et al. 1999       | U67419   |
| microsatellite                   | UMNe109         | 12        | F: TGGCTCAAATTCTGTGGTTG<br>R: TTTTCCTTCCCTCAATATCTGTATC     | 180     | 1.5 | 55 | Mickelson et al. 2003       | AF536252 |
| microsatellite                   | UMNe165/193/260 | 12        | F: CAGCCCTGGTCTAAAATTTACC<br>R: TCAATGGTGAAAATCTCTTTCC      | 160     | 2.0 | 58 | Mickelson et al. 2003       | AF536272 |
| microsatellite                   | UMNe168         | 12        | F: CACCAAACCCCACTGAATTC<br>R: CACTACCTTCCCCTACGTTCC         | 149     | 2.0 | 58 | Wagner et al. 2004          | AY391308 |
| microsatellite                   | UMNe191         | 12        | F: GGTGATGTGTCCACACTTGC<br>R: CGAAAAAGATAGTCCACCGG          | 142     | 2.0 | 58 | Mickelson et al. 2003       | AF536279 |

|                |         |    |                                                      |     |     |    |                     |
|----------------|---------|----|------------------------------------------------------|-----|-----|----|---------------------|
| microsatellite | UMNe223 | 12 | F: GTCTGTCCCAGACATATACCCC<br>R: AACCTGGGCAAGGGAAAG   | 112 | 2.0 | 58 | Wagner et al. 2004a |
| microsatellite | UMNe329 | 12 | F: TGTTTGCTTGGAATGGTCAG<br>R: TCTCCATCTCCACATAGGCC   | 104 | 2.0 | 58 | Wagner et al. 2004a |
| microsatellite | UMNe331 | 12 | F: TAGCCATGATATGGAAACAACC<br>R: ACTGTCCATCCATGTTGCTG | 158 | 1.5 | 64 |                     |
| microsatellite | UMNe391 | 12 | F: ATCAGGTCTGAAGGTGGCC<br>R: GAATCTTATTGGTCCAGCTTGG  | 187 | 2.0 | 62 | Wagner et al. 2004b |
| microsatellite | UMNe469 | 12 | F: CCACGCTCCCATCTTTTG<br>R: CTTTCATGCTCTTTTCTCCCC    | 156 | 1.5 | 60 | Wagner et al. 2004b |

| Name                                                                 | Symbol   | Horse chr.   | Primers                                                | Product size (bp) | MgCl <sub>2</sub> (mM) | T <sub>a</sub> | Reference                            | Accession No |
|----------------------------------------------------------------------|----------|--------------|--------------------------------------------------------|-------------------|------------------------|----------------|--------------------------------------|--------------|
| sequence tagged site                                                 | 13STS01  | 13           | F: AGCTGACCGTCAAGACCAAG<br>R: CGACTGGGTGGCTGACTT       | ~900              | 1.5                    | 55             |                                      | BM780447     |
| actin, beta                                                          | ACTB     | 13           | F: CGACATCCGTAAGGACCTGT<br>R: GTGGACAATGAGGCCAGAAT     | 332               | 1.5                    | 58             |                                      |              |
| microsatellite                                                       | AHT030   | <b>13q13</b> | F: TCACCGCTCACCTTTTGAC<br>R: CGTGCAGGTGTACATTTACATG    | 181-183           | 2.0                    | 58             | Swinburne et al. 2000                | AJ271515     |
| microsatellite                                                       | AHT095   | 13           | F: CATTCTCCAGGGATTAACATTG<br>R: ACCATAATGAGCTAAGGAAGCA | 217-233           | 2.0                    | 58             | Swinburne et al. 2003                | AJ507712     |
| aldolase A, fructose-bisphosphate                                    | ALDOA    | 13           | F: CATCAACCTCAACGCCATC<br>R: GGCATGGTTAGAGATGAAGAGG    | 327               | 1.5                    | 58             |                                      |              |
| actin related protein 2/3 complex, subunit 1B, 41kDa                 | ARPC1B   | 13           | F: CAAGTAACACAACCCTGAGTC<br>R: GCTCTCCACACTATCTCCAAAC  | 190               | 1.5                    | 52             |                                      |              |
| microsatellite                                                       | ASB01    | 13           | F: AGCAGAAACCCACTCAAGCC<br>R: GCATAATACCCTCAAGGTC      | 153               | 2.0                    | 58             | Breen et al. 1997                    | X95316       |
| microsatellite                                                       | ASB37    | 13q11-q12    | F: CCTGCAACTTTTTCCCAGCC<br>R: GGCAGATGTTAGCTCATGGC     | 125-138           | 1.5                    | TD 64          | Irvin et al. 1998; Lear et al. 1999* | AF004767     |
| ATPase, Ca <sup>++</sup> transporting, cardiac muscle, fast twitch 1 | ATP2A1   | 13           | F: CCCTCCTCCATCTCTTTGAA<br>R: CTGAAGATGCGTCGCTATGA     | 545               | 1.5                    | 58             |                                      |              |
| autism susceptibility candidate 2                                    | AUTS2    | 13           | F: GACACACCTCAGTGGGAACC<br>R: CCATCAGTTACCGCACACAG     | 167               | 1.5                    | 54             |                                      |              |
| alpha-2-glycoprotein 1, zinc-binding                                 | AZGP1    | 13           | F: CCCAGGAAAAGAGAGGACAC<br>R: TGGGCCAGACGATTATTACTG    | 503               | 1.5                    | 58             |                                      | BM780848     |
| bifunctional apoptosis regulator                                     | BFAR     | 13           | F: TGACGTCTGAGGTTTGATGC<br>R: GCTGTGTTGTCCCAGCTCTA     | 189               | 1.5                    | 63             |                                      | CX602272     |
| chromosome 16 open reading frame 53                                  | C16orf53 | 13           | F: GACCGCTGTTGGAATCTGA<br>R: GCCGTAATGTCTCCATGACC      | 158               | 1.5                    | 58             |                                      | CX597497     |
| chromosome 16 open reading frame 63                                  | C16orf63 | 13           | F: GAGGCGTGTTAGGGCATTTA<br>R: TGCCATGAGGACAGATGCT      | 173               | 1.5                    | 63             |                                      | DN507486     |
| chromosome 16 open                                                   | C16orf72 | 13           | F: GCTGAAGTAGCTCGGCTAGG                                | 146               | 1.5                    | 62             |                                      | DN504887     |

|                                                                     |                     |               |                           |         |     |     |                                                             |          |
|---------------------------------------------------------------------|---------------------|---------------|---------------------------|---------|-----|-----|-------------------------------------------------------------|----------|
| reading frame 72                                                    |                     |               | R: GATGTGTTGGCTTGGGTT     |         |     |     |                                                             |          |
| calcium regulated                                                   | CARHSP1             | 13            | F: TGCTGGACACCCAACAGG     | ~863    | 1.5 | 63  |                                                             | CX593894 |
| heat stable protein 1,<br>24kDa                                     |                     |               | R: CCTTGGATCGACAGAAGCAT   |         |     |     |                                                             |          |
| chaperonin                                                          | CCT6A               | 13            | F: TAGGCTCATTTTTGTGGCAG   | 381     | 1.5 | 58  |                                                             |          |
| containing TCP1,<br>subunit 6A                                      |                     |               | R: AGAAGTTGAGACACTTACGTTG |         |     |     |                                                             |          |
| BAC end sequence                                                    | CH241-<br>102019_T7 | 13            | F: GAGCAGGGAGAAGAGACG     | 243     | 1.5 | 59  |                                                             | AJ584539 |
|                                                                     |                     |               | R: CCCATCTTGGCTTACCTG     |         |     |     |                                                             |          |
| BAC end sequence                                                    | CH241-<br>106P18_T7 | <b>13q16</b>  | F: ACCAACCCCTAGCTTAGAGTG  | 152     | 1.5 | 58  |                                                             | CT008340 |
|                                                                     |                     |               | R: CAACTGAGGCAACATTAGCAT  |         |     |     |                                                             |          |
| coenzyme Q7                                                         | COQ7                | 13            | F: GAAATTCGGGATGAAGAGC    | ~811    | 1.5 | 58  |                                                             | CX604694 |
| homolog, ubiquinone<br>(yeast)                                      |                     |               | R: CATCCGACCTGGATAATGCT   |         |     |     |                                                             |          |
| microsatellite                                                      | COR069              | 13            | F: AGCCACCAGTCTGTTCTCTG   | 265-283 | 2.0 | 55  | Tallmadge<br>et al. 1999a                                   | AF142606 |
|                                                                     |                     |               | R: AATGTCCTTTGGTGGATGAAC  |         |     |     |                                                             |          |
| coronin, actin binding<br>protein, 1A                               | CORO1A              | 13            | F: CCTCCTCATTTCCTCAAG     | 284     | 1.5 | 63  |                                                             |          |
|                                                                     |                     |               | R: GGAGCTTCCTCATCTCTTCC   |         |     |     |                                                             |          |
| CREB binding<br>protein                                             | CREBBP              | 13            | F: CATTCCAGCAGGAGGGATAA   | 534     | 1.5 | 62  |                                                             | CX594454 |
|                                                                     |                     |               | R: GGTCCTGAGTGACATGTTTCG  |         |     |     |                                                             |          |
| hypothetical protein<br>DKFZp434J1015                               | DKFZp434J1015       | 13            | F: GTGCTCTCCAAGGTCCAAAG   | 266     | 1.5 | 58  |                                                             | CX597697 |
|                                                                     |                     |               | R: CTACCGTCCTGCTCTTACGG   |         |     |     |                                                             |          |
| eukaryotic translation<br>initiation factor 3,<br>subunit 8, 110kDa | EIF3S8              | <b>13q13</b>  | F: AGAACCTGGCTCTGCAGCTA   | 295     | 60  | 1.5 |                                                             | CX604676 |
|                                                                     |                     |               | R: GGACAGAAGTGACGCAATCA   |         |     |     |                                                             |          |
| elastin                                                             | ELN                 | 13p13         | F: CAGGCCTGTAGGCTGCTTAT   | 182     | 3.0 | 58  | Milenkovic<br>et al.<br>2002* ;<br>Chowdhary<br>et al. 2003 | AF130761 |
|                                                                     |                     |               | R: CACCTGTGAAGAGGGCAGAT   |         |     |     |                                                             |          |
| erythroid associated<br>factor                                      | ERAF                | 13            | F: GTGACCGTGGTGAATGACTG   | 163     | 1.5 | 58  |                                                             |          |
|                                                                     |                     |               | R: AGGACTTCAGGAAGGCCCTA   |         |     |     |                                                             |          |
| guanine nucleotide<br>binding protein, beta<br>polypeptide 2        | GNB2                | 13            | F: CTGAGCTTTTGTTTTGCCTG   | 158     | 1.5 | 56  |                                                             |          |
|                                                                     |                     |               | R: GTCCTGTTTCCTATCCCCTG   |         |     |     |                                                             |          |
| G protein-coupled                                                   | GPR30               | <b>13p15-</b> | F: GCTGGTCTTCTTCGTCTGCT   | 212     | 1.5 | 51  |                                                             |          |

|                                                                         |                             |                       |                                                                              |         |     |    |                                                                                      |          |
|-------------------------------------------------------------------------|-----------------------------|-----------------------|------------------------------------------------------------------------------|---------|-----|----|--------------------------------------------------------------------------------------|----------|
| receptor 30<br>glucuronidase, beta                                      | GUSB                        | <b>p14</b><br>13      | R: TCAGCTTGTCCTGAAGGTC<br>F: CCAACGAAGCAGGTTGAAGT<br>R: AAAACTGCTGCCCGATAGAG | 198     | 2.0 | 58 | Chowdhary<br>et al. 2003                                                             | AF134223 |
| hemoglobin, alpha 1                                                     | HBA1                        | 13qter                | F: CTGTCGAATCTGAGCGACCT<br>R: GTGGATCGAGGGAGTGTCTAG                          | 170     | 2.0 | 58 | Oakenfull et<br>al. 1993*;<br>Shubitowski<br>et al. 2001;<br>Chowhary et<br>al. 2003 | AY008792 |
| huntingtin interacting<br>protein 1                                     | HIP1                        | 13                    | F: CTGTTCTACCGCTCCAGCA<br>R: CTCTAGGACTGGCTCGCTGT                            | 171     | 1.5 | 54 |                                                                                      |          |
| hematological and<br>neurological<br>expressed 1-like                   | HN1L<br>( <i>C16orf34</i> ) | 13                    | F: GAACAGGCTGCAGAACAAACA<br>R: AAGCCTTTGAAAGCAAACCA                          | 225     | 1.5 | 62 |                                                                                      | DN506642 |
| interleukin 4 receptor                                                  | IL4R                        | 13                    | F: GACTACATCAGCATCTCCAC<br>R: CTTGAAGGAGCTGTTCCAC                            | 370     | 1.5 | 58 | Solberg et<br>al. 2004                                                               | AY081138 |
| KDEL endoplasmic<br>reticulum protein<br>retention receptor 2           | KDELR2                      | 13                    | F: TCAGTCTGCCAGCGTAAGTG<br>R: AAGGCAAGATGCATTAAACAG                          | 205     | 1.5 | 58 |                                                                                      | CX605749 |
| microsatellite                                                          | LEX041                      | <b>13q12-<br/>q13</b> | F: TATTTTCTGAATGCTTCTGTGC<br>R: CTCTACACCCAATGCCTGAT                         | 149-162 | 3.0 | 58 | Coogle et al.<br>1997                                                                | AF075643 |
| leucine-rich repeats<br>and calponin<br>homology domain<br>containing 4 | LRCH4                       | 13                    | F: CCTCATTCTGGCCACTGTATG<br>R: CAGAGGGTCGGAAAGAAAGAC                         | 246     | 1.5 | 62 |                                                                                      | BI961649 |
| methyltransferase like<br>9                                             | METTL9                      | 13                    | F: AAGACTTCGGCCTCCACGTG<br>R: GAAACCATCAGAAATTTTGG                           | 211     | 1.5 | 60 |                                                                                      | CX602521 |
| hypothetical protein<br>MGC11257                                        | MGC11257                    | 13                    | F: TCTCCACCTTGCTGGCTTAC<br>R: TAGGAGAGCAGCTGGAGCAC                           | 172     | 1.5 | 58 |                                                                                      | CX600886 |
| microsatellite                                                          | NVHEQ098                    | 13                    | F: TGCAATGACCATCAGAACTTC<br>R: CGGTGGTTTTTGAAATGAA                           | 167-169 | 4.0 | 50 | Roed et al.<br>1998                                                                  | AF056398 |
| phosphorylase kinase,<br>gamma 1 (muscle)                               | PHKG1                       | 13                    | F: GCATCCACAAGCCCACAT<br>R: ATGTTGGGGTGCCCTGAA                               | 151     | 1.5 | 58 |                                                                                      |          |
| P450 (cytochrome)<br>oxidoreductase                                     | POR                         | 13p13                 | F: GGGAACAAGACCTACGAGCA<br>R: CTTCCACCCCAAAGTGTTCA                           | ~600    | 1.5 | 58 |                                                                                      |          |
| protein kinase C, beta                                                  | PRKCB1                      | 13q13                 | F: GACACCTCCAATTCGACAAA                                                      | 174     | 1.5 | 55 | Perrocheau                                                                           | DX010562 |



|                                               |          |                  |                                                                                |         |     |    |                       |          |
|-----------------------------------------------|----------|------------------|--------------------------------------------------------------------------------|---------|-----|----|-----------------------|----------|
| 1                                             |          |                  | R: ACACTCCAGGCTTACAATGGA                                                       |         |     |    | et al. 2006*          |          |
| PRKR interacting protein 1                    | PRKRIP1  | <b>13p13-p12</b> | F: GCCCAAGAAAGAGCCACAA                                                         | ~1200   | 1.5 | 58 |                       |          |
| protamine 1                                   | PRM1     | 13q14-q15        | R: TTACATCTCGGACAAATTCTGGG<br>F: CCTCCTATGAGGTCACATG<br>R: CCTCGCAGACCAGAGCTGT | 407     | 3.0 | 58 | Lindgren et al. 2001* | L10654   |
| retinoblastoma binding protein 6              | RBBP6    | 13               | F: TGATGAAGCTGCTTTTGAACC                                                       | 175     | 1.5 | 62 |                       | CX605509 |
| serpin peptidase inhibitor, clade E, member 1 | SERPINE1 | <b>13p13-p12</b> | R: GCTCCTGTTACGCCTATTT<br>F: GGAACAAGGATGAGATCACCA<br>R: ACCTGCTTGACTGTGGTGTG  | 115     | 1.5 | 58 |                       | AF508034 |
| microsatellite                                | SGCV03   | 13q12            | F: GATGGCAACCCTGAAACAAG<br>R: TTTGCCATGTGTGAGGCTAC                             | 249     | 1.5 | 61 | Godard et al. 1997*   | U90586   |
| PI-3-kinase-related kinase SMG-1              | SMG1     | 13               | F: ACACGGAGATTGTCTTTCTGC<br>R: TTCCTTGGCTGTGATTCTTC                            | 196     | 1.5 | 55 | Perrocheau AG 2006    | DX010586 |
| specific E3 ubiquitin protein ligase 1        | SMURF1   | 13               | F: TTGAGTCCATTCAAAAAGTCC<br>R: CAGGAAGGTGGCTTTAGAGG                            | 401     | 1.5 | 58 |                       | CX599658 |
| STIP1 homology and U-box containing protein 1 | STUB1    | 13               | F: GCAAAGACATCGAGGAGCA<br>R: GATGAATGCGTCGATGACC                               | 205     | 1.5 | 58 |                       |          |
| THO complex 6 homolog (Drosophila)            | THOC6    | 13               | F: GGCCCAGCACTTACTCTCTG<br>R: GGCTGCTGGTTGAGGCTA                               | 301     | 1.5 | 62 |                       | DN507406 |
| microsatellite                                | TKY031   | 13p15            | F: CTACTCACCAGCCTGCAAAG<br>R: CTGCTTGTCTTCTCATCTCC                             | 95      | 2.0 | 58 | Hirota et al. 2001*   | AB048337 |
| microsatellite                                | TKY371   | 13               | F: AACGTGGGAAAGTGCTTCTG<br>R: CTGTCCAAAGACAATCCCTG                             | 164-182 | 1.5 | 58 | Tozaki et al. 2001    | AB044871 |
| microsatellite                                | TKY416   | 13               | F: GTCCAGGGACTGAACTTTTCG<br>R: AGCCCGGAGCATCTTGTAAGT                           | 132-142 | 1.5 | 55 | Tozaki et al. 2004    | AB103634 |
| microsatellite                                | TKY421   | 13               | F: CCTTGTAGGAGGCGAGTCAG<br>R: GCCACTTCCTACCAATGCTC                             | 270-292 | 1.5 | 58 | Tozaki et al. 2004    | AB103639 |
| microsatellite                                | TKY500   | 13               | F: CAACCCAAATGTCCACCAAC<br>R: TGGTACTCTGTTTCTAGCAG                             | 275     | 2.0 | 58 |                       | AB103718 |
| microsatellite                                | TKY561   | 13               | F: TCTGCTCAGTTCCCAACACA<br>R: ACTGCACAGAACAGGGCTTC                             | 294-306 | 1.5 | 58 | Tozaki et al. 2004    | AB103779 |
| microsatellite                                | TKY581   | 13               | F: AAGAAGGGCTGGTGACCTCT<br>R: GGCAGCACTATTGGCTCTTC                             | 165-179 | 1.5 | 60 | Tozaki et al. 2004    | AB103799 |

|                                                                |         |              |                                                     |         |     |    |                       |          |
|----------------------------------------------------------------|---------|--------------|-----------------------------------------------------|---------|-----|----|-----------------------|----------|
| microsatellite                                                 | TKY585  | 13           | F: GCAGCCTGAGGAAATGAAGT<br>R: TTATGACCCCCACTCTCCTG  | 122-136 | 1.5 | 58 | Tozaki et al.<br>2004 | AB103803 |
| microsatellite                                                 | TKY594  | 13           | F: CAGAGGGAAGAGCCAGGAG<br>R: AAAAGGTGATGGGCACAGTT   | 115-135 | 1.5 | 58 | Tozaki et al.<br>2004 | AB103812 |
| microsatellite                                                 | TKY693  | 13           | F: CAGAGACTGCTGTCAGCTCCT<br>R: CACAAATGCAGAACCCACAA | 201-217 | 1.5 | 56 | Tozaki et al.<br>2004 | AB103911 |
| microsatellite                                                 | TKY835  | 13           | F: AGATTGGCACAGACATTAGC<br>R: ATTTCCAGATGGGAAAGAGG  | 255     | 2.0 | 58 |                       | AB104053 |
| microsatellite                                                 | TKY852  | 13           | F: CTGACCTGCATTGACCTTTA<br>R: CATTGTGTATGCTGACTGGC  | 105     | 2.0 | 58 |                       | AB104070 |
| microsatellite                                                 | TKY979  | 13           | F: AGTAACGGCTGCTATTGTAG<br>R: TCCAAACCAGTTCCTATGTC  | 237     | 1.5 | 58 |                       | AB104197 |
| microsatellite                                                 | TKY981  | 13           | F: TCACAGCATTAGCATTGCAG<br>R: CAGGAGGGAAGAATACAAG   | 116     | 2.0 | 55 |                       | AB104199 |
| microsatellite                                                 | TKY1025 | 13           | F: TCCCTACTTCTCTTGAATGC<br>R: AATGCAGTTCTCTGATGACC  | 120     | 2.0 | 58 |                       | AB104243 |
| microsatellite                                                 | TKY1047 | 13           | F: ACAGGAATGGACGAGAATTC<br>R: AGAAGAATCTCTGGGTATGG  | 156     | 2.0 | 58 |                       | AB104265 |
| microsatellite                                                 | TKY1092 | 13           | F: GGGAAAGGAAGGTCAATATAC<br>R: AGAGCCAGGCTGATTCTTG  | 220     | 2.0 | 58 |                       | AB104310 |
| microsatellite                                                 | TKY1176 | 13           | F: GATCTGGAGTTGCAAACCTCA<br>R: AAGGAAGTGGGAATTGGAGC | 173     | 2.0 | 58 |                       | AB104394 |
| microsatellite                                                 | TKY1398 | 13           | F: TGTCTGAAATATGGGGCTG<br>R: TCCAGAGAAGGCTAATTTG    | 175     | 1.5 | 58 | Tozaki et al.<br>2007 | AB215341 |
| microsatellite                                                 | TKY3276 | 13           | F: GGGAGACGAGAGAGAAAAGG<br>R: ATGTTCCAGAGGGGAGACAC  | 165     | 1.5 | 58 | Tozaki et al.<br>2007 | AB217219 |
| transformation/<br>transcription domain-<br>associated protein | TRRAP   | 13           | F: AGAGCCTCTGGCACATAAGAC<br>R: CCACCCATCACACAAGAGG  | 311     | 1.5 | 58 |                       | CR955442 |
| tuberous sclerosis 2                                           | TSC2    | <b>13q16</b> | F: TATCCCTCCAAGTGGATTGC<br>R: AGTCGTCCACGGAAGAGATG  | 328     | 1.5 | 62 |                       | CX601414 |
| ubiquitin-binding<br>protein homolog                           | UBPH    | 13           | F: TGCCATGCAGAAAGTCATGT<br>R: GGCTCCTTCTGTTCTCCTC   | 183     | 1.5 | 63 |                       | DN507077 |
| microsatellite                                                 | UM030   | 13           | F: CCGTGAAGTCACAGACTTAG<br>R: ACAGTTTCTACAACAACTGA  | 127-143 | 2.0 | 58 | George et al.<br>1998 | AF195577 |

|                |         |              |                                                        |      |     |    |                           |          |
|----------------|---------|--------------|--------------------------------------------------------|------|-----|----|---------------------------|----------|
| microsatellite | UMNe126 | 13           | F: CAAGCTGCACTGTGGTGG<br>R: TGCAGCTCAACAATGGTACTG      | 174  | 1.5 | 58 | Mickelson et al. 2003     | AF536256 |
| microsatellite | UMNe133 | 13           | F: CCAGGTATGTCACTAGGTGTGG<br>R: TCCCTGTCCTTGCTGTGTC    | 174  | 1.5 | 58 | Mickelson et al. 2003     | AF536258 |
| microsatellite | UMNe145 | 13           | F: ACAGCCACTCCCCATTACC<br>R: TCCAAAAATTTCTCATGCC       | 110  | 1.5 | 58 | Mickelson et al. 2003     | AF536261 |
| microsatellite | UMNe217 | 13           | F: CTTTGAGTTCACCAGTTCTCCC<br>R: AACCAAAAGGAACCTTGGTGG  | 151  | 2.0 | 58 | Wagner et al. 2004a       | AY391320 |
| microsatellite | UMNe276 | <b>13q13</b> | F: CATGCTCTCCATGACTTTTCC<br>R: CACCCAGGACTCCCACAG      | 154  | 2.0 | 58 | Wagner et al. 2004a       | AY391331 |
| microsatellite | UMNe278 | 13           | F: CAATTATGTGGGCACTGTGC<br>R: AGCAGATACCTGACATCATTGC   | 185  | 2.0 | 58 |                           |          |
| microsatellite | UMNe305 | 13           | F: ACAGTTCACAGCGGCCTC<br>R: GAGAGGGAGCAAGCCCTC         | 162  | 2.0 | 58 | Wagner et al. 2004a       | AY391333 |
| microsatellite | UMNe344 | <b>13q13</b> | F: ATCAGCGCACACCTAGTAGAG<br>R: GAGACACTCTGTAGGGGATTGG  | 130  | 2.0 | 55 | Wagner et al. 2004c       | AY735241 |
| microsatellite | UMNe364 | <b>13q16</b> | F: TCCATACCCCTGAACTGCTC<br>R: AGAGCTAAATGAGAGGGGGC     | 156  | 2.0 | 62 |                           |          |
| microsatellite | UMNe431 | 13           | F: CAAGGTAAGGGTCAATCAGAGG<br>R: AAGGGTCAGGTGCTAGAAAGC  | 270  | 1.5 | 58 | Wagner et al. 2004c       | AY735250 |
| microsatellite | UMNe451 | 13           | F: GGCAACAGATGTTAGCTTAGGG<br>R: TCAGGTGTTTCCAACCTGTTCC | 268  | 1.5 | 60 | Wagner et al. 2004b       | AY464488 |
| microsatellite | UMNe462 | 13           | F: GATCTGGAACCCACATGG<br>R: ATGTTGCAGAGAAAGGGGG        | 303  | 1.5 | 62 | Wagner et al. 2004b       | AY464491 |
| microsatellite | UMNe552 | 13           | F: ACCTCTCTGTGCTTCAGTTTCC<br>R: TTCAGTGAACCACTTTGTTCTG | ~300 | 1.5 | 58 | Wagner et al. 2004b       | AY464524 |
| microsatellite | UMNe601 | 13           | F: CTCTAAACCCAAGGATGAGATG<br>R: CACAGCTCACATTCTCTGCC   | 108  | 1.5 | 58 |                           |          |
| vasorin        | VASN    | 13           | F: GACCTCGGTCTCCTCATCTG<br>R: TGTGTTACCAGCACACAGCA     | 162  | 1.5 | 6  |                           | CX594894 |
| microsatellite | VHL161  | 13           | F: GTTCCACCTTCCTCTGGATC<br>R: GTGTGTCGCTAGGATTCAATCA   | 175  | 2.0 | 58 | Van Haeringen et al. 1998 | Y11661   |

|                                                        |        |    |                                                             |         |     |    |                                 |          |
|--------------------------------------------------------|--------|----|-------------------------------------------------------------|---------|-----|----|---------------------------------|----------|
| microsatellite                                         | VHL47  | 13 | F: GTTTGCTGTGGTTACCAGGCAGA<br>R: GCAAATTGAATATTTGAAGTTGAGAC | 126-144 | 4.0 | 58 | Van<br>Haeringen et<br>al. 1998 | X86449   |
| vitamin K epoxide<br>reductase complex,<br>subunit 1   | VKORC1 | 13 | F: GGCATCTACTCTGCTGTTGCT<br>R: ACCTCCCGGAAGCTGAGTAT         | 156     | 1.5 | 58 |                                 | CX600422 |
| WD repeat domain,<br>phosphoinositide<br>interacting 2 | WIP12  | 13 | F: GACTGTGGCAAGCAATCAGG<br>R: ACAGCAGCAACACAAATGGG          | 166     | 1.5 | 58 |                                 |          |

| Name                                                  | Symbol                     | Horse chr.            | Primers                                                  | Product size (bp) | MgCl <sub>2</sub> (mM) | T <sub>a</sub> | Reference                                                                                     | Accession No         |
|-------------------------------------------------------|----------------------------|-----------------------|----------------------------------------------------------|-------------------|------------------------|----------------|-----------------------------------------------------------------------------------------------|----------------------|
| sequence tagged site                                  | 14STS01                    | 14                    | F: AGAGAAAAGAGAGTGTGG<br>R: GAATCTGCATTGTAACAAGG         | 211               | 1.5                    | 50             | B. Brenig, personal commun.                                                                   | AY008801<br>AY008799 |
| sequence tagged site                                  | 14STS02<br>( <i>SOD2</i> ) | 14                    | F: GAAGTTGACTGCTGTATCGGCTG<br>R: GGTTAGGACAGGCAACAATCTGG | 101               | 1.5                    | 62             |                                                                                               | BI961637             |
| sequence tagged site                                  | 14STS03                    | 14                    | F: TTGCGAATCTCTTCAAGGGC<br>R: CTGTCATTGCTGTCAACCAC       | 500               | 1.5                    | 60             |                                                                                               |                      |
| adrenergic, beta-2-,<br>receptor, surface             | ADRB2                      | 14q14dist-<br>q16prox | F: CTCGTCCATCGTGTCTTCT<br>R: GGCTTTGTGTTCTTCAAGC         | 202               | 2.0                    | 58             | Caetano et al. 1999,<br>Chowdhary et al. 2003*                                                | AJ507700             |
| microsatellite                                        | AHT029                     | 14q13                 | F: ACTCATTTCATTCACAAATCCCC<br>R: AGAAAATTCCCTCCTGTCCC    | 270-292           | 2.0                    | 58             |                                                                                               | AJ507705             |
| microsatellite                                        | AHT083                     | 14                    | F: CTGACTATCCCCCAAACACA<br>R: ATGGCATTGCTTACATATCCTG     | 102-114           | 2.0                    | 58             |                                                                                               |                      |
| microsatellite                                        | AHT088                     | 14                    | F: TCACATGTGCCCTATGAATCC<br>R: CCTGTCAATGGAGGAATGGA      | 307-318           | 2.0                    | 58             | Swinburne et al. 2003<br>Swinburne et al. 2003<br>Perrocheau et al. 2006,<br>Goh et al. 2007* |                      |
| aldehyde<br>dehydrogenase 7<br>family, member A1      | ALDH7A1                    | 14q22.1               | F: GAAGATCCAAGTACTAGGAAGCT<br>R: ATCCACGTACTCTGAAGTTCT   | 1045              | 1.5                    | 58             |                                                                                               | DX010433             |
| annexin A6                                            | ANXA6                      | 14                    | F: TGAGAAAGTGCTCATTGAGATC<br>R: TCTTCTGGAAGTGCCAGAG      | 1032              | 1.5                    | 58             |                                                                                               |                      |
| arylsulfatase B                                       | ARSB                       | 14                    | F: GCATCAAATAATCTTGCCCTGT<br>R: GTATCAAATCCTCGGCGTGT     | 162               | 1.5                    | 55             | Perrocheau et al. 2006<br>Caetano et al. 1999,<br>Goh et al. 2007                             |                      |
| BCL2/adenovirus<br>E1B 19kDa<br>interacting protein 1 | BNIP1                      | 14                    | F: AATTTAAGTCCATGTCGGGG<br>R: CAATATAGAGGACTGTCGCAAGA    | 132               | 1.5                    | 58             |                                                                                               | AF115747             |
| C1q and tumor<br>necrosis factor<br>related protein 2 | C1QTNF2                    | 14                    | F: AGCTTTCTCGGTGGCAGTG<br>R: GCGTGATGTCGTAGGTGAAGTAG     | 158               | 1.5                    | 58             |                                                                                               |                      |
| calcium/calmodulin-                                   | CAMK4                      | 14q23-                | F: CCCTTTCTCAGGGCAGAAG                                   | 199               | 2.0                    | 58             | Caetano et                                                                                    |                      |

|                                                                                        |               |           |                                                       |         |     |    |                                        |          |
|----------------------------------------------------------------------------------------|---------------|-----------|-------------------------------------------------------|---------|-----|----|----------------------------------------|----------|
| dependent protein kinase IV                                                            |               | q24       | R: CCTTTGTGTGTCCAGCAATG                               |         |     |    | al. 1999, Chowdhary et al. 2003        |          |
| calnexin                                                                               | CANX          | 14        | F: AGATGGGTGCTATCCACCAG<br>R: GGAGAAAGCACTGAACAGCA    | 328     | 3.0 | 60 | Chowdhary et al. 2003                  |          |
| calpastatin                                                                            | CAST          | 14        | F: AAGACGGAAAGCCTGTGGA<br>R: TCACCAAGTTTCTCACGATCC    | 566     | 1.5 | 58 |                                        | BI961829 |
| coiled-coil domain containing 100                                                      | CCDC100       | 14        | F: CCTTCAGAAATCCAGACAGAG<br>R: CTTCTGCAAGAGCTTGCATA   | 681     | 1.5 | 58 | Goh et al. 2007                        | BI961752 |
| CD14 molecule                                                                          | CD14          | 14q16-q21 | F: CTCAACTTGTCTTCGCTGGG<br>R: CAGATTACTCACCACGGGCAG   | 132     | 1.5 | 58 | Goh et al. 2007                        |          |
| CD74 molecule, major histocompatibility complex, class II invariant chain chromodomain | CD74          | 14        | F: GCACAGATTAACAACGCAGG<br>R: GCAAATGTGTTGGACTTGGG    | 201     | 1.5 | 58 | Hopman et al. 1999                     | AF083445 |
| clathrin interactor 1                                                                  | CHD1          | 14        | F: GCAGATGGACCATAGAGCTT<br>R: TCCGACTACTCCAGGTATGC    | 135     | 1.5 | 58 | Swinburne et al. 2000                  |          |
| microsatellite                                                                         | CLINT1 (ENTH) | 14        | F: ATGGCCCCCTCTTGAAAT<br>R: GTTCCAGAAGTCATGGCTAAGT    | 140     | 1.5 | 58 | Goh et al. 2007                        |          |
| microsatellite                                                                         | COR002        | 14        | F: CTTGAGCACCCAGTAACACC<br>R: CCAGGAATCTTCTCTACCGA    | 224-232 | 2.0 | 58 | Hopman et al. 1999                     |          |
| microsatellite                                                                         | COR103/104    | 14q12-q13 | F: GGGAGTGTGTCCAGTTTGTC<br>R: CCABATAAAGCCCAAATCCT    | 167-169 | 2.0 | 58 | Swinburne et al. 2000                  |          |
| cofactor required for Sp1 transcriptional activation, subunit 9                        | CRSP9         | 14q15     | F: CATCCTATGCAGTTTGATCAC<br>R: TCTGTCCAGTACAATTGTTGC  | 400     | 1.5 | 58 |                                        |          |
| colony stimulating factor 1 receptor                                                   | CSF1R         | 14q15-q16 | F: GAGTTTATGAAGGAGGTG<br>R: GTGTGAGAGTGATGTTAG        | 174     | 1.5 | 50 | Caetano et al. 1999, Beck et al. 2005* |          |
| colony stimulating factor 2                                                            | CSF2          | 14        | F: CTGGGACCTTCTTGAGATGC<br>R: TCTGTCCTCCACCAGTAGGG    | 194     | 2.0 | 58 | Caetano et al. 1999                    | AF115750 |
| casein kinase 1, gamma 3                                                               | CSNK1G3       | 14        | F: GGCAACATATCTTCGTTATGTAA<br>R: CTGGTTTTTGGATTGTTGCA | 998     | 1.5 | 60 | Goh et al. 2007                        |          |
| chondroitin sulfate                                                                    | CSPG2         | 14q26-    | F: TTCGCTTACAAGAAAGGCCTGA                             | 282     | 3.0 | 58 | Chowdhary                              |          |

|                                                    |                           |                       |                                                                                                          |            |            |          |                                     |
|----------------------------------------------------|---------------------------|-----------------------|----------------------------------------------------------------------------------------------------------|------------|------------|----------|-------------------------------------|
| proteoglycan 2                                     |                           | q27                   | R: CAGCATTTCATACATGAACATTCAAAAC                                                                          |            |            |          | et al. 2003*                        |
| chondroitin sulfate synthase 3                     | CSS3                      | 14q22.1               | F: GGAAATCCTCCCACTGATGA<br>R: CACCTGCACCTAGAAGATCA                                                       | 112        | 1.5        | 58       |                                     |
| cytoplasmic FMR1 interacting protein 2             | CYFIP2                    | 14                    | F: TCTCTGGCTATCTTCGCTACAG<br>R: ACATGGTGCAGTAGTGCCTG                                                     | 156        | 1.5        | 58       |                                     |
| DEAD (Asp-Glu-Ala-Asp) box polypeptide 46          | DDX46                     | 14                    | F: TGATAAGAAGAAAGGTGAGCTG<br>R: GATACCCTGTAAGGGCTGTC                                                     | 775        | 4.0        | 55       |                                     |
| dimethylglycine dehydrogenase Dmx-like 1           | DMGDH<br>DMXL1            | 14q27<br>14           | F: AGTACACTGAGGCCAAAGCAA<br>R: AGAGCCCACTGACTCGTTGA<br>F: AGTAGCTTATAAGCAGCCTG<br>R: GATCCAATTCTACAGTCAG | 506<br>306 | 1.5<br>1.5 | 58<br>60 | Goh et al. 2007*<br>Goh et al. 2007 |
| dihydropyrimidinase-like 3                         | DPYSL3                    | 14q14dist-<br>q16prox | F: GTTTCCTCAAGCCTTCTCCCTTA<br>R: GCTACCACAGATCACAGGGAGATAG                                               | 114        | 4.0        | 60       | Chowdhary et al. 2003*              |
| dual specificity phosphatase 1                     | DUSP1                     | 14                    | F: CTGCGAACTGTCCCAACCAT<br>R: TTGGGGGAGATGATGCTTCT                                                       | 716        | 1.5        | 58       | Perrocheau et al. 2006              |
| early B-cell factor 1                              | EBF1                      | 14                    | F: GAGGTTGGATTCTGCTACAGAG<br>R: TTAACCAACACCCTGCACTT                                                     | 173        | 1.5        | 58       | Goh et al. 2007                     |
| ephrin-A5                                          | EFNA5                     | 14                    | F: ATGACACCGTCCATGAGTCAG<br>R: GGATGAGCAGTTAGGTGGATCT                                                    | 198        | 1.5        | 55       | Perrocheau et al. 2006              |
| fibrillin 2                                        | FBN2                      | 14                    | F: CTAACCGAGGGGATGTTCTT<br>R: CTTTCCTCCATGTCTAGAGCA                                                      | 1003       | 1.5        | 55       | Goh et al. 2007                     |
| F-box and leucine-rich repeat protein 17           | FBXL17                    | 14q24                 | F: TTGGGCGATACAGCATGACA<br>R: CATCAGCCCCAAATATCTCAGA                                                     | 119        | 1.5        | 58       | Goh et al. 2007*                    |
| fem-1 homolog c (C. elegans)                       | FEM1C                     | 14                    | F: TTCTTAAGCTGCATCCAAGG<br>R: TCCAGCAAGTCACTAGCAGTT                                                      | 292        | 1.5        | 58       | Goh et al. 2007                     |
| fibroblast growth factor 18                        | FGF18                     | 14                    | F: GCAAGGAGTGTGTGTTTCATC<br>R: GCTTCATGAAATGCACGTCC                                                      | 159        | 1.5        | 58       | Goh et al. 2007                     |
| gamma-aminobutyric acid (GABA) A receptor, gamma 2 | GABRG2                    | 14                    | F: CTACCATTGATATCCGCCCA<br>R: GAGGTAGGAGACCCAATAGACC                                                     | 263        | 1.5        | 58       |                                     |
| G protein-coupled receptor 98                      | GPR98<br>( <i>MASS1</i> ) | 14                    | F: TCAAAGCTAGTGATCATCCA<br>R: GGACACTGTTCTAAATTCCG                                                       | 1205       | 1.5        | 58       | Goh et al. 2007                     |
| glutamate receptor,                                | GRIA1                     | 14                    | F: TTGAGGGCAATGACCGTTAC                                                                                  | 114        | 1.5        | 58       | Perrocheau                          |

DX010470

DX010501

|                                                            |                   |       |                                                            |     |     |     |                                                          |          |
|------------------------------------------------------------|-------------------|-------|------------------------------------------------------------|-----|-----|-----|----------------------------------------------------------|----------|
| ionotropic, AMPA 1                                         |                   |       | R: GGGCTCCGTATTTTCCATCA                                    |     |     |     | et al. 2006                                              |          |
| hyaluronan and<br>proteoglycan link<br>protein 1           | HAPLN1<br>(CRTL1) | 14q27 | F: AAGCCAAGGTGTTCTCACAT<br>R: AGTCCTTCAATCACCTCACAC        | 298 | 1.5 | 58  | Milenkovic<br>et al. 2000,<br>Perocheau<br>et al. 2006   |          |
| histidyl-tRNA<br>synthetase                                | HARS              | 14    | F: TTGCTCGAGGACTGGACTACT<br>R: AGATCCGCTCTACTCCAATGC       | 198 | 1.5 | 55  | Perrocheau<br>et al. 2006                                | AF115752 |
| heparin-binding<br>EGF-like growth<br>factor               | HBEGF             | 14    | F: CCCAAGGTGCTGATGTCAAAG<br>R: GATTATCCTCTGCTGCGCTGA       | 235 | 1.5 | 58  |                                                          |          |
| hexosaminidase B<br>(beta polypeptide)                     | HEXB              | 14q27 | F: ACGCTGTGGCTTACCATTTT<br>R: TCATGAATGCTTCAGGTCTCC        | 137 | 3.0 | 60  | Caetano et<br>al 1999,<br>Chowdhary<br>et al 2003*       |          |
| hexokinase 3 (white<br>cell)                               | HK3               | 14q13 | F: AGTGGGGCTCCTTCAGTGAT<br>R: CACCAGCTCACCCAGGTACA         | 656 | 1.5 | 58  | Shubitowski<br>et al. 2001,<br>Goh et al.<br>2007*       | AY008793 |
| microsatellite                                             | HMB1              | 14    | F: GTGTGTATGCTTCCCAACCCTT<br>R: GTTATAAAGCACTATGATCTCA     | 118 | 58  | 2.0 | Goh et al.<br>2007                                       | Y07729   |
| 3-hydroxy-3-<br>methylglutaryl-<br>Coenzyme A<br>reductase | HMGCR             | 14q27 | F: TGTGGCCAGCACTAACAGAG<br>R: CCACCAAGCTGCCAGAGTAT         | 193 | 2.0 | 58  | Shubitowski<br>et al. 2001,<br>Chowdhary<br>et al. 2003* |          |
| hyaluronan-<br>mediated motility<br>receptor               | HMMR              | 14    | F: AAGTATTGAAAGGACCAGTATCC<br>R: CTTAACTTTTCTAGCTGAAGCAG   | 890 | 1.5 | 50  | Goh et al.<br>2007                                       |          |
| hydroxysteroid (17-<br>beta) dehydrogenase<br>4            | HSD17B4           | 14    | F: TGGGTCTTCTGGGCCTTTCA<br>R: TCAACCGTGATCCAGCTTGA         | 96  | 1.5 | 58  | Marklund et<br>al. 1994                                  | AF169295 |
| heat shock 70kDa<br>protein 4                              | HSPA4             | 14    | F: GAACAAGCAGAGTCTGACCA<br>R: TCAGGAAGCTTCTTGTCTGA         | 458 | 1.5 | 58  | Lindgren<br>2000                                         |          |
| microsatellite                                             | HTG11             | 14    | F: CAATGATGGTACTTTGCATATTAA<br>R: ATCGGCATGCACACTCATAGGTAG | 110 | 4.0 | 60  | Marklund et<br>al. 1994                                  |          |
| microsatellite                                             | HTG29             | 14    | F: CTATTTCCAGTCTTTGTGTGT<br>R: CCATAATAAAACATTAAAGATCAG    | 110 | 3.0 | 58  | Lindgren<br>2000                                         |          |
| 5-                                                         | HTR4              | 14    | F: GAGCATGCCCACCAGATC                                      | 139 | 1.5 | 58  | Goh et al.                                               | BI961569 |



|                                                        |          |               |                                                       |         |     |    |                                                    |          |
|--------------------------------------------------------|----------|---------------|-------------------------------------------------------|---------|-----|----|----------------------------------------------------|----------|
| hydroxytryptamine<br>(serotonin) receptor<br>4         |          |               | R: AACCCATGATGATGCACAGG                               |         |     |    | 2007                                               |          |
| interleukin 12B                                        | IL12B    | 14q14-<br>q15 | F: TCTTAGGCTCTGGCAAAACCT<br>R: TGTGAAGCAGCAGGTGAGAA   | 114     | 1.5 | 58 | Goh et al.<br>2007                                 |          |
| interferon regulatory<br>factor 1                      | IRF1     | 14            | F: GTGAATCCTGTTCCCAAAGA<br>R: GCTTAGCGGAGACGTTAGTG    | 236     | 1.5 | 58 | Goh et al.<br>2007                                 |          |
| jumonji domain<br>containing 1B                        | JMJD1B   | 14q21         | F: TATGGCACATCTATGCAGCC<br>R: GAATTGGGTCATGATCAGGG    | 388     | 1.5 | 58 |                                                    |          |
| KIAA0372                                               | KIAA0372 | 14            | F: ATTTGAAAGCTGGTCAGCAT<br>R: CACTGTATATGGATTCTGGGTTC | 1077    | 1.5 | 58 | Goh et al.<br>2007                                 |          |
| kinesin family<br>member 3A                            | KIF3A    | 14q21         | F: TTGCATATGGACAAACCGGA<br>R: AACCTTTGTGTCTGATCCTTGC  | 358     | 1.5 | 58 | Goh et al.<br>2007*                                |          |
| La ribonucleoprotein<br>domain family,<br>member 1     | LARP1    | 14            | F: ATGAGCAAGAGGAAGTGGAT<br>R: GCATGTAATGTGGTGTCTGG    | 162     | 1.5 | 58 | Coogle et al.<br>1997                              | AF075645 |
| lymphocyte<br>cytosolic protein 2                      | LCP2     | 14            | F: CCTTGCCACTTCCAAACAAA<br>R: TGGTCGGGTAATATAAGAAACG  | 702     | 1.5 | 58 | Coogle et al.<br>1997                              | AF075649 |
| microsatellite                                         | LEX043   | 14q13-<br>q14 | F: CATTAAAGCAACAAAAGCATC<br>R: GGAAAAGCATGACAAGACACT  | 238-246 | 3.0 | 60 | Coogle et al.<br>1997,<br>Chowdhary<br>et al. 2003 | AF213364 |
| microsatellite                                         | LEX047   | 14            | F: TATAATAATGTGTCTTGGTGTG<br>R: TGTTAATCAGGGTTCTCC    | 237-245 | 3.0 | 58 | Coogle et al.<br>1997                              |          |
| microsatellite                                         | LEX078   | 14q27         | F: TGTGCGCATTTAACCAGTGT<br>R: TTCATGCACTCCACTTCAGC    | 230     | 1.5 | 60 | Bailey et al.<br>2000, Lear<br>et al. 2000*        |          |
| lectin, mannose-<br>binding 2                          | LMAN2    | 14            | F: ATGACACCTTCCTGGCTGTG<br>R: AGGCTCCAAAGTAGTAGCCG    | 247     | 1.5 | 58 | Goh et al.<br>2007                                 |          |
| methionine<br>adenosyltransferase<br>II, beta          | MAT2B    | 14q14         | F: TTCATTGGTCTGGCAACGAA<br>R: TCAAGCTGAGCATTTCTTGGA   | 663     | 1.5 | 58 | Goh et al.<br>2007*                                |          |
| methylcrotonoyl-<br>Coenzyme A<br>carboxylase 2 (beta) | MCCC2    | 14            | F: TAGGAAGGTTGTGAGGAATCTA<br>R: GCACCAACTATTCCATACAAT | 216     | 1.5 | 50 | Goh et al.<br>2007                                 |          |
| MADS box<br>transcription                              | MEF2C    | 14            | F: CCAACTTTGAGATGCCAGTCT<br>R: TTACCTGCACTTGGAGGTCTG  | 169     | 1.5 | 58 | Goh et al.<br>2007                                 |          |

|                                                                                |        |               |                                                               |      |     |     |                                                   |                                    |
|--------------------------------------------------------------------------------|--------|---------------|---------------------------------------------------------------|------|-----|-----|---------------------------------------------------|------------------------------------|
| enhancer factor 2,<br>polypeptide C                                            | MEGF10 | 14            | F: CCATTGCAGGCATCATCATT<br>R: GCAGGGGTGTAGGTAACCTGCT          | 121  | 1.5 | 58  | Goh et al.<br>2007                                |                                    |
| multiple EGF-like-<br>domains 10                                               | MFAP3  | 14q16         | F: AAACCATGGAGTTTGCTCGT<br>R: CATCTGAATCTCCTCCTGGT            | 234  | 1.5 | 58  | Goh et al.<br>2007*                               |                                    |
| microfibrillar-<br>associated protein 3                                        | MYOT   | 14            | F: ATGAAGCTGGAGTGACCACA<br>R: AAAGTTGGTCGGACACGTAA            | 315  | 1.5 | 50  | Bryan et al.<br>manu                              |                                    |
| myotilin                                                                       | NR2F1  | 14            | F: CCTGTCCGGCTACATCTCG<br>R: CTTCTCCACCTGCTCCTGG              | 373  | 1.5 | 62  | Goh et al.<br>2007                                |                                    |
| nuclear receptor<br>subfamily 2, group<br>F, member 1                          | NR3C1  | 14q16-<br>q21 | F: GAAAGCATTGCAAACCTCAA<br>R: TCTGTTTTCACTTGGGGCA             | ~100 | 58  | 1.5 | Goh et al.<br>2007                                | AY392091,<br>AY392092,<br>AY394747 |
| nuclear receptor<br>subfamily 3, group<br>C, member 1                          | PAM    | 14            | F: TACCAAGAATGCCAGGTTCC<br>R: CGTGATGGAAGAAGAGGACTG           | ~200 | 62  | 1.5 | Shubitowski<br>et al. 2001,<br>Goh et al.<br>2007 | AY008799                           |
| peptidylglycine<br>alpha-amidating<br>monooxygenase                            | PCSK1  | 14q26         | F: GGTTGTCTGGACCTCTGAGTAT<br>R: AACTGCTCCAGGTCCTG             | 153  | 1.5 | 58  | Goh et al.<br>2007*                               |                                    |
| proprotein<br>convertase<br>subtilisin/kexin type<br>1                         | PDE6A  | 14            | F: GGGCCAAGGTCATCTCAGAC<br>R: AGCCTGCAGATTCTCCTGAA            | 137  | 2.0 | 58  | Shubitowski<br>et al. 2001                        |                                    |
| phosphodiesterase<br>6A, cGMP-specific,<br>rod, alpha                          | PJA2   | 14            | F: CTTCCAGAGACCCTTGTCTT<br>R: GCCAAATTGAGACACAAGGT            | 541  | 1.5 | 54  |                                                   |                                    |
| praja 2, RING-H2<br>motif containing                                           | PPIC   | 14            | F: TTGGAGACAAAGATGTTGGC<br>R: CCTTGATGACACGATGAAACT           | 577  | 1.5 | 50  | Goh et al.<br>2007                                |                                    |
| peptidylprolyl<br>isomerase C<br>(cyclophilin C)                               | PPP2CA | 14            | F:<br>GAGCACAGTACTCCAGAGTGTGAGAG<br>R: GCTCCAATGATTGTTTGCTGCT | 340  | 3.0 | 58  | Perrocheau<br>et al. 2006                         | DX010568                           |
| protein phosphatase<br>2 (formerly 2A),<br>catalytic subunit,<br>alpha isoform | RARS   | 14q14         | F: CCATAGTAAAATCAGATGGAGGT<br>R: CATTGTCCACAACATAGATAATCA     | 111  | 1.5 | 58  | Goh et al.<br>2007*                               |                                    |
| arginyl-tRNA<br>synthetase                                                     | RASA1  | 14q12         | F: TGCTGGAAGTGTGAAAGAAAA                                      | 210  | 1.5 | 55  | Perrocheau                                        |                                    |
| RAS p21 protein                                                                |        |               |                                                               |      |     |     |                                                   |                                    |

|                                                                                 |                      |             |                                                         |     |     |    |                                                |          |
|---------------------------------------------------------------------------------|----------------------|-------------|---------------------------------------------------------|-----|-----|----|------------------------------------------------|----------|
| activator                                                                       |                      |             | R: ATGGTTGAATGGGTAACATGC                                |     |     |    | et al. 2006                                    |          |
| Rho-guanine nucleotide exchange factor                                          | RGNEF                | 14          | F: TAATGCAAACAGAGATGCATC<br>R: AGAAGAAATGCCTGTGGATT     | 156 | 1.5 | 50 | Goh et al. 2007                                | BI961565 |
| Equine pseudogene                                                               | RPL7ps               | 14          | F: AAGCGAATTGCCCTGACAGA<br>R: CCACAGGAAGTTGTTTGCTTCT    | 135 | 1.5 | 58 |                                                |          |
| ribosomal protein S14                                                           | RPS14<br>(LOC153195) | 14          | F: CAGGTGGCTGAAGGAGAAAATG<br>R: GAGTTTGATGTGGAGGGCAGTG  | 856 | 1.5 | 65 | Goh et al. 2007                                | BI961565 |
| ribosomal protein S23                                                           | RPS23                | 14          | F: CGCTTTAAGGTTGTCAAAGTAGC<br>R: TTACTACCACGCTTTCACCATC | 105 | 1.5 | 59 |                                                |          |
| secretory carrier membrane protein 1                                            | SCAMP1               | 14          | F: ACATCCAGCTTATACACAGATTGC<br>R: GTTCTTCTGGCGCTTAAGA   | 996 | 1.5 | 58 |                                                |          |
| sema domain, transmembrane domain (TM), and cytoplasmic domain, (semaphorin) 6A | SEMA6A               | 14          | F: TGGAGATGAACACATCGCGT<br>R: GCTCGGAGCGAACTGGTACA      | 186 | 1.5 | 50 | Goh et al. 2007                                |          |
| SH3 domain containing ring finger 2                                             | SH3RF2               | 14          | F: CTCCGGGAAGCCTGAACAG<br>R: CCTCCGGAGGTCTGTCTGC        | 133 | 1.5 | 58 | Perrocheau et al. 2006                         | DX010583 |
| solute carrier family 25, member 46                                             | SLC25A46             | 14          | F: TCATTACATCATCAGCTCAG<br>R: TTGGTAATCTGTAAAACAGC      | 399 | 1.5 | 58 |                                                |          |
| solute carrier family 26 (sulfate transporter), member 2                        | SLC26A2              | 14q15       | F: AGGCAGACATGGACTCAAAGA<br>R: CCAGATGTGGAGGATTAGCAG    | 200 | 1.5 | 55 | Brenig et al. 2004*,<br>Perrocheau et al. 2006 |          |
| SMAD family member 5                                                            | SMAD5                | 14q21       | F: CATCTGTACTATGTTGGTGGA<br>R: GCTCATATACTGCCTCAAAC     | 214 | 1.5 | 58 | Caetano et al. 1999,<br>Goh et al. 2007*       | AF130781 |
| synuclein, alpha interacting protein                                            | SNCAIP               | 14          | F: ACAGCTGATGCAGAGGTCAC<br>R: GCTTTCTGCGCTGTCCATAC      | 145 | 1.5 | 58 | Goh et al. 2007                                | AY008814 |
| equine pseudogene                                                               | SOD2ps               | 14q22.3-q23 | F: GACAAACCTGAGCCCCAAT<br>R: CTTATTGAAGCCGAGCCAAC       | 148 | 2.0 | 58 | Caetano et al. 1999,<br>Chowdhary et al. 2003* | AF115756 |
| SRY (sex)                                                                       | SOX30                | 14          | F: GTTTGGGCAAGGATCCAC                                   | 100 | 2.0 | 62 | Goh et al.                                     |          |

|                                                                         |         |       |                                                       |         |     |    |                                                     |          |
|-------------------------------------------------------------------------|---------|-------|-------------------------------------------------------|---------|-----|----|-----------------------------------------------------|----------|
| determining region<br>Y)-box 30                                         |         |       | R: AGTTTGTTCCTACTCTAACCCGA                            |         |     |    | 2007                                                |          |
| secreted protein,<br>acidic, cysteine-rich                              | SPARC   | 14q21 | F: ACCCACTAACGGTCCCATT<br>R: CTGGCAGCCAATACCCTAAA     | 199     | 2.0 | 58 | Caetano et<br>al. 1999,<br>Chowdhary<br>et al. 2003 |          |
| sequestosome 1                                                          | SQSTM1  | 14    | F: AGGATGACATCTTCCGCATT<br>R: AGACACTGCACTTGTAGCGG    | 966     | 1.5 | 58 | Perrocheau<br>et al. 2005                           | AY817486 |
| ST8 alpha-N-acetyl-<br>neuraminide alpha-<br>2,8-sialyltransferase<br>4 | ST8SIA4 | 14q25 | F: AGTTTGCTGCAGATGTGGGA<br>R: CCTCCTTTGACCATGAAAGCA   | 172     | 1.5 | 58 |                                                     |          |
| serine/threonine<br>kinase 10                                           | STK10   | 14q13 | F: AGATGCAGCGCTACAACCAG<br>R: CTTGATCTTCTCACGCTGCTC   | 176     | 1.5 | 55 | Perrocheau<br>et al. 2005*                          |          |
| synaptic vesicle<br>glycoprotein 2C                                     | SV2C    | 14    | F: CAAGACGGGATGTCAGATTACC<br>R: GAAACAGCTGATCCCCGAA   | 634     | 1.5 | 58 | Goh et al.<br>2007                                  |          |
| TAF7 RNA                                                                | TAF7    | 14q21 | F: AGATGCTTGTCTCCACAGTT<br>R: CTCGTCACTGTTCTAGTGAGTCA | 377     | 1.5 | 58 | Goh et al.<br>2007*                                 | AB104254 |
| polymerase II                                                           |         |       |                                                       |         |     |    |                                                     |          |
| thrombospondin 4                                                        | THBS4   | 14    | F: ACATCGACAGTTACCCCGAC<br>R: GCCATCTCTGTCTGCATCTTCT  | 342     | 1.5 | 60 | Tozaki et al.<br>2004                               | AB104271 |
| microsatellite                                                          | TKY267  | 14    | F: CCACTGCCAAATGAAACAAA<br>R: CCACACATTTTCAGGAAAGAA   | 97-113  | 1.5 | 50 | Kakoi et al.<br>2000                                |          |
| microsatellite                                                          | TKY317  | 14    | F: CTTGAGGAACATGTCATAGC<br>R: AATGCTCTCACAATTTACCC    | 141-155 | 1.5 | 58 |                                                     | AB217464 |
| microsatellite                                                          | TKY329  | 14    | F: GCAGATTATTCCACATACCC<br>R: CCTAACTGTTTATGGGTGAG    | 127-153 | 1.5 | 58 | Tozaki et al,<br>2001                               |          |
| microsatellite                                                          | TKY376  | 14    | F: ATGCTTCACAGGGTTATCTC<br>R: CTGGTGAGATTTGCAGTCAG    | 192-214 | 1.5 | 58 | Tozaki et al,<br>2001                               |          |
| microsatellite                                                          | TKY390  | 14    | F: CCCTTTGTTGGGTAGAATAG<br>R: TTATGCCTACCTCATAGGAC    | 220-224 | 2.0 | 50 |                                                     | AB103653 |
| microsatellite                                                          | TKY395  | 14    | F: ATGTCCCTTCTCAGCTTTG<br>R: CTGGCGTCATTTACACATC      | 193-207 | 1.5 | 52 |                                                     | AB103656 |
| microsatellite                                                          | TKY435  | 14    | F: GTTCGTCTGTTTCTAGCCTC<br>R: TATCTCCACATGGTACTCTC    | 205     | 2.0 | 58 |                                                     | AB103658 |
| microsatellite                                                          | TKY438  | 14    | F: TCCCCGAGAAAGGTGTGAGAC<br>R: AAAACTGTACAGGGCAGGT    | 277-295 | 1.5 | 55 | Tozaki et al.<br>2004                               | AB103691 |
| microsatellite                                                          | TKY440  | 14    | F: TTCCTATCTTCGAGGCCAGA                               | 221-231 | 1.5 | 58 | Tozaki et al.                                       | AB103709 |

|                |         |    |                                                      |         |     |    |                       |          |
|----------------|---------|----|------------------------------------------------------|---------|-----|----|-----------------------|----------|
| microsatellite | TKY473  | 14 | R: CTTGCCAACACCCATTCTCT<br>F: AAAGAGGCAATGTCAGTCAG   | 243     | 2.0 | 58 | 2004                  | AB103745 |
| microsatellite | TKY491  | 14 | R: AGAGGTTGGAGGGATAAATG<br>F: CCTCTTGGGACAGAGGACAG   | 256-268 | 1.5 | 55 | Tozaki et al.<br>2004 |          |
| microsatellite | TKY527  | 14 | R: TCTCTCAGGAGCCTGTGTTG<br>F: AGGGGTGTCAAATGCAGTC    | 149     | 2.0 | 58 | Tozaki et al.<br>2004 |          |
| microsatellite | TKY584  | 14 | R: ACAATTCCTTTTCACTGGGTG<br>F: AGCCATTAGCCAAGGATGC   | 134-136 | 1.5 | 58 | Tozaki et al.<br>2004 |          |
| microsatellite | TKY636  | 14 | R: GACCAGGGATGTGGGTACAG<br>F: TAATCGAGGGGGCCTTAATC   | 188-216 | 1.5 | 58 | Tozaki et al.<br>2004 | AB103874 |
| microsatellite | TKY647  | 14 | R: CGCTCTCTCTAAAGGCTCCA<br>F: CTGGGAAGCAGCAGGAATAA   | 96-98   | 1.5 | 58 | Tozaki et al.<br>2004 |          |
| microsatellite | TKY656  | 14 | R: GCTAATGGAAAGGCCACAGA<br>F: TTGTCATCACAAATGGCAGG   | 131     | 2.0 | 58 |                       | AB104005 |
| microsatellite | TKY749  | 14 | R: CGACGGATGAATAGATAAAG<br>F: TGGGTTCTGTCTTCTCTCTGT  | 222-228 | 1.5 | 58 | Tozaki et al.<br>2004 | AB104059 |
| microsatellite | TKY787  | 14 | R: CCAGGCTCGAGAGACTTGTT<br>F: AAAACAGTCCCTACCTTGAG   | 234     | 2.0 | 58 |                       | AB104062 |
| microsatellite | TKY841  | 14 | R: TGTGTGTGATTTAGCTAGCA<br>F: ATCACTGATAGTCACCAAAGTG | 148     | 2.0 | 58 |                       | AB104100 |
| microsatellite | TKY844  | 14 | R: ATGTGGATTAAGATAGAGCTGC<br>F: TCTACCATAGCTCTACAGGA | 153     | 2.0 | 58 | Tozaki et al.<br>2004 | AB104148 |
| microsatellite | TKY930  | 14 | R: GAGACAGAACCTGCTACCTT<br>F: TTTGGACTTGCTTGGCCAG    | 147     | 2.0 | 58 | Tozaki et al.<br>2004 | AB104189 |
| microsatellite | TKY948  | 14 | R: AGAGAAGCAAAACCAGTAGG<br>F: GATCGTCCCTCCACCTTG     | 102     | 2.0 | 58 |                       |          |
| microsatellite | TKY971  | 14 | R: CCTGCCAAACATCAGTATTC<br>F: GTCGACAGAGCCAGGAAG     | 86      | 2.0 | 58 |                       |          |
| microsatellite | TKY1036 | 14 | R: GGGACTGTCAATTAACCCTC<br>F: TTCCCTGTTTAGCTCTTAAAC  | 188     | 2.0 | 58 |                       | AB104332 |
| microsatellite | TKY1053 | 14 | R: GCAGTAAAGATGGTATCTCC<br>F: ATACTGGCTTTACGTCACAG   | 92      | 2.0 | 58 | Tozaki et al.<br>2004 | AB104363 |
| microsatellite | TKY1114 | 14 | R: ATCACCACCAGAGTTAATGG<br>F: GTTTATTAGGTCAGTCTTCC   | 247     | 2.0 | 58 |                       | AB104369 |
| microsatellite | TKY1145 | 14 | R: GCAAGCTCATTGCCAAGAC<br>F: TGGCATCCACATAAAACAG     | 257     | 2.0 | 58 |                       | AB104374 |
|                |         |    | R: ACTGATTTGCACAGAAGGAG                              |         |     |    |                       |          |

|                                           |                           |                       |                                                       |         |     |    |                                                       |          |
|-------------------------------------------|---------------------------|-----------------------|-------------------------------------------------------|---------|-----|----|-------------------------------------------------------|----------|
| microsatellite                            | TKY1151                   | 14                    | F: TCACGCAATTCCAATCTTTGG<br>R: TGCCTACCAATTTGTAGGTG   | 259     | 2.0 | 58 |                                                       | AB215620 |
| microsatellite                            | TKY1156                   | 14                    | F: AGTGACAATCTTCCTCAAGC<br>R: ATGGTTGAGAGGAAACTTGC    | 197     | 2.0 | 58 |                                                       | AB215933 |
| microsatellite                            | TKY1677                   | 14                    | F: TGACCCAGATGAATCTCTTA<br>R: CATTCACTGCCGTCTAAGTA    | 174     | 1.5 | 58 |                                                       | AB216467 |
| microsatellite                            | TKY1990                   | 14                    | F: ACACTTTGTAGGGCACACT<br>R: ATCAGTACAGTGGGAAGTTG     | 245     | 1.5 | 58 | Kakoi et al,<br>2000                                  |          |
| microsatellite                            | TKY2524                   | 14                    | F: TCCATGCGAATTAGTCCATT<br>R: TTTGTTTACCCACACCTTCC    | 233     | 1.5 | 58 | Tozaki et al,<br>2007                                 | AB216996 |
| microsatellite                            | TKY3053                   | 14                    | F: TCCTTTTCAGCCATTTGTTGA<br>R: TCTAACCAGAAAGTGAAGC    | 99      | 1.5 | 58 | Tozaki et al,<br>2007                                 |          |
| microsatellite                            | TKY3521                   | 14                    | F: TGGTACTCCTTTTGCTTCCA<br>R: CGCACCAACTTAACCACTCT    | 238     | 1.5 | 58 | Tozaki et al,<br>2007                                 |          |
| transmembrane<br>protein 161B             | TMEM161B                  | 14                    | F: GTTTACTCTGAATTACCATCAGC<br>R: ATGCCACAGTCAGATACTGG | 202     | 1.5 | 50 |                                                       |          |
| transportin 1                             | TNPO1<br>( <i>KPNB2</i> ) | 14                    | F: GCAACATTGAACAGCTGGTA<br>R: CATGCTGAAAGCAAGCTTTT    | 215     | 1.5 | 60 | Goh et al.<br>2007                                    |          |
| tripartite motif-<br>containing 36        | TRIM36                    | 14                    | F: AGAATATCGAAAGGGAGCTC<br>R: TTGATTGGAGTTGTCTGATC    | 161     | 1.5 | 50 | Goh et al.<br>2007                                    |          |
| sequence tagged site                      | TUDPEc277                 | 14                    | F: AAGAAAGAGGGTCAGAGGGC<br>R: AGGAAAGCTGATTTTTCATGGTG | 388     | 1.5 | 60 |                                                       | BI395242 |
| ubiquitin-<br>conjugating enzyme<br>E2D 2 | UBE2D2                    | 14                    | F: TTTACCCCTTACATCCAGATAGA<br>R: TGTGACAAGCCAATTCTCCA | 545     | 1.5 | 58 | Goh et al.<br>2007                                    | AF195134 |
| microsatellite                            | UM010                     | 14q14                 | F: TACAGCCATTGGAAATCTAC<br>R: CACCATTACATTTTCCCAG     | 110-120 | 3.0 | 58 | Meyer et al.<br>1997,<br>Chowdhary<br>et al. 2003*    |          |
| microsatellite                            | UM016                     | 14                    | F: TTCCTCCACTATCTCTCCCTC<br>R: GCAAAAATGCACAGCCTC     | 200     | 2.0 | 58 | Meyer et al.<br>1997                                  |          |
| microsatellite                            | UM032                     | 14q14dist-<br>q16prox | F: AAATGGTCAGCCTCTCCTC<br>R: TGTCTCTCTAGTCCCACTCCTC   | 141-149 | 2.0 | 58 | Swinburne<br>et al. 2000,<br>Chowdhary<br>et al. 2003 | AF536266 |
| microsatellite                            | UMNe125                   | 14                    | F: TGGGTCCTGAGACCATAAGC<br>R: TCCTCCCTACCTCCTCACTG    | 143     | 1.5 | 58 | Wagner et<br>al. 2004a                                | AF536277 |

|                                      |         |    |                                                           |     |     |    |                                 |          |
|--------------------------------------|---------|----|-----------------------------------------------------------|-----|-----|----|---------------------------------|----------|
| microsatellite                       | UMNe154 | 14 | F: CAGCAATCAAATTGACCAGC<br>R: TGGCTCCTCTCAAGTTGAGC        | 143 | 1.5 | 58 | Mickelson<br>et al. 2003        | AF536281 |
| microsatellite                       | UMNe187 | 14 | F: GCTCCCTCCGCACTACTTC<br>R: CTCCTATTCCAGACAGTGGAGG       | 108 | 2.0 | 58 | Mickelson<br>et al. 2003        |          |
| microsatellite                       | UMNe194 | 14 | F: ACTGGATGCCTGGAATTGAG<br>R: GAATAAGTTGGGACCCCTCC        | 120 | 2.0 | 58 | Mickelson<br>et al. 2003        | AF536306 |
| microsatellite                       | UMNe227 | 14 | F: ATAATTTCCCTTGCCAACACC<br>R: CTGTAGACCCAAAGGAAGATGG     | 186 | 2.0 | 58 | Wagner et<br>al. 2004a          | AF536309 |
| microsatellite                       | UMNe234 | 14 | F: TATGCACAATTAAAGGCCTGG<br>R: AATGACCCAGAGACAGGCTG       | 189 | 2.0 | 58 | Mickelson<br>et al. 2003        | AF536314 |
| microsatellite                       | UMNe239 | 14 | F: ATCAAAGGTTTCATCAGTTGGTG<br>R: TTCTTTCACTCAGCGTGGTG     | 171 | 2.0 | 58 | Mickelson<br>et al. 2003        |          |
| microsatellite                       | UMNe244 | 14 | F: TCCAAGGGTTTGTCCAAAAG<br>R: TCTCTTGGTTGAAAATGGGG        | 173 | 3.0 | 58 | Mickelson<br>et al. 2003        |          |
| microsatellite                       | UMNe315 | 14 | F: CAGGCAATAAAAAATCTCCAACC<br>R: TCACAGACGCTCCATAAACG     | 129 | 2.0 | 58 | Goh et al.<br>2007              |          |
| microsatellite                       | UMNe321 | 14 | F: ATCATATGGTATTTGTCTTCCTCTG<br>R: CTCAAAAAGATAAATGCACCCC | 178 | 1.5 | 62 | Goh et al.<br>2007              |          |
| microsatellite                       | UMNe406 | 14 | F: GGCAACAGATGTTAGCTCAGG<br>R: ATGTGCTCTCGAGATGAAAATT     | 96  | 2.0 | 55 | Wagner et<br>al. 2004b          |          |
| microsatellite                       | UMNe458 | 14 | F: GACCTACATTTCCTTGTCAGCC<br>R: TTA AAAACAAAACCCACTACCCTG | 171 | 1.5 | 60 |                                 | AY731399 |
| microsatellite                       | UMNe460 | 14 | F: CCATCAGTGATGTTGCAAATG<br>R: AGTGTCCATCAATGGATGAATG     | 153 | 1.5 | 62 | Wagner et<br>al. 2004b          | AY464502 |
| microsatellite                       | UMNe474 | 14 | F: CCAAAGGGTGGAATTGATG<br>R: TTTTGCCTCTCTCACCATCC         | 300 | 1.5 | 58 | Mickelson<br>et al. 2004        | AY731412 |
| microsatellite                       | UMNe489 | 14 | F: ACACAAACCTAGCACGACTCG<br>R: TTGTTATAGCAGCCCAAATGG      | 400 | 1.5 | 60 | Wagner et<br>al. 2004b          | AY735281 |
| microsatellite                       | UMNe550 | 14 | F: GAGTATCACTGCTCCCAGGC<br>R: TTTTGGGGACTGTCATTTAACC      | 122 | 1.5 | 55 | Mickelson<br>et al. 2004        | AY735283 |
| microsatellite                       | UMNe581 | 14 | F: TCATCAAGCCATGTTTTAGTG<br>R: TTGCTGACAGTCAGGGTGAG       | 150 | 1.5 | 58 | Wagner et<br>al. 2004c          | CX593585 |
| microsatellite                       | UMNe584 | 14 | F: AAATTTGTCCCATGTAATTCCC<br>R: TCACTGTTGGGAAAGGAACC      | 100 | 1.5 | 58 | Wagner et<br>al. 2004c          |          |
| voltage-dependent<br>anion channel 1 | VDAC1   | 14 | F: CCCAGTCCATCACCTCTTTTAG<br>R: AGGTCCTGAATTATTGGCTTCA    | 104 | 1.5 | 59 | van<br>Haeringen<br>et al. 1998 |          |

|                                        |                               |       |                                                           |       |     |       |                               |          |
|----------------------------------------|-------------------------------|-------|-----------------------------------------------------------|-------|-----|-------|-------------------------------|----------|
| microsatellite                         | VHL162                        | 14    | F: GCTACTCTTTTACTCCTACTGC<br>R: CTCTCGATGTAAGTGCTTGTGC    | ~100  | 1.5 | 62.0  | van Haeringen et al. 1998     | Y08451   |
| microsatellite                         | VHL204                        | 14    | F: ACTGAAGTTGAGAATCATTAAATGG<br>R: ACTTCCTCGACATCCTTCCCT  | ~100  | 1.5 | 62.0  | van Haeringen et al. 1998     |          |
| microsatellite                         | VHL209                        | 14    | F: TCTTACATCCTTCCATTACAATA<br>R: TGATACATATGTACGTGAAAGGAT | 84-98 | 3.0 | 60    | van Haeringen et al. 1998     |          |
| Yip1 domain family, member 5           | YIPF5                         | 14q21 | F: GGAATCATTCTCACTGCTGG<br>R: TTAGGGCAAAGACTCCGTAT        | 139   | 1.5 | 58    | Goh et al. 2007*              | CT009210 |
| YTH domain containing 2                | YTHDC2                        | 14    | F: GACAGAAGTGGCATAGCTTA<br>R: GCTCTTCTGAAGACATAGGC        | 180   | 1.5 | 58    | Goh et al. 2007               |          |
| zinc finger, FYVE domain containing 16 | ZFYVE16                       | 14    | F: TAACAAGTATCAGAGGCCGA<br>R: CCCATTTCCATATGAATCAAC       | 819   | 1.5 | 55    | Goh et al. 2007               |          |
| zinc finger protein 608                | ZNF608<br>( <i>KIAA1281</i> ) | 14    | F: AAGGACCATCTCAGCAAGAAT<br>R: AAAGTGCTGCACTCCATCCT       | 164   | 1.5 | 55    | Goh et al. 2007               |          |
| microsatellite                         | ZuBeEq13                      | 14    | F: TTGGGTCTAGGAATCTCTGACT<br>R: ATCAATGTTTTTCCACCCTCTA    | 246   | 1.5 | 63-55 | Klukowska-Rotzler et al. 2006 |          |



| Name                                                                             | Symbol         | Horse chr.    | Primers                                                | Product size (bp) | MgCl <sub>2</sub> (mM) | T <sub>a</sub> | Reference           | Accession No |
|----------------------------------------------------------------------------------|----------------|---------------|--------------------------------------------------------|-------------------|------------------------|----------------|---------------------|--------------|
| microsatellite                                                                   | 15CA001        | 15            | F: CTCTGTGCCAGACCCTGTTC<br>R: GGTCTGCTCGAACGTCATTT     | 139-143           | 1.5                    | 58             | Penedo et al. 2005  | BI395220     |
| sequenced tagged site                                                            | 15STS01        | 15            | F: GATTTCTGACTGGACCGAG<br>R: GAAGTTCAAGGGCGACAG        | 352               | 2.0                    | 58             |                     |              |
| sequenced tagged site                                                            | 15STS02        | <b>15q13</b>  | F: TCAAGTGCATCATCCTCACC<br>R: CCTGAGGCTCACACTCTTCC     | 567               | 1.5                    | 58             |                     |              |
| ARPI actin-related protein 1 homolog B                                           | ACTR1B         | 15            | F: AGGCAGCAGAGGTGTTTTT<br>R: GAAAGTCGACTCCCTCTTGC      | 619               | 1.5                    | 58             | Wagner et al. 2006  | AW260913     |
| acylphosphatase 2, muscle type                                                   | ACYP2          | 15            | F: ACACAGAAGATGAGGCTAGG<br>R: TGGAATTGACTTTCTCTTCAGG   | 114               | 1.5                    | 60             | Wagner et al. 2006  |              |
| adducin 2 (beta)                                                                 | ADD2           | 15            | F: ACAAGGGGAACAGAACAAAC<br>R: GCGAGCAAGAAGCAGAAATC     | 220               | 1.5                    | 58             | Wagner et al. 2006  |              |
| AT rich interactive domain 5A                                                    | ARID5A         | 15            | F: GGAGGGCACTGTCGAAAGA<br>R: CCCACTGAACTTTGCCAGC       | 170               | 2.0                    | 58             |                     | BI961816     |
| microsatellite                                                                   | ASB02          | 15q21.3-q23   | F: CCTTCCGTAGTTTAAGCTTCTG<br>R: CACAAGTCTGTTCTCTGATAGG | 182               | 2.0                    | 58             | Breen et al. 1997*  | X95317       |
| microsatellite                                                                   | ASB15          | 15q21.1-q21.3 | F: GTCCCAAAGGGACTCAGGAAGG<br>R: TGGATGCCAGTGCATAGACAG  | 144               | 3.0                    | 58             | Breen et al. 1997*  | X95330       |
| microsatellite                                                                   | ASB19          | 15q21.3-q23   | F: GAGTTGGAGCTCAAGTCTGTC<br>R: GTTTAGCAACTACAGCGTAGG   | 193               | 2.0                    | 58             | Breen et al. 1997*  | X95334       |
| microsatellite                                                                   | B-8            | 15q14-q21.3   | F: TCCTCAGTCCTTTCTCATGC<br>R: AGCTGAAGGCAATCTGTACC     | 80-102            | 2.0                    | 58             | Marti et al. 1998*  | Y10240       |
| carbamoyl-phosphate synthetase 2, aspartate transcarbamylase, and dihydroorotase | CAD            | 15q25         | F: ATGATGGTACAGAAGGAGC<br>R: TGTGCTCACCTCGTAGAA        | 650               | 1.5                    | 60             | Godard et al. 1998* |              |
| capping protein (actin filament), gelsolin-like                                  | CAPG           | 15            | F: CATCTCCCGCATGCAGTA<br>R: TTGAAGATGGGACTCTCGC        | 655               | 2.0                    | 58             | Wagner et al. 2006  | BI961838     |
| CCAAT/enhancer binding protein zeta                                              | CEBPZ          | 15            | F: TCTTGGCTCAAACTCAACTC<br>R: TGTATTCAACTATGTGAGGCA    | 146               | 1.5                    | 58             | Wagner et al. 2006  | DQ001079     |
| BAC end sequence                                                                 | CH241-100A9_T7 | 15            | F: AGTGACAAACGCTTTTCCAG<br>R: CTGACAAGGGGGGTATTGTG     | 647               | 1.5                    | 58             | Wagner et al. 2006  | AJ542706     |

|                                                            |                 |       |                                                       |         |     |    |                                                |          |
|------------------------------------------------------------|-----------------|-------|-------------------------------------------------------|---------|-----|----|------------------------------------------------|----------|
| BAC end sequence                                           | CH241-102M19_T7 | 15    | F: TTGGTGATTTGTTGGGAGGG<br>R: TAGGTGAGGTTGAAGGAAGG    | 553     | 1.5 | 58 |                                                | AJ584457 |
| copper metabolism (Murr1) domain containing 1              | COMMD1          | 15    | F: TCTGGAAGAGCCATAAGACAA<br>R: CTGAGTGCCTTGACTGTGATT  | 120     | 1.5 | 59 |                                                | CX601484 |
| microsatellite                                             | COR014          | 15    | F: CTATCATGTCAGGGACCAGG<br>R: CTGCCCTAGTTAGCAACCAA    | 143-167 | 3.0 | 55 | Hopman et al. 1999                             | AF083457 |
| microsatellite                                             | COR042          | 15q26 | F: CAAATGTGCTCCATCTCCAAC<br>R: GCCAGCTCCCTTACTCTGTA   | 153-155 | 2.0 | 58 | Ruth et al. 1999;<br>Wagner et al. 2006*       | AF10835  |
| microsatellite                                             | COR075          | 15q27 | F: GCCCTAGTTAGCAACCAACA<br>R: AAGATTGATTCCTCAGCACG    | 192-214 | 2.0 | 58 | Tallmadge et al. 1999a;<br>Wagner et al. 2006* | AF142612 |
| microsatellite                                             | COR076          | 15    | F: GTCCTCACTCCTCTCACTGG<br>R: ACAGTCTGTCCACAGGGAAG    | 208     | 2.0 | 60 | Tallmadge et al. 1999a                         | AF142613 |
| microsatellite                                             | COR077          | 15    | F: AGGGAGCATTTGAACCAAGT<br>R: CAATGGTGGTAGAAGCAAGG    | 152-154 | 2.0 | 58 | Tallmadge et al. 1999a                         | AF142614 |
| catenin ,alpha 2                                           | CTNNA2          | 15    | F: CCATCATGGCACAACCTACCAC<br>R: CTGTCGTCCCATTTAGCCACT | 112     | 2.0 | 58 | Wagner et al. 2006                             |          |
| development and differentiation enhancing factor 2         | DDEF2           | 15    | F: CGAAGAGCAGTACACCCAAG<br>R: GCCGTCAACTCCTTTGTAAAC   | 120     | 1.5 | 59 |                                                | CX598654 |
| DEAD box polypeptide 1                                     | DDX1            | 15q26 | F: GCATTCATAACTAGCCTCACC<br>R: AAACGATGAGTCCATCACTTAC | 141     | 1.5 | 58 | Wagner et al. 2006*                            | DQ001086 |
| EGF-containing fibulin-like extracellular matrix protein 1 | EFEMP1          | 15    | F: AAGACTTCCCATCTGAAC<br>R: AGTCAGGAATCTTCTTAGAG      | 132     | 1.5 | 58 | Wagner et al. 2006                             | DQ001088 |
| eukaryotic translation initiation factor 5B                | EIF5B           | 15q12 | F: ACTGTGAAGAGCTGAGAGCC<br>R: AAACATCCCCACCCAAGAAC    | 101     | 1.5 | 58 | Wagner et al. 2006*                            | DQ001099 |
| F-box protein 11                                           | FBXO11          | 15    | F: GCTGCAAAAGTGGCTGAATG<br>R: AATGAACGGCAAGAGCAATG    | 114     | 1.5 | 58 | Wagner et al. 2006                             | DQ001124 |
| FOS-like antigen 2                                         | FOSL2           | 15    | F: AGGGTAGATATGCCTGGCTCA<br>R: GTCTTGATCACACCGGGTCTC  | 206     | 1.5 | 55 | Perrocheau et al. 2006                         | DX010485 |
| follicle stimulating                                       | FSHR            | 15q23 | F: TGTTATGTCCCTCCTTGTGCTC                             | 585     | 1.5 | 60 | Milenkovic                                     | S70150   |

|                                                                                          |         |               |                                                                                                                  |         |     |    |                                                                                                       |                    |
|------------------------------------------------------------------------------------------|---------|---------------|------------------------------------------------------------------------------------------------------------------|---------|-----|----|-------------------------------------------------------------------------------------------------------|--------------------|
| hormone receptor<br>glutamine-fructose-6-<br>phosphate<br>transaminase 1<br>hexokinase 2 | GFPT1   | 15            | R: GAAGCATTTCAGTCAGCAATGCC<br>F: GCCATAGAAGTTGGAGGAAC<br>R: CAGACAATCCCAAACAAAGAAC                               | 132     | 1.5 | 58 | et al 2002*<br>Wagner et<br>al. 2006                                                                  | DQ001093           |
| microsatellite                                                                           | HMS01   | 15q27         | F: CCAGCAATTCTTGAGTGCC<br>R: ACTCACCCAACTTCATTTTCC<br>F: CATCACTCTTCATGTCTGCTTGG<br>R: TTGACATAAATGCTTATCCTATGGC | 142     | 1.5 | 58 | Wagner et<br>al. 2006                                                                                 | DQ001095           |
| microsatellite                                                                           | HTG06   | 15q26-<br>q27 | F: CCTGCTTGGAGGCTGTGATAAGAT<br>R: GTTCACTGAATGTCAAATTCTGCT                                                       | 170-180 | 2.0 | 58 | Guérin et al.<br>1994;<br>Wagner et<br>al. 2006*<br>Ellegren et<br>al. 1992;<br>Breen et al.<br>1997* | X74630<br>AF169167 |
| inhibitor of DNA<br>binding 2                                                            | ID2     | 15            | F: GCCCAGTATAAACAGACTTTGC<br>R: AAGAGTTCACAAGGTTTCACTCA                                                          | 200     | 1.5 | 59 |                                                                                                       | CX602301           |
| interleukin 18<br>receptor accessory<br>protein                                          | IL18RAP | 15q12         | F: TGGATGACCAAACACTGAAAC<br>R: TCCACCAATCTCTCTACTCAC                                                             | 355     | 1.5 | 58 | Wagner et<br>al. 2006*                                                                                | CD467478           |
| interleukin 1, alpha                                                                     | IL1A    | 15q13-<br>q14 | F: ATGCCTGACACACCCAAAAC<br>R: GAAAGTCAGTGATAGAGGGTTGC                                                            | 172     | 1.5 | 55 | Perrocheau<br>et al. 2006                                                                             | DX010514           |
| interleukin 1, beta                                                                      | IL1B    | 15q13         | F: CTGCATGCTGCTCATCACTT<br>R: TGGGGTACATTGCAGACTCA                                                               | 212     | 2.0 | 58 | Caetano et<br>al. 1999;<br>Milenkovic<br>et al. 2002*                                                 | AF130767           |
| interleukin 1 receptor<br>antagonist                                                     | IL1RN   | 15q13-<br>q14 | F: TATTCCCAGCACGTCGATG<br>R: CAGAACAGCATCAGATTCCAA                                                               | 403     | 2.0 | 58 | Lindgren et<br>al. 2001*                                                                              | D83714             |
| intersectin 2                                                                            | ITSN2   | 15            | F: CAGCATTGGGAACACAGAG<br>R: AGGTAAAATGAGTGACAACAGG                                                              | 120     | 1.5 | 58 | Wagner et<br>al. 2006                                                                                 | DQ001100           |
| microsatellite                                                                           | LEX046  | 15            | F: ATAAGCCAATCCACTTTTCC<br>R: ATTACCACCCATTTCCTT                                                                 | 115-127 | 3.0 | 58 | Coogle et al.<br>1997                                                                                 | AF075648           |
| microsatellite                                                                           | LEX051  | 15            | F: CCTACGTGTCTCTTTCTCTTT<br>R: GTAACGCAATAATACAGCACT                                                             | 130-144 | 2.0 | 58 | Coogle et al.<br>1997                                                                                 | AF075653           |
| luteinizing<br>hormone/choriogona<br>dotropin receptor                                   | LHCGR   | <b>15q22</b>  | F: GCCATAGACTGGCAGACAGG<br>R: AGGCAGCYGAGATGGCAA                                                                 | 190     | 2.0 | 60 |                                                                                                       |                    |
| latent transforming                                                                      | LTBP1   | 15q24         | F: CCTTTTGCTATGTTTTTCTGCC                                                                                        | 141     | 1.5 | 58 | Wagner et                                                                                             | DQ001106/          |

|                                                       |              |              |                                                           |         |     |    |                                               |                       |
|-------------------------------------------------------|--------------|--------------|-----------------------------------------------------------|---------|-----|----|-----------------------------------------------|-----------------------|
| growth factor beta binding protein 1                  |              |              | R: GCTGAAGTGTCTCTTTTGGTCTG                                |         |     |    | al. 2006*                                     | DQ001107              |
| mitogen-activated protein kinase kinase 3             | MAP4K3       | 15           | F: TGAGGAGAGGAGAAGGAAGG<br>R: GAAAGGAGAAACAAGGGGC         | 129     | 1.5 | 58 | Wagner et al. 2006                            | DQ001108              |
| methionine adenosyltransferase II, alpha              | MAT2A        | 15           | F: AAGCAAAACAATCAGCAAGAC<br>R: AGGGACGGAAAAACAAGAAC       | 170     | 1.5 | 58 | Wagner et al. 2006                            | DQ009808/<br>DQ009809 |
| multiple coagulation factor deficiency 2              | MCFD2        | <b>15q22</b> | F: CTGGGGAGAGACCATTACCC<br>R: CAATTCAGCTCTGATTGCACA       | 392     | 3.0 | 58 |                                               |                       |
| malate dehydrogenase 1                                | MDH1         | 15q21.3      | F: AGAAAGAACATAGCCTTAGCAG<br>R: GAAAAAGTCACCTCCACCAG      | 200     | 1.5 | 58 | Milenkovic et al. 2002;<br>Wagner et al. 2006 | DQ001109              |
| c-mer proto-oncogene tyrosine kinase                  | MERTK        | 15           | F: GTTGCGAGATGACATGAC<br>R: TACATCTCATGGTTCTGGAC          | 916     | 1.5 | 50 |                                               | CF767046              |
| MOB1, Mps One Binder kinase activator-like 1B (yeast) | MOBK1B       | 15           | F: CTCCAGCTCACAGAATGGAC<br>R: GAAACACTGGACTGCCTGC         | 399     | 2.0 | 58 |                                               | BI395139              |
| myelin transcription factor 1-like                    | MYT1L        | 15           | F: GCCCGACAGAACTGTAAGAC<br>R: ATTCAATATACAGCACTTGCCC      | 143     | 1.5 | 58 | Wagner et al.2006                             | DQ001112              |
| nuclear receptor binding protein 1                    | NRBP1 (NRBP) | 15           | F: CAACGTAAGTCCCTTTGGC<br>R: TCCTACGAGTGAAGAATCCC         | 115     | 1.5 | 58 | Wagner et al. 2006                            | DQ001114              |
| microsatellite                                        | NVHEQ083     | 15           | F: TTGTTGCTGTTGCTGGTG<br>R: TGGAATGGAGGATGAACAGATA        | 121-123 | 2.0 | 58 | Bjernstad et. al 1999                         | AJ245771              |
| poly(A) polymerase gamma                              | PAPOLG       | 15           | F: AACTGAGCATGCGTTCA<br>R: TGTGTCTCATGCCATCCT             | 370     | 2.0 | 60 | Wagner et al. 2006                            | AK023034              |
| paired box gene 8                                     | PAX8         | 15           | F: TTGGGGGAATCATGACAGAG<br>R: AGGATGTGGTGTATGAGGAAG       | 214     | 1.5 | 58 | Wagner et al. 2006                            | DQ001116/<br>DQ001117 |
| pellino homolog 1 (Drosophila)                        | PELI1        | 15           | F: GATCATTTGGGTTCACTCAGG<br>R: CACAGGACTTGATTTTCCTTGC     | 172     | 1.5 | 55 | Perrocheau et al. 2006                        | DX010553              |
| pleckstrin                                            | PLEK         | 15           | F: CCCCGTGAGGAAAGAAGAGTAGG<br>R: CGAGGAGCAGGAATAGTCTCATGG | 104     | 2.0 | 58 | Wagner et al. 2006                            | BI961655              |
| proopiomelanocortin                                   | POMC         | 15q25        | F: GCCCTATAAAATGGAGCACTT<br>R: GCTTAAACAGGCCGAGTATCT      | 250     | 1.5 | 57 |                                               | CX598023              |

|                                                         |                              |       |                                                        |           |     |    |                         |          |
|---------------------------------------------------------|------------------------------|-------|--------------------------------------------------------|-----------|-----|----|-------------------------|----------|
| protein phosphatase 1, catalytic subunit, beta isoform  | PPP1CB                       | 15q25 | F: CAAAGACGATATTAAGGTCAAG<br>R: AAGGAGTAGAAAAGTCAGCA   | 215       | 1.5 | 58 | Wagner et al. 2006*     | BM414639 |
| prominin 2                                              | PROM2                        | 15    | F: GCGACTCCTTTCCAGCCCAC<br>R: TCAGCCCTTCCCCTCAGCTC     | 95        | 1.5 | 58 | Wagner et al. 2006      | DQ001104 |
| RAB10, member RAS oncogene family                       | RAB10                        | 15    | F: GCGGACTTTCTGCTCAGG<br>R: GTCCCTCTCACTACTGCCAAC      | 350       | 2.0 | 55 |                         |          |
| RAN binding protein 2                                   | RANBP2                       | 15    | F: CCACCCCAATTTCTATCCC<br>R: AGTCCTAAACACCCAGCTTC      | 164       | 1.5 | 58 |                         |          |
| receptor accessory protein 1                            | REEP1<br>( <i>FLJ13110</i> ) | 15    | F: CACATTTCAAAGGCCAGC<br>R: TGTTGACTAGGGAGTTGGTTC      | 397       | 2.0 | 58 | Wagner et al. 2006      |          |
| REV1 homolog (S. cerevisiae)                            | REV1L                        | 15    | F: GGTCCAGTTTTTCCAAATC<br>R: GGAGCTGTGGAGTTCAGTAA      | 440       | 4.0 | 60 | Wagner et al. 2006      |          |
| Rho-associated, coiled-coil containing protein kinase 2 | ROCK2                        | 15q26 | F: TTTATAAGAGCACGTCCCATT<br>R: ACTTCCGATAGCATAGGTAACC  | 169       | 1.5 | 58 | Wagner et al. 2006*     | DQ001119 |
| ribose 5-phosphate isomerase A                          | RPIA                         | 15    | F: GCTTCATTGTGATTGCTGATT<br>R: ACTGGGACGTAGGCCATT      | 800       | 1.5 | 62 |                         | DN507232 |
| radical S-adenosyl methionine domain containing 2       | RSAD2                        | 15q27 | F: CATCTCCTGTGACAGCTTTG<br>R: TCTGTTCCCTCATATCCTCTTC   | 179       | 1.5 | 58 | Wagner et al. 2006*     | CD471892 |
| reticulin 4                                             | RTN4                         | 15    | F: CTGTCTTGACTGCCATGTG<br>R: CAAGTCTGTGCGATGCAGT       | 606       | 1.5 | 55 |                         |          |
| microsatellite                                          | S22                          | 15    | F: ATAGGTAATCCCTGGTGGGC<br>R: TTTCATCTAGCTACCAGCCTCC   | biallelic | 1.5 | 58 | Swinburne et al. 2005   |          |
| sema domain, immunoglobulin domain , 4C                 | SEMA4C                       | 15    | F: TGA AAAA ACCCAAAGAAGGTG<br>R: AGTGGACCACGTTTCCTGAAG | 133       | 1.5 | 55 | Perrocheau et al. 2006  | DX010579 |
| septin 10                                               | SEPT10                       | 15    | F: TGGCCATCTGATTGCATTT<br>R: CCAGGTTCAAAGGTATTTGTCA    | 330       | 2.0 | 58 |                         |          |
| surfactant, pulmonary-associated protein B              | SFTPB                        | 15    | F: CTACCCACGCCAGAGTTAC<br>R: CGTGAAGGTATGAGGGGTGT      | 206       | 2.0 | 58 | Shubitowski et al. 2001 | AY008812 |
| microsatellite                                          | SGCV06                       | 15q24 | F: GGGCCTGGTTTTCTTCTAA<br>R: GCATTTGTGGCCTGTGTCATA     | 167       | 3.0 | 58 | Godard et al. 1997*     | U90588   |
| microsatellite                                          | SGCV21                       | 15q23 | F: GCACCAACTCCACTTTTGTCCAG                             | 120       | 2.0 | 58 | Godard et.              | U90599   |

|                                                       |         |       |                                                                                     |         |     |    |                                            |                      |
|-------------------------------------------------------|---------|-------|-------------------------------------------------------------------------------------|---------|-----|----|--------------------------------------------|----------------------|
| solute carrier family 1, member 4                     | SLC1A4  | 15    | R: GCTGAGTATTTATGTTGCTCTAAAGC<br>F: AACACCAATCTCGCCATAAC<br>R: ACTGAAAACCAACACAACCC | 129     | 1.5 | 58 | al. 1997*<br>Wagner et al. 2006            | DQ001121             |
| solute carrier family 3, member 1                     | SLC3A1  | 15    | F: CAACTTCACTGCGTTTGTAGG<br>R: CAGTCTTTCTCGTGGTTCTGA                                | 120     | 1.5 | 60 |                                            |                      |
| solute carrier family 8, member 1                     | SLC8A1  | 15    | F: AGAAGGCAATGAAACCGG<br>R: TTGGTAGTCTCTCCATTG                                      | 250     | 1.5 | 60 |                                            | DQ329035             |
| solute carrier family 20, member 1                    | SLC20A1 | 15    | F: ACATCTGTACACAGAGAAGCC<br>R: CTCAGAAGCGAATGCCAAG                                  | 225     | 1.5 | 58 |                                            |                      |
| spectrin, beta, non-erythrocytic 1                    | SPTBN1  | 15q22 | F: TGGGGCTTTTCGAAGTTACTG<br>R: CAAAGGTTCACTGCCAAACA                                 | 200     | 2.0 | 58 | Lear et al. 2000*;<br>Wagner et al. 2006   | AF130782<br>AF218582 |
| sulfotransferase family, cytosolic, 1C, member 1      | SULT1C1 | 15    | F: TGTCATACCACAGACTGGG<br>R: TGAGGGTAAGGTGGAATGAG                                   | 243     | 1.5 | 58 |                                            |                      |
| TBC1 domain family, member 8                          | TBC1D8  | 15    | F: CTGAAAATGACCGAGACAGC<br>R: GGCTCATTTTGGGCAACTC                                   | 622     | 1.5 | 58 |                                            | BM029703             |
| TIA1 cytotoxic granule-associated RNA binding protein | TIA1    | 15    | F: CCTGCATATGGAATGTATGGC<br>R: GCTGCACTCCGTAATTTGGTC                                | 974     | 3.0 | 50 | Wagner et al. 2006                         | BI961840             |
| microsatellite                                        | TKY011  | 15    | F: ATGAGAGAGGTCACCAAAAT<br>R: CCCTGCCAACAAAAACCTTG                                  | 130     | 2.0 | 55 | Hirota et al. 2001                         | AB048322             |
| microsatellite                                        | TKY104  | 15    | F: GAAAAGACATCAGCAAGTGGTC<br>R: GCCTAAAACTAACTTCCAGAAGG                             | 153     | 2.0 | 58 | Mashima et al. 2001                        | ABO53343             |
| microsatellite                                        | TKY327  | 15    | F: CCTGGTATATCTCCTAACAC<br>R: GATCTAGCTATTTCTCTCGTG                                 | 87-91   | 1.5 | 58 | Tozaki et al. 2001                         |                      |
| microsatellite                                        | TKY369  | 15    | F: GCCATGTAGTTTACTCGCAC<br>R: GAGTGTGAGAACCCTTCAGAG                                 | 104-140 | 1.5 | 58 | Tozaki et al. 2001                         |                      |
| microsatellite                                        | TKY383  | 15    | F: CTTCTTCCAATCTCTATGC<br>R: TTTCTATACGGCAGGAGAAG                                   | 160-172 | 2.0 | 55 | Tozaki et al. 2001                         | AB044883             |
| microsatellite                                        | TKY392  | 15    | F: CCCGTTTAAAGTAGCAACAC<br>R: CACCTTACTCTTTCAAGTGG                                  | 121-129 | 1.5 | 58 | Tozaki et al. 2001                         |                      |
| microsatellite                                        | TKY433  | 15q26 | F: TCCCATCTCCTTTTGTCTGC<br>R: GCCAGAATGAACTAAGACCCTCT                               | 292-296 | 1.5 | 58 | Tozaki et al. 2004;<br>Wagner et al. 2006* | AB103651             |

|                |         |    |                                                     |         |     |    |                       |          |
|----------------|---------|----|-----------------------------------------------------|---------|-----|----|-----------------------|----------|
| microsatellite | TKY518  | 15 | F: GATCCCCCACTGGCCTTA<br>R: ACGAACTCCAACAAATGCAA    | 149-165 | 1.5 | 55 | Tozaki et al.<br>2004 | AB103736 |
| microsatellite | TKY531  | 15 | F: ACCACTTAAACCGCGCTTC<br>R: GGTCTTTTAAGCTCTGCTCG   | 160     | 2.0 | 58 |                       | AB103749 |
| microsatellite | TKY541  | 15 | F: GAGGAGGGGCTTTCTCTCTC<br>R: TGCAAAAAGCCAACATTTCC  | 106-124 | 1.5 | 58 | Tozaki et al.<br>2004 | AB103759 |
| microsatellite | TKY565  | 15 | F: GGGGCGTTAAGGCAGTAAG<br>R: ATGCGCTTCAGCATCTCTTT   | 192-208 | 1.5 | 58 | Tozaki et al.<br>2004 | AB103783 |
| microsatellite | TKY571  | 15 | F: ACAGCACAGCAGCAAACAAA<br>R: CAGTGGGCCCAGGTGTATAG  | 122-130 | 1.5 | 58 | Tozaki et al.<br>2004 |          |
| microsatellite | TKY629  | 15 | F: TCAGTCCCTGGTCTGAAAAA<br>R: GTCCCTACCTGGTTCCCAAG  | 186-188 | 1.5 | 58 | Tozaki et al.<br>2004 |          |
| microsatellite | TKY743  | 15 | F: ACAAGGTGCCACAGTCAACA<br>R: TTGGGCTTGAGAGGAAAGAA  | 170-206 | 1.5 | 50 | Tozaki et al.<br>2004 |          |
| microsatellite | TKY779  | 15 | F: GAAATTTGGGGAGCCAAAGG<br>R: TATACAGAAGCCAGTTCCAG  | 146     | 2.0 | 58 |                       | AB103997 |
| microsatellite | TKY795  | 15 | F: AGAGTAATGTGGTGGAGGAG<br>R: TTTTGTGGCTAGGTTTGGG   | 151     | 2.0 | 58 | Tozaki et al.<br>2004 | AB104013 |
| microsatellite | TKY814  | 15 | F: ATGCAAAGTCCAGAAACAGA<br>R: TGGGGAACCTCTAAATAACG  | 155     | 2.0 | 58 |                       | AB104032 |
| microsatellite | TKY815  | 15 | F: CCATGGAAGGTCACAAGATG<br>R: TCTGTACTTTCTACCACAGC  | 237     | 1.5 | 62 |                       | AB104033 |
| microsatellite | TKY861  | 15 | F: GACTCCAGTGTGTTTAGAGG<br>R: CAGGACTGCCACAGCTTC    | 241     | 2.0 | 58 |                       | AB104079 |
| microsatellite | TKY885  | 15 | F: TCAAAGTGAAGCTTCCTGG<br>R: TGGAAACTCATCCTCTAAGG   | 230     | 2.0 | 58 | Tozaki et al.<br>2004 | AB104103 |
| microsatellite | TKY926  | 15 | F: GATCATGTACTGGGCACAG<br>R: ATGAGCAACCGGGTGTAAAG   | 89      | 2.0 | 58 | Tozaki et al.<br>2004 | AB104144 |
| microsatellite | TKY976  | 15 | F: ATCAATCTGAGGGCCACAG<br>R: CATTTCCATTTGCAGAGTCAC  | 177     | 2.0 | 58 |                       | AB104194 |
| microsatellite | TKY1015 | 15 | F: ACTGCCTTCAAGTTTCATCC<br>R: TGGAAACAGCCTAAGTGTTTC | 149     | 2.0 | 58 |                       | AB104233 |
| microsatellite | TKY1033 | 15 | F: AGACATGGATTTAGGGAGTG<br>R: GCAGAGCCATGCTAAACTG   | 146     | 2.0 | 58 | Tozaki et al.<br>2004 | AB104251 |
| microsatellite | TKY1091 | 15 | F: ACAAGTGGAAAGAAGTGAG<br>R: CCATCTGCAGAAGTAATCCA   | 140     | 2.0 | 58 | Tozaki et al.<br>2004 | AB104309 |
| microsatellite | TKY1095 | 15 | F: TTGAGTTGTGTCCTCTCATC                             | 158     | 2.0 | 58 |                       | AB104313 |

|                   |         |       |                                                                               |     |     |    |                        |          |
|-------------------|---------|-------|-------------------------------------------------------------------------------|-----|-----|----|------------------------|----------|
| microsatellite    | TKY1165 | 15    | R: CTCAGTTCACAAGGCTTGAG<br>F: AAGACCAACACCGTAAAAATC<br>R: CCTACCAGAGTCCAGATTC | 300 | 1.5 | 58 |                        | AB104383 |
| microsatellite    | TKY2469 | 15    | F: TGTTATTTGGAGAGAGCTTG<br>R: GTGGAAGATTAAAGAACTGTG                           | 207 | 1.5 | 60 | Tozaki et al. 2007     | AB216412 |
| microsatellite    | TKY2783 | 15    | F: GCTGATACCAGTGGAGGCTA<br>R: AGGTGGTCTTACTTGCACGA                            | 249 | 1.5 | 58 | Tozaki et al. 2007     | AB216726 |
| microsatellite    | TKY2810 | 15    | F: GAGCCTTGAAAAGAGGGAAC<br>R: GGCAATCACCTAGCTTGAGA                            | 221 | 1.5 | 58 | Tozaki et al. 2007     | AB216753 |
| microsatellite    | TKY2891 | 15    | F: TAGGGGTGCCTGAAACAATA<br>R: CTGTGTCCCATACCTTGAGC                            | 204 | 1.5 | 58 | Tozaki et al. 2007     | AB216898 |
| microsatellite    | TKY2955 | 15    | F: ATATCATGGCCAGATTCAGC<br>R: CCATTCTTGGAAGTCCACAT                            | 242 | 1.5 | 58 | Tozaki et al. 2007     | AB216935 |
| microsatellite    | TKY2992 | 15    | F: TGAACGTGGTAAATTGCAGA<br>R: CCAACTCCAGTGAATAATTTTGA                         | 185 | 1.5 | 58 | Tozaki et al. 2007     | AB217345 |
| microsatellite    | TKY3086 | 15    | F: GAGTCCCCCAGGATTAACAT<br>R: TCAAGAAATATCTCTAAAGAACAAAGA                     | 156 | 1.5 | 58 | Tozaki et al. 2007     | AB217029 |
| microsatellite    | TKY3402 | 15    | F: GTCACCTGAACCTTACTTC<br>R: CCCTCTTAAGAGCTTCTTTC                             | 116 | 1.5 | 58 | Tozaki et al. 2007     | AB217469 |
| microsatellite    | TKY3526 | 15    | F: TCTCACTTTCAACTGGAAGA<br>R: AACAGCTGATACAGCAATTC                            | 113 | 1.5 | 58 | Tozaki et al. 2007     | AB217469 |
| thymosin, beta 10 | TMSB10  | 15    | F: TTCCTAAGAACCTGGAGGATTTTC<br>R: AAACCGAAGAATTTGGCAGTC                       | 193 | 1.5 | 55 | Perrocheau et al. 2006 | DX010599 |
| microsatellite    | UMNe084 | 15q26 | F: ACAGTTGGATATCCGTGGGAAC<br>R: TCTGTTATGTGTTGCCCTCTGC                        | 216 | 1.5 | 58 | Wagner et al. 2006     | AY391284 |
| microsatellite    | UMNe102 | 15    | F: ATGCATGCTCATTGCAGAAC<br>R: GCACAAAGAAATTTCCAACTCC                          | 191 | 1.5 | 58 | Wagner et al. 2004a    | AY391290 |
| microsatellite    | UMNe149 | 15    | F: AAATGATTTGATAGCACCAGGG<br>R: TTTCTATGCATAGACAGCAAGG                        | 114 | 1.5 | 58 | Mickelson et al. 2003  | AF536263 |
| microsatellite    | UMNe156 | 15    | F: AGACTAGCTTCAAATTGCCCC<br>R: TCAATTGCCTATGCTTGAAGG                          | 126 | 1.5 | 58 | Mickelson et al. 2003  | AF536268 |
| microsatellite    | UMNe198 | 15    | F: CAAGAACTGGCATCAGAATTTC<br>R: TCTTGGGTCTCACTCACTCTCC                        | 152 | 2.0 | 58 | Mickelson et al. 2003  | AF536283 |
| microsatellite    | UMNe219 | 15    | F: GTGTCCACTGAAGGATAAAGGG<br>R: TAGCATAATGGCCCTCAAGG                          | 164 | 2.0 | 55 | Mickelson et al. 2003  | AF536298 |
| microsatellite    | UMNe222 | 15    | F: ACCGCATTCTCTTTCAGGTG<br>R: CTGGGTAACTGACTGGAAAAGG                          | 151 | 2.0 | 58 | Mickelson et al. 2003  | AF536300 |



|                                         |         |       |                                                      |     |     |    |                       |          |
|-----------------------------------------|---------|-------|------------------------------------------------------|-----|-----|----|-----------------------|----------|
| microsatellite                          | UMNe245 | 15    | F: TTGCATAGGGACAATCCTACG<br>R: ACAAACCCTACCACTCGGC   | 104 | 2.0 | 55 | Wagner et al. 2004a   | AY391327 |
| microsatellite                          | UMNe250 | 15    | F: ATGTTTCAGTGCCTCACCTCC<br>R: GTCTTCGCATTTTAGCCTGC  | 202 | 2.0 | 58 | Mickelson et al. 2003 | AF536318 |
| microsatellite                          | UMNe275 | 15    | F: GTCAACAAAGAGCCTGCTCC<br>R: TCTGCAAAGTGTTGTTGTGATG | 221 | 2.0 | 58 |                       |          |
| microsatellite                          | UMNe373 | 15    | F: AGGCCACTCAAGCCACAG<br>R: CACCTCCTCCTCCAAATGAG     | 265 | 2.0 | 58 | Wagner et al. 2004a   | AY391355 |
| microsatellite                          | UMNe388 | 15q27 | F: ATCCTAGGGTAGAGCCTGCC<br>R: TGGGCCTTTACTCCACCTC    | 237 | 2.0 | 58 | Wagner et al. 2006    | AY464474 |
| microsatellite                          | UMNe575 | 15    | F: CTTTTGAGGAATCTCCATACCG<br>R: GGACCAGGCTGTTTCTGAAC | 300 | 1.5 | 58 | Wagner et al. 2004c   | AY735277 |
| microsatellite                          | UMNe605 | 15    | F: GTTCTGTCACCTTCACTTGCC<br>R: TTCCTAACCCTCCAGGGTG   | 285 | 1.5 | 58 |                       |          |
| vaccinia related kinase 2               | VRK2    | 15q22 | F: TGTCTCTCCTTCTCTCCTAC<br>R: ACACACACATACACAGACATTC | 225 | 1.5 | 58 | Wagner et al. 2006*   | DQ001125 |
| xanthine dehydrogenase                  | XDH     | 15    | F: CAGGGAATCCCTTCCACTAC<br>R: CTGGAGCCAACATCCATGAC   | 900 | 1.5 | 58 | Wagner et al. 2006    | BI961081 |
| zinc finger protein 36, C3H type-like 2 | ZFP36L2 | 15    | F: CTTTGCTTCTCTGTCTTTCC<br>R: CGAGCCACGACGAATAAC     | 150 | 1.5 | 58 |                       |          |

| Name                                           | Symbol  | Horse chr.          | Primers                                               | Product size (bp) | MgCl <sub>2</sub> (mM) | T <sub>a</sub> | Reference              | Accession No |
|------------------------------------------------|---------|---------------------|-------------------------------------------------------|-------------------|------------------------|----------------|------------------------|--------------|
| sequence tagged site                           | 16STS01 | 16                  | F: GAGGCCAGATTTGATTCCAAC<br>R: TAGATGGTAACTCCTTGCCA   | 1333              | 1.5                    | TD 58          |                        | CF722812     |
| abhydrolase domain containing 5                | ABHD5   | 16                  | F: CTAAACGCGCAGCCTAAGTC<br>R: CCTGTCCTGCTTTTAGTCACTC  | 164               | 1.5                    | 58             |                        |              |
| acetyl-Coenzyme A acyltransferase 1            | ACAA1   | 16q21.3             | F: CAAGATACCTTTGCACTGGCT<br>R: GCACAATCTCAGCTTGGA     | 1164              | 1.5                    | 58             | Mariat et al. 2001*    |              |
| aminoacylase 1                                 | ACY1    | 16                  | F: GAGGAGGCTGAAGGCTGAG<br>R: CGCTGCACAAACAGTTTCAT     | 191               | 1.5                    | 58             |                        |              |
| microsatellite                                 | AHT014  | 16                  | F: GAGAAGCAATCACACACACACA<br>R: GCTCTTTCCATGGGTGGTAG  | 138-151           | 2.0                    | 65             | Swinburne et al. 1997  |              |
| microsatellite                                 | AHT037  | 16qcen <sup>a</sup> | F: ATTTACCCACTCCCAACC<br>R: TTTCGTTTGCACAAATATGG      | 206-218           | 2.0                    | 58             | Swinburne et al. 2000  | AJ271522     |
| microsatellite                                 | AHT038  | 16q21.1             | F: TTCATGGCCTTCAAACTCC<br>R: CCAGCTGGGGATACTTACCA     | 130-140           | 2.0                    | 58             | Swinburne et al. 2000* | AJ271523     |
| microsatellite                                 | AHT060  | 16                  | F: GGTCAAGCTTTTGGTTTTTCC<br>R: CCTAAGGAAGAGCTGTTCTTGC | 282-308           | 2.0                    | 58             | Swinburne et al. 2003  | AJ507677     |
| microsatellite                                 | AHT063  | 16                  | F: CCATGTGTTCACAACTCGG<br>R: GAGGGTTGGAACCTTTCAGTCC   | 108-110           | 2.0                    | 58             | Swinburne et al. 2003  | AJ507680     |
| microsatellite                                 | AHT081  | 16                  | F: AACTCAGGGGCAGACAAATG<br>R: TTGGAACCTTTCAGTCCAGGG   | 198-200           | 2.0                    | 58             | Swinburne et al. 2003  | AJ507698     |
| microsatellite                                 | AHT091  | 16                  | F: TAGCTGTCTGCAAAGGCTCA<br>R: CCAGTGTTCCACATGCCTC     | 108-118           | 2.0                    | 58             | Swinburne et al. 2003  | AJ507708     |
| ADP-ribosylation factor 4                      | ARF4    | 16                  | F: TCGCTCCGTTAATTCCTGTCCC<br>R: GCCGCCTCCTTTCAAGCTCC  | 126               | 1.5                    | 60             |                        | CD466539     |
| Rho guanine nucleotide exchange factor (GEF) 3 | ARHGEF3 | 16                  | F: TTGTTCCCAGAATGAGTCGTG<br>R: GACCAGGGCTGGAAGCAGAT   | 107               | 1.5                    | 54             |                        |              |

|                                                              |                  |              |                                                         |     |     |       |                        |          |
|--------------------------------------------------------------|------------------|--------------|---------------------------------------------------------|-----|-----|-------|------------------------|----------|
| basic helix-loop-helix domain containing, class B, 2         | BHLHB2           | 16           | F: CTACTTGCCCATGCTGGAGAAG<br>R: GTTCATGAATCTGGTGAGGGCTG | 100 | 1.5 | 58    |                        | BI961704 |
| chromosome 3 open reading frame 10                           | C3orf10          | 16           | F: CTTGTCAATGTGTTTGAGGCAT<br>R: CAAGTTGAGGAGTTTATTCGGG  | 361 | 1.5 | 59    |                        | CX594448 |
| calcium channel, voltage-dependent, L type, alpha 1D subunit | CACNA1D          | 16           | F: GAAGGCTTAGGACGGTACGC<br>R: CTGTAGCCAGGCCCAAAGTC      | 209 | 1.5 | 55    | Perrocheau et al. 2006 | DX010443 |
| chemokine (C-C motif) receptor-like 2                        | CCRL2            | 16           | F: CGGGAAGAAGGGAGGTGTTA<br>R: GAGGAAAGCGTCTCCATGTC      | 626 | 1.5 | TD 55 |                        | CD465256 |
| CDV3 homolog (mouse)                                         | CDV3             | 16           | F: TGGTACAATGGACAGCCTCA<br>R: GGGGTTGTGTTATTGAAGAATA    | 207 | 1.5 | 60    |                        |          |
| BAC end sequence                                             | CH241-100I1_T7   | 16           | F: TGCTACCAGAAATAGCAACAC<br>R: ACATATTGCAGGCAATGCAC     | 520 | 1.5 | 60    |                        | AJ543004 |
| BAC end sequence                                             | CH241-100N15_T7  | <b>16q16</b> | F: GCCCTTTCTAAGCAACAATCAC<br>R: CATCCTCAATGGAGCCTCAC    | 539 | 1.5 | 60    |                        | AJ543200 |
| BAC end sequence                                             | CH241-101A11_SP6 | 16           | F: CTCCAGAAGTCACATCACTAAC<br>R: GAATAAGTGGCAGTGGGAATAG  | 574 | 1.5 | 58    |                        | AJ576431 |
| BAC end sequence                                             | CH241-102N14_T7  | 16           | F: GCTAGACCTTAACTTCTGCCC<br>R: TACCTGCCTTCAATGCTGCC     | 293 | 1.5 | 60    |                        | AJ584489 |
| BAC end sequence                                             | CH241-111J21_SP6 | <b>16q14</b> | F: CAAAAATTCTTCCCCATTAG<br>R: TCCAAATTTCCACATCTGAAG     | 600 | 1.5 | 58    |                        | CR956118 |
| cell adhesion molecule with homology to L1CAM                | CHL1             | 16           | F: CTACCCAGGTCCAATTTATCCC<br>R: GGCAGACGAAGTTACATACAG   | 205 | 1.5 | 58    |                        |          |
| cytokine inducible SH2-containing protein                    | CISH             | 16           | F: CTGGAAGTCCTGGCACTGA<br>R: TCTGCGCAGATGGAGCTCT        | 169 | 1.5 | 58    |                        | BI961934 |
| coatamer protein complex, subunit                            | COPB2            | 16           | F: GTTGCAAGGAAGAATTGGGTT<br>R: GAACTCTCTCCAGAGTATTG     | 288 | 1.5 | 58    |                        |          |

beta 2

|                                                   |          |                              |                                                             |         |     |       |                                             |          |
|---------------------------------------------------|----------|------------------------------|-------------------------------------------------------------|---------|-----|-------|---------------------------------------------|----------|
| coatamer protein complex, subunit gamma           | COPG     | 16                           | F: GCAGGTGACAGCCAGAAGTT<br>R: GGGACAAGATGGTTTTAGGG          | 375     | 1.5 | TD 62 |                                             | BM780459 |
| microsatellite                                    | COR039   | 16                           | F: ACGTTGGCTCTGCTTTATGT<br>R: ATCCAGGCTCTGAATCCACT          | 254     | 2.0 | 58    | Murphie et al. 1999                         | AF101408 |
| microsatellite                                    | COR052   | 16                           | F: CAGGTGGTGCTAGTTTTCCA<br>R: ACCACTGCTTTGAGGACCTAG         | 230-232 | 2.0 | 55    | Ruth et al. 1999                            | AF108369 |
| microsatellite                                    | COR064   | 16                           | F: TCCATACATGTGTGAGGGC<br>R: AAGATGGCTTACAAGGATTATG         | 188-198 | 3.0 | 55    | Tallmadge et al. 1999a                      | AF142601 |
| ceruloplasmin (ferroxidase)                       | CP       | 16q25                        | F: ATTGAGCCAATCGGAGTGAG<br>R: ATGATACACAAGCGGGTTCC          | 200     | 2.0 | 58    | Godard et al. 2000* ; Chowdhary et al. 2003 | AF134057 |
| cysteine-rich with EGF-like domains 1             | CRELD1   | 16                           | F: CGCCTGGTAGAGGTGCTT<br>R: TGAAACCACCAGCTCTCCAC            | 101     | 2.0 | 58    |                                             |          |
| cartilage associated protein                      | CRTAP    | 16q21.1                      | F: CCATCCTCTGATCCAGCAAAGAT<br>R: GAATGAGTGAAAATAGACTCCCTCTG | 274     | 2.0 | 58    | Chowdhary et al. 2003*                      |          |
| catenin beta 1                                    | CTNNB1   | 16                           | F: TGTCGATTAATTCCAGGTCAAG<br>R: TTGTTGGTGTGATCCTGTTC        | 204     | 1.5 | 58    |                                             |          |
| deleted in azoospermia-like                       | DAZL     | <b>16q22.3</b>               | F: TCGGTAAACATCCAAAGTCCTC<br>R: GAAACCTCCAGACGCTTGCTA       | 135     | 1.5 | 54    |                                             |          |
| dynein, cytoplasmic 1, light intermediate chain 1 | DYNC1LI1 | 16                           | F: ACCTATATCACAAAGGCCTC<br>R: CTTTCATTTCTTCAGGAGGA          | 180     | 1.5 | 58    |                                             |          |
| eukaryotic translation initiation factor 1B       | EIF1B    | 16                           | F: CTGTTTCAGGGCATTGCAGAT<br>R: GCTGAATAACCTCTCCGTATTC       | 530     | 1.5 | 58    |                                             |          |
| forkhead box P1                                   | FOXP1    | <b>16q14-q15<sup>a</sup></b> | F: ATACCAAACCTAACCAGCAACC<br>R: AAAAAAGTAACACTCCCGTCC       | 228     | 1.5 | 60    |                                             | CD528822 |
| FERM domain containing 4B                         | FRMD4B   | 16                           | F: AAACCTCTTCGCTCATCAAATCC<br>R: TTTTCGCCTCCAATGTCACC       | ~ 685   | 1.5 | 60    |                                             | CD471098 |

|                                                    |                    |               |                                                            |         |     |          |                                                         |          |
|----------------------------------------------------|--------------------|---------------|------------------------------------------------------------|---------|-----|----------|---------------------------------------------------------|----------|
| ghrelin/obestatin<br>preprohormone                 | GHRL               | 16q13         | F: CTGGGTGGACTTGACCATG<br>R: TGCTAGAAAGGAGGCGTTC           | ~300    | 1.5 | 58       |                                                         |          |
| galactosidase, beta<br>1                           | GLB1               | 16            | F: AACGACACTCAAAAGCCAAGA<br>R: GGCAAAATTGGTCCACCTA         | 196     | 2.0 | 58       | Chowdhary<br>et al. 2003                                | AF130765 |
| golgi autoantigen,<br>golgin subfamily a,<br>4     | GOLGA4             | 16            | F: GAAAAGCTGTTGCAGAGG<br>R: CTTCATGTTGCTTTGCTTC            | 124     | 2.0 | 58       |                                                         |          |
| G protein-coupled<br>receptor 175                  | GPR175<br>(TPRA40) | 16            | F: CAGTTCGATTTCGGCCAGTG<br>R: TCGCTGTCCGTACTGTTGATG        | 89      | 1.5 | 55       | Perrocheau et<br>al. 2006                               | DX010601 |
| glutathione<br>peroxidase 1                        | GPX1               | 16q21.1       | F: TTTTCGGCCCCCTCAATATTCC<br>R: AGAAGAGAGAACTGAGGGCCAA     | 244     | 3.0 | 58       | Milenkovic<br>et al. 2002*:<br>Chowdhary<br>et al. 2003 |          |
| glycogenin 1                                       | GYG1               | 16q25         | F: GTGATTCTGCACATCTAACCTT<br>R: GAGTATCTGCATCCATGAATAC     | ~110    | 1.5 | 58       | Godard et al.<br>2000*                                  |          |
| microsatellite                                     | HMS74              | 16q21         | F: CTGGTGTGGCCTACACGCCA<br>R: CCACCCTCACCCCTATGGGC         | ~200    | 1.5 | 58       | Mariat et al.<br>2001*                                  |          |
| microsatellite                                     | HTG03              | 16q13         | F: TAACCTGGGTGCAAAGCCACCCAT<br>R: TCAGGGCCAATCTTCCTCAC     | 119-129 | 2.0 | 50       | Ellegren et<br>al. 1992;<br>Godard et al.<br>2000*      | AF169164 |
| microsatellite                                     | HTG13              | 16            | F: TTAGCACGGGGAGATCGGATCCTG<br>R: GGTCTCCCTCTCCATTCACCCTGC | 120     | 2.0 | 58       | Marklund et<br>al. 1994                                 | AF169297 |
| microsatellite                                     | I-18               | 16q23-<br>q25 | F: CAACAAAGATGTTGCAAGGG<br>R: TGTGCCTCTTGTCTCTTAGG         | 113-187 | 3.0 | 58       | Marti et al.<br>1998*                                   | Y10244   |
| interferon-related<br>developmental<br>regulator 2 | IFRD2              | 16            | F: CTTCAAAGCCCGGACCAAG<br>R: CTGTTAAAAATGCGGGCAAG          | 115     | 1.5 | 55       | Perrocheau et<br>al. 2006                               | DX010513 |
| inositol<br>hexaphosphate<br>kinase 2              | IHPK2              | 16            | F: TGCTCACCTGCTCACACCT<br>R: ACACGACCTCAGACACAAGC          | 900     | 1.5 | TD<br>58 |                                                         | BM780272 |
| interleukin 17<br>receptor D                       | IL17RD             | 16            | F: ATACTGGAGGAGCTGAAGTC<br>R: GAAGGAAAAGGGACGATC           | 699     | 1.5 | TD<br>58 |                                                         | BE750478 |
| integrin, alpha 9                                  | ITGA9              | 16            | F: CCCATAATTCTCAAACCCACC<br>R: AATCGCAACAAGAAGTCTCTCC      | 500     | 1.5 | 60       |                                                         | AJ543268 |

|                                                                       |                          |                       |                                                                 |         |           |          |                            |          |
|-----------------------------------------------------------------------|--------------------------|-----------------------|-----------------------------------------------------------------|---------|-----------|----------|----------------------------|----------|
| inositol 1,4,5-<br>triphosphate<br>receptor, type 1<br>microsatellite | ITPR1                    | 16q14-<br>q15         | F: CCACAACCCACAAAACAAAC<br>R: CCTTGCCTTATCCTTCACAC              | 120     | 1.5       | 60       | Perrocheau et<br>al. 2005* |          |
|                                                                       | LEX048                   | 16                    | F: CATAGTGCCCTCAAGTTC<br>R: TGAATTGGATAAAGAAGATGTA              | 164-168 | 3.0 - 5.0 | 58       | Coogle et al.<br>1997      | AF075650 |
| microsatellite                                                        | LEX056                   | 16                    | F: GACCTACAGGCCACTCATCAA<br>R: GGCAGTTTCCTCCATCCTTA             | 213-229 | 2.0       | 58       | Coogle et al.<br>1997      | AF075658 |
| microsatellite                                                        | LEX059                   | 16                    | F: TGAAATGTACCTTCTCAGAG<br>R: ACTTCGTGGTGGACACTTGC              | 229-235 | 2.0       | 58       | Coogle et al.<br>1997      | AF075660 |
| lactotransferrin                                                      | LTF                      | 16q21.3               | F: AACCCGCTATTATGCTGTGG<br>R: GCTGGCAGAGAAGAAGTTGG              | ~400    | 2.0       | 58       | Chowdhary<br>et al. 2003*  | AJ010930 |
| microtubule-<br>associated protein<br>4                               | MAP4                     | 16                    | F: TGATAAACTGTCTCCTCTAGCC<br>R: GCTGAGTCATCAAACACAAAG           | 113     | 1.5       | 58       |                            |          |
| muscleblind-like<br>(Drosophila)                                      | MBNL1<br>( <i>MBNL</i> ) | 16                    | F: TGAACAGGCAAACCAAACAG<br>R: TGTGGGGTTGTCTGATAAGTG             | 244     | 4.0       | TD<br>60 | Chowdhary<br>et al. 2003   |          |
| microphthalmia-<br>associated<br>transcription factor                 | MITF                     | <b>16q15-<br/>q16</b> | F: AACCAACCTCGGAACCGGGACC<br>R: AGCAACAAATGCCGGTTGGC            | 292     | 1.5       | 58       | Ward et al.<br>2003        | AF401626 |
| mutL homolog 1,<br>colon cancer,<br>nonpolyposis type<br>2 (E. coli)  | MLH1                     | 16                    | F: CTGACATGCAGCAGATCAAC<br>R: TGAATGAGATTATGCTGAGCC             | 134     | 1.5       | 58       |                            |          |
| microsatellite                                                        | MPZ002                   | 16                    | F: GATCCCCCCTATTTTATATACAG<br>R: AGGTTCTCATTCTACCTACAAGG        | 77-101  | 3.0       | TD<br>60 | Breen et al.<br>1994       | Z28342   |
| microsatellite                                                        | NVHEQ216                 | 16                    | F: TTGGACTACTGTATTTGGTC<br>R: TGATCTCTCCATAGCATAAT              | 142-144 | 2.5       | 57       | Penedo et al.<br>2005      |          |
| p300/CBP-<br>associated factor                                        | PCAF                     | <b>16q22.3</b>        | F: ACAGTGAAAGTGAGCCGTAG<br>R: TAGCACAGGATAGTCAGCAG              | 184     | 1.5       | 53       |                            |          |
| programmed cell<br>death 6 interacting<br>protein                     | PDCD6IP                  | 16q21.3               | F: GAGGAATTAAACCCACAAGTGAAAT<br>R: AATTAAACCAAATCAATAAACCAAGAGA | 155     | 3.0       | 55       | Chowdhary<br>et al. 2003*  |          |
| procollagen-lysine,<br>2-oxoglutarate 5-                              | PLOD2                    | 16                    | F: TGCGATGTATCTTGTTC<br>R: GGTGAAATATTCCCCTGA                   | 408     | 2.0       | 55       |                            |          |

dioxygenase 2

|                                                          |       |                  |                                                        |       |     |    |                                                |          |
|----------------------------------------------------------|-------|------------------|--------------------------------------------------------|-------|-----|----|------------------------------------------------|----------|
| peroxisome proliferator-activated receptor gamma         | PPARG | <b>16q12-q13</b> | F: GGGTGTTCAGTTTCGCTCAGT<br>R: CACCAAAAGGCTTTCTCAGG    | 235   | 1.5 | 62 |                                                |          |
| proteasome 26S subunit, non-ATPase, 6                    | PSMD6 | <b>16q16</b>     | F: CAGATTTATTGCTGCTGGGAG<br>R: TTATACAGTTGAACTGGGCAC   | ~ 364 | 1.5 | 60 |                                                | CD535869 |
| parathyroid hormone receptor 1                           | PTHRI | 16q21.2          | F: CATTGCACACGCAATTACATC<br>R: CGGTGCCCCGAGTAGAGAAC    | 100   | 1.5 | 55 | Muller et al. 2005*;<br>Perrocheau et al. 2006 | DX010564 |
| v-raf-1 murine leukemia viral oncogene homolog 1         | RAF1  | 16               | F: AATCCTTCCTTACGAGTGCC<br>R: ATTTCTCCCTACCTCACACC     | 178   | 1.5 | 58 |                                                |          |
| retinoic acid receptor, beta                             | RARB  | <b>16q22.1</b>   | F: ATGCGAGCTGTTTGAGGACT<br>R: TTCCCAGAAAGATCCCAAGTT    | 149   | 3.0 | 58 | Chowdhary et al. 2003                          | AF134234 |
| RNA binding motif protein 5                              | RBM5  | 16               | F: CCTAAAAATTGAGAATGCGCC<br>R: AGGAAGAACTTTGCCAGTGG    | 171   | 1.5 | 60 |                                                |          |
| RNA binding motif, single stranded interacting protein 3 | RBMS3 | 16               | F: AGGTGAAAGTGGTAACAAACAG<br>R: GAGGAAACAACAAGCCAAATAG | 563   | 1.5 | 60 |                                                | AJ576782 |
| raftlin, lipid raft linker 1                             | RFTN1 | 16               | F: AAAAATAACCCCCAAGCCCC<br>R: AGTCACAAGAATCATTGAGCC    | 589   | 1.5 | 62 |                                                | AJ543037 |
| rhodopsin                                                | RHO   | <b>16q12-q13</b> | F: CACTTCACCATCCCCTTGAT<br>R: AGCTGCCTGTAGGGACACAG     | 178   | 2.0 | 58 | Chowdhary et al. 2003                          | AF130780 |
| ribosomal protein L29                                    | RPL29 | 16               | F: CACAACAAGAAGGGCCTGAAG<br>R: CTGGGCCTTGTTTGTGACTT    | 120   | 2.0 | 58 |                                                | BI961709 |
| ribosomal protein SA                                     | RPSA  | 16               | F: GACTTCTGGTGGTAAGTATCC<br>R: AGCATCCACCACATCAGACC    | 175   | 1.5 | 66 |                                                |          |

|                                                             |                   |           |                                                           |         |     |       |                        |          |
|-------------------------------------------------------------|-------------------|-----------|-----------------------------------------------------------|---------|-----|-------|------------------------|----------|
| SATB homeobox 1                                             | SATB1             | 16q22.3   | F: CATGGCAGGAGAACAGAACT<br>R: ATAACCTTCCTCGCAGAGCATT      | 202     | 1.5 | 58    | Pascual et al. 2002    | BI395227 |
| solute carrier family 6 member 20                           | SLC6A20           | 16        | F: CTGAGCGTGGACATTACAGAAG<br>R: TGTATTGGACTGTGTGCATTCC    | 88      | 1.5 | 56    |                        |          |
| solute carrier organic anion transporter family, member 2A1 | SLCO2A1 (SLC21A2) | 16        | F: AGACCCCTCCCAAAGCATAC<br>R: GCAGAGCCTTCAGAATTTGG        | 302     | 3.0 | 58    | Chowdhary et al. 2003  |          |
| sarcolemma associated protein                               | SLMAP             | 16        | F: ACTGCAGAGGTTACACATCA<br>R: TCTGTTGGTCCTCACATTGT        | 293     | 1.5 | 58    |                        |          |
| stromal antigen 1                                           | STAG1             | 16        | F: CAGTGGTGATTATCCCCTTACC<br>R: AAAAGCTCTGACCTGGGAGTC     | 181     | 1.5 | 55    | Perrocheau et al. 2006 | DX010590 |
| transferrin                                                 | TF                | 16q23     | F: CCACAAGAGGCTGACAGAGAC<br>R: AGAAGCCCCCAGATCAAGTC       | 140     | 2.0 | 58    |                        | BI395139 |
| transforming growth factor, beta receptor II                | TGFBR2            | 16q21-q22 | F: GAGCTTTATCACTCATGGGTCATC<br>R: CATGAGTACTGCGGAAGTGTTCC | 207     | 3.0 | 58    | Lear et al. 2001*      | G62195   |
| transketolase                                               | TKT               | 16        | F: AGAGCAACATCAACCTCTGC<br>R: TGGGTAAAAGACGGTTGACG        | 267     | 1.5 | 58    |                        |          |
| microsatellite                                              | TKY279            | 16        | F: AATGAATGAGACTTGAACCC<br>R: TCTGCTGTTTTAGGCTCGG         | 119-133 | 3.0 | TD 60 | Tozaki et al. 2000b    | AB033930 |
| microsatellite                                              | TKY311            | 16        | F: CAAACAGGTCGCATCATTAG<br>R: CGCATCTCTGCTTTTCAGAG        | 244-263 | 1.5 | 58    | Tozaki et al. 2000c    | AB034620 |
| microsatellite                                              | TKY341            | 16        | F: TATCCAGTCACCCATTTTAC<br>R: TTGTGTCAGTACACTCTATG        | 157-171 | 1.5 | 58    | Tozaki et al. 2001     | AB044842 |
| microsatellite                                              | TKY347            | 16        | F: TCAACATTTGCTCCAAATTCC<br>R: CCTCAGGTACATTTGATATG       | 191-199 | 1.5 | 56    | Tozaki et al. 2001     | AB044848 |
| microsatellite                                              | TKY349            | 16        | F: GATCAATCAATCAATCAATATC<br>R: TCAGTAAGTGACCAGATTCG      | 119-131 | 1.5 | 58    | Tozaki et al. 2001     | AB044850 |
| microsatellite                                              | TKY350            | 16        | F: TCCTAGGGAATTCACAGTTG<br>R: TAACAGAACTACAAGGCC          | 184-214 | 1.5 | 58    | Tozaki et al. 2001     | AB044850 |
| microsatellite                                              | TKY388            | 16        | F: TCTAAAACAAGGCACAGTGAG<br>R: TCAACACATCCTCACTGTTAG      | 185-191 | 1.5 | 54    | Tozaki et al. 2001     | AB048294 |



|                |         |    |                                                        |         |     |    |                       |          |
|----------------|---------|----|--------------------------------------------------------|---------|-----|----|-----------------------|----------|
| microsatellite | TKY406  | 16 | F: CCACTAGGGGCCAGTGATT<br>R: GAACTCCACCCTTTGGGATT      | 119-137 | 1.5 | 58 | Tozaki et al.<br>2004 | AB103624 |
| microsatellite | TKY445  | 16 | F: CCTGGGCTAATTCCCATTTT<br>R: CCAGCTCTTTGAAGGTAGCA     | 298-308 | 1.5 | 58 | Tozaki et al.<br>2004 | AB103663 |
| microsatellite | TKY532  | 16 | F: ACAAACACTCGTGGTTGCTG<br>R: TATTTTCAGCAAGGGGCAAC     | 182-201 | 1.5 | 58 | Tozaki et al.<br>2004 | AB103750 |
| microsatellite | TKY563  | 16 | F: TGCAGGATCCGAGGAGAG<br>R: AGAGTGTCCCCTCGCCTTAC       | 177-195 | 1.5 | 58 | Tozaki et al.<br>2004 | AB103781 |
| microsatellite | TKY637  | 16 | F: TCTCTGCTTTTCAGAGTCTG<br>R: AGGCTAGGTCCAAAAATCTG     | 171     | 2.0 | 58 |                       | AB103855 |
| microsatellite | TKY667  | 16 | F: GAAATGATCCCAAGGGACAC<br>R: GACAACCATGTCTTGGCAC      | 71      | 2.0 | 58 |                       | AB103885 |
| microsatellite | TKY687  | 16 | F: CAGCCTTCCATGGGAAGTAGT<br>R: GTGCTGCTGCAGTATTTTGG    | 197-227 | 1.5 | 58 | Tozaki et al.<br>2004 | AB103905 |
| microsatellite | TKY719  | 16 | F: CTCATAACTGTGTGCCAATTCC<br>R: TGGTCATCACTTTTCTGTTGAA | 159-169 | 1.5 | 58 | Tozaki et al.<br>2004 | AB103937 |
| microsatellite | TKY781  | 16 | F: GATCCAATTGGAGCCTATCA<br>R: TTTTGCAGCTTCTTAAGCCC     | 206     | 2.0 | 58 |                       | AB103999 |
| microsatellite | TKY800  | 16 | F: TAAATGTTGCTGCACTTGGG<br>R: TCTTTCTATGACGTTGGGCA     | 255     | 2.0 | 58 | Tozaki et al.<br>2004 | AB104018 |
| microsatellite | TKY802  | 16 | F: GGAGGAAAGAGCTGAATGGA<br>R: TCATCCAGTTCACCCATCAG     | 100     | 2.0 | 58 | Tozaki et al.<br>2004 | AB104020 |
| microsatellite | TKY871  | 16 | F: CACACTACTCATGAAGCCAT<br>R: ACTTGTCCCAGCACTGTTTG     | 253     | 2.0 | 58 | Tozaki et al.<br>2004 | AB104089 |
| microsatellite | TKY921  | 16 | F: TTA CTCCACTAGCACCAAAG<br>R: CATTTTAGAGAATAGGGAATC   | 86      | 2.0 | 58 |                       | AB104139 |
| microsatellite | TKY936  | 16 | F: ACCACTGTACTGAATACTGG<br>R: ACAAAGCATCTCCTCGAATAG    | 120     | 2.0 | 58 | Tozaki et al.<br>2004 | AB104154 |
| microsatellite | TKY1032 | 16 | F: CCATCGACGAATGACTAGTG<br>R: TCTCAGATGGTAGGATGTTC     | 120     | 2.0 | 58 |                       | AB104250 |
| microsatellite | TKY1066 | 16 | F: ACCTTCCAAGTGCTCAGTG<br>R: ATAGTGCTGTCCAGTAGAAC      | 114     | 2.0 | 58 |                       | AB104284 |

|                                          |           |                       |                                                      |         |     |    |                                    |          |
|------------------------------------------|-----------|-----------------------|------------------------------------------------------|---------|-----|----|------------------------------------|----------|
| microsatellite                           | TKY1069   | 16                    | F: TTTGAACCACCAACCAAAGG<br>R: CCCAAAGGGAAAGGATGATG   | 139     | 2.0 | 58 | Tozaki et al.<br>2004              | AB104287 |
| microsatellite                           | TKY1086   | 16                    | F: TATGACCTGATGGTATGTGG<br>R: GTTAGCTCAGGTGCCAATC    | 282     | 2.0 | 58 |                                    | AB104304 |
| microsatellite                           | TKY1131   | 16                    | F: TCTCCAATAGAGATAGCACC<br>R: GCAGAATAAGGTGGGATTCA   | 224     | 2.0 | 58 |                                    | AB104349 |
| microsatellite                           | TKY1149   | 16                    | F: TCTGTTTCCCACCTCACTG<br>R: ATCCCCCATCTCCCTTCT      | 280     | 2.0 | 58 |                                    | AB104367 |
| microsatellite                           | TKY1930   | <b>16q22.1</b>        | F: ATGGTGGCTTGTATTTTTCG<br>R: CCCGTTACACATTTAGGTTG   | 286     | 1.5 | 58 | Tozaki et al.<br>2007              | AB215873 |
| microsatellite                           | TKY2022   | 16                    | F: ATCTCTCAGGTGAGCCCTT<br>R: AGGAAAGTCAGGAAGGTTTC    | 198     | 1.5 | 60 | Tozaki et al.<br>2007              | AB215965 |
| microsatellite                           | TKY3372   | 16                    | F: TTGCTGGGTGCTCAAAGTAT<br>R: GGAGCTGACAAAACAGAGGA   | 153     | 1.5 | 58 | Tozaki et al.<br>2007              | AB217315 |
| transmembrane<br>protein 16K             | TMEM16K   | 16                    | F: GGAGTTATTCCTGCAGTTTGGT<br>R: GCCATACACCAATACTGGCT | 170     | 1.5 | 64 |                                    |          |
| TATA element<br>modulatory factor<br>1   | TMF1      | <b>16q15-<br/>q16</b> | F: TGGACTTGTAAGTGGTCAAA<br>R: TACACACCCAAGTTAATGAA   | 133     | 1.5 | 56 |                                    |          |
| topoisomerase<br>(DNA) II beta<br>180kDa | TOP2B     | <b>16q22.1</b>        | F: AGGTCCTCCTCATGAAGGAA<br>R: TGGAATGCCAGCACTGAGTA   | 164     | 1.5 | 56 |                                    |          |
| equine EST                               | TUDPEc039 | 16                    | F: AAGCTAACCCAGAGAACAAGG<br>R: TGTGAAGGAAATGGAAAACG  | 237     | 1.5 | 58 | Pascual et al.<br>2002             | BI395107 |
| microsatellite                           | UCDEQ505  | 16                    | F: ATCACTCTCTTGTTGAGATAAC<br>R: GGGATTTCTTCTTTCTC    | 175-197 | 4.0 | 50 | Eggleston-<br>Stott et al.<br>1997 | U67421   |
| microsatellite                           | UM042     | 16                    | F: GGCATCCCACATACAAAG<br>R: GAAGCAACAGTCAATTCAG      | 218-226 | 1.5 | 58 | George et al.<br>1998              | AF195585 |
| microsatellite                           | UMNe122   | 16                    | F: CCATGTGTTCACAACTCGG<br>R: TGGAACCTTCCAGTCCAAGG    | 100     | 1.5 | 62 | Mickelson et<br>al. 2004           | AY731378 |

|                                                       |         |    |                                                           |        |     |    |                       |          |
|-------------------------------------------------------|---------|----|-----------------------------------------------------------|--------|-----|----|-----------------------|----------|
| microsatellite                                        | UMNe213 | 16 | F: CTGAATATCCAAAGTTCTTCTGTG<br>R: GGTATACAACAAAGTACGGGGGC | 150    | 2.0 | 58 | Mickelson et al. 2003 | AF536295 |
| microsatellite                                        | UMNe264 | 16 | F: GCAATGCTAGCACAGGGG<br>R: CCTCTCTCTCTTTCCCCCTC          | 101    | 1.5 | 58 | Wagner et al. 2004a   | AY391330 |
| microsatellite                                        | UMNe277 | 16 | F: AGGCGATGGTGACATCTTTC<br>R: CTACACACGGGATAAAATTCGC      | 158    | 1.5 | 58 | Wagner et al. 2004c   | AY735240 |
| microsatellite                                        | UMNe348 | 16 | F: TCTAGTTGTAGGGAGCCTAGGG<br>R: CATATTAGAGTTGCCCAATTGC    | 150    | 2.0 | 58 |                       |          |
| microsatellite                                        | UMNe468 | 16 | F: TTCGCATAGAGCTGTTCATGG<br>R: GTTATAGCAGCCCTAATGGACG     | 247    | 1.5 | 58 |                       |          |
| microsatellite                                        | UMNe562 | 16 | F: TTGGTTTAGGTTTTTAATTACTCTG<br>R: GGTGTTGAAACAACCTGGCTG  | ~150   | 1.5 | 58 | Wagner et al. 2004b   | AY464528 |
| microsatellite                                        | UMNe566 | 16 | F: TGCTGTGACTATGCTGTGTCC<br>R: ATCAGCTGGTCAATGATGAGG      | ~250   | 1.5 | 58 | Wagner et al. 2004c   | AY735271 |
| microsatellite                                        | UMNe585 | 16 | F: ATGAGAACACTGGGTGGGAG<br>R: AAGGCCCTCAGGGAAATG          | ~400   | 1.5 | 58 | Wagner et al. 2004c   | AY735284 |
| ubiquinol-cytochrome c reductase core protein I       | UQCRC1  | 16 | F: CTGTGTGTGAGGACATTGGA<br>R: CAGACCTCACGTACCACACT        | 464    | 1.5 | 58 |                       |          |
| microsatellite                                        | VHL145  | 16 | F: GCAAGCACAATGAATACTCATG<br>R: AGTTTGGTTTCTGGAGAATTGTC   | 93-109 | 1.5 | 54 | Swinburne et al. 2005 |          |
| WD repeat domain 51A                                  | WDR51A  | 16 | F: AGCAGCCCTCTCTCCTATAC<br>R: CATTGCCACAGAGAAAGCCC        | 598    | 1.5 | 62 |                       | AJ576546 |
| wingless-type MMTV integration site family, member 5A | WNT5A   | 16 | F: CCATATTTTTCTCCTTCGCCCA<br>R: GAGCCCAAAGTCACGATTCA      | 142    | 1.5 | 60 |                       |          |

| Name                                                                              | Symbol                          | Horse chr.               | Primers                                                | Product size (bp) | MgCl <sub>2</sub> (mM) | T <sub>a</sub> | Reference                                | Accession No |
|-----------------------------------------------------------------------------------|---------------------------------|--------------------------|--------------------------------------------------------|-------------------|------------------------|----------------|------------------------------------------|--------------|
| sequence tagged site                                                              | 17STS02                         | 17                       | F: ATATCACGTCCATTTCCGTTTC<br>R: TATTGACACGTTGTTAGCTGGG | 139               | 1.5                    | 59             |                                          | CX594220     |
| sequence tagged site                                                              | 17STS03                         | 17                       | F: CCTCAGTTCCATCTGTCTCC<br>R: GGCTAGGTCCCCAAATATCC     | 314               | 1.5                    | 58             |                                          |              |
| sequence tagged site                                                              | 17STS04                         | 17                       | F: ACAACCGAGGAACGAACATC<br>R: CAGAGGGTGAGTAATCCCACA    | 175               | 2.0                    | 62             |                                          | BM414763     |
| microsatellite                                                                    | AHT102                          | 17                       | F: GGCCATACCAAGCTGGAATA<br>R: ATCCCTTCGTTTCATTCAGCA    | 273-295           | 1.5                    | 58             | Swinburne et al. 2003                    |              |
| asparagine-linked glycosylation 5 homolog (S. cerevisiae)                         | ALG5                            | 17                       | F: CCATTTTGGAGCTGGCTA<br>R: GCTAATTCACCTTTCCTGGGTTG    | 103               | 1.5                    | 62             | Lee et al. 2004                          | BI961590     |
| basic, immunoglobulin-like variable motif containing breast cancer 2, early onset | BIVM                            | <b>17q26</b>             | F: AGGGCAACTATCCATCTTTCAA<br>R: GCAACAAGAGAGGAGCTCAAAT | 132               | 1.5                    | 59             |                                          | CX596367     |
|                                                                                   | BRCA2                           | <b>17q14<sup>a</sup></b> | F: GTGACACTCCAGGTGTGGAT<br>R: GCCGATCTTCTGCTTCTATCA    | 700               | 4.0                    | 50             | Chowdhary et al. 2003                    | AF317283     |
| chromosome 13 open reading frame 24                                               | C13orf24 ( <i>PIBF1</i> )       | 17                       | F: GGGAAGTACAACCTTAGTGCAGA<br>R: CAGTGTGTGAGATTTCTTGCA | 124               | 1.5                    | 62             | Lee et al. 2004                          | BM781341     |
| chromosome 13 open reading frame 27                                               | C13orf27 ( <i>LOC93801</i> )    | 17                       | F: GATGCTGTTTGTGTTGGTACC<br>R: AGGCAGAAAAACCCATGAGA    | 134               | 1.5                    | 62             | Lee et al. 2004                          |              |
| coiled-coil domain containing 70                                                  | CCDC70 ( <i>DKFZp434K1172</i> ) | 17                       | F: GGGAAGAGATGTGGACTTTCC<br>R: TAAGGCGTTGTCCTCTTTCC    | 230               | 1.5                    | 58             | Lee et al. 2004                          |              |
| cell division cycle 16 homolog (S. cerevisiae)                                    | CDC16                           | 17q27                    | F: CTGGGATTTTCAGGGAATTTG<br>R: GTTTCTTCCAAGGAGGGTCTG   | 115               | 2.0                    | 63             | Lee et al. 2004; Perrocheau et al. 2005* | BM735064     |

|                                               |                     |                          |                                                        |           |     |    |                                                      |          |
|-----------------------------------------------|---------------------|--------------------------|--------------------------------------------------------|-----------|-----|----|------------------------------------------------------|----------|
| claudin 10                                    | CLDN10              | 17q26                    | F: GGCCACATCTGTCATGTCTT<br>R: ATTATGGGAGGGCCTTGATG     | 184       | 1.5 | 58 | Lee et al.<br>2004*                                  |          |
| ceroid-<br>lipofuscinosis,<br>neuronal 5      | CLN5                | 17                       | F: ATGTAAAAGCCAGCCCAGA<br>R: CCCAGATAAGTAGGTTCTCCA     | 172       | 1.5 | 58 | Lee et al.<br>2004                                   |          |
| component of<br>oligomeric golgi<br>complex 6 | COG6                | 17                       | F: AACTCCCACCACCTGATCTT<br>R: AGGAGAGGATCCAAGACACA     | 157       | 1.5 | 62 | Lee et al.<br>2004                                   |          |
| microsatellite                                | COR007              | 17q12-<br>q13            | F: GTGTTGGATGAAGCGAATGA<br>R: GACTTGCCTGGCTTTGAGTC     | 153 - 175 | 2.0 | 58 | Hopman et<br>al. 1999;<br>Chowdhary<br>et al. 2003*  | AF083450 |
| microsatellite                                | COR032              | 17q22dist-<br>q23        | F: GCCCTCTTAGAGCATTTTCC<br>R: CAGAGATGGCTGGAGTAAGG     | 247 - 253 | 3.0 | 58 | Murphie et<br>al. 1999;<br>Chowdhary<br>et al. 2003* | AF101401 |
| microsatellite                                | COR067              | 17                       | F: AGGCTGGGAAATGACAAATG<br>R: TGTGCCTGGAGCTGTTCTAA     | 212       | 3.0 | 58 | Chowdhary<br>et al. 2003                             | AF142604 |
| microsatellite                                | COR072              | 17q13                    | F: TTCCTCATTGCTTCCTGAGT<br>R: TCACTGGATAGTCTGCTGAGG    | 155       | 4.0 | 60 | Tallmadge<br>et al. 1999a;<br>Lee et al.<br>2004*    |          |
| microsatellite                                | COR105              | 17                       | F: TTTCTCATTGCTTCCTGAG<br>R: CCCAAGGTCTGTCTTGCTCTC     | 174 - 192 | 3.0 | 58 | Swinburne<br>et al. 2000                             |          |
| crystallin,<br>lambda 1                       | CRYL1               | 17                       | F: CGAGTGCCTTACAGTTCCTTCT<br>R: ATCATCAGGATCAAACAGGCTT | 354       | 1.5 | 59 |                                                      | CX594359 |
| cullin 4A                                     | CUL4A               | 17q27ter                 | F: GAGGACAGTGAGTTGCGAAG<br>R: GAATTTGTCTCCATCTTCCAC    | 105       | 2.0 | 60 | Lee et al.<br>2004*                                  | BM781050 |
| cysteinyl<br>leukotriene<br>receptor 2        | CYSLTR2<br>(CysLT2) | <b>17q15<sup>a</sup></b> | F: TCACAAGCACACTGCCTTTC<br>R: CTGATGCTGGTGACATGGAG     | 191       | 1.5 | 60 | Lee et al.<br>2004                                   | BI960974 |
| dachshund<br>homolog 1                        | DACH1<br>(DACH)     | 17                       | F: CCACATTTGCGCTCTATGC<br>R: CCAGGCTCAAAGAACTAGGC      | 219       | 1.5 | 65 | Lee et al.<br>2004                                   |          |
| dopachrome<br>tautomerase                     | DCT                 | 17q26                    | F: CACCGGTACCATTTGTTGTG<br>R: GCCAATGAGTCGCTAAAAGC     | 180       | 4.0 | 50 | Chowdhary<br>et al. 2003;                            |          |

|                                        |                              |                 |                                                              |     |     |    |                                                                |          |
|----------------------------------------|------------------------------|-----------------|--------------------------------------------------------------|-----|-----|----|----------------------------------------------------------------|----------|
| DAZ interacting protein 1              | DZIP1<br>( <i>KIAA0996</i> ) | 17q26           | F: CTTTGGGTTCCTGACAC<br>R: AAGGATAGAAGAGCTGGG                | 848 | 2.0 | 60 | Lee et al. 2004*<br>Chowdhary et al. 2003;<br>Lee et al. 2004* |          |
| endothelin receptor type B             | EDNRB                        | 17q23-q24       | F: TGGTGCCAATCATTTGAAGA<br>R: GTTTTGGCAAATGCCTCACT           | 197 | 2.0 | 58 | Godard et al. 2000*; Lee et al. 2004                           |          |
| EF-hand domain family, member A1       | EFHA1                        | 17              | F: CGAGTCTTCGTTGATTTCCCTTT<br>R: AGCATGCTGTGCTACTGTGTCT      | 156 | 1.5 | 59 |                                                                | CX605170 |
| ephrin-B2                              | EFNB2                        | 17q27prox       | F: AGGGGCAGAAGGAAGATAGG<br>R: ACTGAGCATTGGGACCACTT           | 169 | 1.5 | 62 | Lee et al. 2004*                                               | BM781257 |
| esterase D/formylglutathione hydrolase | ESD                          | 17              | F: GCTACCCATCTTGTGAAGTCC<br>R: GCAGCTATGAAGTTATCAGG          | 116 | 1.5 | 55 | Lee et al. 2004                                                |          |
| exosome component 8                    | EXOSC8                       | 17              | F: ATGAGCCGAGCAGTTACAAGAC<br>R: TGTTTTGAAAATGTGGTGGTTG       | 101 | 1.5 | 59 |                                                                | CX595111 |
| coagulation factor X                   | F10                          | <b>17q27ter</b> | F: GAGACCTACGACTTCGACAT<br>R: CACCTCCAGCATCTTGAG             | 198 | 1.5 | 58 | Lee et al. 2004                                                |          |
| fibroblast growth factor 14            | FGF14                        | 17              | F: GACAACAGGAATCTGGTAGAGC<br>R: GGCTTGGGTAGAAAATGAGC         | 197 | 1.5 | 63 | Lee et al. 2004                                                |          |
| hypothetical protein FLJ10154          | FLJ10154                     | 17              | F: GCGACAGCGTCAACAAAAA<br>R: CACTTCAACATGAAGCTACCA           | 160 | 1.5 | 60 | Lee et al. 2004                                                |          |
| fms-related tyrosine kinase 1          | FLT1                         | 17              | F: TCCTGGTCTTTGCCTGAAAC<br>R: AGCCAGTGTGATTTGCCTGA           | 133 | 2.0 | 62 | Lee et al. 2004                                                | BM735444 |
| glypican 5                             | GPC5                         | 17              | F: CCACCAAGTGGGAACCTT<br>R: CCTCTTGACTTCTCCACTTCC            | 113 | 2.0 | 53 | Lee et al. 2004                                                |          |
| glypican 6                             | GPC6                         | 17q25           | F: ATCGGGGCTGTGATTCTTC<br>R: TGAATCCCTTGGCACCGTA             | 115 | 2.0 | 58 | Lee et al. 2004*                                               |          |
| microsatellite                         | HMS25                        | 17q25-q26       | F: CAAACATAAAATATGCATGTCCATGT<br>R: CTTTTGGATATGTAAGGCTTGAGG | 124 | 3.0 | 58 | Godard et al. 1997;<br>Chowdhary                               | U89811   |

et al. 2003\*

|                                                        |                       |             |                                                               |     |     |    |                                             |          |
|--------------------------------------------------------|-----------------------|-------------|---------------------------------------------------------------|-----|-----|----|---------------------------------------------|----------|
| microsatellite                                         | HMS41                 | 17q21.3-q22 | F: AAAGTCTTCATTTGAAGTTTCCTAAG<br>R: GACTAAGTAGATGAGATGTGTTTGG | 113 | 3.0 | 58 | Godard et al. 1997;<br>Godard et al. 1999*  | U89812   |
| 5-hydroxytryptamine receptor 2A                        | HTR2A                 | 17q21.1     | F: GCTCTTTTCGTGGCATTTTTTC<br>R: AGAGCAACCATAGTGCAGTCA         | 628 | 1.5 | 64 | Momozawa et al. 2007;<br>Prause et al. 2006 | AB264327 |
| integrin, beta-like 1                                  | ITGBL1                | 17          | F: CGGAAATGCGTGTGAAAT<br>R: TCGTCTGTTTGACCTGTCCT              | 219 | 3.0 | 55 | Lee et al. 2004                             |          |
| integral membrane protein 2B                           | ITM2B                 | 17          | F: TCCATTGCACAGATATGGGTTA<br>R: AATAACCTTGGCATCTGCTG          | 192 | 1.5 | 62 | Lee et al. 2004                             | BM781143 |
| potassium channel tetramerisation domain containing 12 | KCTD12<br>(LOC115207) | 17          | F: TCCCACTGCACATCCTGT<br>R: CAGACTGGATCGCATGAATCT             | 295 | 1.5 | 58 | Lee et al. 2004                             | BM735319 |
| Kruppel-like factor 5                                  | KLF5                  | 17          | F: GTCCAGATAGACAAGCAGAG<br>R: CAGTAGTGGATGCGTCGTTT            | 193 | 1.5 | 62 | Lee et al. 2004                             |          |
| Kruppel-like factor 12                                 | KLF12                 | 17          | F: ACACAAACTGAGCCAGTGGA<br>R: AAGGGGCCCTGGAGTTAATA            | 216 | 1.5 | 62 | Lee et al. 2004                             |          |
| kelch-like 1 (Drosophila)                              | KLHL1                 | 17          | F: CTGAGGAGCTCCATAAAC<br>R: TGGAAGCAGTGGCAGTCTTA              | 158 | 2.0 | 58 | Lee et al. 2004                             |          |
| karyopherin alpha 3                                    | KPNA3                 | 17          | F: AACCAGCAACAAGTTCAAGCT<br>R: CCAGCCATTATCAGAATGTT           | 260 | 1.5 | 62 | Lee et al. 2004                             |          |
| lysosomal-associated membrane protein 1                | LAMP1                 | 17          | F: AGTATCAGAGCTACTGCTGGGG<br>R: TGTACACAAACAAGTGCAGACG        | 153 | 1.5 | 59 |                                             | CX594321 |
| LATS, large tumor                                      | LATS2<br>(RP11-56904) | 17q12-q13   | F: CGCTGTAAATAACGACATGG<br>R: CCGATTCCTGTGTACTGGTTT           | 121 | 1.5 | 62 | Lee et al. 2004*                            | BM414633 |

|                                                                                       |                                     |                                   |                                                        |           |     |    |                           |          |
|---------------------------------------------------------------------------------------|-------------------------------------|-----------------------------------|--------------------------------------------------------|-----------|-----|----|---------------------------|----------|
| suppressor,<br>homolog 2<br>(Drosophila)<br>lymphocyte<br>cytosolic protein<br>1      | LCP1                                | 17                                | F: CCGAAAAATTGGAGCAAGAG<br>R: GAAAACCTCTGGAACGGCTTG    | 226       | 1.5 | 58 | Lee et al.<br>2004        | BI961466 |
| microsatellite                                                                        | LEX067                              | 17                                | F: GTTGCTAAAATTGTTCCAGAC<br>R: CCAATAAAAGGAATCACTGCT   | 200       | 2.0 | 56 | Coogle et al.<br>1999     |          |
| microsatellite                                                                        | LEX076                              | 17                                | F: TTACCTCAGCCACAATCTTCTT<br>R: TTGCCAGACACAGAGAAGTG   | 222 - 226 | 2.0 | 58 | Bailey et al.<br>2000     | AF213362 |
| lipoma HMGIC<br>fusion partner                                                        | LHFP                                | 17                                | F: GGTGAAAGATGGCATCCAG<br>R: TGCACAGGATATGAGCACCT      | 172       | 1.5 | 65 | Lee et al.<br>2004        |          |
| ligase IV, DNA,<br>ATP-dependent                                                      | LIG4                                | <b>17q27</b>                      | F: GGGTGGAATGATGTCTCAT<br>R: TCTGGCTTCTCTGTTCCACA      | 211       | 1.5 | 55 | Lee et al.<br>2004        |          |
| LOC144997                                                                             | LOC144997                           | 17                                | F: CAGATGGGAAAATGCCTTGA<br>R: ACATTTTCTAAGGTATGGGC     | 104       | 2.0 | 62 | Lee et al.<br>2004        |          |
| myotubularin<br>related protein 6                                                     | MTMR6                               | 17q12-<br>q13                     | F: GGGACGGGAATCTTAATATTTG<br>R: TTCTCAGGCCATATGTGAGCAC | 190       | 3.0 | 58 | Chowdhary<br>et al. 2003* | G62207   |
| MYC binding<br>protein 2                                                              | MYCBP2                              | 17                                | F: ACGGCTTTGCAGGATGGTAG<br>R: AGCCAATGCAAGTGAAGACCC    | 138       | 2.0 | 58 |                           |          |
| neurobeachin                                                                          | NBEA                                | 17                                | F: GAATTTGGGCTCAGTCAG<br>R: CAGGAGTTGGAAGTCATT         | 278       | 2.0 | 58 | Lee et al.<br>2004        |          |
| Nedd4 family<br>interacting<br>protein 2                                              | NDFIP2<br>( <i>KIAA1165</i> )       | 17                                | F: GAATGGCAGAGTGTTTATGC<br>R: TGTCAGGTCAGAAGTCAATG     | 239       | 1.5 | 58 | Lee et al.<br>2004        |          |
| microsatellite                                                                        | NVHEQ024                            | 17                                | F: CCACTGTGGAAAAGACTGAAAG<br>R: TGTACTTCCTTGAAACCCAACA | 161 - 163 | 2.0 | 58 | Roed et al.<br>1997       | AF011405 |
| microsatellite                                                                        | NVHEQ079                            | <b>17q14-<br/>q15<sup>a</sup></b> | F: ATTGCTGTGCTGAGATGG<br>R: GCAAATTGCCTCTGTATCACAC     | 190       | 2.0 | 58 | Bjornstad et<br>al. 2000  |          |
| PAN3 polyA<br>specific<br>ribonuclease<br>subunit homolog<br>( <i>S. cerevisiae</i> ) | PAN3<br>( <i>RP11-<br/>502P18</i> ) | 17                                | F: GGGAGCCCTCTTTTCCATAG<br>R: ACGGGTTGTCTTTCTGTGC      | 160       | 1.5 | 60 | Lee et al.<br>2004        | BM734723 |



|                                                   |                                          |                       |                                                          |     |     |    |                           |          |
|---------------------------------------------------|------------------------------------------|-----------------------|----------------------------------------------------------|-----|-----|----|---------------------------|----------|
| protocadherin 9                                   | PCDH9                                    | 17q22<br>dist         | F: GCTGAACTGGAGGAGCAAAG<br>R: CACAACCCCCAACAAAGGT        | 211 | 1.5 | 58 | Lee et al.<br>2004*       |          |
| protocadherin 17                                  | PCDH17                                   | <b>17q22<br/>prox</b> | F: GGGCAAGAAGAAGAAGATCA<br>R: CGGTTTGAGATACATCACCT       | 187 | 2.0 | 62 | Lee et al.<br>2004        |          |
| phosphoglycerate<br>dehydrogenase<br>like 1       | PHGDHL1<br>( <i>LOC94902</i> )           | 17                    | F: TCTTTGTCGCCTCGCTTGTG<br>R: CTTGGACACTTGAGCCCATC       | 155 | 1.5 | 62 | Lee et al.<br>2004        | BM781094 |
| polymerase<br>(RNA) I                             | POLR1D                                   | 17                    | F: AAGCAAAGCAGAAATAAACCCA<br>R: TACAAAGGTTCTTGCAGGGATT   | 198 | 1.5 | 59 |                           | CX603903 |
| polypeptide D<br>RAN binding<br>protein 5         | RANBP5                                   | 17                    | F: CTTACGCAGTGA CT CAGTTTGG<br>R: CATAAAGGAAAACATCGGGAAA | 250 | 1.5 | 59 |                           | CX602694 |
| retinoblastoma 1                                  | RB1                                      | <b>17q15</b>          | F: CGAACGTGTGCTCAAAAGAA<br>R: AAATTGGCAGGAAAGGGATT       | 201 | 2.0 | 58 | Chowdhary<br>et al. 2003  | AF130779 |
| ring finger<br>protein 6                          | RNF6                                     | 17q13-<br>q14         | F: GTCACAACCGCTGCTTCAGT<br>R : TCCTCCCAGAGATGATCCAG      | 265 | 3.0 | 58 | Chowdhary<br>et al. 2003* |          |
| Sequence from<br>clone RP11-<br>477B16            | RP11-477B16                              | 17                    | F: TGCCATTGTTCTGACCTAG<br>R: ATCTGCCCTCCCCTGAATT         | 117 | 2.0 | 62 | Lee et al.<br>2004        |          |
| sarcoglycan,<br>gamma                             | SGCG                                     | <b>17q13</b>          | F: AGTTGGTTCAGGGA ACTTGG<br>R: GATCCGTGGAAGATGCAGTT      | 163 | 2   | 58 |                           | CX598910 |
| SLIT and<br>NTRK-like<br>family, member<br>6      | SLITRK6<br>( <i>DKFZp564O1<br/>278</i> ) | 17                    | F: CCAGATTGACCTTGAGGA<br>R: TCATCTGTCACTGTGTTCTT         | 99  | 2.0 | 55 | Lee et al.<br>2004        |          |
| spastic<br>paraplegia 20                          | SPG20                                    | <b>17q14-<br/>q15</b> | F: TCAAGAAGAAAGGGCAAAGGTA<br>R: CCCTATTTAGCAAACCTGCATC   | 158 | 1.5 | 59 |                           | CX605041 |
| START domain<br>containing 13                     | STARD13                                  | <b>17q14-<br/>q15</b> | F: AGGTCAC TCCCCAGAATGGT<br>R: GCATTTGCTTTTGCTTCCTC      | 160 | 1.5 | 61 | Lee et al.<br>2004        | BI960825 |
| TBC1 domain<br>family, member<br>4                | TBC1D4                                   | 17q23                 | F: GTCCAGGCTCCTTCATGACT<br>R: CTCTGGCTACAAATCCTAATG      | 137 | 2.0 | 65 | Lee et al.<br>2004*       |          |
| thrombospondin,<br>type I, domain<br>containing 1 | THSD1                                    | 17                    | F: AGTCAGCCTGAGACTTGACACA<br>R: TTACAAAGGGAAAGGTT CAGGA  | 210 | 1.5 | 59 |                           | CX593698 |

|                |                  |                       |                                                       |         |     |    |                          |          |
|----------------|------------------|-----------------------|-------------------------------------------------------|---------|-----|----|--------------------------|----------|
| microsatellite | TKY102<br>(RC01) | 17                    | F: ACCCTGATGGTGGTTTTTCAG<br>R: AAAGTGTTCAGGGGATTGCT   | 213     | 2.5 | 50 | Chowdhary<br>et al. 2003 | AB053341 |
| microsatellite | TKY103<br>(RC03) | 17                    | F: TAAAGTGATAGCGACCGATGG<br>R: TAGTAGCTCAGGGCCAATCTT  | 145     | 2.0 | 58 | Mashima et<br>al. 2001   | AB053342 |
| microsatellite | TKY287           | 17                    | F: ATCAGAGAACACCAAGAAGG<br>R: TCTCTGCTATAGGTAAGGTC    | 224-240 | 2.0 | 58 | Tozaki et al.<br>2000b   | AB033938 |
| microsatellite | TKY328           | 17                    | F: AATCCCTTCGTTTCATTCAGC<br>R: CTGACCCACAAATGATTTCAG  | 131-155 | 1.5 | 58 | Tozaki et al.<br>2001    | AB044829 |
| microsatellite | TKY356           | 17                    | F: TCAATCACACGAGCCAATTC<br>R: GATCATAGGATGATTAGCAC    | 157-171 | 2.0 | 55 | Tozaki et al.<br>2001    | AB044856 |
| microsatellite | TKY373           | 17                    | F: GGCCAATGATTAAGTACTC<br>R: CAGGTTGCACTAGAGTTCTC     | 166-176 | 1.5 | 58 | Tozaki et al.<br>2001    | AB044873 |
| microsatellite | TKY379           | 17                    | F: TAGCCTGACCATAATTTTGC<br>R: GAACAATGGCATCCTCAGTG    | 213-231 | 1.5 | 58 | Tozaki et al.<br>2001    | AB044879 |
| microsatellite | TKY481           | 17                    | F: TGGACTTCATCGCTATTCTG<br>R: TGGTCTACTTGCCTGTGAGG    | 160     | 2.0 | 58 |                          | AB103699 |
| microsatellite | TKY546           | 17                    | F: TAGGATGGGGCACCAAGTAG<br>R: CATTCCTAAGGGTGGAGCAC    | 244-248 | 1.5 | 55 | Tozaki et al.<br>2004    | AB103764 |
| microsatellite | TKY684           | 17                    | F: TTTGCAGGCTTTCTGTATTTTT<br>R: TTCTGTTTCGTTTTCCCTGAA | 230-246 | 1.5 | 50 | Tozaki et al.<br>2004    | AB103902 |
| microsatellite | TKY792           | 17                    | F: CAGTTCCATCCATCAGTGAC<br>R: ATTCCCAAAGGGCCTTTTTC    | 149     | 2.0 | 58 | Tozaki et al.<br>2004    | AB104010 |
| microsatellite | TKY796           | 17                    | F: GTTTACAGAGCACTGGAAGG<br>R: TAAAGGAATTTCCCAGGGC     | 100     | 2.0 | 58 | Tozaki et al.<br>2004    | AB104014 |
| microsatellite | TKY825           | 17                    | F: TTTGGAAAAGACAGAGGTGC<br>R: GGAAAAGAACCCACCCCA      | 254     | 1.5 | 62 |                          | AB104043 |
| microsatellite | TKY826           | <b>17q14-<br/>q15</b> | F: TCCATTTGAAAAGGGTCAGG<br>R: CTCTTTCCAACACTCCCTTG    | 98      | 2.0 | 58 |                          | AB104044 |
| microsatellite | TKY865           | 17                    | F: TCATAACTGCATGAGCCAAC<br>R: TTATTAACCAAAGTGCCACAG   | 202     | 2.0 | 58 |                          | AB104083 |
| microsatellite | TKY869           | 17                    | F: TTATTTATCATGGGGCTGGC<br>R: CTCCTCATAGTTCCTGAGAC    | 251     | 2.0 | 58 |                          | AB104087 |

|                |         |    |                                                         |     |     |    |                       |          |
|----------------|---------|----|---------------------------------------------------------|-----|-----|----|-----------------------|----------|
| microsatellite | TKY893  | 17 | F: GTTCTCCAGAGAAGCAGAAC<br>R: ATAACATGGACCGATTCTGTG     | 109 | 2.0 | 58 |                       | AB104111 |
| microsatellite | TKY924  | 17 | F: TTCACCTATGAGTTTGAGGTA<br>R: CGTCATAATGCAGACTCTTTG    | 168 | 2.0 | 58 | Tozaki et al.<br>2004 | AB104142 |
| microsatellite | TKY951  | 17 | F: ACGGCAAGTGAAGAGAAGC<br>R: TAGTCTATTTGGCTGCTAAAC      | 284 | 2.0 | 58 |                       | AB104169 |
| microsatellite | TKY969  | 17 | F: TCATACCAATCATACCCAGC<br>R: TTCCCCACTTCTATGCTTTC      | 242 | 2.0 | 58 |                       | AB104187 |
| microsatellite | TKY983  | 17 | F: ATCTTGTTCCCTGCTGTATC<br>R: TGAGGGGAAATACAAAGAAGG     | 154 | 2.0 | 58 |                       | AB104201 |
| microsatellite | TKY1071 | 17 | F: CAGTGCATCCTAACCAATAC<br>R: AAAATTCTTCGAAGTATTTCTTAAG | 172 | 2.0 | 58 |                       | AB104289 |
| microsatellite | TKY1102 | 17 | F: ACCTGCTATGTAGTCTGAAG<br>R: AGCTCTCAAATCCTTCATCC      | 123 | 2.0 | 58 |                       | AB104320 |
| microsatellite | TKY1128 | 17 | F: TGGACATGTCACAAGAATCC<br>R: ATGTTGGTCCTCATGCCTG       | 252 | 2.0 | 58 |                       | AB104346 |
| microsatellite | TKY1133 | 17 | F: GATCAGTAGTAAATATTTTCATC<br>R: GTGACGGAATCCCACATAC    | 111 | 2.0 | 58 |                       | AB104351 |
| microsatellite | TKY1301 | 17 | F: ACCAAAGTGACAGCACTAAG<br>R: CTCATTTGGCTTCCTTTTGTG     | 138 | 1.5 | 58 | Tozaki et al.<br>2007 | AB215244 |
| microsatellite | TKY2347 | 17 | F: CCTGCATTTACGTCTTCAGT<br>R: CCCCTCTCCCAAATTTAAAG      | 282 | 1.5 | 58 | Tozaki et al.<br>2007 | AB216290 |
| microsatellite | TKY2549 | 17 | F: ATCCATTCAACCATCAATGC<br>R: ATTTGCTGCTTCAAGTTCCA      | 203 | 1.5 | 58 | Tozaki et al.<br>2007 | AB216492 |
| microsatellite | TKY2567 | 17 | F: GATCAGACCAGTTCTGGGGG<br>R: TCCAGGGAGTTTAACTCAG       | 171 | 1.5 | 58 | Tozaki et al.<br>2007 | AB216510 |
| microsatellite | TKY2597 | 17 | F: CAGTGAGGTTCCCTTTGTGTTG<br>R: AACCCAAGCCTCAGTTCTTT    | 196 | 1.5 | 58 | Tozaki et al.<br>2007 | AB216540 |
| microsatellite | TKY2700 | 17 | F: TCCTCTGCTACCTGAATGCT<br>R: AAGTGGAATGGTGGTAACG       | 178 | 1.5 | 58 | Tozaki et al.<br>2007 | AB216643 |
| microsatellite | TKY3156 | 17 | F: CCATATGGGACTTGAGGAG<br>R: CTGGTGGGATTACAAGGAG        | 114 | 1.5 | 58 | Tozaki et al.<br>2007 | AB217099 |

|                                                                     |                                       |                       |                                                                                                                |                 |            |          |                                                                               |          |
|---------------------------------------------------------------------|---------------------------------------|-----------------------|----------------------------------------------------------------------------------------------------------------|-----------------|------------|----------|-------------------------------------------------------------------------------|----------|
| transmembrane 9<br>superfamily<br>member 2                          | TM9SF2                                | <b>17q26</b>          | F: CTAAATACACCTCTTCCCGCAC<br>R: ACCTACCGAGCCTAGAAAAATCC                                                        | 256             | 1.5        | 59       | Lee et al.<br>2004                                                            | CX600656 |
| tripartite motif-<br>containing 13<br>microsatellite                | TRIM13<br>( <i>RFP2</i> )<br>UCDEQ014 | 17<br>17q21.3         | F: GCTTGGATACCTTGGAAGT<br>R: CCTGCAAGATGGTGTGAG<br>F: GCATTTGCTCACTGGCTAC<br>R: ACTCCTCCACTCCACCTA             | 204<br>134      | 2.0<br>2.0 | 62<br>58 | Lee et al.<br>2004<br>Eggleston-<br>stott et al.<br>1996; Lee et<br>al. 2004* | U25266   |
| ubiquitin<br>carboxyl-<br>terminal esterase<br>L3<br>microsatellite | UCHL3<br>UMNe52                       | 17<br>17              | F: TGCCATAGAAGTTTGCAAGAAG<br>R: TGGTGTTTCCATTATTGACAA<br>F: TGTCTGCTGACAGATGAATGG<br>R: CATGGCTGAATAATATTCCGTG | 114<br>88 - 104 | 1.5<br>2.0 | 55<br>58 | Lee et al.<br>2004<br>Roberts et<br>al. 2000                                  | AF191690 |
| microsatellite                                                      | UMNe162/<br>246                       | 17                    | F: TGCATTCTGTGTTTCATATGGTC<br>R: ATGGAAAGGCAGGATTCATG                                                          | 123             | 2.0        | 58       | Lee et al.<br>2004                                                            | AF536271 |
| microsatellite                                                      | UMNe176                               | 17                    | F: TTTTGAGGGGTGTGTTACAGC<br>R: TTACCAGAGTTCTTACCTGGGG                                                          | 107             | 2.0        | 50       | Mickelson et<br>al. 2003                                                      | AF536275 |
| microsatellite                                                      | UMNe235                               | 17                    | F: TGAAGGCAATGACCAATATCC<br>R: CACCAACAAAAGTATCTGCCTG                                                          | 178             | 2.0        | 58       |                                                                               |          |
| microsatellite                                                      | UMNe384                               | 17                    | F: AGTCAGGAGAGACAGTGTAGGC<br>R: TCATGGAAGCATTTCCCTAG                                                           | 251             | 2.0        | 58       |                                                                               |          |
| microsatellite                                                      | UMNe521                               | 17                    | F: GTACCGAGCTCGGATCTGAG<br>R: TCTGCAGAATTCCAGCACAC                                                             | 137             | 1.5        | 62       |                                                                               | AY735258 |
| microsatellite                                                      | VHL179                                | 17                    | F: CTGTCATCCATCTGCAGTGTTT<br>R: GAATATCTGTAAACTCGTGGAGG                                                        | 110             | 1.5        | 62       | van<br>Haeringen et<br>al. 1998                                               |          |
| vacuolar protein<br>sorting 36<br>homolog (S.<br>cerevisiae)        | VPS36<br>( <i>CGI-145</i> )           | <b>17q14-<br/>q15</b> | F: TAAGCTCGTGGGAATGTCTG<br>R: TTGGGTAAAACCGCAAGC                                                               | 190             | 2.0        | 60       | Lee et al.<br>2004                                                            |          |
| WW domain<br>binding protein 4                                      | WBP4                                  | 17q21.3               | F: GGAACCTCCAAGCACTGAAAA<br>R: GATCATCACCTCGTTGCCTTA                                                           | 191             | 1.5        | 62       | Lee et al.<br>2004*                                                           | BM780424 |

|                            |                            |       |                                                     |     |     |    |                     |          |
|----------------------------|----------------------------|-------|-----------------------------------------------------|-----|-----|----|---------------------|----------|
| zinc finger,<br>MYM-type 2 | ZMYM2<br>( <i>ZNF198</i> ) | 17q12 | F: CCCAGTGTGGGTACACTGCTA<br>R: ATGCTCGTACGGGTTCTTTT | 204 | 1.5 | 61 | Lee et al.<br>2004* | BM781014 |
|----------------------------|----------------------------|-------|-----------------------------------------------------|-----|-----|----|---------------------|----------|

| Name                                           | Symbol                 | Horse chr. | Primers                                                | Product size (bp) | MgCl <sub>2</sub> (mM) | T <sub>a</sub> | Reference                                  | Accession No |
|------------------------------------------------|------------------------|------------|--------------------------------------------------------|-------------------|------------------------|----------------|--------------------------------------------|--------------|
| sequence tagged site                           | 18STS01                | 18         | F: AGAGACTGGTGGGCAAGAAA<br>R: CGTGGTCATCCATGAGAACT     | 207               | 1.5                    | 55             |                                            | DX010503     |
| ARP3 actin-related protein 3 homolog (yeast)   | ACTR3                  | 18         | F: CGGACTTTACTCAACCTATCTC<br>R: ACCACCACTCAATTCCTCAC   | ~350              | 1.5                    | 60             |                                            | BI961286     |
| activin A receptor, type I                     | ACVR1                  | 18         | F: GTGAATGACAGTAGTCACAGG<br>R: CAGGTACACAGAGATGGAAAAG  | 155               | 1.5                    | 58             | Wagner et al. 2006                         | DQ001074     |
| microsatellite                                 | AHT080                 | 18         | F: AGAACTGAGGAAAGAAGAGGGC<br>R: TCCCTGAGACTTAATTTCTCA  | 155-165           | 2.0                    | 58             | Swinburne et al. 2003                      | AJ507697     |
| microsatellite                                 | AHT115                 | 18         | F: GAACCCAAGAGGAGTCCACA<br>R: ACACACCTCAAGCAAAACACC    | 133               | 1.5                    | 58             | Wagner et al. 2006                         |              |
| aldehyde oxidase 1                             | AOX1                   | 18q26      | F: GGAAGTGTCCCCATTTGTCTC<br>R: TGCACATGCTGGATCAAAGC    | 127               | 1.5                    | 60             | Mariat et al. 2001*                        |              |
| activating transcription factor 2              | ATF2                   | 18         | F: TATCAGCAGGCAGTACCTTCAC<br>R: ACATACACACACACAAGGCCAC | 185               | 1.5                    | 58             |                                            |              |
| bromodomain adjacent to zinc finger domain, 2B | BAZ2B                  | 18         | F: TCGAGATATTGTGGAGAACTGG<br>R: CTGATGCAACCCTCCTTTCTA  | ~100              | 1.5                    | 58             |                                            | DN510366     |
| bridging integrator 1                          | BIN1                   | 18q12-q13  | F: TGGAGAGGGAGAGAGGAAC<br>R: GACACAGGCACACTCAGG        | 305               | 1.5                    | 58             | Wagner et al. 2006*                        | DQ001077     |
| basic leucine zipper and W2 domains 1          | BZW1                   | 18         | F: GTGTTTCTTAGCTCCTTGTC<br>R: CAATGTGTTTAGCCCTGATCC    | 101               | 1.5                    | 58             | Wagner et al. 2006                         | DQ001078     |
| CD28 molecule                                  | CD28                   | 18q26      | F: ACTCACTTTAAACAGACCCAAG<br>R: AATACACAGAGCACAATGGAC  | 273               | 1.5                    | 60             | Mariat et al. 2001*;<br>Wagner et al. 2006 | CD528733     |
| BAC end sequence                               | CH241-101P3 (AJ577071) | 18q25      | F: TCCGTAACATCAAATCGGAAC<br>R: GTGAATATGGAGTGAAGTGGAG  | 591               | 1.5                    | 58             | Wagner et al. 2006*                        | AJ577071     |

|                                                   |                             |       |                                                      |         |     |      |                                            |                       |
|---------------------------------------------------|-----------------------------|-------|------------------------------------------------------|---------|-----|------|--------------------------------------------|-----------------------|
| BAC end sequence                                  | CH241-111C11_SP6            | 18    | F: CAGCTCAGGCAAATCTAGG<br>R: GGAAC TTCCACATCAGC      | 198     | 1.5 | 58   |                                            | CR956033              |
| BAC end sequence                                  | CH241-111C11_T7             | 18    | F: GTAGGCAGGACCACG TTC<br>R: TTCGGGTCGTGGTATGAG      | 228     | 1.5 | 57   |                                            | CR956863              |
| cholinergic receptor, nicotinic, alpha 1          | CHRNA1 ( <i>CHRNA</i> )     | 18    | F: GGT TTGGCTTGACGAGTAGG<br>R: TGTTGATGCTTTGCACCTTC  | 205     | 3.0 | 58   | Caetano et al. 1999; Chowdhary et al. 2003 | AF130750              |
| cytoplasmic linker associated protein 1           | CLASP1                      | 18    | F: CAGACCCAATAGTAGAACATCG<br>R: GGCTCCATGGTGGAATTCA  | 300     | 1.5 | TD58 |                                            | CD464645              |
| collagen, type III, alpha 1                       | COL3A1                      | 18    | F: GACAGCCACAAAAATGGATGA<br>R: CACCTTTTACTCCAGGCTGC  | 286     | 1.5 | 58   | Wagner et al. 2006                         | DQ001081              |
| microsatellite                                    | COR096                      | 18    | F: CCCCTCTTTTGCTTGAGAAT<br>R: GCGTGTATGTGAGGATTGAAG  | 307-319 | 3.0 | 58   | Tallmadge et al. 1999b                     | AF154949              |
| chemokine (C-X-C motif) receptor 4                | CXCR4                       | 18q21 | F: GGACCATAGAAAAGGGAAGT<br>R: TACATTACAGGCGCTGCTATC  | 255     | 1.5 | 58   | Chowdhary et al. 2003*                     |                       |
| DEAD box polypeptide 18                           | DDX18                       | 18q15 | F: AAATAGGACGTAGGCCAGAG<br>R: TCCAATCACAACATCCATCAG  | 127     | 1.5 | 58   | Wagner et al. 2006*                        | DQ001087              |
| dipeptidyl-peptidase 4                            | DPP4                        | 18    | F: CTTTCCCATCACCC TTTCTGT<br>R: CCAGACTGGCACAGTTTCTG | 200     | 1.5 | 55   | Perrocheau et al. 2006                     | DX010468              |
| dynein, cytoplasmic 1, intermediate chain 2       | DYNC1I2                     | 18    | F: GTGTGGCCCTTGTATGGAAT<br>R: GCTGACAGTGGAGTTCTTTG   | 1103    | 1.5 | TD58 |                                            | CK954736              |
| eukaryotic translation elongation factor 1 beta 2 | EEF1B2                      | 18    | F: CAGATATGGCAAAGCTGG<br>R: CTCAAAAGCAGTGATCCG       | 561     | 2.0 | 58   | Wagner et al. 2006                         | BI961819              |
| erythrocyte membrane protein band 4.1 like 5      | EPB41L5                     | 18q15 | F: CCTCCAGTAATCAGACATAA<br>R: GCATATTTACACAAGCC      | 144     | 1.5 | 58   | Wagner et al. 2006*                        | DQ001101/<br>DQ001102 |
| FAST kinase domains 2                             | FASTKD2 ( <i>KIAA0971</i> ) | 18    | F: GGACAATTGCCAAAAGGATG<br>R: GCTTCACCACAGCATGAAGA   | 159     | 1.5 | 58   | Wagner et al. 2006                         |                       |

|                                             |             |       |                                                               |         |     |    |                                               |          |
|---------------------------------------------|-------------|-------|---------------------------------------------------------------|---------|-----|----|-----------------------------------------------|----------|
| frizzled-related protein                    | FRZB        | 18    | F: GGA CTAGCAAAGGAAAATTGC<br>R: AAGGATCTGTACCCAGACCAA         | 180     | 1.5 | 59 |                                               | CX603714 |
| glutamate decarboxylase 1 (brain, 67kDa)    | GAD1        | 18    | F: GAGCCATCTTGTGTAGTCTTC<br>R: ATGCATATTACTCAGTTGCCC          | 148     | 1.5 | 58 | Wagner et al. 2006                            | DQ001092 |
| grancalcin, EF-hand calcium binding protein | GCA         | 18    | F: CACAGGAAAGATGGGATTTAATG<br>R: CCATAGCAGCAATAGCTTGATTC      | 140     | 1.5 | 55 | Perrocheau et al. 2006                        | DX010631 |
| glucagon                                    | GCG         | 18q22 | F: GGGCATGAAGTTATACAGCTTG<br>R: TGAAAAGCCTGATAGAAACCTG        | 110     | 1.5 | 58 | Wagner et al. 2006*                           | AY008785 |
| growth differentiation factor 8             | GDF8 (MSTN) | 18    | F: TGA CTGTGATGAGCACTCCA<br>R: TCTGGGGTTTGCTTGGTGTA           | 190     | 2.0 | 58 | Caetano et al. 1999;<br>Chowdhary et al. 2003 | AF097584 |
| growth factor receptor-bound protein 14     | GRB14       | 18q23 | F: GGCCACAGCACATTGTTTATC<br>R: GCCGACTAACTATGGATTCTGC         | 213     | 1.5 | 58 | Wagner et al. 2006*                           | DQ001094 |
| microsatellite                              | HLM3        | 18    | F: GAAGGTAGAAAAGGAGGGCTAGAAC<br>R: TCTAGAGGACCATTCTCTGGGCTGTG | 123-131 | 2.0 | 58 | Vega-Pla et al. 1996                          | U36495   |
| microsatellite                              | HMS46       | 18    | F: GTCTCAGCCAAAAGGTATTCAAGC<br>R: TGGCACCAATATAGGTCACCTGG     | 141     | 3.0 | 58 | Godard et al. 1997                            | U89814   |
| microsatellite                              | HMS75       | 18q25 | F: CCCTATTGTTCTGGAATCG<br>R: GGAAAGTAACGTTAGAGTTTGGG          | ~150    | 1.5 | 58 | Mariat et al. 2001*                           |          |
| homeobox D10                                | HOXD10      | 18    | F: GCAACAAAAGAGCACAAATGAG<br>R: TCACTGGATGAAAGGCAAGG          | 104     | 1.5 | 58 | Wagner et al. 2006                            | DQ001096 |
| heat shock 60kDa protein 1                  | HSPD1       | 18    | F: TAACAGAGAAGCCACTCCAG<br>R: TGAGAAGATTATGCAGAGTTCC          | 249     | 1.5 | 58 | Wagner et al. 2006                            | DQ001097 |
| microsatellite                              | HTG28       | 18    | F: AATCAACTAATATTAGGCCTCCT<br>R: GAATACAGTTCTAGGGGCGT         | 180     | 3.0 | 58 | Lindgren et al. 1999                          |          |
| isocitrate dehydrogenase 1                  | IDH1        | 18    | F: GCAGTACAGATCCCAAGTTTGA<br>R: GTAGTTCTTACAGGCCCAGATG        | 120     | 1.5 | 58 |                                               | CX594417 |
| integrin, alpha 4                           | ITGA4       | 18    | F: TGAATGTTCCCTCCGAGA<br>R: AGTAGCCGAACAGGGTGTTG              | 186     | 1.5 | 55 | Perrocheau et al. 2006                        | DX010516 |
| integrin, alpha V                           | ITGAV       | 18    | F: TTGTTTTACTCCCCACC<br>R: CAGACACACAAAAAGTCTCC               | 274     | 1.5 | 58 |                                               |          |



|                                                                |        |       |                                                        |         |     |    |                                           |                  |
|----------------------------------------------------------------|--------|-------|--------------------------------------------------------|---------|-----|----|-------------------------------------------|------------------|
| kinesin family member 5C                                       | KIF5C  | 18    | F: CAGCTCAGCAGGAGATAGAG<br>R: GCCTATCCTATCCTTCTTCCTC   | 93      | 1.5 | 58 | Wagner et al. 2006                        | CD468079         |
| kynureninase                                                   | KYNU   | 18    | F: CATCCCATCAAACACTAAATAC<br>R: CACATCCACACTGCTCAC     | 155     | 1.5 | 58 | Wagner et al. 2006                        | DQ001103         |
| microsatellite                                                 | LEX016 | 18    | F: GTGGGGCCGGTATAGTGATTG<br>R: ACCCTAACTGATAACTGATAGA  | 171-185 | 2.0 | 58 | Coogle et al. 1996                        | AF075618         |
| microsatellite                                                 | LEX054 | 18    | F: TGCATGAGCCAATTCCTTAT<br>R: TGGACAGATGACAGCAGTTC     | 164-182 | 2.0 | 58 | Coogle & Bailey 1997                      | AF075656         |
| low density lipoprotein-related protein 1B                     | LRP1B  | 18    | F: CTTAGCAAGGTCACAAAAGGG<br>R: GCAGAAGGGCAAGAAATCAAC   | 126     | 1.5 | 58 | Wagner et al. 2006                        | DQ001105         |
| low density lipoprotein-related protein 2                      | LRP2   | 18    | F: CTGCAAACCTTGTTAGAGAAGA<br>R: GCCTTACCTTCAGATAGCTTCA | ~ 310   | 1.5 | 58 |                                           | DN508963         |
| minichromosome maintenance deficient 6 homolog (S. cerevisiae) | MCM6   | 18    | F: GATTGAAAGGCTCGACAGAA<br>R: CCCAGGAAGATACACACATCA    | 334     | 1.5 | 58 |                                           |                  |
| mannosyl-glycoprotein beta-1,6-N-acetylglucosaminyltransferase | MGAT5  | 18    | F: CCTTTCCTCCCTAGCGATAC<br>R: TGTCATAGCCATAGCCCCAAAAC  | 105     | 1.5 | 58 | Wagner et al. 2006                        | DQ001110         |
| myosin IB                                                      | MYO1B  | 18    | F: CCTTGAAAAGAATTTCCCTTGC<br>R: AGAAGATGAGCCACAAGACC   | 127     | 1.5 | 58 | Wagner et al. 2006                        | AK000160         |
| NADH dehydrogenase Fe-S protein 1                              | NDUFS1 | 18q26 | F: GAGACTTCTTCCAATCTGTTCC<br>R: TGATGTTATTCTCCCAGGCG   | 1161    | 1.5 | 58 | Wagner et al. 2006*                       | BI395134         |
| nebulin                                                        | NEB    | 18q21 | F: TGACGTACGTAACAGTCAACGA<br>R: CCAAATTCTGGAGGTGATCC   | 151     | 3.0 | 58 | Lear et al. 2001* ; Chowdhary et al. 2003 | AF130774, G62157 |
| nuclear factor                                                 | NFE2L2 | 18    | F: TACAGTCCAACCCATGTCACC                               | 219     | 1.5 | 55 | Perrocheau                                | DX010645         |

|                                                                    |                 |       |                                                            |         |     |      |                                           |                       |
|--------------------------------------------------------------------|-----------------|-------|------------------------------------------------------------|---------|-----|------|-------------------------------------------|-----------------------|
| (erythroid-derived 2)-like 2 N-myc interactor                      | NMI             | 18    | R: TGATCTTTTCGACAGGGAATG                                   |         |     |      | et al. 2006                               |                       |
|                                                                    |                 |       | F: CAGATCATAGCTGCCATAGAG<br>R: CATTGTGAACATGCAGCAC         | 1192    | 1.5 | TD58 |                                           | BM735031              |
| nuclear receptor subfamily 4, group A, member 2                    | NR4A2           | 18    | F: CAGCAGGAGATAGAGAGACAG<br>R: GCCTATCCTATCCTTCTTCCTC      | 88      | 1.5 | 58   |                                           |                       |
| microsatellite                                                     | NVHEQ077        | 18    | F: ATAATCTCACCGTTGCCTACTA<br>R: TTAGCTATGCTTCATATCACCC     | 134-136 | 2.0 | 58   | Bjornstad et al 1999                      | AJ245767              |
| microsatellite                                                     | NVHEQ133        | 18    | F: CTACCTCCGTCTTCTCCAAC<br>R: CAGGGGATGGTGGTCTC            | 167-191 | 2.0 | 58   | Penedo et al. 2005                        |                       |
| origin recognition complex, subunit 4-like (yeast)                 | ORC4L           | 18q22 | F: CCATACAGCTTTTAACTCAGCC<br>R: GCCAATGCTTTTCAGTAGCAC      | 154     | 1.5 | 58   | Wagner et al. 2006*                       | DQ001115              |
| pyruvate dehydrogenase kinase, isozyme 1                           | PDK1            | 18    | F: CAGTAGAAAGACTCCCCGTGT<br>R: CTGAACACCAAATCTCTTCCA       | ~200    | 1.5 | 58   |                                           | CX602628              |
| protein C                                                          | PROC            | 18q13 | F: CATCATGCACCCCAACTACA<br>R: GCGGTTTCTCTTGGTCTCAC         | 202     | 2.0 | 58   | Murakawa et al. 1994; Godard et al. 2000* | D43753                |
| PRP40 pre-mRNA processing factor 40 homolog A (S. cerevisiae)      | PRPF40A (FNBP3) | 18    | F: AAAAACGCACAGCAACTAGAC<br>R: TTGATGTCAAAAGGTTACATAGTAATG | 349     | 1.5 | 58   | Wagner et al. 2006                        | DQ001090/<br>DQ001091 |
| pleckstrin homology, Sec7 and coiled-coil domains, binding protein | PSCDBP          | 18    | F: TTGCAAGGACATCACCTGGGAG<br>R: TGTGTTGCTGAGGTTTGGGG       | 118     | 1.5 | 58   | Wagner et al. 2006                        | DQ001118              |
| proteasome, 26S subunit, non-ATPase, 14                            | PSMD14 (POH1)   | 18    | F: AGGTTGGCTTTTCTTACCAGTT<br>R: AATTTGTCCACTTTGATGTATTCT   | 427     | 1.5 | 58   |                                           |                       |

|                                                |        |       |                                                              |         |     |      |                     |                       |
|------------------------------------------------|--------|-------|--------------------------------------------------------------|---------|-----|------|---------------------|-----------------------|
| splicing factor 3b, subunit 1, 155kDa          | SF3B1  | 18    | F: CAACTTCTCCCAGACCTTTTTC<br>R: AACCCATTATGGTAAAGACAGC       | 102     | 1.5 | 58   | Wagner et al. 2006  | DQ001120              |
| microsatellite                                 | SGCV07 | 18q21 | F: GAATTTGAATGTATCTATTCTGAATG<br>R: GTGAGTTTTCAAGCTGGCATATTC | 132     | 3.0 | 58   | Godard et al. 1997* | U90589                |
| Sjogren syndrome antigen B                     | SSB    | 18    | F: TGGATTATTTTGGAGTGGAATC<br>R: ATGAAGCCAGGATGTCTCG          | 123     | 1.5 | 58   | Wagner et al. 2006  | DQ001122/<br>DQ001123 |
| sperm specific antigen 2                       | SSFA2  | 18    | F: GAATGTGTGGCAGTAGAAG<br>R: GAGGGACCAGAACATACAG             | 1502    | 1.5 | TD58 |                     | CB042018              |
| TRAF family member-associated                  | TANK   | 18    | F: GTTCTGTGTGATGATTTGGGG<br>R: CTGGGCAACAAATGTCTTAGG         | 458     | 1.5 | TD58 |                     | BI961543              |
| NFKB activator tissue factor pathway inhibitor | TFPI   | 18    | F: GCTGGAATCTGTCTGAGGTT<br>R: CAAGCGTTCCTGCATTCTTC           | ~130    | 1.5 | 58   |                     | CX604782              |
| microsatellite                                 | TKY016 | 18q26 | F: GGTTATGGTTTGGTATCTGTC<br>R: AAAACAATGGCTTCCTGGTCA         | ~120    | 2.0 | 58   | Kakoi et al. 1999   | AB048327              |
| microsatellite                                 | TKY017 | 18q26 | F: CAACTGTATGTTGACAGCACA<br>R: CGGCCATATTAGGTTTATCTG         | 127     | 2.0 | 58   | Hirota et al. 2001  | AB048328              |
| microsatellite                                 | TKY101 | 18    | F: TCTGAAATACCGTGTGCCT<br>R: TTCTGCCTCCCTCCAACCTT            | ~200    | 1.5 | 58   | Mashima et al. 1999 |                       |
| microsatellite                                 | TKY303 | 18    | F: GTAACCTGGGTGCATCTCTG<br>R: GAATAAGGATACAGCCACGC           | 127-129 | 1.5 | 58   | Tozaki et al. 2000c | AB034612              |
| microsatellite                                 | TKY322 | 18    | F: TGCAAACACTTGTGAACCTGC<br>R: AACCTAGTGTAATTGCTACC          | 203-224 | 1.5 | 58   | Tozaki et al. 2000c | AB034630              |
| microsatellite                                 | TKY407 | 18    | F: TCCTGCTGTGAGTTCCATGA<br>R: CATCTTGTGCTGGGGATCTT           | 230-232 | 1.5 | 58   | Wagner et al. 2006  | AB103625              |
| microsatellite                                 | TKY426 | 18    | F: TCCCTCCATGTCTCTTTCCTT<br>R: ATTTGAATTACCGGCGGACT          | 138-142 | 1.5 | 58   | Wagner et al. 2006  | AB103644              |
| microsatellite                                 | TKY449 | 18    | F: GAGCCAATTCCTTATAATAC<br>R: TTTAGTCACCTGGACAGATG           | 182     | 2.0 | 58   | Wagner et al. 2006  | AB103667              |
| microsatellite                                 | TKY545 | 18    | F: GCAGCTTCCCTCTGTCCAC<br>R: TGACCTACGGCTTTGGTTTT            | 130-138 | 1.5 | 58   | Tozaki et al. 2004  | AB103763              |

|                                                           |           |    |                                                        |         |     |    |                             |          |
|-----------------------------------------------------------|-----------|----|--------------------------------------------------------|---------|-----|----|-----------------------------|----------|
| microsatellite                                            | TKY589    | 18 | F: TATCCTGGATTGGGGTCTG<br>R: TGCAGGGAGGTGGAGCCG        | 115     | 2.0 | 58 | Wagner et al. 2006          | AB103807 |
| microsatellite                                            | TKY608    | 18 | F: AGCAACAGATGTTACCTCAG<br>R: AAACCTTCTCTTTTCCCCTAC    | 108     | 2.0 | 58 | Wagner et al. 2006          | AB103826 |
| microsatellite                                            | TKY692    | 18 | F: TTCCCCACTAGATCCTGACA<br>R: TGCTCTGTAATCTGGCAAGC     | 112-138 | 2.0 | 50 | Tozaki et al. 2004          | AB103910 |
| microsatellite                                            | TKY741    | 18 | F: CCTTCCTTCTCCTAACTCAGTCC<br>R: TGGAAACCAGGAATAGGTGTG | 97-115  | 1.5 | 50 | Tozaki et al. 2004          | AB103959 |
| microsatellite                                            | TKY909    | 18 | F: GAGTCACACTTCTGGGAAG<br>R: GCTACCAAACAACACTTGGT      | 188     | 2.0 | 58 | Tozaki et al. 2004          | AB104127 |
| microsatellite                                            | TKY943    | 18 | F: CACGGTTAATGAGGACCTG<br>R: TAGTGTTGCCAGAGAACTTG      | 217     | 2.0 | 58 |                             | AB104161 |
| microsatellite                                            | TKY1008   | 18 | F: GACCAGACGTTTATCCCATC<br>R: TGAAGTCCTCACTCTACTTG     | 166     | 2.0 | 58 |                             | AB104226 |
| microsatellite                                            | TKY1055   | 18 | F: AGAAGGTCATCAAACGATGC<br>R: GCTGTTGAGATATTGACAGC     | 112     | 2.0 | 58 | Wagner et al. 2006          | AB104273 |
| microsatellite                                            | TKY1260   | 18 | F: GTGCAAAATATTGCCACTGC<br>R: AAGGTTAATTGAGGCAAGGC     | 121     | 1.5 | 58 | Tozaki et al. 2007          | AB215203 |
| microsatellite                                            | TKY1913   | 18 | F: CACCTAAGTGTTGCTCAATG<br>R: CTCAAAGTCCATCCAAGTTG     | 164     | 1.5 | 58 | Tozaki et al. 2007          | AB215856 |
| tumor necrosis factor, alpha-induced protein 6 equine EST | TNFAIP6   | 18 | F: CGGTGGCATCTTTACAG<br>R: ACGCTGACCATACTTGAG          | 112     | 2.0 | 58 | Wagner et al. 2006          | BI961885 |
|                                                           | TUDPEc010 | 18 | F: CCCAAATTCACCCCGGTTCTAC<br>R: GGAGTAAGCAATGCAGAGGGT  | 242     | 2.0 | 58 | Wagner et al. 2006          | BI395085 |
| microsatellite                                            | UCDEQ136  | 18 | F: CTTTGGGCCTTTCTCCAT<br>R: CGAGCCTGGGAGTGATAC         | 111-121 | 3.0 | 58 | Eggleston-Stott et al. 1997 | U67401   |
| microsatellite                                            | UCDEQ387  | 18 | F: ACCCCCCGCCCCAGCAC<br>R: TGCCCCGTCAATTCTGC           | 78-88   | 3.0 | 58 | Eggleston-Stott et al. 1999 | U67404   |
| microsatellite                                            | UMNe50    | 18 | F: GTTGGAAGAGAACAACGAAAGG<br>R: GCTAAATTTCACTCCATCAGGG | 121-131 | 2.0 | 58 | Roberts et al. 2000         | AF191688 |

|                                      |                        |    |                                                             |       |     |    |                    |                       |
|--------------------------------------|------------------------|----|-------------------------------------------------------------|-------|-----|----|--------------------|-----------------------|
| microsatellite                       | UMNe089                | 18 | F: TCCTGTGTCCTTCTGAGATACCC<br>R: ACCAGGGAATCTTGGAGAAATG     | 174   | 1.5 | 58 | Wagner et al. 2006 | AF536245              |
| microsatellite                       | UMNe095                | 18 | F: TGTCCAAATAAATTTAGTCAAAACAG<br>R: ACCCATGATTTCATCACTGC    | 179   | 1.5 | 58 | Wagner et al. 2006 | AF536246              |
| microsatellite                       | UMNe097                | 18 | F: TGTCAGGTGGCATTCAAATC<br>R: TAACCAACAATGCCCAAGTC          | 202   | 1.5 | 58 | Wagner et al. 2006 | AY391288              |
| microsatellite                       | UMNe114                | 18 | F: AACCCAAAAAGCATTGAGAAG<br>R: TCTGCACCAGTTTTGTACGC         | 129   | 1.5 | 58 | Wagner et al. 2006 | AY391295              |
| microsatellite                       | UMNe180                | 18 | F: TGGAAAATCCTCACAACACTGC<br>R: TATATTTTCCTTTTGCCTGTGC      | 148   | 2.0 | 58 | Wagner et al. 2006 | AY391313              |
| microsatellite                       | UMNe243                | 18 | F: TCCATCTATCAGTCTACTTTCCAGC<br>R: GAACTAACACACCTCATTTTTCCC | 151   | 2.0 | 58 | Wagner et al. 2006 | AF536313              |
| microsatellite                       | UMNe263                | 18 | F: TCTCTTCCCTCTTCCCCCTC<br>R: ATAATGATATTGGCTGCCTGTG        | 165   | 2.0 | 58 | Wagner et al. 2006 | AF536322              |
| microsatellite                       | UMNe307                | 18 | F: ATTGTCCCTGCTCCATGAAG<br>R: GTCCCCATGCTCTCCATG            | 139   | 2.0 | 58 | Wagner et al. 2006 | AY731383              |
| microsatellite                       | UMNe308                | 18 | F: TCTTTGTTAAAACACGTATACCACA<br>R: TATTGTCTTGAAAGAAATCGTTGC | 162   | 2.0 | 58 | Wagner et al. 2006 | DQ013266              |
| microsatellite                       | UMNe442                | 18 | F: TACAGGTTTTCCCATGAACAC<br>R: ATGGATGGGCTTAGGAGGTC         | 170   | 1.5 | 58 | Wagner et al. 2006 | AY464487              |
| microsatellite                       | UMNe501                | 18 | F: CCCATGATTTAATTGTCTGCTG<br>R: TCCAAGTTTTTCCCGAAATG        | 296   | 1.5 | 58 | Wagner et al. 2006 | AY731404              |
| microsatellite                       | UMNe505                | 18 | F: CCAGAAAGGCTGTGTTCTTACC<br>R: TGCTGCTTTGAGAATTGTGG        | ~250  | 1.5 | 58 | Wagner et al. 2006 | AY464509              |
| WD repeat domain 12                  | WDR12                  | 18 | F: GCTGTCCCTAACGTCACATAC<br>R: TGTATCCCACAGTTTGACCAT        | ~ 200 | 1.5 | 63 |                    |                       |
| zinc finger E-box binding homeobox 2 | ZEB2 ( <i>ZFHX1B</i> ) | 18 | F: GAATTCACAGCGGTGAGTAG<br>R: TTGGTAGTACCACAGGTCTC          | 181   | 1.5 | 58 | Wagner et al. 2006 | DQ001126/<br>DQ001127 |

| Name                                         | Symbol  | Horse chr. | Primers                                                    | Product size (bp) | MgCl <sub>2</sub> (mM) | T <sub>a</sub> | Reference              | Accession No |
|----------------------------------------------|---------|------------|------------------------------------------------------------|-------------------|------------------------|----------------|------------------------|--------------|
| sequence tagged site                         | 19STS01 | 19         | F: GCACAGCGTACTTAAGGTAGT<br>R: GCTAAGAGCACAGTATGTCA        | 467               | 1.5                    | 62             |                        | BM780472     |
| ATP-binding cassette, sub-family C, member 5 | ABCC5   | 19         | F: ATTGTATTTATTCCATATTCATGTAA<br>R: CTGTTATTAGCACAGTGCTTAT | 218               | 1.5                    | 54             |                        |              |
| ATP-binding cassette, sub-family F, member 3 | ABCF3   | 19         | F: AGAAGCTAGAGAAGGCTGAG<br>R: TGGCTGGCTGATGCCTCTT          | 269               | 1.5                    | 58             |                        |              |
| abhydrolase domain containing 10             | ABHD10  | 19         | F: CTTTCCTTAGTCGACCAGAC<br>R: ACTCCTCAATTGCCAATGCT         | 129               | 1.5                    | 58             |                        |              |
| alpha-2-HS-glycoprotein                      | AHSG    | 19         | F: GCTGACAAAGCAAGTTCTCC<br>R: GGTCCCTCAGGCACTTTG           | 260               | 1.5                    | 58             |                        | BM780497     |
| microsatellite                               | AHT041  | 19q13      | F: CGGAGGACAACTTCCTCTG<br>R: GTCCTTGAAGAAGCCTGTGC          | 243-255           | 2.0                    | 58             | Swinburne et al. 2000* | AJ271526     |
| microsatellite                               | AHT052  | 19         | F: AGTGGAACCTCCTGTTTTTCCTG<br>R: GATCCTGGGCAATGAGGC        | 252-254           | 2.0                    | 58             | Swinburne et al. 2003  | AJ507669     |
| microsatellite                               | AHT055  | 19         | F: GGGAGATATTTCTTGGCTTGC<br>R: AATACACCCAGCTACGCACA        | 156               | 2.0                    | 58             | Swinburne et al. 2003  | AJ507672     |
| microsatellite                               | AHT094  | 19         | F: CACCTCCATCACATTGGTCA<br>R: GGCTGGAGTCAGCTGACATT         | 232-240           | 2.0                    | 58             | Swinburne et al. 2003  | AJ507711     |
| microsatellite                               | AHT106  | 19         | F: GAAACGATGCCCTCGTTCTA<br>R: GCATCAGGTACCAGGAAGGA         | 197-213           | 1.5                    | 60             | Swinburne et al. 2003  |              |
| microsatellite                               | ASB07   | 19q14-q16  | F: CTGGAAATTACAGTGGTCTTCTGG<br>R: AGGTTTTTCAGGGGCTTGCGAAGC | 153               | 2.0                    | 58             | Breen et al. 1997*     | X95322       |
| microsatellite                               | ASB11   | 19q21-q22  | F: CCACCTATGTGTTTCAGTTCACC<br>R: GCACCAATGTTTATAGACTCCC    | 139               | 2.0                    | 58             | Breen et al. 1997*     | X95326       |

|                                                        |                 |           |                                                        |         |     |    |                                      |          |
|--------------------------------------------------------|-----------------|-----------|--------------------------------------------------------|---------|-----|----|--------------------------------------|----------|
| microsatellite                                         | ASB25           | 19q21-q23 | F: GGAAACATTGGTACAGAGGC<br>R: TGAACCCAACCTTCCTGCTCC    | 70-94   | 2.0 | 55 | Irwin et al. 1998, Lear et al. 1999* | X93539   |
| ATPase, H+ transporting, lysosomal 70kDa, V1 subunit A | ATP6V1A         | 19        | F: GCCTCTTCTATTTCGTTCTTCAC<br>R: GGTTTGTGTCTGCTGTTCTG  | 355     | 1.5 | 54 |                                      | BM781440 |
| beta-1,3-N-acetylgalactosaminyltransferase 1           | B3GALNT1        | 19        | F: CACTTCACACTTCGAGAGC<br>R: GCATAACCTGCCAAAATGT       | 781     | 1.5 | 58 |                                      | AY253340 |
| butyrylcholinesterase                                  | BCHE            | 19        | F: TTCTCTTGCGATTTCTTCTGC<br>R: GTCAAGGATTGTGGCTTTTTG   | 199     | 1.5 | 55 | Perrocheau et al. 2006               | DX010614 |
| B-cell CLL/lymphoma 6                                  | BCL6            | 19        | F: ACAAATGCGAAACCTGCGGA<br>R: CCACAGATTTACAGGGATAG     | 523     | 1.5 | 58 |                                      |          |
| calcium-sensing receptor                               | CASR            | 19q21-q22 | F: GGCACAATTGGATTTGCTTT<br>R: CTCCCAGGTGAGCAGGTATAG    | 377     | 1.5 | 58 |                                      |          |
| coiled-coil domain containing 80                       | CCDC80          | 19        | F: AAGACGTACCAGCCCATTG<br>R: GCCTGCATACTCATCTTCTG      | 233     | 1.5 | 58 |                                      | CB441880 |
| BAC end sequence                                       | CH241-100C11_T7 | 19        | F: GTCTGACCTCCATTTTTGTCTG<br>R: CCATCTTCAAAGAGCATCTCAC | 651     | 1.5 | 58 |                                      | AJ542754 |
| BAC end sequence                                       | CH241-100N17_T7 | 19        | F: CAAATTTTCCCTCTCCTTACCC<br>R: TGCTGATAGCCTTGAACAAAC  | 533     | 1.5 | 56 |                                      | AJ543204 |
| microsatellite                                         | COR044          | 19        | F: CTGAGGCTCTCAGGAACAAG<br>R: GTTGATGGAAAGGCCTACAA     | 152-190 | 2.0 | 58 | Ruth et al. 1999                     | AF108361 |
| microsatellite                                         | COR092          | 19        | F: GGCAAGAGCCAGGTATTTTC<br>R: ACTGCTTGGACGAAACTGAG     | 183-199 | 3.0 | 55 | Tallmadge et al. 1999b               | AF154945 |
| coproporphyrinogen oxidase                             | CPOX            | 19        | F: AAGTTTGGCCTCTTCACTCC<br>R: AGTTCTCTGAGGGTGAATGC     | 736     | 1.5 | 58 |                                      | CK949021 |
| discoidin, CUB and LCCL domain containing 2            | DCBLD2          | 19        | F: CTGTCTGCTTCCTTTTGCTG<br>R: TCCCTTACTGATGACGACAC     | 450     | 1.5 | 58 |                                      | BM781107 |
| Filamin A interacting protein 1-like                   | FILIP1L (DOC1)  | 19        | F: AAATCACAAGTCCGACCACAG<br>R: CAAAGGTTGCCATGGTAATTG   | 192     | 1.5 | 55 | Perrocheau et al. 2006               | DX010465 |
| fragile X mental                                       | FXR1            | 19        | F: ACAGTGGATGTTCTGAGGA                                 | 340     | 1.5 | 58 |                                      |          |

|                                                   |               |    |                                                            |         |     |    |                            |          |
|---------------------------------------------------|---------------|----|------------------------------------------------------------|---------|-----|----|----------------------------|----------|
| retardation,<br>autosomal homolog<br>1            |               |    | R: ACTGTGTGGTTTCTGGATGG                                    |         |     |    |                            |          |
| hairy and enhancer<br>of split 1,<br>(Drosophila) | HES1          | 19 | F: AGCCTATCATGGAGAAAAGAC<br>R: TGTCATTTCAGAAATGTCCG        | 385     | 1.5 | 60 |                            |          |
| microsatellite                                    | HMS08         | 19 | F: GGTGAGGAATTATCTCTTTGAAGG<br>R: GCAGGTAGGATTGGATAGGTACAT | 207-215 | 2.0 | 58 | Guérin et al.<br>1994      | X74637   |
| HRAS-like<br>suppressor                           | HRASLS        | 19 | F: GTATTCAGCAGAAAGGCCCT<br>R: CCTTCTCCATAGCGAAGCAAA        | 218     | 1.5 | 60 |                            |          |
| histidine-rich<br>glycoprotein                    | HRG           | 19 | F: TCCAGGTAAACGACACTTTCC<br>R: ACATTGGTCAGAGGCTGATTG       | 187     | 1.5 | 55 | Perrocheau<br>et al. 2006  | DX010508 |
| microsatellite                                    | HTG23         | 19 | F: GTCCTTCAGAGTTGTCCCTG<br>R: GGAGAACAACCTTGCCTGAG         | 191-199 | 2.0 | 58 | Lindgren<br>2000           |          |
| microsatellite                                    | HTG24         | 19 | F: CTCAGGGCTAATCTTCCTCA<br>R: TGTAATTTCTCCTATGGAAGCA       | 180     | 2.0 | 60 | Lindgren<br>2000           |          |
| interleukin 1<br>receptor accessory<br>protein    | IL1RAP        | 19 | F: CGATGACTGGGGACTAGATA<br>R: CTCCTTACTAATGCGGTTCT         | 214     | 1.5 | 62 |                            | CB446872 |
| IQ motif<br>containing G                          | IQCG          | 19 | F: TGAGGAGAAGCTAGAGTTCTGGA<br>R: GCAAGTTCTTGAAGGTGTGCT     | 120     | 1.5 | 55 | Perrocheau<br>et al. 2005  | AY817463 |
| kininogen 1                                       | KNG1<br>(KNG) | 19 | F: ACCTAAGGCCCTGCGAGTATGT<br>R: AGACAGAACTTTATTTACCCAGCAA  | 226     | 4.0 | 58 | Milenkovic<br>et al. 2002* |          |
| lysosomal-<br>associated<br>membrane protein<br>3 | LAMP3         | 19 | F: GTATAGGCTGATGAGGTGGTG<br>R: CCCTGGTAACTACAAACAGCA       | 178     | 1.5 | 58 | Pascual et<br>al. 2002     | BI395182 |
| microsatellite                                    | LEX035        | 19 | F: CCCAGCATATCAAAGATGTT<br>R: GCTCAGTGACTTCAAGCAG          | 247-275 | 3.0 | 58 | Coogle et al.<br>1997      | AF075637 |
| microsatellite                                    | LEX036        | 19 | F: CCCAGCCTCTTCAATATCCA<br>R: CCCTAAGGGGATTTAGCAGTT        | 190     | 3.0 | 58 | Coogle et al.<br>1997      | AF075638 |
| microsatellite                                    | LEX040        | 19 | F: TTTGGCCGTTAGTCGTGT<br>R: GACAAATCGGAAAGTTGGAA           | 130-136 | 4.0 | 50 | Coogle et al.<br>1997      | AF075642 |



|                                                     |          |       |                                                           |         |     |    |                                           |          |
|-----------------------------------------------------|----------|-------|-----------------------------------------------------------|---------|-----|----|-------------------------------------------|----------|
| microsatellite                                      | LEX073   | 19    | F: CCAGCCATCCACTGGTAGAG<br>R: GGGAAAAGGGGAACCTTCTA        | 218     | 2.0 | 58 | Bailey et al. 1999                        | AF213359 |
| microsatellite                                      | MPZ003   | 19    | F: CCTAGAGTCCATCCTTGCATC<br>R: TTGTGGGAGCTGTTTTCTTCTTGG   | 170     | 2.0 | 58 | Breen et al. 1994                         | Z29484   |
| myoneurin                                           | MYNN     | 19    | F: AGGAAGCATAGTGGAGAGAAGC<br>R: TAGAGACAGCAAATGCCTTCC     | 148     | 1.5 | 55 | Perrocheau et al. 2006                    | DX010532 |
| N-acetylated alpha-linked acidic dipeptidase-like 2 | NAALADL2 | 19    | F: CATCATCAAACAAAAAGCAGC<br>R: CTGTCTCACCAACAGAGAAAC      | 299     | 1.5 | 60 |                                           | AJ542929 |
| microsatellite                                      | NVHEQ011 | 19    | F: GGCCCCACCCACTAAATATCACTG<br>R: CGGGGTCTTGGAATTTATGAAGG | 118-128 | 2.0 | 58 | Røed et al. 1997                          | AF011403 |
| poly (ADP-ribose) polymerase family, member 15      | PARP15   | 19    | F: CCACATGGACACCAAGAATG<br>R: CCACAAATAGCTTTGGATGC        | ~200    | 1.5 | 62 |                                           | BI961550 |
| protein S (alpha)                                   | PROS1    | 19q25 | F: TCGGATAVAGGCCHTAAGTCT<br>R: CTGGAAGGCCACCCAGGTAWG      | 208     | 1.5 | 62 | Milenkovic et al. 2002*; Ward et al. 2003 | AY301023 |
| schwannomin interacting protein 1                   | SCHIP1   | 19    | F: CTGATAGAGACACTACTGAAG<br>R: CTACTTGCATTTTGGCCATTG      | 132     | 1.5 | 60 |                                           |          |
| sorting nexin 4                                     | SNX4     | 19q21 | F: CTTAACCTCAGTGATGAGCC<br>R: GTGCTTGGCTTCTGAACATA        | 200     | 1.5 | 56 |                                           |          |
| TBC1 domain family, member 23                       | TBC1D23  | 19    | F: GAGAAGGCAGCAGAATTACTTT<br>R: CAGTTGTATAAATCGCTGCGT     | 152     | 1.5 | 58 |                                           |          |
| transducin (beta)-like 1X-linked receptor 1         | TBL1XR1  | 19    | F: TTTCTGGATGATAGAAATCAATGC<br>R: TCATTCAGCGTTTACCTTTGG   | 100     | 1.5 | 55 | Perrocheau et al. 2006                    | DX010593 |
| microsatellite                                      | TKY004   | 19q21 | F: TCTGTGTATGTGAGTGTATA<br>R: GATCGAGGTATTCCTGAGTG        | 87      | 2.0 | 55 | Hirota et al. 1997, Hirota et al. 2001*   | AB048315 |
| microsatellite                                      | TKY009   | 19q23 | F: CAGTGATTTTCTCTCCTCC<br>R: AAAATGCTGACCTGTAGGCA         | 103     | 2.0 | 58 | Hirota et al. 1997, Hirota et al. 2001*   | AB048320 |

|                |        |    |                                                          |         |     |    |                       |          |
|----------------|--------|----|----------------------------------------------------------|---------|-----|----|-----------------------|----------|
| microsatellite | TKY372 | 19 | F: CATCTAACTCCATTTCCCAG<br>R: TATCTAAAGCCCCATGCTAG       | 142-154 | 1.5 | 54 | Tozaki et al,<br>2001 |          |
| microsatellite | TKY419 | 19 | F: CTGGAACCAAAATGGGTCACG<br>R: AATGACACTCGTGAGGTGAG      | 258     | 2.0 | 58 |                       | AB103637 |
| microsatellite | TKY422 | 19 | F: CAAATCTTCAGACTCTTTAGTCCTTG<br>R: GACTGCAGCCCTAACCTCAC | 234-256 | 1.5 | 58 | Tozaki et al.<br>2004 | AB103640 |
| microsatellite | TKY444 | 19 | F: TCCTCAGCCCATTCAAATCT<br>R: ATCAACCCACTGGCCAATAA       | 134-152 | 1.5 | 58 | Tozaki et al.<br>2004 |          |
| microsatellite | TKY448 | 19 | F: TTCTTTTGCTCTCCCTCTCG<br>R: GGAAAGACAGAGTAAGTGCGTGT    | 140-162 | 1.5 | 58 | Tozaki et al.<br>2004 | AB103666 |
| microsatellite | TKY510 | 19 | F: AAAGAATGGAGGATTGGCAG<br>R: AGGAGGGGAAGTGTTTATTC       | 170     | 2.0 | 58 |                       | AB103728 |
| microsatellite | TKY538 | 19 | F: TGGATGGAAGGGAAACAAGA<br>R: TTGAAGAGGGTGGAGCAAAT       | 151-165 | 1.5 | 58 | Tozaki et al.<br>2004 | AB103756 |
| microsatellite | TKY606 | 19 | F: ACATGCCAACTCACCACTG<br>R: TTCATCCTACGAGGGCTCAG        | 108-114 | 1.5 | 58 | Tozaki et al.<br>2004 |          |
| microsatellite | TKY679 | 19 | F: GCATATTCCAAATAACGGTG<br>R: AGAGCCACTTTATCAGTTG        | 179     | 2.0 | 58 |                       | AB103897 |
| microsatellite | TKY686 | 19 | F: TTGATCCAGCCCCTTCATAG<br>R: TTGGGTCTCCGTGTTACTCC       | 284-286 | 1.5 | 58 | Tozaki et al.<br>2004 |          |
| microsatellite | TKY713 | 19 | F: TATCTTCCTTCCCTGAGTAG<br>R: CCCAAGGCTAACTTACTTAG       | 112     | 2.0 | 58 |                       | AB103931 |
| microsatellite | TKY730 | 19 | F: CTCCTTGAGTAACAGTCAC<br>R: GACCTTATCAGTGCCCTTG         | 278     | 2.0 | 58 |                       | AB103948 |
| microsatellite | TKY738 | 19 | F: CCCGCAAATACACCACTGT<br>R: GGGTCCTTTCAGCCTCATCT        | 209-223 | 1.5 | 58 | Tozaki et al.<br>2004 |          |
| microsatellite | TKY783 | 19 | F: TAGACAACTGACCAGTGCAA<br>R: CTGGTTGCTCCTGTCTTAAA       | 149     | 2.0 | 58 | Tozaki et al.<br>2004 | AB104001 |
| microsatellite | TKY817 | 19 | F: TATAAACAAGGGCAGAGCGA<br>R: GAGTGAATTCCCTGCTTCTC       | 155     | 2.0 | 58 | Tozaki et al.<br>2004 | AB104035 |
| microsatellite | TKY992 | 19 | F: TCTGAACTGTTGGCTTACTC<br>R: TAGCTAGTATGTGGCAGAAC       | 101     | 2.0 | 58 |                       | AB104210 |

|                            |         |               |                                                        |     |     |    |                        |          |
|----------------------------|---------|---------------|--------------------------------------------------------|-----|-----|----|------------------------|----------|
| microsatellite             | TKY1038 | 19            | F: GGCAGTCTTGCATTCTCTG<br>R: TTTCTGGGTGTAGAACCAAG      | 249 | 2.0 | 58 |                        | AB104256 |
| microsatellite             | TKY1132 | 19            | F: CCTCTCAAACTCGGTGTC<br>R: GTTTCCCCTTAACTCCATAC       | 259 | 2.0 | 58 |                        | AB104350 |
| translocation<br>protein 1 | TLOC1   | 19            | F: TGGAAGGTGATGGCTCTTCT<br>R: TGTGCCTCCTGGTCTGATAA     | 388 | 2.0 | 55 |                        |          |
| microsatellite             | UMNe071 | 19            | F: GGAAATTTGGGAGACAGTATGC<br>R: GGCAGAATTGTGACTAGAACCC | 142 | 1.5 | 58 |                        | AF191704 |
| microsatellite             | UMNe083 | 19            | F: AGCTCCTGAAAGAAGAGAGCC<br>R: TGGAACCCAGTAACATGAAGC   | 300 | 1.5 | 58 | Wagner et<br>al. 2004c | AY735234 |
| microsatellite             | UMNe098 | 19            | F: AGGGGAAATTTGGGAGACAG<br>R: AAGCGTACAGCCAGTTTTGG     | 165 | 1.5 | 58 |                        |          |
| microsatellite             | UMNe106 | 19            | F: AATCCTGTGAGGCAGGAGTG<br>R: TGTCTGGGCATCTCTTAGGG     | 200 | 1.5 | 58 | Wagner et<br>al. 2004a | AY391292 |
| microsatellite             | UMNe221 | 19            | F: AGACCTTGAGAAGCTCTTGCC<br>R: CCCTAGAGTCCCATCCTTGC    | 188 | 2.0 | 58 | Wagner et<br>al. 2004c | AY735239 |
| microsatellite             | UMNe319 | 19            | F: TTCGTGCAATCTGTTGCTTC<br>R: GATCACAGTCCCTGGTACTGG    | 154 | 2.0 | 58 | Wagner et<br>al. 2004a | AY391337 |
| microsatellite             | UMNe324 | 19q24-<br>q25 | F: TTCCTCAGCAAGAAGAGGGA<br>R: TTCAAAGTCCTTATGAGAATTCCC | 143 | 2.0 | 58 |                        |          |
| microsatellite             | UMNe325 | 19            | F: GCGAGGTAGGAGTTCTCCG<br>R: GATCCAGCCGTGTTTTGG        | 192 | 2.0 | 60 |                        |          |
| microsatellite             | UMNe351 | 19            | F: TGAGAAGCTCTTGCCAATCC<br>R: TAGAGGCCATTTTTGCATCC     | 150 | 2.0 | 58 | Wagner et<br>al. 2004a | AY391344 |
| microsatellite             | UMNe440 | 19            | F: CCTTCATGGAAGTACAATCTG<br>R: GCCAACCTGAAAGGAGGAG     | 387 | 1.5 | 58 | Wagner et<br>al. 2004b | AY464486 |

|                                                |         |              |                                                            |     |     |       |                               |                     |
|------------------------------------------------|---------|--------------|------------------------------------------------------------|-----|-----|-------|-------------------------------|---------------------|
| microsatellite                                 | UMNe500 | 19           | F: CAGCCATCATGGACAATGAG<br>R: CAAGTCTGGTTCCTTTTGTGC        | 300 | 1.5 | 55    | Wagner et al. 2004b           | AY464508            |
| microsatellite                                 | UMNe590 | 19           | F: GGGAGATATTTCTTGGCTTGC<br>R: TGAAAATACACCCAGCTACGC       | 156 | 1.5 | 58    | Wagner et al. 2004c           | AY735286            |
| microsatellite                                 | UMNe592 | 19           | F: TCCAAACTGTGTGTGTGTTTGT<br>R: TGCACATAGAACAGGGCAAG       | 163 | 1.5 | 58    | Wagner et al. 2004c           | AY735288            |
| microsatellite                                 | UMNe599 | 19           | F: AGTCCATCCTTGCATCCAAG<br>R: AGACCTTGAGAAGCTCTTGCC        | 184 | 1.5 | 58    | Wagner et al. 2004c           | AY735291            |
| uridine<br>monophosphate<br>synthetase         | UMPS    | <b>19q21</b> | F: CTAAACGGCTTATAGAAGGGG<br>R: CTTACAGAAGGGAGAGAATC        | 300 | 2.0 | 50    |                               |                     |
| microsatellite                                 | VHL011  | 19           | F: CGGCACCAGGTCATCACCACG<br>R: GAGTCGGGGCTTTGTTTGACAG      | 110 | 1.5 | 62    | van Haeringen et al. 1998     |                     |
| zinc finger and<br>BTB domain<br>containing 11 | ZBTB11  | 19           | F: GGAGATGCCACATTTCTCTCCTC<br>R: AATTGTAGGTCAGCCACACAGCTAC | 316 | 4.0 | 60    | Chowdhary et al. 2003         |                     |
| zinc finger, matrin<br>type 3                  | ZMAT3   | 19           | F: CATCTGTGTATGCTGTTGGGGC<br>R: TGAGCCATCAACATAAGCAGGG     | 211 | 3.0 | 55    |                               | AF201736,<br>G62159 |
| zinc finger protein<br>148                     | ZNF148  | 19           | F: ATGGAAAGGCATAAGAGAACC<br>R: ATACACGATCTGTTCTGGAAA       | 290 | 1.5 | 58    |                               |                     |
| microsatellite                                 | ZuBeEq9 | 19           | F: CCATAATTCTTTCCCTCCA<br>R: TCTGAGTGCCACAGCAAGTC          | 224 | 1.5 | 63-55 | Klukowska-Rotzler et al. 2006 | CR957324            |

| Name                               | Symbol           | Horse chr.         | Primers                                                | Product size (bp) | MgCl <sub>2</sub> (mM) | T <sub>a</sub> | Reference              | Accession No |
|------------------------------------|------------------|--------------------|--------------------------------------------------------|-------------------|------------------------|----------------|------------------------|--------------|
| sequence tagged site               | 20STS01          | 20                 | F: GAGGCAGCTGTGTTTCCTCAT<br>R: AAAAGCAGGCAGTGGAAAGA    | 110               | 1.5                    | 60             |                        |              |
| activator of basal transcription 1 | ABT1             | 20                 | F: ATCTTGCCCTTTGAGCGTCAG<br>R: CAAAGGCCCAAGAGCTATCC    | 159               | 1.5                    | 58             |                        |              |
| microsatellite                     | AHT018           | 20                 | F: TTTTCCAGTGACTCTGAGTGTG<br>R: GTTGTGGGAAAAGTCTGCTGGC | 168-178           | 2.0                    | 58             | Swinburne et al. 1997  |              |
| microsatellite                     | AHT109           | 20                 | F: AGCAGAGCTAAAAATGAGGCC<br>R: TTGGCTGAGTTTTTGTCTTTTG  | 163-187           | 1.5                    | 56             | Swinburne et al. 2003  |              |
| microsatellite                     | AHT111           | 20                 | F: CAGCCCATGGATAGCCAG<br>R: TGCTGCAAGATAAATGCCTG       | 268               | 1.5                    | 61             |                        |              |
| HLA-B associated transcript 3      | BAT3             | 20                 | F: AGAGTCAAACATCATTAAGCTGG<br>R: TGGCAAAGAGACCAACAAAG  | 129               | 1.5                    | 58             |                        |              |
| bone morphogenetic protein 6       | BMP6             | 20q14 <sup>a</sup> | F: CAGAGATGGCCCTTATGACAA<br>R: GATTGCGACTCTGCTGTCTG    | 116               | 1.5                    | 55             | Perrocheau et al. 2006 | DX010441     |
| biphenyl hydrolase-like            | BPHL             | 20                 | F: GATTTTGGACCCCAGATTAAG<br>R: CATCCTTTGCATCCCTTTC     | 136               | 1.5                    | 59             |                        |              |
| chromosome 6 open reading frame 62 | C6orf62          | 20                 | F: GATCTCTTTCCCCAAGTTG<br>R: CTATCATGGTTTCTGCAGC       | 146               | 1.5                    | 58             |                        |              |
| cyclin D3                          | CCND3            | 20                 | F: TTCCTCTTTGCTTTGCTTTCC<br>R: TCATCCCTGTTTCATCCCCC    | 293               | 1.5                    | 58             |                        |              |
| BAC end sequence                   | CH241-100D3_SP6  | 20                 | F: CTGGTGCCAGTTTGTTTG<br>R: ACACAGAAGGAGGGCTTG         | 256               | 1.5                    | 58             |                        | AJ542823     |
| BAC end sequence                   | CH241-100D3_T7   | 20                 | F: GCCTTTCAAGTCCTCTGG<br>R: TGGCAGCAGTTAGCTCAG         | 208               | 1.5                    | 60             |                        | AJ542824     |
| BAC end sequence                   | CH241-100F12_SP6 | 20                 | F: AGAACTTCCCAGCCATTG<br>R: CAGGTGGGTGTCAGAATG         | 287               | 1.5                    | 61             |                        | AJ542881     |
| BAC end sequence                   | CH241-100H23_T7  | 20                 | F: TTTCTGACTGCCTACAGAGC<br>R: AAGGCAGAACACTCTGAAAGTC   | 172               | 1.5                    | 60             |                        | AJ542975     |
| BAC end sequence                   | CH241-101E21_T7  | 20                 | F: CACGCTCAACAGAGAAGCAG<br>R: TCAGGCCCATCGTTTCTTAC     | 218               | 1.5                    | 60             |                        | AJ576619     |
| BAC end sequence                   | CH241-101H13_SP6 | 20                 | F: GATGGAGCTCTGGAAGCAAC<br>R: GAAATGACCATGGGAAATGG     | 227               | 1.5                    | 60             |                        | AJ576722     |
| BAC end sequence                   | CH241-101K12_T7  | 20                 | F: CCCAACAGAGCTGGAATTTG<br>R: ATCACTCCGACTGGGTTGTC     | 162               | 1.5                    | 60             |                        | AJ576843     |

|                                                            |                 |       |                                                       |         |     |    |                                          |           |
|------------------------------------------------------------|-----------------|-------|-------------------------------------------------------|---------|-----|----|------------------------------------------|-----------|
| BAC end sequence                                           | CH241-101N2_SP6 | 20    | F: TCCATTTTCCTATGCCTGTC<br>R: GTCCCTGCCCTAGAATTG      | 201     | 1.5 | 59 |                                          | AJ576997  |
| BAC end sequence                                           | CH241-102A12_T7 | 20    | F: TGGCTGGCAGATTACTTGTG<br>R: AGATGCTCGTGGGAAAACAC    | 196     | 1.5 | 60 |                                          | AJ583942  |
| BAC end sequence                                           | CH241-102E20_T7 | 20    | F: AAGCTACCCTACCACCAAC<br>R: ACCTGCTCCTTCTTGTGC       | 264     | 1.5 | 60 |                                          | AJ584133  |
| BAC end sequence                                           | CH241-102G5_SP6 | 20    | F: GATTTCTGTCCGGATTGC<br>R: TGGTTAGGCCAGGAAGTC        | 272     | 1.5 | 59 |                                          | AJ584229  |
| BAC end sequence                                           | CH241-102I4_SP6 | 20    | F: CCATTTACTAACGGATGCTG<br>R: TTTTCTGTGGAAGAACATGC    | 216     | 1.5 | 60 |                                          | AJ584316  |
| BAC end sequence                                           | CH241-103M18_T7 | 20    | F: GAACGCAGGCTTTAGGTGTC<br>R: CTCACCTGTACTGCCAAGTCC   | 160     | 1.5 | 60 |                                          | AJ618884  |
| colipase, pancreatic                                       | CLPS            | 20    | F: AAACAGAGGCTCCCCAGAGT<br>R: AGTGTCTGCAGAGGCACAGA    | 200     | 2.0 | 58 |                                          | AF097592  |
| cytidine monophosphate-N-acetylneuraminic acid hydroxylase | CMAH            | 20    | F: TCCAAGGGAAAAGAGAGAGAAA<br>R: ATGATCCTGGAGTGGAATCAA | 148     | 1.5 | 58 |                                          |           |
| collagen, type IX, alpha 1                                 | COL9A1          | 20q24 | F: TGGAAAATGCCTGCTTTCTA<br>R: TAATGCAGTTGATCCCACGA    | 200     | 2.0 | 58 | Godard et al. 1998; Caetano et al. 1999* | AF130755  |
| collagen, type XIX, alpha 1                                | COL19A1         | 20    | F: CTGTAGTCGTTGATGGTGGAA<br>R: ACAAGAGACGGAGTTCTCGAT  | 106     | 1.5 | 59 |                                          |           |
| microsatellite                                             | COR029          | 20    | F: CTAGAAGGGTTTCCCAAAGG<br>R: TCGAGCTCCTGAAGAACATC    | 222-228 | 3.0 | 58 | Murphie et al. 1999                      | AF101398  |
| microsatellite                                             | COR050          | 20    | F: TCTGTTGCCTTTATCCACAA<br>R: ATGAAAACCCTGGGAATAGC    | 283-297 | 1.5 | 58 | Ruth et al. 1999                         | AF108367  |
| cysteine-rich secretory protein 1                          | CRISP1          | 20q22 | F: CCCCAATCACAGAATATCC<br>R: TCAGCTAGCCTAGAATCTG      | 891     | 1.5 | 58 |                                          | ECA315379 |
| cysteine-rich secretory protein 2                          | CRISP2          | 20q22 | F: ATCAGTGAGCTCAACTAAGAC<br>R: TGGGCCTACTATACTTTGTTG  | 1135    | 1.5 | 58 |                                          | ECA459963 |
| cysteine-rich secretory protein 3                          | CRISP3 (SGP28)  | 20q22 | F: TGTGGCAAGTAAGAATAAGG<br>R: ATCCTGACTACTTTCAACAC    | 1417    | 1.5 | 58 | Chowdhary et al. 2003*                   | ECA459964 |
| endothelin 1                                               | EDN1            | 20    | F: TGCCAAGCAGGAAAAGAACT<br>R: TTCCAGCCTTTCTCCATAGTG   | 209     | 2.0 | 58 | Caetano et al. 1999                      | AF130760  |
| major histocompatibility                                   | ELA-A           | 20    | F: GACTTCTCTTTCTGCAGCTGG                              | 193     | 1.5 | 65 | Bailey et al.                            | BI961794  |

|                                                                                   |          |       |                                                                                |         |     |    |                                  |                     |
|-----------------------------------------------------------------------------------|----------|-------|--------------------------------------------------------------------------------|---------|-----|----|----------------------------------|---------------------|
| complex, class I, A<br>major histocompatibility<br>complex, class II, DM<br>alpha | ELA-DMA  | 20    | R: CACGAAGTTAAGACAGGGAGG<br>F: TTTGTCTCCGCGGTTGATGG<br>R: CCAAGCCAACAATGATGCCC | 450     | 1.5 | 57 | 1979<br>Chowdhary et<br>al. 2003 |                     |
| major histocompatibility<br>complex, class II, DO<br>beta                         | ELA-DOB  | 20    | F: TTGTGATTCAGGCAAAGGCTG<br>R: TGTTCCACTGCTCAGCATCTGG                          | 175     | 1.5 | 55 | Chowdhary et<br>al. 2003         |                     |
| major histocompatibility<br>complex, class II, DQ<br>alpha 1                      | ELA-DQA  | 20    | F: CGACTCAGATGACCACATTG<br>R: GGGGACACATACTGTTGGTAG                            | 260     | 1.5 | 57 | Chowdhary et<br>al. 2003         | AF115329,<br>U92522 |
| exocyst complex<br>component 2                                                    | EXOC2    | 20    | F: GTGATTTCCCCCATAACCC<br>R: CTCCTTCAGAGTCAGTTTCCC                             | 259     | 1.5 | 58 |                                  |                     |
| FK506 binding protein 5                                                           | FKBP5    | 20    | F: TTTTCCTTGCAGGTGTGACTC<br>R: AGTGAATGTTTCCTTGCGTTG                           | 273     | 1.5 | 58 |                                  | CD470964            |
| glutamate-cysteine<br>ligase, catalytic subunit                                   | GCLC     | 20    | F: ATGAGCATCAACACCATCATC<br>R: GTGTCCACATCCACTTCCAT                            | 180     | 2.0 | 62 |                                  | DN507482            |
| guanosine<br>monophosphate<br>reductase                                           | GMPR     | 20    | F: CACGGACAAGTTTACGAAT<br>R: TGGAAAAGATGAGCAGCATAAC                            | 130     | 1.5 | 59 |                                  |                     |
| glycosylphosphatidylinositol<br>specific<br>phospholipase D1                      | GPLD1    | 20    | F: TTGCTTCTTACCCTGCCAAG<br>R: GGTGGCCCCTCATTTTATTT                             | 250     | 1.5 | 60 |                                  |                     |
| glutathione S-transferase<br>A1                                                   | GSTA1    | 20    | F: TCAAGTTTTGATAAAGCAGG<br>R: GTTTCCTTAGTGTACAACTACTC                          | 118     | 1.5 | 60 | Milenkovic et<br>al. 2002        |                     |
| microsatellite                                                                    | HMS04    | 20    | F: GCAAACAACGTGCAATAGAT<br>R: AATTCATCCCAATTGGCTGG                             | 106-112 | 3.0 | 58 | Chowdhary et<br>al. 2003         | X74633              |
| microsatellite                                                                    | HMS42    | 20q24 | F: TAGATTTCTTAAGTGCCAATAGTGG<br>R: GAACTGCTATAGATATACCTAACTC                   | 135     | 2.0 | 65 | Godard et al.<br>1998*           |                     |
| heat shock protein<br>90kDa alpha (cytosolic),<br>class B member 1                | HSP90AB1 | 20    | F: CTACTTGCAGACCAGTGTCC<br>R: CACAATACACAACATCCAAACC                           | 195     | 1.5 | 58 |                                  |                     |
| heat shock 70kDa<br>protein 1A                                                    | HSPA1A   | 20    | F: TGAGGCATACCAGACCCAAG<br>R: AAAGCAAAAAACAGGACAGAGG                           | 251     | 1.5 | 60 |                                  |                     |
| microsatellite                                                                    | HTG05    | 20    | F: TGCTAAGCCTCAGCACATACA<br>R: TGGAAATAAGGTTAGCAGGGATGC                        | 79-95   | 3.0 | 58 | Ellegren et al.<br>1992          | AF169166            |
| intestinal cell (MAK-                                                             | ICK      | 20    | F: GAGAGCCCTAACCTAAAATCAG                                                      | 425     | 1.5 | 58 |                                  |                     |

|                                                                 |            |                      |                                                            |         |     |    |                           |          |
|-----------------------------------------------------------------|------------|----------------------|------------------------------------------------------------|---------|-----|----|---------------------------|----------|
| like) kinase                                                    |            |                      | R: CGCCAAGAGTATGGTATTAC                                    |         |     |    |                           |          |
| inositol 1,4,5-<br>triphosphate receptor,<br>type 3             | ITPR3      | 20q21.2 <sup>a</sup> | F: CCGTGCTCAGATCTGCTGTAGA<br>R: GGCCAAAGGATGTGTAAAACTTTAC  | 246     | 1.5 | 60 |                           | G62183   |
| potassium channel,<br>subfamily K, member 16                    | KCNK16     | 20                   | F: TGCTGTGACGGAGTCTATTG<br>R: TTTGCTTCCACAGGCATCTAC        | 100     | 1.5 | 58 |                           |          |
| kinesin family member<br>13A                                    | KIF13A     | 20                   | F: AGACTCGGCCATGTATAAAAG<br>R: GTTCCAACTTAGCATTCTTCC       | 148     | 1.5 | 58 |                           |          |
| microsatellite                                                  | LEX011     | 20                   | F: ATTCCCAGTGAAGTATTGCCA<br>R: AGAGATGGGTACCTGGGATTC       | 242-244 | 2.0 | 58 | Coogle et al.<br>1996     | AF075614 |
| microsatellite                                                  | LEX052     | 20                   | F: GGAACGGAAGAGTGTAGTTTT<br>R: CATTTATTTCATCAGCGATTG       | 196-225 | 2.0 | 58 | Coogle &<br>Bailey 1997   | AF075654 |
| microsatellite                                                  | LEX064     | 20                   | F: ACCCTTTCCGCAGACAA<br>R: CACATCAGAGCCCATCTTCTC           | 197-209 | 2.0 | 58 | Coogle &<br>Bailey 1999   |          |
| microsatellite                                                  | LEX071/072 | 20                   | F: CTTTATTCTACTCTTTGGTCC<br>R: CCGATATTTCACTGATTATT        | 185-204 | 3.0 | 55 | Bailey et al.<br>2000     | AF213358 |
| mutS homolog 5 (E.<br>coli)                                     | MSH5       | 20                   | F: AGTGTTGGGTGTGCAGATGG<br>R: ATCGAAAGTAGGGCTCCTCC         | 133     | 1.5 | 58 |                           |          |
| methylmalonyl<br>Coenzyme A mutase                              | MUT        | 20q21                | F: CCATTCAAGTGCTTGATGATAT<br>R: CATCACACTTATAACATGACAACA   | 228     | 1.5 | 60 | Lear et al.<br>2001*      | G62188   |
| nucleolar protein 7                                             | NOL7       | 20                   | F: AGGCAGAAGCGAGAGAAG<br>R: GGGACAAAGGGGGACAAG             | 133     | 1.5 | 58 |                           |          |
| neuritin 1                                                      | NRN1       | 20                   | F: TTCAAGAGAGATGTCCACGAG<br>R: CCTTGTGATCTATACCGTTGG       | 359     | 1.5 | 58 |                           | DN509784 |
| nucleoporin                                                     | NUP153     | 20                   | F: AAGCAATCCAGCTCCTTTAGC<br>R: CTGTGGTTCCAAAACCTGAAGC      | 197     | 1.5 | 55 | Perrocheau et<br>al. 2006 | DX010542 |
| microsatellite                                                  | NVHEQ005   | 20                   | F: GGCATGTGCTTCCCCTCAC<br>R: CCTCTTTCCACGCAATCACTCTA       | 151-155 | 1.5 | 58 | Røed et al.<br>1997       | AF011401 |
| microsatellite                                                  | NVHEQ021   | 20                   | F: CCAGAACCTGGACTGAACAGTGTC<br>R: GAATGTGCTTGATGCAGAAGAAGG | 151-161 | 2.0 | 58 | Bjornstad et al.<br>2000  | AJ245762 |
| protein kinase C and<br>casein kinase substrate<br>in neurons 1 | PACIN1     | 20                   | F: CTATAGGGCAGTGGGGGAAT<br>R: ACAGGCTGCTGGATAGCACT         | 145     | 1.5 | 60 |                           |          |
| PHD finger protein 1                                            | PHF1       | 20                   | F: GTGGGGTCGGTTACCTGTC<br>R: CAGGTACATCCCAGCTGTAGG         | 202     | 1.5 | 55 | Perrocheau et<br>al. 2006 | DX010556 |
| pim-1 oncogene                                                  | PIM1       | 20q21.3 <sup>a</sup> | F: TTTGTCGTCCATCTCCATCC<br>R: CCTCCCAGGGGTTAGAAAAC         | 210     | 1.5 | 60 |                           |          |



|                                                           |               |         |                                                        |         |     |    |                                         |          |
|-----------------------------------------------------------|---------------|---------|--------------------------------------------------------|---------|-----|----|-----------------------------------------|----------|
| prolactin                                                 | PRL           | 20      | F: CAACTGCTAAGCCCACATCC<br>R: GATGAGACCCATTACACCCAAG   | 122     | 1.5 | 58 |                                         |          |
| peripherin 2 (retinal degeneration, slow)                 | PRPH2 (RDS)   | 20      | F: TGTCTGCGTCCTCTTCAACA<br>R: ATTGTTGCCACAGCATTTGA     | 199     | 1.5 | 55 | Shubitowski et al. 2001                 | AY008808 |
| run-related transcription factor 2                        | RUNX2 (CBFA1) | 20q21.3 | F: TCTTACCCCTCCTACCTGAGC<br>R: ACGTCGGTGATGACAGGAA     | 101     | 1.5 | 55 | Perrocheau et al. 2006*                 | DX010447 |
| serpin peptidase inhibitor, clade B (ovalbumin), member 1 | SERPINB1      | 20      | F: TGGACCAAACCTGAGAATCTG<br>R: TCCTCATTCAGGTCCACAAAG   | 215     | 1.5 | 55 | Perrocheau et al. 2005                  | AY817484 |
| serpin peptidase inhibitor, clade B (ovalbumin), member 9 | SERPINB9      | 20      | F: TTAGCCACCTGGTGATACCC<br>R: ACCAGACAATGGAAGGCAAG     | 228     | 1.5 | 60 |                                         | M91161   |
| solute carrier family 17 (sodium phosphate), member 2     | SLC17A2       | 20      | F: TCTATGCTGCCTACTACATCC<br>R: CACTTGAATTACACCAGTCTCC  | 268     | 1.5 | 58 |                                         |          |
| SFRS protein kinase 1                                     | SRPK1         | 20      | F: CTAGACTTGCGCTAGACATTAC<br>R: GCACCACTTTTTCCTTTGCC   | 292     | 1.5 | 58 |                                         |          |
| signal sequence receptor, alpha                           | SSR1          | 20      | F: AGATAACGCCATTACCGCCGGA<br>R: AACACGAGCAGGAGAAGCAGAA | 116     | 1.5 | 58 |                                         |          |
| transcription factor AP-2 alpha                           | TFAP2A        | 20      | F: TGCCCTGGAAAGCAATGTAT<br>R: CTCGCTCCTCTCCCTCTCTC     | 180     | 1.5 | 60 |                                         |          |
| microsatellite                                            | TKY008        | 20q21.1 | F: TTCAC TTGTGCATGAAGCTG<br>R: GTTCCCAATGTGTGAGGAAT    | 148     | 4.0 | 55 | Hirota et al. 1997, Hirota et al. 2001* | AB048319 |
| microsatellite                                            | TKY273        | 20      | F: GATCACTGGCGAGGGTAAGC<br>R: TATGTTCCCGATTTCGCAAGC    | 174-194 | 2.0 | 58 | Tozaki et al. 2000                      | AB033924 |
| microsatellite                                            | TKY321        | 20      | F: CACTGTGTAACTAACACC<br>R: TGTGACTTCAAGAAGACGACG      | 96-120  | 1.5 | 58 | Tozaki et al. 2000c                     | AB034629 |
| microsatellite                                            | TKY477        | 20      | F: CCCCTCTCTCTCTCAAGTGC<br>R: CTCCTGGGTGGGAGAACTTT     | 108-134 | 1.5 | 58 | Tozaki et al. 2004                      | AB103695 |
| microsatellite                                            | TKY507        | 20      | F: CACCTGCCTACAGTCCAAGC<br>R: TTTGTGCTTAATGCCTTTGTG    | 129-141 | 1.5 | 55 | Tozaki et al. 2004                      | AB103725 |
| microsatellite                                            | TKY539        | 20      | F: GCTTTACGGCATTAACACA<br>R: ATTGATGGTGGCAAGGAGTC      | 192-206 | 1.5 | 58 | Tozaki et al. 2004                      | AB103757 |
| microsatellite                                            | TKY547        | 20      | F: TTGCTCAGGAAGCAAAGGAT<br>R: AAAATGAGGCTTTTCGCACAT    | 224-238 | 1.5 | 58 | Tozaki et al. 2004                      | AB103765 |
| microsatellite                                            | TKY649        | 20      | F: AGGGGATAAATTCCCTCACC                                | 208-214 | 1.5 | 58 | Tozaki et al.                           | AB103867 |

|                |         |    |                                                        |        |     |    |                       |          |
|----------------|---------|----|--------------------------------------------------------|--------|-----|----|-----------------------|----------|
| microsatellite | TKY666  | 20 | R: CACGTCCTGCAAATTTCTGT<br>F: TACCTGAGGGTTACTGTATG     | 132    | 2.0 | 58 | 2004                  | AB103884 |
| microsatellite | TKY694  | 20 | R: AGTTGCATTGTTAGAAGCCA<br>F: CCGCACAGACTTCACAAAGA     | 91-111 | 1.5 | 50 | Tozaki et al.<br>2004 |          |
| microsatellite | TKY821  | 20 | R: ACACACCCATGAACCCACTT<br>F: ATTCACTCTACTAGGCCTG      | 111    | 2.0 | 58 | Tozaki et al.<br>2004 | AB104039 |
| microsatellite | TKY848  | 20 | R: AGACTGGGGAAGTTGAGTG<br>F: AGAGGCACTCACAAC TAGAA     | 249    | 2.0 | 58 |                       | AB104066 |
| microsatellite | TKY912  | 20 | R: TTTCTCATCTCACAGATGGC<br>F: TCTGTGGTGCTTTGTATGG      | 288    | 2.0 | 58 |                       | AB104130 |
| microsatellite | TKY925  | 20 | R: AGTCACCACTTCATGAACTC<br>F: AGCAAGATTGGCAACAGATG     | 114    | 2.0 | 58 |                       | AB104143 |
| microsatellite | TKY940  | 20 | R: TCTGCCATTTTCAGAGAGTTAG<br>F: TAGATATCAAGAGAGCCAGG   | 122    | 2.0 | 58 |                       | AB104158 |
| microsatellite | TKY995  | 20 | R: AGGTCAGGTAGGGTGCAAG<br>F: TTTAGTGAACATCTGCCGTG      | 273    | 2.0 | 58 |                       | AB104213 |
| microsatellite | TKY1024 | 20 | R: CAGCTGGCAAGTTTCTTTAATG<br>F: AACACATATTTGGAAAAGGCAC | 97     | 2.0 | 58 |                       | AB104242 |
| microsatellite | TKY1040 | 20 | R: TGATTCTCTGGAGTTAGTG<br>F: TAGAAAGTAGGGGAAGATGG      | 217    | 2.0 | 58 |                       | AB104258 |
| microsatellite | TKY1070 | 20 | R: TTCTGGTTTCCCTGAATGAG<br>F: CAGTCTTCCTCAGCAAAGAG     | 154    | 2.0 | 58 |                       | AB104288 |
| microsatellite | TKY1115 | 20 | R: CTCTTTCCCTTCTGGACTTC<br>F: GAATACACACGGGTAGGTTG     | 252    | 2.0 | 58 | Tozaki et al.<br>2004 | AB104333 |
| microsatellite | TKY1116 | 20 | R: ATGGCAGCCTACAGTAAAAG<br>F: ACGCTAGTATGAAGGTCAAC     | 254    | 2.0 | 58 |                       | AB104334 |
| microsatellite | TKY1405 | 20 | R: GTGATTACCATGAGGTTTCGT<br>F: GGACAGCATTTCTAAGAGAG    | 109    | 1.5 | 58 | Tozaki et al.<br>2007 | AB215348 |
| microsatellite | TKY1517 | 20 | R: TGGCCAGAGAAAACGTCTC<br>F: TAAAAGTGTGGGCATGTATG      | 176    | 1.5 | 58 | Tozaki et al.<br>2007 | AB215460 |
| microsatellite | TKY1798 | 20 | R: CAAAACAACAACCTCAGAGC<br>F: GGCTTTTGGTTGGTTAGTAC     | 180    | 1.5 | 58 | Tozaki et al.<br>2007 | AB215741 |
| microsatellite | TKY2230 | 20 | R: CCATGTGGCTTAGATATCTG<br>F: GATCAAGACATGCGGTATAG     | 237    | 1.5 | 58 | Tozaki et al.<br>2007 | AB216173 |
| microsatellite | TKY2258 | 20 | R: CTAAATGGGTACTGGAGTC<br>F: CCAATGAGAGGGAGAGAATG      | 157    | 1.5 | 58 | Tozaki et al.<br>2007 | AB216201 |
|                |         |    | R: TGCTCTGAGTGTAAGCCGT                                 |        |     |    |                       |          |

|                                                             |          |                |                                                          |         |     |    |                          |          |
|-------------------------------------------------------------|----------|----------------|----------------------------------------------------------|---------|-----|----|--------------------------|----------|
| microsatellite                                              | TKY2503  | 20             | F: ACCATAAGGGGGCAATTTAG<br>R: AGCCCTGGAAAAATGAGAGT       | 213     | 1.5 | 60 | Tozaki et al.<br>2007    | AB216446 |
| microsatellite                                              | TKY3403  | 20             | F: TTGGACGAGTATCAATTTGC<br>R: CACCAATGGGAAAAGAAATGA      | 120     | 1.5 | 56 | Tozaki et al.<br>2007    | AB217346 |
| tumor necrosis factor                                       | TNF      | 20q16-<br>21.1 | F: CTTCTCGAACCCCAAGTGAC<br>R: GAGACAGCTAAGCGGCTGAT       | 548     | 1.5 | 58 |                          |          |
| tumor necrosis factor<br>receptor superfamily,<br>member 21 | TNFRSF21 | 20             | F: CTTTCTCCAACGGGTACACA<br>R: ATCAGTCCACGAATCTTCTCC      | 154     | 1.5 | 59 |                          | CX600724 |
| triggering receptor<br>expressed on myeloid<br>cells 1      | TREM1    | 20             | F: CTGGTCCTTACTGTCCTGTTTGC<br>R: CTGCCAGATGGATGTAGATGGAG | 104     | 1.5 | 62 |                          | BI961625 |
| tripartite motif-<br>containing 27                          | TRIM27   | 20             | F: TTGAAGGAGCATGAGTATCG<br>R: GATGTTGCAGGAGAACTGTGT      | 102     | 1.5 | 58 |                          | CX603302 |
| ubiquitin protein ligase<br>E3 component n-<br>recognin 2   | UBR2     | 20             | F: CCAGGGACACCCTCTTCTAAC<br>R: ATTTTGGCCTTTGTACATCC      | 209     | 1.5 | 58 |                          | BM780968 |
| microsatellite                                              | UM011    | 20             | F: TGAAAGTAGAAAGGGATGTGG<br>R: TCTCAGAGCAGAAGTCCCTG      | 150-180 | 3.0 | 58 | Meyer et al.<br>1997     | AF195130 |
| microsatellite                                              | UM013    | 20             | F: TGCCACATTTGCCCTGGTT<br>R: ACTGAAACACACCTCCTCTCCG      | 190     | 2.0 | 58 |                          | AF195132 |
| microsatellite                                              | UMNe056  | 20             | F: TCTGTCTGCAGCTAAAGAGGC<br>R: GCGGGGTACATAAAGACTGTAGC   | 193-201 | 2.0 | 58 | Roberts et al.<br>2000   | AF191692 |
| microsatellite                                              | UMNe064  | 20             | F: TTGCTTTTCTTCTACACTCCC<br>R: TTGACCTAAAGCTCAATGTGTG    | 145-147 | 2.0 | 58 | Roberts et al.<br>2000   | AF191697 |
| microsatellite                                              | UMNe065  | 20             | F: TCCTTCCACTCCCCTCAAC<br>R: TCCCTGAAAAACCTTGGTTG        | 126-146 | 2.0 | 58 | Roberts et al.<br>2000   | AF191698 |
| microsatellite                                              | UMNe067  | 20             | F: TCCTTACCCCTTTGGAGATG<br>R: CAATGGTGTGCTCCATGAAG       | 171-175 | 2.0 | 58 | Roberts et al.<br>2000   | AF191700 |
| microsatellite                                              | UMNe094  | 20             | F: TCTCCTCACCTTTGCTCAC<br>R: GGGCGGGGTACATAAAGACTG       | 173     | 1.5 | 58 |                          |          |
| microsatellite                                              | UMNe119  | 20             | F: GTTTTCATTCTGACGTTGATG<br>R: AATCCCTAGGAAGACAGGAGAC    | 109     | 1.5 | 58 | Mickelson et<br>al. 2003 | AF536253 |
| microsatellite                                              | UMNe151  | 20             | F: CATTTCAAGGGCTACTTTGACC<br>R: CATACGTTTTGCACCCTCTC     | 151     | 1.5 | 58 | Mickelson et<br>al. 2003 | AF536264 |
| microsatellite                                              | UMNe170  | 20             | F: GGGTGTTAAGAATCCTGCTCC<br>R: CTAGGCAAACCTACTGACCCCC    | 138     | 2.0 | 58 | Wagner et al.<br>2004a   | AY391309 |

|                                          |         |               |                                                             |     |     |    |                            |          |
|------------------------------------------|---------|---------------|-------------------------------------------------------------|-----|-----|----|----------------------------|----------|
| microsatellite                           | UMNe214 | 20            | F: TCCTTCCACTCCCCCTCAAC<br>R: TCTCTCTGGCCATCTGGC            | 165 | 2.0 | 55 |                            |          |
| microsatellite                           | UMNe225 | 20            | F: GATCTCTTGCTGTGTGTTTGTG<br>R: TCAATTTTCAACAAGATGGAAACG    | 154 | 2.0 | 55 | Wagner et al.<br>2004a     | AY391322 |
| microsatellite                           | UMNe272 | 20            | F: AATACTGCCAGTGCCATTGC<br>R: AAGGCTAAGAAGGATGGAATCC        | 172 | 2.0 | 58 |                            |          |
| microsatellite                           | UMNe274 | 20            | F: CAGTGTACAGAGTTAGGATGCACA<br>R: TTCACAAAAGATGTATGAAGTCACA | 139 | 2.0 | 58 |                            |          |
| microsatellite                           | UMNe301 | 20            | F: TTTTGGGGTCCAGAATAAACC<br>R: TAGACAACCAAATGCCAAAGG        | 140 | 2.0 | 58 | Wagner et al.<br>2004a     | AY391332 |
| microsatellite                           | UMNe304 | 20            | F: AGATGGGCATGGATGTTAGC<br>R: GGTTCCTGAATGAGAACG            | 199 | 2.0 | 58 |                            |          |
| microsatellite                           | UMNe341 | 20            | F: TCCAACTTTTTGCATATGTTGC<br>R: ACGTTTGAACCTCAATCCAACC      | 223 | 2.0 | 58 | Mickelson et<br>al. 2004   | AY731387 |
| microsatellite                           | UMNe380 | 20            | F: TTCCACATATACGTGTGTGTATGG<br>R: AGTACCAGGAATAAGAAATGGGC   | 154 | 2.0 | 58 | Wagner et al.<br>2004b     | AY464471 |
| microsatellite                           | UMNe418 | 20            | F: CCCTTAACAACCACCCCC<br>R: TTGGGAGACAGGACTTACCG            | 200 | 2.0 | 58 | Wagner et al.<br>2004b     | AY464484 |
| microsatellite                           | UMNe428 | 20            | F: AGGTCCCTCTCAACTCTATCCC<br>R: TACACTAGCGTATAAGGGCACG      | 152 | 1.5 | 58 | Wagner et al.<br>2004c     | AY735248 |
| microsatellite                           | UMNe456 | 20            | F: TAACCTCCCAGGTCCAACCTG<br>R: TCGTCAGCACTTACAATGACG        | 274 | 1.5 | 60 |                            |          |
| microsatellite                           | UMNe480 | 20            | F: CCACTGGTAAACGTCCCCG<br>R: TTTCTGGAAATTTTGCCAGG           | 200 | 1.5 | 55 | Wagner et al.<br>2004b     | AY464498 |
| microsatellite                           | UMNe484 | 20            | F: GGGGAGCATTATCTGATACAGC<br>R: AGGCTTAGAAAATTGAAAGGGG      | 250 | 1.5 | 55 | Wagner et al.<br>2004b     | AY464501 |
| microsatellite                           | UMNe494 | 20            | F: GCTCTTGGGAATTGTTGGTG<br>R: CCAAGAAACATTTGGGATGG          | 150 | 1.5 | 55 | Wagner et al.<br>2004b     | AY464505 |
| vascular endothelial<br>growth factor A  | VEGF    | 20q21.3       | F: ACGTCTACGCGCAGCTACT<br>R: TGCATGGTGATGTTGAACTCC          | 181 | 1.5 | 55 | Perrocheau et<br>al. 2006* | DX010658 |
| Werner helicase<br>interacting protein 1 | WRNIP1  | 20q13-<br>q14 | F: GCCGTTTCGTTGTTTTAGG<br>R: CAAAGCTGCCGGATATTTTC           | 218 | 1.5 | 58 |                            | CD528438 |

| Name                                                       | Symbol                         | Horse chr. | Primers                                                     | Product size (bp) | MgCl <sub>2</sub> (mM) | T <sub>a</sub> | Reference                                          | Accession No |
|------------------------------------------------------------|--------------------------------|------------|-------------------------------------------------------------|-------------------|------------------------|----------------|----------------------------------------------------|--------------|
| microsatellite                                             | 21CA001                        | 21         | F: TCATGCTGAAATCAATGCAAA<br>R: TTCCTTATGGCAACAACACG         | 295-311           | 1.5                    | 58             |                                                    | AY820151     |
| sequence tagged site                                       | 21STS01                        | 21         | F: CGTGACAATCGTGTGGTG<br>R: TTCGGTCATGGTCTGGATG             | ~800              | 55                     | 1.5            | Goh et al. 2007                                    |              |
| sequence tagged site                                       | 21STS02                        | 21         | F: AGAGTTGTCGGGGATTTTGT<br>R: TTTGGAAGCAGTTTTAATGGAGA       | 195               | 1.5                    | 55             | Perrocheau et al. 2006                             | DX010651     |
| ADAM metalloproteinase with thrombospondin type 1 motif, 6 | ADAMTS6                        | 21q14      | F: GCCTAGGAAATTTGATGTTGCT<br>R: AGCACAAGTAGCTGAGCATTCT      | 635               | 1.5                    | 58             | Goh et al. 2007*                                   |              |
| adenylate cyclase 2                                        | ADCY2                          | 21         | F: GAAGACCACGTGGCATTTTT<br>R: CGAAACACATGAACAAGTAGCC        | 166               | 1.5                    | 58             | Goh et al. 2007                                    |              |
| microsatellite                                             | AHT010                         | 21         | F: CTCCTAGTACCATTTTGAAC<br>R: CAAAGTAGAGCAAGACTGGC          | 124-126           | 1.5                    | 56             | Swinburne et al. 2005                              |              |
| microsatellite                                             | AHT077                         | 21         | F: TTCACCATTCTTCCCCATC<br>R: GGAAAAAGGGATTTTCTAAGCC         | 117-121           | 1.5                    | 56             | Swinburne et al. 2003                              |              |
| microsatellite                                             | AHT078                         | 21         | F: CCTCTCGCAGAAGCACAAAT<br>R: GCTCCCTGCTGACTTCTGAG          | 191-195           | 2.0                    | 58             | Swinburne et al. 2003                              | AJ507695     |
| A kinase (PRKA) anchor protein 8                           | AKAP8                          | 21q12      | F: ACCAGCGTTTGGACATGATG<br>R: ATAGTCGTAGCTGTAGCTGG          | 710               | 1.5                    | 58             | Brinkmeyer-Langford et al. 2005 ; Goh et al. 2007* | BI774186     |
| brain abundant, membrane attached signal protein 1         | BASP1                          | 21q18      | F: GGGTCCTGGATTTTAAAGATCAATG<br>R: TGGCATCGAGATACATGTGGATAG | 302               | 3.0                    | 58             | Chowdhary et al. 2003*; Goh et al. 2007            |              |
| brix domain containing 2                                   | BXDC2                          | 21         | F: AAGAAGATGCTGCTCTGGTA<br>R: CAGCTGTGATGGATCTTATG          | 403               | 1.5                    | 58             | Goh et al. 2007                                    |              |
| C1q and tumor necrosis factor related protein 3            | C1QTNF3                        | 21         | F: CAACCATGCAGTGTGAAGC<br>R: GAAGAGCAGGAAGCCTGCAA           | 115               | 1.5                    | 58             | Goh et al. 2007                                    |              |
| chromosome 5 open reading                                  | C5orf22<br>( <i>FLJ11193</i> ) | 21         | F: TATACCGGGCCATAGGCTCA<br>R: ACGGTGTCTGCTGGCATATT          | 109               | 1.5                    | 55             | Goh et al. 2007                                    |              |

|                    |                     |               |                               |         |     |    |                                                |          |
|--------------------|---------------------|---------------|-------------------------------|---------|-----|----|------------------------------------------------|----------|
| frame 22           |                     |               |                               |         |     |    |                                                |          |
| chromosome 5       | C5orf23             | 21            | F: GGGAGAAATTTGAATCAGCAG      | 103     | 4.0 | 50 | Chowdhary et al.                               |          |
| open reading       | ( <i>FLJ14054</i> ) |               | R: GCCCTTTATTCCTTGTGCATA      |         |     |    | 2003                                           |          |
| frame 23           |                     |               |                               |         |     |    |                                                |          |
| chromosome 5       | C5orf38             | 21            | F: GGACATACGTGAATTTGTTGG      | 231     | 1.5 | 58 |                                                |          |
| open reading       |                     |               | R: AAATATCAAATTTGTTTCCACTTCTT |         |     |    |                                                |          |
| frame 38           |                     |               |                               |         |     |    |                                                |          |
| complement         | C6                  | 21            | F: CTAATAATGGCCGCCCCAC        | 1035    | 1.5 | 58 | Goh et al. 2007                                |          |
| component 6        |                     |               | R: GGCTCCAGGAAGACCAACAA       |         |     |    |                                                |          |
| complement         | C9                  | 21q17         | F: GTTGCTCGTTGTGGGTTTCT       | 196     | 2.0 | 58 | Godard et al.                                  | AF115746 |
| component 9        |                     |               | R: CGCAAATTTTCTCCCTCTTTC      |         |     |    | 2000*; Chowdhary<br>et al. 2003                |          |
| cyclin B1          | CCNB1               | 21q13-<br>q14 | F: CAAAATACCTACTGGGTCGG       | 704     | 1.5 | 58 | Goh et al. 2007*                               |          |
|                    |                     |               | R: AATTTCTGGAGGGTACATTTCT     |         |     |    |                                                |          |
| cadherin 10, type  | CDH10               | 21q17-<br>q18 | F: TGACATTCATGCCACAAGAAG      | 198     | 1.5 | 55 | Perrocheau et al.                              | DX010449 |
| 2                  |                     |               | R: ACAACCGACATTTTCAGGAACA     |         |     |    | 2006*                                          |          |
| cadherin 12, type  | CDH12               | 21            | F: ATCAAAGGCTACAAGAAAATGATATG | 196     | 1.5 | 50 | Goh et al. 2007                                |          |
| 2                  |                     |               | R: CCAAACATGTCTGCCAAGACT      |         |     |    |                                                |          |
| cadherin 9, type 2 | CDH9                | 21            | F: GGATAGTGAGTCTGACACAAG      | 98      | 2.0 | 55 | Goh et al. 2007                                |          |
|                    |                     |               | R: ACCTGTATACTCTTCCAACAAG     |         |     |    |                                                |          |
| cartilage          | COMP                | 21q12-<br>q14 | F: TCGTGCAAACAATGAACAGC       | 570     | 1.5 | 60 | Mueller et al.                                 | AF325902 |
| oligomeric         |                     |               | R: TCCACATGACCACGTAGAAG       |         |     |    | 2005a*;<br>Brinkmeyer-<br>Langford et al. 2005 |          |
| matrix protein     |                     |               |                               |         |     |    |                                                |          |
| microsatellite     | COR068              | 21            | F: AACCAATTGTGAGATTTTTGCT     | 144-156 | 2.0 | 58 | Tallmadge et al.                               | AF142605 |
|                    |                     |               | R: GGCTAGTCCTGGATCATGTG       |         |     |    | 1999a                                          |          |
| microsatellite     | COR073              | 21            | F: GCCAAGACATGGAAACAATC       | 180-198 | 2.0 | 58 | Tallmadge et al.                               | AF142610 |
|                    |                     |               | R: GTTCTCAAGGTGCATCCCTA       |         |     |    | 1999a                                          |          |
| CREB regulated     | CRTC1               | 21            | F: CAGCCTCTCTAAAGAACTGAC      | 129     | 1.5 | 58 |                                                | CB445064 |
| transcription      |                     |               | R: TTGAGCATGTGCAGTCCATC       |         |     |    |                                                |          |
| coactivator 1      |                     |               |                               |         |     |    |                                                |          |
| disabled homolog   | DAB2                | 21            | F: ATCCTTTCCGTGACGATCCT       | 412     | 1.5 | 58 | Goh et al. 2007                                |          |
| 2 (Drosophila)     |                     |               | R: ATGGCTATGGAGTCATGTGG       |         |     |    |                                                |          |
| DEAD (Asp-Glu-     | DDX4                | 21            | F: ATGTTCATCGAATTGGGCGT       | 291     | 1.5 | 58 | Goh et al. 2007                                |          |
| Ala-Asp) box       |                     |               | R: TTTCTTCCAACCATGCAGGA       |         |     |    |                                                |          |
| polypeptide 4      |                     |               |                               |         |     |    |                                                |          |
| DEP domain         | DEPDC1B             | 21            | F: TGGATATCACTTTATCTGCTCCA    | 136     | 1.5 | 50 | Goh et al. 2007                                |          |

|                                                                                                                                                                                                                                                                                                                                                                                                                                                                                                                                                                                      |                                                                                                                                                                                                                                |                                                                                                                 |                                                                                                                                                                                                                                                                                                                                                                                                                                                                                                                                                                                                                                                             |                                                                                                                      |                                                                                                        |                                                                                              |                                                                                                                                                                                                                                                         |                                                                              |
|--------------------------------------------------------------------------------------------------------------------------------------------------------------------------------------------------------------------------------------------------------------------------------------------------------------------------------------------------------------------------------------------------------------------------------------------------------------------------------------------------------------------------------------------------------------------------------------|--------------------------------------------------------------------------------------------------------------------------------------------------------------------------------------------------------------------------------|-----------------------------------------------------------------------------------------------------------------|-------------------------------------------------------------------------------------------------------------------------------------------------------------------------------------------------------------------------------------------------------------------------------------------------------------------------------------------------------------------------------------------------------------------------------------------------------------------------------------------------------------------------------------------------------------------------------------------------------------------------------------------------------------|----------------------------------------------------------------------------------------------------------------------|--------------------------------------------------------------------------------------------------------|----------------------------------------------------------------------------------------------|---------------------------------------------------------------------------------------------------------------------------------------------------------------------------------------------------------------------------------------------------------|------------------------------------------------------------------------------|
| containing 1B<br>DIM1<br>dimethyladenosin<br>e transferase 1-<br>like<br>dynein,<br>axonemal, heavy<br>chain 5<br>endothelial<br>differentiation,<br>lysophosphatidic<br>acid G-protein-<br>coupled receptor,<br>4<br>EGF-like,<br>fibronectin type<br>III and laminin G<br>domains<br>erbb2 interacting<br>protein<br>excision repair<br>cross-<br>complementing<br>rodent repair<br>deficiency,<br>complementation<br>group 8<br>F-box and<br>leucine-rich<br>repeat protein 7<br>F-box protein 4<br>FK506 binding<br>protein 8<br>hypothetical<br>protein FLJ13611<br>follistatin | ( <i>XTP1</i> )<br>DITM1L<br>( <i>HEST014</i> )<br><br>DNAH5<br><br>EDG4<br><br>EGFLAM<br>( <i>FLJ39155</i> )<br><br>ERBB2IP<br><br>ERCC8<br>( <i>CKNI</i> )<br><br>FBXL7<br><br>FBXO4<br><br>FKBP8<br><br>FLJ13611<br><br>FST | 21q13<br><br>21q18<br><br>21<br><br>21<br><br>21<br><br>21<br><br>21<br><br>21<br><br>21<br><br>21<br><br>21q16 | R: TTGGAGAGTTTGGCATCTGT<br>F: CTTGACTTGAGTTTGAAACATTC<br>R: CTTGAATGACTAGTGTTAGGAG<br><br>F: AATGACCGACCTCACTGCTT<br>R: CCATATTGTCCAGAGCCCAG<br><br>F: CTCTTCCTCATGTTCCACACA<br>R: ACAGCCACCATGAGCAGGAA<br><br>F: TCGCTCTGCACACTAACAGG<br>R: CTGGTGTTACTTGGCTCCG<br><br>F: CCACAGTCTGCACCTCAAATA<br>R: TGATTTTCTGTGCTCTCTGATCTAG<br>F: ATAGTCATCATATGTCTCCGGT<br>R: GTTGTACTTTGGGTCCTCTAGTA<br><br>F: CCAAGTACTGCGGCAAGCTG<br>R: CAAGACTTGAGGCTGAGGCG<br><br>F: CCGTCCTATGTATGGAGCTGTCT<br>R: CATCAATCTGCCTCTGAGGC<br>F: AACTCCTACGACCTCGCCAT<br>R: GCCTTGATGTTGTCAGGCTG<br>F: GCAGGCATCATTAAGGGAGTA<br>R: CAGTATCTGGGATTGCCTCC<br>F: TGCCCTGACAGTAAGTCTGAG | ~250<br><br>527<br><br>365<br><br>146<br><br>164<br><br>1150<br><br>199<br><br>176<br><br>642<br><br>1309<br><br>124 | 1.5<br><br>1.5<br><br>1.5<br><br>1.5<br><br>1.5<br><br>1.5<br><br>1.5<br><br>1.5<br><br>1.5<br><br>1.5 | 55<br><br>58<br><br>58<br><br>58<br><br>58<br><br>58<br><br>58<br><br>58<br><br>58<br><br>58 | Godard et al. 2000*<br><br>Goh et al. 2007*<br><br>Brinkmeyer-<br>Langford et al. 2005<br><br>Goh et al. 2007<br><br>Goh et al. 2007 | AW735741<br><br><br><br>CK461960<br><br><br><br><br><br><br><br><br>CB427408 |
|--------------------------------------------------------------------------------------------------------------------------------------------------------------------------------------------------------------------------------------------------------------------------------------------------------------------------------------------------------------------------------------------------------------------------------------------------------------------------------------------------------------------------------------------------------------------------------------|--------------------------------------------------------------------------------------------------------------------------------------------------------------------------------------------------------------------------------|-----------------------------------------------------------------------------------------------------------------|-------------------------------------------------------------------------------------------------------------------------------------------------------------------------------------------------------------------------------------------------------------------------------------------------------------------------------------------------------------------------------------------------------------------------------------------------------------------------------------------------------------------------------------------------------------------------------------------------------------------------------------------------------------|----------------------------------------------------------------------------------------------------------------------|--------------------------------------------------------------------------------------------------------|----------------------------------------------------------------------------------------------|---------------------------------------------------------------------------------------------------------------------------------------------------------------------------------------------------------------------------------------------------------|------------------------------------------------------------------------------|

|                                                                         |              |           |                                                                              |         |     |       |                                                   |          |
|-------------------------------------------------------------------------|--------------|-----------|------------------------------------------------------------------------------|---------|-----|-------|---------------------------------------------------|----------|
| growth differentiation factor 1                                         | GDF1         | 21        | R: ATCCGGAATGCTTTACTTCC<br>F: CTCAAGGTCCTGTATGCCA<br>R: TGTACAGGAACCAGTAGAGG | 124     | 1.5 | 58    | Brinkmeyer-Langford et al. 2005                   | BM286244 |
| glial cell derived neurotrophic factor                                  | GDNF         | 21        | F: TTTTCAGGTACTGCAGCGGC<br>R: GGTCGTCATCAAAGGCGATG                           | 141     | 1.5 | 55    | Goh et al. 2007                                   |          |
| growth hormone receptor                                                 | GHR          | 21q16     | F: TTGGCCTCAACTGGACTCTA<br>R: CCAGGACTATCCACCCCTTC                           | 114     | 2.0 | 58    | Caetano et al. 1999a; Milenkovic et al. 2002*     | AF097588 |
| GEM interacting protein                                                 | GMIP         | 21q13-q14 | F: GTTATCCGCTCGCTGAAGA<br>R: ACAATGCCCAGGTTGTTGG                             | 460     | 1.5 | 58    | Brinkmeyer-Langford et al. 2005; Goh et al. 2007* | BE682381 |
| granzyme A                                                              | GZMA (CTLA3) | 21q14-q15 | F: ATGTGGCTATCCTTCGTCTC<br>R: TTCCGGCACAAATCATATTC                           | 402     | 1.5 | 58    | Chowdhary et al. 2003*; Goh et al. 2007           |          |
| hyperpolarization activated cyclic nucleotide-gated potassium channel 1 | HCN1         | 21        | F: GATACAGTTTTCTATTGGACCTG<br>R: GGGATGGATGAGATGAAGTCA                       | 146     | 1.5 | 58    | Goh et al. 2007                                   |          |
| 3-hydroxy-3-methylglutaryl-Coenzyme A synthase 1                        | HMGCS1       | 21        | F: ACTGGGCACGGATCTTTTT<br>R: GGACACATATGCAACATGCCT                           | 147     | 2.0 | 65    | Chowdhary et al 2003                              |          |
| heat shock 27kDa protein 3                                              | HSPB3        | 21        | F: AGTTTCAAGCTCGCGGTTTG<br>R: TACTGTCGGGTGAAGCTTCTTG                         | 298     | 1.5 | 58    | Goh et al. 2007                                   |          |
| microsatellite                                                          | HTG10        | 21q15     | F: CAATTCCCGCCCCACCCCGGCA<br>R: TTTTATTCTGATCTGTACATTT                       | 93      | 1.5 | TD 60 | Marklund et al. 1994; Goh et al. 2007*            | AF169294 |
| microsatellite                                                          | HTG32        | 21        | F: CCTGAAACCTCAGTAAACAGA<br>R: TGTGGCTTTGGTGTGGAAAC                          | 150-160 | 2.0 | 58    | Lindgren 2000                                     |          |
| 5-hydroxytryptamine (serotonin) receptor 1A                             | HTR1A        | 21        | F: GGAGAGAAGAGGGGAGAGGA<br>R: GACTCCAGCTGGGAAGTGAG                           | 232     | 1.5 | 62    |                                                   |          |



|                                                                                                                                   |              |           |                                                        |         |     |    |                                              |          |
|-----------------------------------------------------------------------------------------------------------------------------------|--------------|-----------|--------------------------------------------------------|---------|-----|----|----------------------------------------------|----------|
| interleukin 7 receptor                                                                                                            | IL7R         | 21q17     | F: TGGAGTGAATGGAGTCCAAGT<br>R: TATAGCCACACCACCCTGGA    | 150     | 2.0 | 58 | Caetano et al. 1999a; Chowdhary et al. 2003* | AF115754 |
| insulin-like 3 (Leydig cell)                                                                                                      | INSL3        | 21q13-q14 | F: GAACTGCTACAGTGGCTGGAAGG<br>R: TCAGTGGGGACAGAGGGTCAG | ~200    | 1.5 | 59 | Brinkmeyer-Langford et al. 2005*             |          |
| Janus kinase 3 (a protein tyrosine kinase, leukocyte)                                                                             | JAK3         | 21        | F: CTGCGGTTGGTCATGGAGTA<br>R: GAAGTCGGCGATCTTGACGT     | 486     | 1.5 | 58 |                                              | BE753801 |
| jun D proto-oncogene                                                                                                              | JUND         | 21        | F: ATCGACATGGACACTCAGGAG<br>R: GCTGAGGACCTTCTGCTTGA    | 210     | 1.5 | 58 | Brinkmeyer-Langford et al. 2005              | CA779483 |
| kinesin heavy chain member 2A                                                                                                     | KIF2A (KIF2) | 21        | F: AGGTTCAAGTGGTGGGATTA<br>R: CATGTAGTTTTCTTTCCCTTCTA  | 548     | 1.5 | 50 | Goh et al. 2007                              |          |
| Kruppel-like factor 2 (lung)                                                                                                      | KLF2         | 21q12-q13 | F: AGAAGCCCTACCACTGCAAC<br>R: CTACATGTGCCGCTTCATG      | 173     | 1.5 | 58 | Brinkmeyer-Langford et al. 2005              | BI132469 |
| microsatellite                                                                                                                    | LEX031       | 21        | F: CCCATTAAGAACTTTTCATCCTG<br>R: GGCAAGCCCCACAAAATTAT  | 252-256 | 2.0 | 58 | Coogle et al. 1996                           | AF075633 |
| microsatellite                                                                                                                    | LEX037       | 21        | F: GGATTCCTCAACCTCCTAAA<br>R: AGGGATAAGTGACCACCAC      | 189-197 | 3.0 | 58 | Coogle et al. 1997                           | AF075639 |
| microsatellite                                                                                                                    | LEX060       | 21        | F: TTGCAGAAGGAGCCAATC<br>R: AAGGCATTTCGAAATCTAAAT      | 145-161 | 3.0 | 58 | Coogle & Bailey 1997                         | AF075667 |
| similar to microtubule associated testis specific serine/threonine protein kinase U6 small nuclear RNA associated (S. cerevisiae) | LOC375449    | 21        | F: CTTGACCACATATTATCCCC<br>R: CTGTCTTCCATCCTCACTC      | 120     | 1.5 | 58 | Goh et al. 2007                              |          |
| mesoderm induction early response 1, family member 3                                                                              | LSM4         | 21        | F: GGATGCCCCGAGTGCTACATT<br>R: GCCCTTCTGCTGCTTCTGCT    | 140     | 4.0 | 50 | Brinkmeyer-Langford et al. 2005              |          |
| myosin X                                                                                                                          | MIER3        | 21        | F: TAACTTCTAACCGGCCTGAG<br>R: GGAGGAAAGCTATCATCCAA     | 253     | 1.5 | 58 |                                              |          |
|                                                                                                                                   | MYO10        | 21        | F: GCCATCAAGATATTCAACTCCCT<br>R: TCTGCTTGATGAGCTGGCAG  | 136     | 1.5 | 55 | Goh et al. 2007                              |          |

|                                                                                      |        |           |                                                                |      |     |    |                                          |          |
|--------------------------------------------------------------------------------------|--------|-----------|----------------------------------------------------------------|------|-----|----|------------------------------------------|----------|
| nicotinamide nucleotide transhydrogenase                                             | NNT    | 21        | F: CCAGATTTTCGGATTTACCTCA<br>R: ATAGGCAACCAGAGACCCACT          | 199  | 1.5 | 55 | Perrocheau et al. 2006                   | DX010536 |
| natriuretic peptide receptor C/guanylate cyclase C                                   | NPR3   | 21q17     | F: AGATGATGCTCGCCCTGTTC<br>R: GCAAGCCTTCCTCCTGGAAG             | 132  | 1.5 | 55 | Milenkovic et al. 2002*; Goh et al. 2007 |          |
| poly (ADP-ribose) polymerase family, member 8                                        | PARP8  | 21        | F: TCCTGCAAAGCCGTAACCTTA<br>R: TCTTGTGCAGACATGATCAGTA          | 998  | 1.5 | 58 |                                          |          |
| phosphodiesterase 4D, cAMP-specific (phosphodiesterase E3 dunce homolog, Drosophila) | PDE4D  | 21q14     | F: TGTTTGTCTGTTTACAACCA<br>R: AAACAAGCTCTAAGGTGACA             | 209  | 1.5 | 58 | Goh et al. 2007*                         |          |
| pelota homolog (Drosophila)                                                          | PELO   | 21        | F: TGGTTATGCAGGAAGGCCTC<br>R: TAGTCGCAGAACTGCTCCCT             | 241  | 1.5 | 58 | Goh et al. 2007                          |          |
| phosphoinositide-3-kinase, regulatory subunit 2                                      | PIK3R2 | 21        | F: AGGGAGAGTACACGCTGAC<br>R: TTGGACACTGGGTAGAGGAG              | 656  | 1.5 | 58 |                                          | AV663221 |
| polo-like kinase 2 (Drosophila)                                                      | PLK2   | 21        | F: TGTGGTACCCCAAATTATCTTTCTC<br>R: TGTCATCCAACTGGGACGA         | 762  | 1.5 | 58 | Goh et al. 2007                          |          |
| polymerase (DNA directed) sigma                                                      | POLS   | 21        | F: CGACATCAGCTTTAACATGGA<br>R: GCAGGAGGAACTGTTTCAGT            | 1216 | 1.5 | 58 | Goh et al. 2007                          |          |
| protein kinase, AMP-activated, alpha 1 catalytic subunit                             | PRKAA1 | 21q16-q17 | F: CCAATTGCATTAAAGAATCATTAGC<br>R: TTTTGTTTTCAAAGATAATACTGGTGA | 175  | 1.5 | 58 | Dranchak et al. 2006*                    |          |
| prolactin receptor                                                                   | PRLR   | 21        | F: ATGTCCAGACTACAAAACCG<br>R: ACATAAAGTGGATCCGAGGA             | 170  | 1.5 | 55 | Goh et al. 2007                          |          |
| regulatory factor X-associated                                                       | RFXANK | 21        | F: TGTCCATCCACCAGCTTGCA<br>R: GGCTTGTTGATGAGGTTGT              | 300  | 1.5 | 58 | Brinkmeyer-Langford et al. 2005          | CK459113 |

|                                                                                          |         |               |                                                      |         |     |    |                                                 |          |
|------------------------------------------------------------------------------------------|---------|---------------|------------------------------------------------------|---------|-----|----|-------------------------------------------------|----------|
| ankyrin-<br>containing<br>protein<br>succinate<br>dehydrogenase<br>complex, subunit<br>A | SDHA    | 21q19         | F: CACTACATGACAGAGCAGGCC<br>R: ACCAAAGGCACGCTGGTAG   | 445     | 1.5 | 58 | Goh et al. 2007*                                |          |
| sema domain<br>(semaphorin) 5A                                                           | SEMA5A  | 21            | F: AACCTGACGGAGATCCATGAC<br>R: TTGGAGTTGTACTGTGCGGTG | 197     | 1.5 | 58 | Goh et al. 2007                                 |          |
| splicing factor,<br>arginine/serine-<br>rich 14                                          | SFRS14  | 21            | F: CCCAACTTTTCCAGACTCTC<br>R: ACTCTGGGTGTTTTCAAAGC   | 151     | 1.5 | 58 |                                                 | CB450106 |
| microsatellite                                                                           | SGCV14  | 21q13         | F: CCCCAGTGGTTCCATTTAGATGT<br>R: GGGGAGAGCATTTTGGTGA | 188     | 3.0 | 58 | Godard et al. 1997*                             | U90593   |
| microsatellite                                                                           | SGCV16  | 21q13         | F: AATTCTCAAATGGTTCAGTGA<br>R: CTCCCTCCCTTCTCTCTA    | 190     | 2.0 | 58 | Godard et al. 1997*                             | U90594   |
| S-phase kinase-<br>associated<br>protein 2                                               | SKP2    | 21            | F: CCGACCAGAGTAGCAACGTT<br>R: CATTCCTTTGCTCTTCAGC    | 198     | 1.5 | 58 | Goh et al. 2007                                 |          |
| solute carrier<br>family 27 (fatty<br>acid transporter),<br>member 1                     | SLC27A1 | 21q13-<br>q14 | F: TTCAACAGCCGCATCCTGC<br>R: CTGTGGGCGATCTTCTTGCT    | ~305    | 1.5 | 60 | Brinkmeyer-<br>Langford et al.<br>2005*         | CK837240 |
| threonyl-tRNA<br>synthetase                                                              | TARS    | 21            | F: ACCACCAGTGTGCAACAATAC<br>R: ACCCCAAGATGGCTCTATGG  | 284     | 1.5 | 58 | Goh et al. 2007                                 |          |
| microsatellite                                                                           | TKY021  | 21q13         | F: AGGTGAACCCAGAGAGTCC<br>R: AGTGAGGCCTCGGTTGGGAG    | 117-132 | 2.0 | 58 | Kakoi et al. 1999;<br>Chowdhary et al.<br>2003* | AB048331 |
| microsatellite                                                                           | TKY280  | 21            | F: GAGGAGACCAAAATAACAGG<br>R: ACTCCCTGCTTTGCACTCTG   | 309-321 | 3.0 | 58 | Tozaki et al. 2000b                             | AB033931 |
| microsatellite                                                                           | TKY296  | 21            | F: CTCTCACTTCCAAGACACTC<br>R: ATCAAACGTACAGGAAGAGC   | 254-273 | 1.5 | 58 | Tozaki et al. 2000c                             |          |
| microsatellite                                                                           | TKY306  | 21            | F: GTTTGTGGTGCTTTGTAGC<br>R: CTCTGCACTTGCTGAACATC    | 266-279 | 1.5 | 56 | Tozaki et al. 2000c                             |          |
| microsatellite                                                                           | TKY355  | 21            | F: GTTCTGTACCTTGATGGTAG<br>R: TGGACATCTTTCCACAAGC    | 275-283 | 1.5 | 58 | Tozaki et al. 2001                              |          |

|                                              |                       |       |                                                            |         |     |    |                                  |          |
|----------------------------------------------|-----------------------|-------|------------------------------------------------------------|---------|-----|----|----------------------------------|----------|
| microsatellite                               | TKY418                | 21    | F: TGAAATCAGCTAGGAGACTG<br>R: TCTGTCCTCAACTCTGATTG         | 124     | 2.0 | 58 |                                  | AB103636 |
| microsatellite                               | TKY520                | 21    | F: GCAGTTTCTGGCATTGTGTG<br>R: TGATGTGAAACGTGTGCTTG         | 182-184 | 1.5 | 58 | Tozaki et al. 2004               |          |
| microsatellite                               | TKY623                | 21    | F: CAGTGTGGGTGGGCTTTATC<br>R: ACCACTAGGGTGTGCATGTG         | 263-281 | 1.5 | 60 | Tozaki et al. 2004               |          |
| microsatellite                               | TKY671                | 21    | F: AGGCAACATGAGAAGGCACA<br>R: ATAGCACCTGTTCCCTGGAG         | 100-116 | 1.5 | 58 | Tozaki et al. 2004               |          |
| microsatellite                               | TKY677                | 21    | F: ATGGAAATTGCCTGATTGGA<br>R: AAAGGAAGATTGGCAACAGA         | 116     | 2.0 | 58 |                                  | AB103895 |
| microsatellite                               | TKY678                | 21    | F: TAAAAGAAGGGGTAATGGG<br>R: TGTGGTGCTTGTTCAGCA            | 207     | 2.0 | 58 |                                  | AB103896 |
| microsatellite                               | TKY709                | 21    | F: CTTTTCTGGGGCTGTGTGTC<br>R: CAAGGGGGAAGATGATGATG         | 121-143 | 1.5 | 56 | Tozaki et al. 2004               |          |
| microsatellite                               | TKY721                | 21    | F: TCAAATGGTTCAGTGAAAATGG<br>R: CCTCCCTCCCTTCTTCTATT       | 143-183 | 2.5 | 56 | Tozaki et al. 2004               |          |
| microsatellite                               | TKY806                | 21    | F: TGGAAGTGTGATGATGTTGC<br>R: TCTTTCTTCCCTTCCGAGAG         | 180     | 2.0 | 58 | Tozaki et al. 2004               | AB104024 |
| microsatellite                               | TKY824                | 21    | F: AATGGTATTTGCAATAGATTTGGG<br>R: GCAGAAAACAGTTTGATAAAATGC | 161     | 2.0 | 58 |                                  | AB104042 |
| microsatellite                               | TKY868                | 21    | F: TGGGCTCAGCCCAGACAG<br>R: GTGGTTAAGGTAGTTTCAGAG          | 177     | 2.0 | 58 |                                  | AB104086 |
| microsatellite                               | TKY907                | 21    | F: CTTGTCGTCACAAATGGCAG<br>R: ACCTGCCAAAGAATGAATGG         | 125     | 2.0 | 58 |                                  | AB104125 |
| microsatellite                               | TKY1018               | 21    | F: TCAAAAAGGCAGAAAGGGTC<br>R: TCTTGTTTCATGCAGCTCTAC        | 175     | 2.0 | 58 |                                  | AB104236 |
| microsatellite                               | TKY2049               | 21    | F: TTAAAGGGCAGAGGGTACA<br>R: ACAGTCAAGCACAGGCTTC           | 223     | 1.5 | 60 | Tozaki et al. 2007               | AB215992 |
| triple functional domain (PTPRF interacting) | TRIO                  | 21    | F: GTCCAACCTCAACACGACCTACC<br>R: AGGTCTCTTCCACGCTGTCTG     | 181     | 1.5 | 58 | Goh et al. 2007                  |          |
| testis-specific serine kinase 6              | TSSK6 ( <i>SSTK</i> ) | 21q13 | F: TCAAGCTTACCGACTTCGGC<br>R: GACCATGACGTAGAGCACGA         | 170     | 1.5 | 60 | Brinkmeyer-Langford et al. 2005* | BI344525 |
| tetratricopeptide repeat domain 33           | TTC33 ( <i>OSRF</i> ) | 21    | F: TTTCAAGTAGCCCTTCACATC<br>R: ACAAACAGCAACAATCTCATCA      | 198     | 1.5 | 58 | Goh et al. 2007                  |          |

|                |         |    |                                                           |      |     |    |                       |          |
|----------------|---------|----|-----------------------------------------------------------|------|-----|----|-----------------------|----------|
| microsatellite | UMNe139 | 21 | F: AGACACAGGTTTAGGTGGATGC<br>R: GATCAAGCACATAAGGGACAC     | 100  | 1.5 | 58 | Wagner et al. 2004a   | AY391300 |
| microsatellite | UMNe147 | 21 | F: CAGACCTACTCCAGTCATCAGC<br>R: AAACAAAGAGACTTGAAGTGGC    | 180  | 1.5 | 58 | Wagner et al. 2004a   | AY391302 |
| microsatellite | UMNe179 | 21 | F: GATTCAGGAGTTTGTGTGATGG<br>R: AGAACTTCTATTACATGGTTCACAC | 106  | 2.0 | 58 |                       |          |
| microsatellite | UMNe206 | 21 | F: GATCAAGCACATAAGGGACAC<br>R: CATATCCATAGCTTTTTGACCC     | 154  | 2.0 | 58 | Mickelson et al. 2003 | AF536289 |
| microsatellite | UMNe229 | 21 | F: CTTCTCTGGACAAAGGGGTG<br>R: CATGAATTTGCCAGTTTGATG       | 123  | 2.0 | 58 | Mickelson et al. 2003 | AF536303 |
| microsatellite | UMNe327 | 21 | F: TTTTCCTTCCTCATTGGTGC<br>R: GAAATGCAGGGCTAAGGATG        | 157  | 2.0 | 58 | Wagner et al. 2004a   | AY391339 |
| microsatellite | UMNe432 | 21 | F: CTGACGTCACTGGCAACG<br>R: GCGGAGTCCCACATAACG            | 282  | 1.5 | 58 | Mickelson et al. 2004 | AY731394 |
| microsatellite | UMNe464 | 21 | F: GTTCCATTTGCGAAAATTTAGC<br>R: CGTTTGCTTCTAAGCCGTTT      | ~300 | 1.5 | 58 | Wagner et al. 2004b   | AY464492 |
| microsatellite | UMNe509 | 21 | F: GGGCATTCTCAATCTTTAGGC<br>R: GAGGATGCAAAGGAATAAGGC      | ~200 | 1.5 | 55 | Wagner et al. 2004b   | AY464511 |
| microsatellite | UMNe539 | 21 | F: GGTTTCCAAATGAGTGGTTTG<br>R: CAATTTAAGATTCAATTGGGGAG    | 126  | 1.5 | 58 | Mickelson et al. 2004 | AY731410 |
| microsatellite | UMNe564 | 21 | F: GAATACAGGGGCTTTTTCTGC<br>R: TTCTGCATCTTGATTGCAGTG      | ~200 | 1.5 | 58 | Wagner et al. 2004b   | AY464530 |
| microsatellite | UMNe603 | 21 | F: TTGTCCTGAGTGTTTCATTCCC<br>R: AAGCTGCAAAAAGATAGATGCC    | 186  | 1.5 | 58 |                       |          |

| Name                                                                                  | Symbol            | Horse chr.    | Primers                                                   | Product size (bp) | MgCl <sub>2</sub> (mM) | T <sub>a</sub> | Reference                                             | Accession No |
|---------------------------------------------------------------------------------------|-------------------|---------------|-----------------------------------------------------------|-------------------|------------------------|----------------|-------------------------------------------------------|--------------|
| sequence tagged site                                                                  | 22STS01           | 22            | F: GAAACATACCGAGGCACCAC<br>R: GCAGGGGCTCTAGAACTCAG        | 500               | 1.5                    | 60             |                                                       | BI961508     |
| acyl-CoA synthetase short-chain family member 1                                       | ACSS1<br>(ACAS2L) | 22            | F: AAGTTTCTAGATACAAAAGGCAGAGG<br>R: TCATTAGCTTCCCTGAACGAC | 517               | 1.5                    | 60             |                                                       | BM781307     |
| adenosine deaminase                                                                   | ADA               | 22            | F: AGGCAGGGTTAATGTGACCA<br>R: GGGAAAGCTTCAAGATGGTG        | 219               | 2.0                    | 58             | Caetano et al. 1999                                   | AF135790     |
| adhesion regulating molecule 1                                                        | ADRM1             | 22            | F: CTGAGATCATGGCACCTATCC<br>R: CTTGTTGGCTGCCTCCAC         | 400               | 1.5                    | 60             |                                                       | BM780744     |
| S-adenosylhomocysteine hydrolase                                                      | AHCY              | 22q15-q16prox | F: GGTTTAAGAGAATGCCCAGCTC<br>R: TACCTGGCCTGTGGACTTGATA    | 161               | 3.0                    | 58             | Chowdhary et al. 2003; Gustafson-Seabury et al. 2005* |              |
| microsatellite                                                                        | AHT031            | 22q18-q19     | F: TCTTGCTGCATTTCTTGG<br>R: TGCAGGAAAAGTTTGATGACC         | 109-123           | 2.0                    | 58             | Swinburne et al. 2000                                 | AJ271516     |
| microsatellite                                                                        | AHT110            | 22            | F: TATGCCACATACATCTTCCTGC<br>R: TTCTCCCGAGCACACTCC        | 203               | 1.5                    | 60             |                                                       |              |
| agouti signaling protein (mouse)                                                      | ASIP              | 22q15-q16prox | F: GCAGCCAGGCTAATGAGAAC<br>R: ACAAAAAGGAGCAAAGCCAGA       | 198               | 2.0                    | 58             | Godard et al. 1998*; Chowdhary et al. 2003            | AF179635     |
| ATP synthase, H <sup>+</sup> -transporting, mitochondrial F1 complex, epsilon subunit | ATP5E             | 22q19         | F: GGAAGTCATTAGCTCCTGTCA<br>R: CATGAAGAGCCTGGAACAAGT      | ~300              | 1.5                    | 62             | Gustafson-Seabury et al. 2005                         |              |
| ATPase, Class II, type 9A                                                             | ATP9A             | 22q18         | F: GTCTTGGCTCTTAACGCTCAC<br>R: TCGTGGCTTGTTTGTTGTAG       | ~160              | 1.5                    | 58             | Gustafson-Seabury et al. 2005                         |              |
| attractin                                                                             | ATRN              | 22            | F: CCACAGCAGATGCGTTAATC<br>R: CTGACACTTTCCCCCATTG         | 122               | 1.5                    | 59             |                                                       | AW260909     |

|                                     |                                 |                   |                                                            |         |     |    |                                                        |          |
|-------------------------------------|---------------------------------|-------------------|------------------------------------------------------------|---------|-----|----|--------------------------------------------------------|----------|
| BCL2-like 1                         | BCL2L1                          | 22                | F: TCCCTTCAGAACCTTATCTTGG<br>R: TCCCGGAAGAGTTCATTAC        | 519     | 1.5 | 60 |                                                        | BI960951 |
| bone morphogenetic protein 2        | BMP2                            | 22q14dist-q15prox | F: AACTCCTCTGCATGGTGTGT<br>R: TGTGGGGCCTAAGTTCTCTA         | 204     | 1.5 | 58 | Gustafson-Seabury et al. 2005                          |          |
| BTB (POZ) domain containing 3       | BTBD3                           | 22                | F: AACATGGCATGAAGGCTAGTG<br>R: AAGCACTCTGATGCACAAGG        | 382     | 1.5 | 60 |                                                        | CX604284 |
| chromosome 20 open reading frame 7  | C20orf7                         | 22                | F: CAAGAACCTCGGCCTCAG<br>R: TCCTCCTTCAGGTAGTCAAACCTTC      | 159     | 1.5 | 59 |                                                        | CX598272 |
| chromosome 20 open reading frame 24 | C20orf24<br>( <i>HEST20-5</i> ) | 22                | F: AGCTGCATGGAACCTGGA<br>R: CGACAGCTCCAATCAGCA             | 198     | 1.5 | 58 | Gustafson-Seabury et al. 2005                          |          |
| chromosome 20 open reading frame 30 | C20orf30                        | 22                | F: TTTGATGACTAGCACCCACATC<br>R: CCCATAACACTGCTACTCTCCC     | 289     | 1.5 | 59 |                                                        | CX600131 |
| chromosome 20 open reading frame 39 | C20orf39<br>( <i>FLJ14220</i> ) | 22q13             | F: CAAGGGGGACTTCCACCAG<br>R: GCTCATAGGTGGTTGCTCTTG         | 144     | 1.5 | 55 | Perrocheau et al. 2006                                 | DX010628 |
| cadherin 4                          | CDH4                            | 22q19             | F: GGCCAGGAAATGAGTGTCTA<br>R: AATCAGCGTCAATGCTTTTC         | 172     | 1.5 | 58 | Gustafson-Seabury et al. 2005                          |          |
| centromere protein B, 80kDa         | CENPB                           | 22q14dist-q15prox | F: CAGGAAGGTCTCGGCATC<br>R: GTATGAAGGAGGGCACATCA           | 285     | 1.5 | 60 | Gustafson-Seabury et al. 2005                          |          |
| microsatellite                      | COR001                          | 22                | F: GGCAGCATCCACATAAAACAG<br>R: GCTCACTATTACCACGATGATTGATTC | 123-137 | 2.0 | 58 | Hopman et al. 1999                                     | AF083444 |
| microsatellite                      | COR016                          | 22                | F: CAGCTCAGTAGATGATTGTCCA<br>R: GCAAAGACAAGGAGGTTAAGTT     | 177-196 | 2.0 | 58 | Hopman et al. 1999                                     | AF083459 |
| microsatellite                      | COR022                          | 22q15-q16prox     | F: AAGACGTGATGGGAAATCAA<br>R: AGAAAGTTTTCAAATGTGCCA        | 254-264 | 2.0 | 58 | Murphie et al. 1999;<br>Gustafson-Seabury et al. 2005* | AF101391 |

|                                                             |                          |                       |                                                      |         |     |    |                                                      |          |
|-------------------------------------------------------------|--------------------------|-----------------------|------------------------------------------------------|---------|-----|----|------------------------------------------------------|----------|
| microsatellite                                              | COR107                   | 22                    | F: TCTCAAGTATTGATTTTGGGG<br>R: TGCAGAAGCTATTTCTGGTG  | 260-272 | 1.5 | 56 | Swinburne et al.<br>2005                             |          |
| carboxypeptidase<br>X (M14 family),<br>member 1             | CPXM1<br>( <i>CPXM</i> ) | 22q14dist-<br>q15prox | F: ACGTGGCAACACATCTCCTA<br>R: TGGTGATCTTCATTTCGTTCTC | 167     | 1.5 | 58 | Gustafson-<br>Seabury et al.<br>2005                 |          |
| cleavage<br>stimulation factor,<br>3' pre-RNA,<br>subunit 1 | CSTF1                    | 22                    | F: ACCATCAGTCTCTGCTGCTG<br>R: CCAAAGCTGGCACAATGAC    | 273     | 1.5 | 60 |                                                      | CX600101 |
| cathepsin A                                                 | CTSA<br>( <i>PPGB</i> )  | 22q17                 | F: GAAAGGTCCCCTCAAGGAC<br>R: GCGTGAACCAAGATCAGAAC    | 112     | 1.5 | 58 | Gustafson-<br>Seabury et al.<br>2005                 |          |
| DEAD (Asp-Glu-<br>Ala-Asp) box<br>polypeptide 27            | DDX27                    | 22                    | F: TGAGAAAGTCCGAAAGAAAAGG<br>R: CTTCCCCTTCAAGGTCTTCC | 380     | 1.5 | 60 |                                                      | CD528389 |
| docking protein 5                                           | DOK5                     | 22q18                 | F: GTTTGCTCTCTTCCTTCATGC<br>R: TGAGAAGCTACAACCAACCAA | ~200    | 1.5 | 58 | Gustafson-<br>Seabury et al.<br>2005                 |          |
| destrin                                                     | DSTN                     | 22q12-<br>q13         | F: CAAGCACTAAGCTGGGAAGTA<br>R: CGACGGAGTAGGTCACAAAG  | 194     | 1.5 | 58 | Gustafson-<br>Seabury et al.<br>2005                 |          |
| endothelin 3                                                | EDN3                     | 22                    | F: GTCCAAGTCCCAGAACCC<br>R: TGATCCAGATGATGTCCAG      | 162     | 2.0 | 58 | Chowdhary et<br>al. 2003                             |          |
| erythrocyte<br>membrane protein<br>band 4.1-like 1          | EPB41L1                  | 22                    | F: CAAGGATCGAGAAGCGAATC<br>R: GGCTTCTTGTCCTCTCCTC    | 500     | 1.5 | 60 |                                                      | CX603690 |
| eyes absent<br>homolog 2<br>( <i>Drosophila</i> )           | EYA2                     | 22q18                 | F: CGGGTCTTACTCAGCTTCAG<br>R: GCCTTATACGTGTCTGTCTGC  | 191     | 1.5 | 58 | Gustafson-<br>Seabury et al.<br>2005                 |          |
| FK506 binding<br>protein 1A, 12kDa                          | FKBP1A                   | 22                    | F: AGCCATCATGACAAATCCTTG<br>R: CCAGGAGACTCGGAGATCAG  | 116     | 1.5 | 55 | Perrocheau et al.<br>2005                            | AY817466 |
| GNAS complex<br>locus                                       | GNAS<br>( <i>GNAS1</i> ) | 22                    | F: AAGCAGGTTTAACGCACAGG<br>R: GGCCCTGAACCTCTTCAA     | 199     | 2.0 | 58 | Caetano et al.<br>1999*;<br>Chowdhary et<br>al. 2003 | AF134221 |



|                                                                  |         |               |                                                              |         |     |    |                                        |          |
|------------------------------------------------------------------|---------|---------------|--------------------------------------------------------------|---------|-----|----|----------------------------------------|----------|
| hydroxyacid oxidase 1                                            | HAO1    | 22q14         | F: CCATTGTCATTTGGACCTGT<br>R: TGCTATTGGGTAGTTTATGCAC         | 189     | 2.0 | 58 | Gustafson-Seabury et al. 2005          |          |
| histidyl-tRNA synthetase 2                                       | HARS2   | 22            | F: AACCTGCGTGTGTTTGAGG<br>R: ATGAGCTCCGGCCTGTAAG             | 215     | 1.5 | 60 |                                        | CX601399 |
| histocompatibility (minor) 13                                    | HM13    | 22            | F: GAGTTTGACACCAAGGACCTG<br>R: CCAGAAGACGTCATAGATAAAGAGC     | 400     | 1.5 | 60 |                                        | BM735454 |
| microsatellite                                                   | HMS053  | 22            | F: TCATTACTGATGACATTTACTCAGC<br>R: TGTTATAAATCTGAGATAGTGATGC | 196-198 | 1.5 | 54 | Swinburne et al. 2005                  |          |
| microsatellite                                                   | HMS47   | 22q18         | F: CCTGCTGAGGACCTTGGAAGCT<br>R: ATGTATTTTCAAGCTAATATCTGCC    | 196     | 3.0 | 58 | Godard et al. 1997, Godard et al. 1998 | U89815   |
| microsatellite                                                   | HTG14   | 22q14         | F: CCAGTCTAAGTTTGTGGCTAGAA<br>R: CAAAGGTGAGTGATGGATGGAAGC    | 141     | 2.0 | 58 | Marklund et al. 1994                   | AF169298 |
| microsatellite                                                   | HTG21   | 22            | F: ATTACTTCCTCCAGGTATCTCAG<br>R: AGGCAGGGCTGGGAGACGT         | 151     | 3.0 | 58 | Lindgren et al. 1999                   |          |
| itchy homolog E3 ubiquitin protein ligase (mouse)                | ITCH    | 22            | F: GACGTTTCTGTTGGGAACTG<br>R: AAAACAAATGGCTAAACCAAGG         | 248     | 1.5 | 58 | Gustafson-Seabury et al. 2005          |          |
| integrin beta 4 binding protein                                  | ITGB4BP | 22q15-q16prox | F: CAGCAAGGTATCCAGAGCAT<br>R: AGGGAATATGGGTGACGAGT           | 284     | 1.5 | 60 | Gustafson-Seabury et al. 2005          |          |
| inosine triphosphatase jagged 1 (Alagille syndrome)              | ITPA    | 22            | F: TGCCAGAGTACCAGGGAGAG<br>R: GAGGGCATTGAAGCACAGAC           | 710     | 1.5 | 60 |                                        | CX601964 |
|                                                                  | JAG1    | 22q14         | F: CCGCAGACGTTTCGAGGAA<br>R: TCACAGTGTGACACGGCAGT            | 258     | 2.0 | 62 | Gustafson-Seabury et al. 2005          |          |
| kinesin family member 3B                                         | KIF3B   | 22            | F: GCCACTCTCTGCTTTTCCTG<br>R: TTGCGCTACACACAATAGCC           | 283     | 1.5 | 60 |                                        | CX596463 |
| microsatellite                                                   | LEX002  | 22            | F: AAAAGGAAGACTGGCGACAG<br>R: GGTGGGGGAAAGAATGGT             | 127-131 | 3.0 | 58 | Coogle et al. 1996                     | AF075606 |
| v-maf musculoaponeurotic fibrosarcoma oncogene homolog B (avian) | MAFB    | 22            | F: TCCTGGCTTCCTGAACTTTG<br>R: TCGAGCAGGCAATAAAACTG           | 272     | 1.5 | 60 |                                        | BM735497 |

|                                                            |                             |                   |                                                       |      |     |    |                               |          |
|------------------------------------------------------------|-----------------------------|-------------------|-------------------------------------------------------|------|-----|----|-------------------------------|----------|
| matrilin 4                                                 | MATN4                       | 22                | F: TCGTGGACTTCCTAGACGTG<br>R: TGCTGCCTTTAAGGTTCTCC    | 550  | 1.5 | 59 |                               | CX598714 |
| matrix metalloproteinase 9                                 | MMP9                        | 22q17             | F: GTGGGTGTACACAGGCAAGTC<br>R: TGCTGAACAGCAGCACCTTAC  | 125  | 1.5 | 55 | Perrocheau et al. 2006        | DX010527 |
| myosin, light chain 9, regulatory                          | MYL9                        | 22                | F: GCCAAGGACAAAGACGACTA<br>R: CCTGTGTTACATTGGCTGTG    | 230  | 1.5 | 58 |                               |          |
| N-ethylmaleimide-sensitive factor attachment protein, beta | NAPB                        | 22q12-q13         | F: GGTGAACACACCCACACAG<br>R: CGGGGAAACACTTATGTACC     | 172  | 1.5 | 60 | Gustafson-Seabury et al. 2005 |          |
| p21(CDKN1A)-activated kinase 7                             | PAK7<br>( <i>HEST20-2</i> ) | 22                | F: AGCACAACTCTCCTATGTCTGG<br>R: AAGGCCATGAGAATTCCAGTC | 279  | 2.0 | 58 | Gustafson-Seabury et al. 2005 |          |
| prodynorphin                                               | PDYN                        | 22q15-q16prox     | F: TTGGAATAGGACGTTTGAGC<br>R: TCTTGTCTCATGGCCTCTGTA   | ~210 | 1.5 | 62 | Gustafson-Seabury et al. 2005 |          |
| phosphatidylinositol glycan anchor biosynthesis, class T   | PIGT                        | 22                | F: GGCCTGCTCAAGTGGAC<br>R: AAGAGGGGGCTCTCTTCC         | 400  | 1.5 | 58 |                               | CX604421 |
| phospholipase C, beta 1                                    | PLCB1                       | 22                | F: CAACCATACAAAGCCCCATC<br>R: GCTCAGTTTTACCAAATGCC    | 227  | 1.5 | 58 | Gustafson-Seabury et al. 2005 |          |
| phospholipase C, beta 4                                    | PLCB4                       | 22                | F: CGCAGACCAGCAACAGTAGT<br>R: TCCATGGAATTTGTGTCCAG    | 108  | 2.0 | 58 | Gustafson-Seabury et al. 2005 | AY011799 |
| phospholipase C, gamma 1                                   | PLCG1                       | <b>22q16-17</b>   | F: GCTTTGGCCACAATTTTCAT<br>R: TGCCCCTAGTGAGAAGCTGT    | 242  | 1.5 | 58 |                               |          |
| prion protein                                              | PRNP                        | 22q14dist-q15prox | F: CTTTTGGTGGAATTTTATAGGA<br>R: ACTCAACAGCACATTGAAAGG | 493  | 1.5 | 58 | Gustafson-Seabury et al. 2005 |          |
| protein C receptor, endothelial                            | PROCR                       | 22                | F: CCTACACCCTGCAGAAGCTC<br>R: TGGGAGAAGAAAGGAGTTGC    | 620  | 1.5 | 60 |                               | CX601326 |
| proteasome, subunit, alpha type, 7                         | PSMA7                       | 22q19             | F: GAATCGGTCAGGAAGAGAGG<br>R: GAACGTGCAGGGACTTTG      | ~220 | 1.5 | 58 | Gustafson-Seabury et al. 2005 |          |

|                                                   |                         |               |                                                         |      |     |          |                               |          |
|---------------------------------------------------|-------------------------|---------------|---------------------------------------------------------|------|-----|----------|-------------------------------|----------|
| proteasome, inhibitor subunit 1                   | PSMF1                   | 22            | F: GGCTTGGAGGTGCTGTTC<br>R: CTCCCAAGCCGTAGTAGCC         | 112  | 1.5 | 59       |                               | CX602082 |
| protein tyrosine phosphatase, non-receptor type 1 | PTPN1                   | 22            | F: GCCTCGTTCCTGAACCTTCTC<br>R: CACAGCCAGGTAGGAGAAGC     | 800  | 1.5 | 60       |                               | CX595178 |
| protein tyrosine phosphatase, receptor type, T    | PTPRT                   | 22q16-q17prox | F: GGATGCTTCTAACAGCCTTG<br>R: GTTGTGGTCTGGGTCAAGTC      | 171  | 1.5 | 60       | Gustafson-Seabury et al. 2005 |          |
| RNA binding protein, autoantigenic                | RALY                    | 22q15-q16prox | F: CCTTCTGCTCACTAATTTTATTCC<br>R: CACTACGCACTGGCAAGG    | 230  | 1.5 | 58       | Gustafson-Seabury et al. 2005 |          |
| ribosomal protein S21                             | RPS21                   | 22q19         | F: GAATAGCCAGCTTCTCTGACA<br>R: GACACACCAAAGACACAAGG     | ~210 | 1.5 | 58       | Gustafson-Seabury et al. 2005 |          |
| ribosome binding protein 1 homolog 180kDa (dog)   | RRBP1                   | 22            | F: TGGTCTTTGGTGGATTTATGG<br>R: CAGGAGCAATGACCACAGG      | 327  | 1.5 | 60       |                               | CX600901 |
| Sec23 homolog B ( <i>S. cerevisiae</i> )          | SEC23B                  | 22q12-q13     | F: GGAATAAGTGGAAACCAAGTTC<br>R: CTTACTATGGAGGTGAGTGAGTG | 208  | 2.0 | 60       | Gustafson-Seabury et al. 2005 |          |
| serine incorporator 3                             | SERINC3 ( <i>TDE1</i> ) | 22q15-q16prox | F: AGACCCTTCTCCCTCTCAAG<br>R: CCTCCACCACATCGTATCAG      | 190  | 1.5 | 60<br>62 | Gustafson-Seabury et al. 2005 |          |
| splicing factor, arginine/serine-rich 6           | SFRS6                   | 22            | F: TCCACGTTTATACTTGGCCTCT<br>R: TGCCACCATTTCTTTAGAACCT  | 117  | 1.5 | 59       |                               | CX596991 |
| microsatellite                                    | SGCV01                  | 22            | F: AGTCACCACCACTCACCTTGT<br>R: CCAACACAGGATACGGATGA     | 187  | 2.0 | 58       | Godard et al. 1997            | U90584   |
| microsatellite                                    | SGCV19                  | 22q19         | F: GCCCCACCTGCTCCACC<br>R: GGGGCAAAGTGGAATCC            | 143  | 2.0 | 58       | Godard et al. 1997            | U90597   |
| serum/glucocorticoid regulated kinase 2           | SGK2                    | 22q15-q16prox | F: GAAGAGAAGGGGGACAGACT<br>R: CCTCAGAACCACCTGGAAG       | 206  | 1.5 | 60       | Gustafson-Seabury et al. 2005 |          |
| signal-regulatory protein beta 1                  | SIRPB1 ( <i>SIRPB</i> ) | 22            | F: TCCTCCTAGGCACAAAGGTG<br>R: AAGGCGATGGATGAGAGCTA      | 1150 | 1.5 | 60       |                               | CD528661 |

|                                                       |                             |                   |                                                      |      |     |          |                               |          |
|-------------------------------------------------------|-----------------------------|-------------------|------------------------------------------------------|------|-----|----------|-------------------------------|----------|
| solute carrier family 32, member 1                    | SLC32A1<br>( <i>VIAAT</i> ) | 22q15-q16prox     | F: GGCAGCATGGTTGTAATAGTC<br>R: TGTATGTATTCTTCGGGGTCA | 178  | 1.5 | 58       | Gustafson-Seabury et al. 2005 |          |
| snail homolog 1 (Drosophila)                          | SNAI1                       | 22q18             | F: GCTAGGAAGTGGTGAAGCTG<br>R: TGTGGAGTAAAACCCTGGAA   | 321  | 2.0 | 58       | Gustafson-Seabury et al. 2005 |          |
| small nuclear ribonucleoprotein polypeptides B and B1 | SNRPB<br>( <i>SNRPB1</i> )  | 22                | F: AAATGTTCTCTCTCCCAGCC<br>R: AATGCCCAATTCCCACCTTC   | 110  | 1.5 | 58       | Gustafson-Seabury et al. 2005 |          |
| small nuclear ribonucleoprotein polypeptide B         | SNRPB2                      | 22q12-q13         | F: TGACCTTGGGGTCTATTTGT<br>R: GGCGTATCGGAGATCATAAA   | 239  | 2.0 | 58       | Gustafson-Seabury et al. 2005 |          |
| syntrophin, alpha 1                                   | SNTA1                       | 22q15-q16prox     | F: CCTTTCTGCGCTTATTTTCA<br>R: GGGTAAATCCGAACCTTGACA  | 383  | 1.5 | 60       | Gustafson-Seabury et al. 2005 |          |
| SRY-box 18                                            | SOX18                       | 22                | F: CGAGTTCGACCAGTACCTCAA<br>R: GATGCAGGCGCTGTAGTAGAC | 173  | 1.5 | 55       | Perrocheau et al. 2005        | AY817485 |
| v-src sarcoma viral oncogene homolog (avian)          | SRC                         | 22                | F: TCACCTTGGGAAAACACAC<br>R: AGTGGATGGGGACCACAAAG    | 158  | 1.5 | 58       | Gustafson-Seabury et al. 2005 |          |
| TAF4 RNA polymerase II                                | TAF4                        | 22q19             | F: TGGGAGGTAGGCAGCAAGT<br>R: TAACGGTCAGGGATGGAAG     | ~290 | 1.5 | 58       | Gustafson-Seabury et al. 2005 |          |
| transcription factor 15                               | TCF15                       | 22q13dist-q14prox | F: CTGCAAGAGAGATGAGGAACA<br>R: GCCGGAACGTAAGTGTGAC   | ~200 | 1.5 | 58       | Gustafson-Seabury et al. 2005 |          |
| transcription factor-like 5                           | TCFL5                       | 22                | F: CTCTCATTCGACATCCATCTGA<br>R: GCAATCCAATATCCTGGTG  | 500  | 3.0 | 50       | Gustafson-Seabury et al. 2005 |          |
| TGFB-induced factor 2                                 | TGIF2<br>( <i>DAP4</i> )    | 22                | F: GGTTCGCCTCACAACATAAAC<br>R: ACATGGCAGCTTCAAGGTTA  | 288  | 4.0 | TD<br>60 | Gustafson-Seabury et al. 2005 |          |
| transglutaminase 2                                    | TGM2                        | 22                | F: GCTGGTCACTAACCAACAAGG<br>R: GTGGCTCAAAGGCACACC    | 411  | 1.5 | 60       |                               | BM780537 |
| transglutaminase 3                                    | TGM3                        | 22                | F: GCTGCTTGCTGACTTCTCCT<br>R: GCAAACAGTCCAGACCGACT   | 450  | 1.5 | 60       |                               | BM735536 |

|                          |         |                             |                                                     |          |     |    |                                      |          |
|--------------------------|---------|-----------------------------|-----------------------------------------------------|----------|-----|----|--------------------------------------|----------|
| TH1-like<br>(Drosophila) | TH1L    | 22                          | F: CAGTGGTAGCAATGGGTGTG<br>R: TTAACAAGCAGCTGCAGGAC  | 500      | 1.5 | 60 |                                      | CD535792 |
| microsatellite           | TKY285  | 22                          | F: ACCAATGGTAAACATGGCAG<br>R: CTGAAGAGGCAAGGAAAAGG  | 164 -174 | 2.0 | 58 | Tozaki et al.<br>2000b               | AB033936 |
| microsatellite           | TKY308  | 22q14<br>(prox to<br>HTG14) | F: GATCGCGCGCACGCGAGCGC<br>R: GTTAGTCTTAGTGATGTGC   | 99-125   | 1.5 | 56 | Tozaki et al.<br>2000c               | AB034617 |
| microsatellite           | TKY345  | 22                          | F: GTCACAGTAAGGCTTACATTC<br>R: TTGATTGAGAATGGAGAGCG | 152-172  | 1.5 | 56 | Tozaki et al.<br>2001                | AB044846 |
| microsatellite           | TKY498  | 22                          | F: GGTGGGAGCATTATCTTTGC<br>R: CTGTCTTTGTGCGTTTGGAG  | 274-276  | 1.5 | 58 | Gustafson-<br>Seabury et al.<br>2005 | AB103716 |
| microsatellite           | TKY548  | 22                          | F: CAGCAAGACGTCTGTCCATT<br>R: TACCCTGGGACTCATGCTCT  | 194-200  | 1.5 | 55 | Gustafson-<br>Seabury et al.<br>2005 | AB103766 |
| microsatellite           | TKY554  | 22                          | F: GGCCTTCCTGACTCCAATTT<br>R: AGCGTTTGCTGAAACCCATA  | 259-263  | 1.5 | 58 | Gustafson-<br>Seabury et al.<br>2005 | AB103772 |
| microsatellite           | TKY560  | 22                          | F: ATCCACCCTCTGCTCCTCTC<br>R: CCAAGGGAAAAATGGAAAA   | 164-182  | 1.5 | 58 | Gustafson-<br>Seabury et al.<br>2005 | AB103778 |
| microsatellite           | TKY567  | 22                          | F: AGCCCTATCTTTACCTTCTC<br>R: GAGGCGCTATTAAGTATTC   | 138      | 2.0 | 58 |                                      | AB103785 |
| microsatellite           | TKY572  | 22                          | F: GTGTAGCGCATGATCCAGTG<br>R: CCCCAGCCTGACCTTCAT    | 100-110  | 2.0 | 58 | Tozaki et al.<br>2004                | AB103790 |
| microsatellite           | TKY582  | 22                          | F: AGGCAGCTTGACTACCCTGA<br>R: AAAGTCTCCCCTGCGTGTT   | 147-159  | 1.5 | 58 | Tozaki et al.<br>2004                | AB103800 |
| microsatellite           | TKY593  | 22                          | F: TGGATGAGAGAAGGCAAAAC<br>R: CTGTATGAACCGTCTCCAAG  | 172      | 2.0 | 58 |                                      | AB103811 |
| microsatellite           | TKY596  | 22                          | F: AGGGATGTCCTCCCTAAGA<br>R: TCACCACTTCCAGGGAGTCT   | 122-136  | 1.5 | 58 | Tozaki et al.<br>2004                | AB103814 |
| microsatellite           | TKY695  | 22                          | F: TGCCATGCAAAGAAGTGAGA<br>R: TCCTTCCCCACTCTGCTTTA  | 165-187  | 1.5 | 50 | Tozaki et al.<br>2004                | AB103913 |
| microsatellite           | TKY785  | 22                          | F: TTAGGTGTCAAGTCTAGGAC<br>R: GTGGGGAAGACGCTAAAGAG  | 192      | 2.0 | 58 | Tozaki et al.<br>2004                | AB104003 |
| microsatellite           | TKY1009 | 22                          | F: ACAATGTCTGCAACTCACTC<br>R: GCACTTTGCCACATTTGTTTC | 119      | 2.0 | 58 |                                      | AB104227 |

|                                                    |         |                   |                                                         |         |     |    |                                      |          |
|----------------------------------------------------|---------|-------------------|---------------------------------------------------------|---------|-----|----|--------------------------------------|----------|
| microsatellite                                     | TKY1093 | 22                | F: ACATCAGTGATGTTTCACAGC<br>R: GGGCATGCAGCTTCTTTAG      | 332     | 2.0 | 58 |                                      | AB104311 |
| microsatellite                                     | TKY1106 | 22                | F: TGCCACAACCTAGAAGGATTC<br>R: GCAGAACGTGCGAACTTAAC     | 278     | 2.0 | 58 |                                      | AB104324 |
| microsatellite                                     | TKY1158 | 22                | F: AGCTCCACTTGTCAAACATG<br>R: AGAGCCCTCACTCAATAAC       | 192     | 2.0 | 58 |                                      | AB104376 |
| microsatellite                                     | TKY1160 | 22                | F: AATATCCCCTTAATGGCCGAC<br>R: ATTGGGAGAATCTGGAACAG     | 211     | 2.0 | 58 |                                      | AB104378 |
| microsatellite                                     | TKY1315 | 22                | F: CATTGTCCAACCTAGACCATG<br>R: GGAGCCTAGAAAAAGTACAG     | 206     | 1.5 | 58 | Tozaki et al.<br>2007                | AB215258 |
| microsatellite                                     | TKY2105 | 22                | F: GCACTCTTGGTACAAATCTT<br>R: ACCCTCATGAGAGGAATTTG      | 245     | 1.5 | 58 | Tozaki et al.<br>2007                | AB216048 |
| microsatellite                                     | TKY2468 | 22                | F: CGGCAGACACAACGACAG<br>R: AGAAGCACCCACTCTCCTCA        | 148     | 1.5 | 58 | Tozaki et al.<br>2007                | AB216411 |
| microsatellite                                     | TKY2844 | 22                | F: TTTCTTGTTGAACGCAAACA<br>R: GACATGACGGCTGTCTCTTT      | 174     | 1.5 | 58 | Tozaki et al.<br>2007                | AB216787 |
| transmembrane 9<br>superfamily protein<br>member 4 | TM9SF4  | 22                | F: CTCCCACCACAAGACAAAGC<br>R: GGACAACGGCATATTTATTTACAAC | 423     | 1.5 | 62 |                                      | CX600477 |
| topoisomerase<br>(DNA) I                           | TOP1    | 22                | F: TCCCATTCACTCTTCTCCCC<br>R: ATCCAGCCAAGAAAAGGCTC      | 113     | 1.5 | 58 | Gustafson-<br>Seabury et al.<br>2005 |          |
| microsatellite                                     | UMNe077 | 22q15-<br>q16prox | F: CAATGGGGACTTCTCAGATAGC<br>R: AGGGAGGTTGAAGAGTTTACC   | 135-143 | 2.0 | 58 | Roberts et al.<br>2000               | AF91707  |
| microsatellite                                     | UMNe105 | 22q15-<br>q16prox | F: TGTGTGGCCAGTTTATAACCATAC<br>R: AAACAAGCCAATCCCAAAAG  | 210     | 1.5 | 60 | Mickelson et al.<br>2003             | AF536249 |
| microsatellite                                     | UMNe137 | 22                | F: CTGCTTTTTACTGCTTCAGTGC<br>R: GATTTGAGTCGAGGTCTGCC    | 137     | 1.5 | 58 | Wagner et al.<br>2004a               | AY391299 |
| microsatellite                                     | UMNe183 | 22                | F: AGAGAACAGGAGAAGACATGCC<br>R: ACCCTGTCTCATGGAAGCTG    | 106     | 2.0 | 58 | Wagner et al.<br>2004a               | AY391316 |
| microsatellite                                     | UMNe208 | 22                | F: AGAGCAGAACGCAACTTTCC<br>R: AGGAGATGCGCATATGTGC       | 140     | 2.0 | 58 | Mickelson et al.<br>2003             | AF536290 |
| microsatellite                                     | UMNe215 | 22                | F: AACTGCAGCCTGGTGAGC<br>R: GACCTCCTCCTTTCTCTTCTG       | 197     | 2.0 | 58 | Mickelson et al.<br>2003             | AF536296 |
| microsatellite                                     | UMNe355 | 22                | F: TCATGCAATTCTGAAAAAGAGC<br>R: CAGAGCAAATCTTCCTCACC    | 182     | 2.0 | 58 | Wagner et al.<br>2004a               | AY391346 |

|                                                                                                                                                                 |                                           |    |                                                        |       |     |    |                                      |          |
|-----------------------------------------------------------------------------------------------------------------------------------------------------------------|-------------------------------------------|----|--------------------------------------------------------|-------|-----|----|--------------------------------------|----------|
| microsatellite                                                                                                                                                  | UMNe358                                   | 22 | F: TACTGCTAAACAAAGAGTGCGC<br>R: TCATGCGTTTCTTTTGTGTTAG | 138   | 2.0 | 55 | Wagner et al.<br>2004a               | AY735243 |
| microsatellite                                                                                                                                                  | UMNe441                                   | 22 | F: GATAAACTGTCCTCCTGCTGAG<br>R: GGCAGAAAGTTCTGTGGAGTG  | 150   | 1.5 | 62 | Mickelson et al.<br>2004             | AY731395 |
| microsatellite                                                                                                                                                  | UMNe466                                   | 22 | F: CAGGCCCTGCTAACTCTC<br>R: TAAGGAAGACACTGCCTGCC       | 371   | 1.5 | 62 | Wagner et al.<br>2004b               | AY464493 |
| microsatellite                                                                                                                                                  | UMNe490                                   | 22 | F: TTGAAAAGGACACGTGCAAG<br>R: TAGGCCACCTTCCAAAATTG     | ~300  | 1.5 | 55 | Wagner et al.<br>2004b               | AY464503 |
| microsatellite                                                                                                                                                  | UMNe499                                   | 22 | F: CTGCAGCCCGTGTGTATG<br>R: TTAAAAGGGACTTGAGAGGGC      | ~100  | 1.5 | 60 | Wagner et al.<br>2004b               | AY464507 |
| microsatellite                                                                                                                                                  | UMNe537                                   | 22 | F: TGCATTACGGGAAAGGAATC<br>R: CTGAACTGCACACTGAGAAATG   | 129   | 1.5 | 58 | Mickelson et al.<br>2004             | AY731409 |
| microsatellite                                                                                                                                                  | UMNe607                                   | 22 | F: AAGACCATCTTTGCAGTGTGG<br>R: TTCCTTTGCCCTTGGGATATG   | 220   | 1.5 | 58 | Wagner et al.<br>2004a               | AY735295 |
| 5'-3'<br>exoribonuclease 2                                                                                                                                      | XRN2                                      | 22 | F: GACCCTCTGTTCTCACCCCTTA<br>R: GAAGTGGAGGCATAGCAAAAG  | 158   | 2.0 | 58 | Gustafson-<br>Seabury et al.<br>2005 |          |
| tyrosine 3-<br>monooxygenase/try<br>ptophan 5-<br>monooxygenase<br>activation protein,<br>beta polypeptide<br>zinc finger, CCCH-<br>type with G patch<br>domain | YWHAB<br><br>ZGPAT<br>( <i>KIAA1847</i> ) | 22 | F: CCCAATGCTACACAACCAG<br>R: CCGAGAAATTGAGTGCCAG       | ~1000 | 1.5 | 62 | Gustafson-<br>Seabury et al.<br>2005 | BI961675 |
| zinc fingers and<br>homeoboxes 3                                                                                                                                | ZHX3                                      | 22 | F: ATCTGGTTCACAGCCCAAAG<br>R: TGACCACCTTCACAGCAGAC     | 416   | 1.5 | 63 | Gustafson-<br>Seabury et al.<br>2005 | BI961508 |
| zinc finger, NFX1-<br>type containing 1                                                                                                                         | ZNFX1<br>( <i>KIAA1404</i> )              | 22 | F: GGGCGTAAATCATACTCTGG<br>R: GATCTCCTCAAAGTTCATCAGG   | 373   | 1.5 | 60 |                                      | CD464197 |
|                                                                                                                                                                 |                                           |    |                                                        | 112   | 1.5 | 55 | Gustafson-<br>Seabury et al.<br>2005 |          |

| Name                                       | Symbol          | Horse chr.   | Primers                                                 | Product size (bp) | MgCl <sub>2</sub> (mM) | T <sub>a</sub> | Reference                            | Accession No |
|--------------------------------------------|-----------------|--------------|---------------------------------------------------------|-------------------|------------------------|----------------|--------------------------------------|--------------|
| ATP/GTP binding protein 1                  | AGTPBP1         | 23           | F: TTAGAAAGTAAGTCATTTAA<br>R: AAATCTATAAGCAACACCTGGT    | ~275              | 1.7                    | 58             |                                      |              |
| microsatellite                             | AHT039          | 23q12        | F: CCATTTTCTCATCACAAGCG<br>R: TGAATCCCTGCTGCTTCC        | 79-102            | 2.0                    | 58             | Swinburne et al. 2000*               | AJ271524     |
| microsatellite                             | AHT072          | 23           | F: TCTGCCCCCTCTTCATGTATACC<br>R: TCATGAATGAAATGCTAGGTGG | 229-240           | 1.5                    | 58             | Swinburne et al. 2003                | AJ507689     |
| microsatellite                             | AHT114          | 23           | F: TGCAGCCCTCTTAAGCCC<br>R: AGTGGAAAATGACCGATGCA        | 243               | 1.25                   | 61             |                                      |              |
| microsatellite                             | AHT117          | 23           | F: AGAGACAGGAGAATGTTGAAGG<br>R: AACATTTGACCTCACTTGGTG   | 190               | 2.0                    | 61             |                                      |              |
| aldehyde dehydrogenase 1 family, member A1 | ALDH1A1         | 23           | F: GGGCCATTAAGAGAAAGA<br>R: TATATGACCCCCAAGTCC          | 161               | 3.0                    | 58             | Chowdhary et al. 2003                |              |
| aquaporin 7                                | AQP7            | 23q17-q18    | F: TAGGTGGCATCATCTACTTGG<br>R: GGATTGAAGGTCTGCTGGT      | 183               | 1.5                    | 58             | Perrocheau et al. 2006*              |              |
| microsatellite                             | ASB39           | 23q15        | F: ACAGCTGCCTGGATATGTGG<br>R: GCAGAGAGAAATAGAGATGC      | 156-172           | 2.0                    | 58             | Irvin et al. 1998; Lear et al. 1999* | AF004769     |
| BAC end sequence                           | CH241-2L11_SP6  | 23           | F: GCCACTCCATGCTGACTGTA<br>R: CTGCAGGTCTGGATCACTCA      | 244               | 1.5                    | 58             |                                      | CT864967     |
| BAC end sequence                           | CH241-32E21_T7  | 23           | F: GACCTGCTCCATTACCCCTA<br>R: TAGTGCACCCAAGAGCAGTG      | 152               | 1.5                    | 58             |                                      | CT957034     |
| BAC end sequence                           | CH241-34H11_T7  | 23           | F: AGTTCGTGGCAGCAGAAAAT<br>R: ACTTTCCTGCTGGGAGCAT       | 208               | 1.5                    | 58             |                                      | CT958587     |
| BAC end sequence                           | CH241-42I2_SP6  | 23           | F: TGCTGGCTGCCTTAGGAATA<br>R: TGGACTGTTGGTCTGAGCTG      | 176               | 1.5                    | 58             |                                      | CT964212     |
| BAC end sequence                           | CH241-80K19_T7  | <b>23q18</b> | F: TGCATAAAGGATGTGCGGTA<br>R: CTGGTGGTGGTGATGCTATG      | 153               | 1.5                    | 58             |                                      | CU011085     |
| BAC end sequence                           | CH241-92F11_SP6 | 23           | F: GAGGCAATGGAAACACTGCT<br>R: TGGGCCAATTCTATCACTCC      | 201               | 1.5                    | 58             |                                      | CU013797     |
| BAC end                                    | CH241-115F18_T7 | 23           | F: TTCACCCCTCATTC AACCTC                                | 103               | 1.5                    | 58             |                                      | CT007279     |



|                   |            |              |                             |         |     |    |                            |                       |
|-------------------|------------|--------------|-----------------------------|---------|-----|----|----------------------------|-----------------------|
| sequence          |            |              | R: CGTCTTCTGATGGGTTGAGC     |         |     |    |                            |                       |
| ciliary           | CNTFR      | <b>23q19</b> | F: CCCAACACCTTCAATGTGACT    | 346     | 1.5 | 58 |                            |                       |
| neurotrophic      |            |              | R: TGATAGCTGTGGCATTGTGG     |         |     |    |                            |                       |
| factor receptor   |            |              |                             |         |     |    |                            |                       |
| microsatellite    | COR060/055 | 23           | F: TCCTTCCTTCTCTGGGTCTT     | 200-226 | 2.0 | 58 | Ruth et al.<br>1999        | AF108377/<br>AF108372 |
|                   |            |              | R: AGCAGTATGTTCCAAGCGT      |         |     |    |                            |                       |
| cathepsin L1      | CTSL1      | 23           | F: ACTCTTTCTGGCTGCCCTTT     | 300     | 1.5 | 60 |                            |                       |
|                   |            |              | R: TGCTTCCCTTGGCTGTATTC     |         |     |    |                            |                       |
| death-associated  | DAPK1      | 23q13        | F: ATGGTGTTGGTCAGTGAGGTC    | 210     | 1.5 | 55 | Perrocheau<br>et al. 2006* | DX010461              |
| protein kinase 1  |            |              | R: GACGGAGAAGATCAAGTGCTG    |         |     |    |                            |                       |
| dedicator of      | DOCK8      | 23           | F: AGTTGGAAAAGGACTTGTTGGT   | 161     | 1.5 | 58 |                            | CX595911              |
| cytokinesis 8     |            |              | R: TGCCCAGTATAGCCAAAATCT    |         |     |    |                            |                       |
| fructose-1,6-     | FBP1       | 23q12-q13    | F: GTGAAGAAGCTGGATGTCCTC    | 108     | 1.5 | 58 | Mariat et al.<br>2001*     | CX594820              |
| bisphosphatase 1  |            |              | R: CACTATTATGGCGTGTGTGTCTT  |         |     |    |                            |                       |
| growth arrest and | GADD45G    | 23           | F: GAGCCGAGGACTCTACAAGTG    | 212     | 1.5 | 58 |                            | DN511281              |
| DNA-damage-       |            |              | R: CAGTGCAGACCGCTCAGT       |         |     |    |                            |                       |
| inducible, gamma  |            |              |                             |         |     |    |                            |                       |
| growth arrest-    | GAS1       | 23           | F: CCAGTGGTGTTGAACAATGC     | 626     | 1.5 | 60 |                            |                       |
| specific 1        |            |              | R: GGATGGAGCACATGTACAG      |         |     |    |                            |                       |
| microsatellite    | HP13       | 23           | F: CCTAAGCACTGCCTTCAGCATC   | 134-138 | 1.5 | 58 | Swinburne<br>et al. 2005   |                       |
|                   |            |              | R: GATCATCACTCCATATCCACTCCC |         |     |    |                            |                       |
| microsatellite    | LEX053     | 23           | F: TTGTGGAGCTGTGTCTGCAT     | 202     | 2.0 | 58 | Chowdhary<br>et al. 2003   | AF075655              |
|                   |            |              | R: TTCAAATCCTAGCTCGTCCAA    |         |     |    |                            |                       |
| microsatellite    | LEX063     | 23           | F: CGGGGTGTGCATCTCTTAGG     | 241-249 | 2.0 | 58 | Coogle &<br>Bailey 1997    | AF075663              |
|                   |            |              | R: TGGCGAATGCTGAATCTGG      |         |     |    |                            |                       |
| leucine rich      | LINGO2     | 23           | F: CTCATGGGTGAATCATGTGC     | 189     | 1.5 | 58 |                            | CT941726              |
| repeat and Ig     |            |              | R: CCTTCACCAGCAGAAAGAGTG    |         |     |    |                            |                       |
| domain            |            |              |                             |         |     |    |                            |                       |
| containing 2      |            |              |                             |         |     |    |                            |                       |
| LOC158345         | LOC158345  | 23           | F: AGCCAGAGTTGCCCTTGTA      | 199     | 1.5 | 58 |                            | CT950695              |
|                   |            |              | R: AAGCCCATCATTCATTTTGC     |         |     |    |                            |                       |
| NADH              | NDUFB6     | 23           | F: GGTACACGCCAGACGAGA       | 129     | 1.5 | 58 |                            | CX594959              |

|                                                                                   |                                             |           |                                                                     |         |     |      |                            |          |
|-----------------------------------------------------------------------------------|---------------------------------------------|-----------|---------------------------------------------------------------------|---------|-----|------|----------------------------|----------|
| dehydrogenase<br>(ubiquinone) 1<br>beta subcomplex,<br>6, 17kDa<br>microsatellite | NVHEQ026                                    | 23        | R: ATTCCTCCATAGGCCACATC                                             |         |     |      |                            |          |
| opioid receptor,<br>sigma 1                                                       | OPRS1<br>( <i>SIGMAR1</i> , <i>SR-BP1</i> ) | 23        | F: GGAAGTGGAACCAACTATGACA<br>R: TGGAGGTTTAAAGGGACGCTAT              | 140     | 1.5 | 58   | Roed et al.<br>1998        | AF056392 |
| phospholipase<br>A2-activating<br>protein                                         | PLAA                                        | 23        | F: CGTCCTCACCATATGCCTTAC<br>R: TCTAGGCCAGGGCTGGTCTCC                | 253     | 1.5 | 65   | Lear et al.<br>2001        | G62162   |
| patched homolog<br>1 ( <i>Drosophila</i> )                                        | PTCH1                                       | 23        | F: CTGGCTACATTGACCCTGAAC<br>R: TGGTTCTGACACTGAGGCATA                | 240     | 1.5 | 58   |                            | DN509052 |
| protein tyrosine<br>phosphatase,<br>receptor type, D                              | PTPRD                                       | 23        | F: TGGTGATCTTTCCTTTTCTTGG<br>R: GTATTTGAACTGGGCAGCAAT               | 137     | 1.5 | 58   |                            | CX605711 |
| RAN binding<br>protein 6                                                          | RANBP6                                      | 23        | F: GGTAGGGGCAGAAACACAAA<br>R: GGAGAACTTTCTGGGCAATG                  | 168     | 1.5 | 58   |                            | CU017459 |
| microsatellite                                                                    | SGCV04                                      | 23q19     | F: TGGAATGTGCAAGAACTCGT<br>R: GCACCCATCTCCATTACTT                   | 161     | 1.5 | 58   |                            |          |
| small nuclear<br>RNA activating<br>complex,<br>polypeptide 3,<br>50kDa            | SNAPC3                                      | 23        | F: CGACGCCTCCTCCTAAAC<br>R: CAGCTGTGTGCCTTTGATTAT                   | 213     | 3.0 | 58   | Godard et al.<br>1997*     | U90587   |
| spindlin 1                                                                        | SPIN1<br>( <i>SPIN</i> )                    | 23q18-q19 | F: ACAATGACAGTTTTGCACCTG<br>R: AGTCACCATCCAAGCGTAGTT                | 181     | 1.5 | 58   |                            | DN504823 |
| serine<br>palmitoyltransfera<br>se, long chain<br>base subunit 1                  | SPTLC1                                      | 23        | F: TGTGGACCCATCAGAAGACTGTTT<br>R:<br>ATGGAACACGAAGACCTCTGAACTA<br>G | 240     | 4.0 | TD60 | Chowdhary<br>et al. 2003*  |          |
| tight junction<br>protein 2 ( <i>zona</i><br><i>occludens</i> 2)                  | TJP2                                        | 23q15prox | F: CCAGAGAAAGATGCTGGCTA<br>R: CGTGAAGGGAGAGAAGATCA                  | 214     | 1.5 | 58   |                            | CX599930 |
| microsatellite                                                                    | TKY269                                      | 23        | F: ATAGCTGCCTTCCAGGACTGT<br>R: GGCTTTGCATAAAGCTTCAAA                | 169     | 1.5 | 55   | Perrocheau<br>et al. 2006* | DX010597 |
|                                                                                   |                                             |           | F: ATTTGGGATGTCCTGAACAA                                             | 120-126 | 1.5 | 50   | Kakoi et al.               | AB048311 |

|                |         |    |                                                       |         |     |    |                        |          |
|----------------|---------|----|-------------------------------------------------------|---------|-----|----|------------------------|----------|
| microsatellite | TKY301  | 23 | R: TGCATTTCAGAGACTTTGTCA<br>F: AATGGTGGCTAATCAATGGG   | 197-213 | 1.5 | 58 | 2000<br>Tozaki et al.  | AB034610 |
| microsatellite | TKY339  | 23 | R: GTGTATGATGCCCTCATCTC<br>F: GATCAAGCGTTAAGAAAGTTG   | 140-158 | 1.5 | 58 | 2000c<br>Tozaki et al. | AB044840 |
| microsatellite | TKY346  | 23 | R: TGGAATCCATGACCAAATC<br>F: CACAGCTCAGGTCCTACTTC     | 178-184 | 1.5 | 58 | 2001<br>Tozaki et al.  | AB044847 |
| microsatellite | TKY367  | 23 | R: GTTCAGCAGAATTCAGTGAG<br>F: GTTTTTGTCCATTGCTCTGG    | 236-242 | 1.5 | 58 | 2001<br>Tozaki et al.  | AB044867 |
| microsatellite | TKY385  | 23 | R: AATTATGTTGGCCAGACTGG<br>F: TAGTACGTACAACAGCTCTG    | 143-155 | 1.5 | 58 | 2001<br>Tozaki et al.  | AB048291 |
| microsatellite | TKY441  | 23 | R: CACTTGCATCTTCCTAAAGC<br>F: TGTCCTCCAGGAGAGGGAAG    | 190-210 | 1.5 | 55 | 2001<br>Tozaki et al.  | AB103659 |
| microsatellite | TKY486  | 23 | R: TTTTGAACGCTGATTGCAG<br>F: CAGCTTTTGTGGGAAGAGG      | 140-166 | 1.5 | 55 | 2004<br>Tozaki et al.  | AB103704 |
| microsatellite | TKY536  | 23 | R: AACTCATCAGTCCATTGGCTTT<br>F: GCAGTGTCAATGTACTTTCG  | 145     | 2.0 | 58 | 2004                   | AB103754 |
| microsatellite | TKY542  | 23 | R: GTGTGGGACAGCAATAG<br>F: GGTGCCTAACCCAGATATGC       | 162-174 | 1.5 | 58 | Tozaki et al.          | AB103760 |
| microsatellite | TKY568  | 23 | R: CCCCATCAATTTCTGCTTTT<br>F: TTCCTGACGTGAAGGCATTA    | 217-257 | 1.5 | 50 | 2004<br>Tozaki et al.  | AB103786 |
| microsatellite | TKY881  | 23 | R: TGCCCTTCCTGCCTAGTAGA<br>F: GTGGTAGATGAAGAGACGTG    | 206     | 2.0 | 58 | 2004<br>Tozaki et al.  | AB104099 |
| microsatellite | TKY947  | 23 | R: TACCTCCCCACTCCCCAA<br>F: AAACCTCCCCTATCCAGTC       | 285     | 2.0 | 58 |                        | AB104165 |
| microsatellite | TKY1122 | 23 | R: GTTAAAAAACAATTTAAACTGTG<br>F: GTTAGTGAAGCTTAAGCTGC | 288     | 2.0 | 58 |                        | AB104340 |
| microsatellite | TKY2261 | 23 | R: ACGAGGGCGTTACCAATAG<br>F: GGTAACATACCCCTTAGTTG     | 120     | 1.5 | 58 | Tozaki et al.          | AB216204 |
| microsatellite | TKY2321 | 23 | R: TCATGTTCAGCCTCTGAGTG<br>F: GAAGTAACTAGGGAGTCAC     | 259     | 1.5 | 58 | 2007<br>Tozaki et al.  | AB216264 |
| microsatellite | TKY2336 | 23 | R: ATCACACTACTAGTGAGGG<br>F: AAGTCTGTCATGAAATGGGA     | 152     | 1.5 | 58 | 2007<br>Tozaki et al.  | AB216279 |
| microsatellite | TKY2433 | 23 | R: GATCTTTTAGGGAAACAAAGC<br>F: TGGGAGGAAAACATGAAAAA   | 286     | 1.5 | 58 | 2007<br>Tozaki et al.  | AB216376 |
|                |         |    | R: AATAACCAAGCCTGATGCAA                               |         |     |    | 2007                   |          |

|                                                                  |         |           |                                                                    |         |     |    |                       |                       |
|------------------------------------------------------------------|---------|-----------|--------------------------------------------------------------------|---------|-----|----|-----------------------|-----------------------|
| microsatellite                                                   | TKY2485 | 23        | F: GTTTTTGCTGGCACCTTTTA<br>R: GGTGGGAAAAGATGGAGAGT                 | 161     | 1.5 | 58 | Tozaki et al. 2007    | AB216428              |
| transducin-like enhancer of split 4 (E(sp1) homolog, Drosophila) | TLE4    | 23        | F: CTGCTGGAAGATGCGATG<br>R: ATGACAGCGATGGTGAGAAG                   | ~700    | 3.0 | 58 | Chowdhary et al. 2003 |                       |
| transmembrane channel-like 1                                     | TMC1    | 23        | F: AATTTGGGGATCCACATTCA<br>R: ACAGCAGTAAGCGCCTCAGT                 | 240     | 1.5 | 58 |                       | CT951751              |
| tyrosinase-related protein 1                                     | TYRP1   | 23q14-q16 | F: GCGCCAACTCCACAGTATTT<br>R: TATGCTGATGACCAAAGGGG                 | 332     | 2.0 | 58 | Rieder et al. 2000    | AF395448/<br>AF395447 |
| microsatellite                                                   | UM018   | 23        | F: AGATAGGGAAAGAACGAAG<br>R: GGTTAGTGTCGGATTAGG                    | ~200    | 2.0 | 58 |                       | AF195135              |
| microsatellite                                                   | UM019   | 23        | F: TACTGCCAGCACTTGTACC<br>R: TCTCTCAGTTTCTCTCTCTGTC                | 134-180 | 2.0 | 58 | Meyer et al. 1997     | AF195136              |
| microsatellite                                                   | UM022   | 23        | F: AAATAGCCACCAGCACGCAC<br>R: GCAGCAAATCATCAACCCAG                 | 125-140 | 3.0 | 58 | Meyer et al. 1997     | AF195138              |
| microsatellite                                                   | UM027   | 23        | F: TGCAAGAATTGTGAGGGAC<br>R: GTGCTCAGTTAGTGGTATTC                  | 235-239 | 1.5 | 56 | George et al. 1998    | AF195574              |
| microsatellite                                                   | UMNe51  | 23        | F: TCTCTGCTCCAGATGGCC<br>R: AACTTTCTCATCCCCAACCC                   | 158-160 | 2.0 | 58 | Roberts et al. 2000   | AF191689              |
| microsatellite                                                   | UMNe069 | 23        | F: CCTCTTAAGGATGCTCACAGTG<br>R: TGCATGGGTGTATGGGTATG               | 122-130 | 2.0 | 58 | Roberts et al. 2000   | AF191702              |
| microsatellite                                                   | UMNe142 | 23        | F: ATGGAGTGGAATGATTGGAG<br>R: CAGTGAATGGCACATTTTAC                 | 150     | 1.5 | 58 | Mickelson et al. 2003 | AF536260              |
| microsatellite                                                   | UMNe159 | 23        | F: TTGCAATCCTTTCCCCTTC<br>R: GATCATTCACTTGTGTGGAAAG                | 141     | 1.5 | 58 | Mickelson et al. 2003 | AF536269              |
| microsatellite                                                   | UMNe357 | 23        | F:<br>GATCCAGTAACAAACAAGCTAATTT<br>R:<br>TCAAATGATTTCTTACTGAGGATTC | 210     | 2.0 | 58 | Wagner et al. 2004a   | AY391347              |
| microsatellite                                                   | UMNe473 | 23        | F: GATCCAAACCGGCAAAAAC<br>R: TCTGCTCCCCACCAAGTTC                   | ~270    | 1.5 | 58 | Wagner et al. 2004b   | AY464497              |
| microsatellite                                                   | UMNe524 | 23        | F: TATGGTGGCAAATTCTGCTC<br>R: CTTAAGCATTATAGCAGCAACC               | ~100    | 1.5 | 55 | Wagner et al. 2004b   | AY464517              |

|                                             |         |          |                                                      |      |     |    |                                 |          |
|---------------------------------------------|---------|----------|------------------------------------------------------|------|-----|----|---------------------------------|----------|
| microsatellite                              | UMNe560 | 23       | F: CTCATCAGCCACGCTGTG<br>R: GGGGACACAATTCAATCCAC     | ~175 | 1.5 | 58 | UMNe560                         | AY464527 |
| microsatellite                              | VHL121  | 23       | F: AATGCACATGCCATAGTGCTC<br>R: GCTTCCCAGACTCTCATTTGG | 122  | 1.5 | 58 | van<br>Haeringen at<br>al. 1998 |          |
| very low density<br>lipoprotein<br>receptor | VLDLR   | 23q15dis | F: ATGGCCTAACGGGATTACAC<br>R: TTAGTGCGAGAGGATGAGCTA  | 767  | 1.5 | 62 | Milenkovic<br>et al. 2002       |          |

| Name                                                           | Symbol           | Horse chr.   | Primers                                                      | Product size (bp) | MgCl <sub>2</sub> (mM) | T <sub>a</sub> | Reference                                 | Accession No |
|----------------------------------------------------------------|------------------|--------------|--------------------------------------------------------------|-------------------|------------------------|----------------|-------------------------------------------|--------------|
| sequence tagged site                                           | 24STS01          | 24           | F: TACCTCCGAAACCCTGTGTA<br>R: GAGCCCTTTGTAGAAGACCTG          | 272               | 1.5                    | 58             |                                           | CX604630     |
| sequence tagged site                                           | 24STS02          | 24           | F: GGACTCATGAACTCCTTCACG<br>R: CCTCAAGAAGATCCTCATCG          | 102               | 1.5                    | 58             |                                           |              |
| activator of heat shock 90kDa protein ATPase homolog 1 (yeast) | AHSA1            | 24           | F: CAAGTGTGAGGTGACAGAGGT<br>R: CCAGTTTAGTTTGATGCTCCA         | 106               | 1.5                    | 58             |                                           | CX595858     |
| microsatellite                                                 | AHT004<br>(HMB4) | 24q14        | F: AACCGCCTGAGCAAGGAAGT<br>R: CCCAGAGAGTTTACCCT              | 190               | 2.0                    | 58             | Binns et al. 1995;<br>Godard et al. 1998* | Y07733       |
| microsatellite                                                 | AHT032           | 24q14-q15    | F: CCAAGTCCTGCTTCCATGAT<br>R: CCTGTCTGGGTCAGAGGATG           | 138-142           | 2.0                    | 58             | Swinburne et al. 2000                     | AJ271517     |
| microsatellite                                                 | AHT071           | 24           | F: GCAATTGAAACAGAGGAAAACA<br>R: GGACAGAACTTACCGAACCC         | 243-249           | 1.5                    | 58             | Swinburne et al. 2003                     | AJ507688     |
| microsatellite                                                 | AHT119           | <b>24q14</b> | F: GACAACCACCCGAGGTTG<br>R: ATGACCCATAGTAGGAAACCCA           | 264               | 1.5                    | 61             |                                           |              |
| bradykinin receptor B2                                         | BDKRB2           | <b>24q16</b> | F: ACTTCCTCATGCTGGTGAGC<br>R: TCTGCATCTCGTTGTTACGC           | 336               | 1.5                    | 58             |                                           |              |
| calmodulin 1                                                   | CALM1            | 24           | F: TTGAGCACAGTCAGGCATTTTGT<br>R: CCTGAGGTAAACCAATTTTAAATGTGT | 149               | 2.0                    | 58             | Chowdhary et al. 2003                     |              |
| CDC42 binding protein kinase beta                              | CDC42BPB         | 24           | F: TCGTAGTCAGAAGCTGGACAT<br>R: TTCAAAGGAGAGATTCGTGTC         | 127               | 1.5                    | 58             |                                           | CX595283     |
| microsatellite                                                 | COR024           | 24           | F: CAAAAGTGATTGCCTTCGAT<br>R: TTGGAAGCTGGGTGATTG             | 201-213           | 2.0                    | 58             | Murphie et al. 1999                       | AF101393     |
| microsatellite                                                 | COR025           | 24           | F: ACAGAGCTGACTGCCTATGG<br>R: TCCTCTTCTCAGGGAGACCT           | 172-176           | 2.0                    | 58             | Murphie et al. 1999                       | AF101394     |
| microsatellite                                                 | COR061           | 24           | F: TTAAGAGTGGCAGACCGACT<br>R: GAACGCTTCTTAAGTGGCAGA          | 188-210           | 2.0                    | 58             | Tallmadge et al. 1999a                    | AF142598     |
| microsatellite                                                 | COR087           | 24           | F: CCTAATCATCAATGGCTAACTG<br>R: CAATCTGTCCATAACTGGCAC        | 181               | 2.0                    | 58             | Tallmadge et al. 1999b                    | AF154940     |

|                                                                    |                        |                 |                                                              |         |     |    |                                             |          |
|--------------------------------------------------------------------|------------------------|-----------------|--------------------------------------------------------------|---------|-----|----|---------------------------------------------|----------|
| deiodinase,<br>iodothyronine, type<br>III                          | DIO3                   | 24q16.3         | F: TGCTAGACTTCCTGTGCATCC<br>R: GCCTGCTTGAAGAAATCCAAC         | 205     | 1.5 | 55 | Perrocheau<br>et al. 2005*                  | AY817462 |
| microsatellite                                                     | EA2C4                  | 24              | F: CAAAGCTGTGCTCTGGGTTT<br>R: AGCAGGAGGAATGGCAGTTA           | 253     | 3.0 | 58 | Gralak et al.<br>1994                       | Z29341   |
| fibronectin leucine<br>rich transmembrane<br>protein 2             | FLRT2                  | 24q15-<br>q16.1 | F: GGGGCATTTGTAAAGGGATT<br>R:<br>GCCTTTACTGAATATATCAACAAGGTA | 304     | 3.0 | 58 | Chowdhary<br>et al. 2003*                   |          |
| hypoxia-inducible<br>factor 1, alpha<br>subunit                    | HIF1A                  | 24              | F: CCTAAATGTCCTGCCCACCCT<br>R: TCCAACCACAAAGAGCAAAAGG        | 290     | 2.0 | 58 | Chowdhary<br>et al. 2003                    | G62202   |
| microsatellite                                                     | LEX032                 | 24              | F: CGTAGTAGGGTTTTGGGTCC<br>R: TTGCGTTTCAATTTTAAATGAC         | 254-267 | 3.0 | 58 | Coogle et al.<br>1996                       | AF075634 |
| microsatellite                                                     | LEX042                 | <b>24q15</b>    | F: ACATACAAACCTGCTCAACAT<br>R: CCTACACATCGCTCATCAA           | 217-227 | 3.0 | 58 | Coogle et al.<br>1997                       | AF075644 |
| microsatellite                                                     | LEX074                 | 24              | F: AAGAGTGCTCCCGTGTG<br>R: GACAATGCAGAACTGGGTAA              | 148-168 | 2.0 | 58 | Bailey et al.<br>2000                       | AF212260 |
| mediator of RNA<br>polymerase II<br>transcription,<br>subunit 6    | MED6                   | 24              | F: GCCAGAACTGTGAAATCTGA<br>R: AATGAGGCATAACGATTGACA          | 156     | 1.5 | 58 |                                             | DN507485 |
| numb homolog<br>(Drosophila)                                       | NUMB                   | <b>24q15</b>    | F: GATCCCGTCTGCAACTT<br>R: GGTGGCCTGTCTTAGAGA                | 365     | 3.0 | 58 | Chowdhary<br>et al. 2003                    |          |
| phosphatidylinosito<br>l glycan anchor<br>biosynthesis, class<br>H | PIGH                   | 24              | F: GCCTACCTTACCAACTGAGGA<br>R: AGTTTCCCATTGTCTTGTTC          | 136     | 1.5 | 58 |                                             |          |
| sel-1 suppressor of<br>lin-12-like (C.<br>elegans)                 | SEL1L                  | 24              | F: TCGAGATGTCTTCACCCAAC<br>R: CTGCCCTGCTGTAAGCTAT            | 118     | 1.5 | 60 |                                             |          |
| serpin peptidase<br>inhibitor, clade A,<br>member 1                | SERPINA1<br>(PI, AAT7) | 24q15-<br>q16   | F: CAACACTCACACTGAGATCCTG<br>R: TCAGCATCCCTGAAGTTGATGG       | 200     | 2.0 | 58 | Godard et al.<br>1998; Lear<br>et al. 1999* | AF034077 |
| sine oculis<br>homeobox<br>homolog 6                               | SIX6                   | <b>24q14</b>    | F: CTCTTCCTCGGCCCTTAG<br>R: CCTTACCCGCTTTAACCCT              | 184     | 2.0 | 55 |                                             |          |

(Drosophila)

|                                                |        |              |                                                         |         |     |    |                     |          |
|------------------------------------------------|--------|--------------|---------------------------------------------------------|---------|-----|----|---------------------|----------|
| solute carrier family 8, member 3              | SLC8A3 | 24           | F: TCAGGGGACGTGCCAAGCA<br>R: ATATAGAGCCAGATGTAGGCA      | 650     | 1.5 | 56 |                     | DQ329036 |
| SPARC related modular calcium binding 1        | SMOC1  | <b>24q14</b> | F: GAAAGTCCACTCATGTGACCA<br>R: ACACACCAGCAGTAGCCAGT     | 150     | 1.5 | 60 |                     | CX602091 |
| spectrin repeat containing, nuclear envelope 2 | SYNE2  | 24           | F: TAGTGGAACGTCAACCTCAAG<br>R: ACATGCACCTTCTCTTCAGC     | 106     | 1.5 | 58 |                     | CX597180 |
| microsatellite                                 | TKY036 | 24q14        | F: TGGCTTTTCCTGCTGACTCAT<br>R: TGCTGGGAGGGCTCCCTTTC     | 183     | 2.0 | 58 | Hirota et al. 2001* | AB048342 |
| microsatellite                                 | TKY037 | 24q14        | F: CTCAGGGCCAACAATCCTG<br>R: TCGGTTGTTTCTGAAACTGC       | 151     | 2.0 | 58 | Hirota et al. 2001* | AB048343 |
| microsatellite                                 | TKY307 | 24           | F: CACAGTTCTATCCAAGCGAC<br>R: TAACCATGTCAACAGAGAGG      | 247-257 | 1.5 | 58 | Tozaki et al. 2000c | AB034616 |
| microsatellite                                 | TKY357 | 24           | F: ATCTTCCCTAAAATCGCCAC<br>R: TCTCAGGGATGGTAAATCTG      | 143-163 | 1.5 | 58 | Tozaki et al. 2001  | AB044857 |
| microsatellite                                 | TKY394 | 24           | F: TTGAAGTTGAAGAGCTTGCG<br>R: TGCCAGAGAATCAGTTATGG      | 154-174 | 1.5 | 58 | Tozaki et al. 2001  | AB048299 |
| microsatellite                                 | TKY524 | 24           | F: AGTTGTGGCTTGCTTTCTAC<br>R: TTGCACTTGAGCACTTAGTC      | 241     | 2.0 | 58 | Tozaki et al. 2004  | AB103742 |
| microsatellite                                 | TKY564 | 24           | F: GCCCAGGCAAATACATCATT<br>R: TGAGCTGTGAGCACTCCTTG      | 267-281 | 1.5 | 58 | Tozaki et al. 2004  | AB103782 |
| microsatellite                                 | TKY631 | 24           | F: AGGAAAGCTGCAGGCATAAA<br>R: TTCTGCTGCCAGAGAGAACA      | 101-115 | 2.0 | 58 | Tozaki et al. 2004  | AB103849 |
| microsatellite                                 | TKY756 | 24           | F: TGAAGGGAGCATCCGTTACT<br>R: GGTGGATCTGCCCTCAGTAG      | 139-153 | 1.5 | 58 | Tozaki et al. 2004  | AB103974 |
| microsatellite                                 | TKY782 | 24           | F: TGGACTTGACTTTCACAAGG<br>R: GCAACACATGGGCTCAGAAA      | 154     | 2.0 | 58 |                     | AB104000 |
| microsatellite                                 | TKY831 | 24           | F: CATCAATGGATGGACGGATA<br>R: CTGTCACAAATGGCAGGATT      | 142     | 2.0 | 58 |                     | AB104049 |
| microsatellite                                 | TKY849 | 24           | F: GATCTTAAAAGTCCTTACCACAC<br>R: CACAGATTTAATTGGCACGTGA | 159     | 2.0 | 58 | Tozaki et al. 2004  | AB104067 |



|                                                                  |          |              |                                                         |           |     |    |                                    |          |
|------------------------------------------------------------------|----------|--------------|---------------------------------------------------------|-----------|-----|----|------------------------------------|----------|
| microsatellite                                                   | TKY857   | 24           | F: CTTAGAATGCTCTGTTTCTGAG<br>R: TGCTGTATCCCCTGAATCTA    | 163       | 2.0 | 58 | Tozaki et al.<br>2004              | AB104075 |
| microsatellite                                                   | TKY864   | 24           | F: TGGAGCATCGTCAGTTAAGG<br>R: GCACAGACACAGGCTAGCAG      | 109       | 2.0 | 58 |                                    | AB104082 |
| microsatellite                                                   | TKY982   | 24           | F: ATAAC TTTCTCTCAGCCAC<br>R: GTTGATGAGAGCCCAGAAG       | 232       | 2.0 | 58 |                                    | AB104200 |
| microsatellite                                                   | TKY998   | <b>24q14</b> | F: GAATATCTGATTAGGCTGGC<br>R: AAAGATGCCCTGTTGACTG       | 148       | 2.0 | 58 |                                    | AB104216 |
| microsatellite                                                   | TKY1014  | 24           | F: CACATCAATGAACCAAAC TCTC<br>R: GAGTCTAAGACTCCAGAATTG  | 155       | 2.0 | 58 | Tozaki et al.<br>2004              | AB104232 |
| microsatellite                                                   | TKY1083  | 24           | F: AACCTGTTGAAACCCACAAC<br>R: GTCTAAGAGCAACTCCCAG       | 248       | 2.0 | 58 |                                    | AB104301 |
| microsatellite                                                   | TKY1594  | 24           | F: CCAGAGGCAGCACAATTGA<br>R: CCTGGAAAACGGTAAGTACT       | 153       | 1.5 | 58 |                                    | AB215537 |
| transmembrane<br>emp24-like<br>trafficking protein<br>10 (yeast) | TMED10   | 24           | F: CATTTGTACTGGGTTTCCTCA<br>R: ACCAGAAGCCACCTAAACACT    | 216       | 1.5 | 60 |                                    | DN509189 |
| microsatellite                                                   | UCDEQ467 | 24           | F: CCCC GCAGCCAGCCTGTT<br>R: TTGTTCCCA GTGTAGGCACTCT    | 88 - 108  | 2.0 | 58 | Eggleston-<br>Stott et al.<br>1997 | U67415   |
| microsatellite                                                   | UM012    | 24           | F: GGAATTTAGACTATGACTGAGG<br>R: GCCACCTGAACACTTTTAC     | 100 - 110 | 3.0 | 58 |                                    | AF195131 |
| microsatellite                                                   | UMNe152  | 24           | F: ACAGGTGTT CATCCAAATTTTG<br>R: AAAGTAGAGGAAGACAGGCACG | 144       | 1.5 | 58 | Wagner et<br>al. 2004a             | AY391303 |
| microsatellite                                                   | UMNe210  | 24           | F: AAAAGGGGAAAAACTCCTGAATG<br>R: TCTTTTCCCAA AAGTGTCGG  | 197       | 2.0 | 58 |                                    | AF536292 |
| microsatellite                                                   | UMNe389  | 24           | F: AGGGAACAGCAGCCACAG<br>R: AGTTCATCCTCGACAGGG          | 190       | 2.0 | 65 | Wagner et<br>al. 2004b             | AY464475 |

|                                 |         |    |                                                          |      |     |    |                        |          |
|---------------------------------|---------|----|----------------------------------------------------------|------|-----|----|------------------------|----------|
| microsatellite                  | UMNe533 | 24 | F: CTACGAGAAGTGCTTCAAAAGG<br>R: TGAAATCTGATGATTCTAGCCC   | ~250 | 1.5 | 58 | Wagner et<br>al. 2004b | AY464519 |
| microsatellite                  | UMNe569 | 24 | F: ATGTTATACACTTCATATATATGCTT<br>R: TGAGGAAAAGATGGAGTTGT | ~200 | 4.0 | 50 | Wagner et<br>al. 2004c | AY735273 |
| vaccinia related<br>kinase 1    | VRK1    | 24 | F: GGACTATGCCGAAAAACCTC<br>R: CCATTCTCCACAACACTGAAG      | 114  | 1.5 | 58 |                        | DN506868 |
| tryptophanyl-tRNA<br>synthetase | WARS    | 24 | F: AGTTACAAAGCTGCCACAGG<br>R: GTCCACAAAGTCCTCTCCAG       | 114  | 1.5 | 60 |                        |          |

| Name                                                                  | Symbol    | Horse chr. | Primers                                                | Product size (bp) | MgCl <sub>2</sub> (mM) | T <sub>a</sub> | Reference               | Accession No |
|-----------------------------------------------------------------------|-----------|------------|--------------------------------------------------------|-------------------|------------------------|----------------|-------------------------|--------------|
| v-abl Abelson murine leukemia viral oncogene homolog 1 microsatellite | ABL1      | 25q18-q19  | F: GCAGCCTCTTCCTGTTTCAG<br>R: ACTCCCCGACTGAACGAACAC    | 202               | 1.5                    | 60             | Shubitowski et al. 2001 | AY008765     |
| microsatellite                                                        | AHT007    | 25         | F: CCTTAGATCCGAGAAGGAGA<br>R: GAAGCCTCACTCCATCCAGG     | 121-133           | 2.0                    | 58             | Swinburne et al. 2000   | AJ507668     |
| microsatellite                                                        | AHT051    | 25         | F: ACCTACACACCACTCGTCAAG<br>R: TGCCTTATATTCCTTGTGTGTG  | 146-181           | 2.0                    | 58             | Swinburne et al. 2003   |              |
| angiopoietin-like 2                                                   | ANGPTL2   | 25q18-q19  | F: GCAACTACAACTGCTGGTGA<br>R: GTCTCTGTCCAGGGTGCTG      | 185               | 1.5                    | 58             |                         | CX604237     |
| microsatellite                                                        | COR018    | 25         | F: AGTCTGGCAATATTGAGGATGT<br>R: AGCAGCTACCCTTTGAATACTG | 249-271           | 2.0                    | 58             | Hopman et al. 1999      | AF083461     |
| microsatellite                                                        | COR080    | 25         | F: CGTGCTGCCAGAGGTAAATA<br>R: ACTGAGATGAGGTTTGCTGC     | 198-206           | 2.0                    | 58             | Tallmadge et al. 1999a  | AF142617     |
| catenin (cadherin-associated protein), alpha-like 1                   | CTNNAL1   | 25         | F: CGATGTTGGAGGTTATCTTGG<br>R: CTCGCCTGAGTTGACAGTTC    | 103               | 1.5                    | 58             |                         |              |
| dopamine beta-hydroxylase                                             | DBH       | 25q18-q19  | F: CGAGCCCATCGTCACCGAG<br>R: CCAGGGCCAGGCGGCCAG        | ~180              | 1.5                    | 65             |                         |              |
| exosome component 2                                                   | EXOSC2    | 25q18-19   | F: GGTGAAACGGCAGAAGACTC<br>R: GTGCTCAGGGGTAGGGTAGAT    | 100               | 1.5                    | 67             |                         | DN506159     |
| golgi autoantigen, golgin subfamily a, 1                              | GOLGA1    | 25         | F: CAGGACCCACGTACCAG<br>R: CTAGAAGTTGCTGCTCCAAGC       | 115               | 1.5                    | 58             |                         | CX604753     |
| heat shock 70kDa protein 5                                            | HSPA5     | 25         | F: TGAGAACACGGTCTTTGACG<br>R: TGTTGCTCAACGTTTTCCAG     | 195               | 2.0                    | TD60           | Caetano et al. 1999     | AF134222     |
| nipsnap homolog 3A (C. elegans)                                       | NIPSNAP3A | 25         | F: CTGCATCATTTTCACCATTTG<br>R: CCACCTCCTTCAAATAAAAGTG  | 130               | 1.5                    | 58             |                         |              |
| microsatellite                                                        | NVHEQ043  | 25         | F: TGACACAAGATAAAAGCCCCAGG<br>R: GATTGGGAAAAGAGCACAGCC | 135-159           | 2.0                    | 58             | Roed et al. 1998        | AF056396     |
| pregnancy-associated plasma protein A, pappalysin 1                   | PAPPA     | 25q17-q18  | F: TCACTGTGGGATTCTCATGG<br>R: ACAAGCTTGAGCCTCCTTT      | 221               | 2                      | 58             |                         |              |

|                                          |         |           |                                                          |         |     |    |                     |          |
|------------------------------------------|---------|-----------|----------------------------------------------------------|---------|-----|----|---------------------|----------|
| RAB GTPase activating protein 1 stomatin | RABGAP1 | 25q17-q18 | F: TGAGTTGAGCTTCATTCTTGAG<br>R: GTTTTCTCGTCATCACTTCCA    | 164     | 1.5 | 58 |                     | CX595444 |
|                                          | STOM    | 25q17     | F: AATCAGTGTGGATGGTGTGGTC<br>R: GCAATCTCTTCTCTGTCAGAGAGG | ~180    | 1.5 | 65 |                     |          |
| syntaxin 17                              | STX17   | 25q13     | F: GAGCGGGTATATTTTCGTTGTT<br>R: TGTCCACACATCTCAAGACCT    | 181     | 1.5 | 58 |                     | CX598896 |
| surfeit 2                                | SURF2   | 25        | F: CTTCTGGGAACCTGAGTCCA<br>R: TGTTGTCTCCGTGCTCAGTC       | 267     | 1.5 | 58 |                     |          |
| microsatellite                           | TKY018  | 25        | F: TTTTCGTGACTTAACCCCTCC<br>R: CTTCCCTGAGCAGAGATG        | 136     | 2.0 | 58 | Hirota et al. 2001  | AB048329 |
| microsatellite                           | TKY292  | 25        | F: CCTCAACATCCTTCTAGACG<br>R: AGTACACGTTGAACGTTACC       | 124-134 | 1.5 | 58 | Tozaki et al. 2000c | AB034601 |
| microsatellite                           | TKY302  | 25        | F: TACATGGTGAGAAATAAGCACC<br>R: ATCTGCATCCTAGCTCACTG     | 95-101  | 1.5 | 58 | Tozaki et al. 2000c | AB034611 |
| microsatellite                           | TKY316  | 25        | F: CACATTCTTCCGGTCACAAC<br>R: TGTTTAGGGACACTAAACGC       | 282-294 | 1.5 | 58 | Tozaki et al. 2000c | AB034625 |
| microsatellite                           | TKY429  | 25        | F: AACAAATGGACAAGCACGTAC<br>R: GTCCTTCAGGGAAAATCTGTG     | 111     | 2.0 | 58 |                     | AB103647 |
| microsatellite                           | TKY575  | 25        | F: CAGACCTGAGTCCCAGAGGA<br>R: CCATTCCAGGAAATGACCTT       | 206-208 | 1.5 | 58 | Tozaki et al. 2004  | AB103793 |
| microsatellite                           | TKY771  | 25        | F: CAGTCCTCTCACTCCAACCT<br>R: GGACAGGTAAAGGTGGTATG       | 198     | 2.0 | 58 | Tozaki et al. 2004  | AB103989 |
| microsatellite                           | TKY851  | 25        | F: GGTCTTCTGGACAGAAAGTG<br>R: AGCATCATCGTTATTCCCCT       | 255     | 2.0 | 58 |                     | AB104069 |
| microsatellite                           | TKY1064 | 25        | F: GGATTAGGGAAGACTTCTCA<br>R: TCAGTTTCATGCCTTCACTC       | 190     | 2.0 | 58 |                     | AB104282 |
| microsatellite                           | TKY1065 | 25        | F: TAGTTAATGGTCAAGCCAGG<br>R: GTCTTCCCTCTCACTCAATG       | 116     | 2.0 | 58 |                     | AB104283 |
| microsatellite                           | TKY1096 | 25        | F: ATTCAAAAGCCAAGCCCTTG<br>R: TAAAACAGGAGCGGTTTCATG      | 277     | 2.0 | 58 |                     | AB104314 |
| microsatellite                           | TKY1104 | 25        | F: GACCTACGGCTAGAATATAC<br>R: GGTACCTACTTCAGGATTAG       | 197     | 2.0 | 58 |                     | AB104322 |
| microsatellite                           | TKY3347 | 25        | F: AGTTTCTCTCTCCCCTGCAT<br>R: GGCAGGTCTAGCCTTTCTTC       | 239     | 1.5 | 58 | Tozaki et al. 2007  | AB217290 |
| toll-like receptor 4                     | TLR4    | 25q17     | F: GTGCAATACCCTTACAGATGC<br>R: ATGCTTTCACCTCTCCCATAC     | 196     | 1.5 | 58 |                     |          |

|                                  |          |           |                                                            |         |     |    |                               |          |
|----------------------------------|----------|-----------|------------------------------------------------------------|---------|-----|----|-------------------------------|----------|
| transmembrane protein 15         | TMEM15   | 25        | F: GTCCCAGGTATCGTCTTTGAC<br>R: GATGTGTGTCAGGATGAGTGG       | 183     | 1.5 | 58 |                               |          |
| transmembrane protein 38B        | TMEM38B  | 25        | F: CCAGGGCTATTCTTTCCCTACC<br>R: GCTATCAGCATGTGTGACTCC      | 100     | 1.5 | 60 |                               | DN507625 |
| tropomodulin 1                   | TMOD1    | 25q12-q13 | F: CAGAAGGATCAGACCACCAAG<br>R: CTCGCTTTTCCCCTGTGTAG        | 130     | 1.5 | 66 |                               |          |
| TNF receptor-associated factor 1 | TRAF1    | 25        | F: GGAAGCTGCGTGTGTTTGAG<br>R: TGTTCCAGGCTCAGGATGTG         | 127     | 1.5 | 58 |                               |          |
| thioredoxin                      | TXN      | 25        | F: TGGTGGCTTCAAGTTTTTCC<br>R: GCCCCCAAGGATGTTAATTT         | 187     | 2.0 | 58 | Caetano et al. 1999           | AF134237 |
| microsatellite                   | UCDEQ405 | 25        | F: ACCTCGTCTGGCTGTTGTAAG<br>R: ACTTGCTGTGCGACTCTG          | 256-274 | 2.0 | 58 | Eggleston-Stott et al. 1997   | AF000010 |
| microsatellite                   | UMNe160  | 25        | F: TGGAAGGATTCTCCCCAAG<br>R: GTTGCTCCAATGCCATACTC          | 114     | 1.5 | 58 | Wagner et al. 2004a           | AY391306 |
| microsatellite                   | UMNe339  | 25q17-q18 | F: TCATTTTGCACGAAAGAAAGC<br>R: GAAGTGAAAGGCTTAAGCTGC       | 103     | 2.0 | 58 |                               |          |
| microsatellite                   | UMNe362  | 25        | F: GAGAGAGAGAGTATGCGCGC<br>R: GATTCCAAAGGCTATCCACTC        | 117     | 2.0 | 58 | Wagner et al. 2004a           | AY391350 |
| microsatellite                   | UMNe416  | 25        | F: ACTTTCTAGCCTGCCCTATGG<br>R: CCTAACCCTCATCCACTTGTG       | 134     | 2.0 | 62 |                               |          |
| microsatellite                   | UMNe525  | 25        | F: CAACCACTCCCTTTCTCCAG<br>R: AATGGCCAAAGGTAGCCAC          | 152     | 1.5 | 62 | Wagner et al. 2004c           | AY735259 |
| microsatellite                   | UMNe598  | 25q18-q19 | F: CTGTCCTTAGTCTGGTCC<br>R: GATCCTCATTTTATACCC             | 146     | 1.5 | 50 | Mickelson et al. 2004         | AY735290 |
| microsatellite                   | ZuBeEq12 | 25        | F: CTTCTTGACCCCAACACGCTCACA<br>R: GCATCCTGCTGGGACCCTCTTTGA | 193     | 1.5 | 68 | Klukowska-Rotzler et al. 2006 | CR956107 |

| Name                                                       | Symbol           | Horse chr. | Primers                                                        | Product size (bp) | MgCl <sub>2</sub> (mM) | T <sub>a</sub> | Reference          | Accession No |
|------------------------------------------------------------|------------------|------------|----------------------------------------------------------------|-------------------|------------------------|----------------|--------------------|--------------|
| sequence tagged site                                       | 26STS02 (4ES)    | 26         | F: CGCATTCGAGAATTCGCAC<br>R: GAAATCGCGTTATTACCGAC              | 109               | 2.0                    | 55             |                    |              |
| sequence tagged site                                       | 26STS03 (GP2)    | 26         | F: CGCTTATGCAGAGAGCCATG<br>R: GAGTGCGTGAGTAATGAGTC             | 177               | 2.0                    | 55             |                    |              |
| microsatellite                                             | A-17             | 26q13-q14  | F: GTGGAGAGATAAAAGAAGATCC<br>R: GGCCACAAGGAATGAACACAC          | 95-111            | 3.0                    | 58             | Marti et al. 1998* | X94446       |
| ADAM metalloproteinase with thrombospondin type 1 motif, 5 | ADAMTS5          | 26         | F: CGTGGTGAATAAGAGGTCACA<br>R: GCCCAGGTGATGTTCAATAAC           | 177               | 1.5                    | 58             |                    | CX598584     |
| amyloid beta (A4) precursor protein                        | APP              | 26         | F: AGAACTAGACTACCGCCGCA<br>R: TGGGTCACAAACCACAAGAA             | 374               | 2.0                    | 58             |                    | AY011366     |
| BTG family, member 3                                       | BTG3             | 26         | F: GTCACTACCCTCCTCCTGTTC<br>R: GGTTCGCCCCATCTAACTTT            | 261               | 1.5                    | 58             |                    | CX595745     |
| chromosome 21 open reading frame 34                        | C21orf34         | 26         | F: TAGGCAAAGCATGTGAGCTG<br>R: GGGGAAAAGAAGGAAGGAAAC            | 462               | 1.5                    | 58             |                    | AJ618767     |
| carbonyl reductase 1                                       | CBR1             | 26         | F: TGAGACCATCACAGAAGAGGA<br>R: GCTCACCATTGTTTGACTTTC           | 357               | 2                      | 62             |                    | CX603498     |
| CGG triplet repeat binding protein 1                       | CGGBP1           | 26         | F: GAGTGGTCATTTGGTGCTTAGTC<br>R: TACCTCAGAAATCTGATAGCGTG       | 240               | 3.0                    | 58             |                    | G62184       |
| BAC end sequence                                           | CH241-100G23_SP6 | 26         | F: ATCCATCAAGATGCCCTGTG<br>R: ATCACCCCATTGGTACTCAC             | 392               | 1.5                    | 58             |                    | AJ542940     |
| BAC end sequence                                           | CH241-102G11_SP6 | 26         | F: TCCCAAAATGTGTTTCACCTC<br>R: TGCATAGCTCATTATGATACTGGAA       | 696               | 1.5                    | 58             |                    | AJ584196     |
| BAC end sequence                                           | CH241-109H15_T7  | 26         | F: TGAATGAATATAATTAACATGGGAAG<br>R: TCGGTTTAATTGTAAATTTAGGAACC | 356               | 1.5                    | 58             |                    | CT006207     |
| BAC end sequence                                           | CH241-111N13_SP6 | 26         | F: CCCCAGGAACAGGTCTGATA<br>R: TATGGGCGAAGGAATTC AAG            | 325               | 1.5                    | 58             |                    | CR955725     |
| BAC end sequence                                           | CH241-112C9_SP6  | 26         | F: GGTGTGGTTGTAAGGGCAAC<br>R: ACATGGCATGCATCGTTATC             | 567               | 1.5                    | 58             |                    | CR955681     |
| BAC end sequence                                           | CH241-           | 26         | F: TTCCCTCCCTGATATCTTTCC                                       | 349               | 1.5                    | 58             |                    | CR957276     |

|                                                                   |                  |           |                                                             |         |     |    |                                             |                      |
|-------------------------------------------------------------------|------------------|-----------|-------------------------------------------------------------|---------|-----|----|---------------------------------------------|----------------------|
| BAC end sequence                                                  | 112M19_T7        |           | R: TGAAATGGTAGCCGTCTAGG                                     |         |     |    |                                             |                      |
|                                                                   | CH241-112P17_SP6 | 26        | F: TGGAGATACTGCTGCACGAC<br>R: GGTTTTAGAAACAGCCATTTGC        | 557     | 1.5 | 58 |                                             | CR955487             |
| BAC end sequence                                                  | CH241-113E17_SP6 | 26        | F: ACATTTGCCATGCATTCCTC<br>R: GGACGTGAGAAAATGGAAGC          | 656     | 1.5 | 58 |                                             | CR955553             |
| BAC end sequence                                                  | CH241-114I13_SP6 | 26        | F: TTCTAGATTTAAAAATTTTCCTGTGG<br>R: GGCAGAGGAGCAGAAACAAC    | 443     | 1.5 | 58 |                                             | CT006985             |
| BAC end sequence                                                  | CH241-115F4_SP6  | 26        | F: ACTTACCGTAATGGCGGTTG<br>R: CCCCCATCCTGTATCTCCAC          | 291     | 1.5 | 58 |                                             | CT007664             |
| microsatellite                                                    | COR071           | 26        | F: CTTGGGCTACAACAGGGAATA<br>R: CTGCTATTTCAAACACTTGGA        | 178-200 | 2.0 | 58 | Tallmadge et al. 1999a                      | AF142608             |
| microsatellite                                                    | COR099           | 26        | F: GAAAAGAAATTCCAGGTCC<br>R: CCTTGGAAAACAATGACTGG           | 158-160 | 3.0 | 50 | Tallmadge et al. 1999b                      | AF154952             |
| cystatin B                                                        | CSTB             | 26q16     | F: AGGTTGGCGATGACGACT<br>R: CCTGGCTTTGTTGGTCTGAT            | 101     | 1.5 | 58 |                                             | DN509356             |
| Down syndrome critical region gene 1                              | DSCR1            | 26q15     | F: GTCCTTTGGAAATACCTAATGCCG<br>R: ACGTCACTAGGAACACTTGACAGCT | 206     | 3.0 | 58 | Chowdhary et al. 2003*                      |                      |
| dual-specificity tyrosine-(Y)-phosphorylation regulated kinase 1A | DYRK1A           | 26        | F: ACTTTCGAGCGGTTGAATTG<br>R: AACTACTGAATTCCTTGTGATATTGC    | 444     | 1.5 | 59 |                                             | CX592800             |
| microsatellite                                                    | EB2E8            | 26q15     | F: GGGGTTGTGGAGAATGTCTG<br>R: CCACAGGTTTTTCATGGGTCT         | 197     | 3.0 | 58 | Gralak et al. 1994;<br>Lindgren et al. 2001 | Z29340               |
| v-ets erythroblastosis virus E26 oncogene homolog (avian)         | ERG              | 26        | F: GCTCCAACTCCAACGTATCA<br>R: CCGAGGGGTACTTGTAGAGAG         | 270     | 1.5 | 63 |                                             | CX597452             |
| v-ets erythroblastosis virus E26 oncogene homolog 2 (avian)       | ETS2             | 26q16-q17 | F: TCCTTGCTTGGCTGAGAATC<br>R: AGAGCATGAAGCCCAGCTTA          | 208     | 1.5 | 60 | Lear et al. 1998                            | AF053637<br>AF134064 |

|                                                               |                              |           |                                                               |         |     |    |                                           |          |
|---------------------------------------------------------------|------------------------------|-----------|---------------------------------------------------------------|---------|-----|----|-------------------------------------------|----------|
| phosphoribosylglycinamide formyltransferase                   | GART                         | 26        | F: TGCTCAACATACACCCATCC<br>R: AAAGCCACCATGCAAACAG             | 500     | 1.5 | 60 |                                           | CX601789 |
| glucan (1,4-alpha-), branching enzyme 1                       | GBE1<br>( <i>GBE1</i> exon2) | 26q12-q13 | F: CCAACATGATGGTTCTGACC<br>R: GAGTGCGTGAGTAATGAGTC            | 232     | 1.5 | 58 | Ward et al. 2003*                         | AY301014 |
| microsatellite                                                | GBEm1                        | 26        | F: GGAAAGACATCTTGCACCAC<br>R: TGCACCCATAACGCAAAG              | 230     | 1.5 | 65 | Ward et al. 2003                          |          |
| 5-hydroxytryptamine (serotonin) receptor 1F                   | HTR1F                        | 26        | F: GTGATGCCCTTCAGCATTGTG<br>R: TGCAATYCTACTTGCTTGTCT          | 433     | 2.0 | 58 | Ward et al. 2003                          | AY301022 |
| interferon gamma receptor 2                                   | IFNGR2                       | 26        | F: TTCATGACCAACTCCATTGTG<br>R: TCTATTTGTACTGGGATGCTTGG        | 700     | 1.5 | 60 |                                           | BM781196 |
| interleukin 10 receptor, beta                                 | IL10RB                       | 26        | F: TACCACCTTGATGGAATGTGA<br>R: GTCATCCACAGGACAGAAGG           | 127     | 1.5 | 58 |                                           |          |
| junctional adhesion molecule 2                                | JAM2<br>( <i>JAM</i> )       | 26        | F: TTTCAAGCACACAAAATCCTTT<br>R: TTTGCAAATGTAAGACAAAGCTG       | 120     | 1.5 | 55 | Perrocheau et al. 2006                    | DX010637 |
| potassium voltage-gated channel, Isk-related family, member 2 | KCNE2                        | 26        | F: ATCCAAGCGACGAGAACACT<br>R: GGTGGCCTTTGGTTCCTCTA            | 115     | 2.0 | 58 |                                           | AF387764 |
| potassium inwardly-rectifying channel, subfamily J, member 6  | KCNJ6                        | 26        | F: CTGGGGGAAGGGTATTTGAG<br>R: ATGCTCATGGATGCTTTTCC            | 548     | 1.5 | 58 |                                           | AJ885649 |
| microsatellite                                                | LEX044                       | 26q13-q15 | F: TTGGGCTTCTTATCTTGTTAC<br>R: GGCCATATGATTTGCTTT             | 191-205 | 3.0 | 58 | Coogle et al. 1997; Lindgren et al. 2001* | AF075646 |
| LOC391271 protein                                             | LOC391271                    | 26        | F: CCCCCGGAATTATTCTTCAC<br>R: CTGCTTGAGAATTGGAAGTGG           | 587     | 1.5 | 58 |                                           | AJ584005 |
| MORC family CW-type zinc finger 3                             | MORC3                        | 26        | F: ATATTATATCTGAAGCCAAGGATGC<br>R: ACTGACATCCAACCTTTTTCATAAGC | 500     | 1.5 | 60 |                                           | CX596098 |
| myxovirus                                                     | MX1                          | 26q16-    | F: CTGAGAACAACCTGTACAGCCA                                     | ~200    | 1.5 | 60 |                                           |          |



|                                                                       |          |           |                                                                             |         |     |    |                           |                      |
|-----------------------------------------------------------------------|----------|-----------|-----------------------------------------------------------------------------|---------|-----|----|---------------------------|----------------------|
| (influenza virus)<br>resistance 1<br>microsatellite                   | NVHEQ070 | q17<br>26 | R: TCCAGCACGGAGCTCTTG<br>F: GCTGGTCAAGTCACACTGTG<br>R: AACCTCACCCCAAGTTGTAT | 189-203 | 2.0 | 58 | Roed et al.<br>2000       | AJ245765<br>AJ576675 |
| oligodendrocyte<br>transcription factor<br>1                          | OLIG1    | 26        | F: TCAGGACTGTCACCTGCAAC<br>R: CACCAGAGAAACCCACCATC                          | 693     | 1.5 | 58 |                           |                      |
| POU domain, class<br>1, transcription<br>factor 1                     | POU1F1   | 26q12     | F: CTGGAGAGACACTTTGGAGAA<br>R: TCACYCGTTTTTCTCTCTGYC                        | 121     | 2.0 | 55 | Ward et al.<br>2003*      | AY301021             |
| roundabout, axon<br>guidance receptor,<br>homolog 1<br>(Drosophila)   | ROBO1    | 26        | F: AACCASTTACAAYAGTTCCAG<br>R: GCAGATCGACAGCCAATTC                          | 107     | 1.5 | 55 | Ward et al.<br>2003       | AY301019             |
| roundabout, axon<br>guidance receptor,<br>homolog 2<br>(Drosophila)   | ROBO2    | 26q14     | F: TCCAAGRCACAGCTGGARG<br>R: CAGTTTCCTCTAATTCTT                             | 231     | 1.5 | 58 | Ward et al.<br>2003*      | AY301020             |
| runt-related<br>transcription factor<br>1                             | RUNX1    | 26        | F: GGATCTGCTTGCTGTCCAAG<br>R: AAACAAACAAAAATCCCCAAAC                        | 391     | 1.5 | 60 |                           | CX598164             |
| S100 calcium<br>binding protein B                                     | S100B    | 26q17     | F: GTAACAGAGACGACCCAAGGA<br>R: CCAGCCAGCTAACACGTATG                         | 196     | 1.5 | 58 |                           | CX604272             |
| SAM domain, SH3<br>domain and<br>nuclear<br>localization signals<br>1 | SAMSN1   | 26        | F: CTCCGCTTTTTTCAGGTCAAG<br>R: AACAGGAGGAGAACGAGACG                         | 595     | 1.5 | 58 |                           | AJ885556             |
| SH3 domain<br>binding glutamic<br>acid-rich protein                   | SH3BGR   | 26        | F: TAGGAAGAAGCAGCAAGAAGTC<br>R: CCCAGGAACATTCTCTCTCAT                       | 118     | 1.5 | 60 |                           |                      |
| T-cell lymphoma<br>invasion and<br>metastasis 1                       | TIAM1    | 26q15     | F: AAGCAAGTCTCTTGGGAGGAG<br>R: TCTCCTTGATGTCATCCTGCT                        | 188     | 1.5 | 55 | Perrocheau<br>et al. 2006 | DX010596             |
| microsatellite                                                        | TKY275   | 26        | F: TCTCAGTGGATATAACTAGC<br>R: GAGATGGATACAGATAGAAG                          | 144-154 | 3.0 | 50 | Tozaki et al.<br>2000b    | AB033926             |
| microsatellite                                                        | TKY386   | 26        | F: GGACAAGTCTATAGCAAGAG                                                     | 311-313 | 2.0 | 55 | Tozaki et al.             | AB048292             |

|                                                 |         |    |                                                       |         |     |    |                                          |          |
|-------------------------------------------------|---------|----|-------------------------------------------------------|---------|-----|----|------------------------------------------|----------|
|                                                 |         |    | R: GCACTTGTCTCCCTAATTTTC                              |         |     |    | 2001                                     |          |
| microsatellite                                  | TKY502  | 26 | F: ACGGAAAACGTATGCCACTC<br>R: AGTGGGGACTTTGTTGAGGA    | 220-228 | 1.5 | 55 | Tozaki et al. 2004                       | AB103720 |
| microsatellite                                  | TKY664  | 26 | F: TACTGCCCTTGGCTGACTCT<br>R: CAGAACATGAACCCCTCCAG    | 241-261 | 1.5 | 58 | Tozaki et al. 2004                       | AB103882 |
| microsatellite                                  | TKY766  | 26 | F: ACTTTGCACCTGTGCAAAAAG<br>R: CTGATTCTTGGCATCTGGAAA  | 100     | 2.0 | 58 | Tozaki et al. 2004                       | AB103984 |
| microsatellite                                  | TKY767  | 26 | F: GTGAACATGACAGTTCATATGG<br>R: GACTACACTCTTTCCTTGTCT | 90      | 2.0 | 58 | Tozaki et al. 2004                       | AB103985 |
| microsatellite                                  | TKY778  | 26 | F: CTTAGATGGAGTCCTCCTAC<br>R: GGGTTCCTTTTACCTTCTCC    | 208     | 2.0 | 58 | Tozaki et al. 2004                       | AB103996 |
| microsatellite                                  | TKY794  | 26 | F: CAAACGCCCAGCAGAGTG<br>R: AGTCTGCAACTAACTCTCAG      | 199     | 2.0 | 58 | Tozaki et al. 2004                       | AB104012 |
| microsatellite                                  | TKY846  | 26 | F: TCAAACCATCTGCTCAGAAG<br>R: AAATCCCAATCTGAGGGTAG    | 188     | 2.0 | 58 | Tozaki et al. 2004                       | AB104064 |
| microsatellite                                  | TKY934  | 26 | F: TTCCAGTGGTTAGGATGTAG<br>R: TTGAGCATAGTGATAGCATATG  | 141     | 2.0 | 58 | Tozaki et al. 2004                       | AB104152 |
| microsatellite                                  | TKY1017 | 26 | F: ATGTCAAGGTCTAGTGTTCC<br>R: GCTCCTTCCTCTGGTGTA      | 124     | 2.0 | 58 |                                          | AB104235 |
| microsatellite                                  | TKY1155 | 26 | F: TGACAACCTGATATCAGCTCAG<br>R: ACCTTTTACACATGAGCCAG  | 281     | 2.0 | 58 |                                          | AB104373 |
| microsatellite                                  | TKY1233 | 26 | F: CTCTAGGAAGCCAGAACTG<br>R: CACCTTCCCGTCTCTAATG      | 179     | 1.5 | 58 | Tozaki et al. 2007                       | AB215176 |
| microsatellite                                  | TKY3385 | 26 | F: CACCAGGGAAAAGTACATGG<br>R: TCCCTCACCTCTGGTTATGA    | 180     | 1.5 | 58 | Tozaki et al. 2007                       | AB217328 |
| ubiquitin protein<br>ligase E3A<br>pseudogene 2 | UBE3AP2 | 26 | F: TGCACAGTTGCATGACTTTC<br>R: CCAGCGCCTATTTATCCAAC    | 617     | 1.5 | 58 |                                          | AJ885744 |
| microsatellite                                  | UM031   | 26 | F: GCTCAAACCAACCTTTCAAAC<br>R: TCAGGCCTTAAAACAGACACAC | ~200    | 1.5 | 58 | George et al. 1998                       | AF195578 |
| microsatellite                                  | UMNe66  | 26 | F: GAATCCCATCTTTCCTTTCAG<br>R: ACGTGGAGAATTATCCTGCG   | 124     | 1.5 | 58 | Roberts et al. 2000;<br>Ward et al. 2003 | AF191699 |
| microsatellite                                  | UMNe127 | 26 | F: TTATAAATCACCCTGTTTACACAC<br>R: TCTTGAAGCAGGATGGGC  | 135     | 1.5 | 58 | Wagner et al. 2004                       | AY391298 |
| microsatellite                                  | UMNe153 | 26 | F: GTGCTGGAGTGAGCTGACC                                | ~150    | 1.5 | 58 | Mickelson et                             | AF536265 |

|                                    |         |       |                                                         |      |     |    |                                  |          |
|------------------------------------|---------|-------|---------------------------------------------------------|------|-----|----|----------------------------------|----------|
|                                    |         |       | R: ATCCAAATCGGAGACCATATG                                |      |     |    | al. 2003;<br>Ward et al.<br>2003 |          |
| microsatellite                     | UMNe188 | 26    | F: GTTAACAAGGATTGTTTTGGGC<br>R: TGC GTTTCTGCTTCTCCC     | 132  | 2.0 | 58 | Wagner et<br>al. 2004            | AY391317 |
| microsatellite                     | UMNe434 | 26    | F: TCTGCTGTTGGCCATCATC<br>R: ACCTGCCTGCAAAACCTTC        | 268  | 1.5 | 58 |                                  |          |
| microsatellite                     | UMNe444 | 26    | F: CGGTCTTGCTTGGGTTAGTC<br>R: AAGGGTCTTCTCAGCAGAAGG     | 273  | 1.5 | 58 |                                  |          |
| microsatellite                     | UMNe542 | 26    | F: TGAAAGAGACCATAACGATGC<br>R: CACGACTTAGAGACGTGTGAGC   | 252  | 1.5 | 62 | Wagner et<br>al. 2004            | AY735263 |
| microsatellite                     | UMNe547 | 26    | F: CTGCCATTTCATCAGAAAATCTC<br>R: TCAATCATTTTGTACTCATGGC | ~150 | 1.5 | 58 | Wagner et<br>al. 2004b           | AY464522 |
| microsatellite                     | UMNe559 | 26    | F: CTTCCCATTTCTCTATCACCCC<br>R: CTGTTCTCCCAATTCTTTCTGG  | 160  | 1.5 | 58 |                                  |          |
| microsatellite                     | UMNe588 | 26    | F: CGCAGGTAGACTGTGTTAGGC<br>R: CAAGACTGGAAATTTCAAGGG    | 144  | 1.5 | 58 |                                  |          |
| ubiquitin specific<br>peptidase 16 | USP16   | 26    | F: ACCCTTAGAAATAAACCTTGAGC<br>R: CTGTCCTTGCTGCTGATAGCC  | 489  | 1.5 | 58 |                                  |          |
| ubiquitin specific<br>peptidase 25 | USP25   | 26q13 | F: AGCTGCTTGATTGTTCTACGG<br>R: AGGAAGGCAAGGGCTAAGAAC    | 200  | 1.5 | 55 | Perrocheau<br>et al. 2005        | AY817489 |

| Name                                                         | Symbol                                   | Horse chr.      | Primers                                                   | Product size (bp) | MgCl <sub>2</sub> (mM) | T <sub>a</sub> | Reference                           | Accession No |
|--------------------------------------------------------------|------------------------------------------|-----------------|-----------------------------------------------------------|-------------------|------------------------|----------------|-------------------------------------|--------------|
| microsatellite                                               | 27CA001                                  | 27              | F: CGATCCAGGGTTCTGTGAGT<br>R: TCCATTCCCTCAGGCATCTTC       | 251               | 2.5                    | 58             |                                     |              |
| sequence tagged site                                         | 27STS01<br>( <i>Fell Pony Syndrome</i> ) | 27              | F: GTGTGAACAAGGGTGATCTGG<br>R: CAAGCCTGGTCTCGTAAACGC      | 430               | 2.0                    | 58             |                                     |              |
| sequence tagged site                                         | 27STS02                                  | 27              | F: GATGCCAGCAGTGATGAAGA<br>R: CCACAGGCTCTGTCTCCTGT        | 160               | 1.5                    | 60             |                                     | CX595237     |
| adrenergic, beta-3-, receptor                                | ADRB3                                    | <b>27q12-13</b> | F: GCAACCTGCTGGTAATCGTG<br>R: CTCATGATGGGCGCAAAC          | 364               | 1.5                    | 56             |                                     |              |
| aspartylglucosaminidase                                      | AGA                                      | 27              | F: GTCTGGAGAAACCACACTGG<br>R: TCCTACTAAAAGCGTGTGTGC       | ~729              | 1.5                    | 58             |                                     | CX600750     |
| microsatellite                                               | AHT074                                   | 27              | F: GAGGAAAGATTGGCACAGATG<br>R: ATGGGATGAACCACAGCAC        | 119-121           | 1.5                    | 62             | Swinburne et al. 2003               | AJ507691     |
| microsatellite                                               | AHT082                                   | 27              | F: TGCCTATTGTTTGAGGAGGG<br>R: GCCAGTACAAATTGGGCAGT        | 203-209           | 2.0                    | 58             | Swinburne et al. 2003               | AJ507699     |
| ankyrin 1, erythrocytic                                      | ANK1                                     | <b>27q14</b>    | F: GTGGCTCATTTCTGTCTC<br>R: AACTCGAGATTGCTAAGTGG          | 307               | 2.0                    | 63             |                                     |              |
| microsatellite                                               | ASB38                                    | 27              | F: TGGGGTTGCCCTTGTTACC<br>R: TCAGAGGATGAGGCACAGC          | 111-119           | 2.0                    | 58             | Irvin et al. 1998; Lear et al. 1999 | AF004768     |
| microsatellite                                               | ASB5                                     | 27              | F: CAAAAAGGCAAATATTGGGATAC<br>R: CTTGATCTTCCTATGTAGTTTCTG | 1335              | 1.5                    | 58             |                                     |              |
| ash2 (absent, small, or homeotic)-like ( <i>Drosophila</i> ) | ASH2L                                    | 27q14-q15       | F: TCCTGTCTACCTTTCATGACCA<br>R: GATGTTTCATCCTGCGTTCG      | 428               | 1.5                    | 60             |                                     |              |
| caspase 3                                                    | CASP3                                    | 27              | F: TGGTACAGATGTGGATGCAG<br>R: GCAACAATCCCCTTTGAAG         | 577               | 1.5                    | 58             |                                     | CD467628     |
| CDKN2A interacting protein                                   | CDKN2AIP<br>( <i>FLJ20036</i> )          | 27q16           | F: TGGAACTAAAGCCACCAACAG<br>R: GTCCCAGCTGGCTTCTAAGAG      | 203               | 1.5                    | 55             | Perrocheau et al. 2006*             | DX010482     |

|                                       |                 |              |                                                            |           |     |    |                     |          |
|---------------------------------------|-----------------|--------------|------------------------------------------------------------|-----------|-----|----|---------------------|----------|
| BAC end sequence                      | CH241-10E15_SP6 | 27           | F: AGAGCATTGAAAAGGGAGCA<br>R: TTTGTTGGTTACCCCAAACC         | 203       | 1.5 | 58 |                     | CT839565 |
| BAC end sequence                      | CH241-34I24_SP6 | 27           | F: AAGGGATCAAGTTTCCCACA<br>R: CAGTTGGTTGGAACAATGCTT        | 222       | 1.5 | 58 |                     | CT958650 |
| BAC end sequence                      | CH241-3I14_T7   | 27           | F: GAGGCCTGAGACCTGCAGTA<br>R: AGTCTTGGCCACCAATCTGA         | 211       | 1.5 | 58 |                     | CT826489 |
| BAC end sequence                      | CH241-84O15_SP6 | 27           | F: TTGCTTATGTGCTTGCTCTGA<br>R: ATGCGAGGAATGTTTTTCAGC       | 229       | 1.5 | 58 |                     | CU016897 |
| ceroid-lipofuscinosis, neuronal 8     | CLN8            | 27           | F: GCTGTCGTCTCCCTGAAC<br>R: CTAGATAGTGGCCGGCTTTG           | 347       | 1.5 | 60 |                     | CX603545 |
| microsatellite                        | COR017          | 27           | F: GAAGGCCTGAAGCATTTACA<br>R: CGTAATGTTGACCAAACCTTCA       | 235 - 253 | 2.0 | 58 | Hopman et al. 1999  | AF083460 |
| microsatellite                        | COR031          | 27           | F: CAATTGCCATTTGTTCCAGTG<br>R: GCTTAAGAAACACCAGGCAG        | 214       | 1.5 | 58 | Murphie et al. 1999 |          |
| microsatellite                        | COR040          | 27           | F: GTGTTGGGACACGAATGAAT<br>R: AGGCTGTCTCCAGAGTCCTT         | 275-289   | 2.0 | 58 | Murphie et al. 1999 | AF101409 |
| ER lipid raft associated 2            | ERLIN2          | 27           | F: TGGTGGTGTGATGATCTACTTTG<br>R: AAGCGTGTGTACACTGCAGAA     | 317       | 2.0 | 62 |                     |          |
| dCMP deaminase                        | DCTD            | 27           | F: ACAGCAGACCGACTCAGAAG<br>R: GTTATGTGTAACCTGCGAGACGA      | 115       | 1.5 | 58 |                     | CX603647 |
| deleted in liver cancer 1             | DLC1            | 27           | F: GGCTGGTGGAGCTGATTTAG<br>R: CTTCTCCAGGCCATTTTCAG         | 391       | 1.5 | 64 |                     | CX598743 |
| coagulation factor XI                 | F11             | 27           | F: AGAAGGGGGATTGGGTACAG<br>R: TTCTGGATGCTGGTGTTTGA         | 218       | 1.5 | 52 |                     | CT974651 |
| fibroblast growth factor receptor 1   | FGFR1           | 27q14-q15    | F: AGATAGGGGATTTGCAC<br>R: TGAAATTTATGGGCTAGAAC            | 210       | 2.0 | 55 |                     |          |
| farnesyltransferase, CAAX box, alpha  | FNTA            | <b>27q14</b> | F: GCAAACACAGCACAGAAAGTG<br>R: AGGAAACAATCACATTACTTAGAGC   | 248       | 1.5 | 60 |                     | CX597111 |
| GIN5 complex subunit 4 (Sld5 homolog) | GIN54           | 27           | F: CCAAACCCGATCTAGATTTCCT<br>R: GTACTGCTCCAGAGGCAACC       | 265       | 1.5 | 60 |                     | DN505633 |
| general transcription factor IIE,     | GTF2E2          | 27           | F: AGTCAATAATCCCCAAAATTGAAGT<br>R: GCAGTCCTTCCTCTATGTCTTCT | 155       | 1.5 | 58 |                     | DN506260 |

|                                                                                   |                              |              |                                                      |         |     |    |                                                     |          |
|-----------------------------------------------------------------------------------|------------------------------|--------------|------------------------------------------------------|---------|-----|----|-----------------------------------------------------|----------|
| polypeptide 2,<br>beta 34kDa<br>microsatellite                                    | HMS45                        | 27q16        | F: TGGTAAACTGTGCATGATTGG<br>R: AAAGGAAGATTGGCAAACCA  | 215     | 3.0 | 58 | Godard et al.<br>1997*;<br>Chowdhary et<br>al. 2003 | U89813   |
| indoleamine-<br>pyrrole 2,3<br>dioxygenase<br>microsatellite                      | INDO                         | 27           | F: CTTGCTCATTAGAGTCAGGC<br>R: GCAAATGGTAGCTTCTCAGGG  | 124     | 1.5 | 58 |                                                     |          |
|                                                                                   | LEX005                       | 27q16        | F: AAGGCAATGCTTATCAAATGC<br>R: TTACCCGCAGTGACTTCTATT | 245-265 | 3.0 | 58 | Coogle et al.<br>1996;<br>Lindgren et al.<br>2001*  | AF075609 |
| myomesin 2,<br>165kDa                                                             | MYOM2                        | <b>27q18</b> | F: CGAGGACATTGGGGATAATG<br>R: GGATCCAAGACAAAGCTGGA   | 245     | 1.5 | 60 |                                                     |          |
| neuregulin 1                                                                      | NRG1                         | 27           | F: TAGGAAATGACAGTGCCTCT<br>R: TCAGGTCTATACCACCTCAC   | 242     | 2.0 | 62 |                                                     |          |
| pericentriolar<br>material 1                                                      | PCM1                         | 27           | F: AGCCCGAAGAAGAAGTGGA<br>R: TACTGTTGCCGGATCTACTGG   | 224     | 4.0 | 58 |                                                     |          |
| platelet-<br>derived growth<br>factor<br>receptor-like<br>PDZ and LIM<br>domain 3 | PDGFRL                       | 27q16-17     | F: AAAGGAGCCAGGAGAGAACAG<br>R: TTCCTTTACATCGAAGCTCCA | 206     | 1.5 | 55 | Perrocheau et<br>al. 2006                           | DX010552 |
| RNA binding<br>motif protein<br>13                                                | PDLIM3                       | 27           | F: CCCTTCTTCTGTCAGTACTC<br>R: TGAGTACAACTGCATAGGTGTA | 148     | 1.5 | 60 |                                                     |          |
|                                                                                   | RBM13<br>( <i>LOC84549</i> ) | 27q15-16     | F: CCAGCAGAATCAGGCAGTC<br>R: CCATGTTTCTTCTTGATTCCA   | 159     | 1.5 | 55 | Perrocheau et<br>al. 2006*                          | DX010520 |
| solute carrier<br>family 25,<br>member 4                                          | SLC25A4                      | 27           | F: AAGGGATCATTGATTGCGTG<br>R: AGTAGGCAGCTCTGTAGATA   | 420     | 1.5 | 60 |                                                     |          |
| sperm<br>associated<br>antigen 11B                                                | SPAG11B                      | 27           | F: AGAAAGCGGAGAACTGC<br>R: GAACAAAGCAGTTTAATGTGG     | 95      | 1.5 | 58 |                                                     | AJ786157 |
| steroidogenic<br>acute regulator                                                  | STAR                         | 27           | F: AGGTCACTCCCCAGAATGGT<br>R: GCTTCCTCTTCCCTGAGTTTG  | 110     | 1.5 | 55 |                                                     | BI960825 |

|                            |         |    |                                                               |           |     |    |                        |          |
|----------------------------|---------|----|---------------------------------------------------------------|-----------|-----|----|------------------------|----------|
| microsatellite             | TKY288  | 27 | F: AGTATGACAGCCCACTCTCG<br>R: ATGCATTTCAAGGAAGCCAG            | 139 - 157 | 2.0 | 58 | Tozaki et al.<br>2000b | AB033939 |
| microsatellite             | TKY315  | 27 | F: GATGCCTCGAACTAGCTTG<br>R: GATCTTCCATGTTTTTGTGTTGG          | 89-105    | 1.5 | 58 | Tozaki et al.<br>2000c | AB034624 |
| microsatellite             | TKY431  | 27 | F: TCCAAATGAGCATCTGCATG<br>R: TTTGCTTGCTTAATTGCCAC            | 159       | 2.0 | 58 |                        | AB103649 |
| microsatellite             | TKY437  | 27 | F: TCCTGGGAAGGGTCCTTATT<br>R: GCTCATTGCTACTGGGGTGT            | 167-183   | 1.5 | 58 | Tozaki et al.<br>2004  | AB103655 |
| microsatellite             | TKY480  | 27 | F: CAGAGGGCAGAGGATTTGTC<br>R: AGGGACGAGGACCAAATGTA            | 263-281   | 1.5 | 55 | Tozaki et al.<br>2004  | AB103698 |
| microsatellite             | TKY576  | 27 | F: ATTGCAGCCAATTTCTACG<br>R: GCAGGGCATATGACAAGAAA             | 270-276   | 1.5 | 58 | Tozaki et al.<br>2004  | AB103794 |
| microsatellite             | TKY603  | 27 | F: TTTTCTGTCTTTTTCACCTTCA<br>R: AACCAGCTTGCAAATCCTGT          | 181-199   | 2.0 | 60 | Tozaki et al.<br>2004  | AB103821 |
| microsatellite             | TKY612  | 27 | F: GAAAGTAAAATCCTAGCAGGAGGA<br>R: AATGATGACATGAGCGGTGA        | 282-284   | 1.5 | 58 | Tozaki et al.<br>2004  | AB103830 |
| microsatellite             | TKY764  | 27 | F: GGTGACCTTTAAAGTCCCTT<br>R: TGCAAGCAAACTTGCCTTG             | 261       | 2.0 | 58 |                        | AB103982 |
| microsatellite             | TKY789  | 27 | F: CATGAGGAGAGGAACAAAGG<br>R: CATCTCTGCTTTGGGAAGGC            | 200       | 2.0 | 58 | Tozaki et al.<br>2004  | AB104007 |
| microsatellite             | TKY804  | 27 | F: GGATGGGTCAAGTGAAAGAG<br>R: TTCCTATGACCTAGTGAAGC            | 250       | 2.0 | 58 | Tozaki et al.<br>2004  | AB104022 |
| microsatellite             | TKY828  | 27 | F: CTCCTTCTGGCTCTACTATT<br>R: GCATGGATTAAGGTGTATGC            | 186       | 2.0 | 58 | Tozaki et al.<br>2004  | AB104046 |
| microsatellite             | TKY1137 | 27 | F: ATCCAAGGAAGAATAGGGTG<br>R: GGGTAAGTTACTCCACATGA            | 221       | 2.0 | 58 | Tozaki et al.<br>2004  | AB104355 |
| microsatellite             | TKY1152 | 27 | F: GGAAGGATAGTTTATGCAGC<br>R: AACCCCAATCCTGAAATCAC            | 222       | 2.0 | 58 |                        | AB104370 |
| microsatellite             | TKY3012 | 27 | F: ATCACATCCTTGGGCATTTA<br>R: CCAAAGCATCCTCCATTCTA            | 304       | 1.5 | 60 | Tozaki et al.<br>2007  | AB216955 |
| TM2 domain<br>containing 2 | TM2D2   | 27 | F: CAAAACCTCTTCCTGGATATCAGAC<br>R: GAAAAAGCAATGTACAGAAATAAAGA | 250       | 1.5 | 60 |                        | CX596200 |

|                                   |          |    |                                                        |         |     |    |                             |          |
|-----------------------------------|----------|----|--------------------------------------------------------|---------|-----|----|-----------------------------|----------|
| transmembrane protein 66          | TMEM66   | 27 | F: CCTGTGATGCTGTAAGAAGC<br>R: CCACTGAAGGACTCAAAGC      | 249     | 1.5 | 58 |                             |          |
| microsatellite                    | UCDEQ005 | 27 | F: AGCGGAAGTGCTGCGAAAG<br>R: CCAGCATCTCTGGGCAGG        | 236-238 | 2.0 | 58 | Eggleston-Stott et al. 1996 | U35423   |
| microsatellite                    | UMNe117  | 27 | F: TCCCTTAAAAGTTCTCCCTTCC<br>R: TGAAAATTATTGTTTGCCCTTG | 139     | 1.5 | 58 |                             |          |
| microsatellite                    | UMNe161  | 27 | F: TTGTCATTTCAAGTCTTTTCC<br>R: TGAAAATTATTGTTTGCCCTTG  | 157     | 1.5 | 58 | Mickelson et al. 2003       | AF536270 |
| microsatellite                    | UMNe186  | 27 | F: TATAAACCTCCCTGATTTGCC<br>R: TGATAGAAGGAGCTAAGCCTGC  | 149     | 2.0 | 58 |                             |          |
| microsatellite                    | UMNe258  | 27 | F: TGCCTATTGTTTGAGGAGGG<br>R: AGCCAGTACAAATTGGGCAG     | 207     | 2.0 | 58 | Mickelson et al. 2003       | AF536320 |
| microsatellite                    | UMNe313  | 27 | F: AGAACCTGTTGGAGATACGAGG<br>R: ATCAGAGTGGAGACATGGGG   | 179     | 2.0 | 58 | Wagner et al. 2004a         | AY391334 |
| microsatellite                    | UMNe379  | 27 | F: ATCCATGGAGTCTCGGAGTG<br>R: ACAAGCAAACAAGCAAAAACC    | 161     | 2.0 | 58 | Wagner et al. 2004b         | AY464470 |
| microsatellite                    | UMNe476  | 27 | F: GAGTCATGTTACCATCCCC<br>R: TTAGACGGTCAGCCAGCAG       | ~200    | 1.5 | 58 | Mickelson et al. 2004       | AY731400 |
| microsatellite                    | UMNe523  | 27 | F: GTTCCTGATATTGAAAACACCC<br>R: TTTTGTGGCATTACTTCCCTAC | 243     | 1.5 | 58 | Mickelson et al. 2004       | AY731406 |
| microsatellite                    | UMNe553  | 27 | F: TCTCAGTGCGGAATTAACCC<br>R: GAGAACTGGACCATGAAAGAGG   | ~250    | 1.5 | 55 | Wagner et al. 2004b         | AY464525 |
| voltage-dependent anion channel 3 | VDAC3    | 27 | F: TGACACAGGGAAAGCATCAG<br>R: CCTGTGTTCTGGTACAAATATGG  | 963     | 1.5 | 58 |                             | DN505151 |
| microsatellite                    | VHL149   | 27 | F: GGAGGCGTTCTGGTCACGTT<br>R: ACTTCAGCCTGTTTGCAGTCA    | 100     | 1.5 | 62 | van Haeringen et al. 1998   |          |



| Name                                            | Symbol                     | Horse chr. | Primers                                                | Product size (bp) | MgCl <sub>2</sub> (mM) | T <sub>a</sub> | Reference                                   | Accession No |
|-------------------------------------------------|----------------------------|------------|--------------------------------------------------------|-------------------|------------------------|----------------|---------------------------------------------|--------------|
| aconitase 2, mitochondrial                      | ACO2                       | 28         | F: TGCACCAACTCCAGCTATGA<br>R: ACATCCCTCAGGATCTGTGC     | 394               | 1.5                    | 58             |                                             |              |
| apoptotic peptidase activating factor 1         | APAF1                      | 28q15      | F: TGAGAAAGGTGGGACACTGA<br>R: GGCTACGTCCAATAGTTAAGCAA  | 155               | 1.5                    | 62             |                                             |              |
| arylsulfatase A                                 | ARSA                       | 28         | F: AGGCTACCTCACAGGAATGG<br>R: GCTCCACTCAGGTGTCTGGT     | 210               | 2.0                    | 58             | Caetano et al. 1999                         | AF130747     |
| activating transcription factor 4               | ATF4                       | 28         | F: CGAGAAGCTGGATAAGAAGC<br>R: CAGGTACTGGATCTCCTTGG     | 178               | 1.5                    | 58             |                                             | CX602876     |
| B-cell translocation gene 1, anti-proliferative | BTG1                       | 28         | F: GTACTGGAAGTTTTATGACAAGA<br>R: TGCTAACACCACAGTTGAGA  | 208               | 1.5                    | 58             |                                             | CX600800     |
| cysteine and glycine-rich protein 2             | CSRP2                      | 28         | F: CTTGTTTCACGCTCAGTAAAGG<br>R: CCGCAGAGGTTTCACAGTAGT  | 109               | 1.5                    | 50             |                                             | DN508680     |
| cytochrome P450, 2d region, gene family         | CYP2D@<br>( <i>CYP2D</i> ) | 28q18      | F: ATGACATCCCGTGACATTGA<br>R: CTACTGCATTCCCACATCCA     | 200               | 2.0                    | 58             | Caetano et al. 1999;<br>Mariat et al. 2001* | AF130756     |
| decorin                                         | DCN                        | 28         | F: TGGACAAAGTGCCCAAAGAT<br>R: TTCTTCAGGTTCTTAAAGTCTCCA | 103               | 1.5                    | 58             |                                             |              |
| DEAD box polypeptide 17                         | DDX17                      | 28q16      | F: CAGGCCAATACACCTATGGTC<br>R: CAAACTGTTGTGACATCACTGG  | 204               | 1.5                    | 55             | Perrocheau et al. 2005                      | AY817461     |
| FLJ21963 protein                                | FLJ21963                   | 28         | F: TGGCAAGGAAGATCCTTTGA<br>R: CATTGACAAGGGCAGACAGA     | 311               | 1.5                    | 58             |                                             |              |
| GLI pathogenesis-related 1 (glioma)             | GLIPR1                     | 28q12-13   | F: GCCTGGATGGTTTCTTTAGTC<br>R: GATCGGAACCTTGTTGTGCAT   | 113               | 1.5                    | 58             |                                             | DN505358     |
| glycosyltransferase 8 domain containing 2       | GLT8D2                     | 28         | F: CACTGGAATGGAAGACACAAG<br>R: CGGTGTTATAGTAGGCTGCAA   | 189               | 1.5                    | 58             |                                             | CX601670     |
| microsatellite                                  | HTG30                      | 28         | F: TCAAGGCAAATCTTTCCCAG<br>R: GTAAAATAACAAGTTGTTCCAG   | 242               | 2.0                    | 58             | Lindgren 2000                               |              |
| insulin-like growth factor 1                    | IGF1                       | 28q15      | F: CATTTCAAAGATGGGCATTC<br>R: TACCAACTCCAGGACCGTTT     | 227               | 1.5                    | 58             |                                             | U85272.1     |

|                                                           |                      |       |                                                         |         |     |    |                  |          |
|-----------------------------------------------------------|----------------------|-------|---------------------------------------------------------|---------|-----|----|------------------|----------|
| IKK interacting protein                                   | IKIP                 | 28    | F: GTGAAGAGCCGGAAGAAGTC<br>R: ACGTCCCCAGAGAGAGCA        | 151     | 1.5 | 54 |                  | CX602699 |
| KIT ligand                                                | KITLG                | 28q14 | F: CCCCACTGGGTCCCTATAAT<br>R: AAGGCCAAGTGCAATACCAG      | 261     | 2.0 | 58 |                  | AF165596 |
| KRR1, small subunit processome component, homolog (yeast) | KRR1 ( <i>HRB2</i> ) | 28    | F: CAGGATGATGTCGCATGT<br>R: AACTGTGTTTCCCTGAACC         | ~246    | 1.5 | 56 |                  | CX599475 |
| lectin, galactoside-binding, soluble, 1                   | LGALS1               | 28    | F: CTTTGTGCTGAACCTGGG<br>R: CCACCATCCTTGCTGTTG          | 111     | 1.5 | 58 |                  | BI961629 |
| lumican                                                   | LUM                  | 28    | F: CAGGTGCGTTTACTTTCCTCT<br>R: GTCAGGTTTACCAGTCCATCA    | 487     | 1.5 | 58 |                  |          |
| minichromosome maintenance deficient 5 (S. cerevisiae)    | MCM5                 | 28    | F: CTGCGGAGAAGCTGAAGAAC<br>R: GTGATGGGGATGCTGGAG        | 94      | 1.5 | 62 |                  | DN507453 |
| methionyl aminopeptidase 2                                | METAP2               | 28    | F: GCTTTCAGGACTTTCAGATGTT<br>R: GAGGATATAGGTGCAGAACTGG  | 187     | 1.5 | 58 |                  |          |
| myogenic factor 5                                         | MYF5                 | 28    | F: CTGTTTCAGAGCCCACTAGCC<br>R: GTCCGCTGGTCGTGTATTTT     | 294     | 2.0 | 58 |                  | AF411602 |
| nuclear transcription factor Y, beta                      | NFYB                 | 28    | F: GGCAGAATTGTAGTGAGACGTT<br>R: ACATTTTGTGTTGACCATCTG   | 152     | 1.5 | 58 |                  | CX595848 |
| microsatellite                                            | NVHEQ054             | 28    | F: AGATGTCCACCTTCTCGCTG<br>R: CGGGGCTTTTAGGAGGTAAC TA   | 172-186 | 2.0 | 58 | Roed et al. 2000 | AJ245763 |
| pro-melanin-concentrating hormone                         | PMCH                 | 28q15 | F: CCTTTGTCGAAGATATGGGATT<br>R: CAGCAGGTATCAGACTTGCCAAC | 212     | 2.5 | 58 |                  |          |
| peroxisome proliferator-activated receptor alpha          | PPARA                | 28q18 | F: AGTGACGTCCTAGAGACC<br>R: TCACTGTCTGTCAGTTCCAG        | 292     | 1.5 | 58 |                  |          |
| PWP1 homolog (S. cerevisiae)                              | PWP1                 | 28    | F: AAAGCTGCCTAGAAATGTTCC<br>R: TGCAGAGAGGAATGTCAGG      | 90      | 1.5 | 58 |                  | CX598419 |
| suppressor of cytokine signaling                          | SOCS2                | 28    | F: CGAATACCAAGATGGGAAGTT<br>R: GTTCGCTTATCCTTGACAT      | 123     | 1.5 | 58 |                  |          |

2

|                                         |         |       |                                                        |         |     |    |                        |          |
|-----------------------------------------|---------|-------|--------------------------------------------------------|---------|-----|----|------------------------|----------|
| TIMP<br>metallopeptidase<br>inhibitor 3 | TIMP3   | 28q16 | F: GCTTCCCTCGGACACTAACT<br>R: CGGGTGGAATAGGTGATGT      | 184     | 1.5 | 58 |                        | CX594408 |
| microsatellite                          | TKY299  | 28    | F: TGAAGTTTGAGCCTGGACACC<br>R: TGCAATGTCCTGGGAAATCC    | 120     | 1.5 | 58 | Tozaki et al.<br>2000c | AB034608 |
| microsatellite                          | TKY333  | 28    | F: CCTTCACTAGCCTTCAAATG<br>R: TTGTGTTTAGACAGTGCTGC     | 109-127 | 1.5 | 56 | Tozaki et al.<br>2001  | AB044834 |
| microsatellite                          | TKY364  | 28    | F: TTCACAGCCGTCATTCAAAC<br>R: GATCCTAAACAAGCTGCAGG     | 102-116 | 1.5 | 52 | Tozaki et al.<br>2001  | AB044864 |
| microsatellite                          | TKY425  | 28    | F: CCTGGGTGTCGTGTGTTTTA<br>R: TTCCTCTCTCCTGCCTCATC     | 109-125 | 1.5 | 58 | Tozaki et al.<br>2004  | AB103643 |
| microsatellite                          | TKY467  | 28    | F: GCGAACAGTTGCTGAACACT<br>R: TGCCTTTGGCTCAGAAAAAC     | 234-254 | 1.5 | 55 | Tozaki et al.<br>2004  | AB103685 |
| microsatellite                          | TKY485  | 28    | F: GGTGGTGGTGAGGATAAAGAC<br>R: TTGTAAGAGTTCTGCCATCCA   | 150     | 2.0 | 58 |                        | AB103703 |
| microsatellite                          | TKY493  | 28    | F: CATGTGGATTGTTAGAGCTC<br>R: GATCGTTGAGAAAGATGTGTG    | 179     | 1.5 | 58 |                        | AB103711 |
| microsatellite                          | TKY515  | 28    | F: AGGCCAGCAGTGTTTCCTCTA<br>R: GGCTCAGGTACGTTCCCTTC    | 145-151 | 1.5 | 58 | Tozaki et al.<br>2004  | AB103733 |
| microsatellite                          | TKY768  | 28    | F: TTTGGCTTGAATGGGGAAAG<br>R: ATTCAGTAATCGAACTGGTGTG   | 114     | 2.0 | 58 |                        | AB103986 |
| microsatellite                          | TKY808  | 28    | F: CCTGAGTGCTTTTGAAGTGG<br>R: ATACTTTTTGCCAACTACAAAATA | 128     | 2.0 | 58 | Tozaki et al.<br>2004  | AB104026 |
| microsatellite                          | TKY872  | 28    | F: TGGGGCTTTGGGAGACAT<br>R: CAAGGCCAGAATTTCTTGAAGT     | 124     | 2.0 | 58 | Tozaki et al.<br>2004  | AB104090 |
| microsatellite                          | TKY873  | 28    | F: ATTCCTATCTCTGGAGAACC<br>R: AGATTTGCCTGAAAGTCAGC     | 223     | 2.0 | 58 |                        | AB104091 |
| microsatellite                          | TKY877  | 28    | F: GATCTCTGTCTTCATCTGTCTA<br>R: AGTCAATGTAAAGGTTCTTGGC | 210     | 1.5 | 58 |                        | AB104095 |
| microsatellite                          | TKY1023 | 28    | F: GTACCCCCAAATAAAATGTGC<br>R: ACTTTAATCACTCCCCACTC    | 121     | 2.0 | 58 |                        | AB104241 |
| microsatellite                          | TKY1060 | 28    | F: AAAATGAGGTCATGCTGGAG<br>R: CAAGTAGAAGCATCACCCCTG    | 167     | 2.0 | 58 |                        | AB104278 |

|                                                                         |          |                  |                                                      |         |     |    |                                                                |          |
|-------------------------------------------------------------------------|----------|------------------|------------------------------------------------------|---------|-----|----|----------------------------------------------------------------|----------|
| microsatellite                                                          | TKY1080  | 28               | F: ACAAAGCTGCTGAGAGAAATG<br>R: TCACTGCATACAAGCCAAGTA | 200     | 1.5 | 58 |                                                                | AB104298 |
| microsatellite                                                          | TKY1153  | 28               | F: CTTCGCAGAAAGACATTGAAG<br>R: TCAAATGAAAGGCAACAAGAT | 290     | 1.5 | 58 |                                                                | AB104371 |
| microsatellite                                                          | TKY1168  | 28               | F: GTCTGAAGGACAGATGGTTG<br>R: GGACTGTATATGACCAAAGC   | 101     | 2.0 | 58 |                                                                | AB104386 |
| microsatellite                                                          | TKY3400  | 28               | F: AAGTCAGAAGCCAAGCTTTC<br>R: CGCTCAGATACGCAGAGTG    | 115     | 1.5 | 58 | Tozaki et al.<br>2007                                          | AB217343 |
| translocase of outer<br>mitochondrial<br>membrane 22<br>homolog (yeast) | TOMM22   | 28q16            | F: TGTACCCCTGACCATAGGTG<br>R: CTGCTCTGTCCTCCACAGTC   | 196     | 1.5 | 58 |                                                                | DN510491 |
| tryptophan<br>hydroxylase 2                                             | TPH2     | <b>28q12-q13</b> | F: CATTGTGGGGCTTAGCAGTC<br>R: GGTTCCTTTATGGTATTTTAC  | 138     | 2.0 | 57 |                                                                |          |
| thiosulfate<br>sulfurtransferase                                        | TST      | 28               | F: GTGACTCCCGTGCTTAGTGA<br>R: GGCCAAGTTTATTCCAGTGC   | 129     | 1.5 | 58 |                                                                |          |
| microsatellite                                                          | UCDEQ425 | 28q18            | F: AGCTGCCTCGTTAATTCA<br>R: CTCATGTCCGCTTGTCTC       | 230-250 | 2.0 | 58 | Eggleston-<br>Stott et al.<br>1997;<br>Lindgren et<br>al. 2001 | U67406   |
| microsatellite                                                          | UM003    | 28               | F: GGAGGGACGATAGAGAGTAAG<br>R: GCAGAGATAACGGACATGG   | 135-160 | 3.0 | 58 | Meyer et al.<br>1997                                           | AF195125 |
| microsatellite                                                          | UMNe166  | 28               | F: GTAAAGGGGAACCAAGAATTCC<br>R: GGGCCTGGTACCTCATAAGC | 127     | 2.0 | 58 | Mickelson et<br>al. 2003                                       | AF536273 |
| microsatellite                                                          | UMNe345  | 28               | F: CCAATCTGCTTTTTCACCTTGC<br>R: ATACTGGTAAGGGCACCGTG | 196     | 1.5 | 58 | Mickelson et<br>al. 2004                                       | AY731389 |
| microsatellite                                                          | UMNe354  | 28               | F: AACTGTCCCAATTTTCCCG<br>R: CTTCCGTTCCCTCCCTCTACC   | ~250    | 2.0 | 58 | Mickelson et<br>al. 2004                                       | AY731390 |
| microsatellite                                                          | UMNe465  | 28               | F: CTGTGACTAGGCCAAGGTCTG<br>R: GGGACTAGCTAGACCCTGGG  | ~200    | 1.5 | 58 | Wagner et<br>al. 2004                                          | AY735253 |

| Name                                             | Symbol                       | Horse chr. | Primers                                                    | Product size (bp) | MgCl <sub>2</sub> (mM) | T <sub>a</sub> | Reference                            | Accession No |
|--------------------------------------------------|------------------------------|------------|------------------------------------------------------------|-------------------|------------------------|----------------|--------------------------------------|--------------|
| acyl-Coenzyme A binding domain containing 5      | ACBD5<br>( <i>LOC91452</i> ) | 29         | F: CCGACTGCTTGTAATGAATC<br>R: TGTGTCTGTCTAAAGGGATCT        | 248               | 3.0                    | 58             |                                      |              |
| aldo-keto reductase family 1, member C3          | AKR1C3                       | 29q16      | F: GTCCTGTGTGCAGATAGTGTGGC<br>R: GATTCACATAGGAAAGAGATTTGGG | 173               | 3.0                    | 58             | Chowdhary et al. 2003*               | G62200       |
| Rho GTPase activating protein 12                 | ARHGAP12                     | 29         | F: AAACAAGGGGAACGATACATC<br>R: GGAATTATTTGGCAGTCCCAC       | 171               | 1.5                    | 58             |                                      | CD535148     |
| ADP-ribosylation factor-like 5B                  | ARL5B                        | 29         | F: AGTATGGGGGGCAGGTATGA<br>R: CCTGTAAGCCTGAGACACAAT        | 134               | 1.5                    | 58             |                                      | BC024163     |
| microsatellite                                   | ASB43                        | 29q16      | F: CCCGGGGGATCACTTAGTAG<br>R: TCCTTGACTCTCCACTCATCC        | 101               | 3.0                    | TD60           | Irvin et al. 1998; Lear et al. 1999* | AF004773     |
| BMP and activin membrane-bound inhibitor homolog | BAMBI<br>( <i>NMA</i> )      | 29         | F: ACGTTCTCTCTCCTCCCAAG<br>R: CGTAGGGCACTCCATTAATAAAG      | 400               | 1.5                    | 58             |                                      |              |
| B lymphoma Mo-MLV insertion region               | BMI1                         | 29         | F: CGCAAAACCGATCAAAGGAAA<br>R: AGCAATGGGAAATGAAGACAC       | 466               | 1.5                    | 58             |                                      | CD468823     |
| chromosome 10 open reading frame 97              | C10orf97                     | 29         | F: TATCTTGCTGCTTTGTCCTG<br>R: ACCTCCTTTTATCATCTAACCC       | 298               | 1.5                    | 58             |                                      | BC002225     |
| BAC end sequence                                 | CH241-101F21_SP6             | 29         | F: CTTACCAGTCCGCAGAATCAG<br>R: TGCCACATGATAAGAGCCCC        | 619               | 1.5                    | 58             |                                      | AJ576657     |
| COMM domain containing 3                         | COMMD3<br>( <i>BUP</i> )     | 29         | F: CCTGCATATTCGGTGACCT<br>R: CTAATCTCTGGGTGGGATTG          | 157               | 1.5                    | 58             |                                      |              |
| microsatellite                                   | COR021                       | 29         | F: CTGTAGCCAGCCCTGACAGT<br>R: GATGGTGGGGTATTTGTCCA         | 202               | 2.0                    | 58             | Murphie et al. 1999                  | AF101390     |
| microsatellite                                   | COR027                       | 29         | F: CAGCTCTGCAATTTCTCCTC<br>R: AATGACCAAGGCATTGAAAG         | 219-243           | 5.0                    | TD60           | Murphie et al. 1999                  | AF101396     |

|                                                                                                                                                                                    |                              |               |                                                           |           |     |    |                           |          |
|------------------------------------------------------------------------------------------------------------------------------------------------------------------------------------|------------------------------|---------------|-----------------------------------------------------------|-----------|-----|----|---------------------------|----------|
| microsatellite                                                                                                                                                                     | COR082                       | 29            | F: GCTTTTGTCTCAATCCTAGC<br>R: TGAAGTCAAATCCCTGCTTC        | 196-226   | 2.0 | 58 | Tallmadge<br>et al. 1999b | AF154935 |
| cAMP<br>responsive<br>element<br>modulator<br>cubilin                                                                                                                              | CREM                         | 29q13         | F: TCATGCTCACATTACCAAG<br>R: ACGTACAGTGAAGCATTTTAGG       | 386       | 1.5 | 60 |                           | CD535436 |
| FERM domain<br>containing 4A<br>glutamate<br>decarboxylase 2<br>GATA binding<br>protein 3<br>GDP<br>dissociation<br>inhibitor 2<br>microsatellite                                  | CUBN                         | 29q14         | F: TGCCTTGTGGTGGAACATTTA<br>R: GGTGGGTCCTGAAACTCTAAG      | 202       | 1.5 | 55 | Perrocheau<br>et al. 2006 | DX010619 |
|                                                                                                                                                                                    | FRMD4A                       | 29            | F: ATCCTTCCTAGCCCTGAGTTCC<br>R: ACTTCAAAACACACCCATTCCC    | 658       | 1.5 | 58 |                           | AJ576877 |
|                                                                                                                                                                                    | GAD2                         | 29q14-<br>q15 | F: AAGTAGTCCCCGAAATAGTGAT<br>R: TACAATAGCATTTCGGCACAG     | 356       | 1.5 | 60 | Perrocheau<br>et al. 2006 | DX010491 |
|                                                                                                                                                                                    | GATA3                        | 29q15-<br>q16 | F: TCCAAAAAGTGCAAAAAGGTG<br>R: ATACTGGAAGGGTGGTGAGGT      | 200       | 1.5 | 55 |                           |          |
|                                                                                                                                                                                    | GDI2                         | 29            | F: AGATTTACAGGGTCATGC<br>R: CAGCTCTCCAAGGCCATA            | 736       | 2.0 | 58 |                           |          |
| inter-alpha<br>(globulin)<br>inhibitor H2<br>kinesin family<br>member 5B<br>microsatellite                                                                                         | HP12                         | 29            | F: TCACACGAAACCAGTCACGGGAG<br>R: ACAGACACTGCTGGAGTCTCATGG | 132-148   | 1.5 | 58 | Swinburne<br>et al. 2005  | BM780631 |
|                                                                                                                                                                                    | ITIH2                        | 29            | F: CAGTGGGAAAGGTTTCATCG<br>R: TTATAAGCCACCGTGCTGTC        | 194       | 1.5 | 62 |                           |          |
| microtubule<br>associated<br>serine/threonine<br>kinase-like<br>myeloid/lymphoi<br>d or mixed-<br>lineage leukemia<br>translocated to10<br>membrane<br>protein,<br>palmitoylated 7 | KIF5B                        | 29            | F: CCTCCTTTCCCTGAAACTCC<br>R: ACATGAGTAACGTGAGTTACAC      | 234       | 1.5 | 60 | Coogle et al.<br>1996     | AF075620 |
|                                                                                                                                                                                    | LEX018                       | 29            | F: TTCATCACTTTCTGCTTCC<br>R: TTCTCTTCCTTTGCTCATCCT        | 228 - 242 | 3.0 | 58 |                           |          |
|                                                                                                                                                                                    | MASTL<br>( <i>FLJ14813</i> ) | 29            | F: CAATGATGAAACACCACAACA<br>R: TGCACCTTGAGCATTATCAGATA    | 513       | 1.5 | 60 |                           |          |
|                                                                                                                                                                                    | MLLT10                       | 29            | F: GCTGAAGTCATTGCACCAAC<br>R: GGGCTGGGATTTGTTGTTATT       | 103       | 1.5 | 58 |                           | AB218743 |
|                                                                                                                                                                                    | MPP7                         | 29            | F: AAGCCCTCTTTGACTATGACC<br>R: CACCACGTTGCATCATCTT        | 118       | 1.5 | 58 |                           |          |
|                                                                                                                                                                                    |                              |               |                                                           |           |     |    |                           | CX597390 |

|                                                       |                            |        |                                                           |         |     |    |                     |          |
|-------------------------------------------------------|----------------------------|--------|-----------------------------------------------------------|---------|-----|----|---------------------|----------|
| neuroepithelial cell transforming gene 1              | NET1<br>( <i>HES1G05</i> ) | 29qter | F: GGCTCAAAAACAGTATGGCTTG<br>R: GCCTTTTCAAATTGGCATGTCTTTA | ~150    | 1.5 | 65 | Vaiman et al. 2000  |          |
| optineurin                                            | OPTN                       | 29     | F: ATGTCCCAACCAACCACTTAG<br>R: CTCCTTCTGTTTCTCTGTCC       | ~1230   | 1.5 | 62 |                     | BI961284 |
| sequence tagged site                                  | 29STS01                    | 29     | F: GCCCCAAATGTGGAGAAGT<br>R: AGTACAACCTCTGGAGGAAG         | 137     | 1.5 | 58 |                     |          |
| 6-phosphofructo-2-kinase/fructose-2,6-biphosphatase 3 | PFKFB3                     | 29     | F: GCCTACATGACGAGATGGAAC<br>R: CAAACCAACGAACGACTACAC      | 450     | 1.5 | 58 |                     | BM734895 |
| plexin domain containing 2                            | PLXDC2                     | 29     | F: GGTGGCTCTTATACTGTGTTC<br>R: GCACTGTCTGCTTAAATTTCTC     | 434     | 1.5 | 58 |                     | AJ576646 |
| Sec61 alpha 2 subunit                                 | SEC61A2                    | 29     | F: ACAATGGTTTGTGACCCTCC<br>R: TCCCTGACTGCTATCTACCC        | 256     | 1.5 | 60 |                     |          |
| supervillin                                           | SVIL                       | 29     | F: ACGCTTGCTTTAAGAGAACC<br>R: TTCATTTGCCTCTGCTGTCC        | 372     | 1.5 | 60 |                     |          |
| microsatellite                                        | TKY112                     | 29     | F: GCCTGTCAACAGATGAATGG<br>R: TTCATGGCTACGTAGTATTCC       | 89-107  | 2.0 | 58 | Mashima et al. 2001 | AB053347 |
| microsatellite                                        | TKY325                     | 29     | F: ACCTTAACAGCACTTAGAAG<br>R: TGGATGAACCATGAATAGTG        | 173-193 | 1.5 | 58 | Tozaki et al. 2001  | AB044826 |
| microsatellite                                        | TKY332                     | 29     | F: CAAGGACAACTTCTCAGGAG<br>R: AATAAGAAAGGAGCCAGTCG        | 211-225 | 1.5 | 58 | Tozaki et al. 2001  | AB044833 |
| microsatellite                                        | TKY478                     | 29     | F: GCCTGGGTACCTTTGTTGAA<br>R: GGAACAGAATGGGAGTCCAG        | 110-130 | 1.5 | 60 | Tozaki et al. 2004  | AB103696 |
| microsatellite                                        | TKY628                     | 29     | F: TGACACACAGGACCATCTCG<br>R: AAGTGCCTGAGACCCCATTT        | 222-232 | 1.5 | 58 | Tozaki et al. 2004  | AB103846 |
| microsatellite                                        | TKY715                     | 29     | F: CAGTTTCACAGGAGAGAGAGTCC<br>R: CTGGAGTCCCACCTCCAAC      | 224-246 | 1.5 | 58 | Tozaki et al. 2004  | AB103933 |
| microsatellite                                        | TKY819                     | 29     | F: CACCACAGTGTGACTCTGTT<br>R: CTGGATAGGACAGACAGTTA        | 209     | 2.0 | 58 |                     | AB104037 |
| microsatellite                                        | TKY859                     | 29     | F: GATCAAGACGTGAGGAACAAAT<br>R: TACAAAATAGAGGAGTACTGGC    | 150     | 2.0 | 58 |                     | AB104077 |
| microsatellite                                        | TKY900                     | 29     | F: CTTGTTGTCAAGAGGCAG<br>R: ACCTAAATGTCCTTTGGTGG          | 126     | 2.0 | 58 | Tozaki et al. 2004  | AB104118 |

|                                            |                |       |                                                            |         |     |      |                            |          |
|--------------------------------------------|----------------|-------|------------------------------------------------------------|---------|-----|------|----------------------------|----------|
| microsatellite                             | TKY913         | 29    | F: TAATTTTGCATGCCAGCTG<br>R: AGGTAACAACCTGAACTTGC          | 176     | 2.0 | 58   | Tozaki et al.<br>2004      | AB104131 |
| microsatellite                             | TKY989         | 29    | F: CTTGCAGAAGACATGATTGTC<br>R: AGAAACCTTGCTGAACTGAC        | 118     | 2.0 | 58   |                            | AB104207 |
| microsatellite                             | TKY1866        | 29    | F: TTGTCTCCCAAGTCAATG<br>R: TATCACCTGGAAGACAAGAT           | 244     | 1.5 | 58   | Tozaki et al.<br>2007      | AB215809 |
| microsatellite                             | TKY3085        | 29    | F: GATGACACACTCAGGTAAACACA<br>R: CTTTCATGCTTCACTGTGTGC     | 238     | 1.5 | 58   | Tozaki et al.<br>2007      | AB217028 |
| microsatellite                             | UMNe218        | 29    | F: ATTTTGTACCCATGCCAG<br>R: GCCATCTGTATCCTGCCATC           | 139     | 2.0 | 58   | Wagner et<br>al. 2004c     | AY735238 |
| microsatellite                             | UMNe253        | 29    | F: CAGAAAGATTTCTTCTTTATGGC<br>R: ACTACACTGCCTCTTGGAATATCC  | 222     | 1.5 | 58   | Wagner et<br>al. 2004a     | AY391328 |
| microsatellite                             | UMNe602        | 29    | F: AATAGTCCAAAGGAGCAAGACG<br>R: TTCAGAGTAAGAGAGTGGCGTG     | 161     | 1.5 | 58   | Wagner et<br>al. 2004c     | AY735293 |
| microsatellite                             | VIASH39        | 29    | F: AATGTGATTATAGCAGATAGGGTT<br>R: CTATCCAATCTTCACAATCATGTA | 154-158 | 5.0 | TD60 | Ewen &<br>Matthews<br>1994 | L34845   |
| vimentin                                   | VIM            | 29    | F: TTCATGCCTCCAGTTCACA<br>R: TTTGGAAGACAGCTCGAACA          | 197     | 2.0 | 58   | Caetano et<br>al. 1999     | AF135018 |
| WD repeat<br>domain 37                     | WDR37          | 29q16 | F: AGGGTTGCCCTTCAAATTATG<br>R: ACACAGGAAGAGAGGGAAAC        | 221     | 1.5 | 60   |                            |          |
| zinc finger E-box<br>binding<br>homeobox 1 | ZEB1<br>(TCF8) | 29    | F: CAGACGATGAAGACAACTC<br>R: CTCCTTCTCTTGCACTGCT           | 97      | 1.5 | 58   |                            | AB218752 |



| Name                                                                                      | Symbol<br>(Alias) | Horse chr. | Primers                                                 | Product<br>size (bp) | MgCl <sub>2</sub><br>(mM) | T <sub>a</sub> | Reference              | Accession<br>No |
|-------------------------------------------------------------------------------------------|-------------------|------------|---------------------------------------------------------|----------------------|---------------------------|----------------|------------------------|-----------------|
| adenylosuccinate synthase                                                                 | ADSS              | 30q12      | F: GCCTAATCGTCAAAATAACACC<br>R: TTTTCTGCTGAGACCATTGC    | 362                  | 1.5                       | 58             |                        |                 |
| microsatellite                                                                            | AHT023            | 30q15      | F: TGCTGACATCTGCTATTGTGC<br>R: CTCATCATTTTTTAAGGGCAAG   | 197-207              | 2.0                       | 58             | Swinburne et al. 1997  |                 |
| microsatellite                                                                            | AHT062            | 30         | F: AGAATGTTGGGAGCACATAAGG<br>R: TCCATGACACAATCTCTGCC    | 285-287              | 2.0                       | 58             | Swinburne et al. 2003  | AJ507679        |
| calcium channel, voltage-dependent, L type, alpha 1S subunit                              | CACNA1S           | 30         | F: AGGCAGTGCCCATTCCAGAA<br>R: TGAACCAGGTGGCATTGACG      | 769                  | 1.5                       | 58             |                        | NM_000069       |
| CDC42 binding protein kinase alpha                                                        | CDC42BPA          | 30q13      | F: AGTGAGGTTACTGGCGTGTTG<br>R: CTCAAACGCACTTCTCCAGAC    | 195                  | 1.5                       | 55             | Perrocheau et al. 2006 | DX010558        |
| cell division cycle 73, Paf1/RNA polymerase II complex component, homolog (S. cerevisiae) | CDC73             | 30         | F: AATGAAGAAGGTCACAGATCGA<br>R: AACGCTAATTTAACCAATGGAGA | 191                  | 1.5                       | 58             |                        | NM_024529       |
| cytochrome b5 reductase 1                                                                 | CYB5R1            | 30q15      | F: GATCCTACTTGGTTCGGAGG<br>R: GGGCAGAGAGGTAGACATGT      | 868                  | 1.5                       | 58             |                        | NM_016243       |
| degenerative spermatocyte homolog 1 (Drosophila)                                          | DEGS1             | 30         | F: GTTGTATTTTGGGCATACGC<br>R: TTGGGGTTGATGAAGAGAGG      | 335                  | 1.5                       | 60             |                        |                 |
| dual specificity phosphatase 10                                                           | DUSP10            | 30         | F: GAGCATGCTACCTCAGTCCA<br>R: TGAACAGGCCTTTCTCGTAG      | 194                  | 1.5                       | 58             |                        | NM_015434       |
| epoxide hydrolase 1, microsomal (xenobiotic)                                              | EPHX1             | 30         | F: ACACCAGAGGATCGACAAGG<br>R: GAAGTGGGGGTATCTGTTGAGA    | 160                  | 1.5                       | 58             |                        | NM_000120       |
| estrogen-related receptor gamma                                                           | ESRRG             | 30         | F: AACTCGCTCTGTGTTGTTGC<br>R: AAGGGATGTGCCAATTTCTG      | 289                  | 1.5                       | TD58           |                        | BU746640        |

|                                             |                              |       |                                                            |         |     |    |                        |           |
|---------------------------------------------|------------------------------|-------|------------------------------------------------------------|---------|-----|----|------------------------|-----------|
| fumarate hydratase                          | FH                           | 30    | F: TGCACATTGCTGCTGCAATA<br>R: GCCCAATTTTGATGATCTGG         | 114     | 1.5 | 58 |                        | NM_000143 |
| G patch domain containing 2                 | GPATCH2                      | 30    | F: GCCTAAGAGGAACAGCAAAGA<br>R: ATAGCTGAAAGTCGCTGACAA       | 249     | 1.5 | 58 |                        | DN509877  |
| H2.0-like homeobox 1 (Drosophila)           | HLX1                         | 30    | F: CCGCCTTTCAAGTGAGGCCAG<br>R: AGCCGAGGACGATCCGCTTTC       | 136     | 1.5 | 60 |                        |           |
| microsatellite                              | HMS18                        | 30    | F: CAACAATGAAAATTTGTCCTGTGC<br>R: GTAAATGAGTAGACAATCATGAGG | 170     | 3.0 | 58 | Godard et al. 1997     | U89807    |
| heterogeneous nuclear ribonucleoprotein U   | HNRPU                        | 30q13 | F: CTGACAATAACTGGGAAGGC<br>R: CCTCCACAAATAATGCAACC         | 132     | 3.0 | 58 | Chowdhary et al. 2003  |           |
| microsatellite                              | HTG27                        | 30    | F: ATATGTCATATTTGAACAAGTCG<br>R: GCACTGAAATCGAACATCTAA     | 150     | 3.0 | 58 | Lindgren et al. 2000   |           |
| isoleucine-tRNA synthetase 2, mitochondrial | IARS2<br>( <i>FLJ10326</i> ) | 30q13 | F: GTGTTTTTCGTACTGGGTGGA<br>R: GGCTCAATCACAATGATCACC       | 157     | 1.5 | 55 | Perrocheau et al. 2006 | DX010479  |
| lamin B receptor                            | LBR                          | 30    | F: TAAGAGTCTGCTCGTCTCGG<br>R: TGGATCAGCAGCAAGGTGAAG        | ~1100   | 1.5 | 58 |                        |           |
| microsatellite                              | LEX025                       | 30    | F: CAATCGTGGCCCGGTAAC<br>R: TTCACTCCAATCCTCAGTCA           | 139-156 | 2.0 | 58 | Coogle et al. 1996     | AF075627  |
| microsatellite                              | LEX075                       | 30    | F: TCTGAAAAGTTGCAGTTTGAGAA<br>R: TACAGTGTATTGGGGGCACA      | 219     | 2.0 | 58 | Bailey et al. unpub.   | AF213361  |
| neuron navigator 1                          | NAV1                         | 30    | F: ATCGCTCGCCCTTCCACTTC<br>R: TGGCTTTGGCCTTCTCCTTTTC       | ~500    | 1.5 | 60 |                        |           |
| presenilin 2 (Alzheimer disease 4)          | PSEN2                        | 30    | F: TGTCTCTCTGATGTTGCTG<br>R: CATGAGCGCACTGATCATG           | 867     | 1.5 | 58 |                        | NM_012486 |
| regulator of G-protein signalling 1         | RGS1                         | 30q15 | F: CAAAGTCGTTTGTGCATTTCAG<br>R: TTGCAAAATCAATCTTGTCATCC    | 239     | 1.5 | 54 |                        |           |
| regulator of G-protein signalling 2, 24kDa  | RGS2                         | 30    | F: GCTGCTTTACAACCTGCCAG<br>R: TGATGCTTCCCTCAACACCCC        | 251     | 1.5 | 60 |                        |           |
| regulator of G-protein signalling 18        | RGS18                        | 30    | F: AAGAAACAAGCAAAGAAGCCAA<br>R: TACCGGAGTGGGTCTCTTCA       | ~560    | 1.5 | 60 |                        |           |
| signal recognition particle 9kDa            | SRP9                         | 30    | F: AGAACAGACCAAGCTCAAGATG<br>R: AACCATTCAATCCGTTTCCA       | 72      | 1.5 | 58 |                        | AB218754  |

|                                                                              |          |    |                                                           |         |     |      |                             |          |
|------------------------------------------------------------------------------|----------|----|-----------------------------------------------------------|---------|-----|------|-----------------------------|----------|
| TATA box binding protein (TBP)-associated factor, RNA polymerase I, A, 48kDa | TAF1A    | 30 | F: CAGGAAGAAAATTAAGCGGATG<br>R: GCAAAGAGCAAAGACAGTGA      | 262     | 1.5 | 58   |                             |          |
| microsatellite                                                               | TKY658   | 30 | F: AGGCGCAAGAACTCACTCTG<br>R: GCCAGTTGTCAATTGTGTGG        | 261-277 | 1.5 | 58   | Tozaki et al. 2004          | AB103876 |
| microsatellite                                                               | TKY762   | 30 | F: TTCTTCGTCCCAAATCCAAA<br>R: TCGCTGCGACTACTTTTGAG        | 185-192 | 2.0 | 54   | Tozaki et al. 2004          | AB103980 |
| microsatellite                                                               | TKY897   | 30 | F: GCTGTTCAAGTCACTCTCAG<br>R: ACCCTTCCCGATGTAACTC         | 174     | 2.0 | 58   |                             | AB104115 |
| microsatellite                                                               | TKY1022  | 30 | F: AGAGAGGCAATCTACTCTTC<br>R: TTGGAAGTCTTGGGGTATTG        | 188     | 2.0 | 58   |                             | AB104240 |
| microsatellite                                                               | TKY1178  | 30 | F: TGCCTGATGCTCTAGTGTG<br>R: CGTTAGAGGTGACTGTGTAC         | 183     | 2.0 | 58   |                             | AB104396 |
| troponin I type 1 (skeletal, slow)                                           | TNNI1    | 30 | F: TGAAGCTGAAGGTGCTGGAC<br>R: TCCACGTTCTTCCTCCAGTC        | 1100    | 1.5 | TD60 |                             |          |
| microsatellite                                                               | UCDEQ455 | 30 | F: CCCCTTCACACTCCTCTC<br>R: CAGCAAGTGGGGAATCTA            | 154-166 | 2.0 | 58   | Eggleston-Stott et al. 1999 | U67411   |
| microsatellite                                                               | UMNe078  | 30 | F: CCTATTGCAAATGATTACACC<br>R: AGAGATTTCAAGGAAACATTCC     | 134-152 | 2.0 | 58   | Roberts et al. 2000         | AF191708 |
| microsatellite                                                               | UMNe088  | 30 | F: GATCTTTTCCCTCAGGATGACG<br>R: GGCAAGAATTCAAGTTCTATCCAG  | 201     | 1.5 | 62   | Mickelson et al. 2003       | AF536244 |
| microsatellite                                                               | UMNe340  | 30 | F: TCTGTCTGTCTCGCGCTG<br>R: ACTGTGTACTGGTCCAGGCC          | 133     | 1.5 | 58   | Mickelson et al. 2004       | AY731386 |
| microsatellite                                                               | UMNe463  | 30 | F: AACCACAGACTTTTGGGCC<br>R: GTAAGTCAGGGGTGTGAGAGTG       | 145     | 1.5 | 60   |                             |          |
| microsatellite                                                               | UMNe530  | 30 | F: AATGAAGCCAAGTGAATGGG<br>R: GTCTGAACCCTGTAACCTCACC      | 224     | 1.5 | 58   | Mickelson et al. 2004       | AY731407 |
| microsatellite                                                               | VHL20    | 30 | F: CAAGTCCTCTTACTTGAAGACTAG<br>R: AACTCAGGGAGAATCTTCCTCAG | 89-107  | 4.0 | TD64 | van Haeringen et al. 1994   | X75970   |

|                                          |         |       |                                                       |     |     |    |                           |          |
|------------------------------------------|---------|-------|-------------------------------------------------------|-----|-----|----|---------------------------|----------|
| WD repeat domain<br>26                   | WDR26   | 30    | F: ACTCTCTGCTAGATATCACACC<br>R: CTTTTCACATAGCTTGTTGCC | 440 | 1.5 | 58 |                           | AJ618802 |
| zinc finger CCCH-<br>type containing 11A | ZC3H11A | 30    | F: ACTTCGGTTGCTACTTCCTTT<br>R: CTGTCCATTGCTTTATCAGACA | 298 | 1.5 | 58 |                           | CU004011 |
| zinc finger protein<br>281               | ZNF281  | 30q15 | F: GCGTTTGGTTCTCAGTTCAAG<br>R: CACTCCTGGGACCTTACCTGT  | 202 | 1.5 | 55 | Perrocheau<br>et al. 2006 | DX010612 |

| Name                                                                       | Symbol<br>(Alias) | Horse<br>chr. | Primers                                               | Product<br>size (bp) | MgCl <sub>2</sub><br>(mM) | T <sub>a</sub> | Reference                 | Accession<br>No |
|----------------------------------------------------------------------------|-------------------|---------------|-------------------------------------------------------|----------------------|---------------------------|----------------|---------------------------|-----------------|
| microsatellite                                                             | AHT033            | 31q15-q16     | F: CTGAGGGCGTAAGTCGAGTC<br>R: GTTAATAGGAGCGGTTGTTTGG  | 149-169              | 3.0                       | TD<br>60       | Swinburne<br>et al. 2000  | AJ271518        |
| microsatellite                                                             | AHT034            | 31q16         | F: CTCAGGGCGAATGTTCCCTC<br>R: CCCCACCATGAGTCAAAAAC    | 121-142              | 3.0                       | 58             |                           | AJ271519        |
| brain protein 44-like                                                      | BRP44L            | 31            | F: GTCTTTAACCCAGCTCTCTGC<br>R: GTTGGTTGTCTCATGGTCATT  | 240                  | 1.5                       | 59             |                           |                 |
| chromosome 6<br>open reading frame<br>55                                   | C6orf55           | 31            | F: AGCCCTCGACTTCAGCTTAC<br>R: CACTTCTGCTGGCGTATTG     | 104                  | 1.5                       | 59             |                           | CX596424        |
| BAC end sequence                                                           | CH241-100B15_SP6  | 31            | F: GTGGATCCCATTCTGGAG<br>R: GAATGACCTGCTGTTACCC       | 270                  | 1.5                       | 60             |                           | AJ542717        |
| BAC end sequence                                                           | CH241-100I20_SP6  | 31            | F: CAGCTTCTGCTGTTCAAG<br>R: GTGCCATATGGGAAGATGC       | 296                  | 1.5                       | 59             |                           | AJ543005        |
| BAC end sequence                                                           | CH241-100J19_SP6  | 31q16-q17     | F: GGGGGAAATTTTCTGACTCTG<br>R: TTGCAATTTTCATTTGGCTTC  | 501                  | 1.5                       | 58             |                           | AJ543044        |
| BAC end sequence                                                           | CH241-101A08_SP6  | 31            | F: TAGGCGTGGGTTTAATGGAG<br>R: TTTCTGGTAAATGCCCAAG     | 209                  | 1.5                       | 58             |                           | AJ576467        |
| BAC end sequence                                                           | CH241-102M02_SP6  | 31            | F: GTAGCACGAGGACCAACACC<br>R: TGCGGTTAGGTTGAGAAGTTG   | 223                  | 1.5                       | 60             |                           | AJ584466        |
| BAC end sequence                                                           | CH241-102M06_T7   | 31            | F: ACATGACCCCAGAGGAACTG<br>R: CTGAAGATGGCCAAGGAGAG    | 172                  | 1.5                       | 60             |                           | AJ584473        |
| microsatellite                                                             | COR038            | 31            | F: GCTGGAAAAGAGCAGTTTCA<br>R: TGACATTAACTCCCGCATCT    | 202-208              | 2.0                       | 58             | Murphie et<br>al. 1999    | AF101407        |
| estrogen receptor 1                                                        | ESR1              | 31q16         | F: CAAGGAGGAAAGCAGGGTAG<br>R: TGGGCAATCAGAAATGAATGAG  | 611                  | 1.5                       | 60             |                           |                 |
| fucosidase, alpha-L- 2, plasma                                             | FUCA2             | 31            | F: GCTTAACTGGACTGCTCTGAA<br>R: TGCTAGAAACTTGACATTTGCT | 178                  | 1.5                       | 59             |                           | CX604953        |
| human<br>immunodeficiency<br>virus type I<br>enhancer binding<br>protein 2 | HIVEP2            | 31q16         | F: CCCTGTTCGAGATAATTCACCA<br>R: TGATTTCTTTCCCAGGTGACA | 211                  | 1.5                       | 55             | Perrocheau<br>et al. 2006 | DX010504        |

|                                                                                                                |         |               |                                                       |         |     |    |                                                   |          |
|----------------------------------------------------------------------------------------------------------------|---------|---------------|-------------------------------------------------------|---------|-----|----|---------------------------------------------------|----------|
| katanin p60<br>(ATPase-<br>containing) subunit<br>A 1                                                          | KATNA1  | 31            | F: CAAAAGGCAGGGAAGAGC<br>R: GTAATGTCCGCACCTGAATAAC    | 115     | 1.5 | 60 |                                                   | DN507055 |
| mitogen-activated<br>protein kinase<br>kinase kinase 4                                                         | MAP3K4  | 31q13         | F: GGATAATGGAGCTGCTGGAGT<br>R: GCCAGCCAATGTGTGATAAAT  | 207     | 1.5 | 55 | Perrocheau<br>et al. 2006                         | DX010524 |
| protein-L-<br>isoaspartate (D-<br>aspartate) O-<br>methyltransferase<br>pleiomorphic<br>adenoma gene-like<br>1 | PCMT1   | 31            | F: CAGTGGTCCAGGGACGAACTG<br>R: TCCTTTGCATCCCTCCTCTACC | 228     | 3.0 | 58 | Chowdhary<br>et al. 2003                          | G62181   |
| plasminogen                                                                                                    | PLG     | 31            | F: CATGTGTTGTGCCAATCTGTC<br>R: TTCTTCCATTTTCGGAGGAATC | 248     | 1.5 | 58 |                                                   | BI961408 |
|                                                                                                                |         | 31q12-<br>q14 | F: GTGCCTCGAGTCCCAGATAG<br>R: CCTTGGGGTTTCTCTTAGGC    | 203     | 2.0 | 58 | Lear et al.<br>2000*;<br>Chowdhary<br>et al. 2003 | AF097581 |
| proteasome<br>subunit, beta type,<br>1                                                                         | PSMB1   | 31q12         | F: AACCGATTAAGGCTAACAGCAC<br>R: AACATGCAGAATGTGGAGCAC | 201     | 1.5 | 55 | Perrocheau<br>et al. 2006                         | AY817481 |
| ribonuclease T2                                                                                                | RNASET2 | 31            | F: GATAGAGCTGTGCCTCACCA<br>R: TGGATTTCACTTGCTTTTCAA   | 225     | 1.5 | 58 |                                                   | CX601446 |
| SPARC related<br>modular calcium<br>binding 2                                                                  | SMOC2   | 31            | F: TGAAGGGCTTGATCTCCTTT<br>R: GACCCCAGCCACACACTG      | ~150    | 1.5 | 58 |                                                   |          |
| sorting nexin 9                                                                                                | SNX9    | 31            | F: CGTGTTTAAGAAAAGTGCAGAG<br>R: AAAATGAGAGCAGTTGGAGAG | 225     | 1.5 | 58 |                                                   |          |
| thrombospondin 2                                                                                               | THBS2   | 31            | F: TTTGTCTGCTTGTCATTCTC<br>R: TCCAGCAAAATGGCTCTAAC    | 230     | 1.5 | 58 |                                                   |          |
| microsatellite                                                                                                 | TKY105  | 31            | F: TCGGGACAGGAAAGGAAGCT<br>R: GGTATCCAGAATGAAAGACCCC  | 196-204 | 1.5 | 50 | Mashima et<br>al. 2001                            | AB053344 |
| microsatellite                                                                                                 | TKY274  | 31            | F: CATTCTGGAATTGAAACCTC<br>R: GGGAGTTCTGTTCTGAATGG    | 112-132 | 2.0 | 58 | Tozaki et al.<br>2000b                            | AB033925 |
| microsatellite                                                                                                 | TKY278  | 31            | F: CTAGGGAATACAGAGAGAGC<br>R: GCCACTCCGGTAACAAAATC    | 104-132 | 2.0 | 58 | Tozaki et al.<br>2000b                            | AB033929 |

|                                  |         |           |                                                                 |         |     |    |                                              |          |
|----------------------------------|---------|-----------|-----------------------------------------------------------------|---------|-----|----|----------------------------------------------|----------|
| microsatellite                   | TKY368  | 31        | F: TTCAAGCCAGCAAAATTATAGC<br>R: GTCAGGATAATTTTCAGCCC            | 251-263 | 1.5 | 58 | Tozaki et al. 2001                           | AB044868 |
| microsatellite                   | TKY668  | 31        | F: GCTGTAATGTACCGCTGGT<br>R: TAGGCAGCTGCGATAAGACA               | 159-175 | 1.5 | 58 | Tozaki et al. 2004                           | AB103886 |
| microsatellite                   | TKY755  | 31        | F: CGAAGCTTCCACTCTTTTCC<br>R: CCGAATTATCCCTGCCCTAA              | 220-238 | 1.5 | 58 | Tozaki et al. 2004                           | AB103973 |
| microsatellite                   | TKY919  | 31        | F: GATTGGCAACAGATGTTAGC<br>R: GGAAAGCCTGACATCCTTTC              | 94      | 2.0 | 58 |                                              | AB104137 |
| microsatellite                   | TKY1011 | 31        | F: TCAGGTATGAGGAAAAGGTTG<br>R: TCACTATCTTCAGCCTTTCC             | 103     | 2.0 | 58 |                                              | AB104229 |
| microsatellite                   | TKY2302 | 31        | F: CTTCTGAGGTCATTCCATGG<br>R: TCAGGAAATTCTCTGGAAGA              | 112     | 1.5 | 58 | Tozaki et al. 2007                           | AB216245 |
| microsatellite                   | UMNe157 | 31        | F: TTCAACTGTGTGAGTGTGAATG<br>R: AGCTTTTGTCCAGCAGGAAC            | 94      | 1.5 | 58 | Wagner et al. 2004a                          | AY391304 |
| microsatellite                   | UMNe181 | 31        | F: TTAAGCAACCCAGTGTGTGG<br>R: AGAGAAGAGAATCGGGGGAG              | 149     | 2.0 | 58 | Wagner et al. 2004a                          | AY391314 |
| microsatellite                   | UMNe368 | 31        | F: TCCCAGAAAGCAACACTCAC<br>R: TGTCAGTTCAGATTTTTGGCC             | 292     | 1.5 | 58 | Wagner et al. 2004a                          | AY391353 |
| microsatellite                   | UMNe382 | 31        | F: CTTCATCTCCGCTAGGTTGG<br>R: ATTAATGATAGCGTTGGGGG              | 212     | 2.0 | 58 | Wagner et al. 2004b                          | AY464472 |
| microsatellite                   | UMNe424 | 31        | F: GGCATCACAAGAGAGGTAGAGG<br>R: TTCACAGCCTAGACCCATCC            | 168     | 1.5 | 58 | Wagner et al. 2004c                          | AY735246 |
| microsatellite                   | UMNe546 | 31        | F: AGGAGGAAGGGACAGCTCTC<br>R: GCCCTTATTCTCCCAGGAAG              | 129     | 1.5 | 58 |                                              |          |
| microsatellite                   | VIASH21 | 31q14-q15 | F: AAATGATAACGCCAAGTGCTCT<br>R: ATGTGAGTGCCAGCTTGTGAT           | 247-249 | 2.0 | 58 | Swinburne et al. 2000, Lindgren et al. 2001* | L10926   |
| villin 2                         | VIL2    | 31        | F: AGCAGTTTCATTTACGCCTTC<br>R: ATGTCCCTCCTTCATGCCTC             | 171     | 1.5 | 58 |                                              |          |
| vasoactive intestinal peptide    | VIP     | 31        | F: TGTGTAAAATGTAACTGAATGGAACG<br>R: GCAATGATAATCAAACGCTTTATTTTC | 200     | 2.0 | 58 |                                              |          |
| Wilms tumor 1 associated protein | WTAP    | 31        | F: TCTGTGGCACACTGTGTCTTC<br>R: GAGAGCATCCACAGCATTAGC            | 418     | 1.5 | 58 |                                              | CD468561 |

| Name                                           | Symbol                     | Horse chr. | Primers                                              | Product size (bp) | MgCl <sub>2</sub> (mM) | T <sub>a</sub> | Reference                                     | Accession No |
|------------------------------------------------|----------------------------|------------|------------------------------------------------------|-------------------|------------------------|----------------|-----------------------------------------------|--------------|
| acyl-CoA thioesterase 9                        | ACOT9<br>( <i>ACATE2</i> ) | X          | F: CTTTCATAGTTTCCTGGCTAAG<br>R: CCTTACGGTGTTTTGAACAG | 138               | 1.5                    | 50             | Raudsepp et al. 2004                          |              |
| acyl-CoA synthetase long-chain family member 4 | ACSL4<br>( <i>FACL4</i> )  | X          | F: CATCGGGATGAAATTCTC<br>R: TTCATGACAAGCCAAACC       | 162               | 3.0                    | 58             | Chowdhary et al. 2003                         |              |
| AF4/FMR2 family, member 2                      | AFF2<br>( <i>FMR2</i> )    | X          | F: CCCCAGTGTCTCTCAACAAC<br>R: CCCCCTAACACGTTGCTAGT   | 133               | 1.5                    | 58             | Raudsepp et al. 2004                          |              |
| angiotensin II receptor, type 2                | AGTR2                      | X          | F: TCTTCCTCTATGGGCAACCT<br>R: TGCCAGGGATTCTTCTTTG    | 189               | 1.5                    | 60             | Raudsepp et al. 2004                          |              |
| microsatellite                                 | AHT028                     | Xq15       | F: CCTGGCTTATAGATGGCTGC<br>R: ATTTGGAGATGGGGGTCTTT   | 217               | 1.5                    | 60             | Swinburne et al. 2000*                        | AJ271513     |
| microsatellite                                 | AHT079                     | X          | F: AATTCGTTCCAGCTTTGGC<br>R: CCAGGGCAGAGAGAATCTTG    | 157-159           | 2.0                    | 58             | Swinburne et al. 2003                         | AJ507696     |
| microsatellite                                 | AHT099                     | X          | F: TTCTTGGGCAGGGGATTT<br>R: GGGGTGAGTTGGCTGTATTC     | 167-171           | 2.0                    | 58             | Swinburne et al. 2003                         | AJ507716     |
| microsatellite                                 | AHT124                     | X          | F: CCAGCTGTCACTCACCTCC<br>R: CCCTGGCATGATAAAACACA    | 222               | 1.25                   | 60             |                                               |              |
| A kinase (PRKA) anchor protein 4               | AKAP4                      | Xp13       | F: GGTTTCCAACATGCACTGAG<br>R: TCTCCTTGATTTCCTTACGG   | 346               | 3.0                    | 58             | Raudsepp et al. 2004*                         |              |
| aminolevulinate, delta-, synthase 2            | ALAS2                      | Xp14       | F: GGCTACGCATGAACCAATCT<br>R: GTTAGGCCAGCTCATTCTGC   | 195               | 2.0                    | 58             | Milenkovic et al. 2002*; Raudsepp et al. 2002 | AF133200     |
| aldehyde dehydrogenase 2 family pseudogene     | ALDH2ps                    | Xp13       | F: TTGCCATTATCCAGGGTCTC<br>R: GGGAGGTCATCTGTTGGGTA   | 202               | 2.0                    | 58             | Raudsepp et al. 2002*                         | AF133203     |
| amelogenin (X-linked)                          | AMELX                      | X          | F: AGCAACCAATGATGCCACTT<br>R: GAATATCGGAGGCAGAGGTG   | 197               | 1.5                    | 60             |                                               | AB032193     |
| angiomotin                                     | AMOT                       | X          | F: CTGGTAGACCCCCTGATTTA<br>R: CAGTGGACAGGCAGGATACC   | 153               | 2.0                    | 58             | Raudsepp et al. 2004                          |              |



|                                                             |                          |             |                                                             |     |     |    |                                              |          |
|-------------------------------------------------------------|--------------------------|-------------|-------------------------------------------------------------|-----|-----|----|----------------------------------------------|----------|
| androgen receptor                                           | AR                       | Xq12        | F: GGAGCCCGGAAGTTAAAGAA<br>R: ACCGTCAGCTTCTGGGTTG           | 102 | 1.5 | 58 | Milenkovic et al. 202*; Raudsepp et al. 2004 | AY032721 |
| Rac/Cdc42 guanine nucleotide exchange factor (GEF) 6        | ARHGEF6                  | Xq27        | F: AGCATGTTTTTGGGACTTGG<br>R: GGCAAACAGGAACCCATTTA          | 190 | 1.5 | 62 | Raudsepp et al. 2004*                        | BM734718 |
| arylsulfatase E                                             | ARSE                     | Xp25        | F: TTTGACCTCTCAAGAGACCCTTCT<br>R: ACATTGTCCAGCCTGTCCAGCTGCA | 155 | 1.5 | 58 |                                              |          |
| aristaless related homeobox                                 | ARX                      | X           | F: GAGCAATCAGTACCAGGAG<br>R: AACAGCCGCATTTTGCAC             | 128 | 1.5 | 60 | Raudsepp et al. 2004                         |          |
| ankyrin repeat and SOCS box-containing 12                   | ASB12                    | Xq11        | F: CCTCATGGACATCACCAAGA<br>R: GCAGCTAAGGTGGCCATAA           | 228 | 1.5 | 58 | Raudsepp et al. 2004*                        |          |
| acetylserotonin O-methyltransferase                         | ASMT                     | Xp25        | F: GTTCTCTTTGCTGCCTGTGA<br>R: CAGCAGCTTCAGGGACACAC          | 150 | 1.5 | 60 | Raudsepp et al. 2004                         |          |
| ATG4 autophagy related 4 homolog A ( <i>S. cerevisiae</i> ) | ATG4A ( <i>AUTL2</i> )   | X           | F: GACCTGGAGGAAGATTTTCG<br>R: GTATGCTGTTGGCATATCAG          | 147 | 1.5 | 60 | Raudsepp et al. 2004                         |          |
| ATPase, Cu <sup>++</sup> transporting, alpha polypeptide    | ATP7A ( <i>MNK</i> )     | X           | F: CACAGCAAAGGAGTCCATCA<br>R: CGGTTTCTTGAGTGAGAGGC          | 360 | 2.0 | 58 | Raudsepp et al. 2004                         | AY011430 |
| biglycan                                                    | BGN                      | X           | F: CACTGTTCTCCAGGGGATTC<br>R: GGGGGCTAGTGGTCTTGAAC          | 226 | 2.0 | 58 | Raudsepp et al. 2002                         | AF135019 |
| baculoviral IAP repeat-containing 4                         | BIRC4                    | X           | F: TCAGAACACAGGCGACACTT<br>R: ATCCGTGCTTCGTAATCTGC          | 155 | 1.5 | 63 | Raudsepp et al. 2004                         |          |
| bone morphogenetic protein 15                               | BMP15                    | X           | F: CTCCACCCTTTCCAAGTCAG<br>R: ATGGCATGATTGGGGGAATT          | 140 | 3.0 | 58 | Raudsepp et al. 2004                         |          |
| CD40 ligand                                                 | CD40LG ( <i>TNFSF5</i> ) | X           | F: CAGCTGGCCGTTAAAAGACA<br>R: CCTCCCAAGTGAATGGATTG          | 203 | 1.5 | 60 | Raudsepp et al. 2004                         |          |
| CD99 molecule                                               | CD99                     | <b>Xp25</b> | F: CCGGGTAGATGATGTGGACT<br>R: AAAACGGTTCAATGCCCTTT          | 192 | 1.5 | 60 |                                              | CX598338 |
| CD99 molecule-like 2                                        | CD99L2                   | X           | F: GCAGAGACTGGCACCATC<br>R: CTGTATGCTGAAGCAGAACT            | 111 | 1.5 | 58 | Raudsepp et al. 2004                         |          |
| centrin, EF-hand                                            | CETN2                    | X           | F: GATCGAGATGGAGATGGAGAAG                                   | 144 | 1.5 | 59 |                                              | CX599736 |

|                                                                 |                           |          |                                                                |           |     |    |                                               |          |
|-----------------------------------------------------------------|---------------------------|----------|----------------------------------------------------------------|-----------|-----|----|-----------------------------------------------|----------|
| protein, 2                                                      |                           |          | R: GACCAGGTTTTCACACAATAGCA                                     |           |     |    |                                               |          |
| BAC end sequence                                                | CH241-144B9_SP6           | X        | F: GGAAGTGGCTCGCTCAGTAG<br>R: TAATGCCACAGGGTTTTTCC             | 160       | 1.5 | 58 |                                               |          |
| BAC end sequence                                                | CH241-178I7_T7            | X        | F: ATCGAGCGAGTTGTGCAATA<br>R: TCCAAGTGGCCTTGAATAGA             | 154       | 1.5 | 58 |                                               |          |
| choroideremia                                                   | CHM                       | Xq15-q16 | F: ATTAACCCCCAACCTCCAAT<br>R: ACTGAGGGAGTTCTCCTTG              | 173       | 1.5 | 58 | Raudsepp et al. 2004*                         |          |
| chloride channel 4                                              | CLCN4                     | Xp24-p23 | F: CATCCTGCTTGGGGTCTTT<br>R: GAAATGAGCTCGCTTGTGCT              | 192       | 2.0 | 58 | Raudsepp et al. 2002*                         | AF133199 |
| claudin 2                                                       | CLDN2                     | Xq21dist | F: ATCACCCAGTGTGACATCTA<br>R: CAACAGGAATGAAGCCCAG              | 243       | 1.5 | 58 | Raudsepp et al. 2004*                         |          |
| chloride intracellular channel 2                                | CLIC2 ( <i>HESTX-11</i> ) | Xq29     | F: CAGAGAGTGAGCATATCAGAGAGG<br>R: CTAGGTGTTGAATCCCATGCTAAG     | 108       | 2.0 | 58 | Raudsepp et al. 2004*                         | BI961616 |
| connector enhancer of kinase suppressor of Ras 2                | CNKSR2 ( <i>CNK2</i> )    | X        | F: AGAAGGAGTGGCCATTATGA<br>R: AACCAGGCAAGCAGACTCTT             | 105       | 1.5 | 60 | Raudsepp et al. 2004                          |          |
| HESTX-2, collagen, type IV, alpha 5                             | COL4A5                    | X        | F: CTCTTACCACTTAGATGCCCCC<br>R: GCATCAAGTGAGAAGATGACAGC        | 322       | 3.0 | 58 | Raudsepp et al. 2002                          | G62201   |
| microsatellite                                                  | COR074                    | Xp24-p23 | F: GAAAAGCGTATCTTCTCTTAGTC<br>R: GGGCGATTCATCAGAATCTA          | 281 - 291 | 2.0 | 58 | Tallmadge et al. 1999a; Raudsepp et al. 2002* | AF142611 |
| microsatellite                                                  | COR091                    | X        | F: GGTGATTCAAGGTTAATGGC<br>R: TGTATCTGTCCACAGCATGG             | 205       | 2.0 | 58 | Tallmadge et al. 1999b                        | AF154944 |
| cofactor required for Sp1 transcriptional activation, subunit 2 | CRSP2 ( <i>TRAP170</i> )  | Xp14     | F: TTTCATCAAAAAGACCATCAGTCTTT<br>R: TTGCTTCCTTGGGATGAGTTTATAAC | 300       | 2.0 | 58 | Raudsepp et al. 2002; Chowdhary et al. 2003*  | AF135802 |
| CTP synthase II                                                 | CTPS2                     | X        | F: GTCTTAAACGATGGTGGAGA<br>R: CCTGGACAGCATCAGTAATG             | ~1200     | 2.0 | 56 | Raudsepp et al. 2004                          |          |

|                                                                      |                                |                  |                                                        |      |     |    |                                                           |          |
|----------------------------------------------------------------------|--------------------------------|------------------|--------------------------------------------------------|------|-----|----|-----------------------------------------------------------|----------|
| cullin 4B                                                            | CUL4B                          | X                | F: TTCCTGCTTTAATTAGGGTCCA<br>R: ATTGAGCATTGTGTTTCCAGTT | 150  | 1.5 | 60 |                                                           | AF513243 |
| chromosome X<br>open reading frame<br>6                              | CXorf6<br>( <i>F18</i> )       | Xq29             | F: TCATGGTATCCTGCATGTGC<br>R: CAGGTTGGCAAGAATGGAGT     | 200  | 2.0 | 58 | Tozaki et al.<br>1998*                                    | AB009590 |
| chromosome X and<br>Y open reading<br>frame 3                        | CXYorf3<br>( <i>DXYS155E</i> ) | Xp25             | F: GACATCCCCATGCTGGAC<br>R: CTCGCCCTTGAACATGAG         | 171  | 1.5 | 58 | Raudsepp et<br>al. 2004                                   |          |
| doublecortex;<br>lissencephaly, X-<br>linked                         | DCX                            | X                | F: CAAACAGGGCAGCAATGTC<br>R: TTTGAAGGAGGTTTCAATGC      | 198  | 1.5 | 60 | Raudsepp et<br>al. 2004                                   |          |
| DEAD box<br>polypeptide 3, X-<br>linked                              | DDX3X<br>( <i>DDX3</i> )       | X                | F: GAAGCTGATCGGATGTTGGA<br>R: GGTCTCCACAAACACTAAGG     | ~600 | 1.5 | 58 | Raudsepp et<br>al. 2004                                   |          |
| diaphanous<br>homolog 2<br>( <i>Drosophila</i> )                     | DIAPH2                         | Xq17-<br>q21prox | F: GCCTGTGAAGAACTGAAGAA<br>R: CCCAAAGACTGGGCATTTC      | 107  | 1.5 | 60 | Raudsepp et<br>al. 2004*                                  |          |
| dystrophin                                                           | DMD                            | Xp16             | F: TCTGGAGTGAGTCTGTCAAA<br>R: GAACCCAGTACCTGAAAACA     | 187  | 1.5 | 58 | Milenkovic<br>et al.<br>2002*;<br>Raudsepp et<br>al. 2004 |          |
| ectodysplasin A2<br>receptor                                         | EDA2R<br>( <i>XEDAR</i> )      | X                | F: TGGTTATGGAGAGGGTGGAG<br>R: GGGATGCACTCTTGGTCCT      | 766  | 1.5 | 58 | Raudsepp et<br>al. 2004                                   |          |
| EF-hand domain (C-<br>terminal) containing<br>2                      | EFHC2<br>( <i>FLJ22843</i> )   | X                | F: GAGGATCAGTTTTATACTGTGC<br>R: CATGTAAGGATCTTCTGGAC   | 165  | 1.5 | 58 | Raudsepp et<br>al. 2004                                   |          |
| ephrin-B1                                                            | EFNB1                          | X                | F: GAGCAGCTGACTACCAGC<br>R: CTTGCGCAGCTTCAGTAGC        | ~450 | 1.5 | 55 |                                                           |          |
| EGF-like-domain,<br>multiple 6                                       | EGFL6                          | X                | F: CATTTTTGAAGCAGAACGTG<br>R: TCCACAGATAAAGGGCCATC     | 102  | 1.5 | 58 | Raudsepp et<br>al. 2004                                   |          |
| eukaryotic<br>translation initiation<br>factor 2, subunit 3<br>gamma | EIF2S3                         | Xp22-<br>p21dist | F: CAGGTGCTTGGTGCAGTTG<br>R: TTTGTCTCCTTCAGTACGTACACC  | 102  | 1.5 | 62 | Raudsepp et<br>al. 2004*                                  |          |
| FYVE, RhoGEF                                                         | FGD1                           | X                | F: GACAGACGGCATGTCTTCAA                                | 165  | 1.5 | 55 | Perrocheau                                                | DX010477 |

|                                                         |                    |             |                                                          |      |     |    |                                               |          |
|---------------------------------------------------------|--------------------|-------------|----------------------------------------------------------|------|-----|----|-----------------------------------------------|----------|
| and PH domain containing 1                              |                    |             | R: CTCTTCCATCTCCCTGTCCTC                                 |      |     |    | et al. 2006                                   |          |
| fibroblast growth factor 13                             | FGF13              | X           | F: CTGTGGAAGTGTGATGTTG<br>R: TGTTGTTTAGGGGTAACCACTC      | 141  | 1.5 | 58 | Raudsepp et al. 2004                          |          |
| fragile X mental retardation 1                          | FMR1               | Xq28        | F: GTACCTGGGGTCACTGCTA<br>R: AGCCTCAATTCTCACCTCA         | 290  | 1.5 | 58 | Raudsepp et al. 2004*                         |          |
| glucose-6-phosphate dehydrogenase                       | G6PD               | X           | F: CCAGAATCTCATGGTGCTGA<br>R: GATGACACAGGCGATGTTGT       | 199  | 2.0 | 65 | Raudsepp et al. 2002                          | AF133202 |
| gamma-aminobutyric acid A receptor, epsilon             | GABRE              | Xq29        | F: CGCCTCTTCATCCATGTCTAC<br>R: GCACCTACAGGTTAAGGCAAA     | 112  | 1.5 | 55 | Perrocheau et al. 2005*                       | AY817470 |
| GDP dissociation inhibitor 1                            | GDI1               | X           | F: CTACAGTGGGGCGTAAGAGC<br>R: GTTCCCAGCATCTCTGCTTC       | 259  | 1.5 | 60 | Raudsepp et al. 2004                          | BM735209 |
| gap junction protein, beta 1                            | GJB1               | X           | F: CTACGACCACTTTTTCCCCA<br>R: CCCTGAGATGTGGACCTTGT       | 204  | 2.0 | 58 | Raudsepp et al. 2004                          | AJ319909 |
| glycerol kinase                                         | GK                 | <b>Xp21</b> | F: CTTCTTATGGCTGCTACTTCGTC<br>R: GCAATATGGCATTATTGGTGA   | 613  | 4   | 58 |                                               |          |
| galactosidase, alpha                                    | GLA                | X           | F: AATGACCTCCGACACATCAG<br>R: GAAGCAAAACAGTGCCTGTG       | ~700 | 1.5 | 60 | Raudsepp et al. 2004                          |          |
| glycine receptor, alpha 2                               | GLRA2              | Xq17        | F: TCCTGGGTAACTGATGG<br>R: TGAAGTGGTTTGTCTCTAAG          | 296  | 1.5 | 58 | Milenkovic et al. 2002*; Raudsepp et al. 2004 |          |
| glypican 3                                              | GPC3               | Xq27        | F: CTGACTTCCTAGTGCCCAGCTC<br>R: CCATGTTCTAGAAGCCAAACATAG | 273  | 2.0 | 58 | Lear et al. 2001*                             | G62152   |
| glycoprotein M6B                                        | GPM6B              | Xp22        | F: ATGCTGCATCAAGTGTCTGG<br>R: CAAGGCATGGTCACTTGTGT       | 166  | 1.5 | 65 | Raudsepp et al. 2004*                         | BM414631 |
| G protein-coupled receptor 64                           | GPR64              | X           | F: TGTTTCATTGTGGTCCTGGTT<br>R: GTAAAAATGTAAGGCCAGCG      | 114  | 2.0 | 55 | Raudsepp et al. 2004                          |          |
| G protein-coupled receptor associated sorting protein 1 | GPRASP1 (KIAA0443) | Xq21p<br>ox | F: GGTCAGTCAGGGAAATTCG<br>R: AACTCGGGAGGAGGGATAAT        | 278  | 1.5 | 60 | Raudsepp et al. 2004*                         |          |
| glutamate receptor, ionotropic, AMPA 3                  | GRIA3              | X           | F: CCCTTGGCTTATGAAATCTG<br>R: TTCATTTGGAGGATCCGGAG       | 159  | 2.0 | 58 | Raudsepp et al. 2004                          |          |

|                                                           |                            |             |                                                          |       |     |    |                       |           |
|-----------------------------------------------------------|----------------------------|-------------|----------------------------------------------------------|-------|-----|----|-----------------------|-----------|
| glycogenin 2                                              | GYG2                       | Xp25        | F: GGTTATCCTCTCAAGGGTGT<br>R: TGTCTGCATCCAGGAAGAC        | 170   | 1.5 | 54 | Raudsepp et al. 2004  |           |
| haloacid dehalogenase-like hydrolase domain containing 1A | HDHD1A                     | <b>Xp24</b> | F: CGGCTGTATTTCAGTGGTGT<br>R: CTTCCACCAGCTCCTCTTTG       | 160   | 1.5 | 55 |                       |           |
| hephaestin                                                | HEPH                       | X           | F: TGAAGATGCTGGGCATGCA<br>R: CTTGAAGCTGTCATCCAGG         | 179   | 1.5 | 60 | Raudsepp et al. 2004  |           |
| hypoxanthine phosphoribosyltransferase 1                  | HPRT1                      | X           | F: AGTGATTGCTTTTTGTGTCAGTCA<br>R: TACTTGCAAATGGGCCTTCT   | 112   | 2.0 | 58 | Chowdhary et al. 2003 | AY008794  |
| 5-hydroxytryptamine receptor 2C                           | HTR2C                      | X           | F: ATGTCTGGCCACTACCTAGA<br>R: GAATTGAAACGGCTATGCTC       | 148   | 1.5 | 58 | Raudsepp et al. 2004  |           |
| HECT, UBA and WWE domain containing 1                     | HUWE1 ( <i>UREB1</i> )     | X           | F: GATAAGCCCTTTGTGAGAAGC<br>R: CAGATTAGGCCGAGCACTT       | 171   | 1.5 | 62 | Raudsepp et al. 2004  | BI395210  |
| immunoglobulin superfamily, member 1                      | IGSF1                      | Xq27        | F: CCCTCATCAATCTCCAGGCAAC<br>R: GTACAGTGAGGAGTTACAGGGGCA | ~300  | 2.0 | 58 | Raudsepp et al. 2002* | NM_001555 |
| insulin receptor substrate 4                              | IRS4                       | Xq23        | F: AAAACCACAAAAGCCCACAC<br>R: AAATGGCACTCCGAACCTCAA      | 196   | 1.5 | 60 | Raudsepp et al. 2004* |           |
| integral membrane protein 2A                              | ITM2A                      | Xq14-q15    | F: AATCATTGATGTGCCTGTCC<br>R: CATCAGATAGCAGTTCCCCA       | 368   | 1.5 | 60 | Raudsepp et al. 2004* |           |
| jumonji, AT rich interactive domain 1C                    | JARID1C ( <i>SMCX</i> )    | X           | F: GCATCGCTTACCCCTATGAG<br>R: TGTCTTCCTCTGTGGGTTC        | ~1200 | 1.5 | 63 | Raudsepp et al. 2004  | U52363    |
| Kallmann syndrome 1 sequence                              | KAL1                       | <b>Xp24</b> | F: TAAGTGGTCTCGAATTCAATATTTTC<br>R: TGTGGCGTCGTCTTCACTA  | 100   | 2   | 55 |                       |           |
| KIAA1166                                                  | KIAA1166 ( <i>HCA127</i> ) | X           | F: GAATGACCTAAACAAGCTGC<br>R: ATAGGTCAGGGAGCCTCT         | 119   | 1.5 | 60 | Raudsepp et al. 2004  |           |
| kelch-like 4 ( <i>Drosophila</i> )                        | KLHL4                      | X           | F: GGCTACATATTGGCACCATG<br>R: TTGACATGGGAGGCATCAC        | 165   | 1.5 | 58 | Raudsepp et al. 2004  |           |

|                                                          |                             |          |                                                       |         |     |          |                       |          |
|----------------------------------------------------------|-----------------------------|----------|-------------------------------------------------------|---------|-----|----------|-----------------------|----------|
| kelch-like 13<br>(Drosophila)                            | KLHL13<br>( <i>BKLDH2</i> ) | X        | F: GAGTCATGATGGCCTCTGC<br>R: GCAGCTTCCAGTGTGTCTTG     | 300     | 1.5 | 63       | Raudsepp et al. 2004  |          |
| lysosomal-associated<br>membrane protein 2               | LAMP2<br>( <i>HSTX-9</i> )  | Xq25-q26 | F: CGGTTCTATCTGAAGGAGGTG<br>R: CCTTCACATTGAAAGGCTGA   | ~600    | 1.5 | 58       | Raudsepp et al. 2004* | BI961803 |
| leucine zipper,<br>down-regulated in<br>cancer 1         | LDOC1                       | Xq28     | F: AGAACAGCCAGCTCATGGAA<br>R: GCCGTCTGCACGATAAACTC    | 151     | 1.5 | 58       | Raudsepp et al. 2004* |          |
| microsatellite                                           | LEX003                      | X        | F: ACATCTAACCAGTGCTGAGACT<br>R: GAAGGAAAAAAGGAGGAAGAC | 143-164 | 3.0 | 58       | Coogle et al. 1996    | AF075607 |
| microsatellite                                           | LEX010                      | X        | F: TGGGCTAAAATTTAATTTGGG<br>R: ACCAAAACATATGCAAATTAA  | 198-206 | 2.0 | TD<br>60 | Coogle et al. 1996a   | AF075613 |
| microsatellite                                           | LEX013                      | X        | F: TGCTAGAGGAAGGGATAAAGG<br>R: CTCTGCTCTTCCATTTCTTGC  | 122-128 | 2.0 | 58       | Coogle et al. 1996a   | AF075615 |
| microsatellite                                           | LEX022                      | X        | F: AACATATCCATCGCCTCACA<br>R: TGCAAATTCAGTGAAGTGG     | 101-113 | 2.0 | TD<br>60 | Coogle et al. 1996b   | AF075624 |
| microsatellite                                           | LEX024<br>( <i>UM001</i> )  | X        | F: GGGGGTAGAGGGAAAAAGAG<br>R: TTGTTGGCAGATCCCAGG      | 131-150 | 2.0 | 58       | Coogle et al. 1996b   | AF075626 |
| microsatellite                                           | LEX026                      | X        | F: CAGAGTGAATGGCAAATCC<br>R: CAGCCCTCCAAAGAGTTTAC     | 231-243 | 2.0 | 58       | Coogle et al. 1996c   | AF075628 |
| microsatellite                                           | LEX027                      | X        | F: ACCACTGGGAAACTGTGTAA<br>R: GCCCAGAATCCGAACC        | 187-200 | 2.0 | 58       | Coogle et al. 1996c   | AF075629 |
| microsatellite                                           | LEX028                      | X        | F: AACTGGGGATCACAACACAT<br>R: TTGGTACAGGAGCGTCTCTT    | 268-281 | 2.0 | 58       | Coogle et al. 1996c   | AF075630 |
| LON peptidase N-<br>terminal domain and<br>ring finger 3 | LONRF3<br>( <i>RNF127</i> ) | X        | F: GAATATGGCTGCATCCTAGAG<br>R: TGTGTTGTAACCATCCCCGC   | 126     | 1.5 | 60       |                       |          |
| melanoma antigen<br>family D, 1                          | MAGED1                      | X        | F: TGCAATAGTCTTTCCCCTGAGT<br>R: GATACCAAACTCGACAGCACA | 167     | 1.5 | 59       |                       | CX598229 |
| melanoma antigen<br>family D, 4                          | MAGED4                      | X        | F: AGGTACCCTCAAGGCACGTA<br>R: AATGTTTCGTCTGATTCTCGG   | 455     | 1.5 | 58       | Raudsepp et al. 2004  | BM414656 |
| melanoma antigen<br>family H, 1                          | MAGEH1                      | Xp13-p12 | F: TTATAAGCCGGTGCCCCGT<br>R: GCACCTGAATTGAGGATAGC     | 198     | 1.5 | 58       | Raudsepp et al. 2004* |          |

|                                                              |                       |              |                                                         |        |     |            |                       |          |
|--------------------------------------------------------------|-----------------------|--------------|---------------------------------------------------------|--------|-----|------------|-----------------------|----------|
| monoamine oxidase A                                          | MAOA                  | X            | F: GGATCTGGTCAAGTAAGCGA<br>R: GGCCTCCTTGTAATACATCA      | ~600   | 3.0 | 58         | Raudsepp et al. 2004  |          |
| monoamine oxidase B                                          | MAOB                  | X            | F: GGGGCAAAGAGTTGGAATG<br>R: TCCCCTACCACATGTTGAG        | 375    | 2.0 | 61         | Momozawa et al. 2007  | AB178283 |
| mitochondrial carrier triple repeat 6                        | MCART6<br>(LOC170242) | X            | F: GGAAAGAAAAGCTGGCAC<br>R: GAAGTATTGAGGGCCTTCGT        | 168    | 1.5 | 55         | Raudsepp et al. 2004  |          |
| midline 1                                                    | MID1                  | X            | F: CCCTATTTGTCTGGAGCTC<br>R: GATGATGTTCTGCAGGGTG        | 220    | 1.5 | 58         | Raudsepp et al. 2004  |          |
| midline 2                                                    | MID2                  | X            | F: TTGTGCTCACAGCCTCTGC<br>R: CAGAACTGGCAAGCAATTCTG      | 294    | 1.5 | 53         | Raudsepp et al. 2004  |          |
| male-specific lethal 3-like 1 (Drosophila)                   | MSL3L1                | X            | F: CAATGCAGCCTTTTCAGC<br>R: CTTAATCCATCCACCATCTC        | ~780   | 1.5 | 62         | Raudsepp et al. 2004  |          |
| moesin                                                       | MSN                   | X            | F: AGGATGTGCGGAAGGAAAG<br>R: TCAGGCGGGCAGTAAATATC       | 157    | 1.5 | 50         | Raudsepp et al. 2004  |          |
| myotubularin 1                                               | MTM1                  | Xq29         | F: GGTCTACCAAATAAGACATCTCAAG<br>R: AGCGTTTACAAAAAGCCAGA | 100    | 1.5 | 58         | Raudsepp et al. 2004* |          |
| matrix-remodelling associated 5                              | MXRA5<br>(AdlicanX)   | Xp25         | F: TTTGCCAATGGGACCCTG<br>R: CGGACTGCATGAAGGAGTT         | 274    | 1.5 | 62         | Raudsepp et al. 2004* |          |
| nucleosome assembly protein 1-like 3                         | NAP1L3                | X            | F: CCAGATCACAATGATCCCTT<br>R: TGATGCATTAGGAACCACTC      | 169    | 1.5 | TD<br>65   | Raudsepp et al. 2004  |          |
| neuroligin 4, X-linked                                       | NLGN4X                | Xp25         | F: TTCATGTACACAGACTGGGC<br>R: GTAGAAGTAGGTAGGCGAGC      | 150    | 1.5 | 53 -<br>57 | Raudsepp et al. 2004* |          |
| nuclear receptor subfamily 0, group B, member 1              | NR0B1                 | Xp21<br>prox | F: GGGCAGCATCCTCTACAACA<br>R: CACCTGGAAGCAGGGTAAGT      | 201    | 1.5 | 62         | Raudsepp et al. 2004  | AF167158 |
| nudix (nucleoside diphosphate linked moiety X)-type motif 11 | NUDT11                | Xp13         | F: CTGTTAGTGAGTAGCAGTCG<br>R: CAATGCTAACCGAATCTTCC      | 241    | 1.5 | 58         | Raudsepp et al. 2004* |          |
| microsatellite                                               | NVHEQ075              | X            | F: ATAACCCTGCTTACCCCTCTGT<br>R: CAGGTGACATATCCCAAGGTGTA | 98-112 | 2.0 | 58         | Bjornstad et al. 2000 | AJ245766 |

|                                                          |        |          |                                                           |      |     |    |                                                |           |
|----------------------------------------------------------|--------|----------|-----------------------------------------------------------|------|-----|----|------------------------------------------------|-----------|
| odz, odd Oz/ten-m homolog 1 (Drosophila)                 | ODZ1   | Xq26-q27 | F: CAGCAACGGAGTCCTGAAAA<br>R: GGTTGTCCAGCCATTTTCGT        | 115  | 1.5 | 58 | Raudsepp et al. 2004*                          |           |
| opsin 1 (cone pigments), medium-wave-sensitive           | OPN1MW | X        | F: GACCTGGCAGAGACCATCAT<br>R: CAGCTTGGCATCAAATCTCA        | ~700 | 1.5 | 62 | Raudsepp et al. 2004                           | AF132043  |
| ornithine carbamoyltransferase                           | OTC    | Xp16-p15 | F: TCAGATCTGCTGATAGCCA<br>R: GTGTGGACAACCACTACAAA         | ~200 | 2.0 | 58 | Godard et al. 2000*                            | ECA000935 |
| purinergic receptor P2Y, G-protein coupled, 10           | P2RY10 | X        | F: AGTGCTGCCATATGGGTC<br>R: TATGATAGGGAGTGAAGCAG          | 328  | 1.5 | 58 |                                                |           |
| poly(A) binding protein, cytoplasmic 5                   | PABPC5 | X        | F: GGAAAACCATTCGCGCTTAT<br>R: TTGAGCCGCACTCCATTCA         | 172  | 1.5 | 55 | Raudsepp et al. 2004                           |           |
| p21 (CDKN1A)-activated kinase 3                          | PAK3   | Xq24-q25 | F: TACTCCCTCGGATTATGTAATTTTC<br>R: GGAGGTTTCGAATGCAAGAGGA | 238  | 2.0 | 58 | Raudsepp et al. 2002;<br>Raudsepp et al. 2004* | G62153    |
| pyruvate dehydrogenase (lipoamide) alpha 1               | PDHA1  | X        | F: AATGTGATCTTCACCGGCTG<br>R: GCTTTTAACTCCATTCGGCG        | 115  | 1.5 | 58 | Raudsepp et al. 2004                           |           |
| progesterone receptor membrane component 1               | PGRMC1 | X        | F: GGGCAAACCTGCTGAAGGA<br>R: CTTTCTGGATTTGTGACACAC        | 293  | 1.5 | 60 | Raudsepp et al. 2004                           |           |
| phosphorylase kinase, alpha 1 (muscle)                   | PHKA1  | Xq14     | F: GCAGATGATATCATGTTGGC<br>R: ATGGCACAGATGCTGTGG          | 155  | 1.5 | 58 | Raudsepp et al. 2004*                          |           |
| phosphatidylinositol glycan anchor biosynthesis, class A | PIGA   | X        | F: TGCCTGATTGAAAGAGGGCA<br>R: CAGCATTAGGAATGACGGAC        | 454  | 1.5 | 63 | Raudsepp et al. 2004                           |           |
| praja 1                                                  | PJA1   | X        | F: GTCAAACCAACCAAGAGGAG<br>R: TCCTCCTCACTATCATCTG         | 202  | 1.5 | 58 | Raudsepp et al. 2004                           |           |
| phosphatidylinositol-specific phospholipase C, X         | PLCXD1 | Xp25     | F: ATCTCGGAGTGGCTGGAGAG<br>R: GCCCGAAGATGTTCTCTGAC        | 121  | 1.5 | 58 |                                                | DN510195  |



domain containing 1

|                                                       |                                             |             |                                                             |     |     |    |                      |           |
|-------------------------------------------------------|---------------------------------------------|-------------|-------------------------------------------------------------|-----|-----|----|----------------------|-----------|
| plastin 3                                             | PLS3                                        | X           | F: TGTCAGGGCACACCTGAAAT<br>R: CACTGGGTGGAAAGCAAAAT          | 198 | 1.5 | 62 | Raudsepp et al. 2004 | AW260928  |
| POU domain, class 3, transcription factor 4           | POU3F4                                      | X           | F: ATTACTTGCAGGGAGTTCC<br>R: CCAGCCACTTGTTTCAGCA            | 648 | 2.0 | 58 | Raudsepp et al. 2004 |           |
| protein phosphatase, EF-hand calcium binding domain 1 | PPEF1                                       | X           | F: CTCATCTCCATGGAAGAATT<br>R: GCTTCCATCTTTGTTTAAGTCC        | 122 | 1.5 | 58 | Raudsepp et al. 2004 |           |
| peroxiredoxin 4                                       | PRDX4                                       | X           | F: GACAAGGGAATCCTAAGAC<br>R: TTCTCCGTGTTTGTTCAGTGT          | 111 | 2.0 | 55 | Raudsepp et al. 2004 |           |
| protein kinase, X-linked                              | PRKX                                        | <b>Xp25</b> | F: CGCTTCCTGTACATGCTGATGGAG<br>R: TCTTGGCGAACCCGAAGTCGGTGA  | 229 | 1.5 | 58 |                      |           |
| retinoblastoma binding protein 7                      | RBBP7                                       | X           | F: TGCATATTTGGGAACAGCAA<br>R: TACTGCTCCATGAACGCTTG          | 277 | 1.5 | 62 | Raudsepp et al. 2004 |           |
| RNA binding motif protein 3                           | RBM3                                        | X           | F: ACCTTTTAGAAAGCTCCATGTGTTTT<br>R: ACCAGGGCAGTGATCTTGAGTAA | 300 | 2.0 | 58 | Raudsepp et al. 2002 | NM_016809 |
| RNA binding motif protein, X-linked                   | RBMX                                        | X           | F: TTCCCTAAAGGCCACTTCCT<br>R: CATAACCCGACCACCCTCTA          | 153 | 1.5 | 53 | Raudsepp et al. 2004 | BI961399  |
| ribosomal protein L10                                 | RPL10<br>( <i>HESTX-8</i> )                 | X           | F: GTACATGGTGAAAAGCTGTGG<br>R: GGGCTTCAATCACATGCTC          | 755 | 2.0 | 58 | Raudsepp et al. 2004 | BI961947  |
| ribosomal protein L36a                                | RPL36A<br>( <i>HESTX-10</i> )               | X           | F: CACAATACAAGAAGGGCAAGG<br>R: CACCATAGCCACTCTGCTTC         | 269 | 2.0 | 58 | Raudsepp et al. 2004 | BI961599  |
| ribosomal protein S6 kinase, 90kDa, polypeptide 3     | RPS6KA3                                     | X           | F: GGATATTTGGTACCGTGGTG<br>R: AAGAGACGAAAGCAGGAGCA          | 144 | 1.5 | 58 | Raudsepp et al. 2004 |           |
| spermidine/spermin e N1-acetyltransferase 1           | SAT1<br>( <i>SAT</i> ,<br><i>HESTX-13</i> ) | X           | F: GGTAGCAGAATGGAATGAACCATC<br>R: AGCAAGTACTCCTTGTCGATCTTG  | 111 | 2.0 | 65 | Raudsepp et al. 2004 | BI961507  |
| sex comb on midleg-like 2 (Drosophila)                | SCML2                                       | X           | F: GTTGGCATGAAGTTGGAAGC<br>R: TTTTCACATGTCCCAACAGG          | 176 | 2.0 | 55 | Raudsepp et al. 2004 |           |
| serpin peptidase inhibitor, clade A                   | SERPINA7                                    | X           | F: TCAACCTGTACCGGAGGTTC<br>R: TTCCAGCTCCTTCTTTGGAA          | 230 | 2.0 | 55 | Raudsepp et al. 2004 |           |

member 7

|                                                                     |                                           |              |                                                                                                                |                  |            |          |                                                                              |                    |
|---------------------------------------------------------------------|-------------------------------------------|--------------|----------------------------------------------------------------------------------------------------------------|------------------|------------|----------|------------------------------------------------------------------------------|--------------------|
| microsatellite                                                      | SGCV31<br>( <i>UM038</i> )                | Xq13-<br>q14 | F1: GACAGAACAGAAGAAGACCGG<br>R1: CTTTCAATATGGCTCGCTCCTAC<br>F2: CAAGACAGAACAGAAGAAGAC<br>R2: ATATGGCTCGCTCCTAC | 143<br>113 - 137 | 3.0<br>2.0 | 58       | Godard et al.<br>1997*;<br>George et al.<br>1998;<br>Raudsepp et<br>al. 2002 | U90606<br>AF195583 |
| SH3 domain<br>binding glutamic<br>acid-rich protein<br>like         | SH3BGRL<br>( <i>HESTX-6</i> )             | Xq14-<br>q15 | F: GAAACAGCAAGATGTACTGGG<br>R: CAGGCACATTTTCTCTCATCC                                                           | 110              | 2.0        | 58       | Raudsepp et<br>al. 2004*                                                     | BI961868           |
| shroom family<br>member 2                                           | SHROOM2<br>( <i>APXL</i> )                | Xp25         | F: TCCAGCAGCACGAGGACGCCAA<br>R: TTTCGGGCTGAAGGCTGTCCAA                                                         | 225              | 1.5        | 62       | Raudsepp et<br>al. 2004*                                                     |                    |
| solute carrier family<br>25 member 6                                | SLC25A6                                   | <b>Xp25</b>  | F: CTTTCTGGAGGGGACAACCT<br>R: GCCCAGAAAGATCTGCTTGT                                                             | 102              | 1.5        | 55       |                                                                              |                    |
| solute carrier family<br>6, member 14                               | SLC6A14                                   | X            | F: CTGATTGACCACTTCTGTGC<br>R: CCACCATAGCCAGAATATCCA                                                            | 450              | 1.5        | 60       | Raudsepp et<br>al. 2004                                                      |                    |
| spermine synthase                                                   | SMS                                       | Xp22         | F: GACAGATACTGGCCCACTGC<br>R: GCCAAATCACTTTCCGCCAA                                                             | 867              | 1.5        | 62       | Raudsepp et<br>al. 2004*                                                     |                    |
| sprouty homolog 3<br>( <i>Drosophila</i> )                          | SPRY3                                     | X            | F: AGTGAGCACCTCTTCATC<br>R: CCCTTAACACAGCAGAGACA                                                               | 158              | 2.0        | 55       | Raudsepp et<br>al. 2004                                                      |                    |
| sushi-repeat-<br>containing protein,<br>X-linked                    | SRPX                                      | X            | F: GGAGACCACAAGATCCAGTA<br>R: GTCAGTGGAGCACTTCATGT                                                             | 838              | 1.5        | 58       | Raudsepp et<br>al. 2004                                                      |                    |
| sushi-repeat-<br>containing protein,<br>X-linked 2                  | SRPX2                                     | X            | F: CATGGATCTAGGGACAGGACTC<br>R: GGCTCCTCCAGTGCTATCTAAA                                                         | 129              | 1.5        | 59       |                                                                              | CX595244           |
| steroid sulfatase<br>(microsomal),<br>arylsulfatase C,<br>isozyme S | STS<br>( <i>STS-X</i> ,<br><i>ARSCI</i> ) | Xp25         | F: CTCTTGACAGGGTCTTGGTGT<br>R: GCACCAATGGATGTTTTTCC                                                            | 200              | 2.0        | TD<br>50 | Raudsepp et<br>al. 2002*                                                     | AF133204           |
| synaptobrevin-like 1                                                | SYBL1                                     | X            | F: CGCGAGCCTTTAATTTTCTG<br>R: TGCAGCCAAGACACTTGAGA                                                             | 119              | 3.0        | 56       | Raudsepp et<br>al. 2004                                                      |                    |

|                                                  |                             |      |                                                     |         |     |       |                      |          |
|--------------------------------------------------|-----------------------------|------|-----------------------------------------------------|---------|-----|-------|----------------------|----------|
| TATA box binding protein (TBP)-associated factor | TAF1                        | X    | F: TCTTCGAGGCACCTTTGGA<br>R: ATGTGCTTTAGCAAGGGCTG   | 314     | 1.5 | 58    | Raudsepp et al. 2004 |          |
| transducin (beta)-like 1X-linked                 | TBL1X                       | X    | F: AGTAACAAAGACGTCACCTC<br>R: GGCCTTTATGTTGGCCTAAG  | ~500    | 1.5 | 58    |                      |          |
| TIMP metalloproteinase inhibitor 1               | TIMP1<br>( <i>HESTX-5</i> ) | X    | F: CCTCAGAAGTCAACCAGACC<br>R: CTCCGACCTGTGGAAGTATC  | 345     | 1.5 | 58    | Raudsepp et al. 2004 |          |
| microsatellite                                   | TKY020                      | Xq29 | F: ACAGTGCTCCCTGCTCCGGA<br>R: TCATGCTCAGAGTTTTGGGTG | 149     | 4.0 | 58    | Hirota et al. 2001*  | AB009590 |
| microsatellite                                   | TKY038                      | Xq23 | F: TAAGTATTCTCATAAACGGG<br>R: GGAATAATAACAGCATCCTC  | 134     | 2.0 | 55    | Hirota et al. 2001*  | AB048344 |
| microsatellite                                   | TKY039                      | Xp21 | F: AAGCAGGGATAGTAAAGGAC<br>R: TCTTCCTACCCTTTTTTGGGA | 236     | 2.0 | TD 60 | Hirota et al. 2001*  | AB048345 |
| microsatellite                                   | TKY040                      | X    | F: TATCTCACTTGACCATACCT<br>R: CTGGATTACCATTTGGATTT  | 153     | 2.0 | 58    | Hirota et al. 2001   | AB048346 |
| microsatellite                                   | TKY270                      | X    | F: CTGCTTTAGAGAAACAACT<br>R: CCATGGTGAGAAAAATGAGA   | 166-172 | 1.5 | 52    | Kakoi et al. 2000    | AB048312 |
| microsatellite                                   | TKY514                      | X    | F: TCACCCGCTTCGTCAAATG<br>R: ACTTAACCTCTTGCTATCTCG  | 187     | 2.0 | 58    |                      | AB103732 |
| microsatellite                                   | TKY519                      | X    | F: CCTCCCTGCTGTCAATCCTA<br>R: TTGCAGGAGAACTACCCAAA  | 163-183 | 1.5 | 58    | Tozaki et al. 2004   | AB103737 |
| microsatellite                                   | TKY753                      | X    | F: TATTATTGCCGTCGTCGTTG<br>R: TGTGTGTGGTGTTTGGAGCA  | 175     | 2.0 | 58    | Tozaki et al. 2004   | AB103971 |
| microsatellite                                   | TKY836                      | X    | F: AAGGGCTCGGATTCTTCC<br>R: CTCAGGGAGCCCTCTCTT      | 251     | 2.0 | 58    |                      | AB104054 |
| microsatellite                                   | TKY915                      | X    | F: TCCAATGACGCCTGGAAC<br>R: GATGGTTGCACAACAGTGTG    | 176     | 2.0 | 58    |                      | AB104133 |
| microsatellite                                   | TKY959                      | X    | F: GATGCCACATCTTACTTTC<br>R: TCAAAGTGTTCCAGCTTTGG   | 268     | 2.0 | 58    |                      | AB104177 |
| microsatellite                                   | TKY968                      | X    | F: ATGAGGGAACCATTATCTGC<br>R: TCTGTTTACCTCAGATGGAG  | 211     | 2.0 | 58    |                      | AB104186 |

|                                |                               |              |                                                          |     |     |    |                          |          |
|--------------------------------|-------------------------------|--------------|----------------------------------------------------------|-----|-----|----|--------------------------|----------|
| microsatellite                 | TKY991                        | X            | F: AGGCCCAGAAAGATAAAGTG<br>R: GTTAAGAGTAAGGAGTAGGC       | 160 | 2.0 | 58 |                          | AB104209 |
| microsatellite                 | TKY1073                       | X            | F: AGAGATGAAGTCAGGCTTTC<br>R: TGAACAGGAATTCCCATCTC       | 203 | 2.0 | 58 |                          | AB104291 |
| microsatellite                 | TKY1084                       | X            | F: CACAGTGTGCTCCCATATG<br>R: CTGCCCTCTTCTGGAATTG         | 197 | 2.0 | 58 |                          | AB104302 |
| microsatellite                 | TKY1103                       | X            | F: AGAGAGGAAACTGCAGCTC<br>R: AACAGCTGAACTCTACACTG        | 212 | 2.0 | 58 |                          | AB104321 |
| microsatellite                 | TKY1105                       | X            | F: GATCAAGGTAATAGAAAAGAGTAT<br>R: GAATGGAGGTGGACTATGG    | 217 | 2.0 | 58 |                          | AB104323 |
| microsatellite                 | TKY1130                       | X            | F: TAGACCACAGTTGAAGCTTG<br>R: ACCTTAGGGAAGCTGGAAG        | 222 | 2.0 | 58 |                          | AB104348 |
| microsatellite                 | TKY1135                       | X            | F: AGCACATTTTCGGGGATATC<br>R: AGCTAAAAAACCAGTTGAC        | 163 | 2.0 | 58 |                          | AB104353 |
| microsatellite                 | TKY1996                       | X            | F: AATAAAGCCTGCATTAGGAG<br>R: ATCCTTGGTCTAAAACACAG       | 139 | 1.5 | 58 | Tozaki et al.<br>2007    | AB215939 |
| microsatellite                 | TKY2732                       | X            | F: GATCAGTTAGATAGTCCATAACTAAG<br>R: TAGTTGGACTAGAGCAGAAC | 181 | 1.5 | 58 | Tozaki et al.<br>2007    | AB216675 |
| microsatellite                 | TKY3315                       | X            | F: GGGGTAGAGCAGGGAGAA<br>R: TGTGGTGTTAAACCATGCTG         | 215 | 1.5 | 58 | Tozaki et al.<br>2007    | AB217258 |
| toll-like receptor 7           | TLR7                          | Xp23-<br>p22 | F: GAGGAAAGGGACTGGTTA<br>R: ACACTGCCAGAAGTACGGGT         | 300 | 1.5 | 62 | Raudsepp et<br>al. 2004* |          |
| toll-like receptor 8           | TLR8                          | X            | F: TAGCCAAGGTAAAAGGCTAC<br>R: TGCATGAGGTTGTCTGATGAT      | 211 | 1.5 | 54 | Raudsepp et<br>al. 2004  |          |
| transmembrane<br>protein 47    | TMEM47                        | X            | F: TAGGATTGTGCGTGTTTATCC<br>R: TTTCTGGCTTGTTCTCAACTG     | 362 | 1.5 | 58 |                          | CT974349 |
| transmembrane<br>protein 185A  | TMEM185A<br>( <i>FAM11A</i> ) | X            | F: TGCTGCTGTTCTCTGTGTTG<br>R: ATATTGGGGATTTCGTGCC        | 185 | 1.5 | 58 | Raudsepp et<br>al. 2004  |          |
| thymosin, beta 4, X-<br>linked | TMSB4X                        | Xp23-<br>p22 | F: ATTCCACAAGCATTGCCTTC<br>R: CCCACTTCTTCCTTCACCAA       | 210 | 1.5 | 58 | Raudsepp et<br>al. 2004* |          |
| thymosin-like 8                | TMSL8                         | X            | F: AGCAGGAGAAAGAGTGTGT<br>R: AGGTGAGAAGACATCAGAAGA       | 153 | 1.5 | 60 | Raudsepp et<br>al. 2004  |          |

|                |                          |   |                                                           |           |     |    |                                    |          |
|----------------|--------------------------|---|-----------------------------------------------------------|-----------|-----|----|------------------------------------|----------|
| tenomodulin    | TNMD<br>( <i>CHM1L</i> ) | X | F: TCACTTCCCTACCAACGACA<br>R: GGCATGATGACACGACAGAT        | 550       | 1.5 | 65 |                                    | AB059407 |
| microsatellite | UCDEQ428                 | X | F: CTTTTCCCCGAACCTCCTAC<br>R: TTGGATGCTCCGAGAAGAGT        | 125 - 137 | 3.0 | 58 | Swinburne<br>et al. 2000           | U67407   |
| microsatellite | UCDEQ502                 | X | F: CCTTGGGCTTTAGCAACT<br>R: CCATTGGAACTGAGAGG             | 155 - 167 | 3.0 | 58 | Eggleston-<br>Stott et al.<br>1997 | U67420   |
| microsatellite | UM035                    | X | F: GTGATGGATGACATGAGG<br>R: GCATTTAAAACACTAGAACAC         | ~200      | 2.0 | 58 |                                    | AF195581 |
| microsatellite | UMNe058                  | X | F: GATCCAAGACTTGAAGGTTAGC<br>R: TTTCTCACCATCCTCCTTGAC     | 143 - 165 | 2.0 | 58 | Roberts et<br>al. 2000             | AF191693 |
| microsatellite | UMNe060                  | X | F: TGTGGCAGGAAAAACACATG<br>R: CCATAATCCATGAGCCTATTCC      | 146 - 154 | 2.0 | 55 | Roberts et<br>al. 2000             | AF191694 |
| microsatellite | UMNe091                  | X | F: GCAACAATAAGATACCCAAAGCAG<br>R: GATCTTGGCCAACAACCTCGTC  | 153       | 1.5 | 58 | Wagner et<br>al. 2004a             | AY391286 |
| microsatellite | UMNe107                  | X | F: TGCATATGTAGATGTATATAGGACAGG<br>R: TTTCCCTACACTGGGACTGC | 143       | 1.5 | 55 | Mickelson et<br>al. 2003           | AF536250 |
| microsatellite | UMNe134                  | X | F: CACTCTGGCTTATGTTTGTGC<br>R: GAGTTCTGTGGCTAATCCTTG      | 116       | 1.5 | 58 |                                    |          |
| microsatellite | UMNe148                  | X | F: GATCAAACACTAGAATGTTTCACAC<br>R: CAGCTGTGAGGCAGAGACTG   | 110       | 1.5 | 65 | Mickelson et<br>al. 2003           | AF536262 |
| microsatellite | UMNe202                  | X | F: ATGATTCCAAATGAGGCCTG<br>R: AGCAATCCTTGCAGGCAG          | 187       | 2.0 | 58 | Mickelson et<br>al. 2003           | AF536285 |
| microsatellite | UMNe266                  | X | F: TTCCAAAAAACATAACAGGGTG<br>R: CCAATTTGAATGCTTTTCATTG    | 150       | 2.0 | 58 | Mickelson et<br>al. 2003           | AF536324 |
| microsatellite | UMNe350                  | X | F: GCAAAATAAAAGGGTCACTTGC<br>R: AGTGCTCCAGGTGCTTATATCC    | 153       | 2.0 | 58 | Wagner et<br>al. 2004a             | AY391343 |
| microsatellite | UMNe360                  | X | F: ATCAAGCCATGCTGTAGCG<br>R: ATGCAGCAGTCTACCGCC           | 169       | 2.0 | 62 |                                    |          |
| microsatellite | UMNe363                  | X | F: ACTTACCCATCAACAAAATGGG<br>R: TTGGGACTTCTCAGCCTCC       | 211       | 2.0 | 58 |                                    |          |

|                |         |   |                                                               |      |     |    |                     |          |
|----------------|---------|---|---------------------------------------------------------------|------|-----|----|---------------------|----------|
| microsatellite | UMNe375 | X | F: GGAGCCAGTTCAAAGATTTCC<br>R: ATTCAGTGGGTGTTTTGCC            | 130  | 2.0 | 58 | Wagner et al. 2004a | AY391357 |
| microsatellite | UMNe376 | X | F: ACGCATATTAAAGTTTGAGAAAGTCC<br>R: CAGACCTACTGAATTGGAATACACC | 155  | 2.0 | 58 | Wagner et al. 2004a | AY391358 |
| microsatellite | UMNe386 | X | F: ACTTCCACAATCATGTGAGCC<br>R: CTGTGTGATTTGGGGCAAG            | 169  | 2.0 | 62 |                     |          |
| microsatellite | UMNe387 | X | F: AACTCATTTCAGACCACTAGGGG<br>R: ATCACTCAGAGAAAAGTGCCTG       | 144  | 2.0 | 58 |                     |          |
| microsatellite | UMNe390 | X | F: TATGAGACTCTGACATTTGCTGTG<br>R: ATATTCCCTTCCTGAAACAGTCC     | 195  | 2.0 | 62 | Wagner et al. 2004b | AY464476 |
| microsatellite | UMNe394 | X | F: AGGACACCAGTTTAATCATCGG<br>R: TTCCAAAGCAACAGCAAATG          | 144  | 3.0 | 58 |                     |          |
| microsatellite | UMNe397 | X | F: TGTGGCTCCATCTCTCCAG<br>R: TTTTCATGTCCCTAGGAAATTC           | 126  | 2.0 | 55 | Wagner et al. 2004b | AY464478 |
| microsatellite | UMNe402 | X | F: AAGATGTGGCCTGTTTCAGG<br>R: TTGATTCCTGGAGACTGATGG           | 244  | 2.0 | 58 | Wagner et al. 2004b | AY464479 |
| microsatellite | UMNe415 | X | F: TGGAAACAACCTAAGTGTCGG<br>R: CAGCCTCTCCCTATTTTCCC           | 287  | 1.5 | 60 | Wagner et al. 2004b | AY464483 |
| microsatellite | UMNe437 | X | F: CACTTCGGGGAATAAGCATC<br>R: CTTCAATTGAAAATCCCTTTTCG         | 214  | 1.5 | 50 |                     |          |
| microsatellite | UMNe446 | X | F: AGCATCCAGTCCACTGCAG<br>R: GGCAGGTAAGTTTGAGAACCC            | 378  | 1.5 | 58 | Wagner et al. 2004c | AY735252 |
| microsatellite | UMNe483 | X | F: GTGGAGGTGGGGAGAAGAG<br>R: GCTCTCAGGAGCACAGGC               | ~200 | 1.5 | 60 | Wagner et al. 2004b | AY464500 |
| microsatellite | UMNe492 | X | F: GATTTGCATTTTGTATTGCTGC<br>R: ATTCTGTGGATGTGTGAAGGC         | ~400 | 1.5 | 60 | Wagner et al. 2004b | AY464504 |
| microsatellite | UMNe511 | X | F: TTTTCCCACTCCTCAGCC<br>R: TCTGCTCCAATGTTACAGC               | 349  | 1.5 | 58 |                     |          |
| microsatellite | UMNe522 | X | F: GCAATCCCACATCTGGGTAG<br>R: TCTGACCTCAAGGTCCATCC            | ~200 | 1.5 | 62 | Wagner et al. 2004b | AY464516 |
| microsatellite | UMNe594 | X | F: CAGTAAATTTTTTCGTGTGG<br>R: TTGCATTGTACACTTTAAATGG          | 138  | 1.5 | 58 |                     |          |

|                                                              |                                |              |                                                         |           |     |          |                                                              |          |
|--------------------------------------------------------------|--------------------------------|--------------|---------------------------------------------------------|-----------|-----|----------|--------------------------------------------------------------|----------|
| microsatellite                                               | UMNe596                        | X            | F: CCAGCGTTTTCTTGTTTTAAGG<br>R: CAAAGCTCACCCCTTCCC      | 249       | 1.5 | 58       |                                                              |          |
| microsatellite                                               | UMNe597                        | X            | F: ACCTTCAAATGCCCAAAGTG<br>R: TATGCTTGCTTTTGTCTGTC      | 318       | 1.5 | 58       |                                                              |          |
| ubiquitin specific<br>peptidase 11                           | USP11                          | X            | F: TCATGGATGTAAACTGACAGGC<br>R: GGGACAGGGACAACCATAAATA  | 280       | 1.5 | 59       |                                                              | CX598430 |
| ubiquitin specific<br>peptidase 9, X-<br>linked              | USP9X<br>( <i>HESTX-7</i> )    | X            | F: GCATGGTAGCTCTCTTCAGCA<br>R: GTTCATCTCCAAGCCATTCC     | 266       | 2.0 | 68       | Raudsepp et<br>al. 2004                                      | BI961890 |
| microsatellite                                               | VHL81                          | Xq24-<br>q26 | F: CAACTATGTACTTTGGGGAGCT<br>R: GTCCATGAAATTCTAGTTGTTGC | 162 - 174 | 2.0 | 58       | van<br>Haeringen et<br>al. 1998;<br>Raudsepp et<br>al. 2002* | Y08443   |
| WD repeat domain<br>40B                                      | WDR40B<br>( <i>LOC139170</i> ) | X            | F: ACCTGTGGGTGAACTACTTC<br>R: GAGGCCTGAAGGGAGAGG        | 119       | 1.5 | TD<br>65 | Raudsepp et<br>al. 2004                                      |          |
| WD repeat domain<br>45                                       | WDR45<br>( <i>JM5</i> )        | X            | F: GGGTAGAGCCGGAAGAGTC<br>R: TGCTTGGGGTTGGTAG           | 100       | 3.0 | 55       | Raudsepp et<br>al. 2004                                      | BI395200 |
| microsatellite                                               | XCA001                         | X            | F: AACTCCTCGTTCTCATGTTGC<br>R: TGCAGACTGCCAGCTGATAC     | 233       | 1.5 | 58       |                                                              | AY820147 |
| Xg blood group                                               | XG                             | Xp25         | F: AGAACGTGTGAGGGCTTCAG<br>R: GCTCATTGATTTCAAGCAGGA     | 168       | 1.5 | 58       |                                                              | CX597271 |
| X (inactive)-specific<br>transcript                          | XIST                           | Xq13         | F: ACCCATTGAAAACCCATTGA<br>R: GGGGGTGGAGGAAGTAGAAG      | 200       | 2.0 | TD<br>60 | Shiue et al.<br>2000* ;<br>Raudsepp et<br>al. 2002           | U50911   |
| zinc finger, BED-<br>type containing 1                       | ZBED1                          | <b>Xp25</b>  | F: AACGAGGTACCCCTCAAGT<br>R: GTTCCTCTTGGCGCTGAC         | 154       | 1.5 | 55       |                                                              |          |
| zinc finger, DHHC-<br>type containing 9                      | ZDHHC9                         | Xq26-<br>q27 | F: GGACTTTTGATGATGTTTGACC<br>R: TTCTTTCTCACCACCATCAC    | 150       | 1.5 | 58       | Raudsepp et<br>al. 2004*                                     |          |
| Zic family member<br>3 heterotaxy 1<br>( <i>Drosophila</i> ) | ZIC3                           | X            | F: CAGATGGTTGTTTAACTGCG<br>R: CAGGGATGATTAATCCAGC       | 145       | 1.5 | 63       | Raudsepp et<br>al. 2004                                      |          |

|                            |                  |   |                                                |       |     |    |                         |
|----------------------------|------------------|---|------------------------------------------------|-------|-----|----|-------------------------|
| zinc finger protein<br>711 | ZNF711<br>(ZNF6) | X | F: GAGCATATGGGGAACACA<br>R: CATCTTCTCCCGCTGCAT | ~1200 | 1.5 | 60 | Raudsepp et<br>al. 2004 |
|----------------------------|------------------|---|------------------------------------------------|-------|-----|----|-------------------------|
