# Supplementary material
Source: publisher figshare collection journal article supplement (https://karger.figshare.com/articles/dataset/_/5120452)
Supplement: Supplementary file 7 [file 1]

**Supplementary Table 5.** Chromosome-wise distribution of marker retention frequencies on the horse x hamster 5000<sub>rad</sub> RH panel

| <b>Horse chr.</b> | <b>Retention Frequency, RF</b> | <b>Minimum RF and corresponding markers</b> | <b>Maximum RF and corresponding markers</b> |
|-------------------|--------------------------------|---------------------------------------------|---------------------------------------------|
| ECA1              | 10.4                           | 5.4 (1CA44)                                 | 21.8 (TKY980)                               |
| ECA2              | 17.1                           | 8.7 (BAI2)                                  | 41.8 (ACADL)                                |
| ECA3              | 22.4                           | 9.9 (TKY990)                                | 35.9 (UMNe317)                              |
| ECA4              | 22.6                           | 12.1 (MLL3)                                 | 48.4 (EGFR)                                 |
| ECA5              | 18.1                           | 8.8 (LEX034)                                | 34.1 (Plate9-F07-M13)                       |
| ECA6              | 17.0                           | 9.8 (MMP19)                                 | 41.3 (HDLBP)                                |
| ECA7              | 17.3                           | 7.6 (TKY476)                                | 29.7 (TKY283)                               |
| ECA8              | 18.7                           | 9.8 (PES1)                                  | 30.4 (TKY1045)                              |
| ECA9              | 23.3                           | 13.0 (COPS5)                                | 53.3 (UMNe496)                              |
| ECA10             | 17.8                           | 7.7 (TKY855)                                | 32.2 (RNF159)                               |
| ECA11             | 39.4                           | 7.6 (CXCL16)                                | 98.9 (UMNe096)                              |
| ECA12             | 26.2                           | 15.2 (TKY734)                               | 41.3 (TH)                                   |
| ECA13             | 22.7                           | 6.5 (CH241-106P18_T7)                       | 50.0 (COR069)                               |
| ECA14             | 16.2                           | 8.8 (TKY1053)                               | 26.1 (TKY491)                               |
| ECA15             | 17.5                           | 7.6 (HTG06)                                 | 38.0 (UMNe219)                              |
| ECA16             | 15.0                           | 6.6 (MITF)                                  | 25.6 (UMNe348)                              |
| ECA17             | 12.9                           | 5.4 (HMS41)                                 | 28.6 (TKY328)                               |
| ECA18             | 15.1                           | 8.7 (BIN1)                                  | 24.2 (TUDPEc010)                            |
| ECA19             | 18.9                           | 7.6 (TKY679)                                | 39.1 (VHL011)                               |
| ECA20             | 15.5                           | 8.8 (DQA)                                   | 25.0 (EXOC2)                                |
| ECA21             | 14.1                           | 7.6 (ADAMTS6)                               | 20.7 (TKY824)                               |
| ECA22             | 20.2                           | 11.4 (DDX27)                                | 29.1 (COR016)                               |
| ECA23             | 15.0                           | 5.4 (TKY441)                                | 32.6 (CTSL)                                 |
| ECA24             | 22.7                           | 15.4 (SLC8A3)                               | 37.0 (CALM1)                                |
| ECA25             | 20.3                           | 11.1 (TKY851)                               | 30.8 (SURF2)                                |
| ECA26             | 25.1                           | 16.3 (CSTB)                                 | 31.9 (TKY1233)                              |
| ECA27             | 19.1                           | 8.7 (ADRB3)                                 | 31.5 (DCTD)                                 |
| ECA28             | 20.8                           | 12.0 (TKY808)                               | 33.7 (TPH2)                                 |
| ECA29             | 22.0                           | 13.0 (TKY859)                               | 31.9 (CH241-101F21_SP6)                     |
| ECA30             | 24.4                           | 15.2 (UMNe463)                              | 33.0 (NAV1)                                 |
| ECA31             | 13.7                           | 8.7 (CH241-100B15_SP6)                      | 19.6 (THBS2)                                |
| ECAX              | 12.7                           | 5.4 (BIRC4)                                 | 32.6 (PAB-PAR)                              |
| <b>Average</b>    | <b>19.2</b>                    |                                             |                                             |
